# Supplementary material for: Genomic structural equation modeling reveals shared genetic structure of cardiac function and structure-function association studies of CLCNKA mutations
Source: Research Square preprint supplement (doi:10.21203/rs.3.rs-7363435/v1), 2025-09-19
Supplement: Supplementary file 1 [file 0a96174fbc5758b684823f83.docx]

Table 4b Parameter estimates from the Genomic Structural Equation Modeling (Genomic SEM) common factor model based on six cardiac function-related traits.

| lhs | op | rhs | Unstandardized Estimate | Unstandardized  SE | Standardized Estimate | Standardized SE | pval |
| --- | --- | --- | --- | --- | --- | --- | --- |
| F1 | =~ | LVEF | 0.38 | 0.05 | 0.86 | 0.12 | 1.46E-13 |
| F1 | =~ | LVSV | 0.08 | 0.05 | 0.21 | 0.13 | 1.02E-01 |
| F1 | =~ | LS | 0.22 | 0.04 | 0.51 | 0.09 | 3.34E-08 |
| F1 | =~ | RS | 0.14 | 0.05 | 0.39 | 0.14 | 6.79E-03 |
| F1 | =~ | RVEF | 0.30 | 0.05 | 0.72 | 0.13 | 3.01E-08 |
| F1 | =~ | NT-proBNP | -0.01 | 0.05 | -0.04 | 0.21 | 8.44E-01 |
| LVEF | ~~ | LVEF | 0.05 | 0.04 | 0.26 | 0.20 | 1.85E-01 |
| LVSV | ~~ | LVSV | 0.13 | 0.02 | 0.96 | 0.13 | 4.62E-13 |
| LS | ~~ | LS | 0.14 | 0.02 | 0.74 | 0.12 | 1.85E-10 |
| RS | ~~ | RS | 0.11 | 0.02 | 0.85 | 0.19 | 1.04E-05 |
| RVEF | ~~ | RVEF | 0.08 | 0.02 | 0.48 | 0.13 | 2.73E-04 |
| NT-proBNP | ~~ | NT-proBNP | 0.07 | 0.04 | 1.00 | 0.63 | 1.15E-01 |
