# Supplementary material for: Genomic structural equation modeling reveals shared genetic structure of cardiac function and structure-function association studies of CLCNKA mutations
Source: Research Square preprint supplement (doi:10.21203/rs.3.rs-7363435/v1), 2025-09-19
Supplement: Supplementary file 2 [file 0f5475f0a74aca848953afbf.docx]

Table S1 GWAS data sources

| **Trait** | **Samplesize (n)** | **Study population** | **PMID** |
| --- | --- | --- | --- |
| Left ventricular ejection fraction (LVEF) | 16,923 | European ancestry | 31554410 |
| Right ventricular ejection fraction (RVEF) | 29,506 | European ancestry | 35697868 |
| Left ventricular stroke volume (LVV) | 32528 | European ancestry | 37126556 |
| N-terminal pro-B-type natriuretic peptide  (NT-proBNP) | 11374 | European ancestry | 33441150 |
| Longitudinal myocardial strain  (LS) | 23,321 | European ancestry | 35479509 |
| Radial myocardial strain  (RS) | 26,893 | European ancestry | 37262162 |
