# Supplementary material for: Genomic structural equation modeling reveals shared genetic structure of cardiac function and structure-function association studies of CLCNKA mutations
Source: Research Square preprint supplement (doi:10.21203/rs.3.rs-7363435/v1), 2025-09-19
Supplement: Supplementary file 3 [file 10be71d09587e5ec7d65f1e2.xlsx]

## Sheet: Sheet1
Category	Prop._SNPs	Prop._h2	Prop._h2_std_error	Enrichment	Enrichment_std_error	Enrichment_p	Coefficient	Coefficient_std_error	Coefficient_z-score	FDR
baseL2_0	1	1	1.34831e-07	1	1.34831e-07	NA	5.30823e-09	5.06578e-09	1.04786	NA
Coding_UCSC.bedL2_0	0.0142749	0.184963	0.0884834	12.9572	6.19853	0.0543968	7.13736e-08	6.79882e-08	1.04979	0.113145
Coding_UCSC.extend.500.bedL2_0	0.0636618	0.278258	0.106437	4.37087	1.67191	0.0350025	5.4711e-09	1.2606e-08	0.434008	0.0866728
Conserved_LindbladToh.bedL2_0	0.0256851	0.4596	0.182689	17.8936	7.11266	0.0119732	8.73287e-08	4.24764e-08	2.05594	0.0421666
Conserved_LindbladToh.extend.500.bedL2_0	0.330412	0.789269	0.125171	2.38874	0.378833	0.000211901	-8.50843e-10	5.70347e-09	-0.14918	0.00122432
CTCF_Hoffman.bedL2_0	0.0238662	-0.0184703	0.107165	-0.773914	4.49024	0.689781	-1.67716e-08	3.70056e-08	-0.453219	0.779089
CTCF_Hoffman.extend.500.bedL2_0	0.0708357	-0.0377279	0.122413	-0.532611	1.72812	0.354293	-1.19288e-08	1.65565e-08	-0.720492	0.472391
DGF_ENCODE.bedL2_0	0.136006	0.143279	0.254564	1.05348	1.87171	0.977143	-3.01498e-08	1.6512e-08	-1.82593	0.996303
DGF_ENCODE.extend.500.bedL2_0	0.53847	0.745949	0.148871	1.38531	0.276471	0.184949	4.43697e-10	6.82878e-09	0.0649746	0.300542
DHS_peaks_Trynka.bedL2_0	0.110583	0.575856	0.231872	5.20746	2.09682	0.0442502	-5.04928e-09	2.57356e-08	-0.196198	0.0958753
DHS_Trynka.bedL2_0	0.166201	0.880622	0.264222	5.29855	1.58978	0.00603379	1.91723e-08	2.22924e-08	0.860035	0.0241352
DHS_Trynka.extend.500.bedL2_0	0.496042	0.659207	0.17192	1.32893	0.346584	0.364081	-1.09838e-08	8.76094e-09	-1.25373	0.473305
Enhancer_Andersson.bedL2_0	0.00432768	0.0515842	0.0463541	11.9196	10.7111	0.304253	8.39596e-08	8.14055e-08	1.03137	0.427599
Enhancer_Andersson.extend.500.bedL2_0	0.0190351	-0.0416891	0.0640161	-2.19012	3.36306	0.325708	-5.62941e-08	2.90388e-08	-1.93858	0.445706
Enhancer_Hoffman.bedL2_0	0.0419892	0.268875	0.1218	6.40344	2.90074	0.0683822	2.16867e-08	3.24925e-08	0.667439	0.136764
Enhancer_Hoffman.extend.500.bedL2_0	0.0898451	0.274554	0.116477	3.05586	1.29642	0.117787	-1.36357e-08	2.05826e-08	-0.662488	0.211204
FetalDHS_Trynka.bedL2_0	0.0839308	0.715299	0.216825	8.52249	2.58337	0.00228081	3.3581e-08	2.67614e-08	1.25483	0.010782
FetalDHS_Trynka.extend.500.bedL2_0	0.283362	0.635012	0.162397	2.24099	0.573108	0.040312	-6.37914e-09	9.51236e-09	-0.670616	0.095283
H3K27ac_Hnisz.bedL2_0	0.389076	0.774829	0.0947127	1.99146	0.24343	6.85083e-05	-5.2744e-08	1.98935e-08	-2.65132	0.000530257
H3K27ac_Hnisz.extend.500.bedL2_0	0.420486	1.07878	0.115301	2.56556	0.27421	1.38743e-09	5.74535e-08	2.01923e-08	2.84531	7.21462e-08
H3K27ac_PGC2.bedL2_0	0.268778	0.71777	0.156008	2.67049	0.580433	0.00477424	2.60347e-09	1.79986e-08	0.144649	0.0206884
H3K27ac_PGC2.extend.500.bedL2_0	0.335206	0.774263	0.119973	2.30981	0.357907	0.000187123	-4.35776e-09	1.61923e-08	-0.269125	0.0012163
H3K4me1_peaks_Trynka.bedL2_0	0.169823	0.838024	0.271062	4.93471	1.59615	0.0146735	2.24056e-08	1.44697e-08	1.54845	0.0448835
H3K4me1_Trynka.bedL2_0	0.423685	0.91318	0.214993	2.15533	0.507437	0.0287248	-8.83324e-09	1.28272e-08	-0.688635	0.0786153
H3K4me1_Trynka.extend.500.bedL2_0	0.605819	1.15649	0.0949056	1.90897	0.156657	2.31004e-07	9.18199e-09	8.41946e-09	1.09057	6.00611e-06
H3K4me3_peaks_Trynka.bedL2_0	0.0416488	0.337734	0.145807	8.10909	3.50088	0.0431584	3.66657e-08	2.75275e-08	1.33197	0.0958753
H3K4me3_Trynka.bedL2_0	0.133011	0.353037	0.145356	2.6542	1.09281	0.135845	-2.75435e-08	1.60153e-08	-1.71983	0.235465
H3K4me3_Trynka.extend.500.bedL2_0	0.255139	0.680684	0.121325	2.66789	0.475526	0.00162026	7.86052e-09	8.61311e-09	0.912622	0.00842535
H3K9ac_peaks_Trynka.bedL2_0	0.0384595	0.0877873	0.161124	2.28259	4.18945	0.7588	-3.58009e-08	3.20813e-08	-1.11594	0.822034
H3K9ac_Trynka.bedL2_0	0.125413	0.53723	0.190079	4.28369	1.51563	0.0312907	1.20305e-08	1.97901e-08	0.607906	0.0813557
H3K9ac_Trynka.extend.500.bedL2_0	0.229855	0.750799	0.121225	3.2664	0.5274	7.13807e-05	7.31234e-09	1.14281e-08	0.639859	0.000530257
Intron_UCSC.bedL2_0	0.387473	0.395816	0.0693252	1.02153	0.178916	0.903666	6.88187e-08	7.89181e-08	0.872028	0.939813
Intron_UCSC.extend.500.bedL2_0	0.396796	0.436833	0.0578446	1.1009	0.145779	0.478392	-7.21915e-08	7.88116e-08	-0.916	0.592295
PromoterFlanking_Hoffman.bedL2_0	0.00830845	0.0408787	0.0744002	4.92014	8.95476	0.662131	7.7183e-09	6.68322e-08	0.115488	0.76513
PromoterFlanking_Hoffman.extend.500.bedL2_0	0.0331865	0.131248	0.0812706	3.95487	2.4489	0.237872	5.2461e-09	2.44498e-08	0.214566	0.363805
Promoter_UCSC.bedL2_0	0.0463455	0.121769	0.102406	2.62741	2.20962	0.467619	9.9846e-10	5.47697e-08	0.0182301	0.592295
Promoter_UCSC.extend.500.bedL2_0	0.0569346	0.137397	0.0753887	2.41324	1.32413	0.291078	-2.06549e-09	4.53503e-08	-0.0455453	0.420446
Repressed_Hoffman.bedL2_0	0.460873	0.231357	0.192094	0.501997	0.416803	0.235919	9.98249e-10	6.99274e-09	0.142755	0.363805
Repressed_Hoffman.extend.500.bedL2_0	0.718511	0.287453	0.102758	0.400067	0.143015	4.82008e-06	-5.84549e-09	6.49512e-09	-0.899981	6.2661e-05
SuperEnhancer_Hnisz.bedL2_0	0.16721	0.416758	0.0592929	2.49242	0.354602	3.77175e-06	3.68444e-08	8.42586e-08	0.437278	6.2661e-05
SuperEnhancer_Hnisz.extend.500.bedL2_0	0.170383	0.412835	0.0588751	2.42299	0.345546	9.81926e-06	-3.37872e-08	8.33879e-08	-0.405182	0.00010212
TFBS_ENCODE.bedL2_0	0.131228	0.728555	0.235841	5.55182	1.79719	0.0127745	2.4209e-08	2.00141e-08	1.20959	0.0421666
TFBS_ENCODE.extend.500.bedL2_0	0.341215	0.732436	0.171313	2.14656	0.502069	0.0282863	-7.32967e-10	9.06088e-09	-0.0808936	0.0786153
Transcribed_Hoffman.bedL2_0	0.345968	0.346307	0.173624	1.00098	0.501851	0.998432	-2.18252e-09	7.06065e-09	-0.30911	0.998432
Transcribed_Hoffman.extend.500.bedL2_0	0.762095	0.625742	0.124785	0.821082	0.163739	0.286903	-1.62002e-09	5.72676e-09	-0.282886	0.420446
TSS_Hoffman.bedL2_0	0.0178321	0.145234	0.0807104	8.1445	4.52613	0.113183	1.83928e-08	5.15351e-08	0.356899	0.210197
TSS_Hoffman.extend.500.bedL2_0	0.0343534	0.176204	0.0823562	5.12915	2.39732	0.0897858	-3.01872e-09	3.38484e-08	-0.0891836	0.172921
UTR_3_UCSC.bedL2_0	0.0111859	0.0835891	0.0501895	7.47271	4.48685	0.157958	-3.88459e-08	6.60181e-08	-0.588412	0.264961
UTR_3_UCSC.extend.500.bedL2_0	0.0264553	0.183819	0.0634689	6.94831	2.3991	0.0129743	2.54182e-08	2.66726e-08	0.95297	0.0421666
UTR_5_UCSC.bedL2_0	0.00548417	0.0305838	0.0392446	5.57675	7.15598	0.526074	1.47637e-08	5.16783e-08	0.285685	0.635722
UTR_5_UCSC.extend.500.bedL2_0	0.0268651	0.0111765	0.0561492	0.416024	2.09004	0.780022	-3.01279e-08	1.88097e-08	-1.60172	0.827779
WeakEnhancer_Hoffman.bedL2_0	0.0209872	0.0689676	0.126253	3.28618	6.01573	0.704176	-3.99235e-09	4.37575e-08	-0.091238	0.779089
WeakEnhancer_Hoffman.extend.500.bedL2_0	0.0887866	0.16405	0.120612	1.84769	1.35845	0.537919	-6.32692e-09	1.50389e-08	-0.420702	0.635722
