# Supplementary material for: Genomic structural equation modeling reveals shared genetic structure of cardiac function and structure-function association studies of CLCNKA mutations
Source: Research Square preprint supplement (doi:10.21203/rs.3.rs-7363435/v1), 2025-09-19
Supplement: Supplementary file 4 [file 1541931bf60f6c1bd7129cba.docx]

Table S4 Model stability evaluation

| chisq | df | p_chisq | AIC | CFI | SRMR |
| --- | --- | --- | --- | --- | --- |
| 19.51 | 9 | 0.02 | 43.51 | 0.92 | 0.15 |
