# Supplementary material for: Genomic structural equation modeling reveals shared genetic structure of cardiac function and structure-function association studies of CLCNKA mutations
Source: Research Square preprint supplement (doi:10.21203/rs.3.rs-7363435/v1), 2025-09-19
Supplement: Supplementary file 5 [file 23284890f00ccb55d0e01345.xlsx]

## Sheet: Sheet1
ensembl	PANEL	ID	FILE	CHR	P0	P1	HSQ	BEST.GWAS.ID	BEST.GWAS.Z	EQTL.ID	EQTL.R2	EQTL.Z	EQTL.GWAS.Z	NSNP	NWGT	MODEL	MODELCV.R2	MODELCV.PV	TWAS.Z	TWAS.P	COLOC.PP0	COLOC.PP1	COLOC.PP2	COLOC.PP3	COLOC.PP4	chr	start_hg38	end_hg38	strand	pip	in_cred_set
ENSG00000162458	sCCA2	FBLIM1	../03.reference/FUSION/sCCA_weights_v8///sCCA2/sCCA2.ENSG00000162458.12.wgt.RDat	1	15756606	15756607	0.0976	rs945425	6.59	rs848209	0.078	5.34	-5.52628	438	1	top1	0.078	4.3e-07	-5.52628	3.27e-08	0	0	0.225	0.505	0.27	1	15756607	15786594	+	1	1
ENSG00000164983	sCCA1	TMEM65	../03.reference/FUSION/sCCA_weights_v8///sCCA1/sCCA1.ENSG00000164983.7.wgt.RDat	8	124372691	124372692	0.4352	rs7461129	5.77	rs6988185	0.411259	-11.41	-2.5935	529	42	enet	0.48	1.5e-44	2.48849	0.0128	0	0.021	0	0.979	0.001	8	124306189	124372692	-	1	1
ENSG00000170873	sCCA2	MTSS1	../03.reference/FUSION/sCCA_weights_v8///sCCA2/sCCA2.ENSG00000170873.18.wgt.RDat	8	124728428	124728429	0.2836	rs7461129	5.77	rs12542527	0.157	-7.07	5.13725	508	1	top1	0.16	3.8e-13	-5.13725	2.79e-07	0	0.001	0	0.051	0.948	8	124550790	124728429	-	1	1
ENSG00000173641	sCCA1	HSPB7	../03.reference/FUSION/sCCA_weights_v8///sCCA1/sCCA1.ENSG00000173641.17.wgt.RDat	1	16019593	16019594	0.4337	rs945425	6.59	rs945419	0.448592	11.9	6.25922	384	44	enet	0.49	2.3e-46	6.60274	4.04e-11	0	0	0	0.011	0.989	1	16014028	16019594	-	1	1
ENSG00000173641	sCCA3	HSPB7	../03.reference/FUSION/sCCA_weights_v8///sCCA3/sCCA3.ENSG00000173641.17.wgt.RDat	1	16019593	16019594	0.2683	rs945425	6.59	rs945416	0.251	-9.34	6.39045	384	4	lasso	0.27	1.6e-22	-6.66743	2.6e-11	0	0	0	0.008	0.992	1	16014028	16019594	-	0.999	1
ENSG00000180228	sCCA2	PRKRA	../03.reference/FUSION/sCCA_weights_v8///sCCA2/sCCA2.ENSG00000180228.12.wgt.RDat	2	178451434	178451435	0.0427	rs2042995	6.37	rs13411588	0.0294	4.11	3.9646	467	7	lasso	0.03	0.0014	5.17658	2.26e-07	0	0	0.098	0.052	0.85	2	178431414	178451435	-	0.998	1
ENSG00000237298	sCCA1	TTN-AS1	../03.reference/FUSION/sCCA_weights_v8///sCCA1/sCCA1.ENSG00000237298.9.wgt.RDat	2	178521182	178521183	0.0727	rs2042995	6.37	rs4894044	0.044108	-4.85	5.3	457	1	top1	0.044	0.00013	-5.29908	1.16e-07	0	0	0.547	0.197	0.256	2	178521183	178779963	+	0.98	1
ENSG00000197771	sCCA2	MCMBP	../03.reference/FUSION/sCCA_weights_v8///sCCA2/sCCA2.ENSG00000197771.12.wgt.RDat	10	119892555	119892556	0.1067	rs2234962	7.69	rs11199152	0.013429	-4.5	2.62735	499	18	enet	0.03	0.0013	-5.11905	3.07e-07	0	0	0.11	0.097	0.792	10	119829404	119892556	-	0.964	1
ENSG00000151929	sCCA3	BAG3	../03.reference/FUSION/sCCA_weights_v8///sCCA3/sCCA3.ENSG00000151929.9.wgt.RDat	10	119651369	119651370	0.132	rs2234962	7.69	rs196328	0.00671	-4.16	-4.28268	481	22	enet	0.021	0.0062	2.94308	0.00325	0	0	0.746	0.116	0.138	10	119651370	119677819	+	0.927	1
ENSG00000170482	sCCA2	SLC23A1	../03.reference/FUSION/sCCA_weights_v8///sCCA2/sCCA2.ENSG00000170482.16.wgt.RDat	5	139384552	139384553	0.0529	rs11950646	5.693	rs6596475	0.0192	4.17	5.16868	271	5	enet	0.037	0.00046	4.43497	9.21e-06	0.001	0	0.092	0.03	0.877	5	139367196	139384553	-	0.897	1
ENSG00000079150	sCCA3	FKBP7	../03.reference/FUSION/sCCA_weights_v8///sCCA3/sCCA3.ENSG00000079150.17.wgt.RDat	2	178478599	178478600	0.418	rs2042995	6.37	rs6704545	0.409	-11.71	3.93	463	34	enet	0.48	3.9e-45	-3.53	0.000411	0	0.001	0	0.997	0.003	2	178463664	178478600	-	0.872	1
ENSG00000170469	sCCA1	SPATA24	../03.reference/FUSION/sCCA_weights_v8///sCCA1/sCCA1.ENSG00000170469.10.wgt.RDat	5	139404087	139404088	0.3246	rs11950646	5.693	rs10900862	0.291325	-10.03	5.52778	273	28	enet	0.33	6.9e-29	-5.59939	2.15e-08	0	0	0	0.012	0.988	5	139396563	139404088	-	0.808	1
ENSG00000134779	sCCA1	TPGS2	../03.reference/FUSION/sCCA_weights_v8///sCCA1/sCCA1.ENSG00000134779.14.wgt.RDat	18	36829215	36829216	0.6407	rs2644261	6.23	rs2046471	0.54792	13.1	4.1305	434	39	enet	0.67	1.9e-74	3.8569	0.000115	0	0.001	0	0.989	0.01	18	36777647	36829216	-	0.752	1
ENSG00000228672	sCCA3	PROB1	../03.reference/FUSION/sCCA_weights_v8///sCCA3/sCCA3.ENSG00000228672.3.wgt.RDat	5	139395712	139395713	0.135	rs11950646	5.693	rs10900862	0.12	-6.6	5.52778	272	1	top1	0.12	3.1e-10	-5.52778	3.24e-08	0	0	0	0.012	0.987	5	139390592	139395713	-	0.615	1
ENSG00000156831	sCCA3	NSMCE2	../03.reference/FUSION/sCCA_weights_v8///sCCA3/sCCA3.ENSG00000156831.7.wgt.RDat	8	125091840	125091841	0.0924	rs7461129	5.77	rs7464057	0.045709	-4.69	-2.63375	489	1	top1	0.046	9.9e-05	2.63375	0.008445	0.016	0.004	0.773	0.169	0.039	8	125091841	125367120	+	0.566	1
ENSG00000134779	sCCA3	TPGS2	../03.reference/FUSION/sCCA_weights_v8///sCCA3/sCCA3.ENSG00000134779.14.wgt.RDat	18	36829215	36829216	0.6769	rs2644261	6.23	rs2046471	0.48831	-12.39	4.1305	434	43	enet	0.66	1.1e-73	-3.5417	0.000397	0	0.001	0	0.989	0.01	18	36777647	36829216	-	0.542	1
ENSG00000148908	sCCA2	RGS10	../03.reference/FUSION/sCCA_weights_v8///sCCA2/sCCA2.ENSG00000148908.14.wgt.RDat	10	119542707	119542708	0.0928	rs2234962	7.69	rs3808954	0.078737	5.05	-1.87177	460	1	top1	0.079	3.8e-07	-1.87177	0.0612	NA	NA	NA	NA	NA	10	119499828	119542708	-	0.531	1
ENSG00000151923	sCCA2	TIAL1	../03.reference/FUSION/sCCA_weights_v8///sCCA2/sCCA2.ENSG00000151923.17.wgt.RDat	10	119597028	119597029	0.1062	rs2234962	7.69	rs12569630	0.017602	4.48	-3.20596	471	18	enet	0.025	0.003	-5.15694	2.51e-07	0	0	0.515	0.267	0.218	10	119571802	119597029	-	0.522	1
ENSG00000164983	sCCA3	TMEM65	../03.reference/FUSION/sCCA_weights_v8///sCCA3/sCCA3.ENSG00000164983.7.wgt.RDat	8	124372691	124372692	0.1851	rs7461129	5.77	rs10089507	0.103347	-6.18	-1.58454	529	40	enet	0.14	4.3e-12	2.40568	0.016142	0	0.021	0.002	0.977	0	8	124306189	124372692	-	0.496	1
ENSG00000150477	sCCA3	KIAA1328	../03.reference/FUSION/sCCA_weights_v8///sCCA3/sCCA3.ENSG00000150477.14.wgt.RDat	18	36829239	36829240	0.0754	rs2644261	6.23	rs11665085	0.02473	3.96	-1.5034	434	1	top1	0.025	0.0034	-1.5034	0.13273	NA	NA	NA	NA	NA	18	36829240	37232172	+	0.39	1
ENSG00000134779	sCCA2	TPGS2	../03.reference/FUSION/sCCA_weights_v8///sCCA2/sCCA2.ENSG00000134779.14.wgt.RDat	18	36829215	36829216	0.5077	rs2644261	6.23	rs10502670	0.478	12.11	4.1305	434	14	lasso	0.53	3.7e-52	4.11614	3.85e-05	0	0.001	0	0.989	0.01	18	36777647	36829216	-	0.361	1
ENSG00000170482	sCCA3	SLC23A1	../03.reference/FUSION/sCCA_weights_v8///sCCA3/sCCA3.ENSG00000170482.16.wgt.RDat	5	139384552	139384553	0.1101	rs11950646	5.693	rs10063949	0.0854	-5.86	5.57705	271	15	enet	0.091	4.4e-08	-5.55691	2.75e-08	0	0	0	0.014	0.986	5	139367196	139384553	-	0.226	1
ENSG00000151923	sCCA1	TIAL1	../03.reference/FUSION/sCCA_weights_v8///sCCA1/sCCA1.ENSG00000151923.17.wgt.RDat	10	119597028	119597029	0.1311	rs2234962	7.69	rs12569630	0.136737	-6.64	-3.20596	471	10	enet	0.17	8.4e-14	1.84542	0.06498	NA	NA	NA	NA	NA	10	119571802	119597029	-	0.224	1
ENSG00000150477	sCCA1	KIAA1328	../03.reference/FUSION/sCCA_weights_v8///sCCA1/sCCA1.ENSG00000150477.14.wgt.RDat	18	36829239	36829240	0.1088	rs2644261	6.23	rs11663990	0.03829	-5.48	-1.1073	434	14	enet	0.088	8e-08	-0.3116	0.755345	NA	NA	NA	NA	NA	18	36829240	37232172	+	0.188	1
ENSG00000141428	sCCA3	C18orf21	../03.reference/FUSION/sCCA_weights_v8///sCCA3/sCCA3.ENSG00000141428.16.wgt.RDat	18	35972082	35972083	0.1685	rs355305	3.78	rs16966831	0.017689	-4.48	0.491	437	30	enet	0.042	0.00018	-0.9037	0.366161	NA	NA	NA	NA	NA	18	35972083	35979286	+	0.175	1
ENSG00000170469	sCCA3	SPATA24	../03.reference/FUSION/sCCA_weights_v8///sCCA3/sCCA3.ENSG00000170469.10.wgt.RDat	5	139404087	139404088	0.0829	rs11950646	5.693	rs4075682	0.0897	5.64	5.48698	273	1	top1	0.09	5.8e-08	5.48698	4.09e-08	0	0	0.002	0.016	0.982	5	139396563	139404088	-	0.171	1
ENSG00000116095	sCCA1	PLEKHA3	../03.reference/FUSION/sCCA_weights_v8///sCCA1/sCCA1.ENSG00000116095.10.wgt.RDat	2	178480467	178480468	0.2804	rs2042995	6.37	rs3769866	0.132055	7.54	4.84	464	22	enet	0.18	2.9e-15	4.68006	2.87e-06	0	0.001	0	0.902	0.098	2	178480468	178516462	+	0.155	1
ENSG00000245149	sCCA2	RNF139-AS1	../03.reference/FUSION/sCCA_weights_v8///sCCA2/sCCA2.ENSG00000245149.3.wgt.RDat	8	124474575	124474576	0.1676	rs7461129	5.77	rs13264071	0.0854	-6.37	-0.257806	520	20	enet	0.14	4.6e-12	0.57107	0.568	NA	NA	NA	NA	NA	8	124462485	124474576	-	0.138	1
ENSG00000134759	sCCA2	ELP2	../03.reference/FUSION/sCCA_weights_v8///sCCA2/sCCA2.ENSG00000134759.13.wgt.RDat	18	36129443	36129444	0.4351	rs2848907	5.56	rs610492	0.499	-12.43	-0.12864	494	43	enet	0.5	4.3e-48	0.29838	0.765	NA	NA	NA	NA	NA	18	36129444	36180556	+	0.137	1
ENSG00000141424	sCCA3	SLC39A6	../03.reference/FUSION/sCCA_weights_v8///sCCA3/sCCA3.ENSG00000141424.12.wgt.RDat	18	36129384	36129385	0.132	rs2848907	5.56	rs6507176	0.001226	-4.07	-0.604	494	29	enet	0.073	9.6e-07	-0.115	0.908475	NA	NA	NA	NA	NA	18	36108532	36129385	-	0.113	0
ENSG00000170482	sCCA1	SLC23A1	../03.reference/FUSION/sCCA_weights_v8///sCCA1/sCCA1.ENSG00000170482.16.wgt.RDat	5	139384552	139384553	0.3622	rs11950646	5.693	rs6596475	0.377615	-10.9	5.16868	271	16	enet	0.39	1.3e-34	-5.45074	5.02e-08	0	0	0	0.026	0.974	5	139367196	139384553	-	0.113	1
ENSG00000180938	sCCA3	ZNF572	../03.reference/FUSION/sCCA_weights_v8///sCCA3/sCCA3.ENSG00000180938.5.wgt.RDat	8	124973297	124973298	0.1284	rs7461129	5.77	rs7846270	-0.002039	3.39	0.32412	507	58	enet	-0.00082	0.39	-1.60655	0.108153	NA	NA	NA	NA	NA	8	124973298	124979389	+	0.0918	1
ENSG00000228672	sCCA1	PROB1	../03.reference/FUSION/sCCA_weights_v8///sCCA1/sCCA1.ENSG00000228672.3.wgt.RDat	5	139395712	139395713	0.3867	rs11950646	5.693	rs11242465	0.417575	11.58	5.19556	272	6	lasso	0.45	3e-41	5.66728	1.45e-08	0	0	0	0.044	0.956	5	139390592	139395713	-	0.0897	1
ENSG00000107651	sCCA3	SEC23IP	../03.reference/FUSION/sCCA_weights_v8///sCCA3/sCCA3.ENSG00000107651.12.wgt.RDat	10	119892710	119892711	0.1973	rs2234962	7.69	rs12241478	0.0203	5.03	-2.70993	499	30	enet	0.056	1.7e-05	-1.43527	0.151	NA	NA	NA	NA	NA	10	119892711	119944658	+	0.083	1
ENSG00000170464	sCCA2	DNAJC18	../03.reference/FUSION/sCCA_weights_v8///sCCA2/sCCA2.ENSG00000170464.9.wgt.RDat	5	139444490	139444491	0.2265	rs11950646	5.693	rs11242465	0.268	-9.1	5.19249	270	1	top1	0.27	1.7e-22	-5.19249	2.07e-07	0	0.001	0	0.074	0.925	5	139408588	139444491	-	0.0752	1
ENSG00000156831	sCCA1	NSMCE2	../03.reference/FUSION/sCCA_weights_v8///sCCA1/sCCA1.ENSG00000156831.7.wgt.RDat	8	125091840	125091841	0.1108	rs7461129	5.77	rs10094316	0.100927	-5.68	-1.03992	489	1	top1	0.1	8.4e-09	1.03992	0.298	NA	NA	NA	NA	NA	8	125091841	125367120	+	0.066	1
ENSG00000104549	sCCA2	SQLE	../03.reference/FUSION/sCCA_weights_v8///sCCA2/sCCA2.ENSG00000104549.11.wgt.RDat	8	124998496	124998497	0.1197	rs7461129	5.77	rs7822592	0.0602	-4.85	-1.78858	514	15	enet	0.073	9.5e-07	1.54819	0.122	NA	NA	NA	NA	NA	8	124998497	125022283	+	0.0629	1
ENSG00000116809	sCCA2	ZBTB17	../03.reference/FUSION/sCCA_weights_v8///sCCA2/sCCA2.ENSG00000116809.11.wgt.RDat	1	15976131	15976132	0.117	rs945425	6.59	rs1739836	-0.00119	4.08	3.01471	403	18	enet	0.0065	0.084	1.87807	0.0604	NA	NA	NA	NA	NA	1	15941869	15976132	-	0.0569	1
ENSG00000197771	sCCA1	MCMBP	../03.reference/FUSION/sCCA_weights_v8///sCCA1/sCCA1.ENSG00000197771.12.wgt.RDat	10	119892555	119892556	0.1011	rs2234962	7.69	rs196214	0.042101	5.61	0.71432	499	22	enet	0.058	1.3e-05	1.00821	0.31335	NA	NA	NA	NA	NA	10	119829404	119892556	-	0.0531	1
ENSG00000164961	sCCA1	WASHC5	../03.reference/FUSION/sCCA_weights_v8///sCCA1/sCCA1.ENSG00000164961.15.wgt.RDat	8	125091677	125091678	0.1044	rs7461129	5.77	rs17396442	0.048139	4.64	-0.78642	489	1	top1	0.048	6.6e-05	-0.786416	0.432	NA	NA	NA	NA	NA	8	125024260	125091678	-	0.0514	1
ENSG00000170873	sCCA1	MTSS1	../03.reference/FUSION/sCCA_weights_v8///sCCA1/sCCA1.ENSG00000170873.18.wgt.RDat	8	124728428	124728429	0.209	rs7461129	5.77	rs6470261	0.059743	-5.97	-0.21864	508	12	lasso	0.12	6.2e-10	0.120693	0.904	NA	NA	NA	NA	NA	8	124550790	124728429	-	0.0513	1
ENSG00000150477	sCCA2	KIAA1328	../03.reference/FUSION/sCCA_weights_v8///sCCA2/sCCA2.ENSG00000150477.14.wgt.RDat	18	36829239	36829240	0.123	rs2644261	6.23	rs7239554	0.0357	-5.2	-1.30333	434	56	enet	0.048	6.3e-05	1.02806	0.304	NA	NA	NA	NA	NA	18	36829240	37232172	+	0.0507	1
ENSG00000170873	sCCA3	MTSS1	../03.reference/FUSION/sCCA_weights_v8///sCCA3/sCCA3.ENSG00000170873.18.wgt.RDat	8	124728428	124728429	0.1675	rs7461129	5.77	rs7006401	0.007887	4.38	-0.33259	508	47	enet	0.12	4.8e-10	0.277539	0.781367	NA	NA	NA	NA	NA	8	124550790	124728429	-	0.0506	1
ENSG00000147684	sCCA3	NDUFB9	../03.reference/FUSION/sCCA_weights_v8///sCCA3/sCCA3.ENSG00000147684.7.wgt.RDat	8	124543086	124543087	0.1041	rs7461129	5.77	rs3829037	0.027792	-4.05	-2.1137	522	2	lasso	0.05	4.9e-05	1.63981	0.101045	NA	NA	NA	NA	NA	8	124543087	124568378	+	0.05	0
ENSG00000104549	sCCA3	SQLE	../03.reference/FUSION/sCCA_weights_v8///sCCA3/sCCA3.ENSG00000104549.11.wgt.RDat	8	124998496	124998497	0.1439	rs7461129	5.77	rs2303523	0.065121	-5.1	-0.49363	514	1	top1	0.065	3.8e-06	0.493635	0.621564	NA	NA	NA	NA	NA	8	124998497	125022283	+	0.0488	0
ENSG00000079150	sCCA1	FKBP7	../03.reference/FUSION/sCCA_weights_v8///sCCA1/sCCA1.ENSG00000079150.17.wgt.RDat	2	178478599	178478600	0.3988	rs2042995	6.37	rs6704545	0.403193	-11.75	3.93	463	29	enet	0.48	6.8e-45	-3.89365	9.87e-05	0	0.001	0	0.997	0.003	2	178463664	178478600	-	0.047	1
ENSG00000185129	sCCA3	PURA	../03.reference/FUSION/sCCA_weights_v8///sCCA3/sCCA3.ENSG00000185129.5.wgt.RDat	5	140107776	140107777	0.0653	rs13188297	3.058	rs6871703	0.0488	-4.17	-0.070265	283	2	lasso	0.061	7.7e-06	-0.594581	0.552	NA	NA	NA	NA	NA	5	140107777	140125619	+	0.0469	1
ENSG00000141424	sCCA2	SLC39A6	../03.reference/FUSION/sCCA_weights_v8///sCCA2/sCCA2.ENSG00000141424.12.wgt.RDat	18	36129384	36129385	0.065	rs2848907	5.56	rs1626427	-5.45e-05	3.88	-0.00624	494	29	enet	0.0098	0.046	-0.23939	0.811	NA	NA	NA	NA	NA	18	36108532	36129385	-	0.0467	0
ENSG00000156831	sCCA2	NSMCE2	../03.reference/FUSION/sCCA_weights_v8///sCCA2/sCCA2.ENSG00000156831.7.wgt.RDat	8	125091840	125091841	0.1067	rs7461129	5.77	rs16900461	0.0144	-4.2	-0.662374	489	3	lasso	0.02	0.0081	-0.09233	0.926	NA	NA	NA	NA	NA	8	125091841	125367120	+	0.0467	1
ENSG00000187231	sCCA3	SESTD1	../03.reference/FUSION/sCCA_weights_v8///sCCA3/sCCA3.ENSG00000187231.13.wgt.RDat	2	179264789	179264790	0.1517	rs2291313	6.01	rs6708300	0.00318	-4.25	2.25	511	15	enet	0.037	0.00039	-1.86	0.062317	NA	NA	NA	NA	NA	2	179101692	179264790	-	0.0446	1
ENSG00000141428	sCCA2	C18orf21	../03.reference/FUSION/sCCA_weights_v8///sCCA2/sCCA2.ENSG00000141428.16.wgt.RDat	18	35972082	35972083	0.1637	rs355305	3.78	rs12709679	0.0399	4.8	0.77612	437	45	enet	0.079	3.8e-07	-0.72496	0.468	NA	NA	NA	NA	NA	18	35972083	35979286	+	0.0425	0
ENSG00000151929	sCCA1	BAG3	../03.reference/FUSION/sCCA_weights_v8///sCCA1/sCCA1.ENSG00000151929.9.wgt.RDat	10	119651369	119651370	0.1669	rs2234962	7.69	rs1008727	0.163364	-7.22	-1.92119	481	1	top1	0.16	1.2e-13	1.92119	0.05471	NA	NA	NA	NA	NA	10	119651370	119677819	+	0.0419	1
ENSG00000180938	sCCA1	ZNF572	../03.reference/FUSION/sCCA_weights_v8///sCCA1/sCCA1.ENSG00000180938.5.wgt.RDat	8	124973297	124973298	0.2258	rs7461129	5.77	rs17406109	0.013269	-4.22	0.63752	507	71	enet	0.03	0.0014	1.01008	0.312	NA	NA	NA	NA	NA	8	124973298	124979389	+	0.0404	1
ENSG00000147684	sCCA1	NDUFB9	../03.reference/FUSION/sCCA_weights_v8///sCCA1/sCCA1.ENSG00000147684.7.wgt.RDat	8	124543086	124543087	0.2462	rs7461129	5.77	rs7010902	0.150958	-7.78	-0.10459	522	33	enet	0.2	5.7e-17	1.40104	0.161	NA	NA	NA	NA	NA	8	124543087	124568378	+	0.0402	0
ENSG00000141424	sCCA1	SLC39A6	../03.reference/FUSION/sCCA_weights_v8///sCCA1/sCCA1.ENSG00000141424.12.wgt.RDat	18	36129384	36129385	0.2623	rs2848907	5.56	rs8299	0.19175	8.31	-0.12819	494	35	enet	0.23	3.4e-19	0.52	0.603049	NA	NA	NA	NA	NA	18	36108532	36129385	-	0.0388	0
ENSG00000104549	sCCA1	SQLE	../03.reference/FUSION/sCCA_weights_v8///sCCA1/sCCA1.ENSG00000104549.11.wgt.RDat	8	124998496	124998497	0.1351	rs7461129	5.77	rs2303523	0.092095	-6.06	-0.49363	514	20	enet	0.1	5.8e-09	1.32238	0.186	NA	NA	NA	NA	NA	8	124998497	125022283	+	0.0383	0
ENSG00000079150	sCCA2	FKBP7	../03.reference/FUSION/sCCA_weights_v8///sCCA2/sCCA2.ENSG00000079150.17.wgt.RDat	2	178478599	178478600	0.3671	rs2042995	6.37	rs2288320	0.209	8.54	3.05522	463	43	enet	0.29	2.6e-24	1.70641	0.0879	NA	NA	NA	NA	NA	2	178463664	178478600	-	0.0377	1
ENSG00000170881	sCCA2	RNF139	../03.reference/FUSION/sCCA_weights_v8///sCCA2/sCCA2.ENSG00000170881.4.wgt.RDat	8	124474737	124474738	0.1287	rs7461129	5.77	rs17299208	0.0298	4.68	0.531979	520	29	enet	0.035	0.0006	-1.47926	0.139	NA	NA	NA	NA	NA	8	124474738	124487914	+	0.0368	1
ENSG00000164961	sCCA2	WASHC5	../03.reference/FUSION/sCCA_weights_v8///sCCA2/sCCA2.ENSG00000164961.15.wgt.RDat	8	125091677	125091678	0.1113	rs7461129	5.77	rs16900217	0.0593	-5.7	-0.327983	489	4	lasso	0.068	2.4e-06	0.35479	0.723	NA	NA	NA	NA	NA	8	125024260	125091678	-	0.0366	0
ENSG00000183665	sCCA2	TRMT12	../03.reference/FUSION/sCCA_weights_v8///sCCA2/sCCA2.ENSG00000183665.5.wgt.RDat	8	124450819	124450820	0.1938	rs7461129	5.77	rs4132855	0.145	-7.51	-0.169657	521	30	enet	0.2	9.3e-17	0.02141	0.983	NA	NA	NA	NA	NA	8	124450820	124462150	+	0.0366	0
ENSG00000228672	sCCA2	PROB1	../03.reference/FUSION/sCCA_weights_v8///sCCA2/sCCA2.ENSG00000228672.3.wgt.RDat	5	139395712	139395713	0.2765	rs11950646	5.693	rs11242465	0.332	10.12	5.19556	272	5	lasso	0.35	5.2e-30	5.51395	3.51e-08	0	0.001	0	0.072	0.927	5	139390592	139395713	-	0.0365	1
ENSG00000141425	sCCA1	RPRD1A	../03.reference/FUSION/sCCA_weights_v8///sCCA1/sCCA1.ENSG00000141425.17.wgt.RDat	18	36067575	36067576	0.2234	rs11877288	3.38	rs9961867	0.23047	-8.66	0.10683	460	4	lasso	0.24	1.2e-19	0.0366	0.970836	NA	NA	NA	NA	NA	18	35984387	36067576	-	0.0359	0
ENSG00000147687	sCCA1	TATDN1	../03.reference/FUSION/sCCA_weights_v8///sCCA1/sCCA1.ENSG00000147687.18.wgt.RDat	8	124539457	124539458	0.2377	rs7461129	5.77	rs16899786	0.05809	6.39	-1.0046	524	37	enet	0.22	5.5e-18	-1.61864	0.106	NA	NA	NA	NA	NA	8	124488485	124539458	-	0.0357	0
ENSG00000147684	sCCA2	NDUFB9	../03.reference/FUSION/sCCA_weights_v8///sCCA2/sCCA2.ENSG00000147684.7.wgt.RDat	8	124543086	124543087	0.1547	rs7461129	5.77	rs3829037	0.016	-4.87	-2.1137	522	41	enet	0.069	2.1e-06	1.83906	0.0659	NA	NA	NA	NA	NA	8	124543087	124568378	+	0.034	0
ENSG00000155636	sCCA2	RBM45	../03.reference/FUSION/sCCA_weights_v8///sCCA2/sCCA2.ENSG00000155636.14.wgt.RDat	2	178112454	178112455	0.1414	rs16866400	5.72	rs2366366	0.116	-6.37	0.9628	474	1	top1	0.12	6.2e-10	-0.9628	0.336	NA	NA	NA	NA	NA	2	178112455	178139011	+	0.0337	1
ENSG00000198825	sCCA1	INPP5F	../03.reference/FUSION/sCCA_weights_v8///sCCA1/sCCA1.ENSG00000198825.12.wgt.RDat	10	119726096	119726097	0.258	rs2234962	7.69	rs12771828	0.12042	-7.59	-2.19541	499	41	enet	0.28	8.9e-24	1.91606	0.05536	NA	NA	NA	NA	NA	10	119726097	119829278	+	0.0321	1
ENSG00000237938	sCCA3	RP11-288I21.1	../03.reference/FUSION/sCCA_weights_v8///sCCA3/sCCA3.ENSG00000237938.5.wgt.RDat	1	15736895	15736896	0.1719	rs945425	6.59	rs10927831	0.112	6.18	-0.678184	444	33	enet	0.13	9.3e-11	1.92909	0.0537	NA	NA	NA	NA	NA	1	15720312	15736896	-	0.0316	1
ENSG00000015479	sCCA2	MATR3	../03.reference/FUSION/sCCA_weights_v8///sCCA2/sCCA2.ENSG00000015479.18.wgt.RDat	5	139293647	139293648	0.1963	rs11950646	5.693	rs12187474	0.000868	-4.36	4.45958	264	6	lasso	0.044	0.00014	-3.65684	0.000255	0.005	0.002	0.446	0.194	0.354	5	139293648	139331677	+	0.0275	1
ENSG00000107651	sCCA2	SEC23IP	../03.reference/FUSION/sCCA_weights_v8///sCCA2/sCCA2.ENSG00000107651.12.wgt.RDat	10	119892710	119892711	0.1342	rs2234962	7.69	rs4445563	0.082649	5.72	-1.53534	499	4	lasso	0.085	1.3e-07	-2.22022	0.0264	0	0	0.008	0.991	0	10	119892711	119944658	+	0.0268	0
ENSG00000170469	sCCA2	SPATA24	../03.reference/FUSION/sCCA_weights_v8///sCCA2/sCCA2.ENSG00000170469.10.wgt.RDat	5	139404087	139404088	0.2387	rs11950646	5.693	rs10900862	0.116	6.54	5.52778	273	11	lasso	0.17	5.1e-14	4.16624	3.1e-05	0	0	0	0.012	0.988	5	139396563	139404088	-	0.0262	0
ENSG00000187231	sCCA1	SESTD1	../03.reference/FUSION/sCCA_weights_v8///sCCA1/sCCA1.ENSG00000187231.13.wgt.RDat	2	179264789	179264790	0.2525	rs2291313	6.01	rs10209887	0.220121	8.25	-0.811	511	25	enet	0.23	1.7e-19	-0.374502	0.708	NA	NA	NA	NA	NA	2	179101692	179264790	-	0.0258	0
ENSG00000165672	sCCA3	PRDX3	../03.reference/FUSION/sCCA_weights_v8///sCCA3/sCCA3.ENSG00000165672.6.wgt.RDat	10	119178832	119178833	0.1367	rs2234962	7.69	rs3009877	0.0597	4.83	-2.30731	492	10	lasso	0.066	3.2e-06	-2.05622	0.0398	0	0	0.371	0.599	0.031	10	119167703	119178833	-	0.0234	1
ENSG00000148908	sCCA3	RGS10	../03.reference/FUSION/sCCA_weights_v8///sCCA3/sCCA3.ENSG00000148908.14.wgt.RDat	10	119542707	119542708	0.1365	rs2234962	7.69	rs7096728	0.0419	-4.4	1.10076	460	36	enet	0.047	8.6e-05	-1.47054	0.141	NA	NA	NA	NA	NA	10	119499828	119542708	-	0.0227	0
ENSG00000223960	sCCA2	AC009948.5	../03.reference/FUSION/sCCA_weights_v8///sCCA2/sCCA2.ENSG00000223960.6.wgt.RDat	2	178413938	178413939	0.1225	rs2042995	6.37	rs3731758	0.0512	-5.01	3.72248	471	7	lasso	0.053	3e-05	-4.02983	5.58e-05	0	0	0.219	0.724	0.056	2	178413939	178440243	+	0.0226	0
ENSG00000152377	sCCA3	SPOCK1	../03.reference/FUSION/sCCA_weights_v8///sCCA3/sCCA3.ENSG00000152377.13.wgt.RDat	5	137598378	137598379	0.1936	rs7720059	3.289	rs1989916	0.12	-6.55	-0.7226	412	1	top1	0.12	3.1e-10	0.7226	0.47	NA	NA	NA	NA	NA	5	136975298	137598379	-	0.0219	0
ENSG00000119979	sCCA2	FAM45A	../03.reference/FUSION/sCCA_weights_v8///sCCA2/sCCA2.ENSG00000119979.16.wgt.RDat	10	119104091	119104092	0.145	rs3009892	3.32	rs10886471	0.093071	5.48	0.78084	481	1	top1	0.093	3.3e-08	0.78084	0.435	NA	NA	NA	NA	NA	10	119104092	119137984	+	0.0215	0
ENSG00000107651	sCCA1	SEC23IP	../03.reference/FUSION/sCCA_weights_v8///sCCA1/sCCA1.ENSG00000107651.12.wgt.RDat	10	119892710	119892711	0.3644	rs2234962	7.69	rs2901218	0.205343	8.02	-2.03597	499	9	lasso	0.22	2.6e-18	-1.13488	0.25642	NA	NA	NA	NA	NA	10	119892711	119944658	+	0.0208	0
ENSG00000163510	sCCA3	CWC22	../03.reference/FUSION/sCCA_weights_v8///sCCA3/sCCA3.ENSG00000163510.13.wgt.RDat	2	180007112	180007113	0.0897	rs7594895	-2.86	rs356407	0.003	3.96	-1.85	515	38	enet	0.01	0.043	-1.34	0.180687	NA	NA	NA	NA	NA	2	179944876	180007113	-	0.0207	1
ENSG00000196659	sCCA3	TTC30B	../03.reference/FUSION/sCCA_weights_v8///sCCA3/sCCA3.ENSG00000196659.9.wgt.RDat	2	177553013	177553014	0.1345	rs2364847	2.68	rs4368367	0.0222	-4.59	-1.18	437	26	enet	0.048	6.8e-05	1.87	0.060847	NA	NA	NA	NA	NA	2	177548998	177553014	-	0.0203	1
ENSG00000151923	sCCA3	TIAL1	../03.reference/FUSION/sCCA_weights_v8///sCCA3/sCCA3.ENSG00000151923.17.wgt.RDat	10	119597028	119597029	0.0954	rs2234962	7.69	rs17099318	-0.00325	3.46	-1.56589	471	22	enet	-0.0028	0.7	-1.94296	0.052	NA	NA	NA	NA	NA	10	119571802	119597029	-	0.0201	0
ENSG00000163510	sCCA2	CWC22	../03.reference/FUSION/sCCA_weights_v8///sCCA2/sCCA2.ENSG00000163510.13.wgt.RDat	2	180007112	180007113	0.1408	rs7594895	-2.86	rs1518432	0.0514	-4.7	1.31524	515	13	enet	0.1	1e-08	-1.02082	0.307	NA	NA	NA	NA	NA	2	179944876	180007113	-	0.0198	0
ENSG00000204311	sCCA1	DFNB59	../03.reference/FUSION/sCCA_weights_v8///sCCA1/sCCA1.ENSG00000204311.12.wgt.RDat	2	178451512	178451513	0.2607	rs2042995	6.37	rs17362588	0.085992	5.58	-0.778	467	71	enet	0.15	2.7e-12	0.022846	0.982	NA	NA	NA	NA	NA	2	178451513	178461390	+	0.019	0
ENSG00000249751	sCCA3	ECSCR	../03.reference/FUSION/sCCA_weights_v8///sCCA3/sCCA3.ENSG00000249751.3.wgt.RDat	5	139462742	139462743	0.1197	rs11950646	5.693	rs1422187	0.00577	3.67	2.19599	272	34	enet	0.014	0.021	-1.33006	0.183	NA	NA	NA	NA	NA	5	139448556	139462743	-	0.0183	0
ENSG00000171604	sCCA1	CXXC5	../03.reference/FUSION/sCCA_weights_v8///sCCA1/sCCA1.ENSG00000171604.11.wgt.RDat	5	139647298	139647299	0.1652	rs11950646	5.693	rs3822742	0.145632	6.83	1.40372	253	1	top1	0.15	3.1e-12	1.40372	0.16	NA	NA	NA	NA	NA	5	139647299	139683882	+	0.018	0
ENSG00000120306	sCCA2	CYSTM1	../03.reference/FUSION/sCCA_weights_v8///sCCA2/sCCA2.ENSG00000120306.9.wgt.RDat	5	140174641	140174642	0.1627	rs13188297	3.15	rs269782	0.133	6.59	0.259366	301	1	top1	0.13	2.9e-11	0.259366	0.795	NA	NA	NA	NA	NA	5	140174642	140282052	+	0.0174	0
ENSG00000198873	sCCA2	GRK5	../03.reference/FUSION/sCCA_weights_v8///sCCA2/sCCA2.ENSG00000198873.11.wgt.RDat	10	119207588	119207589	0.0864	rs2234962	7.69	rs915119	0.009926	-4.47	-0.40497	496	7	enet	0.041	0.00021	0.94844	0.343	NA	NA	NA	NA	NA	10	119207589	119455619	+	0.0174	0
ENSG00000171604	sCCA2	CXXC5	../03.reference/FUSION/sCCA_weights_v8///sCCA2/sCCA2.ENSG00000171604.11.wgt.RDat	5	139647298	139647299	0.0552	rs11950646	5.693	rs10900859	0.00224	4.03	-2.53496	253	1	top1	0.0022	0.2	-2.53496	0.0112	0.009	0	0.913	0.032	0.046	5	139647299	139683882	+	0.016	0
ENSG00000198825	sCCA2	INPP5F	../03.reference/FUSION/sCCA_weights_v8///sCCA2/sCCA2.ENSG00000198825.12.wgt.RDat	10	119726096	119726097	0.183	rs2234962	7.69	rs1008727	0.073864	6.39	-1.92119	499	15	enet	0.12	1.5e-10	-1.56494	0.118	NA	NA	NA	NA	NA	10	119726097	119829278	+	0.0151	0
ENSG00000220842	sCCA3	RPL21P16	../03.reference/FUSION/sCCA_weights_v8///sCCA3/sCCA3.ENSG00000220842.6.wgt.RDat	10	120355182	120355183	0.0949	rs11199112	4.11	rs12241478	0.00451	3.84	-2.70993	592	31	enet	0.0047	0.12	-1.66761	0.0954	NA	NA	NA	NA	NA	10	120354701	120355183	-	0.0148	0
ENSG00000198825	sCCA3	INPP5F	../03.reference/FUSION/sCCA_weights_v8///sCCA3/sCCA3.ENSG00000198825.12.wgt.RDat	10	119726096	119726097	0.1729	rs2234962	7.69	rs2475321	0.0992	-6.78	-1.18192	499	23	enet	0.15	1.7e-12	0.30402	0.761	NA	NA	NA	NA	NA	10	119726097	119829278	+	0.0147	0
ENSG00000155636	sCCA3	RBM45	../03.reference/FUSION/sCCA_weights_v8///sCCA3/sCCA3.ENSG00000155636.14.wgt.RDat	2	178112454	178112455	0.1953	rs16866400	5.72	rs334065	0.00941	5	-0.699	474	7	lasso	0.099	1.1e-08	-0.608	0.543332	NA	NA	NA	NA	NA	2	178112455	178139011	+	0.0146	0
ENSG00000113068	sCCA2	PFDN1	../03.reference/FUSION/sCCA_weights_v8///sCCA2/sCCA2.ENSG00000113068.9.wgt.RDat	5	140303120	140303121	0.3724	rs13188297	2.88	rs4912707	0.392	-11.35	0.215759	307	34	enet	0.39	7.7e-35	0.142373	0.887	NA	NA	NA	NA	NA	5	140245039	140303121	-	0.0143	0
ENSG00000148908	sCCA1	RGS10	../03.reference/FUSION/sCCA_weights_v8///sCCA1/sCCA1.ENSG00000148908.14.wgt.RDat	10	119542707	119542708	0.2145	rs2234962	7.69	rs11198995	0.040836	-5.55	-0.66598	460	26	enet	0.18	8.7e-15	-0.74959	0.4535	NA	NA	NA	NA	NA	10	119499828	119542708	-	0.0141	0
ENSG00000187231	sCCA2	SESTD1	../03.reference/FUSION/sCCA_weights_v8///sCCA2/sCCA2.ENSG00000187231.13.wgt.RDat	2	179264789	179264790	0.2108	rs2291313	6.01	rs4894082	0.112	6.08	0.49679	511	19	enet	0.12	2.9e-10	0.83291	0.405	NA	NA	NA	NA	NA	2	179101692	179264790	-	0.0141	0
ENSG00000223960	sCCA3	AC009948.5	../03.reference/FUSION/sCCA_weights_v8///sCCA3/sCCA3.ENSG00000223960.6.wgt.RDat	2	178413938	178413939	0.2637	rs2042995	6.37	rs3731758	0.127	-6.55	3.72	471	42	enet	0.18	4.6e-15	-2.43	0.014924	0	0.001	0	0.998	0.001	2	178413939	178440243	+	0.014	0
ENSG00000107581	sCCA1	EIF3A	../03.reference/FUSION/sCCA_weights_v8///sCCA1/sCCA1.ENSG00000107581.12.wgt.RDat	10	119080822	119080823	0.0864	rs3009892	3.29	rs876414	0.037633	-3.97	1.50748	488	1	top1	0.038	0.00039	-1.50748	0.13169	NA	NA	NA	NA	NA	10	119033733	119080823	-	0.0138	0
ENSG00000165672	sCCA1	PRDX3	../03.reference/FUSION/sCCA_weights_v8///sCCA1/sCCA1.ENSG00000165672.6.wgt.RDat	10	119178832	119178833	0.3491	rs2234962	7.69	rs3377	0.213298	-8.16	0.91862	492	31	enet	0.24	2.4e-20	-1.53105	0.12576	NA	NA	NA	NA	NA	10	119167703	119178833	-	0.013	0
ENSG00000223960	sCCA1	AC009948.5	../03.reference/FUSION/sCCA_weights_v8///sCCA1/sCCA1.ENSG00000223960.6.wgt.RDat	2	178413938	178413939	0.2057	rs2042995	6.37	rs12613303	0.174302	-7.68	2.96	471	1	top1	0.17	1.6e-14	-2.95847	0.00309	0	0.001	0	0.999	0	2	178413939	178440243	+	0.0128	0
ENSG00000119979	sCCA1	FAM45A	../03.reference/FUSION/sCCA_weights_v8///sCCA1/sCCA1.ENSG00000119979.16.wgt.RDat	10	119104091	119104092	0.2619	rs3009892	3.32	rs3802739	0.249368	-9.04	-0.66552	481	8	lasso	0.25	5.6e-21	0.46466	0.64218	NA	NA	NA	NA	NA	10	119104092	119137984	+	0.0127	0
ENSG00000119979	sCCA3	FAM45A	../03.reference/FUSION/sCCA_weights_v8///sCCA3/sCCA3.ENSG00000119979.16.wgt.RDat	10	119104091	119104092	0.1854	rs3009892	3.32	rs10787919	0.101	5.91	-0.59671	481	11	lasso	0.11	3.3e-09	-0.50884	0.611	NA	NA	NA	NA	NA	10	119104092	119137984	+	0.0125	0
ENSG00000113068	sCCA1	PFDN1	../03.reference/FUSION/sCCA_weights_v8///sCCA1/sCCA1.ENSG00000113068.9.wgt.RDat	5	140303120	140303121	0.5216	rs13188297	2.88	rs4912707	0.653906	14.26	0.215759	307	44	enet	0.65	4.3e-72	0.04461	0.964	NA	NA	NA	NA	NA	5	140245039	140303121	-	0.0124	0
ENSG00000155636	sCCA1	RBM45	../03.reference/FUSION/sCCA_weights_v8///sCCA1/sCCA1.ENSG00000155636.14.wgt.RDat	2	178112454	178112455	0.1598	rs16866400	5.72	rs16866111	0.102645	6.01	0.49	474	36	enet	0.13	3.5e-11	0.470149	0.638	NA	NA	NA	NA	NA	2	178112455	178139011	+	0.0121	0
ENSG00000198873	sCCA1	GRK5	../03.reference/FUSION/sCCA_weights_v8///sCCA1/sCCA1.ENSG00000198873.11.wgt.RDat	10	119207588	119207589	0.2082	rs2234962	7.69	rs11198906	0.013802	5.31	-0.06148	496	17	enet	0.13	7.5e-11	-0.09176	0.92689	NA	NA	NA	NA	NA	10	119207589	119455619	+	0.0117	0
ENSG00000204311	sCCA3	DFNB59	../03.reference/FUSION/sCCA_weights_v8///sCCA3/sCCA3.ENSG00000204311.12.wgt.RDat	2	178451512	178451513	0.2206	rs2042995	6.37	rs334132	0.00876	4.13	0.839	467	20	enet	0.093	3.3e-08	-0.827	0.408478	NA	NA	NA	NA	NA	2	178451513	178461390	+	0.0117	0
ENSG00000197771	sCCA3	MCMBP	../03.reference/FUSION/sCCA_weights_v8///sCCA3/sCCA3.ENSG00000197771.12.wgt.RDat	10	119892555	119892556	0.0614	rs2234962	7.69	rs12768283	0.0211	4.7	-0.06455	499	7	enet	0.029	0.0016	-0.19686	0.844	NA	NA	NA	NA	NA	10	119829404	119892556	-	0.0116	0
ENSG00000225808	sCCA3	DNAJC19P5	../03.reference/FUSION/sCCA_weights_v8///sCCA3/sCCA3.ENSG00000225808.1.wgt.RDat	2	177229505	177229506	0.0877	rs2364847	2.69	rs840681	0.067	-5.08	0.44	502	1	top1	0.067	2.8e-06	-0.44	0.659788	NA	NA	NA	NA	NA	2	177229191	177229506	-	0.0114	0
ENSG00000079156	sCCA1	OSBPL6	../03.reference/FUSION/sCCA_weights_v8///sCCA1/sCCA1.ENSG00000079156.16.wgt.RDat	2	178194480	178194481	0.6167	rs2042995	6.37	rs334601	0.394954	-11	-0.47	424	13	lasso	0.44	3.7e-40	0.512591	0.608	NA	NA	NA	NA	NA	2	178194481	178402891	+	0.0113	0
ENSG00000198873	sCCA3	GRK5	../03.reference/FUSION/sCCA_weights_v8///sCCA3/sCCA3.ENSG00000198873.11.wgt.RDat	10	119207588	119207589	0.1063	rs2234962	7.69	rs4752276	0.000221	-3.91	-0.09562	496	5	lasso	0.014	0.022	-0.74387	0.457	NA	NA	NA	NA	NA	10	119207589	119455619	+	0.0113	0
ENSG00000142627	sCCA3	EPHA2	../03.reference/FUSION/sCCA_weights_v8///sCCA3/sCCA3.ENSG00000142627.12.wgt.RDat	1	16156086	16156087	0.1046	rs945425	6.59	rs7538966	0.139	7.01	1.24116	351	1	top1	0.14	9.4e-12	1.24116	0.215	NA	NA	NA	NA	NA	1	16124337	16156087	-	0.0112	0
ENSG00000079156	sCCA3	OSBPL6	../03.reference/FUSION/sCCA_weights_v8///sCCA3/sCCA3.ENSG00000079156.16.wgt.RDat	2	178194480	178194481	0.2882	rs2042995	6.37	rs10185989	0.105	-5.83	0.169	424	40	enet	0.12	7.2e-10	-0.369	0.71205	NA	NA	NA	NA	NA	2	178194481	178402891	+	0.0111	0
ENSG00000151929	sCCA2	BAG3	../03.reference/FUSION/sCCA_weights_v8///sCCA2/sCCA2.ENSG00000151929.9.wgt.RDat	10	119651369	119651370	0.0828	rs2234962	7.69	rs3781500	0.003179	3.9	-1.64345	481	16	enet	0.016	0.016	2.04237	0.0411	0	0	0.655	0.245	0.1	10	119651370	119677819	+	0.0111	0
ENSG00000107581	sCCA2	EIF3A	../03.reference/FUSION/sCCA_weights_v8///sCCA2/sCCA2.ENSG00000107581.12.wgt.RDat	10	119080822	119080823	0.096	rs3009892	3.29	rs12783252	-0.003277	-3.24	2.1159	488	11	enet	0.0018	0.21	-1.15511	0.248	NA	NA	NA	NA	NA	10	119033733	119080823	-	0.0104	0
ENSG00000116095	sCCA3	PLEKHA3	../03.reference/FUSION/sCCA_weights_v8///sCCA3/sCCA3.ENSG00000116095.10.wgt.RDat	2	178480467	178480468	0.1104	rs2042995	6.37	rs2306636	0.00363	3.4	1.94	464	34	enet	0.03	0.0013	0.879	0.379605	NA	NA	NA	NA	NA	2	178480468	178516462	+	0.0104	0
ENSG00000180228	sCCA3	PRKRA	../03.reference/FUSION/sCCA_weights_v8///sCCA3/sCCA3.ENSG00000180228.12.wgt.RDat	2	178451434	178451435	0.1099	rs2042995	6.37	rs1434092	0.0157	4.41	0.0236	467	18	enet	0.078	4.1e-07	1.36	0.173089	NA	NA	NA	NA	NA	2	178431414	178451435	-	0.0102	0
ENSG00000237298	sCCA3	TTN-AS1	../03.reference/FUSION/sCCA_weights_v8///sCCA3/sCCA3.ENSG00000237298.9.wgt.RDat	2	178521182	178521183	0.0847	rs2042995	6.37	rs334110	0.00236	-3.97	0.679	457	1	top1	0.0024	0.19	-0.679	0.497355	NA	NA	NA	NA	NA	2	178521183	178779963	+	0.0102	0
ENSG00000116095	sCCA2	PLEKHA3	../03.reference/FUSION/sCCA_weights_v8///sCCA2/sCCA2.ENSG00000116095.10.wgt.RDat	2	178480467	178480468	0.2154	rs2042995	6.37	rs10497523	0.122	6.64	-2.93431	464	41	enet	0.14	9.2e-12	-1.75611	0.0791	NA	NA	NA	NA	NA	2	178480468	178516462	+	0.00979	0
ENSG00000142627	sCCA1	EPHA2	../03.reference/FUSION/sCCA_weights_v8///sCCA1/sCCA1.ENSG00000142627.12.wgt.RDat	1	16156086	16156087	0.2017	rs945425	6.59	rs7538966	0.215771	8.43	1.24116	351	1	top1	0.22	6e-18	1.24116	0.215	NA	NA	NA	NA	NA	1	16124337	16156087	-	0.00975	0
ENSG00000171604	sCCA3	CXXC5	../03.reference/FUSION/sCCA_weights_v8///sCCA3/sCCA3.ENSG00000171604.11.wgt.RDat	5	139647298	139647299	0.0658	rs11950646	5.693	rs155346	-0.00323	2.98	0.628442	253	10	lasso	0.0059	0.095	1.44219	0.149	NA	NA	NA	NA	NA	5	139647299	139683882	+	0.00966	0
ENSG00000204311	sCCA2	DFNB59	../03.reference/FUSION/sCCA_weights_v8///sCCA2/sCCA2.ENSG00000204311.12.wgt.RDat	2	178451512	178451513	0.1254	rs2042995	6.37	rs2054708	0.0148	4.37	1.43023	467	17	enet	0.043	0.00016	2.17772	0.0294	0	0	0.396	0.211	0.393	2	178451513	178461390	+	0.00932	0
ENSG00000120008	sCCA2	WDR11	../03.reference/FUSION/sCCA_weights_v8///sCCA2/sCCA2.ENSG00000120008.15.wgt.RDat	10	120851345	120851346	0.4839	rs1326647	-2.45	rs4751810	0.446524	-11.8	-0.40539	644	12	lasso	0.5	2.1e-47	0.59721	0.55	NA	NA	NA	NA	NA	10	120851346	120909524	+	0.00904	0
ENSG00000080947	sCCA3	CROCCP3	../03.reference/FUSION/sCCA_weights_v8///sCCA3/sCCA3.ENSG00000080947.14.wgt.RDat	1	16499256	16499257	0.4282	rs945425	6.59	rs7537985	0.243	-9.38	1.40797	239	20	enet	0.37	4.4e-32	-1.46066	0.144	NA	NA	NA	NA	NA	1	16467436	16499257	-	0.0087	0
ENSG00000146005	sCCA3	PSD2	../03.reference/FUSION/sCCA_weights_v8///sCCA3/sCCA3.ENSG00000146005.3.wgt.RDat	5	139795820	139795821	0.0679	rs11950646	5.693	rs7380824	0.00306	-4.13	2.85521	266	6	lasso	0.028	0.0019	-4.4696	7.84e-06	0.002	0.001	0.154	0.056	0.789	5	139795821	139844466	+	0.00849	0
ENSG00000196659	sCCA2	TTC30B	../03.reference/FUSION/sCCA_weights_v8///sCCA2/sCCA2.ENSG00000196659.9.wgt.RDat	2	177553013	177553014	0.1126	rs2364847	2.68	rs1344925	0.0779	5.1	0.06954	437	1	top1	0.078	4.4e-07	0.06954	0.945	NA	NA	NA	NA	NA	2	177548998	177553014	-	0.00835	0
ENSG00000197557	sCCA1	TTC30A	../03.reference/FUSION/sCCA_weights_v8///sCCA1/sCCA1.ENSG00000197557.6.wgt.RDat	2	177618965	177618966	0.2197	rs1466208	2.67	rs10497497	0.071058	-6.13	-0.0336	411	29	enet	0.21	1.4e-17	-0.286219	0.775	NA	NA	NA	NA	NA	2	177612992	177618966	-	0.00827	0
ENSG00000163510	sCCA1	CWC22	../03.reference/FUSION/sCCA_weights_v8///sCCA1/sCCA1.ENSG00000163510.13.wgt.RDat	2	180007112	180007113	0.2184	rs7594895	-2.86	rs4894137	0.207043	-8.07	-0.742	515	1	top1	0.21	3.3e-17	0.742311	0.458	NA	NA	NA	NA	NA	2	179944876	180007113	-	0.00812	0
ENSG00000079156	sCCA2	OSBPL6	../03.reference/FUSION/sCCA_weights_v8///sCCA2/sCCA2.ENSG00000079156.16.wgt.RDat	2	178194480	178194481	0.1005	rs2042995	6.37	rs2117738	0.063	-4.85	-0.3686	424	1	top1	0.063	5.4e-06	0.3686	0.712	NA	NA	NA	NA	NA	2	178194481	178402891	+	0.00807	0
ENSG00000142634	sCCA1	EFHD2	../03.reference/FUSION/sCCA_weights_v8///sCCA1/sCCA1.ENSG00000142634.12.wgt.RDat	1	15409894	15409895	0.305	rs643420	-5.71	rs12562216	0.165271	7.22	-1.38054	519	39	enet	0.18	2.8e-15	-2.03328	0.042	0	0.01	0	0.99	0	1	15409895	15430343	+	0.00774	0
ENSG00000120725	sCCA2	SIL1	../03.reference/FUSION/sCCA_weights_v8///sCCA2/sCCA2.ENSG00000120725.12.wgt.RDat	5	139293556	139293557	0.1427	rs11950646	5.693	rs11749163	0.207	-8.79	-1.01021	264	23	enet	0.25	9.9e-21	1.42741	0.153	NA	NA	NA	NA	NA	5	138946720	139293557	-	0.00716	0
ENSG00000120725	sCCA1	SIL1	../03.reference/FUSION/sCCA_weights_v8///sCCA1/sCCA1.ENSG00000120725.12.wgt.RDat	5	139293556	139293557	0.1865	rs11950646	5.693	rs11749163	0.316703	-10.64	-1.01021	264	25	enet	0.38	2.2e-33	1.17621	0.24	NA	NA	NA	NA	NA	5	138946720	139293557	-	0.00696	0
ENSG00000178715	sCCA1	RP11-169K16.8	../03.reference/FUSION/sCCA_weights_v8///sCCA1/sCCA1.ENSG00000178715.8.wgt.RDat	1	15828231	15828232	0.1556	rs945425	6.59	rs12135073	0.08884	6.06	5.47427	423	18	enet	0.14	1.7e-11	4.22929	2.34e-05	0	0	0.001	0.106	0.893	1	15828232	15828669	+	0.00693	0
ENSG00000245146	sCCA3	LINC01024	../03.reference/FUSION/sCCA_weights_v8///sCCA3/sCCA3.ENSG00000245146.6.wgt.RDat	5	140108629	140108630	0.1035	rs13188297	3.058	rs682164	0.0269	4.18	0.848527	283	1	top1	0.027	0.0024	0.848527	0.396	NA	NA	NA	NA	NA	5	140072857	140108630	-	0.00659	0
ENSG00000249751	sCCA1	ECSCR	../03.reference/FUSION/sCCA_weights_v8///sCCA1/sCCA1.ENSG00000249751.3.wgt.RDat	5	139462742	139462743	0.0836	rs11950646	5.693	rs10900864	0.025725	-4.43	5.24911	272	5	lasso	0.047	7.8e-05	-4.28402	1.84e-05	0	0	0.047	0.038	0.914	5	139448556	139462743	-	0.00659	0
ENSG00000120725	sCCA3	SIL1	../03.reference/FUSION/sCCA_weights_v8///sCCA3/sCCA3.ENSG00000120725.12.wgt.RDat	5	139293556	139293557	0.0624	rs11950646	5.693	rs10074461	0.0978	-5.94	-1.72896	264	1	top1	0.098	1.4e-08	1.72896	0.0838	NA	NA	NA	NA	NA	5	138946720	139293557	-	0.00609	0
ENSG00000184584	sCCA2	TMEM173	../03.reference/FUSION/sCCA_weights_v8///sCCA2/sCCA2.ENSG00000184584.12.wgt.RDat	5	139482789	139482790	0.3709	rs11950646	5.693	rs7380824	0.197	8.32	2.85521	267	18	enet	0.22	1.5e-18	2.2954	0.0217	0	0.01	0	0.989	0.001	5	139475964	139482790	-	0.00592	0
ENSG00000152377	sCCA2	SPOCK1	../03.reference/FUSION/sCCA_weights_v8///sCCA2/sCCA2.ENSG00000152377.13.wgt.RDat	5	137598378	137598379	0.1013	rs7720059	3.289	rs2164132	0.031	4.82	-0.32533	412	27	enet	0.032	0.0011	-1.32107	0.186	NA	NA	NA	NA	NA	5	136975298	137598379	-	0.00568	0
ENSG00000237276	sCCA1	ANO7L1	../03.reference/FUSION/sCCA_weights_v8///sCCA1/sCCA1.ENSG00000237276.8.wgt.RDat	1	16228026	16228027	0.5754	rs945425	6.59	rs12751725	0.593749	-13.47	-1.50087	322	14	enet	0.61	7.5e-65	1.88644	0.0592	NA	NA	NA	NA	NA	1	16215909	16228027	-	0.00542	0
ENSG00000146005	sCCA1	PSD2	../03.reference/FUSION/sCCA_weights_v8///sCCA1/sCCA1.ENSG00000146005.3.wgt.RDat	5	139795820	139795821	0.1874	rs11950646	5.693	rs719460	0.125162	-6.97	0.999942	266	1	top1	0.13	1.2e-10	-0.99994	0.317	NA	NA	NA	NA	NA	5	139795821	139844466	+	0.00536	0
ENSG00000184584	sCCA3	TMEM173	../03.reference/FUSION/sCCA_weights_v8///sCCA3/sCCA3.ENSG00000184584.12.wgt.RDat	5	139482789	139482790	0.3722	rs11950646	5.693	rs7380824	0.265	-9.13	2.85521	267	1	top1	0.26	3.2e-22	-2.85521	0.0043	0	0.01	0	0.989	0.001	5	139475964	139482790	-	0.00522	0
ENSG00000184584	sCCA1	TMEM173	../03.reference/FUSION/sCCA_weights_v8///sCCA1/sCCA1.ENSG00000184584.12.wgt.RDat	5	139482789	139482790	0.4607	rs11950646	5.693	rs7380824	0.410145	11.47	2.85521	267	5	lasso	0.42	3.9e-38	2.85233	0.00434	0	0.01	0	0.989	0.001	5	139475964	139482790	-	0.00516	0
ENSG00000152377	sCCA1	SPOCK1	../03.reference/FUSION/sCCA_weights_v8///sCCA1/sCCA1.ENSG00000152377.13.wgt.RDat	5	137598378	137598379	0.1828	rs7720059	3.289	rs2916638	0.075364	6.12	0.122324	412	16	lasso	0.14	1.8e-11	1.41703	0.156	NA	NA	NA	NA	NA	5	136975298	137598379	-	0.00515	0
ENSG00000249751	sCCA2	ECSCR	../03.reference/FUSION/sCCA_weights_v8///sCCA2/sCCA2.ENSG00000249751.3.wgt.RDat	5	139462742	139462743	0.0658	rs11950646	5.693	rs2882667	0.039	4.04	-1.64878	272	1	top1	0.039	0.00031	-1.64878	0.0992	NA	NA	NA	NA	NA	5	139448556	139462743	-	0.00514	0
ENSG00000142632	sCCA1	ARHGEF19	../03.reference/FUSION/sCCA_weights_v8///sCCA1/sCCA1.ENSG00000142632.16.wgt.RDat	1	16212608	16212609	0.8084	rs945425	6.59	rs221045	0.800273	-15.6	-1.51648	333	15	lasso	0.81	1.1e-111	1.72042	0.0854	NA	NA	NA	NA	NA	1	16198217	16212609	-	0.00512	0
ENSG00000015479	sCCA1	MATR3	../03.reference/FUSION/sCCA_weights_v8///sCCA1/sCCA1.ENSG00000015479.18.wgt.RDat	5	139293647	139293648	0.0621	rs11950646	5.693	rs13181830	0.012599	-4.03	-1.00561	264	1	top1	0.013	0.028	1.00561	0.315	NA	NA	NA	NA	NA	5	139293648	139331677	+	0.00494	0
ENSG00000173641	sCCA2	HSPB7	../03.reference/FUSION/sCCA_weights_v8///sCCA2/sCCA2.ENSG00000173641.17.wgt.RDat	1	16019593	16019594	0.2312	rs945425	6.59	rs1763613	0.172	-7.38	0.789731	384	19	enet	0.22	1.2e-18	-1.32248	0.186	NA	NA	NA	NA	NA	1	16014028	16019594	-	0.00489	0
ENSG00000237276	sCCA3	ANO7L1	../03.reference/FUSION/sCCA_weights_v8///sCCA3/sCCA3.ENSG00000237276.8.wgt.RDat	1	16228026	16228027	0.4044	rs945425	6.59	rs12751725	0.412	-11.25	-1.50087	322	26	enet	0.42	5.3e-38	2.03489	0.0419	0	0	0	1	0	1	16215909	16228027	-	0.00465	0
ENSG00000142632	sCCA3	ARHGEF19	../03.reference/FUSION/sCCA_weights_v8///sCCA3/sCCA3.ENSG00000142632.16.wgt.RDat	1	16212608	16212609	0.7823	rs945425	6.59	rs221045	0.714	-14.74	-1.51648	333	16	lasso	0.77	1.6e-99	1.74648	0.0807	NA	NA	NA	NA	NA	1	16198217	16212609	-	0.00462	0
ENSG00000245146	sCCA1	LINC01024	../03.reference/FUSION/sCCA_weights_v8///sCCA1/sCCA1.ENSG00000245146.6.wgt.RDat	5	140108629	140108630	0.1369	rs13188297	3.058	rs3863190	0.102763	5.83	1.79835	283	1	top1	0.1	6.1e-09	1.79835	0.0721	NA	NA	NA	NA	NA	5	140072857	140108630	-	0.00443	0
ENSG00000197312	sCCA3	DDI2	../03.reference/FUSION/sCCA_weights_v8///sCCA3/sCCA3.ENSG00000197312.11.wgt.RDat	1	15617499	15617500	0.1062	rs945425	6.59	rs904910	0.056	-5.13	4.21598	478	1	top1	0.056	1.8e-05	-4.21598	2.49e-05	0	0	0.487	0.489	0.025	1	15617500	15669044	+	0.0044	0
ENSG00000162461	sCCA3	SLC25A34	../03.reference/FUSION/sCCA_weights_v8///sCCA3/sCCA3.ENSG00000162461.7.wgt.RDat	1	15736404	15736405	0.73	rs945425	6.59	rs35352784	0.653	14.14	-1.81709	444	12	lasso	0.66	6e-74	-2.10753	0.0351	0	0	0	1	0	1	15736405	15741396	+	0.00439	0
ENSG00000179743	sCCA3	FLJ37453	../03.reference/FUSION/sCCA_weights_v8///sCCA3/sCCA3.ENSG00000179743.4.wgt.RDat	1	15836905	15836906	0.219	rs945425	6.59	rs6677321	0.123	7.09	5.20513	422	5	lasso	0.2	3e-16	3.89299	9.9e-05	0	0	0	0.903	0.096	1	15834474	15836906	-	0.00437	0
ENSG00000055070	sCCA3	SZRD1	../03.reference/FUSION/sCCA_weights_v8///sCCA3/sCCA3.ENSG00000055070.16.wgt.RDat	1	16352574	16352575	0.0603	rs945425	6.59	rs848195	0.0232	-4.15	-5.84032	269	1	top1	0.023	0.0045	5.84032	5.21e-09	0	0	0.842	0.038	0.119	1	16352575	16398145	+	0.00431	0
ENSG00000142615	sCCA2	CELA2A	../03.reference/FUSION/sCCA_weights_v8///sCCA2/sCCA2.ENSG00000142615.7.wgt.RDat	1	15456727	15456728	0.1172	rs643420	-5.71	rs10927753	-0.00186	3.68	2.49964	513	50	enet	0.0099	0.045	0.376737	0.706	NA	NA	NA	NA	NA	1	15456728	15472091	+	0.00404	0
ENSG00000132881	sCCA1	RSG1	../03.reference/FUSION/sCCA_weights_v8///sCCA1/sCCA1.ENSG00000132881.11.wgt.RDat	1	16237161	16237162	0.4971	rs945425	6.59	rs6603850	0.606207	-13.61	1.63161	316	5	lasso	0.61	2.8e-64	-1.40196	0.161	NA	NA	NA	NA	NA	1	16231700	16237162	-	0.00369	0
ENSG00000116138	sCCA2	DNAJC16	../03.reference/FUSION/sCCA_weights_v8///sCCA2/sCCA2.ENSG00000116138.12.wgt.RDat	1	15526812	15526813	0.1955	rs945425	6.59	rs4646093	0.117	6.56	-1.37473	505	1	top1	0.12	5.4e-10	-1.37473	0.169	NA	NA	NA	NA	NA	1	15526813	15592379	+	0.00364	0
ENSG00000237938	sCCA1	RP11-288I21.1	../03.reference/FUSION/sCCA_weights_v8///sCCA1/sCCA1.ENSG00000237938.5.wgt.RDat	1	15736895	15736896	0.1634	rs945425	6.59	rs10927831	0.210264	-8.32	-0.678184	444	1	top1	0.21	1.8e-17	0.678184	0.498	NA	NA	NA	NA	NA	1	15720312	15736896	-	0.00364	0
ENSG00000132881	sCCA3	RSG1	../03.reference/FUSION/sCCA_weights_v8///sCCA3/sCCA3.ENSG00000132881.11.wgt.RDat	1	16237161	16237162	0.4443	rs945425	6.59	rs6603850	0.585	13.41	1.63161	316	3	lasso	0.59	6.8e-61	1.46204	0.144	NA	NA	NA	NA	NA	1	16231700	16237162	-	0.00353	0
ENSG00000237276	sCCA2	ANO7L1	../03.reference/FUSION/sCCA_weights_v8///sCCA2/sCCA2.ENSG00000237276.8.wgt.RDat	1	16228026	16228027	0.3158	rs945425	6.59	rs12751725	0.311	9.8	-1.50087	322	11	enet	0.32	3.1e-27	-2.45509	0.0141	0	0	0	1	0	1	16215909	16228027	-	0.00353	0
ENSG00000157191	sCCA2	NECAP2	../03.reference/FUSION/sCCA_weights_v8///sCCA2/sCCA2.ENSG00000157191.19.wgt.RDat	1	16440671	16440672	0.2381	rs945425	6.59	rs279025	0.199	8.03	0.588932	240	1	top1	0.2	1.6e-16	0.588932	0.556	NA	NA	NA	NA	NA	1	16440672	16460078	+	0.00352	0
ENSG00000162461	sCCA2	SLC25A34	../03.reference/FUSION/sCCA_weights_v8///sCCA2/sCCA2.ENSG00000162461.7.wgt.RDat	1	15736404	15736405	0.5401	rs945425	6.59	rs35352784	0.495	12.35	-1.81709	444	1	top1	0.49	5e-47	-1.81709	0.0692	NA	NA	NA	NA	NA	1	15736405	15741396	+	0.00343	0
ENSG00000055070	sCCA1	SZRD1	../03.reference/FUSION/sCCA_weights_v8///sCCA1/sCCA1.ENSG00000055070.16.wgt.RDat	1	16352574	16352575	0.1113	rs945425	6.59	rs12134924	0.140457	-6.78	-1.01621	269	1	top1	0.14	7.9e-12	1.01621	0.31	NA	NA	NA	NA	NA	1	16352575	16398145	+	0.00341	0
ENSG00000116138	sCCA1	DNAJC16	../03.reference/FUSION/sCCA_weights_v8///sCCA1/sCCA1.ENSG00000116138.12.wgt.RDat	1	15526812	15526813	0.2324	rs945425	6.59	rs6685648	0.186035	-8.08	-1.39847	505	15	lasso	0.21	8.2e-18	1.22687	0.22	NA	NA	NA	NA	NA	1	15526813	15592379	+	0.00338	0
ENSG00000142632	sCCA2	ARHGEF19	../03.reference/FUSION/sCCA_weights_v8///sCCA2/sCCA2.ENSG00000142632.16.wgt.RDat	1	16212608	16212609	0.7397	rs945425	6.59	rs221045	0.682	14.45	-1.51648	333	10	lasso	0.71	2.1e-84	-1.61121	0.107	NA	NA	NA	NA	NA	1	16198217	16212609	-	0.00337	0
ENSG00000037637	sCCA3	FBXO42	../03.reference/FUSION/sCCA_weights_v8///sCCA3/sCCA3.ENSG00000037637.10.wgt.RDat	1	16352453	16352454	0.0957	rs945425	6.59	rs11260732	0.0445	4.95	0.791694	269	9	lasso	0.098	1.3e-08	4.62883	3.68e-06	0	0	0.015	0.033	0.951	1	16246839	16352454	-	0.00319	0
ENSG00000116786	sCCA2	PLEKHM2	../03.reference/FUSION/sCCA_weights_v8///sCCA2/sCCA2.ENSG00000116786.11.wgt.RDat	1	15684331	15684332	0.1442	rs945425	6.59	rs12564900	0.11	6.91	0.91935	482	10	lasso	0.12	1.6e-10	0.809735	0.418	NA	NA	NA	NA	NA	1	15684332	15734769	+	0.00307	0
ENSG00000179743	sCCA1	FLJ37453	../03.reference/FUSION/sCCA_weights_v8///sCCA1/sCCA1.ENSG00000179743.4.wgt.RDat	1	15836905	15836906	0.4034	rs945425	6.59	rs4661661	0.301679	-9.86	-0.006114	422	13	lasso	0.4	3e-35	2.61101	0.00903	0	0	0	1	0	1	15834474	15836906	-	0.00307	0
ENSG00000142634	sCCA2	EFHD2	../03.reference/FUSION/sCCA_weights_v8///sCCA2/sCCA2.ENSG00000142634.12.wgt.RDat	1	15409894	15409895	0.095	rs643420	-5.71	rs2861484	0.0782	-5.65	0.985825	519	7	lasso	0.085	1.4e-07	-0.334913	0.738	NA	NA	NA	NA	NA	1	15409895	15430343	+	0.00303	0
ENSG00000116771	sCCA1	AGMAT	../03.reference/FUSION/sCCA_weights_v8///sCCA1/sCCA1.ENSG00000116771.5.wgt.RDat	1	15585109	15585110	0.2464	rs945425	6.59	rs10927805	0.302231	9.8	0.993089	496	1	top1	0.3	1.1e-25	0.993089	0.321	NA	NA	NA	NA	NA	1	15572353	15585110	-	0.00301	0
ENSG00000116809	sCCA1	ZBTB17	../03.reference/FUSION/sCCA_weights_v8///sCCA1/sCCA1.ENSG00000116809.11.wgt.RDat	1	15976131	15976132	0.0875	rs945425	6.59	rs12724755	0.011011	-4.01	-1.9211	403	32	enet	0.025	0.0031	4.08348	4.44e-05	0	0	0.538	0.145	0.316	1	15941869	15976132	-	0.00299	0
ENSG00000235241	sCCA1	RP11-108M9.5	../03.reference/FUSION/sCCA_weights_v8///sCCA1/sCCA1.ENSG00000235241.1.wgt.RDat	1	16889094	16889095	0.4361	rs2526842	-2.38	rs6691985	0.080054	-6.96	1.36471	339	47	enet	0.37	1.2e-32	-0.70662	0.48	NA	NA	NA	NA	NA	1	16889095	16889547	+	0.00298	0
ENSG00000171729	sCCA3	TMEM51	../03.reference/FUSION/sCCA_weights_v8///sCCA3/sCCA3.ENSG00000171729.13.wgt.RDat	1	15152531	15152532	0.3287	rs1622686	3.19	rs7555700	0.183	-7.56	0.772608	556	11	lasso	0.2	1.3e-16	-0.90072	0.368	NA	NA	NA	NA	NA	1	15152532	15220480	+	0.00287	0
ENSG00000215908	sCCA1	CROCCP2	../03.reference/FUSION/sCCA_weights_v8///sCCA1/sCCA1.ENSG00000215908.10.wgt.RDat	1	16657231	16657232	0.4011	rs7544175	-2.44	rs156908	0.007933	-4.9	0.636132	255	93	enet	0.16	1.1e-13	0.492804	0.622	NA	NA	NA	NA	NA	1	16618253	16657232	-	0.00273	0
ENSG00000065526	sCCA3	SPEN	../03.reference/FUSION/sCCA_weights_v8///sCCA3/sCCA3.ENSG00000065526.10.wgt.RDat	1	15847863	15847864	0.0837	rs945425	6.59	rs4661345	0.0506	5.17	1.93472	421	4	lasso	0.06	8.9e-06	1.91464	0.0555	NA	NA	NA	NA	NA	1	15847864	15940460	+	0.00272	0
ENSG00000235084	sCCA3	CHCHD2P6	../03.reference/FUSION/sCCA_weights_v8///sCCA3/sCCA3.ENSG00000235084.3.wgt.RDat	1	15604596	15604597	0.0737	rs945425	6.59	rs7515244	0.0233	3.95	-1.43965	486	1	top1	0.023	0.0044	-1.43965	0.15	NA	NA	NA	NA	NA	1	15604597	15605043	+	0.00271	0
ENSG00000080947	sCCA1	CROCCP3	../03.reference/FUSION/sCCA_weights_v8///sCCA1/sCCA1.ENSG00000080947.14.wgt.RDat	1	16499256	16499257	0.38	rs945425	6.59	rs157252	0.226314	-9.42	-0.708628	239	9	lasso	0.35	4.2e-30	1.25451	0.21	NA	NA	NA	NA	NA	1	16467436	16499257	-	0.0027	0
ENSG00000162458	sCCA1	FBLIM1	../03.reference/FUSION/sCCA_weights_v8///sCCA1/sCCA1.ENSG00000162458.12.wgt.RDat	1	15756606	15756607	0.2287	rs945425	6.59	rs10737910	0.112752	-7.01	1.04086	438	13	enet	0.21	2.8e-17	0.387572	0.698	NA	NA	NA	NA	NA	1	15756607	15786594	+	0.00266	0
ENSG00000219481	sCCA2	NBPF1	../03.reference/FUSION/sCCA_weights_v8///sCCA2/sCCA2.ENSG00000219481.10.wgt.RDat	1	16613561	16613562	0.309	rs17416878	2.46	rs696605	0.0142	4.47	0.699748	273	48	enet	0.16	5.4e-13	0.017751	0.986	NA	NA	NA	NA	NA	1	16562319	16613562	-	0.00266	0
ENSG00000237938	sCCA2	RP11-288I21.1	../03.reference/FUSION/sCCA_weights_v8///sCCA2/sCCA2.ENSG00000237938.5.wgt.RDat	1	15736895	15736896	0.0973	rs945425	6.59	rs4661654	0.0688	5.13	0.732067	444	1	top1	0.069	2e-06	0.732067	0.464	NA	NA	NA	NA	NA	1	15720312	15736896	-	0.00266	0
ENSG00000065526	sCCA1	SPEN	../03.reference/FUSION/sCCA_weights_v8///sCCA1/sCCA1.ENSG00000065526.10.wgt.RDat	1	15847863	15847864	0.0936	rs945425	6.59	rs10803412	-0.003201	3.78	1.75831	421	23	enet	0.0097	0.047	-1.83954	0.0658	NA	NA	NA	NA	NA	1	15847864	15940460	+	0.00264	0
ENSG00000080947	sCCA2	CROCCP3	../03.reference/FUSION/sCCA_weights_v8///sCCA2/sCCA2.ENSG00000080947.14.wgt.RDat	1	16499256	16499257	0.2497	rs945425	6.59	rs7537985	0.19	-7.66	1.40797	239	6	lasso	0.24	6.3e-20	-1.81145	0.0701	NA	NA	NA	NA	NA	1	16467436	16499257	-	0.0026	0
ENSG00000055070	sCCA2	SZRD1	../03.reference/FUSION/sCCA_weights_v8///sCCA2/sCCA2.ENSG00000055070.16.wgt.RDat	1	16352574	16352575	0.0808	rs945425	6.59	rs12046247	0.0222	4.14	-2.03941	269	10	lasso	0.061	8e-06	-2.87223	0.00408	0	0	0.597	0.128	0.275	1	16352575	16398145	+	0.00256	0
ENSG00000162461	sCCA1	SLC25A34	../03.reference/FUSION/sCCA_weights_v8///sCCA1/sCCA1.ENSG00000162461.7.wgt.RDat	1	15736404	15736405	0.7483	rs945425	6.59	rs35352784	0.690366	14.51	-1.81709	444	1	top1	0.69	2.4e-79	-1.81709	0.0692	NA	NA	NA	NA	NA	1	15736405	15741396	+	0.00256	0
ENSG00000219481	sCCA1	NBPF1	../03.reference/FUSION/sCCA_weights_v8///sCCA1/sCCA1.ENSG00000219481.10.wgt.RDat	1	16613561	16613562	0.4242	rs17416878	2.46	rs761423	0.05528	5.41	-0.465758	273	30	enet	0.21	9.8e-18	-0.293319	0.769	NA	NA	NA	NA	NA	1	16562319	16613562	-	0.00253	0
ENSG00000132906	sCCA1	CASP9	../03.reference/FUSION/sCCA_weights_v8///sCCA1/sCCA1.ENSG00000132906.17.wgt.RDat	1	15526533	15526534	0.4843	rs945425	6.59	rs4263990	0.5973	13.59	0.675812	505	10	lasso	0.6	2.4e-62	0.671068	0.502	NA	NA	NA	NA	NA	1	15490832	15526534	-	0.00249	0
ENSG00000215908	sCCA2	CROCCP2	../03.reference/FUSION/sCCA_weights_v8///sCCA2/sCCA2.ENSG00000215908.10.wgt.RDat	1	16657231	16657232	0.4227	rs7544175	-2.44	rs2076606	0.0305	-4.91	-0.804143	255	94	enet	0.15	5.8e-13	0.087745	0.93	NA	NA	NA	NA	NA	1	16618253	16657232	-	0.00247	0
ENSG00000116771	sCCA2	AGMAT	../03.reference/FUSION/sCCA_weights_v8///sCCA2/sCCA2.ENSG00000116771.5.wgt.RDat	1	15585109	15585110	0.1761	rs945425	6.59	rs1980607	0.12	6.92	-0.508844	496	8	lasso	0.13	2.2e-11	0.413092	0.68	NA	NA	NA	NA	NA	1	15572353	15585110	-	0.00246	0
ENSG00000116786	sCCA1	PLEKHM2	../03.reference/FUSION/sCCA_weights_v8///sCCA1/sCCA1.ENSG00000116786.11.wgt.RDat	1	15684331	15684332	0.1949	rs945425	6.59	rs7516683	0.209635	-8.56	-0.673509	482	6	lasso	0.26	3.5e-22	0.790758	0.429	NA	NA	NA	NA	NA	1	15684332	15734769	+	0.00244	0
ENSG00000186301	sCCA2	MST1P2	../03.reference/FUSION/sCCA_weights_v8///sCCA2/sCCA2.ENSG00000186301.8.wgt.RDat	1	16645621	16645622	0.4234	rs7544175	-2.45	rs9435734	0.113	6.76	0.020425	258	61	enet	0.24	2.4e-20	-0.759409	0.448	NA	NA	NA	NA	NA	1	16645622	16650289	+	0.00244	0
ENSG00000132906	sCCA2	CASP9	../03.reference/FUSION/sCCA_weights_v8///sCCA2/sCCA2.ENSG00000132906.17.wgt.RDat	1	15526533	15526534	0.3332	rs945425	6.59	rs4263990	0.455	-11.88	0.675812	505	1	top1	0.46	4.4e-42	-0.675812	0.499	NA	NA	NA	NA	NA	1	15490832	15526534	-	0.00241	0
ENSG00000197312	sCCA2	DDI2	../03.reference/FUSION/sCCA_weights_v8///sCCA2/sCCA2.ENSG00000197312.11.wgt.RDat	1	15617499	15617500	0.195	rs945425	6.59	rs12564900	0.0779	6.05	0.901645	478	13	lasso	0.12	4.6e-10	1.25535	0.209	NA	NA	NA	NA	NA	1	15617500	15669044	+	0.00241	0
ENSG00000116138	sCCA3	DNAJC16	../03.reference/FUSION/sCCA_weights_v8///sCCA3/sCCA3.ENSG00000116138.12.wgt.RDat	1	15526812	15526813	0.092	rs945425	6.59	rs4646092	0.0623	5.33	0.741639	505	1	top1	0.062	6.1e-06	0.741639	0.458	NA	NA	NA	NA	NA	1	15526813	15592379	+	0.0024	0
ENSG00000142615	sCCA3	CELA2A	../03.reference/FUSION/sCCA_weights_v8///sCCA3/sCCA3.ENSG00000142615.7.wgt.RDat	1	15456727	15456728	0.0919	rs643420	-5.71	rs6701290	0.000393	3.25	1.1145	513	12	enet	0.012	0.029	1.31183	0.19	NA	NA	NA	NA	NA	1	15456728	15472091	+	0.00236	0
ENSG00000238142	sCCA2	RP11-108M9.4	../03.reference/FUSION/sCCA_weights_v8///sCCA2/sCCA2.ENSG00000238142.1.wgt.RDat	1	16889648	16889649	0.3855	rs1544068	-2.39	rs149565	0.131	-7.58	-0.570136	340	14	lasso	0.28	3.6e-23	-0.021651	0.983	NA	NA	NA	NA	NA	1	16888538	16889649	-	0.00236	0
ENSG00000197312	sCCA1	DDI2	../03.reference/FUSION/sCCA_weights_v8///sCCA1/sCCA1.ENSG00000197312.11.wgt.RDat	1	15617499	15617500	0.2033	rs945425	6.59	rs17448778	0.206353	8.05	-0.499456	478	8	lasso	0.24	5.1e-20	-1.22602	0.22	NA	NA	NA	NA	NA	1	15617500	15669044	+	0.00234	0
ENSG00000235084	sCCA2	CHCHD2P6	../03.reference/FUSION/sCCA_weights_v8///sCCA2/sCCA2.ENSG00000235084.3.wgt.RDat	1	15604596	15604597	0.1228	rs945425	6.59	rs848188	0.0113	-4.56	0.752004	486	58	enet	0.03	0.0015	1.91841	0.0551	NA	NA	NA	NA	NA	1	15604597	15605043	+	0.00234	0
ENSG00000235241	sCCA2	RP11-108M9.5	../03.reference/FUSION/sCCA_weights_v8///sCCA2/sCCA2.ENSG00000235241.1.wgt.RDat	1	16889094	16889095	0.4907	rs2526842	-2.38	rs6691985	0.197	7.99	1.36471	339	57	enet	0.33	9.9e-29	1.12735	0.26	NA	NA	NA	NA	NA	1	16889095	16889547	+	0.00233	0
ENSG00000058453	sCCA2	CROCC	../03.reference/FUSION/sCCA_weights_v8///sCCA2/sCCA2.ENSG00000058453.16.wgt.RDat	1	16921949	16921950	0.4291	rs2800691	-2.43	rs6691985	0.47	-12	1.43816	352	13	lasso	0.5	1.6e-47	-1.18078	0.238	NA	NA	NA	NA	NA	1	16921950	16972979	+	0.00232	0
ENSG00000065526	sCCA2	SPEN	../03.reference/FUSION/sCCA_weights_v8///sCCA2/sCCA2.ENSG00000065526.10.wgt.RDat	1	15847863	15847864	0.0608	rs945425	6.59	rs848188	0.0133	-3.64	0.752004	421	1	top1	0.013	0.025	-0.752004	0.452	NA	NA	NA	NA	NA	1	15847864	15940460	+	0.00232	0
ENSG00000058453	sCCA1	CROCC	../03.reference/FUSION/sCCA_weights_v8///sCCA1/sCCA1.ENSG00000058453.16.wgt.RDat	1	16921949	16921950	0.5042	rs2800691	-2.43	rs6691985	0.493511	-12.28	1.43816	352	17	lasso	0.56	1.2e-55	-1.10631	0.269	NA	NA	NA	NA	NA	1	16921950	16972979	+	0.00231	0
ENSG00000215908	sCCA3	CROCCP2	../03.reference/FUSION/sCCA_weights_v8///sCCA3/sCCA3.ENSG00000215908.10.wgt.RDat	1	16657231	16657232	0.4085	rs7544175	-2.44	rs156908	0.0264	-5.22	0.636132	255	103	enet	0.16	2.2e-13	0.268285	0.788	NA	NA	NA	NA	NA	1	16618253	16657232	-	0.00227	0
ENSG00000037637	sCCA2	FBXO42	../03.reference/FUSION/sCCA_weights_v8///sCCA2/sCCA2.ENSG00000037637.10.wgt.RDat	1	16352453	16352454	0.104	rs945425	6.59	rs6656611	0.0112	5.21	1.23839	269	8	enet	0.036	0.00051	1.12963	0.259	NA	NA	NA	NA	NA	1	16246839	16352454	-	0.00225	0
ENSG00000142627	sCCA2	EPHA2	../03.reference/FUSION/sCCA_weights_v8///sCCA2/sCCA2.ENSG00000142627.12.wgt.RDat	1	16156086	16156087	0.0758	rs945425	6.59	rs7538216	0.0343	4.55	1.19611	351	1	top1	0.034	0.00068	1.19611	0.232	NA	NA	NA	NA	NA	1	16124337	16156087	-	0.00225	0
ENSG00000179743	sCCA2	FLJ37453	../03.reference/FUSION/sCCA_weights_v8///sCCA2/sCCA2.ENSG00000179743.4.wgt.RDat	1	15836905	15836906	0.2837	rs945425	6.59	rs4661663	0.197	-8.3	-1.3265	422	54	enet	0.29	5.9e-25	1.60271	0.109	NA	NA	NA	NA	NA	1	15834474	15836906	-	0.00225	0
ENSG00000132881	sCCA2	RSG1	../03.reference/FUSION/sCCA_weights_v8///sCCA2/sCCA2.ENSG00000132881.11.wgt.RDat	1	16237161	16237162	0.3512	rs945425	6.59	rs6693819	0.361	-10.51	1.46197	316	8	lasso	0.37	2.6e-32	-1.12704	0.26	NA	NA	NA	NA	NA	1	16231700	16237162	-	0.00224	0
ENSG00000171729	sCCA2	TMEM51	../03.reference/FUSION/sCCA_weights_v8///sCCA2/sCCA2.ENSG00000171729.13.wgt.RDat	1	15152531	15152532	0.2217	rs1622686	3.19	rs1883761	0.0828	-6.53	0.656292	556	10	lasso	0.16	1.8e-13	-0.225056	0.822	NA	NA	NA	NA	NA	1	15152532	15220480	+	0.00224	0
ENSG00000037637	sCCA1	FBXO42	../03.reference/FUSION/sCCA_weights_v8///sCCA1/sCCA1.ENSG00000037637.10.wgt.RDat	1	16352453	16352454	0.1612	rs945425	6.59	rs4291495	0.189766	-7.82	-0.015232	269	5	lasso	0.21	1.5e-17	0.079244	0.937	NA	NA	NA	NA	NA	1	16246839	16352454	-	0.00223	0
ENSG00000186301	sCCA1	MST1P2	../03.reference/FUSION/sCCA_weights_v8///sCCA1/sCCA1.ENSG00000186301.8.wgt.RDat	1	16645621	16645622	0.5045	rs7544175	-2.45	rs9435734	0.16203	7.93	0.020425	258	74	enet	0.29	2.5e-24	-0.033332	0.973	NA	NA	NA	NA	NA	1	16645622	16650289	+	0.00223	0
ENSG00000058453	sCCA3	CROCC	../03.reference/FUSION/sCCA_weights_v8///sCCA3/sCCA3.ENSG00000058453.16.wgt.RDat	1	16921949	16921950	0.4083	rs2800691	-2.43	rs6691985	0.424	-11.37	1.43816	352	13	lasso	0.44	1.1e-39	-1.18548	0.236	NA	NA	NA	NA	NA	1	16921950	16972979	+	0.0022	0
ENSG00000186715	sCCA1	MST1L	../03.reference/FUSION/sCCA_weights_v8///sCCA1/sCCA1.ENSG00000186715.10.wgt.RDat	1	16770236	16770237	0.2961	rs7544175	-2.34	rs7513616	0.260041	9.55	-1.11929	290	7	lasso	0.34	8.4e-30	-1.15925	0.246	NA	NA	NA	NA	NA	1	16754910	16770237	-	0.00214	0
ENSG00000226029	sCCA1	LINC01772	../03.reference/FUSION/sCCA_weights_v8///sCCA1/sCCA1.ENSG00000226029.1.wgt.RDat	1	16460947	16460948	0.6497	rs945425	6.59	rs12093260	0.33756	-10.2	0.62381	234	5	lasso	0.44	1.4e-40	-0.722655	0.47	NA	NA	NA	NA	NA	1	16460948	16463287	+	0.00214	0
ENSG00000142615	sCCA1	CELA2A	../03.reference/FUSION/sCCA_weights_v8///sCCA1/sCCA1.ENSG00000142615.7.wgt.RDat	1	15456727	15456728	0.0885	rs643420	-5.71	rs11580170	0.067742	-4.67	0.328632	513	1	top1	0.068	2.4e-06	-0.328632	0.742	NA	NA	NA	NA	NA	1	15456728	15472091	+	0.00212	0
ENSG00000186301	sCCA3	MST1P2	../03.reference/FUSION/sCCA_weights_v8///sCCA3/sCCA3.ENSG00000186301.8.wgt.RDat	1	16645621	16645622	0.2917	rs7544175	-2.45	rs7513616	0.0631	-5.63	-1.16834	258	46	enet	0.19	1.6e-15	-0.061858	0.951	NA	NA	NA	NA	NA	1	16645622	16650289	+	0.00212	0
ENSG00000235084	sCCA1	CHCHD2P6	../03.reference/FUSION/sCCA_weights_v8///sCCA1/sCCA1.ENSG00000235084.3.wgt.RDat	1	15604596	15604597	0.108	rs945425	6.59	rs2236215	0.03916	-4.91	0.296226	486	6	lasso	0.049	6.2e-05	0.22807	0.82	NA	NA	NA	NA	NA	1	15604597	15605043	+	0.0021	0
ENSG00000219481	sCCA3	NBPF1	../03.reference/FUSION/sCCA_weights_v8///sCCA3/sCCA3.ENSG00000219481.10.wgt.RDat	1	16613561	16613562	0.2199	rs17416878	2.46	rs15786	0.0336	4.44	1.05336	273	42	enet	0.11	3.6e-09	-0.187921	0.851	NA	NA	NA	NA	NA	1	16562319	16613562	-	0.00209	0
ENSG00000226029	sCCA3	LINC01772	../03.reference/FUSION/sCCA_weights_v8///sCCA3/sCCA3.ENSG00000226029.1.wgt.RDat	1	16460947	16460948	0.2831	rs945425	6.59	rs12093260	0.162	7.21	0.62381	234	14	enet	0.2	1.8e-16	0.911728	0.362	NA	NA	NA	NA	NA	1	16460948	16463287	+	0.00208	0
ENSG00000171729	sCCA1	TMEM51	../03.reference/FUSION/sCCA_weights_v8///sCCA1/sCCA1.ENSG00000171729.13.wgt.RDat	1	15152531	15152532	0.4223	rs1622686	3.19	rs1883761	0.418804	-11.35	0.656292	556	8	lasso	0.46	1.1e-42	-0.528288	0.597	NA	NA	NA	NA	NA	1	15152532	15220480	+	0.00207	0
ENSG00000132906	sCCA3	CASP9	../03.reference/FUSION/sCCA_weights_v8///sCCA3/sCCA3.ENSG00000132906.17.wgt.RDat	1	15526533	15526534	0.3539	rs945425	6.59	rs4263990	0.41	11.26	0.675812	505	9	lasso	0.43	9.5e-39	0.366955	0.714	NA	NA	NA	NA	NA	1	15490832	15526534	-	0.00205	0
ENSG00000162458	sCCA3	FBLIM1	../03.reference/FUSION/sCCA_weights_v8///sCCA3/sCCA3.ENSG00000162458.12.wgt.RDat	1	15756606	15756607	0.1498	rs945425	6.59	rs6429774	0.00581	4.12	1.16424	438	60	enet	0.022	0.0051	-0.001664	0.999	NA	NA	NA	NA	NA	1	15756607	15786594	+	0.00205	0
ENSG00000142634	sCCA3	EFHD2	../03.reference/FUSION/sCCA_weights_v8///sCCA3/sCCA3.ENSG00000142634.12.wgt.RDat	1	15409894	15409895	0.1897	rs643420	-5.71	rs10754889	0.0974	-5.82	0.010372	519	26	enet	0.14	1.3e-11	-0.176758	0.86	NA	NA	NA	NA	NA	1	15409895	15430343	+	0.00202	0
ENSG00000116771	sCCA3	AGMAT	../03.reference/FUSION/sCCA_weights_v8///sCCA3/sCCA3.ENSG00000116771.5.wgt.RDat	1	15585109	15585110	0.1041	rs945425	6.59	rs3754329	0.0837	-5.52	0.695772	496	1	top1	0.084	1.6e-07	-0.695772	0.487	NA	NA	NA	NA	NA	1	15572353	15585110	-	0.00201	0
