# Supplementary material for: Genomic structural equation modeling reveals shared genetic structure of cardiac function and structure-function association studies of CLCNKA mutations
Source: Research Square preprint supplement (doi:10.21203/rs.3.rs-7363435/v1), 2025-09-19
Supplement: Supplementary file 6 [file 2ae069c6022adac64f237ac8.xlsx]

## Sheet: STable14
Name	Coefficient	Coefficient_std_error	Coefficient_P_value	FDR
Heart_cardiac_muscle_cell	1.22031e-08	3.69648e-09	0.000481249	0.0553436
Mammary_Gland_basal_cell	6.96204e-09	2.63677e-09	0.00414078	0.238095
Brain_Non-Myeloid_brain_pericyte	6.18294e-09	2.87304e-09	0.0156964	0.459408
Mammary_Gland_luminal_epithelial_cell_of_mammary_gland	5.72404e-09	2.73006e-09	0.0180113	0.459408
Trachea_epithelial_cell	6.20445e-09	3.10491e-09	0.0228439	0.459408
Heart_smooth_muscle_cell	5.64324e-09	2.87029e-09	0.0246443	0.459408
Tongue_basal_cell_of_epidermis	4.28341e-09	2.27768e-09	0.0300129	0.459408
Lung_unknown_cell_type	8.15728e-09	4.5254e-09	0.0357291	0.459408
Lung_epithelial_cell_of_lung	6.53034e-09	3.62856e-09	0.0359537	0.459408
Tongue_keratinocyte	4.69198e-09	2.70148e-09	0.0412096	0.473911
Marrow_immature_B_cell	5.98205e-09	3.87163e-09	0.0611611	0.628095
Kidney_kidney_collecting_duct_epithelial_cell	6.38303e-09	4.27514e-09	0.0677113	0.628095
Marrow_precursor_B_cell	5.18148e-09	3.55596e-09	0.0725408	0.628095
Lung_monocyte	6.08426e-09	4.25691e-09	0.0764638	0.628095
Pancreas_type_B_pancreatic_cell	2.32147e-09	1.9013e-09	0.111046	0.828578
Pancreas_pancreatic_D_cell	2.0174e-09	1.69083e-09	0.116407	0.828578
Trachea_endothelial_cell	4.0801e-09	3.53129e-09	0.123961	0.828578
Fat_B_cell	4.6762e-09	4.6289e-09	0.156195	0.828578
Limb_Muscle_skeletal_muscle_satellite_stem_cell	3.29031e-09	3.29092e-09	0.1587	0.828578
Marrow_late_pro-B_cell	3.22893e-09	3.32899e-09	0.166037	0.828578
Pancreas_pancreatic_acinar_cell	3.78305e-09	3.97201e-09	0.17044	0.828578
Pancreas_pancreatic_A_cell	1.90504e-09	2.01123e-09	0.171768	0.828578
Fat_endothelial_cell	3.28292e-09	3.50632e-09	0.174563	0.828578
Mammary_Gland_endothelial_cell	4.40865e-09	4.73068e-09	0.175687	0.828578
Limb_Muscle_B_cell	4.09157e-09	4.67277e-09	0.190619	0.828578
Pancreas_pancreatic_PP_cell	1.88521e-09	2.19857e-09	0.195593	0.828578
Limb_Muscle_endothelial_cell	2.97332e-09	3.5289e-09	0.199736	0.828578
Kidney_epithelial_cell_of_proximal_tubule	2.26436e-09	2.71045e-09	0.201741	0.828578
Lung_B_cell	4.32086e-09	5.59126e-09	0.219824	0.837692
Fat_unknown_cell_type	2.15813e-09	3.06678e-09	0.240806	0.837692
Large_Intestine_enteroendocrine_cell	2.09747e-09	2.98297e-09	0.240981	0.837692
Pancreas_pancreatic_stellate_cell	2.0104e-09	3.00344e-09	0.251631	0.837692
Large_Intestine_Brush_cell_of_epithelium_proper_of_large_intestine	2.05356e-09	3.1205e-09	0.255241	0.837692
Liver_B_cell	3.5425e-09	5.49621e-09	0.259614	0.837692
Marrow_granulocytopoietic_cell	1.91931e-09	2.98618e-09	0.260199	0.837692
Heart_endothelial_cell	2.1523e-09	3.44447e-09	0.266033	0.837692
Lung_lung_endothelial_cell	2.01688e-09	3.28338e-09	0.269518	0.837692
Kidney_endothelial_cell	2.14986e-09	3.67143e-09	0.279084	0.844595
Marrow_Slamf1-negative_multipotent_progenitor_cell	1.45969e-09	2.81344e-09	0.301941	0.872673
Bladder_bladder_cell	1.15536e-09	2.39176e-09	0.314528	0.872673
Heart_myofibroblast_cell	1.25802e-09	2.72388e-09	0.322095	0.872673
Spleen_B_cell	1.84785e-09	4.39383e-09	0.33704	0.872673
Limb_Muscle_lymphocyte	2.22884e-09	5.58193e-09	0.344838	0.872673
Kidney_leukocyte	2.23808e-09	5.94677e-09	0.353328	0.872673
Limb_Muscle_skeletal_muscle_satellite_cell	9.51648e-10	2.56568e-09	0.35535	0.872673
Brain_Non-Myeloid_neuron	6.94072e-10	1.90313e-09	0.357668	0.872673
Marrow_naive_B_cell	1.60818e-09	4.53959e-09	0.361574	0.872673
Marrow_hematopoietic_precursor_cell	1.05417e-09	3.03681e-09	0.364246	0.872673
Brain_Non-Myeloid_endothelial_cell	9.72686e-10	3.21899e-09	0.381261	0.880123
Pancreas_leukocyte	1.60206e-09	5.43628e-09	0.384112	0.880123
Lung_leukocyte	1.19538e-09	5.02505e-09	0.405986	0.880123
Limb_Muscle_macrophage	8.34814e-10	4.47707e-09	0.42604	0.880123
Skin_stem_cell_of_epidermis	6.4295e-10	3.49494e-09	0.42702	0.880123
Heart_leukocyte	6.261e-10	3.68952e-09	0.432624	0.880123
Brain_Myeloid_microglial_cell	4.9887e-10	3.22087e-09	0.438455	0.880123
Liver_natural_killer_cell	4.82432e-10	4.56377e-09	0.457907	0.880123
Heart_unknown_cell_type	3.21469e-10	3.05135e-09	0.458048	0.880123
Marrow_monocyte	3.10763e-10	3.20879e-09	0.461424	0.880123
Heart_endocardial_cell	2.3142e-10	2.72613e-09	0.466175	0.880123
Marrow_B_cell	1.70539e-10	5.90352e-09	0.488477	0.880123
Fat_mesenchymal_stem_cell_of_adipose	7.2858e-11	2.61939e-09	0.488905	0.880123
Liver_hepatocyte	-1.21556e-11	2.88688e-09	0.50168	0.880123
Marrow_megakaryocyte-erythroid_progenitor_cell	-6.70469e-11	3.07986e-09	0.508684	0.880123
Limb_Muscle_mesenchymal_stem_cell	-1.1859e-10	2.78478e-09	0.516984	0.880123
Marrow_granulocyte_monocyte_progenitor_cell	-2.88548e-10	3.40806e-09	0.533737	0.880123
Lung_ciliated_columnar_cell_of_tracheobronchial_tree	-2.59854e-10	2.80035e-09	0.536966	0.880123
Pancreas_endothelial_cell	-3.77345e-10	3.64133e-09	0.541268	0.880123
Marrow_macrophage	-3.90006e-10	3.28628e-09	0.547234	0.880123
Skin_epidermal_cell	-3.5311e-10	2.75321e-09	0.551026	0.880123
Trachea_blood_cell	-4.40149e-10	3.41644e-09	0.551255	0.880123
Marrow_common_lymphoid_progenitor	-3.97052e-10	2.97027e-09	0.55317	0.880123
Marrow_pre-natural_killer_cell	-5.04371e-10	3.63838e-09	0.555127	0.880123
Mammary_Gland_stromal_cell	-4.02347e-10	2.56952e-09	0.562214	0.880123
Bladder_bladder_urothelial_cell	-4.14712e-10	2.48236e-09	0.56634	0.880123
Pancreas_pancreatic_ductal_cell	-5.72557e-10	2.55973e-09	0.588496	0.896435
Lung_stromal_cell	-6.17737e-10	2.27398e-09	0.607056	0.896435
Thymus_leukocyte	-1.25036e-09	4.47033e-09	0.610147	0.896435
Fat_myeloid_cell	-1.06852e-09	3.54926e-09	0.618313	0.896435
Brain_Non-Myeloid_Bergmann_glial_cell	-6.57199e-10	2.1305e-09	0.621138	0.896435
Marrow_immature_T_cell	-1.19781e-09	3.80298e-09	0.623607	0.896435
Lung_classical_monocyte	-1.54025e-09	4.29322e-09	0.640114	0.908804
Trachea_mesenchymal_cell	-9.79032e-10	2.37289e-09	0.660047	0.913232
Heart_erythrocyte	-1.08785e-09	2.5848e-09	0.663073	0.913232
Kidney_macrophage	-2.21686e-09	5.134e-09	0.667056	0.913232
Heart_fibroblast	-1.14071e-09	2.44149e-09	0.679829	0.919768
Marrow_granulocyte	-1.62427e-09	3.18704e-09	0.694851	0.929161
Brain_Myeloid_macrophage	-2.3803e-09	3.85953e-09	0.731295	0.934195
Fat_T_cell	-2.19163e-09	3.50059e-09	0.734367	0.934195
Skin_basal_cell_of_epidermis	-1.75208e-09	2.78143e-09	0.735626	0.934195
Limb_Muscle_T_cell	-3.34143e-09	4.83358e-09	0.75531	0.934195
Skin_keratinocyte_stem_cell	-1.71385e-09	2.44783e-09	0.758083	0.934195
Marrow_immature_natural_killer_cell	-2.93058e-09	4.14978e-09	0.759969	0.934195
Brain_Non-Myeloid_oligodendrocyte_precursor_cell	-1.25401e-09	1.70576e-09	0.76888	0.934195
Lung_natural_killer_cell	-2.88532e-09	3.9177e-09	0.769281	0.934195
Fat_natural_killer_cell	-3.09072e-09	4.12929e-09	0.772917	0.934195
Lung_T_cell	-3.19673e-09	4.14253e-09	0.779849	0.934195
Marrow_basophil	-3.79957e-09	4.34478e-09	0.809081	0.942964
Marrow_Slamf1-positive_multipotent_progenitor_cell	-2.59174e-09	2.95531e-09	0.809751	0.942964
Marrow_mature_natural_killer_cell	-3.27924e-09	3.70773e-09	0.811769	0.942964
Large_Intestine_large_intestine_goblet_cell	-2.47551e-09	2.67369e-09	0.822745	0.946157
Spleen_macrophage	-4.34885e-09	4.44798e-09	0.835892	0.951759
Heart_professional_antigen_presenting_cell	-2.97639e-09	2.81141e-09	0.855128	0.952492
Liver_endothelial_cell_of_hepatic_sinusoid	-2.7374e-09	2.56002e-09	0.85753	0.952492
Marrow_regulatory_T_cell	-4.95751e-09	4.56258e-09	0.861384	0.952492
Spleen_T_cell	-4.423e-09	3.86059e-09	0.874036	0.957278
Skin_leukocyte	-4.98832e-09	4.04661e-09	0.891159	0.96136
Lung_myeloid_cell	-5.47051e-09	4.37386e-09	0.894483	0.96136
Large_Intestine_epithelial_cell_of_large_intestine	-3.40465e-09	2.37785e-09	0.923901	0.97723
Brain_Non-Myeloid_oligodendrocyte	-2.8579e-09	1.97318e-09	0.926244	0.97723
Brain_Non-Myeloid_astrocyte	-3.351e-09	1.81301e-09	0.967721	0.993253
Marrow_immature_NK_T_cell	-7.39499e-09	3.95505e-09	0.969241	0.993253
Thymus_immature_T_cell	-5.89626e-09	3.0317e-09	0.974105	0.993253
Liver_Kupffer_cell	-9.35918e-09	4.73404e-09	0.975979	0.993253
Large_Intestine_enterocyte_of_epithelium_of_large_intestine	-6.00236e-09	2.52094e-09	0.991367	0.997066
Thymus_DN1_thymic_pro-T_cell	-9.30012e-09	3.37562e-09	0.997066	0.997066

## Sheet: STable14_Cahoy
Name	Coefficient	Coefficient_std_error	Coefficient_P_value	FDR
Neuron	1.5318e-10	1.46189e-09	0.458274	0.798226
Oligodendrocyte	-1.16907e-10	1.44906e-09	0.532151	0.798226
Astrocyte	-2.14379e-09	1.40348e-09	0.936679	0.936679

## Sheet: STable14_GTEx
Name	Coefficient	Coefficient_std_error	Coefficient_P_value	FDR
Muscle_Skeletal	3.14898e-09	1.50343e-09	0.0181067	0.819267
Heart_Left_Ventricle	2.43562e-09	1.44377e-09	0.0458034	0.819267
Brain_Hypothalamus	1.74831e-09	1.20083e-09	0.0727073	0.819267
Heart_Atrial_Appendage	1.90409e-09	1.39711e-09	0.0864606	0.819267
Vagina	1.4718e-09	1.27493e-09	0.124165	0.819267
Thyroid	1.5796e-09	1.44595e-09	0.137322	0.819267
Brain_Amygdala	1.09168e-09	1.21827e-09	0.185103	0.819267
Minor_Salivary_Gland	1.4182e-09	1.58526e-09	0.185495	0.819267
Uterus	1.37068e-09	1.61545e-09	0.198085	0.819267
Artery_Coronary	1.15972e-09	1.43744e-09	0.209892	0.819267
Skin_Not_Sun_Exposed_(Suprapubic)	1.11489e-09	1.39926e-09	0.212792	0.819267
Cervix_Ectocervix	1.20755e-09	1.52747e-09	0.214601	0.819267
Esophagus_Mucosa	1.16193e-09	1.57303e-09	0.230057	0.819267
Pituitary	1.00724e-09	1.42106e-09	0.239228	0.819267
Bladder	9.47536e-10	1.40989e-09	0.250772	0.819267
Artery_Tibial	8.45348e-10	1.33209e-09	0.262844	0.819267
Ovary	8.64381e-10	1.5e-09	0.282222	0.819267
Brain_Anterior_cingulate_cortex_(BA24)	5.14927e-10	1.17479e-09	0.33058	0.819267
Nerve_Tibial	5.9055e-10	1.42195e-09	0.338958	0.819267
Colon_Sigmoid	4.96724e-10	1.44343e-09	0.365376	0.819267
Brain_Substantia_nigra	3.79118e-10	1.14689e-09	0.370488	0.819267
Brain_Frontal_Cortex_(BA9)	3.63421e-10	1.15574e-09	0.37659	0.819267
Brain_Cortex	3.54178e-10	1.18164e-09	0.38219	0.819267
Adipose_Subcutaneous	4.10289e-10	1.43863e-09	0.387748	0.819267
Brain_Cerebellar_Hemisphere	2.92794e-10	1.18471e-09	0.402398	0.819267
Spleen	3.60182e-10	1.71416e-09	0.416787	0.819267
Artery_Aorta	2.81694e-10	1.35011e-09	0.417363	0.819267
Brain_Nucleus_accumbens_(basal_ganglia)	1.12554e-10	1.18872e-09	0.462283	0.848337
Brain_Hippocampus	4.24486e-11	1.16739e-09	0.485497	0.848337
Brain_Cerebellum	-3.03234e-11	1.16883e-09	0.510349	0.848337
Colon_Transverse	-1.54007e-10	1.79003e-09	0.534281	0.848337
Cells_EBV-transformed_lymphocytes	-2.27711e-10	1.8117e-09	0.550011	0.848337
Stomach	-2.57859e-10	1.73898e-09	0.55894	0.848337
Liver	-2.74994e-10	1.61498e-09	0.567604	0.848337
Testis	-2.25562e-10	1.30297e-09	0.568719	0.848337
Brain_Putamen_(basal_ganglia)	-2.33658e-10	1.19882e-09	0.577267	0.848337
Brain_Caudate_(basal_ganglia)	-3.06714e-10	1.20206e-09	0.600699	0.848337
Cells_Transformed_fibroblasts	-3.9459e-10	1.43624e-09	0.608242	0.848337
Small_Intestine_Terminal_Ileum	-6.57091e-10	1.64479e-09	0.655237	0.855312
Breast_Mammary_Tissue	-8.27494e-10	1.39765e-09	0.723095	0.855312
Lung	-9.37877e-10	1.57448e-09	0.724304	0.855312
Skin_Sun_Exposed_(Lower_leg)	-9.03694e-10	1.39373e-09	0.741637	0.855312
Kidney_Cortex	-1.06958e-09	1.51952e-09	0.759251	0.855312
Esophagus_Muscularis	-1.09318e-09	1.46425e-09	0.772341	0.855312
Pancreas	-1.15719e-09	1.52179e-09	0.776496	0.855312
Cervix_Endocervix	-1.17784e-09	1.53108e-09	0.779138	0.855312
Esophagus_Gastroesophageal_Junction	-1.18733e-09	1.44237e-09	0.794797	0.855312
Brain_Spinal_cord_(cervical_c-1)	-9.30922e-10	1.12661e-09	0.795683	0.855312
Adrenal_Gland	-1.35022e-09	1.56418e-09	0.80599	0.855312
Adipose_Visceral_(Omentum)	-1.19677e-09	1.38113e-09	0.806898	0.855312
Prostate	-2.01059e-09	1.40405e-09	0.923928	0.96016
Whole_Blood	-3.43026e-09	1.72571e-09	0.97658	0.98317
Fallopian_Tube	-2.93261e-09	1.38062e-09	0.98317	0.98317

## Sheet: STable14_Multi_tissue_chromatin
Name	Coefficient	Coefficient_std_error	Coefficient_P_value	FDR
Fetal_Heart__H3K9ac	1.074e-07	2.11335e-08	1.86772e-07	9.13315e-05
Fetal_Heart__DNase	1.10324e-07	2.36095e-08	1.48513e-06	0.000249382
Fetal_Heart__H3K4me1	4.92163e-08	1.05461e-08	1.52995e-06	0.000249382
Right_Ventricle__H3K27ac	1.25021e-07	2.85132e-08	5.80775e-06	0.000709997
Skeletal_Muscle_Female__H3K9ac	1.64325e-07	3.88896e-08	1.1925e-05	0.00116627
Right_Atrium__H3K27ac	1.09361e-07	2.72408e-08	2.97722e-05	0.00221337
Left_Ventricle__H3K27ac	8.49568e-08	2.12397e-08	3.16843e-05	0.00221337
Left_Ventricle__H3K4me3	3.34556e-07	8.87817e-08	8.218e-05	0.00468219
Skeletal_Muscle_Female__H3K27ac	6.70511e-08	1.78497e-08	8.61753e-05	0.00468219
Skeletal_Muscle_Male__H3K9ac	8.41931e-08	2.31447e-08	0.000137548	0.00672611
Heart-Atrial_ENTEX__H3K27ac	4.00205e-08	1.14437e-08	0.000235124	0.0104523
Stomach_Smooth_Muscle__H3K4me1	6.28066e-08	1.81758e-08	0.000274638	0.0111915
Right_Ventricle__H3K4me1	7.61375e-08	2.28838e-08	0.000438716	0.0161918
Skeletal_Muscle_Female__H3K4me1	4.86599e-08	1.46967e-08	0.000464904	0.0161918
Stomach_Smooth_Muscle__H3K4me3	1.37039e-07	4.16229e-08	0.00049668	0.0161918
Aorta__H3K27ac	7.25887e-08	2.21887e-08	0.000535045	0.0163523
Skeletal_Muscle_Female__H3K4me3	1.32991e-07	4.1009e-08	0.000591435	0.0167294
Skeletal_Muscle_Male__H3K4me3	1.57791e-07	4.88297e-08	0.000615807	0.0167294
Right_Ventricle__H3K4me3	2.87706e-07	9.18686e-08	0.000868941	0.0223638
Fetal_Heart__H3K4me3	1.19138e-07	3.93626e-08	0.00123623	0.0302257
Psoas_Muscle__H3K27ac	8.09818e-08	2.75015e-08	0.0016167	0.0376459
Right_Atrium__H3K4me1	8.14144e-08	2.81326e-08	0.00190212	0.0422788
Heart-LV_ENTEX__H3K4me3	1.75185e-07	6.16911e-08	0.00225772	0.0467168
Left_Ventricle__H3K4me1	6.30611e-08	2.22455e-08	0.00229285	0.0467168
Skeletal_Muscle_Male__H3K4me1	4.40068e-08	1.60086e-08	0.00298928	0.0584702
Aorta__H3K4me1	9.47867e-08	3.47349e-08	0.00317771	0.0597654
Colon_Smooth_Muscle__H3K4me1	3.55354e-08	1.33113e-08	0.00379744	0.0687759
Esoph-GJ_ENTEX__H3K4me3	1.22318e-07	4.83311e-08	0.0056897	0.0937962
Osteoblast_Primary_Cells__H3K27ac	3.30621e-08	1.30801e-08	0.00574114	0.0937962
Osteoblast_Primary_Cells__H3K4me1	3.28103e-08	1.29846e-08	0.00575437	0.0937962
Colon_Smooth_Muscle__H3K27ac	4.78748e-08	1.90976e-08	0.0060905	0.0960727
Psoas_Muscle__DNase	1.1144e-07	4.52434e-08	0.00688647	0.105234
Rectal_Smooth_Muscle__H3K27ac	4.49242e-08	1.83493e-08	0.00717704	0.106351
Fetal_Muscle_Leg__H3K4me3	1.85426e-07	7.62132e-08	0.00748735	0.107686
Colon_Smooth_Muscle__H3K9ac	1.12712e-07	4.71591e-08	0.00842331	0.115997
Placenta_Amnion__H3K4me1	3.5341e-08	1.4855e-08	0.00867808	0.115997
Osteoblast_Primary_Cells__H3K36me3	3.06214e-08	1.29009e-08	0.00880836	0.115997
Rectal_Smooth_Muscle__H3K4me1	4.57396e-08	1.93399e-08	0.00901407	0.115997
Fetal_Muscle_Leg__H3K36me3	5.30099e-08	2.26358e-08	0.00959377	0.120291
Placenta__H3K4me1	4.14064e-08	1.81034e-08	0.0110917	0.135596
Fetal_Muscle_Trunk__H3K36me3	4.52462e-08	2.00455e-08	0.0119985	0.141789
Heart-LV_ENTEX__H3K27ac	3.13695e-08	1.3933e-08	0.0121782	0.141789
Aorta_ENTEX__H3K27ac	1.70472e-08	7.60788e-09	0.0125217	0.142398
Heart-Atrial_ENTEX__H3K4me3	1.87626e-07	8.43209e-08	0.013036	0.144877
Esoph-Muscularis_ENTEX__H3K4me1	3.0042e-08	1.36949e-08	0.01413	0.151788
Duodenum_Smooth_Muscle__H3K4me1	4.87542e-08	2.22668e-08	0.0142787	0.151788
Placenta__H3K27ac	3.44176e-08	1.59446e-08	0.0154414	0.15574
Fetal_Muscle_Trunk__H3K4me3	1.58721e-07	7.38e-08	0.01575	0.15574
Heart-Atrial_ENTEX__H3K36me3	6.82888e-08	3.17878e-08	0.0158462	0.15574
Aorta__H3K4me3	1.76299e-07	8.22047e-08	0.0159913	0.15574
Aorta_ENTEX__H3K4me3	5.08708e-08	2.37894e-08	0.0162428	0.15574
Duodenum_Smooth_Muscle__H3K27ac	5.38225e-08	2.55828e-08	0.0176955	0.166406
Aorta_ENTEX__H3K4me1	1.58321e-08	7.56364e-09	0.0181666	0.167612
Stomach_Smooth_Muscle__H3K27ac	3.68337e-08	1.77907e-08	0.0192078	0.171527
Primary_B_cells_from_peripheral_blood__H3K4me3	1.55052e-07	7.49553e-08	0.0192924	0.171527
Primary_B_cells_from_peripheral_blood__H3K36me3	2.2764e-08	1.11915e-08	0.0209735	0.183144
Placenta_Amnion__H3K27ac	6.14297e-08	3.0725e-08	0.0227857	0.187354
NHLF_Lung_Fibroblast_Primary_Cells__H3K4me1	4.46992e-08	2.23834e-08	0.0229134	0.187354
Fetal_Heart__H3K36me3	2.54717e-07	1.27905e-07	0.0232156	0.187354
Vagina_ENTEX__H3K36me3	1.22841e-07	6.17042e-08	0.0232511	0.187354
Colon-Sigm_ENTEX__H3K4me3	1.91946e-07	9.6522e-08	0.0233714	0.187354
Colon_Smooth_Muscle__H3K4me3	9.42283e-08	4.83326e-08	0.025613	0.202012
Placenta__DNase	5.05129e-08	2.62439e-08	0.0271304	0.210583
Ovary__H3K4me1	4.4068e-08	2.30754e-08	0.0280833	0.214574
Esoph-Mucosa_ENTEX__H3K27ac	3.21822e-08	1.71532e-08	0.0303161	0.22692
Primary_hematopoietic_stem_cells__H3K36me3	5.39173e-08	2.88073e-08	0.0306272	0.22692
Esophagus__H3K27ac	3.91897e-08	2.12426e-08	0.032529	0.237413
Psoas_Muscle__H3K4me3	1.83763e-07	1.0107e-07	0.0345194	0.248235
Primary_B_cells_from_cord_blood__H3K36me3	8.29943e-08	4.69797e-08	0.0386478	0.273895
Colon_Smooth_Muscle__H3K36me3	4.17816e-08	2.43227e-08	0.0429161	0.297372
Spleen__H3K4me3	7.10033e-08	4.15463e-08	0.0437238	0.297372
Fetal_Kidney__H3K36me3	9.09929e-08	5.33233e-08	0.0439633	0.297372
Skeletal_Muscle_Female__H3K36me3	6.27344e-08	3.68627e-08	0.0443929	0.297372
Fetal_Muscle_Leg__H3K27ac	2.87087e-08	1.69554e-08	0.0452103	0.297451
Stomach_Smooth_Muscle__H3K9ac	8.21855e-08	4.86628e-08	0.0456213	0.297451
Ovary__H3K27ac	4.16795e-08	2.64432e-08	0.0574915	0.369913
Left_Ventricle__H3K36me3	6.15505e-08	4.03472e-08	0.0635645	0.403676
skeletal_muscle_ENTEX__H3K27ac	1.11574e-08	7.39077e-09	0.0655679	0.411061
Foreskin_Fibroblast_Primary_Cells_skin02__H3K4me1	2.18629e-08	1.49497e-08	0.0718113	0.442424
Right_Atrium__H3K4me3	9.49019e-08	6.52392e-08	0.0728794	0.442424
Skeletal_Muscle_Male__H3K36me3	6.97667e-08	4.8224e-08	0.0739875	0.442424
Breast_Myoepithelial_Primary_Cells__H3K4me1	1.82726e-08	1.2643e-08	0.0741897	0.442424
Colon-Sigm_ENTEX__H3K36me3	3.84268e-08	2.70771e-08	0.0779254	0.455929
Fetal_Lung__H3K36me3	2.34442e-08	1.66323e-08	0.0793354	0.455929
NHDF-Ad_Adult_Dermal_Fibroblast_Primary_Cells__H3K4me1	2.71766e-08	1.93236e-08	0.0798039	0.455929
Foreskin_Fibroblast_Primary_Cells_skin02__DNase	4.04173e-08	2.87906e-08	0.0801838	0.455929
Psoas_Muscle__H3K36me3	8.52803e-08	6.22415e-08	0.0853197	0.479556
Fetal_Muscle_Trunk__H3K27ac	2.77458e-08	2.0504e-08	0.0879971	0.486968
Primary_B_cells_from_cord_blood__H3K4me3	8.50436e-08	6.30308e-08	0.0886301	0.486968
Small_Intestine__H3K4me1	4.12509e-08	3.0842e-08	0.0905308	0.491884
Heart-LV_ENTEX__H3K4me1	2.9575e-08	2.25316e-08	0.0946581	0.506635
Uterus_ENTEX__H3K4me3	1.12462e-07	8.59339e-08	0.0953178	0.506635
skeletal_muscle_ENTEX__H3K4me1	9.93877e-09	7.65867e-09	0.0971927	0.511046
Breast_Myoepithelial_Primary_Cells__H3K36me3	1.92472e-08	1.49048e-08	0.0982935	0.511335
Foreskin_Fibroblast_Primary_Cells_skin01__H3K4me1	1.63185e-08	1.30763e-08	0.106025	0.538079
Breast_Myoepithelial_Primary_Cells__H3K4me3	5.12306e-08	4.11515e-08	0.106579	0.538079
Foreskin_Fibroblast_Primary_Cells_skin01__H3K4me3	3.88669e-08	3.12415e-08	0.106736	0.538079
NHLF_Lung_Fibroblast_Primary_Cells__DNase	3.64435e-08	3.03728e-08	0.115094	0.574297
Rectal_Smooth_Muscle__H3K9ac	6.91825e-08	5.83758e-08	0.117984	0.582772
Artery-Coronary_ENTEX__H3K27ac	1.48623e-08	1.29005e-08	0.124645	0.609516
Primary_B_cells_from_peripheral_blood__H3K4me1	1.3998e-08	1.25e-08	0.131391	0.627914
NHDF-Ad_Adult_Dermal_Fibroblast_Primary_Cells__H3K36me3	4.66298e-08	4.16998e-08	0.131735	0.627914
HMEC_Mammary_Epithelial_Primary_Cells__H3K36me3	2.58687e-08	2.31846e-08	0.13226	0.627914
NHLF_Lung_Fibroblast_Primary_Cells__H3K27ac	2.33481e-08	2.18731e-08	0.142889	0.669456
Foreskin_Keratinocyte_Primary_Cells_skin02__H3K4me3	6.00185e-08	5.6428e-08	0.143748	0.669456
NHLF_Lung_Fibroblast_Primary_Cells__H3K9ac	6.15668e-08	5.94426e-08	0.150163	0.692732
Foreskin_Melanocyte_Primary_Cells_skin03__H3K36me3	1.12093e-08	1.1111e-08	0.156525	0.715335
Esoph-Muscularis_ENTEX__H3K4me3	5.91134e-08	5.95227e-08	0.160325	0.725915
Rectal_Smooth_Muscle__H3K4me3	5.71087e-08	5.85086e-08	0.164514	0.738049
Esoph-Muscularis_ENTEX__H3K36me3	2.61332e-08	2.72038e-08	0.168366	0.748461
Heart-LV_ENTEX__H3K36me3	3.75313e-08	3.96712e-08	0.172059	0.757989
NHLF_Lung_Fibroblast_Primary_Cells__H3K4me3	7.38422e-08	7.92976e-08	0.175874	0.761354
Placenta_Amnion__H3K36me3	1.71881e-08	1.84627e-08	0.175937	0.761354
Colonic_Mucosa__H3K4me3	5.25523e-08	5.70551e-08	0.178505	0.765691
Small_Intestine__H3K4me3	6.43624e-08	7.04539e-08	0.18048	0.767431
Fetal_Stomach__H3K4me3	6.76424e-08	7.66041e-08	0.188615	0.791241
Primary_B_cells_from_peripheral_blood__H3K27ac	1.95778e-08	2.22368e-08	0.189315	0.791241
Osteoblast_Primary_Cells__H3K4me3	3.86113e-08	4.44271e-08	0.192398	0.797312
Primary_hematopoietic_stem_cells__H3K4me3	5.50352e-08	6.38899e-08	0.194507	0.799277
Ovary__H3K36me3	1.90772e-08	2.23537e-08	0.196712	0.801602
Primary_B_cells_from_peripheral_blood__DNase	2.63879e-08	3.12893e-08	0.199516	0.806307
liver_ENTEX__H3K4me1	4.23105e-08	5.06188e-08	0.201615	0.808114
Duodenum_Smooth_Muscle__H3K36me3	1.65294e-08	2.00277e-08	0.204593	0.810748
Colon-Sigm_ENTEX__H3K4me1	7.07388e-08	8.60753e-08	0.205588	0.810748
Foreskin_Fibroblast_Primary_Cells_skin02__H3K4me3	1.91447e-08	2.39987e-08	0.212512	0.82597
Primary_hematopoietic_stem_cells_G-CSF-mobilized_Male__H3K36me3	9.00024e-09	1.12976e-08	0.212827	0.82597
Colon-Sigm_ENTEX__H3K27ac	1.4794e-08	1.90986e-08	0.219285	0.844333
Esoph-Muscularis_ENTEX__H3K27ac	1.41537e-08	1.91542e-08	0.229974	0.878573
Psoas_Muscle__H3K4me1	1.68232e-08	2.32817e-08	0.234965	0.89068
Foreskin_Fibroblast_Primary_Cells_skin01__DNase	2.03699e-08	2.91103e-08	0.242043	0.910453
Primary_hematopoietic_stem_cells_short_term_culture__H3K36me3	8.57698e-09	1.23903e-08	0.244396	0.912288
Heart-Atrial_ENTEX__H3K4me1	5.81023e-08	8.46833e-08	0.246321	0.912508
Foreskin_Fibroblast_Primary_Cells_skin02__H3K27ac	1.28201e-08	1.8936e-08	0.249195	0.913533
Primary_Natural_Killer_cells_from_peripheral_blood__H3K4me3	3.57048e-08	5.30187e-08	0.250334	0.913533
Gastric__H3K4me1	1.77863e-08	2.70806e-08	0.255658	0.926049
Right_Ventricle__H3K36me3	1.81524e-08	2.84418e-08	0.261662	0.939475
Primary_hematopoietic_stem_cells_G-CSF-mobilized_Female__H3K36me3	8.19127e-09	1.30256e-08	0.264721	0.939475
Artery-Tibial_ENTEX__H3K4me1	2.94216e-08	4.68783e-08	0.265128	0.939475
Fetal_Intestine_Large__H3K36me3	9.29512e-09	1.54341e-08	0.273505	0.962188
Stomach_Smooth_Muscle__H3K36me3	1.31291e-08	2.20269e-08	0.275572	0.962534
Primary_T_helper_naive_cells_from_peripheral_blood_2__H3K36me3	1.29482e-08	2.27536e-08	0.284657	0.987214
Colon-TV_ENTEX__H3K36me3	1.36599e-08	2.51677e-08	0.293649	0.999998
Esoph-GJ_ENTEX__H3K27ac	9.17388e-09	1.70688e-08	0.295473	0.999998
Primary_T_killer_memory_cells_from_peripheral_blood__H3K27ac	1.62732e-08	3.0349e-08	0.29591	0.999998
Esoph-Mucosa_ENTEX__H3K4me3	1.99742e-08	3.77612e-08	0.298416	0.999998
liver_ENTEX__H3K36me3	9.63679e-09	1.91027e-08	0.306965	0.999998
Esophagus__H3K4me1	1.28816e-08	2.576e-08	0.308516	0.999998
Foreskin_Fibroblast_Primary_Cells_skin01__H3K27ac	8.59497e-09	1.77268e-08	0.313888	0.999998
Pancreas_ENTEX__H3K36me3	8.42131e-09	1.75164e-08	0.315341	0.999998
Breast_variant_Human_Mammary_Epithelial_Cells_(vHMEC)__H3K36me3	5.12597e-09	1.0795e-08	0.317448	0.999998
Primary_B_cells_from_cord_blood__H3K4me1	7.04844e-09	1.49864e-08	0.319062	0.999998
Primary_T_helper_cells_from_peripheral_blood__H3K36me3	6.0841e-09	1.30679e-08	0.320759	0.999998
Fetal_Muscle_Trunk__DNase	1.25043e-08	2.92231e-08	0.334365	0.999998
Esoph-Mucosa_ENTEX__H3K36me3	1.04758e-08	2.50908e-08	0.33815	0.999998
Pancreatic_Islets__H3K4me1	5.82672e-09	1.40209e-08	0.338861	0.999998
Duodenum_Smooth_Muscle__H3K4me3	1.16669e-08	2.81359e-08	0.339194	0.999998
Primary_T_killer_naive_cells_from_peripheral_blood__H3K9ac	1.81836e-08	4.76347e-08	0.351331	0.999998
NHDF-Ad_Adult_Dermal_Fibroblast_Primary_Cells__DNase	1.12801e-08	2.98418e-08	0.352716	0.999998
Fetal_Adrenal_Gland__DNase	1.19865e-08	3.18629e-08	0.353388	0.999998
Foreskin_Melanocyte_Primary_Cells_skin03__H3K4me1	4.18826e-09	1.11752e-08	0.353911	0.999998
HMEC_Mammary_Epithelial_Primary_Cells__H3K4me3	2.21598e-08	5.92407e-08	0.354179	0.999998
Primary_T_cells_from_cord_blood__H3K36me3	1.30469e-08	3.58818e-08	0.358075	0.999998
Primary_T_helper_cells_PMA-I_stimulated__H3K36me3	4.99483e-09	1.40112e-08	0.360738	0.999998
HMEC_Mammary_Epithelial_Primary_Cells__H3K27ac	5.80867e-09	1.65754e-08	0.363004	0.999998
skeletal_muscle_ENTEX__H3K36me3	4.6876e-09	1.41742e-08	0.370431	0.999998
Adipose_Nuclei__H3K27ac	3.81861e-09	1.16655e-08	0.371705	0.999998
Placenta_Amnion__H3K4me3	2.24665e-08	6.98259e-08	0.373821	0.999998
Placenta__H3K36me3	4.62623e-09	1.44165e-08	0.374144	0.999998
NHEK-Epidermal_Keratinocyte_Primary_Cells__H3K9ac	7.86446e-09	2.76742e-08	0.388136	0.999998
Adrenal_gland_ENTEX__H3K4me1	4.13918e-09	1.49083e-08	0.390644	0.999998
HMEC_Mammary_Epithelial_Primary_Cells__H3K9ac	8.43943e-09	3.13304e-08	0.393823	0.999998
Sigmoid_Colon__H3K4me3	1.75456e-08	6.58762e-08	0.394988	0.999998
Foreskin_Keratinocyte_Primary_Cells_skin03__H3K4me3	1.10375e-08	4.33838e-08	0.399588	0.999998
Fetal_Intestine_Large__H3K4me3	1.40375e-08	6.11164e-08	0.409168	0.999998
Fetal_Adrenal_Gland__H3K4me1	3.30841e-09	1.4842e-08	0.411803	0.999998
Primary_T_regulatory_cells_from_peripheral_blood__H3K36me3	4.22111e-09	1.89388e-08	0.411814	0.999998
NHEK-Epidermal_Keratinocyte_Primary_Cells__H3K4me3	9.32926e-09	4.23379e-08	0.412798	0.999998
Primary_hematopoietic_stem_cells_G-CSF-mobilized_Female__H3K27ac	4.15088e-09	1.98493e-08	0.417177	0.999998
Breast_variant_Human_Mammary_Epithelial_Cells_(vHMEC)__H3K4me1	2.76755e-09	1.34885e-08	0.418716	0.999998
Vagina_ENTEX__H3K27ac	2.96893e-09	1.5931e-08	0.42608	0.999998
Stomach_ENTEX__H3K4me3	1.02221e-08	5.50775e-08	0.426381	0.999998
NHEK-Epidermal_Keratinocyte_Primary_Cells__DNase	4.88999e-09	2.82396e-08	0.431263	0.999998
Primary_T_cells_from_cord_blood__DNase	6.35613e-09	3.6711e-08	0.431271	0.999998
NHDF-Ad_Adult_Dermal_Fibroblast_Primary_Cells__H3K9ac	8.76064e-09	5.23888e-08	0.433597	0.999998
Foreskin_Melanocyte_Primary_Cells_skin01__H3K36me3	4.12111e-09	2.49707e-08	0.434457	0.999998
Liver__H3K27ac	3.27056e-09	2.29998e-08	0.443461	0.999998
Prostate_ENTEX__H3K4me3	1.07975e-08	7.84167e-08	0.445241	0.999998
Foreskin_Fibroblast_Primary_Cells_skin02__H3K36me3	2.10194e-09	1.5479e-08	0.445993	0.999998
Breast_variant_Human_Mammary_Epithelial_Cells_(vHMEC)__DNase	3.70327e-09	2.92942e-08	0.449701	0.999998
Primary_hematopoietic_stem_cells_G-CSF-mobilized_Male__DNase	4.62225e-09	3.89887e-08	0.452814	0.999998
Primary_T_helper_naive_cells_from_peripheral_blood_1__H3K36me3	2.4092e-09	2.04765e-08	0.45317	0.999998
Aorta_ENTEX__H3K36me3	1.28145e-09	1.31494e-08	0.461183	0.999998
Primary_hematopoietic_stem_cells_short_term_culture__H3K4me3	5.43472e-09	5.57735e-08	0.461187	0.999998
Primary_hematopoietic_stem_cells_G-CSF-mobilized_Male__H3K4me3	3.21126e-09	3.47651e-08	0.463202	0.999998
Vagina_ENTEX__H3K4me3	5.83669e-09	6.64389e-08	0.464998	0.999998
Esoph-GJ_ENTEX__H3K4me1	1.12109e-09	1.31231e-08	0.46596	0.999998
Artery-Coronary_ENTEX__H3K4me3	2.465e-09	3.19519e-08	0.469253	0.999998
Primary_hematopoietic_stem_cells_G-CSF-mobilized_Female__H3K4me3	3.66929e-09	5.05987e-08	0.471095	0.999998
NHLF_Lung_Fibroblast_Primary_Cells__H3K36me3	2.37265e-09	3.48525e-08	0.472862	0.999998
Adipose_Nuclei__H3K4me1	1.02282e-09	1.51751e-08	0.473131	0.999998
Foreskin_Keratinocyte_Primary_Cells_skin03__H3K27ac	1.1228e-09	1.67077e-08	0.47321	0.999998
Fetal_Adrenal_Gland__H3K4me3	4.52697e-09	8.04322e-08	0.477558	0.999998
Primary_mononuclear_cells_from_peripheral_blood__H3K4me3	3.3674e-09	6.16328e-08	0.478214	0.999998
Primary_T_helper_cells_from_peripheral_blood__H3K4me3	2.37967e-09	4.4116e-08	0.478491	0.999998
Spleen__H3K27ac	7.42244e-10	2.04746e-08	0.485541	0.999998
Stomach_Mucosa__H3K9ac	1.04683e-09	3.33503e-08	0.48748	0.999998
NHEK-Epidermal_Keratinocyte_Primary_Cells__H3K4me1	3.57315e-10	1.22702e-08	0.488384	0.999998
Primary_T_helper_memory_cells_from_peripheral_blood_2__H3K27ac	4.48841e-10	2.23451e-08	0.491987	0.999998
Cortex_derived_primary_cultured_neurospheres__H3K36me3	2.42139e-10	1.9028e-08	0.494923	0.999998
Gastric__H3K27ac	2.99849e-10	2.75214e-08	0.495654	0.999998
Spleen_ENTEX__H3K27ac	9.24474e-11	9.15473e-09	0.495971	0.999998
Lung__H3K4me3	5.74358e-10	6.30321e-08	0.496365	0.999998
Foreskin_Melanocyte_Primary_Cells_skin01__H3K4me1	6.52323e-12	3.74997e-08	0.499931	0.999998
Pancreatic_Islets__H3K36me3	-1.91372e-10	3.08619e-08	0.502474	0.999998
Fetal_Muscle_Leg__H3K4me1	-1.48786e-10	1.38352e-08	0.50429	0.999998
NHEK-Epidermal_Keratinocyte_Primary_Cells__H3K36me3	-1.93982e-10	1.58737e-08	0.504875	0.999998
Primary_hematopoietic_stem_cells__H3K4me1	-4.25441e-10	2.46447e-08	0.506887	0.999998
Fetal_Muscle_Leg__DNase	-5.56476e-10	2.55676e-08	0.508682	0.999998
Breast_variant_Human_Mammary_Epithelial_Cells_(vHMEC)__H3K4me3	-1.91782e-09	6.38164e-08	0.511987	0.999998
Stomach_Mucosa__H3K36me3	-1.87027e-09	3.77538e-08	0.519755	0.999998
Foreskin_Keratinocyte_Primary_Cells_skin02__H3K36me3	-8.5069e-10	1.59962e-08	0.521206	0.999998
Ovary__DNase	-1.45909e-09	2.73984e-08	0.521235	0.999998
Foreskin_Melanocyte_Primary_Cells_skin03__H3K27ac	-1.02099e-09	1.77199e-08	0.522974	0.999998
Foreskin_Keratinocyte_Primary_Cells_skin03__H3K4me1	-8.93348e-10	1.29745e-08	0.527447	0.999998
Right_Atrium__H3K36me3	-2.79785e-09	4.02588e-08	0.527703	0.999998
Foreskin_Fibroblast_Primary_Cells_skin01__H3K36me3	-8.56727e-10	1.18398e-08	0.528842	0.999998
Esoph-Mucosa_ENTEX__H3K4me1	-1.1394e-09	1.52962e-08	0.529689	0.999998
Prostate_ENTEX__H3K27ac	-1.43209e-09	1.82329e-08	0.531302	0.999998
Ovary_ENTEX__H3K4me3	-7.08923e-09	6.58288e-08	0.54288	0.999998
HMEC_Mammary_Epithelial_Primary_Cells__H3K4me1	-1.56489e-09	1.42584e-08	0.543697	0.999998
Adrenal_gland_ENTEX__H3K4me3	-5.02801e-09	4.51337e-08	0.544351	0.999998
Foreskin_Melanocyte_Primary_Cells_skin01__H3K27ac	-6.14985e-09	4.24356e-08	0.557614	0.999998
Spleen_ENTEX__H3K36me3	-1.37269e-09	8.93661e-09	0.561039	0.999998
Foreskin_Keratinocyte_Primary_Cells_skin02__H3K4me1	-2.92807e-09	1.87053e-08	0.562195	0.999998
Primary_T_helper_17_cells_PMA-I_stimulated__H3K27ac	-3.54661e-09	2.19995e-08	0.564037	0.999998
Ovary__H3K4me3	-8.6388e-09	5.32511e-08	0.564437	0.999998
Primary_T_killer_naive_cells_from_peripheral_blood__H3K36me3	-3.82226e-09	2.29264e-08	0.566204	0.999998
skeletal_muscle_ENTEX__H3K4me3	-3.64317e-09	2.17842e-08	0.566409	0.999998
Duodenum_Mucosa__H3K9ac	-6.82935e-09	3.91091e-08	0.569312	0.999998
Fetal_Stomach__H3K4me1	-2.73863e-09	1.55624e-08	0.569844	0.999998
Mammary_ENTEX__H3K4me1	-5.58874e-09	3.02642e-08	0.573254	0.999998
NHDF-Ad_Adult_Dermal_Fibroblast_Primary_Cells__H3K27ac	-5.06878e-09	2.66596e-08	0.575396	0.999998
Pancreas__H3K4me3	-1.26345e-08	6.5223e-08	0.576799	0.999998
Primary_T_helper_17_cells_PMA-I_stimulated__H3K4me3	-6.79314e-09	3.49956e-08	0.576957	0.999998
Fetal_Brain_Female__H3K36me3	-4.19011e-09	2.14885e-08	0.577301	0.999998
Fetal_Adrenal_Gland__H3K36me3	-2.94914e-09	1.3554e-08	0.586124	0.999998
Spleen__H3K4me1	-4.19836e-09	1.92431e-08	0.586354	0.999998
Ganglion_Eminence_derived_primary_cultured_neurospheres__H3K36me3	-4.701e-09	2.13496e-08	0.587139	0.999998
Primary_T_helper_17_cells_PMA-I_stimulated__H3K4me1	-3.24866e-09	1.43848e-08	0.589337	0.999998
Small_Intestine__H3K36me3	-1.0807e-08	4.72706e-08	0.590418	0.999998
Fetal_Intestine_Large__H3K4me1	-3.11912e-09	1.28539e-08	0.595865	0.999998
NHEK-Epidermal_Keratinocyte_Primary_Cells__H3K27ac	-4.31182e-09	1.71013e-08	0.599531	0.999998
Foreskin_Keratinocyte_Primary_Cells_skin02__DNase	-5.85753e-09	2.3004e-08	0.600496	0.999998
Primary_T_cells_from_peripheral_blood__H3K4me3	-1.24787e-08	4.59465e-08	0.607032	0.999998
Fetal_Stomach__DNase	-1.20213e-08	4.31039e-08	0.609836	0.999998
Adipose_Nuclei__H3K9ac	-1.08237e-08	3.74159e-08	0.613816	0.999998
Fetal_Adrenal_Gland__H3K27ac	-4.08674e-09	1.3592e-08	0.618168	0.999998
Primary_T_helper_cells_PMA-I_stimulated__H3K4me1	-3.73671e-09	1.24218e-08	0.618223	0.999998
Primary_T_cells_from_peripheral_blood__H3K36me3	-4.18356e-09	1.30713e-08	0.625538	0.999998
Fetal_Intestine_Small__DNase	-1.36539e-08	4.08048e-08	0.631042	0.999998
Aorta__H3K36me3	-1.75065e-08	5.15436e-08	0.632938	0.999998
Stomach_Mucosa__H3K4me1	-4.25278e-09	1.2415e-08	0.634032	0.999998
Lung__H3K4me1	-7.6453e-09	2.23034e-08	0.63412	0.999998
Fetal_Intestine_Small__H3K4me1	-4.61242e-09	1.32342e-08	0.636276	0.999998
Brain_Germinal_Matrix__H3K36me3	-9.40264e-09	2.65223e-08	0.638524	0.999998
Fetal_Muscle_Trunk__H3K4me1	-5.06576e-09	1.35992e-08	0.645241	0.999998
Thymus__H3K4me3	-2.08161e-08	5.51717e-08	0.647023	0.999998
Thyroid_gland_ENTEX__H3K36me3	-8.20934e-09	2.13201e-08	0.6499	0.999998
Pancreas__H3K4me1	-7.30532e-09	1.65209e-08	0.670823	0.999998
Fetal_Stomach__H3K27ac	-7.70428e-09	1.63251e-08	0.681511	0.999998
Colon-TV_ENTEX__H3K27ac	-6.14357e-09	1.2871e-08	0.683433	0.999998
Thyroid_gland_ENTEX__H3K4me1	-4.92209e-09	1.01248e-08	0.686567	0.999998
Gastric__DNase	-2.33148e-08	4.75281e-08	0.688127	0.999998
Primary_neutrophils_from_peripheral_blood__H3K4me1	-5.43528e-09	1.10176e-08	0.68911	0.999998
Primary_neutrophils_from_peripheral_blood__H3K36me3	-4.27266e-09	8.54945e-09	0.691377	0.999998
HMEC_Mammary_Epithelial_Primary_Cells__DNase	-1.34567e-08	2.60447e-08	0.697309	0.999998
Adrenal_gland_ENTEX__H3K27ac	-5.919e-09	1.14013e-08	0.698173	0.999998
Primary_T_helper_cells_from_peripheral_blood__H3K4me1	-6.90755e-09	1.31987e-08	0.699635	0.999998
Thyroid_gland_ENTEX__H3K27ac	-4.95092e-09	9.33208e-09	0.702127	0.999998
Primary_T_regulatory_cells_from_peripheral_blood__H3K27ac	-9.37159e-09	1.74558e-08	0.704323	0.999998
Lung_ENTEX__H3K4me3	-3.71251e-08	6.85251e-08	0.706013	0.999998
NHDF-Ad_Adult_Dermal_Fibroblast_Primary_Cells__H3K4me3	-3.51807e-08	6.42835e-08	0.707905	0.999998
Esophagus__H3K4me3	-3.42795e-08	5.99248e-08	0.716353	0.999998
Fetal_Stomach__H3K36me3	-7.86656e-09	1.37455e-08	0.716441	0.999998
Fetal_Kidney__H3K4me1	-2.06302e-08	3.56326e-08	0.718695	0.999998
Adipose_Nuclei__H3K4me3	-1.59847e-08	2.75324e-08	0.719237	0.999998
Fetal_Kidney__DNase	-2.21448e-08	3.74615e-08	0.722785	0.999998
Uterus_ENTEX__H3K27ac	-6.41494e-09	1.05731e-08	0.727982	0.999998
Sigmoid_Colon__H3K4me1	-2.18932e-08	3.53805e-08	0.731974	0.999998
Fetal_Lung__H3K4me1	-7.81736e-09	1.25076e-08	0.734017	0.999998
Primary_monocytes_from_peripheral_blood__H3K4me1	-7.22347e-09	1.15264e-08	0.734569	0.999998
Small_Intestine__H3K27ac	-1.57086e-08	2.48588e-08	0.736279	0.999998
Placenta__H3K4me3	-3.95925e-08	6.23123e-08	0.737412	0.999998
Primary_T_helper_17_cells_PMA-I_stimulated__H3K36me3	-9.33962e-09	1.45254e-08	0.739883	0.999998
Primary_T_helper_memory_cells_from_peripheral_blood_1__H3K4me3	-2.58429e-08	4.01762e-08	0.739965	0.999998
Primary_neutrophils_from_peripheral_blood__H3K4me3	-1.58725e-08	2.44366e-08	0.742005	0.999998
Primary_hematopoietic_stem_cells_G-CSF-mobilized_Male__H3K4me1	-8.39705e-09	1.24967e-08	0.74919	0.999998
Primary_T_killer_naive_cells_from_peripheral_blood__H3K4me3	-3.3829e-08	4.96353e-08	0.752239	0.999998
Fetal_Thymus__H3K36me3	-6.69446e-09	9.74724e-09	0.753897	0.999998
Fetal_Intestine_Small__H3K4me3	-3.78079e-08	5.49679e-08	0.754216	0.999998
Skin_tissue_ENTEX__H3K4me3	-4.06925e-08	5.91293e-08	0.754335	0.999998
SI-Term-Ileum_ENTEX__H3K4me1	-1.4399e-08	2.08701e-08	0.754882	0.999998
Primary_T_helper_naive_cells_from_peripheral_blood_1__H3K4me3	-2.60641e-08	3.6858e-08	0.760263	0.999998
Artery-Tibial_ENTEX__H3K36me3	-1.31178e-08	1.84936e-08	0.760936	0.999998
Fetal_Brain_Male__H3K36me3	-4.73426e-08	6.58722e-08	0.763838	0.999998
Primary_T_helper_memory_cells_from_peripheral_blood_2__H3K4me1	-9.53623e-09	1.32405e-08	0.764308	0.999998
Primary_T_helper_naive_cells_from_peripheral_blood__H3K9ac	-2.85599e-08	3.91894e-08	0.766928	0.999998
Rectal_Mucosa_Donor_29__H3K9ac	-3.22958e-08	4.42858e-08	0.767078	0.999998
Foreskin_Melanocyte_Primary_Cells_skin01__DNase	-1.88408e-08	2.48447e-08	0.775876	0.999998
Thyroid_gland_ENTEX__H3K4me3	-3.09823e-08	4.07973e-08	0.776199	0.999998
Primary_T_helper_naive_cells_from_peripheral_blood_2__H3K4me1	-9.37812e-09	1.23105e-08	0.776909	0.999998
Foreskin_Keratinocyte_Primary_Cells_skin03__H3K36me3	-6.74314e-09	8.8423e-09	0.777149	0.999998
Primary_Natural_Killer_cells_from_peripheral_blood__H3K36me3	-1.13333e-08	1.47581e-08	0.778739	0.999998
Primary_T_helper_naive_cells_from_peripheral_blood_2__H3K27ac	-1.28802e-08	1.67679e-08	0.778801	0.999998
Fetal_Brain_Male__H3K4me1	-1.07978e-08	1.39564e-08	0.78044	0.999998
Pancreas_ENTEX__H3K4me3	-3.61679e-08	4.51045e-08	0.788686	0.999998
Brain_Substantia_Nigra__H3K36me3	-2.56662e-08	3.19813e-08	0.788879	0.999998
Primary_T_helper_memory_cells_from_peripheral_blood_1__H3K36me3	-1.6211e-08	2.00717e-08	0.790355	0.999998
Primary_mononuclear_cells_from_peripheral_blood__H3K27ac	-3.53517e-08	4.33214e-08	0.79276	0.999998
Rectal_Mucosa_Donor_31__H3K36me3	-1.55041e-08	1.82334e-08	0.802424	0.999998
Stomach_Mucosa__H3K4me3	-5.10236e-08	5.84817e-08	0.808524	0.999998
Primary_T_helper_memory_cells_from_peripheral_blood_1__H3K27ac	-2.10078e-08	2.4019e-08	0.809113	0.999998
Pancreas__H3K27ac	-2.79795e-08	3.18297e-08	0.81031	0.999998
Fetal_Intestine_Large__H3K27ac	-1.2049e-08	1.36973e-08	0.810479	0.999998
Liver__H3K4me1	-1.24287e-08	1.41288e-08	0.810481	0.999998
Breast_Myoepithelial_Primary_Cells__H3K9ac	-3.31623e-08	3.74684e-08	0.811942	0.999998
Esophagus__H3K36me3	-2.09613e-08	2.3649e-08	0.812286	0.999998
Primary_T_helper_memory_cells_from_peripheral_blood_1__H3K4me1	-1.22091e-08	1.36407e-08	0.814621	0.999998
Nerve-Tibial_ENTEX__H3K36me3	-1.78715e-08	1.96876e-08	0.817995	0.999998
Lung__H3K27ac	-2.01372e-08	2.20897e-08	0.819013	0.999998
Primary_T_helper_cells_PMA-I_stimulated__H3K27ac	-1.16395e-08	1.26284e-08	0.821655	0.999998
Primary_hematopoietic_stem_cells_G-CSF-mobilized_Female__H3K4me1	-1.00409e-08	1.08475e-08	0.822684	0.999998
Primary_T_killer_memory_cells_from_peripheral_blood__H3K36me3	-2.1984e-08	2.37402e-08	0.822783	0.999998
Primary_T_helper_naive_cells_from_peripheral_blood_1__H3K27ac	-3.16828e-08	3.38117e-08	0.82563	0.999998
Fetal_Lung__H3K9ac	-3.99715e-08	4.05439e-08	0.837904	0.999998
Fetal_Thymus__H3K4me3	-4.97211e-08	5.00009e-08	0.839987	0.999998
Liver__H3K36me3	-1.09253e-08	1.08658e-08	0.842666	0.999998
Rectal_Mucosa_Donor_31__H3K27ac	-1.8627e-08	1.83758e-08	0.84463	0.999998
Spleen_ENTEX__H3K4me1	-3.63348e-08	3.56134e-08	0.846197	0.999998
Adrenal_gland_ENTEX__H3K36me3	-1.70997e-08	1.67366e-08	0.846537	0.999998
Duodenum_Mucosa__H3K4me1	-1.82007e-08	1.76996e-08	0.848099	0.999998
Pancreas__H3K36me3	-2.40496e-08	2.32061e-08	0.84998	0.999998
Primary_T_killer_memory_cells_from_peripheral_blood__H3K4me1	-1.70118e-08	1.63365e-08	0.851141	0.999998
Primary_monocytes_from_peripheral_blood__DNase	-3.33003e-08	3.19035e-08	0.851707	0.999998
Primary_T_helper_cells_from_peripheral_blood__H3K27ac	-2.17919e-08	2.08382e-08	0.852165	0.999998
Thymus__H3K4me1	-1.99711e-08	1.90849e-08	0.85232	0.999998
Primary_T_regulatory_cells_from_peripheral_blood__H3K4me3	-3.75007e-08	3.56395e-08	0.853651	0.999998
Ovary_ENTEX__H3K36me3	-7.64325e-08	7.17352e-08	0.856671	0.999998
Fetal_Kidney__H3K9ac	-7.61671e-08	7.13067e-08	0.857276	0.999998
Rectal_Smooth_Muscle__H3K36me3	-4.73183e-08	4.38513e-08	0.85972	0.999998
Liver__H3K9ac	-3.51149e-08	3.2141e-08	0.862699	0.999998
Colon-TV_ENTEX__H3K4me3	-4.99422e-08	4.56226e-08	0.863172	0.999998
Thymus__H3K36me3	-2.91217e-08	2.65445e-08	0.863699	0.999998
Primary_mononuclear_cells_from_peripheral_blood__H3K9ac	-3.56466e-08	3.22911e-08	0.865185	0.999998
Primary_T_regulatory_cells_from_peripheral_blood__H3K4me1	-1.6899e-08	1.50307e-08	0.869557	0.999998
Fetal_Brain_Male__H3K4me3	-1.03491e-07	9.15451e-08	0.870866	0.999998
Primary_hematopoietic_stem_cells_short_term_culture__H3K4me1	-1.55961e-08	1.37378e-08	0.871869	0.999998
Fetal_Intestine_Small__H3K27ac	-1.71341e-08	1.50066e-08	0.873226	0.999998
Colon-TV_ENTEX__H3K4me1	-3.32398e-08	2.90749e-08	0.873532	0.999998
Foreskin_Melanocyte_Primary_Cells_skin01__H3K4me3	-4.99991e-08	4.37215e-08	0.873601	0.999998
Stomach_ENTEX__H3K27ac	-1.50306e-08	1.30443e-08	0.875396	0.999998
Small_Intestine__DNase	-3.30791e-08	2.84156e-08	0.877812	0.999998
Rectal_Mucosa_Donor_29__H3K4me3	-4.18255e-08	3.56806e-08	0.879446	0.999998
Primary_monocytes_from_peripheral_blood__H3K27ac	-2.26655e-08	1.92138e-08	0.88093	0.999998
Ganglion_Eminence_derived_primary_cultured_neurospheres__H3K4me3	-5.14283e-08	4.35431e-08	0.881216	0.999998
Primary_T_killer_memory_cells_from_peripheral_blood__H3K4me3	-5.13615e-08	4.33801e-08	0.881791	0.999998
Primary_T_cells_from_cord_blood__H3K4me3	-5.92415e-08	4.97494e-08	0.883134	0.999998
Rectal_Mucosa_Donor_29__H3K27ac	-2.30363e-08	1.86424e-08	0.891713	0.999998
Primary_T_helper_naive_cells_from_peripheral_blood_1__H3K4me1	-1.79093e-08	1.44238e-08	0.892817	0.999998
Primary_T_cells_effector_memory_enriched_from_peripheral_blood__H3K4me3	-5.27404e-08	4.22359e-08	0.894115	0.999998
Fetal_Kidney__H3K4me3	-9.35592e-08	7.38419e-08	0.897426	0.999998
Mammary_ENTEX__H3K4me3	-4.27369e-08	3.35384e-08	0.898716	0.999998
Primary_T_helper_naive_cells_from_peripheral_blood_2__H3K4me3	-4.72298e-08	3.61193e-08	0.904496	0.999998
SI-Term-Ileum_ENTEX__H3K4me3	-5.04392e-08	3.84357e-08	0.905291	0.999998
Pancreatic_Islets__H3K27ac	-4.96136e-08	3.72938e-08	0.908297	0.999998
Rectal_Mucosa_Donor_31__H3K9ac	-3.74022e-08	2.80833e-08	0.908542	0.999998
Pancreas__DNase	-4.11176e-08	3.06685e-08	0.909993	0.999998
Primary_T_helper_cells_PMA-I_stimulated__H3K4me3	-3.4322e-08	2.53503e-08	0.912117	0.999998
Testis_ENTEX__H3K27ac	-1.37831e-08	1.01765e-08	0.912196	0.999998
Fetal_Brain_Female__H3K4me3	-6.52364e-08	4.80485e-08	0.912723	0.999998
Nerve-Tibial_ENTEX__H3K4me3	-7.67915e-08	5.59159e-08	0.915177	0.999998
Duodenum_Mucosa__H3K4me3	-4.68538e-08	3.40087e-08	0.915852	0.999998
Rectal_Mucosa_Donor_31__H3K4me1	-2.385e-08	1.73017e-08	0.915972	0.999998
Foreskin_Melanocyte_Primary_Cells_skin03__H3K4me3	-6.49326e-08	4.70849e-08	0.916061	0.999998
Primary_T_cells_from_peripheral_blood__H3K4me1	-1.96621e-08	1.41608e-08	0.917506	0.999998
Testis_ENTEX__H3K4me3	-3.52431e-08	2.49527e-08	0.921083	0.999998
Primary_T_helper_memory_cells_from_peripheral_blood_2__H3K36me3	-3.95587e-08	2.78614e-08	0.922173	0.999998
Fetal_Intestine_Large__DNase	-4.32876e-08	3.04404e-08	0.922493	0.999998
Duodenum_Mucosa__H3K36me3	-2.20083e-08	1.53764e-08	0.923828	0.999998
Pancreatic_Islets__H3K4me3	-7.89039e-08	5.48634e-08	0.92481	0.999998
Pancreatic_Islets__H3K9ac	-1.00606e-07	6.8975e-08	0.927661	0.999998
Rectal_Mucosa_Donor_31__H3K4me3	-6.33608e-08	4.34193e-08	0.927756	0.999998
Colonic_Mucosa__H3K4me1	-3.61898e-08	2.46732e-08	0.92878	0.999998
SI-Term-Ileum_ENTEX__H3K36me3	-5.9307e-08	4.00193e-08	0.930825	0.999998
Primary_T_cells_effector_memory_enriched_from_peripheral_blood__H3K36me3	-2.55172e-08	1.71339e-08	0.931793	0.999998
Prostate_ENTEX__H3K36me3	-1.3094e-07	8.79168e-08	0.931805	0.999998
Primary_hematopoietic_stem_cells_G-CSF-mobilized_Female__DNase	-4.99163e-08	3.31758e-08	0.933787	0.999998
Primary_mononuclear_cells_from_peripheral_blood__H3K36me3	-2.11796e-08	1.40731e-08	0.933834	0.999998
Primary_T_killer_naive_cells_from_peripheral_blood__H3K4me1	-1.9435e-08	1.28975e-08	0.934079	0.999998
Primary_T_cells_effector_memory_enriched_from_peripheral_blood__H3K4me1	-3.06186e-08	2.02527e-08	0.934712	0.999998
Mammary_ENTEX__H3K27ac	-2.22893e-08	1.46895e-08	0.935413	0.999998
Fetal_Lung__H3K4me3	-7.86348e-08	5.17767e-08	0.935585	0.999998
Mammary_ENTEX__H3K36me3	-2.68001e-08	1.74689e-08	0.937505	0.999998
Colonic_Mucosa__H3K27ac	-3.32176e-08	2.1479e-08	0.93901	0.999998
SI-Term-Ileum_ENTEX__H3K27ac	-2.03764e-08	1.30512e-08	0.940769	0.999998
Primary_T_cells_effector_memory_enriched_from_peripheral_blood__H3K27ac	-3.26443e-08	2.09002e-08	0.940846	0.999998
Nerve-Tibial_ENTEX__H3K27ac	-1.39529e-08	8.92299e-09	0.941057	0.999998
Thymus__H3K27ac	-4.35774e-08	2.78548e-08	0.941144	0.999998
Sigmoid_Colon__H3K27ac	-3.85757e-08	2.45258e-08	0.942124	0.999998
Cortex_derived_primary_cultured_neurospheres__H3K4me3	-7.63262e-08	4.80298e-08	0.943986	0.999998
Testis_ENTEX__H3K36me3	-9.55966e-08	6.01161e-08	0.944105	0.999998
Sigmoid_Colon__H3K36me3	-4.30652e-08	2.66941e-08	0.946659	0.999998
Nerve-Tibial_ENTEX__H3K4me1	-2.24016e-08	1.38138e-08	0.947564	0.999998
Primary_T_cells_from_peripheral_blood__H3K27ac	-2.95681e-08	1.79369e-08	0.95037	0.999998
Cortex_derived_primary_cultured_neurospheres__H3K4me1	-2.69775e-08	1.63181e-08	0.950857	0.999998
Rectal_Mucosa_Donor_29__H3K4me1	-4.01168e-08	2.3109e-08	0.958716	0.999998
Brain_Germinal_Matrix__H3K4me1	-5.04962e-08	2.86601e-08	0.960957	0.999998
Colonic_Mucosa__H3K9ac	-8.67682e-08	4.87393e-08	0.962483	0.999998
Brain_Angular_Gyrus__H3K36me3	-5.41526e-08	3.03441e-08	0.962838	0.999998
Spleen_ENTEX__H3K4me3	-3.74776e-08	2.09671e-08	0.963067	0.999998
Fetal_Intestine_Small__H3K36me3	-1.9759e-08	1.0911e-08	0.964924	0.999998
Primary_T_killer_naive_cells_from_peripheral_blood__H3K27ac	-5.64614e-08	3.11358e-08	0.965114	0.999998
Brain_Germinal_Matrix__H3K4me3	-8.26648e-08	4.51858e-08	0.966333	0.999998
Fetal_Lung__DNase	-4.48878e-08	2.4533e-08	0.966352	0.999998
Pancreas_ENTEX__H3K4me1	-1.52451e-08	8.24825e-09	0.96772	0.999998
liver_ENTEX__H3K27ac	-3.04907e-08	1.6462e-08	0.968001	0.999998
Primary_monocytes_from_peripheral_blood__H3K4me3	-9.31242e-08	5.00892e-08	0.968498	0.999998
Lung__H3K36me3	-4.10987e-08	2.19668e-08	0.969324	0.999998
Primary_T_helper_memory_cells_from_peripheral_blood_2__H3K4me3	-7.67753e-08	4.08676e-08	0.969853	0.999998
Spleen__H3K36me3	-3.63505e-08	1.9299e-08	0.970187	0.999998
Primary_mononuclear_cells_from_peripheral_blood__H3K4me1	-8.70317e-08	4.57766e-08	0.971364	0.999998
Brain_Hippocampus_Middle__H3K36me3	-3.84531e-08	2.00496e-08	0.972438	0.999998
Gastric__H3K36me3	-4.15415e-08	2.07723e-08	0.977242	0.999998
Stomach_ENTEX__H3K4me1	-3.0281e-08	1.50565e-08	0.977845	0.999998
Brain_Cingulate_Gyrus__H3K36me3	-5.29645e-08	2.6323e-08	0.977895	0.999998
Stomach_ENTEX__H3K36me3	-3.15858e-08	1.55449e-08	0.978918	0.999998
Ganglion_Eminence_derived_primary_cultured_neurospheres__H3K4me1	-4.34079e-08	2.13043e-08	0.979201	0.999998
Brain_Anterior_Caudate__H3K36me3	-4.39048e-08	2.14193e-08	0.979807	0.999998
Primary_Natural_Killer_cells_from_peripheral_blood__H3K27ac	-3.63133e-08	1.76749e-08	0.980037	0.999998
Fetal_Brain_Female__H3K4me1	-4.43347e-08	2.14312e-08	0.980713	0.999998
Primary_monocytes_from_peripheral_blood__H3K36me3	-1.98473e-08	9.36618e-09	0.982957	0.999998
Brain_Dorsolateral_Prefrontal_Cortex__H3K4me3	-9.94812e-08	4.67944e-08	0.983245	0.999998
Adipose_Nuclei__H3K36me3	-3.63593e-08	1.69768e-08	0.983892	0.999998
Fetal_Thymus__H3K4me1	-2.29337e-08	1.06766e-08	0.984145	0.999998
Fetal_Brain_Male__DNase	-6.54278e-08	3.043e-08	0.984227	0.999998
Fetal_Thymus__DNase	-5.65927e-08	2.6043e-08	0.985112	0.999998
Rectal_Mucosa_Donor_29__H3K36me3	-4.68614e-08	2.13084e-08	0.986068	0.999998
Fetal_Thymus__H3K27ac	-3.33875e-08	1.51607e-08	0.986176	0.999998
Brain_Hippocampus_Middle__H3K4me1	-2.2935e-08	1.02827e-08	0.987141	0.999998
Fetal_Brain_Female__DNase	-7.03204e-08	3.03463e-08	0.989755	0.999998
Lung_ENTEX__H3K36me3	-3.5283e-08	1.5211e-08	0.989818	0.999998
Brain_Dorsolateral_Prefrontal_Cortex__H3K36me3	-6.05117e-08	2.60112e-08	0.990001	0.999998
Brain_Hippocampus_Middle__H3K4me3	-8.195e-08	3.50659e-08	0.990281	0.999998
Liver__H3K4me3	-5.55018e-08	2.36459e-08	0.990543	0.999998
Primary_T_cells_from_cord_blood__H3K4me1	-4.94096e-08	2.09185e-08	0.990912	0.999998
Brain_Angular_Gyrus__H3K4me3	-1.25704e-07	5.31558e-08	0.99098	0.999998
Gastric__H3K4me3	-9.8555e-08	4.13298e-08	0.991451	0.999998
Colonic_Mucosa__H3K36me3	-6.85619e-08	2.81206e-08	0.992619	0.999998
liver_ENTEX__H3K4me3	-8.42196e-08	3.27103e-08	0.994984	0.999998
Brain_Cingulate_Gyrus__H3K4me3	-1.21458e-07	4.59839e-08	0.995871	0.999998
Brain_Substantia_Nigra__H3K4me3	-1.10072e-07	4.14361e-08	0.996051	0.999998
Pancreas_ENTEX__H3K27ac	-2.72031e-08	9.8783e-09	0.997055	0.999998
Brain_Dorsolateral_Prefrontal_Cortex__H3K9ac	-1.3811e-07	4.90882e-08	0.99755	0.999998
Brain_Inferior_Temporal_Lobe__H3K4me1	-5.30058e-08	1.85792e-08	0.997834	0.999998
Primary_T_cells_from_peripheral_blood__DNase	-8.34155e-08	2.90322e-08	0.997968	0.999998
Brain_Inferior_Temporal_Lobe__H3K4me3	-1.20965e-07	4.06597e-08	0.998535	0.999998
Brain_Inferior_Temporal_Lobe__H3K36me3	-5.95118e-08	1.99345e-08	0.998584	0.999998
Brain_Substantia_Nigra__H3K9ac	-1.00065e-07	3.30543e-08	0.998766	0.999998
Brain_Anterior_Caudate__H3K4me3	-1.28428e-07	4.18888e-08	0.998915	0.999998
Brain_Substantia_Nigra__H3K4me1	-3.75967e-08	1.22121e-08	0.99896	0.999998
Brain_Cingulate_Gyrus__H3K4me1	-4.35244e-08	1.39328e-08	0.999108	0.999998
Lung_ENTEX__H3K4me1	-4.44392e-08	1.42168e-08	0.999113	0.999998
Primary_Natural_Killer_cells_from_peripheral_blood__H3K4me1	-3.71401e-08	1.17682e-08	0.9992	0.999998
Primary_Natural_Killer_cells_from_peripheral_blood__DNase	-9.57565e-08	3.02843e-08	0.999216	0.999998
Brain_Anterior_Caudate__H3K9ac	-1.02941e-07	3.21623e-08	0.999315	0.999998
Brain_Dorsolateral_Prefrontal_Cortex__H3K4me1	-6.04856e-08	1.8724e-08	0.999382	0.999998
Brain_Substantia_Nigra__H3K27ac	-3.81024e-08	1.14753e-08	0.999551	0.999998
Brain_Angular_Gyrus__H3K4me1	-5.29495e-08	1.56582e-08	0.99964	0.999998
Brain_Anterior_Caudate__H3K27ac	-4.74005e-08	1.34638e-08	0.999785	0.999998
Brain_Angular_Gyrus__H3K9ac	-1.29697e-07	3.6727e-08	0.999793	0.999998
Brain_Inferior_Temporal_Lobe__H3K9ac	-1.0754e-07	3.02453e-08	0.999811	0.999998
Brain_Cingulate_Gyrus__H3K9ac	-1.38539e-07	3.89498e-08	0.999812	0.999998
Brain_Inferior_Temporal_Lobe__H3K27ac	-4.84142e-08	1.31252e-08	0.999887	0.999998
Brain_Anterior_Caudate__H3K4me1	-5.21095e-08	1.37706e-08	0.999923	0.999998
Brain_Hippocampus_Middle__H3K27ac	-4.50669e-08	1.14797e-08	0.999957	0.999998
Brain_Dorsolateral_Prefrontal_Cortex__H3K27ac	-6.50663e-08	1.64967e-08	0.99996	0.999998
Lung_ENTEX__H3K27ac	-5.08894e-08	1.23887e-08	0.99998	0.999998
Brain_Angular_Gyrus__H3K27ac	-6.88138e-08	1.62998e-08	0.999988	0.999998
Brain_Cingulate_Gyrus__H3K27ac	-6.24481e-08	1.33969e-08	0.999998	0.999998

## Sheet: STable14_Multi_tissue_gene_expr
Name	Coefficient	Coefficient_std_error	Coefficient_P_value	FDR
A07.541.560.Heart.Ventricles	6.24668e-09	1.67785e-09	9.84239e-05	0.0109651
A07.541.Heart	6.13348e-09	1.65683e-09	0.000106977	0.0109651
A07.541.358.Heart.Atria	4.44276e-09	1.6257e-09	0.00313963	0.214542
A07.541.358.100.Atrial.Appendage	4.00586e-09	1.70544e-09	0.00941514	0.435774
A10.690.467.Muscle..Smooth	3.68922e-09	1.60165e-09	0.0106286	0.435774
Muscle_Skeletal	3.17838e-09	1.50838e-09	0.0175522	0.599699
A15.145.846.Serum	3.54365e-09	1.75694e-09	0.0218506	0.639911
A05.360.319.679.690.Myometrium	2.79251e-09	1.43645e-09	0.0259456	0.657873
A05.360.319.679.Uterus	2.70947e-09	1.46054e-09	0.0317895	0.657873
A11.436.275.Endothelial.Cells	3.88196e-09	2.098e-09	0.0321343	0.657873
A11.620.520.Myocytes..Smooth.Muscle	3.05454e-09	1.73236e-09	0.0389314	0.657873
A02.633.567.850.Quadriceps.Muscle	2.90338e-09	1.65172e-09	0.0393913	0.657873
Heart_Left_Ventricle	2.48079e-09	1.4453e-09	0.0430397	0.657873
A11.329.830.Stromal.Cells	2.65545e-09	1.58634e-09	0.0470701	0.657873
A07.231.908.670.874.Umbilical.Veins	2.8515e-09	1.76984e-09	0.0535721	0.657873
A02.835.232.834.151.Cervical.Vertebrae	2.74608e-09	1.71423e-09	0.0545856	0.657873
A11.118.637.555.567.562.440.Precursor.Cells..B.Lymphoid	2.898e-09	1.84541e-09	0.0581633	0.657873
Brain_Hypothalamus	1.87373e-09	1.22003e-09	0.062292	0.657873
A09.371.729.Retina	2.07783e-09	1.35379e-09	0.0624135	0.657873
A10.690.Muscles	2.32114e-09	1.55085e-09	0.0672362	0.657873
A05.360.319.679.490.Endometrium	2.32877e-09	1.55718e-09	0.0673919	0.657873
A04.411.Lung	2.38003e-09	1.62646e-09	0.0716901	0.668022
Heart_Atrial_Appendage	1.97079e-09	1.39654e-09	0.0790933	0.692081
A07.231.908.Veins	2.55666e-09	1.82851e-09	0.0810242	0.692081
A15.382.520.604.800.Palatine.Tonsil	2.32421e-09	1.74717e-09	0.0917145	0.752059
A02.165.Cartilage	1.97606e-09	1.53646e-09	0.0992026	0.782175
A15.382.520.604.700.Spleen	2.29003e-09	1.82485e-09	0.104755	0.795361
A11.872.Stem.Cells	2.44348e-09	2.01362e-09	0.112474	0.809836
Vagina	1.53932e-09	1.27998e-09	0.114562	0.809836
A11.872.190.Embryonic.Stem.Cells	1.90212e-09	1.66892e-09	0.127199	0.813979
Thyroid	1.62936e-09	1.45382e-09	0.131199	0.813979
A11.872.040.Adult.Stem.Cells	1.9708e-09	1.7705e-09	0.132825	0.813979
A11.329.228.Fibroblasts	1.59538e-09	1.47e-09	0.138896	0.813979
A07.231.114.Arteries	1.73803e-09	1.68043e-09	0.150503	0.813979
A10.615.284.473.Chorion	1.66643e-09	1.66245e-09	0.158078	0.813979
Brain_Amygdala	1.20378e-09	1.24496e-09	0.166792	0.813979
A15.382.490.555.567.537.Killer.Cells..Natural	1.81304e-09	1.8969e-09	0.16959	0.813979
A14.549.Mouth	1.68586e-09	1.80531e-09	0.175195	0.813979
A11.872.190.260.Embryoid.Bodies	1.65643e-09	1.7835e-09	0.176509	0.813979
Minor_Salivary_Gland	1.48182e-09	1.59603e-09	0.17659	0.813979
A05.360.319.887.Vulva	1.8125e-09	1.95967e-09	0.177509	0.813979
A07.231.Blood.Vessels	1.66659e-09	1.84848e-09	0.183635	0.813979
A10.615.550.599.Mouth.Mucosa	1.47418e-09	1.65446e-09	0.186455	0.813979
Uterus	1.4013e-09	1.61743e-09	0.193143	0.813979
A03.734.Pancreas	1.54393e-09	1.80097e-09	0.195646	0.813979
A11.872.653.Neural.Stem.Cells	1.74288e-09	2.04098e-09	0.196568	0.813979
Artery_Coronary	1.21471e-09	1.43832e-09	0.199186	0.813979
A11.329.171.Chondrocytes	1.36128e-09	1.61662e-09	0.199879	0.813979
Skin_Not_Sun_Exposed_(Suprapubic)	1.17033e-09	1.39396e-09	0.200574	0.813979
A15.382.490.555.567.Lymphocytes	1.64754e-09	1.96484e-09	0.200872	0.813979
Cervix_Ectocervix	1.27353e-09	1.52937e-09	0.202502	0.813979
A09.371.Eye	1.32659e-09	1.67063e-09	0.213578	0.838243
Esophagus_Mucosa	1.21061e-09	1.5695e-09	0.220254	0.838243
A11.872.700.500.Induced.Pluripotent.Stem.Cells	1.22989e-09	1.62163e-09	0.224097	0.838243
Pituitary	1.07211e-09	1.42761e-09	0.22633	0.838243
A05.810.890.Urinary.Bladder	1.34996e-09	1.88364e-09	0.236787	0.838243
A08.186.211.730.885.287.249.487.Corpus.Striatum	9.6007e-10	1.34343e-09	0.237415	0.838243
Bladder	1.00229e-09	1.40674e-09	0.238081	0.838243
A05.810.453.324.Kidney.Cortex	1.05666e-09	1.5046e-09	0.24125	0.838243
Artery_Tibial	8.9101e-10	1.33343e-09	0.251999	0.860998
Ovary	9.10694e-10	1.51566e-09	0.273968	0.920712
A06.407.312.Gonads	9.11657e-10	1.71494e-09	0.297503	0.976329
Brain_Anterior_cingulate_cortex_(BA24)	6.10204e-10	1.20645e-09	0.306503	0.976329
A17.815.Skin	8.25425e-10	1.69003e-09	0.31263	0.976329
A05.360.319.Genitalia..Female	7.6904e-10	1.63216e-09	0.318756	0.976329
A14.549.167.Dentition	7.43946e-10	1.59977e-09	0.320954	0.976329
A11.872.580.Mesenchymal.Stem.Cells	7.51516e-10	1.65393e-09	0.324777	0.976329
Nerve_Tibial	6.45755e-10	1.44109e-09	0.32704	0.976329
Brain_Substantia_nigra	4.64789e-10	1.15594e-09	0.343809	0.976329
A11.118.637.Leukocytes	7.23421e-10	1.83121e-09	0.346403	0.976329
A08.186.211.730.885.287.249.Basal.Ganglia	5.38273e-10	1.3886e-09	0.349142	0.976329
Brain_Frontal_Cortex_(BA9)	4.58378e-10	1.18547e-09	0.349502	0.976329
A15.145.229.Blood.Cells	7.42857e-10	1.9652e-09	0.352713	0.976329
Brain_Cortex	4.41601e-10	1.20276e-09	0.356751	0.976329
Colon_Sigmoid	5.281e-10	1.44301e-09	0.357194	0.976329
Adipose_Subcutaneous	4.55175e-10	1.43e-09	0.375127	0.990696
A11.443.Erythroid.Cells	5.09548e-10	1.67163e-09	0.380251	0.990696
Brain_Cerebellar_Hemisphere	3.42327e-10	1.17751e-09	0.385632	0.990696
A05.360.319.114.373.Fallopian.Tubes	4.78815e-10	1.84417e-09	0.397572	0.990696
A02.835.583.443.800.Synovial.Membrane	3.49812e-10	1.39115e-09	0.400731	0.990696
Artery_Aorta	3.31828e-10	1.35315e-09	0.403141	0.990696
Spleen	3.88821e-10	1.71679e-09	0.410414	0.990696
A05.360.319.114.630.Ovary	3.65417e-10	1.76409e-09	0.41795	0.990696
Brain_Nucleus_accumbens_(basal_ganglia)	2.08548e-10	1.22289e-09	0.432294	0.990696
A15.378.316.Bone.Marrow.Cells	2.94239e-10	2.02682e-09	0.442287	0.990696
A03.556.500.760.Salivary.Glands	2.57962e-10	1.7816e-09	0.442437	0.990696
A14.549.167.646.Periodontium	2.26076e-10	1.65361e-09	0.445627	0.990696
Brain_Hippocampus	1.29455e-10	1.19031e-09	0.456697	0.990696
A11.118.637.555.567.569.T.Lymphocytes	1.61485e-10	1.77198e-09	0.463694	0.990696
A03.556.500.760.464.Parotid.Gland	4.72717e-11	1.77049e-09	0.48935	0.990696
A11.329.Connective.Tissue.Cells	4.14058e-11	1.58478e-09	0.489578	0.990696
Brain_Cerebellum	2.35963e-11	1.16505e-09	0.491921	0.990696
A11.329.629.Osteoblasts	2.05561e-11	1.53034e-09	0.494641	0.990696
A15.145.229.188.Blood.Platelets	-5.40958e-11	1.58849e-09	0.513583	0.990696
Testis	-5.09721e-11	1.39423e-09	0.514582	0.990696
Colon_Transverse	-1.2621e-10	1.78368e-09	0.528205	0.990696
A15.145.Blood	-1.58512e-10	1.88113e-09	0.533577	0.990696
A06.407.Endocrine.Glands	-1.47757e-10	1.68244e-09	0.534991	0.990696
Cells_EBV-transformed_lymphocytes	-1.85402e-10	1.80437e-09	0.54092	0.990696
A10.272.497.Epidermis	-2.07064e-10	1.88135e-09	0.54382	0.990696
Brain_Putamen_(basal_ganglia)	-1.51428e-10	1.22586e-09	0.549155	0.990696
Liver	-2.04088e-10	1.61164e-09	0.550385	0.990696
Stomach	-2.26489e-10	1.73881e-09	0.551818	0.990696
A14.549.885.Tongue	-2.68214e-10	1.68525e-09	0.563226	0.990696
A05.360.319.679.256.Cervix.Uteri	-2.78079e-10	1.64461e-09	0.567135	0.990696
Brain_Caudate_(basal_ganglia)	-2.22615e-10	1.23269e-09	0.571657	0.990696
A15.382.490.315.583.Neutrophils	-4.05401e-10	1.91557e-09	0.583804	0.990696
A03.556.249.124.Ileum	-4.28368e-10	1.84781e-09	0.591663	0.990696
Cells_Transformed_fibroblasts	-3.47231e-10	1.43276e-09	0.595746	0.990696
A15.145.229.637.555.Leukocytes..Mononuclear	-5.12092e-10	2.0444e-09	0.598894	0.990696
A08.186.211.132.810.428.200.Cerebellum	-3.39332e-10	1.2661e-09	0.605656	0.990696
A11.627.635.Myeloid.Progenitor.Cells	-5.71941e-10	1.84565e-09	0.621676	0.990696
A15.382.490.555.567.622.Lymphocytes..Null	-6.77601e-10	1.8915e-09	0.639916	0.990696
A11.382.Endocrine.Cells	-6.1007e-10	1.67128e-09	0.642456	0.990696
A10.549.Lymphoid.Tissue	-6.73941e-10	1.83937e-09	0.642966	0.990696
A10.165.450.300.Cicatrix	-5.79731e-10	1.54603e-09	0.646163	0.990696
A11.118.637.555.567.569.200.700.T.Lymphocytes..Regulatory	-6.79803e-10	1.78266e-09	0.648525	0.990696
Small_Intestine_Terminal_Ileum	-6.2935e-10	1.64232e-09	0.649217	0.990696
A08.186.211.730.885.287.500.571.735.Visual.Cortex	-5.64601e-10	1.37064e-09	0.659803	0.990696
A11.436.294.064.Glucagon.Secreting.Cells	-6.94917e-10	1.68673e-09	0.659827	0.990696
A05.360.Genitalia	-7.17688e-10	1.5983e-09	0.673296	0.990696
A08.186.211.730.885.287.500.270.Frontal.Lobe	-6.63936e-10	1.47217e-09	0.674002	0.990696
A14.724.557.Nasopharynx	-8.1818e-10	1.61919e-09	0.693326	0.990696
A07.541.510.110.Aortic.Valve	-7.13607e-10	1.35099e-09	0.701323	0.990696
Breast_Mammary_Tissue	-7.7709e-10	1.40828e-09	0.709457	0.990696
A10.165.450.300.425.Keloid	-8.86727e-10	1.55599e-09	0.71562	0.990696
A15.145.229.637.555.567.569.200.CD4.Positive.T.Lymphocytes	-9.75084e-10	1.70505e-09	0.716298	0.990696
A15.382.680.Phagocytes	-1.10561e-09	1.93022e-09	0.716608	0.990696
Lung	-9.12841e-10	1.57736e-09	0.718609	0.990696
A11.436.329.Granulosa.Cells	-8.39226e-10	1.4407e-09	0.719889	0.990696
Skin_Sun_Exposed_(Lower_leg)	-8.64801e-10	1.39035e-09	0.73303	0.990696
A10.549.400.Lymph.Nodes	-1.17631e-09	1.80999e-09	0.74212	0.990696
A08.186.211.865.428.Metencephalon	-8.5915e-10	1.30324e-09	0.74513	0.990696
A03.556.875.500.Esophagus	-1.18269e-09	1.77736e-09	0.747109	0.990696
Pancreas	-1.06242e-09	1.58219e-09	0.749045	0.990696
Kidney_Cortex	-1.02275e-09	1.51376e-09	0.750363	0.990696
A03.734.414.Islets.of.Langerhans	-1.14041e-09	1.66361e-09	0.753488	0.990696
A15.145.300.Fetal.Blood	-1.53288e-09	2.22777e-09	0.754298	0.990696
A14.724.Pharynx	-1.03019e-09	1.48576e-09	0.755964	0.990696
Esophagus_Muscularis	-1.07093e-09	1.4645e-09	0.767689	0.990696
A11.118.637.555.567.562.B.Lymphocytes	-1.38045e-09	1.878e-09	0.76885	0.990696
A11.872.378.590.635.Granulocyte.Macrophage.Progenitor.Cells	-1.26176e-09	1.70745e-09	0.770039	0.990696
A08.186.211.730.885.287.500.670.Parietal.Lobe	-1.01727e-09	1.37102e-09	0.770951	0.990696
Cervix_Endocervix	-1.13552e-09	1.52907e-09	0.771144	0.990696
A11.872.378.Hematopoietic.Stem.Cells	-1.34916e-09	1.79931e-09	0.773319	0.990696
A11.872.378.590.817.Megakaryocyte.Erythroid.Progenitor.Cells	-1.19706e-09	1.59449e-09	0.773599	0.990696
Brain_Spinal_cord_(cervical_c-1)	-8.73495e-10	1.13398e-09	0.779437	0.990696
A10.615.789.Serous.Membrane	-1.33745e-09	1.66493e-09	0.789101	0.990696
Esophagus_Gastroesophageal_Junction	-1.16037e-09	1.44235e-09	0.789447	0.990696
A05.360.490.Germ.Cells	-1.13519e-09	1.40281e-09	0.790808	0.990696
A11.436.Epithelial.Cells	-1.44239e-09	1.7657e-09	0.793004	0.990696
A03.556.249.249.356.Colon	-1.48625e-09	1.79935e-09	0.795595	0.990696
Adipose_Visceral_(Omentum)	-1.14985e-09	1.37386e-09	0.798688	0.990696
Adrenal_Gland	-1.32177e-09	1.56407e-09	0.800968	0.990696
A03.556.124.684.Intestine..Small	-1.41616e-09	1.65049e-09	0.804561	0.990696
A03.556.249.249.209.Cecum	-1.50732e-09	1.65482e-09	0.818818	0.990696
A08.186.211.653.Mesencephalon	-1.3835e-09	1.48731e-09	0.823867	0.990696
A11.627.624.249.Monocyte.Macrophage.Precursor.Cells	-1.67689e-09	1.74303e-09	0.83199	0.990696
A03.556.249.249.356.668.Colon..Sigmoid	-1.82963e-09	1.86827e-09	0.836289	0.990696
A15.382.812.Mononuclear.Phagocyte.System	-1.81856e-09	1.82719e-09	0.8402	0.990696
A15.382.Immune.System	-1.70711e-09	1.71205e-09	0.840645	0.990696
A06.407.071.140.Adrenal.Cortex	-1.56877e-09	1.5666e-09	0.84168	0.990696
A11.497.497.600.Oocytes	-1.48055e-09	1.45536e-09	0.845497	0.990696
A06.407.900.Thyroid.Gland	-1.58336e-09	1.50146e-09	0.854183	0.990696
A10.336.707.Prostate	-1.51122e-09	1.39547e-09	0.860584	0.990696
A08.186.211.464.405.Hippocampus	-1.45954e-09	1.30651e-09	0.86803	0.990696
A08.186.211.730.317.Diencephalon	-1.71593e-09	1.48917e-09	0.875396	0.990696
A08.186.211.132.Brain.Stem	-1.45861e-09	1.26509e-09	0.875538	0.990696
A08.186.211.Brain	-1.53691e-09	1.32423e-09	0.877098	0.990696
A05.360.444.Genitalia..Male	-1.5555e-09	1.32635e-09	0.879555	0.990696
A15.382.812.260.Dendritic.Cells	-2.10606e-09	1.72672e-09	0.888708	0.990696
A04.531.520.Nasal.Mucosa	-2.01626e-09	1.64678e-09	0.889593	0.990696
A08.186.211.730.317.357.352.435.Hypothalamo.Hypophyseal.System	-2.06583e-09	1.68428e-09	0.890003	0.990696
A03.556.124.Intestines	-2.19566e-09	1.77436e-09	0.892037	0.990696
A11.329.114.Adipocytes	-2.12508e-09	1.71703e-09	0.892076	0.990696
A11.329.372.600.Macrophages..Alveolar	-1.93081e-09	1.54179e-09	0.894773	0.990696
A08.186.211.730.885.287.500.Cerebral.Cortex	-1.64286e-09	1.30676e-09	0.895661	0.990696
A10.165.114.830.750.Subcutaneous.Fat	-2.00438e-09	1.57119e-09	0.89897	0.990696
A11.436.348.Hepatocytes	-2.32962e-09	1.78847e-09	0.90364	0.990696
A11.627.340.360.Granulocyte.Precursor.Cells	-2.39018e-09	1.81271e-09	0.906343	0.990696
A08.186.211.464.710.225.Entorhinal.Cortex	-1.71694e-09	1.2956e-09	0.907449	0.990696
A03.620.Liver	-2.33595e-09	1.76101e-09	0.907661	0.990696
A11.436.397.Keratinocytes	-2.16953e-09	1.62812e-09	0.908658	0.990696
A10.165.114.830.500.750.Subcutaneous.Fat..Abdominal	-2.12324e-09	1.54499e-09	0.915321	0.990696
A15.378.316.580.Monocytes	-2.63106e-09	1.89992e-09	0.916947	0.990696
A15.145.229.637.555.567.562.725.Plasma.Cells	-2.37386e-09	1.71281e-09	0.917119	0.990696
Prostate	-1.97611e-09	1.40901e-09	0.919614	0.990696
A02.835.583.443.800.800.Synovial.Fluid	-2.76411e-09	1.945e-09	0.922361	0.990696
A05.810.453.Kidney	-2.06915e-09	1.41591e-09	0.92804	0.990696
A05.360.444.492.362.Foreskin	-2.15908e-09	1.36611e-09	0.942999	0.990696
A08.186.211.464.Limbic.System	-2.1388e-09	1.31643e-09	0.947886	0.990696
A03.556.124.526.767.Rectum	-2.76897e-09	1.68432e-09	0.949909	0.990696
A03.556.Gastrointestinal.Tract	-2.8967e-09	1.72266e-09	0.953669	0.990696
A10.272.Epithelium	-2.87176e-09	1.70732e-09	0.953718	0.990696
A03.556.124.369.Intestinal.Mucosa	-3.08681e-09	1.82982e-09	0.954193	0.990696
A06.407.312.782.Testis	-2.33567e-09	1.30358e-09	0.963412	0.990696
A10.615.Membranes	-3.02404e-09	1.59128e-09	0.971309	0.990696
Whole_Blood	-3.38577e-09	1.74899e-09	0.973557	0.990696
A10.615.550.Mucous.Membrane	-3.30429e-09	1.64181e-09	0.977921	0.990696
Fallopian_Tube	-2.89261e-09	1.37896e-09	0.982033	0.990696
A03.556.875.875.Stomach	-3.5191e-09	1.67249e-09	0.982315	0.990696
A06.407.071.Adrenal.Glands	-3.29404e-09	1.56216e-09	0.982512	0.990696
A08.186.211.730.317.357.Hypothalamus	-3.39351e-09	1.60161e-09	0.982947	0.990696
A03.556.875.Upper.Gastrointestinal.Tract	-4.14918e-09	1.83047e-09	0.988296	0.990696
A15.382.812.522.Macrophages	-3.82643e-09	1.62598e-09	0.990696	0.990696
