# Supplementary material for: Genomic structural equation modeling reveals shared genetic structure of cardiac function and structure-function association studies of CLCNKA mutations
Source: Research Square preprint supplement (doi:10.21203/rs.3.rs-7363435/v1), 2025-09-19
Supplement: Supplementary file 7 [file 3126c4fefa01a640c179b93d.xlsx]

## Sheet: Sheet1
Category	GeneSet	N_genes	N_overlap	p	adjP	genes	link
GO_cc	GOCC_I_BAND	135	3	4.23476e-05	0.0427287	TTN:BAG3:FHOD3	http://www.gsea-msigdb.org/gsea/msigdb/human/geneset/GOCC_I_BAND
GWAScatalog	Hypertrophic cardiomyopathy	18	5	1.12137e-13	4.96205e-10	HSPB7:PROB1:DNAJC18:BAG3:FHOD3
GWAScatalog	Electrocardiogram morphology (amplitude at temporal datapoints)	380	8	1.15915e-12	2.56461e-09	HSPB7:CLCNKA:TTN:SLC23A1:PROB1:SPATA24:BAG3:FHOD3
GWAScatalog	Hypertrophic cardiomyopathy (MTAG)	13	4	2.92228e-11	4.31037e-08	HSPB7:DNAJC18:BAG3:FHOD3
GWAScatalog	Hypertrophic cardiomyopathy (sarcomere negative)	22	4	2.98283e-10	3.29975e-07	HSPB7:TTN:BAG3:FHOD3
GWAScatalog	Left ventricular end-diastolic volume	4	3	4.38255e-10	3.87856e-07	CLCNKA:TTN:BAG3
GWAScatalog	Left ventricular ejection fraction	6	3	2.19005e-09	1.61516e-06	CLCNKA:TTN:BAG3
GWAScatalog	Left ventricular global radial strain	7	3	3.83151e-09	2.42206e-06	CLCNKA:TTN:BAG3
GWAScatalog	Left ventricular end-systolic volume	9	3	9.19046e-09	5.08347e-06	CLCNKA:TTN:BAG3
GWAScatalog	Left ventricular global circumferential strain	10	3	1.31256e-08	6.4534e-06	CLCNKA:TTN:BAG3
GWAScatalog	Dilated cardiomyopathy (MTAG)	13	3	3.12563e-08	1.38309e-05	TTN:BAG3:FHOD3
GWAScatalog	Dilated cardiomyopathy	8	2	7.17143e-06	0.00288487	BAG3:FHOD3
GWAScatalog	Malaria	306	4	1.35753e-05	0.00500589	SLC23A1:PROB1:SPATA24:DNAJC18
Positional_gene_sets	chr5q31	180	4	1.65605e-06	0.000496814	SLC23A1:PROB1:SPATA24:DNAJC18	http://www.gsea-msigdb.org/gsea/msigdb/human/geneset/chr5q31
