# Supplementary material for: Genomic structural equation modeling reveals shared genetic structure of cardiac function and structure-function association studies of CLCNKA mutations
Source: Research Square preprint supplement (doi:10.21203/rs.3.rs-7363435/v1), 2025-09-19
Supplement: Supplementary file 8 [file 3c44c4b9ca5162e046521fcc.docx]

Table 5 Gene-based association results identified by FUMA (FDR < 0.05)

| Chr | Start position | End position | Sample size | Z score | Pval | Gene symbol | FDR |
| --- | --- | --- | --- | --- | --- | --- | --- |
| 1 | 2143360 | 2145620 | 167970 | 4.51 | 3.30E-06 | AL590822.1 | 4.71E-03 |
| 1 | 16174359 | 16266955 | 167970 | 4.22 | 1.23E-05 | SPEN | 1.37E-02 |
| 1 | 16340523 | 16346089 | 167970 | 6.38 | 9.05E-11 | HSPB7 | 1.55E-06 |
| 1 | 16345370 | 16360545 | 167970 | 4.78 | 8.64E-07 | CLCNKA | 1.64E-03 |
| 2 | 55774428 | 55846015 | 167970 | 3.82 | 6.78E-05 | SMEK2 | 4.47E-02 |
| 2 | 55861400 | 55921045 | 167970 | 4.06 | 2.50E-05 | PNPT1 | 2.38E-02 |
| 2 | 179316163 | 179326117 | 167970 | 3.82 | 6.66E-05 | DFNB59 | 4.47E-02 |
| 2 | 179345195 | 179381189 | 167970 | 4.60 | 2.07E-06 | PLEKHA3 | 3.55E-03 |
| 2 | 179390716 | 179695529 | 167970 | 5.65 | 7.85E-09 | TTN | 4.49E-05 |
| 3 | 158288952 | 158325041 | 167970 | 3.79 | 7.43E-05 | MLF1 | 4.53E-02 |
| 5 | 132387654 | 132442141 | 167970 | 3.81 | 7.04E-05 | HSPA4 | 4.47E-02 |
| 5 | 138702885 | 138720242 | 167970 | 5.51 | 1.81E-08 | SLC23A1 | 7.76E-05 |
| 5 | 138727635 | 138730885 | 167970 | 5.40 | 3.41E-08 | PROB1 | 9.73E-05 |
| 5 | 138732252 | 138739777 | 167970 | 5.26 | 7.18E-08 | SPATA24 | 1.76E-04 |
| 5 | 138744279 | 138780180 | 167970 | 5.43 | 2.77E-08 | DNAJC18 | 9.50E-05 |
| 7 | 128430811 | 128462186 | 167970 | 4.53 | 2.95E-06 | CCDC136 | 4.59E-03 |
| 8 | 10581278 | 10697357 | 167970 | 3.86 | 5.59E-05 | SOX7 | 4.16E-02 |
| 8 | 10582909 | 10697357 | 167970 | 3.86 | 5.59E-05 | SOX7 | 4.16E-02 |
| 8 | 10622473 | 10697394 | 167970 | 3.79 | 7.67E-05 | PINX1 | 4.53E-02 |
| 8 | 11225911 | 11296167 | 167970 | 4.21 | 1.28E-05 | C8orf12 | 1.37E-02 |
| 10 | 121410882 | 121437331 | 167970 | 5.97 | 1.20E-09 | BAG3 | 1.03E-05 |
| 17 | 45000483 | 45105003 | 167970 | 3.96 | 3.81E-05 | GOSR2 | 3.11E-02 |
| 17 | 45000499 | 45124520 | 167970 | 3.96 | 3.77E-05 | RP11-156P1.2 | 3.11E-02 |
| 17 | 45195069 | 45266788 | 167970 | 4.14 | 1.74E-05 | CDC27 | 1.76E-02 |
| 17 | 45277812 | 45301045 | 167970 | 4.02 | 2.87E-05 | MYL4 | 2.59E-02 |
| 18 | 33877677 | 34360018 | 167970 | 4.82 | 7.08E-07 | FHOD3 | 1.52E-03 |
| 20 | 36838890 | 36889174 | 167970 | 3.82 | 6.58E-05 | KIAA1755 | 4.47E-02 |
| 22 | 24129150 | 24176703 | 167970 | 4.34 | 7.24E-06 | SMARCB1 | 9.54E-03 |
| 22 | 24176690 | 24181315 | 167970 | 4.30 | 8.54E-06 | DERL3 | 1.05E-02 |
