# Supplementary material for: Genomic structural equation modeling reveals shared genetic structure of cardiac function and structure-function association studies of CLCNKA mutations
Source: Research Square preprint supplement (doi:10.21203/rs.3.rs-7363435/v1), 2025-09-19
Supplement: Supplementary file 9 [file 5ffe7c56841d1cc61e5c3205.xlsx]

## Sheet: Sheet1
GENE	SYMBOL	CHR	START	STOP	ZSTAT	P	P_bon
ENSG00000173641	HSPB7	1	16340523	16346089	6.3766	9.0546e-11	1.55151e-06
ENSG00000186510	CLCNKA	1	16345370	16360545	4.783	8.6365e-07	0.0147986
ENSG00000116095	PLEKHA3	2	179345195	179381189	4.6043	2.0695e-06	0.0354609
ENSG00000155657	TTN	2	179390716	179695529	5.6537	7.8534e-09	0.000134568
ENSG00000170482	SLC23A1	5	138702885	138720242	5.5084	1.8109e-08	0.000310298
ENSG00000228672	PROB1	5	138727635	138730885	5.396	3.4067e-08	0.000583738
ENSG00000170469	SPATA24	5	138732252	138739777	5.2606	7.1785e-08	0.00123004
ENSG00000170464	DNAJC18	5	138744279	138780180	5.4329	2.7717e-08	0.000474931
ENSG00000151929	BAG3	10	121410882	121437331	5.9677	1.2032e-09	2.06168e-05
ENSG00000134775	FHOD3	18	33877677	34360018	4.8226	7.0841e-07	0.0121386
