# Supplementary material for: Genomic structural equation modeling reveals shared genetic structure of cardiac function and structure-function association studies of CLCNKA mutations
Source: Research Square preprint supplement (doi:10.21203/rs.3.rs-7363435/v1), 2025-09-19
Supplement: Supplementary file 10 [file 78fabf511f43a81a252ce95c.xlsx]

## Sheet: Sheet1
PANEL	FILE	ID	CHR	P0	P1	HSQ	BEST.GWAS.ID	BEST.GWAS.Z	EQTL.ID	EQTL.R2	EQTL.Z	EQTL.GWAS.Z	NSNP	NWGT	MODEL	MODELCV.R2	MODELCV.PV	TWAS.Z	TWAS.P	COLOC.PP0	COLOC.PP1	COLOC.PP2	COLOC.PP3	COLOC.PP4	tissue
sCCA3	../03.reference/FUSION/sCCA_weights_v8///sCCA3/sCCA3.ENSG00000173641.17.wgt.RDat	ENSG00000173641.17	1	16019593	16019594	0.2683	rs945425	6.59	rs945416	0.251	-9.34	6.39045	384	4	lasso	0.27	1.6e-22	-6.66743	2.6e-11	0	0	0	0.008	0.992	sCCA3
sCCA1	../03.reference/FUSION/sCCA_weights_v8///sCCA1/sCCA1.ENSG00000173641.17.wgt.RDat	ENSG00000173641.17	1	16019593	16019594	0.4337	rs945425	6.59	rs945419	0.448592	11.9	6.25922	384	44	enet	0.49	2.3e-46	6.60274	4.04e-11	0	0	0	0.011	0.989	sCCA1
sCCA3	../03.reference/FUSION/sCCA_weights_v8///sCCA3/sCCA3.ENSG00000055070.16.wgt.RDat	ENSG00000055070.16	1	16352574	16352575	0.0603	rs945425	6.59	rs848195	0.0232	-4.15	-5.84032	269	1	top1	0.023	0.0045	5.84032	5.21e-09	0	0	0.842	0.038	0.119	sCCA3
sCCA1	../03.reference/FUSION/sCCA_weights_v8///sCCA1/sCCA1.ENSG00000228672.3.wgt.RDat	ENSG00000228672.3	5	139395712	139395713	0.3867	rs11950646	5.693	rs11242465	0.417575	11.58	5.19556	272	6	lasso	0.45	3e-41	5.66728	1.45e-08	0	0	0	0.044	0.956	sCCA1
sCCA1	../03.reference/FUSION/sCCA_weights_v8///sCCA1/sCCA1.ENSG00000170469.10.wgt.RDat	ENSG00000170469.10	5	139404087	139404088	0.3246	rs11950646	5.693	rs10900862	0.291325	-10.03	5.52778	273	28	enet	0.33	6.9e-29	-5.59939	2.15e-08	0	0	0	0.012	0.988	sCCA1
sCCA3	../03.reference/FUSION/sCCA_weights_v8///sCCA3/sCCA3.ENSG00000170482.16.wgt.RDat	ENSG00000170482.16	5	139384552	139384553	0.1101	rs11950646	5.693	rs10063949	0.0854	-5.86	5.57705	271	15	enet	0.091	4.4e-08	-5.55691	2.75e-08	0	0	0	0.014	0.986	sCCA3
sCCA3	../03.reference/FUSION/sCCA_weights_v8///sCCA3/sCCA3.ENSG00000228672.3.wgt.RDat	ENSG00000228672.3	5	139395712	139395713	0.135	rs11950646	5.693	rs10900862	0.12	-6.6	5.52778	272	1	top1	0.12	3.1e-10	-5.52778	3.24e-08	0	0	0	0.012	0.987	sCCA3
sCCA2	../03.reference/FUSION/sCCA_weights_v8///sCCA2/sCCA2.ENSG00000162458.12.wgt.RDat	ENSG00000162458.12	1	15756606	15756607	0.0976	rs945425	6.59	rs848209	0.078	5.34	-5.52628	438	1	top1	0.078	4.3e-07	-5.52628	3.27e-08	0	0	0.225	0.505	0.27	sCCA2
sCCA2	../03.reference/FUSION/sCCA_weights_v8///sCCA2/sCCA2.ENSG00000228672.3.wgt.RDat	ENSG00000228672.3	5	139395712	139395713	0.2765	rs11950646	5.693	rs11242465	0.332	10.12	5.19556	272	5	lasso	0.35	5.2e-30	5.51395	3.51e-08	0	0.001	0	0.072	0.927	sCCA2
sCCA3	../03.reference/FUSION/sCCA_weights_v8///sCCA3/sCCA3.ENSG00000170469.10.wgt.RDat	ENSG00000170469.10	5	139404087	139404088	0.0829	rs11950646	5.693	rs4075682	0.0897	5.64	5.48698	273	1	top1	0.09	5.8e-08	5.48698	4.09e-08	0	0	0.002	0.016	0.982	sCCA3
sCCA1	../03.reference/FUSION/sCCA_weights_v8///sCCA1/sCCA1.ENSG00000170482.16.wgt.RDat	ENSG00000170482.16	5	139384552	139384553	0.3622	rs11950646	5.693	rs6596475	0.377615	-10.9	5.16868	271	16	enet	0.39	1.3e-34	-5.45074	5.02e-08	0	0	0	0.026	0.974	sCCA1
sCCA1	../03.reference/FUSION/sCCA_weights_v8///sCCA1/sCCA1.ENSG00000237298.9.wgt.RDat	ENSG00000237298.9	2	178521182	178521183	0.0727	rs2042995	6.37	rs4894044	0.044108	-4.85	5.3	457	1	top1	0.044	0.00013	-5.29908	1.16e-07	0	0	0.547	0.197	0.256	sCCA1
sCCA1	../03.reference/FUSION/sCCA_weights_v8///sCCA1/sCCA1.ENSG00000170464.9.wgt.RDat	ENSG00000170464.9	5	139444490	139444491	0.5598	rs11950646	5.693	rs11242465	0.640452	-13.97	5.19249	270	1	top1	0.64	1.7e-69	-5.19249	2.07e-07	0	0.001	0	0.074	0.925	sCCA1
sCCA2	../03.reference/FUSION/sCCA_weights_v8///sCCA2/sCCA2.ENSG00000170464.9.wgt.RDat	ENSG00000170464.9	5	139444490	139444491	0.2265	rs11950646	5.693	rs11242465	0.268	-9.1	5.19249	270	1	top1	0.27	1.7e-22	-5.19249	2.07e-07	0	0.001	0	0.074	0.925	sCCA2
sCCA3	../03.reference/FUSION/sCCA_weights_v8///sCCA3/sCCA3.ENSG00000170464.9.wgt.RDat	ENSG00000170464.9	5	139444490	139444491	0.5346	rs11950646	5.693	rs11242465	0.56	13.07	5.19249	270	1	top1	0.56	4.2e-56	5.19249	2.07e-07	0	0.001	0	0.074	0.925	sCCA3
sCCA2	../03.reference/FUSION/sCCA_weights_v8///sCCA2/sCCA2.ENSG00000180228.12.wgt.RDat	ENSG00000180228.12	2	178451434	178451435	0.0427	rs2042995	6.37	rs13411588	0.0294	4.11	3.9646	467	7	lasso	0.03	0.0014	5.17658	2.26e-07	0	0	0.098	0.052	0.85	sCCA2
sCCA2	../03.reference/FUSION/sCCA_weights_v8///sCCA2/sCCA2.ENSG00000151923.17.wgt.RDat	ENSG00000151923.17	10	119597028	119597029	0.1062	rs2234962	7.69	rs12569630	0.017602	4.48	-3.20596	471	18	enet	0.025	0.003	-5.15694	2.51e-07	0	0	0.515	0.267	0.218	sCCA2
sCCA2	../03.reference/FUSION/sCCA_weights_v8///sCCA2/sCCA2.ENSG00000170873.18.wgt.RDat	ENSG00000170873.18	8	124728428	124728429	0.2836	rs7461129	5.77	rs12542527	0.157	-7.07	5.13725	508	1	top1	0.16	3.8e-13	-5.13725	2.79e-07	0	0.001	0	0.051	0.948	sCCA2
sCCA2	../03.reference/FUSION/sCCA_weights_v8///sCCA2/sCCA2.ENSG00000197771.12.wgt.RDat	ENSG00000197771.12	10	119892555	119892556	0.1067	rs2234962	7.69	rs11199152	0.013429	-4.5	2.62735	499	18	enet	0.03	0.0013	-5.11905	3.07e-07	0	0	0.11	0.097	0.792	sCCA2
