# Supplementary material for: Genomic structural equation modeling reveals shared genetic structure of cardiac function and structure-function association studies of CLCNKA mutations
Source: Research Square preprint supplement (doi:10.21203/rs.3.rs-7363435/v1), 2025-09-19
Supplement: Supplementary file 11 [file 79ecd4cc125335d4a4cfd0dd.docx]

Table S2 Multivariate LD Score Regression(h2(se))

| Phenotype | LVEF | LVSV | LS | RS | RVEF | NT-proBNP |
| --- | --- | --- | --- | --- | --- | --- |
| LVEF | 0.1954 (0.0342) | 0.0869 (0.1287) | 0.4242 (0.1123) | 0.4 (0.1468) | 0.6294 (0.1264) | 0.2212 (0.2726) |
| LVSV | 0.0869 (0.1287) | 0.1333 (0.0206) | 0.2533 (0.0946) | 0.026 (0.1482) | 0.097 (0.1201) | 0.3922 (0.2031) |
| LS | 0.4242 (0.1123) | 0.2533 (0.0946) | 0.1841 (0.0232) | 0.1075 (0.1185) | 0.3629 (0.0885) | 0.3293 (0.1994) |
| RS | 0.4  (0.1468) | 0.026 (0.1482) | 0.1075 (0.1185) | 0.1253 (0.0259) | 0.3226 (0.1455) | 0.2904 (0.2375) |
| RVEF | 0.6294 (0.1264) | 0.097 (0.1201) | 0.3629 (0.0885) | 0.3226 (0.1455) | 0.175 (0.0262) | 0.2157 (0.172) |
| NT-proBNP | 0.2212 (0.2726) | 0.3922 (0.2031) | 0.3293 (0.1994) | 0.2904 (0.2375) | 0.2157 (0.172) | 0.067 (0.0424) |

LVEF (Left Ventricular Ejection Fraction); LVSV (Left Ventricular Stroke Volume); LS (Longitudinal Strain); RS (Radial Strain); RVEF (Right Ventricular Ejection Fraction); NT-proBNP (N-terminal pro-Brain Natriuretic Peptide).
