# Supplementary material for: Genomic structural equation modeling reveals shared genetic structure of cardiac function and structure-function association studies of CLCNKA mutations
Source: Research Square preprint supplement (doi:10.21203/rs.3.rs-7363435/v1), 2025-09-19
Supplement: Supplementary file 13 [file b4f4c80572ae74fa9512b2dc.xlsx]

## Sheet: Sheet1
Novel	rsID	GenomicLocus	CHR	BP	nIndSigSNPs	IndSigSNPs	non_effect_allele	effect_allele	MAF	p	beta	se	nearestGene	dist	func	CADD	RDB	minChrState	commonChrState	Q	Q_df	Q_pval
No_LVEF,No_RS	rs945425	1	1	16348412	3	rs945425;rs643420;rs10927886	C	T	0.323062	4.28679e-11	0.037995	0.00576222	CLCNKA	0	UTR5	4.695	5	2	15	5.69808	5	0.336714
No_LVEF	rs2042995	2	2	179558366	1	rs2042995	C	T	0.245527	1.93433e-10	-0.0438927	0.00689435	TTN-AS1:TTN	00:00:00	exonic	21.4		4	15	11.4836	5	0.0425906
No_LVEF,No_RVEF	rs11950646	3	5	138714474	1	rs11950646	A	G	0.378728	1.24508e-08	0.0310437	0.00545255	SLC23A1	0	intronic	5.793	5	1	5	8.54673	5	0.128567
No_LVEF	rs34866937	4	8	125859850	1	rs34866937	A	G	0.337972	3.60108e-09	-0.0371413	0.00629349	RP11-1082L8.3	0	ncRNA_intronic	10.75	4	2	15	18.0175	5	0.00292451
No_LVEF,No_RVEF	rs61869036	5	10	121422836	3	rs61869036;rs72842211;rs2577339	C	G	0.218688	7.43964e-15	-0.0516142	0.00663696	BAG3	0	intronic	0.998	6	2	5	5.38942	5	0.370224
No_LS,No_RVEF	rs657171	6	18	34253625	2	rs657171;rs2848907	C	T	0.261431	8.57716e-09	0.0291597	0.00506535	FHOD3	0	intronic	5.852	5	4	15	2.35971	5	0.797458
