# Supplementary material for: Genomic structural equation modeling reveals shared genetic structure of cardiac function and structure-function association studies of CLCNKA mutations
Source: Research Square preprint supplement (doi:10.21203/rs.3.rs-7363435/v1), 2025-09-19
Supplement: Supplementary file 14 [file bf5b3a5c259795aadf6afe3f.xlsx]

## Sheet: Sheet1
Chromosome	Genetic contributions
chr7	-0.157
chr9	-0.111
chr16	-0.0988
chr1	-0.0751
chr2	-0.0382
chr10	-0.0366
chr17	-0.0299
chr14	-0.0111
chr11	-0.00467
chr6	0.00534
chr8	0.00728
chr4	0.0299
chr20	0.0405
chr15	0.0442
chr5	0.0479
chr12	0.0647
chr21	0.0707
chr19	0.0712
chr13	0.0784
chr18	0.0792
chr22	0.0805
chr3	0.317
