# Supplementary material for: Genomic structural equation modeling reveals shared genetic structure of cardiac function and structure-function association studies of CLCNKA mutations
Source: Research Square preprint supplement (doi:10.21203/rs.3.rs-7363435/v1), 2025-09-19
Supplement: Supplementary file 15 [file c3c33496351aa349e799a06c.xlsx]

## Sheet: Sheet1
block	ens_gene_id	ens_tx_id	mol_name	tissue	ref_name	type	chrom	tx_start	tx_stop	block_genes	trait	inference_pop1	inter_z_pop1	cv.R2_pop1	cv.R2.pval_pop1	ldregion_pop1	twas_z_pop1	pips_pop1	in_cred_set_pop1	eqtlfile
1:14891511-1:16897730	ENSG00000173641	NA	HSPB7	gtex_v8	scca1	protein_coding	1	16019593	16019594	92	trait	enet	NA	0.489434	2.32776e-46	1:14891976-1:16893336	6.43	1	1	sCCA1.db
8:125683719-8:126410917	ENSG00000170873	NA	MTSS1	gtex_v8	scca2	protein_coding	8	124728428	124728429	8	trait	lasso	NA	0.117025	5.08072e-10	8:125684215-8:126409894	-5.05	1	1	sCCA2.db
8:125683719-8:126410917	ENSG00000164983	NA	TMEM65	gtex_v8	scca1	protein_coding	8	124372691	124372692	8	trait	enet	NA	0.475196	1.52368e-44	8:125684215-8:126409894	-4.89	1	1	sCCA1.db
1:14891511-1:16897730	ENSG00000162458	NA	FBLIM1	gtex_v8	scca2	protein_coding	1	15756606	15756607	92	trait	enet	NA	0.0707405	1.46716e-06	1:14891976-1:16893336	-5.79	1	1	sCCA2.db
1:14891511-1:16897730	ENSG00000173641	NA	HSPB7	gtex_v8	scca3	protein_coding	1	16019593	16019594	92	trait	lasso	NA	0.268008	1.57386e-22	1:14891976-1:16893336	-6.51	0.999	1	sCCA3.db
2:178553183-2:181312739	ENSG00000180228	NA	PRKRA	gtex_v8	scca2	protein_coding	2	178451434	178451435	30	trait	lasso	NA	0.0300618	0.00138178	2:178553183-2:181312739	5.01	0.998	1	sCCA2.db
2:178553183-2:181312739	ENSG00000237298	NA	TTN-AS1	gtex_v8	scca1	lncRNA	2	178521182	178521183	30	trait	lasso	NA	0.0327133	0.000883045	2:178553183-2:181312739	-5.34	0.98	1	sCCA1.db
10:120591353-10:122407323	ENSG00000197771	NA	MCMBP	gtex_v8	scca2	protein_coding	10	119892555	119892556	25	trait	enet	NA	0.0303137	0.00132417	10:120591693-10:122407323	-4.54	0.964	1	sCCA2.db
10:120591353-10:122407323	ENSG00000151929	NA	BAG3	gtex_v8	scca3	protein_coding	10	119651369	119651370	25	trait	enet	NA	0.0212156	0.00622662	10:120591693-10:122407323	3.91	0.927	1	sCCA3.db
5:136376050-5:139265072	ENSG00000170482	NA	SLC23A1	gtex_v8	scca2	protein_coding	5	139384552	139384553	49	trait	enet	NA	0.0366073	0.000458264	5:136376050-5:139263987	5.38	0.897	1	sCCA2.db
2:178553183-2:181312739	ENSG00000079150	NA	FKBP7	gtex_v8	scca3	protein_coding	2	178478599	178478600	30	trait	enet	NA	0.479912	3.86178e-45	2:178553183-2:181312739	-3.78	0.872	1	sCCA3.db
5:136376050-5:139265072	ENSG00000170469	NA	SPATA24	gtex_v8	scca1	protein_coding	5	139404087	139404088	49	trait	enet	NA	0.334973	6.87968e-29	5:136376050-5:139263987	-5.84	0.808	1	sCCA1.db
18:33861964-18:35075250	ENSG00000134779	NA	TPGS2	gtex_v8	scca1	protein_coding	18	36829215	36829216	10	trait	enet	NA	0.666485	1.91889e-74	18:33862419-18:35075250	3.07	0.752	1	sCCA1.db
5:136376050-5:139265072	ENSG00000228672	NA	PROB1	gtex_v8	scca3	protein_coding	5	139395712	139395713	49	trait	enet	NA	0.110522	1.58545e-09	5:136376050-5:139263987	-5.66	0.615	1	sCCA3.db
8:125683719-8:126410917	ENSG00000156831	NA	NSMCE2	gtex_v8	scca3	protein_coding	8	125091840	125091841	8	trait	enet	NA	0.0186135	0.00974806	8:125684215-8:126409894	2.53	0.566	1	sCCA3.db
18:33861964-18:35075250	ENSG00000134779	NA	TPGS2	gtex_v8	scca3	protein_coding	18	36829215	36829216	10	trait	enet	NA	0.662692	1.06731e-73	18:33862419-18:35075250	-2.5	0.542	1	sCCA3.db
10:120591353-10:122407323	ENSG00000148908	NA	RGS10	gtex_v8	scca2	protein_coding	10	119542707	119542708	25	trait	enet	NA	0.067109	2.71135e-06	10:120591693-10:122407323	-4.02	0.531	1	sCCA2.db
