# Supplementary material for: Genomic structural equation modeling reveals shared genetic structure of cardiac function and structure-function association studies of CLCNKA mutations
Source: Research Square preprint supplement (doi:10.21203/rs.3.rs-7363435/v1), 2025-09-19
Supplement: Supplementary file 16 [file d434a6df2f225f9aed453398.xlsx]

## Sheet: Sheet1
Novel	GenomicLocus	rsID	CHR	BP	nearestGene	non_effect_allele	effect_allele	MAF	beta	se	p	SNP_LVEF	CHR_LVEF	BP_LVEF	effect_allele_LVEF	other_allele_LVEF	eaf_LVEF	beta_LVEF	se_LVEF	pval_LVEF	N_LVEF	CHR_LVSV	BP_LVSV	effect_allele_LVSV	other_allele_LVSV	beta_LVSV	se_LVSV	eaf_LVSV	pval_LVSV	SNP_LVSV	N_LVSV	SNP_LS	CHR_LS	BP_LS	effect_allele_LS	other_allele_LS	eaf_LS	beta_LS	se_LS	pval_LS	N_LS	CHR_RS	SNP_RS	BP_RS	effect_allele_RS	other_allele_RS	N_RS	eaf_RS	beta_RS
No_LVEF,No_RS	1	rs945425	1	16348412	CLCNKA	C	T	0.323062	0.037995	0.00576222	4.28679e-11	rs945425	1	16348412	T	C	0.325645	0.0746303	0.0114994	8.6e-11	16923	1	16348412	T	C	0.0587985	0.126869	0.324155	0.643036	rs945425	32528	rs945425	1	16348412	T	C	0.325607	0.0121238	0.00457245	0.008	23321	1	rs945425	16348412	T	C	26893	0.324893	0.0428083
No_LVEF	2	rs2042995	2	179558366	TTN-AS1:TTN	C	T	0.245527	-0.0438927	0.00689435	1.93433e-10	rs2042995	2	179558366	T	C	0.778704	-0.0913542	0.0130442	2.5e-12	16923	2	179558366	T	C	0.331724	0.141772	0.769965	0.019292	rs2042995	32528	rs2042995	2	179558366	T	C	0.776465	-0.00827943	0.00515714	0.087	23321	2	rs2042995	179558366	C	T	26893	0.223127	0.0214465
No_LVEF,No_RVEF	3	rs11950646	5	138714474	SLC23A1	A	G	0.378728	0.0310437	0.00545255	1.24508e-08	rs11950646	5	138714474	G	A	0.334776	0.064865	0.0114928	1.7e-08	16923	5	138714474	G	A	0.214207	0.12659	0.34037	0.0906212	rs11950646	32528	rs11950646	5	138714474	G	A	0.331249	0.0166874	0.00458069	0.0003	23321	5	rs11950646	138714474	G	A	26893	0.332017	0.00573265
No_LVEF	4	rs34866937	8	125859850	RP11-1082L8.3	A	G	0.337972	-0.0371413	0.00629349	3.60108e-09	rs34866937	8	125859850	G	A	0.686199	-0.0764623	0.0117181	6.8e-11	16923	8	125859850	G	A	0.0514114	0.12903	0.686638	0.690302	rs34866937	32528	rs34866937	8	125859850	G	A	0.685429	0.0046443	0.00466559	0.31	23321	8	rs34866937	125859850	A	G	26893	0.31307	0.0218802
No_LVEF,No_RVEF	5	rs61869036	10	121422836	BAG3	C	G	0.218688	-0.0516142	0.00663696	7.43964e-15	rs61869036	10	121422836	G	C	0.77821	-0.10165	0.0130621	7.1e-15	16923	10	121422836	G	C	0.057743	0.145653	0.784436	0.691779	rs61869036	32528	rs61869036	10	121422836	G	C	0.782386	-0.0269116	0.00524186	3e-07	23321	10	rs61869036	121422836	C	G	26893	0.218119	0.0159276
No_LS,No_RVEF	6	rs657171	18	34253625	FHOD3	C	T	0.261431	0.0291597	0.00506535	8.57716e-09	rs657171	18	34253625	T	C	0.280026	0.0504663	0.0121551	3.3e-05	16923	18	34253625	T	C	0.16951	0.133164	0.281367	0.203039	rs657171	32528	rs657171	18	34253625	T	C	0.281079	0.027971	0.00480296	3.5e-09	23321	18	rs657171	34253625	T	C	26893	0.278817	0.01726
[truncated: 22 more columns]
