# Supplementary material for: Genomic structural equation modeling reveals shared genetic structure of cardiac function and structure-function association studies of CLCNKA mutations
Source: Research Square preprint supplement (doi:10.21203/rs.3.rs-7363435/v1), 2025-09-19
Supplement: Supplementary file 17 [file e1191cc6452dd9f9c8910fca.xlsx]

## Sheet: Sheet1
NearestGene	SNP	CHR	POS	MAF	A1	A2	Effect	StdErr	P	N	tstat	leadSNP	SUSIE.CS	SUSIE.PP	FINEMAP.CS	FINEMAP.PP	FINEMAP.k	FINEMAP.PP_snp	Support	Consensus_SNP	mean.PP	mean.CS	FINEMAP.PP_config
CLCNKA	rs6696416	1	16368133	0.063618	A	G	0.0181071	0.00343173	1.31757e-07	1453231042	5.27638	TRUE	2	1	1	1	5	1	2	TRUE	1	1	1
CLCNKA	rs61136562	1	16379823	0.0487078	G	A	-0.000404925	0.00118446	0.732452	1453231042	-0.341866	FALSE	0	0	1	1	5	1	1	FALSE	0.75	0	1
CLCNKA	rs924204	1	16513926	0.424453	A	G	-0.00475326	0.00203051	0.0192365	1453231042	-2.34092	FALSE	0	0	1	1	5	1	1	FALSE	0.75	0	1
RP11-1082L8.3	rs13268726	8	126013134	0.084493	A	G	-0.000907986	0.00103363	0.379702	1453231042	-0.878446	FALSE	0	0	1	1	5	1	1	FALSE	0.75	0	1
RP11-1082L8.3	rs13277078	8	126050879	0.0765408	C	T	0.00937187	0.00349345	0.0073031	1453231042	2.6827	FALSE	0	0	1	1	5	1	1	FALSE	0.75	0	1
RP11-1082L8.3	rs7357374	8	126102788	0.082505	T	C	0.00124212	0.000889597	0.162632	1453231042	1.39627	FALSE	0	0	1	1	5	1	1	FALSE	0.75	0	1
RP11-1082L8.3	rs7357375	8	126102820	0.166998	T	C	0.000737354	0.000623479	0.23695	1453231042	1.18264	FALSE	0	0	1	1	5	1	1	FALSE	0.75	0	1
SLC23A1	rs34743558	5	138871324	0.197813	A	G	0.00160977	0.000728586	0.027144	1453231042	2.20944	FALSE	0	0	1	1	4	1	1	FALSE	0.75	0	1
SLC23A1	rs62385303	5	138764999	0.373757	C	T	0.000265868	0.000488606	0.586348	1453231042	0.544135	FALSE	0	0	1	1	4	1	1	FALSE	0.75	0	1
CLCNKA	rs6690317	1	16516585	0.416501	T	C	0.000154493	0.000466258	0.740383	1453231042	0.331346	FALSE	0	0	2	0.237276	5	1	1	FALSE	0.559319	0	1
CLCNKA	rs6700888	1	16558838	0.437376	C	A	0.00096109	0.000501043	0.0550887	1453231042	1.91818	FALSE	0	0	0	0		1	0	FALSE	0.5	0	1
RP11-1082L8.3	rs77046044	8	125908116	0.4334	C	T	-0.000290951	0.000467095	0.533353	1453231042	-0.622896	FALSE	0	0	0	0		1	0	FALSE	0.5	0	1
SLC23A1	rs116828278	5	138955868	0.0427435	A	G	0.000903876	0.00103785	0.383802	1453231042	0.870912	FALSE	0	0	0	0		1	0	FALSE	0.5	0	1
SLC23A1	rs60624741	5	138759293	0.0328032	A	G	-0.000536963	0.00133794	0.688174	1453231042	-0.401334	FALSE	0	0	0	0		1	0	FALSE	0.5	0	1
BAG3	rs56235009	10	121372181	0.203777	G	A	0.00566345	0.00247687	0.022223	1453231042	2.28653	FALSE	0	0	0	0.999999	2	0	0	FALSE	0.333333	0
CLCNKA	rs11588392	1	16375510	0.0487078	G	A	-0.000562118	0.00108498	0.604394	1453231042	-0.518092	FALSE	0	0	1	1	5	0	1	FALSE	0.25	0	0
CLCNKA	rs2050521	1	16368206	0.063618	A	G	-0.000412392	0.000948749	0.663803	1453231042	-0.434669	FALSE	1	1	0	0		0	1	FALSE	0.25	0	0
RP11-1082L8.3	rs10112171	8	126101936	0.0934394	C	G	0.00118619	0.000867991	0.171754	1453231042	1.36659	FALSE	0	0	1	1	5	0	1	FALSE	0.25	0	0
SLC23A1	rs10900864	5	138773090	0.350895	A	G	0.000508984	0.000507475	0.315873	1453231042	1.00297	FALSE	0	0	1	1	4	0	1	FALSE	0.25	0	0
SLC23A1	rs75351498	5	138757840	0.0328032	G	A	-0.000603009	0.0013433	0.653503	1453231042	-0.448902	FALSE	0	0	1	1	4	0	1	FALSE	0.25	0	0
BAG3	rs196276	10	121397276	0.210736	G	T	-0.000162462	0.000560803	0.772049	1453231042	-0.289695	FALSE	0	0	0	0.558068	2	0	0	FALSE	0.186023	0
CLCNKA	rs6656611	1	16515805	0.416501	T	C	0.000174696	0.000466226	0.707882	1453231042	0.374702	FALSE	0	0	1	0.650057	5	0	1	FALSE	0.162514	0	0
BAG3	rs196275	10	121396556	0.203777	A	T	8.1693e-05	0.000571703	0.886374	1453231042	0.142894	FALSE	0	0	0	0.275464	2	0	0	FALSE	0.0918213	0
BAG3	rs196273	10	121396078	0.203777	T	C	0.000107901	0.00057269	0.850555	1453231042	0.188411	FALSE	0	0	0	0.119101	2	0	0	FALSE	0.0397003	0
CLCNKA	rs6671165	1	16516110	0.417495	G	A	0.000161006	0.000466301	0.729881	1453231042	0.345284	FALSE	0	0	3	0.112667	5	0	1	FALSE	0.0281668	0	0
TTN-AS1_TTN	rs10930843	2	179796578	0.186879	G	C	0.0016861	0.000712226	0.0179153	1453231042	2.36736	TRUE	0	0	0	0.0160362	1	0	0	FALSE	0.0053454	0
TTN-AS1_TTN	rs10930841	2	179794958	0.185885	A	G	0.00163032	0.000705462	0.0208332	1453231042	2.31099	FALSE	0	0	0	0.0140552	1	0	0	FALSE	0.00468507	0
FHOD3	rs1513852	18	34071261	0.497018	T	C	0.00168503	0.000616876	0.00630368	1453231042	2.73155	TRUE	0	0	0	0.0140348	1	0	0	FALSE	0.00467827	0
TTN-AS1_TTN	rs10930840	2	179794833	0.185885	A	G	0.00162872	0.000705212	0.020913	1453231042	2.30955	FALSE	0	0	0	0.0140084	1	0	0	FALSE	0.00466947	0
FHOD3	rs1708706	18	34062130	0.489066	G	A	0.00168709	0.00061832	0.00636224	1453231042	2.7285	FALSE	0	0	0	0.0139185	1	0	0	FALSE	0.0046395	0
FHOD3	rs1398954	18	34010589	0.158052	G	A	0.00246815	0.000904821	0.00637624	1453231042	2.72778	FALSE	0	0	0	0.013891	1	0	0	FALSE	0.00463033	0
TTN-AS1_TTN	rs35288343	2	179797057	0.186879	T	C	0.00162371	0.000704459	0.0211716	1453231042	2.30491	FALSE	0	0	0	0.0138592	1	0	0	FALSE	0.00461973	0
TTN-AS1_TTN	rs13012900	2	179792303	0.186879	T	C	0.00162657	0.000706507	0.0213197	1453231042	2.30227	FALSE	0	0	0	0.0137753	1	0	0	FALSE	0.00459177	0
FHOD3	rs1790630	18	34061795	0.49006	A	G	0.00167077	0.000615151	0.00660697	1453231042	2.71603	FALSE	0	0	0	0.0134538	1	0	0	FALSE	0.0044846	0
FHOD3	rs9950563	18	34058015	0.317097	A	C	0.00181956	0.00067074	0.00667242	1453231042	2.71277	FALSE	0	0	0	0.0133351	1	0	0	FALSE	0.00444503	0
FHOD3	rs1708704	18	34055451	0.456262	G	A	0.00167207	0.000620551	0.00704946	1453231042	2.6945	FALSE	0	0	0	0.0126925	1	0	0	FALSE	0.00423083	0
TTN-AS1_TTN	rs34415271	2	179804382	0.184891	G	A	0.00158282	0.00069861	0.0234719	1453231042	2.26567	FALSE	0	0	0	0.0126703	1	0	0	FALSE	0.00422343	0
TTN-AS1_TTN	rs55883940	2	179807302	0.185885	A	G	0.00157737	0.00069778	0.0237867	1453231042	2.26056	FALSE	0	0	0	0.0125247	1	0	0	FALSE	0.0041749	0
FHOD3	rs1790641	18	34052138	0.454274	G	A	0.0016591	0.000619438	0.00739764	1453231042	2.67839	FALSE	0	0	0	0.0121551	1	0	0	FALSE	0.0040517	0
FHOD3	rs1708694	18	34067978	0.487078	T	C	0.00161024	0.00060251	0.0075278	1453231042	2.67255	FALSE	0	0	0	0.0119664	1	0	0	FALSE	0.0039888	0
FHOD3	rs12957801	18	34166741	0.337972	C	T	-0.00174182	0.000655097	0.00784029	1453231042	-2.65887	FALSE	0	0	0	0.011538	1	0	0	FALSE	0.003846	0
TTN-AS1_TTN	rs72961212	2	179783470	0.0596421	C	T	0.00244573	0.00110882	0.0274043	1453231042	2.20571	FALSE	0	0	0	0.0110809	1	0	0	FALSE	0.00369363	0
FHOD3	rs34287129	18	34182800	0.32008	A	G	-0.00178578	0.000675561	0.00820763	1453231042	-2.64341	FALSE	0	0	0	0.0110746	1	0	0	FALSE	0.00369153	0
FHOD3	rs12962575	18	34175905	0.315109	C	G	-0.00174174	0.000661666	0.00847955	1453231042	-2.63235	FALSE	0	0	0	0.0107563	1	0	0	FALSE	0.00358543	0
TTN-AS1_TTN	rs72650006	2	179569387	0.028827	T	A	-0.0143246	0.00654163	0.0285421	1453231042	-2.18975	FALSE	0	0	0	0.0106991	1	0	0	FALSE	0.00356637	0
FHOD3	rs9967144	18	34056098	0.305169	A	C	0.00172084	0.000661048	0.00923585	1453231042	2.6032	FALSE	0	0	0	0.00996592	1	0	0	FALSE	0.00332197	0
FHOD3	rs12966876	18	34168043	0.359841	A	G	-0.00166708	0.000641523	0.00935952	1453231042	-2.59864	FALSE	0	0	0	0.00984835	1	0	0	FALSE	0.00328278	0
FHOD3	rs12967509	18	34168428	0.359841	A	G	-0.00166512	0.000641211	0.00940877	1453231042	-2.59683	FALSE	0	0	0	0.00980235	1	0	0	FALSE	0.00326745	0
FHOD3	rs56389424	18	34167711	0.357853	G	A	-0.00166057	0.000640351	0.00950844	1453231042	-2.59321	FALSE	0	0	0	0.00971064	1	0	0	FALSE	0.00323688	0
FHOD3	rs953224	18	34169060	0.360835	A	G	-0.00164343	0.000636985	0.00987963	1453231042	-2.58001	FALSE	0	0	0	0.00938476	1	0	0	FALSE	0.00312825	0
FHOD3	rs12963116	18	34167147	0.337972	T	C	-0.00165235	0.000641486	0.0100003	1453231042	-2.57582	FALSE	0	0	0	0.00928381	1	0	0	FALSE	0.0030946	0
FHOD3	rs978035	18	34153940	0.423459	G	A	-0.0015893	0.000618566	0.0101894	1453231042	-2.56933	FALSE	0	0	0	0.00913021	1	0	0	FALSE	0.0030434	0
FHOD3	rs1513853	18	34071184	0.318091	A	G	0.00166209	0.000648583	0.0103875	1453231042	2.56265	FALSE	0	0	0	0.00897507	1	0	0	FALSE	0.00299169	0
FHOD3	rs12957358	18	34166489	0.338966	C	G	-0.00164724	0.000644543	0.0105986	1453231042	-2.55566	FALSE	0	0	0	0.00881589	1	0	0	FALSE	0.00293863	0
FHOD3	rs12606572	18	34171403	0.335984	C	T	-0.0016495	0.000645974	0.0106643	1453231042	-2.55351	FALSE	0	0	0	0.00876757	1	0	0	FALSE	0.00292252	0
TTN-AS1_TTN	rs962285	2	179670683	0.0337972	T	C	-0.0135162	0.00645575	0.0362898	1453231042	-2.09367	FALSE	0	0	0	0.00870905	1	0	0	FALSE	0.00290302	0
FHOD3	rs12606590	18	34171369	0.336978	G	A	-0.00164086	0.000643503	0.0107759	1453231042	-2.54988	FALSE	0	0	0	0.00868678	1	0	0	FALSE	0.00289559	0
FHOD3	rs12963930	18	34176619	0.315109	G	A	-0.00164191	0.000643934	0.010778	1453231042	-2.54981	FALSE	0	0	0	0.00868526	1	0	0	FALSE	0.00289509	0
FHOD3	rs713579	18	34182084	0.327038	T	C	-0.00163227	0.000643293	0.0111689	1453231042	-2.53737	FALSE	0	0	0	0.00841462	1	0	0	FALSE	0.00280487	0
TTN-AS1_TTN	rs11892354	2	179652513	0.0437376	T	C	0.00302802	0.0014616	0.0382911	1453231042	2.07172	FALSE	0	0	0	0.00832003	1	0	0	FALSE	0.00277334	0
FHOD3	rs978034	18	34153705	0.425447	T	G	-0.00155299	0.000613777	0.0113989	1453231042	-2.53023	FALSE	0	0	0	0.00826372	1	0	0	FALSE	0.00275457	0
TTN-AS1_TTN	rs34911297	2	179800216	0.244533	G	A	0.00127349	0.000616502	0.0388604	1453231042	2.06566	FALSE	0	0	0	0.00821634	1	0	0	FALSE	0.00273878	0
FHOD3	rs9652996	18	34172423	0.351889	T	C	-0.00159211	0.000630103	0.0115124	1453231042	-2.52675	FALSE	0	0	0	0.00819138	1	0	0	FALSE	0.00273046	0
FHOD3	rs12605734	18	34182266	0.327038	G	A	-0.00162245	0.000642385	0.0115479	1453231042	-2.52567	FALSE	0	0	0	0.008169	1	0	0	FALSE	0.002723	0
FHOD3	rs1790631	18	34059157	0.390656	T	A	0.00152598	0.000604227	0.0115532	1453231042	2.52551	FALSE	0	0	0	0.00816569	1	0	0	FALSE	0.0027219	0
FHOD3	rs11081952	18	34156981	0.324056	G	A	-0.00162763	0.000645338	0.0116643	1453231042	-2.52214	FALSE	0	0	0	0.00809662	1	0	0	FALSE	0.00269887	0
TTN-AS1_TTN	rs11897386	2	179652461	0.0437376	A	G	0.00301565	0.00146712	0.0398308	1453231042	2.0555	FALSE	0	0	0	0.00804606	1	0	0	FALSE	0.00268202	0
TTN-AS1_TTN	rs10497522	2	179652047	0.0427435	C	T	0.00304172	0.00148259	0.0402056	1453231042	2.05163	FALSE	0	0	0	0.00798238	1	0	0	FALSE	0.00266079	0
TTN-AS1_TTN	rs2089097	2	179802111	0.263419	G	A	0.00125564	0.000612767	0.0404499	1453231042	2.04912	FALSE	0	0	0	0.00794148	1	0	0	FALSE	0.00264716	0
FHOD3	rs9946694	18	34062513	0.32505	A	G	0.00162536	0.000646981	0.0119972	1453231042	2.51223	FALSE	0	0	0	0.00789708	1	0	0	FALSE	0.00263236	0
TTN-AS1_TTN	rs72648907	2	179612383	0.0516899	C	T	0.00240325	0.0011837	0.0423268	1453231042	2.03029	FALSE	0	0	0	0.00764222	1	0	0	FALSE	0.00254741	0
FHOD3	rs713578	18	34181900	0.307157	C	T	-0.00160366	0.000642339	0.0125393	1453231042	-2.49659	FALSE	0	0	0	0.00759382	1	0	0	FALSE	0.00253127	0
FHOD3	rs1513851	18	34071432	0.318091	A	G	0.00159304	0.000638265	0.0125642	1453231042	2.49589	FALSE	0	0	0	0.0075805	1	0	0	FALSE	0.00252683	0
TTN-AS1_TTN	rs12990416	2	179796028	0.263419	T	C	0.00124201	0.000613184	0.0428152	1453231042	2.02551	FALSE	0	0	0	0.00756842	1	0	0	FALSE	0.00252281	0
FHOD3	rs12971185	18	34174398	0.304175	C	T	-0.00159808	0.000640529	0.0125977	1453231042	-2.49494	FALSE	0	0	0	0.00756268	1	0	0	FALSE	0.00252089	0
TTN-AS1_TTN	rs1489479	2	179708677	0.45328	T	G	-0.00109503	0.00054108	0.0429929	1453231042	-2.02378	FALSE	0	0	0	0.00754197	1	0	0	FALSE	0.00251399	0
FHOD3	rs1790644	18	34046384	0.284294	A	C	0.00164696	0.000660559	0.012657	1453231042	2.49328	FALSE	0	0	0	0.00753128	1	0	0	FALSE	0.00251043	0
FHOD3	rs12958634	18	34175582	0.324056	G	A	-0.00157948	0.000634982	0.0128664	1453231042	-2.48745	FALSE	0	0	0	0.0074227	1	0	0	FALSE	0.00247423	0
FHOD3	rs1790640	18	34054773	0.489066	G	A	0.00147181	0.00059306	0.0130748	1453231042	2.48173	FALSE	0	0	0	0.00731798	1	0	0	FALSE	0.00243933	0
FHOD3	rs1513842	18	34066389	0.337972	G	A	0.00154846	0.000629944	0.013968	1453231042	2.45808	FALSE	0	0	0	0.0069029	1	0	0	FALSE	0.00230097	0
FHOD3	rs4799874	18	34179368	0.329026	C	A	0.00153575	0.000628896	0.0146071	1453231042	2.44198	FALSE	0	0	0	0.00663579	1	0	0	FALSE	0.00221193	0
FHOD3	rs3859360	18	34178190	0.305169	G	A	-0.00153078	0.000629132	0.0149679	1453231042	-2.43316	FALSE	0	0	0	0.00649462	1	0	0	FALSE	0.00216487	0
FHOD3	rs9965439	18	34168603	0.347913	C	G	-0.00151372	0.00062241	0.0150144	1453231042	-2.43203	FALSE	0	0	0	0.0064769	1	0	0	FALSE	0.00215897	0
FHOD3	rs997128	18	34060718	0.394632	C	A	0.00143317	0.000591043	0.0153161	1453231042	2.42482	FALSE	0	0	0	0.00636439	1	0	0	FALSE	0.00212146	0
FHOD3	rs3859359	18	34178122	0.305169	A	G	-0.0015196	0.000627442	0.0154399	1453231042	-2.42189	FALSE	0	0	0	0.00631947	1	0	0	FALSE	0.00210649	0
FHOD3	rs3859358	18	34178112	0.305169	G	C	-0.00152067	0.000629256	0.0156659	1453231042	-2.41661	FALSE	0	0	0	0.00623915	1	0	0	FALSE	0.00207972	0
TTN-AS1_TTN	rs4893852	2	179571448	0.0357853	A	G	0.00302333	0.0015711	0.0543125	1453231042	1.92434	FALSE	0	0	0	0.0061977	1	0	0	FALSE	0.0020659	0
FHOD3	rs112007315	18	34010470	0.107356	G	A	-0.00246224	0.00102077	0.0158592	1453231042	-2.41214	FALSE	0	0	0	0.00617223	1	0	0	FALSE	0.00205741	0
FHOD3	rs949241	18	34047194	0.281312	A	G	0.00156213	0.000648184	0.015952	1453231042	2.41001	FALSE	0	0	0	0.00614065	1	0	0	FALSE	0.00204688	0
FHOD3	rs3859357	18	34177909	0.306163	C	T	-0.00150706	0.000625897	0.0160472	1453231042	-2.40784	FALSE	0	0	0	0.0061086	1	0	0	FALSE	0.0020362	0
FHOD3	rs1708691	18	34067552	0.327038	T	C	0.00149299	0.000621638	0.0163192	1453231042	2.4017	FALSE	0	0	0	0.00601903	1	0	0	FALSE	0.00200634	0
FHOD3	rs1390431	18	34119428	0.49006	C	T	-0.00134048	0.000560074	0.0166935	1453231042	-2.39339	FALSE	0	0	0	0.00590032	1	0	0	FALSE	0.00196677	0
FHOD3	rs6507172	18	34064714	0.321074	A	G	0.00151516	0.000633576	0.0167822	1453231042	2.39144	FALSE	0	0	0	0.00587294	1	0	0	FALSE	0.00195765	0
FHOD3	rs12963694	18	34116553	0.469185	A	C	-0.00132831	0.000556153	0.0169223	1453231042	-2.38839	FALSE	0	0	0	0.00583023	1	0	0	FALSE	0.00194341	0
TTN-AS1_TTN	rs72648904	2	179613651	0.0238569	G	A	0.00288757	0.00152761	0.0587242	1453231042	1.89025	FALSE	0	0	0	0.00580762	1	0	0	FALSE	0.00193587	0
FHOD3	rs3947413	18	34127234	0.426441	C	T	-0.00137797	0.000577534	0.0170346	1453231042	-2.38596	FALSE	0	0	0	0.00579649	1	0	0	FALSE	0.00193216	0
TTN-AS1_TTN	rs2627042	2	179592724	0.0666004	A	G	0.00215652	0.00114338	0.0592834	1453231042	1.88609	FALSE	0	0	0	0.00576211	1	0	0	FALSE	0.0019207	0
FHOD3	rs12971018	18	34126650	0.426441	T	C	-0.00137284	0.000576898	0.0173274	1453231042	-2.37969	FALSE	0	0	0	0.00571049	1	0	0	FALSE	0.0019035	0
FHOD3	rs11665489	18	34126748	0.425447	G	A	-0.00137151	0.000576743	0.0174054	1453231042	-2.37803	FALSE	0	0	0	0.00568804	1	0	0	FALSE	0.00189601	0
FHOD3	rs11659739	18	34127192	0.425447	G	T	-0.00136799	0.000576199	0.0175885	1453231042	-2.37417	FALSE	0	0	0	0.00563608	1	0	0	FALSE	0.00187869	0
FHOD3	rs2901795	18	34006072	0.205765	T	A	0.00162476	0.000685531	0.0177844	1453231042	2.37008	FALSE	0	0	0	0.00558164	1	0	0	FALSE	0.00186055	0
FHOD3	rs9304159	18	34005996	0.204771	C	T	0.00161394	0.000683159	0.0181536	1453231042	2.36247	FALSE	0	0	0	0.00548207	1	0	0	FALSE	0.00182736	0
FHOD3	rs1790647	18	34003734	0.204771	C	T	0.00161301	0.000682885	0.0181744	1453231042	2.36205	FALSE	0	0	0	0.00547659	1	0	0	FALSE	0.00182553	0
TTN-AS1_TTN	rs151205795	2	179713983	0.0178926	C	A	0.00319526	0.00172073	0.0633221	1453231042	1.85692	FALSE	0	0	0	0.00545606	1	0	0	FALSE	0.00181869	0
TTN-AS1_TTN	rs7572955	2	179628337	0.033797	T	C	-0.00310396	0.00167209	0.063406	1453231042	-1.85633	FALSE	0	0	0	0.00545008	1	0	0	FALSE	0.00181669	0
FHOD3	rs1708690	18	34006421	0.204771	T	A	0.00161124	0.000682994	0.0183202	1453231042	2.35908	FALSE	0	0	0	0.00543841	1	0	0	FALSE	0.0018128	0
TTN-AS1_TTN	rs10221590	2	179643094	0.0347913	T	C	0.0030886	0.00167005	0.0643998	1453231042	1.8494	FALSE	0	0	0	0.00538054	1	0	0	FALSE	0.00179351	0
FHOD3	rs11081949	18	34003948	0.205765	T	C	0.00159299	0.000677253	0.0186661	1453231042	2.35213	FALSE	0	0	0	0.00535011	1	0	0	FALSE	0.00178337	0
FHOD3	rs2029847	18	34093867	0.427435	C	T	-0.00129545	0.000552316	0.0190025	1453231042	-2.34548	FALSE	0	0	0	0.00526719	1	0	0	FALSE	0.00175573	0
TTN-AS1_TTN	rs4894041	2	179628352	0.0347913	C	A	0.00305687	0.00166629	0.066575	1453231042	1.83453	FALSE	0	0	0	0.00523517	1	0	0	FALSE	0.00174506	0
TTN-AS1_TTN	rs4894040	2	179628231	0.0337972	T	C	0.00305416	0.00166596	0.0667615	1453231042	1.83328	FALSE	0	0	0	0.00522312	1	0	0	FALSE	0.00174104	0
TTN-AS1_TTN	rs145823247	2	179713988	0.0178926	C	A	0.00313359	0.00171003	0.0668793	1453231042	1.83248	FALSE	0	0	0	0.00521554	1	0	0	FALSE	0.00173851	0
FHOD3	rs8097164	18	34117315	0.469185	A	G	-0.00128969	0.000550868	0.019222	1453231042	-2.3412	FALSE	0	0	0	0.00521456	1	0	0	FALSE	0.00173819	0
TTN-AS1_TTN	rs10183237	2	179580210	0.0357853	G	A	0.00284576	0.00155667	0.0675337	1453231042	1.82811	FALSE	0	0	0	0.00517391	1	0	0	FALSE	0.00172464	0
TTN-AS1_TTN	rs16866519	2	179627176	0.0337972	G	C	0.00303617	0.00166294	0.0678836	1453231042	1.82578	FALSE	0	0	0	0.00515196	1	0	0	FALSE	0.00171732	0
TTN-AS1_TTN	rs1484120	2	179630256	0.0337972	A	T	0.00303406	0.00166331	0.0681361	1453231042	1.82411	FALSE	0	0	0	0.00513626	1	0	0	FALSE	0.00171209	0
TTN-AS1_TTN	rs4894045	2	179633644	0.0347913	G	C	0.00303949	0.0016665	0.0681703	1453231042	1.82388	FALSE	0	0	0	0.00513414	1	0	0	FALSE	0.00171138	0
TTN-AS1_TTN	rs13398235	2	179578704	0.0357853	G	A	0.00283478	0.00155561	0.0684101	1453231042	1.8223	FALSE	0	0	0	0.00511934	1	0	0	FALSE	0.00170645	0
TTN-AS1_TTN	rs10183361	2	179580525	0.0357853	C	T	0.00283194	0.00155567	0.0686978	1453231042	1.8204	FALSE	0	0	0	0.00510171	1	0	0	FALSE	0.00170057	0
TTN-AS1_TTN	rs72647888	2	179633187	0.0347913	T	C	0.0030316	0.00166627	0.068851	1453231042	1.8194	FALSE	0	0	0	0.00509238	1	0	0	FALSE	0.00169746	0
TTN-AS1_TTN	rs140462764	2	179642882	0.0347913	T	C	0.00302239	0.00166828	0.0700364	1453231042	1.81168	FALSE	0	0	0	0.00502149	1	0	0	FALSE	0.00167383	0
TTN-AS1_TTN	rs4893853	2	179632496	0.0347913	T	C	0.00301224	0.00166393	0.0702473	1453231042	1.81031	FALSE	0	0	0	0.00500912	1	0	0	FALSE	0.00166971	0
TTN-AS1_TTN	rs13017833	2	179636584	0.0427435	A	T	-0.0026	0.00143911	0.0708128	1453231042	-1.80668	FALSE	0	0	0	0.00497628	1	0	0	FALSE	0.00165876	0
TTN-AS1_TTN	rs11895382	2	179624325	0.0337972	T	C	0.00299614	0.00165972	0.0710418	1453231042	1.80521	FALSE	0	0	0	0.00496313	1	0	0	FALSE	0.00165438	0
TTN-AS1_TTN	rs16866473	2	179587546	0.0357853	A	G	0.00279164	0.00155276	0.0722003	1453231042	1.79785	FALSE	0	0	0	0.00489778	1	0	0	FALSE	0.00163259	0
FHOD3	rs60086559	18	34083574	0.318091	G	A	-0.00139696	0.000605589	0.0210671	1453231042	-2.30678	FALSE	0	0	0	0.00481371	1	0	0	FALSE	0.00160457	0
FHOD3	rs1790628	18	34072406	0.39662	C	A	0.00133196	0.000577782	0.02115	1453231042	2.3053	FALSE	0	0	0	0.00479726	1	0	0	FALSE	0.00159909	0
TTN-AS1_TTN	rs62178977	2	179582162	0.157058	C	T	-0.00127612	0.000717536	0.0753252	1453231042	-1.77848	FALSE	0	0	0	0.00473101	1	0	0	FALSE	0.001577	0
TTN-AS1_TTN	rs13390491	2	179582327	0.157058	C	T	-0.00127454	0.000717239	0.0755672	1453231042	-1.77701	FALSE	0	0	0	0.00471864	1	0	0	FALSE	0.00157288	0
TTN-AS1_TTN	rs4894048	2	179638721	0.0357853	C	T	0.00290259	0.00163363	0.0756059	1453231042	1.77677	FALSE	0	0	0	0.00471667	1	0	0	FALSE	0.00157222	0
TTN-AS1_TTN	rs62178978	2	179583398	0.16004	T	C	-0.00126768	0.000715753	0.0765416	1453231042	-1.77111	FALSE	0	0	0	0.00466957	1	0	0	FALSE	0.00155652	0
TTN-AS1_TTN	rs6750145	2	179582605	0.16004	A	G	-0.00126562	0.000715072	0.0767407	1453231042	-1.76992	FALSE	0	0	0	0.0046597	1	0	0	FALSE	0.00155323	0
FHOD3	rs4349224	18	34121474	0.499006	C	T	-0.0012661	0.000552555	0.0219427	1453231042	-2.29136	FALSE	0	0	0	0.00464603	1	0	0	FALSE	0.00154868	0
TTN-AS1_TTN	rs72959397	2	179772393	0.0874751	C	A	0.00157042	0.000888301	0.0770797	1453231042	1.76789	FALSE	0	0	0	0.00464298	1	0	0	FALSE	0.00154766	0
FHOD3	rs12458234	18	34113074	0.423459	C	T	-0.00124238	0.000542652	0.0220528	1453231042	-2.28946	FALSE	0	0	0	0.00462585	1	0	0	FALSE	0.00154195	0
FHOD3	rs1390429	18	34098100	0.423459	T	C	-0.00124334	0.000543089	0.0220566	1453231042	-2.28939	FALSE	0	0	0	0.00462514	1	0	0	FALSE	0.00154171	0
TTN-AS1_TTN	rs13421990	2	179654313	0.0347913	A	G	0.00290321	0.00165393	0.0792009	1453231042	1.75534	FALSE	0	0	0	0.00454149	1	0	0	FALSE	0.00151383	0
TTN-AS1_TTN	rs10194023	2	179793615	0.414513	C	A	0.000931749	0.000531454	0.0795665	1453231042	1.75321	FALSE	0	0	0	0.00452452	1	0	0	FALSE	0.00150817	0
TTN-AS1_TTN	rs17355623	2	179617425	0.0337972	A	G	0.00289339	0.00165226	0.0799169	1453231042	1.75117	FALSE	0	0	0	0.00450839	1	0	0	FALSE	0.0015028	0
FHOD3	rs4799866	18	34116743	0.426441	T	C	-0.00123092	0.00054077	0.0228323	1453231042	-2.27623	FALSE	0	0	0	0.00448825	1	0	0	FALSE	0.00149608	0
FHOD3	rs12458212	18	34113020	0.423459	A	G	-0.00122789	0.000540186	0.0230213	1453231042	-2.27308	FALSE	0	0	0	0.00445622	1	0	0	FALSE	0.00148541	0
FHOD3	rs12965062	18	34116604	0.425447	T	C	-0.00121872	0.000536925	0.0232195	1453231042	-2.2698	FALSE	0	0	0	0.00442316	1	0	0	FALSE	0.00147439	0
FHOD3	rs12961238	18	34112485	0.423459	A	C	-0.00122193	0.000539573	0.0235353	1453231042	-2.26463	FALSE	0	0	0	0.0043716	1	0	0	FALSE	0.0014572	0
FHOD3	rs12455828	18	34112978	0.423459	T	C	-0.0012232	0.000540484	0.0236256	1453231042	-2.26316	FALSE	0	0	0	0.00435709	1	0	0	FALSE	0.00145236	0
FHOD3	rs12966492	18	34152067	0.445328	C	T	-0.00122981	0.000543536	0.0236601	1453231042	-2.2626	FALSE	0	0	0	0.00435159	1	0	0	FALSE	0.00145053	0
FHOD3	rs4799867	18	34116874	0.427435	G	A	-0.00121321	0.000536566	0.0237551	1453231042	-2.26107	FALSE	0	0	0	0.00433649	1	0	0	FALSE	0.0014455	0
TTN-AS1_TTN	rs13420249	2	179665823	0.0477137	C	T	-0.00196816	0.0011392	0.0840482	1453231042	-1.72767	FALSE	0	0	0	0.00432779	1	0	0	FALSE	0.0014426	0
FHOD3	rs12967616	18	34120761	0.445328	T	C	-0.00122006	0.000540023	0.0238659	1453231042	-2.25928	FALSE	0	0	0	0.00431901	1	0	0	FALSE	0.00143967	0
FHOD3	rs8096123	18	34094174	0.427435	T	G	-0.00124536	0.000551435	0.0239209	1453231042	-2.2584	FALSE	0	0	0	0.0043104	1	0	0	FALSE	0.0014368	0
FHOD3	rs72895517	18	34177931	0.187873	T	C	-0.00177686	0.000787184	0.0239934	1453231042	-2.25723	FALSE	0	0	0	0.0042991	1	0	0	FALSE	0.00143303	0
FHOD3	rs938270	18	34069595	0.402584	C	A	0.00127483	0.000564965	0.0240415	1453231042	2.25647	FALSE	0	0	0	0.00429165	1	0	0	FALSE	0.00143055	0
TTN-AS1_TTN	rs16866538	2	179659912	0.0477137	G	A	-0.0019608	0.00114005	0.085447	1453231042	-1.71992	FALSE	0	0	0	0.0042704	1	0	0	FALSE	0.00142347	0
TTN-AS1_TTN	rs12997957	2	179576401	0.156064	C	T	-0.00121756	0.000712203	0.0873451	1453231042	-1.70957	FALSE	0	0	0	0.00419529	1	0	0	FALSE	0.00139843	0
FHOD3	rs12456798	18	34111215	0.418489	A	G	-0.00120631	0.000538251	0.025015	1453231042	-2.24117	FALSE	0	0	0	0.00414654	1	0	0	FALSE	0.00138218	0
FHOD3	rs12957090	18	34127020	0.464215	T	C	-0.00123365	0.000550844	0.0251192	1453231042	-2.23956	FALSE	0	0	0	0.00413164	1	0	0	FALSE	0.00137721	0
TTN-AS1_TTN	rs10176708	2	179578478	0.0357853	C	A	0.00262242	0.00154364	0.0893475	1453231042	1.69885	FALSE	0	0	0	0.00411933	1	0	0	FALSE	0.00137311	0
TTN-AS1_TTN	rs13004438	2	179713668	0.40159	T	C	-0.000890168	0.00052492	0.0899207	1453231042	-1.69582	FALSE	0	0	0	0.00409817	1	0	0	FALSE	0.00136606	0
FHOD3	rs1708698	18	34026627	0.307157	T	G	0.00137889	0.000617654	0.0255849	1453231042	2.23245	FALSE	0	0	0	0.00406648	1	0	0	FALSE	0.00135549	0
FHOD3	rs8097433	18	34110763	0.418489	T	C	-0.00119974	0.000537447	0.0255955	1453231042	-2.23229	FALSE	0	0	0	0.00406503	1	0	0	FALSE	0.00135501	0
FHOD3	rs1708699	18	34035513	0.335984	T	C	0.00129085	0.00057843	0.0256388	1453231042	2.23164	FALSE	0	0	0	0.00405909	1	0	0	FALSE	0.00135303	0
TTN-AS1_TTN	rs2129111	2	179707898	0.475149	A	G	-0.000867364	0.000514787	0.0920083	1453231042	-1.6849	FALSE	0	0	0	0.00402323	1	0	0	FALSE	0.00134108	0
TTN-AS1_TTN	rs1873163	2	179753695	0.0586481	C	T	-0.00713046	0.0042461	0.0930941	1453231042	-1.6793	FALSE	0	0	0	0.00398551	1	0	0	FALSE	0.0013285	0
FHOD3	rs16967980	18	34153170	0.248509	G	A	0.00138973	0.000625659	0.026336	1453231042	2.22122	FALSE	0	0	0	0.00396602	1	0	0	FALSE	0.00132201	0
TTN-AS1_TTN	rs10497519	2	179610163	0.0337972	A	T	0.00273956	0.00163555	0.0939323	1453231042	1.67501	FALSE	0	0	0	0.00395695	1	0	0	FALSE	0.00131898	0
TTN-AS1_TTN	rs10203085	2	179571697	0.0357853	C	T	0.00257518	0.00153923	0.0943214	1453231042	1.67303	FALSE	0	0	0	0.00394386	1	0	0	FALSE	0.00131462	0
FHOD3	rs17651215	18	34114249	0.417495	T	C	-0.00118418	0.000534435	0.0267079	1453231042	-2.21576	FALSE	0	0	0	0.00391826	1	0	0	FALSE	0.00130609	0
TTN-AS1_TTN	rs111692972	2	179669931	0.0497018	C	T	-0.00182982	0.00109707	0.0953323	1453231042	-1.66792	FALSE	0	0	0	0.00391031	1	0	0	FALSE	0.00130344	0
FHOD3	rs12968765	18	34125914	0.465209	A	G	-0.00120839	0.000545806	0.0268321	1453231042	-2.21395	FALSE	0	0	0	0.00390259	1	0	0	FALSE	0.00130086	0
FHOD3	rs12958886	18	34123980	0.467197	G	A	-0.00120607	0.00054547	0.0270318	1453231042	-2.21106	FALSE	0	0	0	0.0038777	1	0	0	FALSE	0.00129257	0
TTN-AS1_TTN	rs6755035	2	179753954	0.0586481	A	T	-0.00706051	0.00424775	0.0964768	1453231042	-1.66218	FALSE	0	0	0	0.00387314	1	0	0	FALSE	0.00129105	0
FHOD3	rs12456512	18	34086110	0.403579	T	C	-0.00123142	0.000557253	0.0271186	1453231042	-2.20981	FALSE	0	0	0	0.00386698	1	0	0	FALSE	0.00128899	0
TTN-AS1_TTN	rs4894069	2	179798265	0.336978	C	G	0.000917889	0.000552636	0.0967276	1453231042	1.66093	FALSE	0	0	0	0.0038651	1	0	0	FALSE	0.00128837	0
TTN-AS1_TTN	rs10204089	2	179793489	0.335984	T	C	0.000920254	0.000555867	0.0978175	1453231042	1.65553	FALSE	0	0	0	0.00383063	1	0	0	FALSE	0.00127688	0
TTN-AS1_TTN	rs35596070	2	179759692	0.129225	C	A	0.00122483	0.000740783	0.0982451	1453231042	1.65342	FALSE	0	0	0	0.00381731	1	0	0	FALSE	0.00127244	0
FHOD3	rs12963484	18	34116301	0.451292	C	T	-0.00119582	0.000543997	0.0279338	1453231042	-2.19821	FALSE	0	0	0	0.00376943	1	0	0	FALSE	0.00125648	0
FHOD3	rs12964847	18	34125612	0.465209	C	T	-0.00119528	0.000544012	0.028009	1453231042	-2.19716	FALSE	0	0	0	0.00376071	1	0	0	FALSE	0.00125357	0
FHOD3	rs1874382	18	34122682	0.468191	T	C	-0.00118435	0.000539054	0.0280134	1453231042	-2.1971	FALSE	0	0	0	0.0037602	1	0	0	FALSE	0.0012534	0
FHOD3	rs11660599	18	34120972	0.457256	A	G	-0.00117839	0.000536579	0.0280835	1453231042	-2.19612	FALSE	0	0	0	0.00375211	1	0	0	FALSE	0.0012507	0
TTN-AS1_TTN	rs10930844	2	179797571	0.335984	C	T	0.000904173	0.000551293	0.100985	1453231042	1.6401	FALSE	0	0	0	0.00373445	1	0	0	FALSE	0.00124482	0
TTN-AS1_TTN	rs12622914	2	179580093	0.156064	A	C	-0.00114832	0.000704415	0.103064	1453231042	-1.63018	FALSE	0	0	0	0.00367439	1	0	0	FALSE	0.0012248	0
FHOD3	rs12964583	18	34125569	0.466203	A	C	-0.00119416	0.000546323	0.0288299	1453231042	-2.1858	FALSE	0	0	0	0.00366828	1	0	0	FALSE	0.00122276	0
FHOD3	rs12458219	18	34113096	0.423459	A	G	-0.00115898	0.000531433	0.0291938	1453231042	-2.18086	FALSE	0	0	0	0.00362889	1	0	0	FALSE	0.00120963	0
FHOD3	rs867481	18	34101954	0.426441	T	C	-0.00115116	0.000528042	0.0292532	1453231042	-2.18006	FALSE	0	0	0	0.00362254	1	0	0	FALSE	0.00120751	0
TTN-AS1_TTN	rs6752606	2	179801042	0.333002	G	A	0.000888913	0.000549892	0.105981	1453231042	1.61652	FALSE	0	0	0	0.00359384	1	0	0	FALSE	0.00119795	0
FHOD3	rs950777	18	34120008	0.460239	T	C	-0.00115456	0.000533149	0.0303457	1453231042	-2.16555	FALSE	0	0	0	0.00351013	1	0	0	FALSE	0.00117004	0
FHOD3	rs12604401	18	34123742	0.467197	T	C	-0.00116268	0.000538902	0.0309671	1453231042	-2.1575	FALSE	0	0	0	0.00344955	1	0	0	FALSE	0.00114985	0
TTN-AS1_TTN	rs6433737	2	179706204	0.379722	A	T	0.000822046	0.000521397	0.114882	1453231042	1.57662	FALSE	0	0	0	0.00337203	1	0	0	FALSE	0.00112401	0
TTN-AS1_TTN	rs78395897	2	179750795	0.0377734	G	T	0.00267836	0.00169926	0.114982	1453231042	1.57619	FALSE	0	0	0	0.00336972	1	0	0	FALSE	0.00112324	0
TTN-AS1_TTN	rs7564407	2	179800395	0.328032	G	T	-0.000866898	0.000551659	0.116081	1453231042	-1.57144	FALSE	0	0	0	0.00334462	1	0	0	FALSE	0.00111487	0
TTN-AS1_TTN	rs2129110	2	179591055	0.148111	A	C	-0.0011243	0.000719409	0.118096	1453231042	-1.56282	FALSE	0	0	0	0.00329973	1	0	0	FALSE	0.00109991	0
TTN-AS1_TTN	rs75008722	2	179807896	0.328032	C	T	-0.000858109	0.000551053	0.119419	1453231042	-1.55722	FALSE	0	0	0	0.00327104	1	0	0	FALSE	0.00109035	0
TTN-AS1_TTN	rs1016800	2	179749501	0.0337972	A	G	0.00265909	0.00171038	0.120024	1453231042	1.55467	FALSE	0	0	0	0.00325812	1	0	0	FALSE	0.00108604	0
TTN-AS1_TTN	rs72648998	2	179575511	0.054672	C	T	-0.0018234	0.00117296	0.120056	1453231042	-1.55454	FALSE	0	0	0	0.00325743	1	0	0	FALSE	0.00108581	0
TTN-AS1_TTN	rs1489482	2	179688532	0.0745527	C	A	-0.00619339	0.00399727	0.121284	1453231042	-1.54941	FALSE	0	0	0	0.00323158	1	0	0	FALSE	0.00107719	0
TTN-AS1_TTN	rs13418449	2	179741118	0.0328032	C	A	0.00263126	0.00170108	0.121906	1453231042	1.54682	FALSE	0	0	0	0.00321868	1	0	0	FALSE	0.00107289	0
TTN-AS1_TTN	rs72959368	2	179743990	0.0238569	G	A	-0.00293816	0.00189966	0.121941	1453231042	-1.54668	FALSE	0	0	0	0.00321796	1	0	0	FALSE	0.00107265	0
TTN-AS1_TTN	rs2742345	2	179568682	0.0675944	C	T	0.00166748	0.00107812	0.121945	1453231042	1.54666	FALSE	0	0	0	0.00321788	1	0	0	FALSE	0.00107263	0
TTN-AS1_TTN	rs73041922	2	179746822	0.0328032	G	A	0.00261027	0.001693	0.123121	1453231042	1.5418	FALSE	0	0	0	0.00319384	1	0	0	FALSE	0.00106461	0
TTN-AS1_TTN	rs13426103	2	179743484	0.0328032	C	A	0.00261218	0.00170136	0.124698	1453231042	1.53535	FALSE	0	0	0	0.00316228	1	0	0	FALSE	0.00105409	0
TTN-AS1_TTN	rs10171295	2	179747447	0.0328032	C	T	0.00258725	0.00169055	0.125913	1453231042	1.53042	FALSE	0	0	0	0.00313847	1	0	0	FALSE	0.00104616	0
TTN-AS1_TTN	rs76879420	2	179744791	0.0328032	C	T	0.00260243	0.00170291	0.126456	1453231042	1.52823	FALSE	0	0	0	0.00312797	1	0	0	FALSE	0.00104266	0
TTN-AS1_TTN	rs34940894	2	179755937	0.121272	A	G	0.00112453	0.000737725	0.12743	1453231042	1.52432	FALSE	0	0	0	0.00310935	1	0	0	FALSE	0.00103645	0
TTN-AS1_TTN	rs13388262	2	179743094	0.0328032	T	C	0.00258849	0.00169871	0.127559	1453231042	1.5238	FALSE	0	0	0	0.00310689	1	0	0	FALSE	0.00103563	0
TTN-AS1_TTN	rs10171735	2	179734773	0.0328032	A	G	0.00260126	0.00170727	0.127599	1453231042	1.52364	FALSE	0	0	0	0.00310614	1	0	0	FALSE	0.00103538	0
FHOD3	rs72893891	18	34154236	0.136183	A	T	-0.00187909	0.000891498	0.0350495	1453231042	-2.10779	FALSE	0	0	0	0.00310258	1	0	0	FALSE	0.00103419	0
TTN-AS1_TTN	rs6755456	2	179562140	0.16998	T	C	-0.00103063	0.000683483	0.131579	1453231042	-1.5079	FALSE	0	0	0	0.00303294	1	0	0	FALSE	0.00101098	0
FHOD3	rs72891764	18	34038204	0.0437376	G	A	-0.00269807	0.00128782	0.0361654	1453231042	-2.09506	FALSE	0	0	0	0.00302072	1	0	0	FALSE	0.00100691	0
TTN-AS1_TTN	rs57183380	2	179739104	0.0337972	A	G	0.00253506	0.00168775	0.133088	1453231042	1.50203	FALSE	0	0	0	0.00300626	1	0	0	FALSE	0.00100209	0
TTN-AS1_TTN	rs80196587	2	179716710	0.0805169	C	A	0.00530839	0.00353663	0.133362	1453231042	1.50097	FALSE	0	0	0	0.00300148	1	0	0	FALSE	0.00100049	0
TTN-AS1_TTN	rs2366911	2	179693672	0.481113	T	C	-0.000740998	0.000495051	0.134443	1453231042	-1.49681	FALSE	0	0	0	0.0029828	1	0	0	FALSE	0.000994267	0
TTN-AS1_TTN	rs6717759	2	179706607	0.280318	G	A	0.00082332	0.000551231	0.13528	1453231042	1.4936	FALSE	0	0	0	0.00296853	1	0	0	FALSE	0.00098951	0
FHOD3	rs1554009	18	34046177	0.343936	G	A	0.00116389	0.000559279	0.0374292	1453231042	2.08105	FALSE	0	0	0	0.00293362	1	0	0	FALSE	0.000977873	0
FHOD3	rs9958510	18	34136132	0.315109	C	G	-0.00122168	0.000589435	0.0382064	1453231042	-2.07263	FALSE	0	0	0	0.00288278	1	0	0	FALSE	0.000960927	0
TTN-AS1_TTN	rs13419085	2	179702437	0.0407555	T	C	0.00860339	0.00587257	0.142917	1453231042	1.46501	FALSE	0	0	0	0.00284561	1	0	0	FALSE	0.000948537	0
FHOD3	rs72891761	18	34037867	0.0447316	A	G	-0.00262407	0.00127373	0.0393838	1453231042	-2.06015	FALSE	0	0	0	0.00280939	1	0	0	FALSE	0.000936463	0
TTN-AS1_TTN	rs6715901	2	179650954	0.488072	G	A	-0.000727727	0.000502423	0.147496	1453231042	-1.44843	FALSE	0	0	0	0.0027777	1	0	0	FALSE	0.0009259	0
TTN-AS1_TTN	rs2046777	2	179685937	0.0745527	T	C	-0.0057735	0.00399749	0.14866	1453231042	-1.44428	FALSE	0	0	0	0.00276106	1	0	0	FALSE	0.000920353	0
TTN-AS1_TTN	rs34883828	2	179770175	0.121272	C	A	0.00105045	0.000730883	0.150651	1453231042	1.43724	FALSE	0	0	0	0.00273319	1	0	0	FALSE	0.000911063	0
TTN-AS1_TTN	rs2366912	2	179693712	0.309145	G	T	-0.000788376	0.00054914	0.1511	1453231042	-1.43566	FALSE	0	0	0	0.00272699	1	0	0	FALSE	0.000908997	0
TTN-AS1_TTN	rs55968359	2	179711949	0.27833	G	C	0.00077974	0.000546306	0.153495	1453231042	1.4273	FALSE	0	0	0	0.00269455	1	0	0	FALSE	0.000898183	0
TTN-AS1_TTN	rs7590740	2	179675319	0.055666	A	G	-0.00640685	0.00449461	0.154027	1453231042	-1.42545	FALSE	0	0	0	0.00268746	1	0	0	FALSE	0.00089582	0
FHOD3	rs11659804	18	34127383	0.331014	G	T	-0.00118519	0.000582207	0.0417826	1453231042	-2.03568	FALSE	0	0	0	0.00267205	1	0	0	FALSE	0.000890683	0
TTN-AS1_TTN	rs7592323	2	179693338	0.309145	G	A	-0.000778033	0.00054788	0.155585	1453231042	-1.42008	FALSE	0	0	0	0.00266701	1	0	0	FALSE	0.000889003	0
TTN-AS1_TTN	rs7591759	2	179692967	0.455268	C	T	-0.000695659	0.000492857	0.158102	1453231042	-1.41148	FALSE	0	0	0	0.00263475	1	0	0	FALSE	0.00087825	0
TTN-AS1_TTN	rs10497523	2	179652802	0.437376	A	G	-0.000690963	0.000491171	0.159497	1453231042	-1.40677	FALSE	0	0	0	0.00261729	1	0	0	FALSE	0.00087243	0
TTN-AS1_TTN	rs11886281	2	179681681	0.0536779	G	A	-0.00629683	0.00451692	0.163301	1453231042	-1.39405	FALSE	0	0	0	0.00257111	1	0	0	FALSE	0.000857037	0
TTN-AS1_TTN	rs66733621	2	179664050	0.276342	A	G	-0.000745748	0.0005373	0.16515	1453231042	-1.38796	FALSE	0	0	0	0.00254939	1	0	0	FALSE	0.000849797	0
TTN-AS1_TTN	rs56005624	2	179774634	0.122266	T	G	0.00100099	0.000724917	0.16733	1453231042	1.38083	FALSE	0	0	0	0.00252438	1	0	0	FALSE	0.00084146	0
TTN-AS1_TTN	rs4894056	2	179728848	0.0328032	C	T	0.00226848	0.00165091	0.169418	1453231042	1.37408	FALSE	0	0	0	0.00250099	1	0	0	FALSE	0.000833663	0
FHOD3	rs9951261	18	34146384	0.312127	G	T	-0.00116234	0.000580356	0.0451987	1453231042	-2.0028	FALSE	0	0	0	0.00250041	1	0	0	FALSE	0.00083347	0
FHOD3	rs9947459	18	34135967	0.34493	T	G	-0.001148	0.000573672	0.0453776	1453231042	-2.00114	FALSE	0	0	0	0.0024921	1	0	0	FALSE	0.0008307	0
TTN-AS1_TTN	rs72957359	2	179696164	0.180915	A	T	0.000906948	0.000663013	0.171337	1453231042	1.36792	FALSE	0	0	0	0.00247997	1	0	0	FALSE	0.000826657	0
FHOD3	rs62082356	18	34121419	0.33499	C	G	-0.00114507	0.000572907	0.0456413	1453231042	-1.9987	FALSE	0	0	0	0.00247996	1	0	0	FALSE	0.000826653	0
TTN-AS1_TTN	rs13417645	2	179561528	0.0328032	T	C	0.00212966	0.00155925	0.171994	1453231042	1.36582	FALSE	0	0	0	0.00247287	1	0	0	FALSE	0.00082429	0
TTN-AS1_TTN	rs3816849	2	179667090	0.43837	C	T	-0.000665127	0.000493601	0.177819	1453231042	-1.3475	FALSE	0	0	0	0.00241216	1	0	0	FALSE	0.000804053	0
FHOD3	rs938272	18	34074629	0.387674	T	C	0.00109961	0.000554575	0.0473902	1453231042	1.9828	FALSE	0	0	0	0.0024027	1	0	0	FALSE	0.0008009	0
TTN-AS1_TTN	rs74845404	2	179755302	0.0228628	T	C	0.0021509	0.00160021	0.178904	1453231042	1.34414	FALSE	0	0	0	0.00240126	1	0	0	FALSE	0.00080042	0
TTN-AS1_TTN	rs10190741	2	179687872	0.471173	C	T	-0.000654432	0.000487215	0.179204	1453231042	-1.34321	FALSE	0	0	0	0.00239828	1	0	0	FALSE	0.000799427	0
TTN-AS1_TTN	rs2046778	2	179672547	0.229622	T	C	0.000753269	0.000569431	0.185887	1453231042	1.32284	FALSE	0	0	0	0.00233404	1	0	0	FALSE	0.000778013	0
TTN-AS1_TTN	rs12464215	2	179690968	0.471173	G	T	-0.000643211	0.000486484	0.186114	1453231042	-1.32216	FALSE	0	0	0	0.00233194	1	0	0	FALSE	0.000777313	0
TTN-AS1_TTN	rs73040346	2	179691793	0.0457256	T	C	-0.00152651	0.00115573	0.186562	1453231042	-1.32082	FALSE	0	0	0	0.0023278	1	0	0	FALSE	0.000775933	0
TTN-AS1_TTN	rs2562834	2	179580583	0.187873	T	C	-0.000845263	0.000641593	0.18769	1453231042	-1.31744	FALSE	0	0	0	0.00231747	1	0	0	FALSE	0.00077249	0
TTN-AS1_TTN	rs6709734	2	179729141	0.375746	C	T	-0.000675074	0.000512643	0.187889	1453231042	-1.31685	FALSE	0	0	0	0.00231565	1	0	0	FALSE	0.000771883	0
TTN-AS1_TTN	rs6709708	2	179729081	0.375746	C	T	-0.000670591	0.000511775	0.190087	1453231042	-1.31032	FALSE	0	0	0	0.00229588	1	0	0	FALSE	0.000765293	0
TTN-AS1_TTN	rs10187266	2	179727387	0.0328032	G	T	0.0021421	0.00164049	0.191631	1453231042	1.30577	FALSE	0	0	0	0.00228225	1	0	0	FALSE	0.00076075	0
FHOD3	rs17651163	18	34109848	0.472167	G	A	-0.00100938	0.000517429	0.0510857	1453231042	-1.95076	FALSE	0	0	0	0.00225598	1	0	0	FALSE	0.000751993	0
FHOD3	rs3859353	18	34094852	0.477137	T	C	-0.00101277	0.000519352	0.0511678	1453231042	-1.95007	FALSE	0	0	0	0.00225294	1	0	0	FALSE	0.00075098	0
TTN-AS1_TTN	rs17453312	2	179695728	0.259443	T	C	0.000700645	0.000541407	0.195625	1453231042	1.29412	FALSE	0	0	0	0.00224794	1	0	0	FALSE	0.000749313	0
FHOD3	rs55995665	18	34115982	0.349901	G	A	-0.00108262	0.000555698	0.0513894	1453231042	-1.94821	FALSE	0	0	0	0.00224481	1	0	0	FALSE	0.00074827	0
FHOD3	rs60677127	18	34089970	0.418489	C	T	-0.00102352	0.000526369	0.0518374	1453231042	-1.94448	FALSE	0	0	0	0.00222856	1	0	0	FALSE	0.000742853	0
FHOD3	rs11875893	18	34157600	0.297217	T	C	-0.00114086	0.000586722	0.0518392	1453231042	-1.94447	FALSE	0	0	0	0.0022285	1	0	0	FALSE	0.000742833	0
FHOD3	rs8097811	18	34098590	0.474155	A	G	-0.00100206	0.000516037	0.0521563	1453231042	-1.94184	FALSE	0	0	0	0.00221716	1	0	0	FALSE	0.000739053	0
TTN-AS1_TTN	rs2255167	2	179558282	0.204771	T	A	-0.000789436	0.000619182	0.202321	1453231042	-1.27497	FALSE	0	0	0	0.00219331	1	0	0	FALSE	0.000731103	0
FHOD3	rs4799423	18	34099149	0.472167	C	T	-0.000999086	0.000516331	0.0529937	1453231042	-1.93497	FALSE	0	0	0	0.00218783	1	0	0	FALSE	0.000729277	0
FHOD3	rs17565981	18	34098306	0.474155	A	G	-0.000992168	0.00051507	0.0540695	1453231042	-1.92628	FALSE	0	0	0	0.00215142	1	0	0	FALSE	0.00071714	0
FHOD3	rs9959037	18	34157633	0.297217	T	C	0.00112707	0.00058532	0.0541595	1453231042	1.92556	FALSE	0	0	0	0.00214844	1	0	0	FALSE	0.000716147	0
TTN-AS1_TTN	rs1027138	2	179723019	0.379722	C	T	-0.000635756	0.00050926	0.211888	1453231042	-1.24839	FALSE	0	0	0	0.002121	1	0	0	FALSE	0.000707	0
FHOD3	rs4799422	18	34098972	0.473161	A	G	-0.000987462	0.000514617	0.055006	1453231042	-1.91883	FALSE	0	0	0	0.00212082	1	0	0	FALSE	0.00070694	0
TTN-AS1_TTN	rs1872203	2	179719966	0.33002	A	T	0.000654964	0.000526265	0.213297	1453231042	1.24455	FALSE	0	0	0	0.00211087	1	0	0	FALSE	0.000703623	0
TTN-AS1_TTN	rs17076	2	179595117	0.188867	C	G	-0.000781973	0.000634781	0.217994	1453231042	-1.23188	FALSE	0	0	0	0.002078	1	0	0	FALSE	0.000692667	0
FHOD3	rs12457657	18	34112836	0.477137	A	G	-0.000977127	0.000512398	0.0565248	1453231042	-1.90697	FALSE	0	0	0	0.00207324	1	0	0	FALSE	0.00069108	0
FHOD3	rs11661779	18	34167964	0.300199	T	A	-0.00110059	0.000579542	0.0575547	1453231042	-1.89907	FALSE	0	0	0	0.00204233	1	0	0	FALSE	0.000680777	0
TTN-AS1_TTN	rs2279472	2	179672414	0.0457256	C	T	-0.0013612	0.00111972	0.224114	1453231042	-1.21566	FALSE	0	0	0	0.00203717	1	0	0	FALSE	0.000679057	0
TTN-AS1_TTN	rs80271311	2	179734144	0.0725646	C	T	-0.00128673	0.00105929	0.224479	1453231042	-1.2147	FALSE	0	0	0	0.0020348	1	0	0	FALSE	0.000678267	0
FHOD3	rs72893841	18	34115469	0.0407555	C	T	-0.00257194	0.00135601	0.0578669	1453231042	-1.8967	FALSE	0	0	0	0.00203317	1	0	0	FALSE	0.000677723	0
TTN-AS1_TTN	rs3769858	2	179667806	0.413519	C	T	-0.000591369	0.000493187	0.230498	1453231042	-1.19908	FALSE	0	0	0	0.00199678	1	0	0	FALSE	0.000665593	0
FHOD3	rs7240953	18	34167941	0.300199	G	A	0.00109035	0.000578412	0.0594193	1453231042	1.88508	FALSE	0	0	0	0.00198896	1	0	0	FALSE	0.000662987	0
TTN-AS1_TTN	rs7578159	2	179749052	0.224652	G	C	-0.000675711	0.000567381	0.233681	1453231042	-1.19093	FALSE	0	0	0	0.00197743	1	0	0	FALSE	0.000659143	0
TTN-AS1_TTN	rs72647851	2	179658175	0.0149105	C	T	0.00193883	0.00164585	0.23879	1453231042	1.17802	FALSE	0	0	0	0.00194742	1	0	0	FALSE	0.00064914	0
TTN-AS1_TTN	rs35770984	2	179626080	0.331014	T	A	-0.000601161	0.000510729	0.23917	1453231042	-1.17706	FALSE	0	0	0	0.00194524	1	0	0	FALSE	0.000648413	0
TTN-AS1_TTN	rs149293311	2	179678083	0.0139165	T	A	0.00192468	0.00163711	0.239731	1453231042	1.17566	FALSE	0	0	0	0.00194203	1	0	0	FALSE	0.000647343	0
FHOD3	rs9960028	18	34115326	0.27336	T	C	0.00105296	0.000562695	0.0613062	1453231042	1.87128	FALSE	0	0	0	0.00193808	1	0	0	FALSE	0.000646027	0
FHOD3	rs882877	18	34101832	0.471173	C	A	-0.000960896	0.000513784	0.0614512	1453231042	-1.87023	FALSE	0	0	0	0.00193429	1	0	0	FALSE	0.000644763	0
TTN-AS1_TTN	rs6716304	2	179746322	0.289264	G	A	-0.000620358	0.000529718	0.241555	1453231042	-1.17111	FALSE	0	0	0	0.00193168	1	0	0	FALSE	0.000643893	0
TTN-AS1_TTN	rs6711319	2	179717217	0.327038	A	G	0.000612284	0.000524316	0.242897	1453231042	1.16778	FALSE	0	0	0	0.00192417	1	0	0	FALSE	0.00064139	0
TTN-AS1_TTN	rs12465233	2	179729341	0.371769	A	G	0.000584705	0.000501046	0.243223	1453231042	1.16697	FALSE	0	0	0	0.00192236	1	0	0	FALSE	0.000640787	0
TTN-AS1_TTN	rs12469367	2	179691670	0.418489	T	C	-0.000565619	0.00048477	0.2433	1453231042	-1.16678	FALSE	0	0	0	0.00192193	1	0	0	FALSE	0.000640643	0
FHOD3	rs10502658	18	34106818	0.479125	A	G	-0.000951789	0.00051099	0.0625132	1453231042	-1.86264	FALSE	0	0	0	0.00190706	1	0	0	FALSE	0.000635687	0
TTN-AS1_TTN	rs17362581	2	179717131	0.383698	A	G	-0.0005848	0.000505079	0.246931	1453231042	-1.15784	FALSE	0	0	0	0.00190206	1	0	0	FALSE	0.00063402	0
TTN-AS1_TTN	rs12464151	2	179690909	0.419483	C	T	-0.000558584	0.000484164	0.24862	1453231042	-1.15371	FALSE	0	0	0	0.00189301	1	0	0	FALSE	0.000631003	0
TTN-AS1_TTN	rs6715406	2	179650701	0.413519	C	T	-0.000562558	0.000487632	0.248643	1453231042	-1.15365	FALSE	0	0	0	0.00189288	1	0	0	FALSE	0.00063096	0
TTN-AS1_TTN	rs62176572	2	179672863	0.220676	G	C	0.000653763	0.000568874	0.250464	1453231042	1.14922	FALSE	0	0	0	0.00188325	1	0	0	FALSE	0.00062775	0
TTN-AS1_TTN	rs6729746	2	179649349	0.415507	G	A	-0.000557909	0.000486909	0.25187	1453231042	-1.14582	FALSE	0	0	0	0.00187591	1	0	0	FALSE	0.000625303	0
TTN-AS1_TTN	rs10184892	2	179656482	0.05666	G	A	-0.00112175	0.00098262	0.253626	1453231042	-1.14159	FALSE	0	0	0	0.00186685	1	0	0	FALSE	0.000622283	0
TTN-AS1_TTN	rs883894	2	179724735	0.380716	T	C	-0.000573093	0.000503326	0.254865	1453231042	-1.13861	FALSE	0	0	0	0.00186053	1	0	0	FALSE	0.000620177	0
TTN-AS1_TTN	rs4894034	2	179547293	0.0328032	G	A	0.0017224	0.0015203	0.257243	1453231042	1.13293	FALSE	0	0	0	0.00184857	1	0	0	FALSE	0.00061619	0
TTN-AS1_TTN	rs11693733	2	179725886	0.298211	A	C	0.00131754	0.00116422	0.257764	1453231042	1.13169	FALSE	0	0	0	0.00184598	1	0	0	FALSE	0.000615327	0
FHOD3	rs11663973	18	34119817	0.374751	G	A	-0.000983441	0.000533864	0.0654577	1453231042	-1.84212	FALSE	0	0	0	0.00183593	1	0	0	FALSE	0.000611977	0
FHOD3	rs11873322	18	34140651	0.342942	G	A	-0.00101892	0.000553553	0.0656667	1453231042	-1.84069	FALSE	0	0	0	0.00183111	1	0	0	FALSE	0.00061037	0
FHOD3	rs62082358	18	34127530	0.331014	A	T	-0.00105103	0.000571539	0.0659218	1453231042	-1.83896	FALSE	0	0	0	0.00182527	1	0	0	FALSE	0.000608423	0
TTN-AS1_TTN	rs34259102	2	179726234	0.385686	A	G	-0.000563364	0.00050322	0.262919	1453231042	-1.11952	FALSE	0	0	0	0.00182085	1	0	0	FALSE	0.00060695	0
FHOD3	rs9946415	18	34170906	0.301193	T	C	-0.00105344	0.000574909	0.066897	1453231042	-1.83237	FALSE	0	0	0	0.00180333	1	0	0	FALSE	0.00060111	0
TTN-AS1_TTN	rs7561149	2	179689856	0.422465	T	C	-0.000533605	0.000482278	0.268543	1453231042	-1.10642	FALSE	0	0	0	0.00179451	1	0	0	FALSE	0.00059817	0
TTN-AS1_TTN	rs62176574	2	179680344	0.220676	G	A	0.000627166	0.000567395	0.269011	1453231042	1.10534	FALSE	0	0	0	0.00179237	1	0	0	FALSE	0.000597457	0
FHOD3	rs12961774	18	34040610	0.428429	A	G	0.000965459	0.000528128	0.0675381	1453231042	1.82808	FALSE	0	0	0	0.00178923	1	0	0	FALSE	0.00059641	0
FHOD3	rs17565834	18	34081849	0.416501	A	G	-0.000941505	0.00051513	0.0675938	1453231042	-1.8277	FALSE	0	0	0	0.00178801	1	0	0	FALSE	0.000596003	0
TTN-AS1_TTN	rs726215	2	179710973	0.214712	T	G	0.000639305	0.000583311	0.273081	1453231042	1.09599	FALSE	0	0	0	0.00177402	1	0	0	FALSE	0.00059134	0
TTN-AS1_TTN	rs6732126	2	179706142	0.220676	T	A	0.000637891	0.00058214	0.27318	1453231042	1.09577	FALSE	0	0	0	0.00177358	1	0	0	FALSE	0.000591193	0
TTN-AS1_TTN	rs10199751	2	179697519	0.316103	T	C	-0.000572084	0.000526088	0.276847	1453231042	-1.08743	FALSE	0	0	0	0.00175751	1	0	0	FALSE	0.000585837	0
TTN-AS1_TTN	rs12693167	2	179628517	0.138171	G	A	-0.0007738	0.000714022	0.278489	1453231042	-1.08372	FALSE	0	0	0	0.00175044	1	0	0	FALSE	0.00058348	0
FHOD3	rs12967971	18	34009962	0.172962	A	G	0.00128302	0.000706559	0.0693911	1453231042	1.81586	FALSE	0	0	0	0.00174986	1	0	0	FALSE	0.000583287	0
TTN-AS1_TTN	rs12468981	2	179780247	0.494036	C	T	0.000504476	0.000468599	0.281676	1453231042	1.07656	FALSE	0	0	0	0.00173696	1	0	0	FALSE	0.000578987	0
TTN-AS1_TTN	rs4894042	2	179628362	0.138171	G	A	0.000767394	0.000713098	0.281864	1453231042	1.07614	FALSE	0	0	0	0.00173617	1	0	0	FALSE	0.000578723	0
TTN-AS1_TTN	rs35107019	2	179744913	0.371769	A	C	-0.000524422	0.000489401	0.283918	1453231042	-1.07156	FALSE	0	0	0	0.00172765	1	0	0	FALSE	0.000575883	0
TTN-AS1_TTN	rs4894044	2	179632133	0.137177	A	G	0.000758851	0.000711806	0.286382	1453231042	1.06609	FALSE	0	0	0	0.00171759	1	0	0	FALSE	0.00057253	0
TTN-AS1_TTN	rs72957369	2	179705215	0.2167	T	G	0.000625754	0.000587061	0.286465	1453231042	1.06591	FALSE	0	0	0	0.00171725	1	0	0	FALSE	0.000572417	0
TTN-AS1_TTN	rs12471428	2	179687519	0.430417	C	T	-0.000510119	0.000480099	0.287995	1453231042	-1.06253	FALSE	0	0	0	0.00171109	1	0	0	FALSE	0.000570363	0
FHOD3	rs7244358	18	34165213	0.304175	G	T	0.00103904	0.000577607	0.0720395	1453231042	1.79887	FALSE	0	0	0	0.00169692	1	0	0	FALSE	0.00056564	0
TTN-AS1_TTN	rs1484118	2	179619958	0.137177	C	A	-0.000748019	0.000712719	0.293935	1453231042	-1.04953	FALSE	0	0	0	0.00168776	1	0	0	FALSE	0.000562587	0
TTN-AS1_TTN	rs73973181	2	179752984	0.0586481	T	C	-0.00103883	0.000997061	0.297463	1453231042	-1.04189	FALSE	0	0	0	0.00167433	1	0	0	FALSE	0.00055811	0
FHOD3	rs60907782	18	34122007	0.37674	G	A	-0.000949641	0.000531065	0.0737469	1453231042	-1.78818	FALSE	0	0	0	0.0016647	1	0	0	FALSE	0.0005549	0
TTN-AS1_TTN	rs62175455	2	179713762	0.217694	T	A	0.000599877	0.000578896	0.300089	1453231042	1.03624	FALSE	0	0	0	0.00166453	1	0	0	FALSE	0.000554843	0
TTN-AS1_TTN	rs2291306	2	179638238	0.0954274	G	A	0.000801702	0.000774211	0.300432	1453231042	1.03551	FALSE	0	0	0	0.00166327	1	0	0	FALSE	0.000554423	0
FHOD3	rs11662733	18	34118163	0.37674	A	G	-0.000943267	0.000528077	0.0740619	1453231042	-1.78623	FALSE	0	0	0	0.00165891	1	0	0	FALSE	0.00055297	0
TTN-AS1_TTN	rs62175453	2	179711675	0.212724	G	A	0.000597641	0.000579429	0.302339	1453231042	1.03143	FALSE	0	0	0	0.00165627	1	0	0	FALSE	0.00055209	0
FHOD3	rs1109787	18	34048108	0.45328	G	T	0.000935673	0.000524362	0.0743584	1453231042	1.7844	FALSE	0	0	0	0.0016535	1	0	0	FALSE	0.000551167	0
TTN-AS1_TTN	rs7565966	2	179742232	0.37674	T	C	-0.000497692	0.000484341	0.304154	1453231042	-1.02757	FALSE	0	0	0	0.0016497	1	0	0	FALSE	0.0005499	0
FHOD3	rs66726259	18	34171205	0.302187	A	G	0.0010154	0.000569478	0.07458	1453231042	1.78304	FALSE	0	0	0	0.00164949	1	0	0	FALSE	0.00054983	0
TTN-AS1_TTN	rs60105920	2	179747968	0.0586481	G	A	-0.0010158	0.000993718	0.306678	1453231042	-1.02222	FALSE	0	0	0	0.00164068	1	0	0	FALSE	0.000546893	0
TTN-AS1_TTN	rs16866554	2	179698945	0.0636183	G	A	0.00100777	0.000988003	0.307727	1453231042	1.02	FALSE	0	0	0	0.00163697	1	0	0	FALSE	0.000545657	0
TTN-AS1_TTN	rs7562602	2	179765674	0.403579	T	C	0.00048962	0.000481232	0.308949	1453231042	1.01743	FALSE	0	0	0	0.00163268	1	0	0	FALSE	0.000544227	0
TTN-AS1_TTN	rs4894064	2	179785383	0.43837	T	C	0.00048114	0.000474097	0.310174	1453231042	1.01486	FALSE	0	0	0	0.00162842	1	0	0	FALSE	0.000542807	0
TTN-AS1_TTN	rs2562853	2	179589769	0.028827	A	C	0.00154166	0.00152279	0.311352	1453231042	1.01239	FALSE	0	0	0	0.00162435	1	0	0	FALSE	0.00054145	0
TTN-AS1_TTN	rs13012653	2	179784247	0.493042	G	A	0.000468655	0.000464991	0.313513	1453231042	1.00788	FALSE	0	0	0	0.00161697	1	0	0	FALSE	0.00053899	0
TTN-AS1_TTN	rs17356103	2	179689843	0.222664	A	G	0.000566306	0.000562123	0.313723	1453231042	1.00744	FALSE	0	0	0	0.00161626	1	0	0	FALSE	0.000538753	0
TTN-AS1_TTN	rs11893580	2	179609245	0.138171	A	G	-0.000719405	0.000714501	0.314	1453231042	-1.00686	FALSE	0	0	0	0.00161532	1	0	0	FALSE	0.00053844	0
TTN-AS1_TTN	rs16866563	2	179712349	0.213718	T	C	0.000577577	0.00057749	0.317237	1453231042	1.00015	FALSE	0	0	0	0.00160447	1	0	0	FALSE	0.000534823	0
TTN-AS1_TTN	rs11681211	2	179695237	0.219682	G	A	0.000560126	0.000564308	0.32091	1453231042	0.99259	FALSE	0	0	0	0.00159243	1	0	0	FALSE	0.00053081	0
TTN-AS1_TTN	rs2627038	2	179553917	0.0755467	G	A	0.000974802	0.00098216	0.32095	1453231042	0.992508	FALSE	0	0	0	0.0015923	1	0	0	FALSE	0.000530767	0
TTN-AS1_TTN	rs13019110	2	179785274	0.492048	C	T	0.000459878	0.000464425	0.322071	1453231042	0.99021	FALSE	0	0	0	0.00158868	1	0	0	FALSE	0.00052956	0
TTN-AS1_TTN	rs6750760	2	179759810	0.402584	G	A	0.000472946	0.000480419	0.324897	1453231042	0.984444	FALSE	0	0	0	0.00157966	1	0	0	FALSE	0.000526553	0
FHOD3	rs505601	18	34280131	0.16998	G	A	0.00346713	0.00197396	0.0790144	1453231042	1.75643	FALSE	0	0	0	0.00157362	1	0	0	FALSE	0.00052454	0
TTN-AS1_TTN	rs6752756	2	179741105	0.0586481	C	T	-0.000961117	0.000990651	0.331953	1453231042	-0.970188	FALSE	0	0	0	0.0015578	1	0	0	FALSE	0.000519267	0
TTN-AS1_TTN	rs76280783	2	179752945	0.0954274	C	T	-0.000874441	0.000903781	0.333276	1453231042	-0.967536	FALSE	0	0	0	0.00155381	1	0	0	FALSE	0.000517937	0
TTN-AS1_TTN	rs142373864	2	179754666	0.026839	T	C	-0.00174373	0.00180304	0.333493	1453231042	-0.967102	FALSE	0	0	0	0.00155315	1	0	0	FALSE	0.000517717	0
TTN-AS1_TTN	rs62175451	2	179699384	0.22167	A	G	0.000554733	0.000578419	0.337533	1453231042	0.959051	FALSE	0	0	0	0.00154116	1	0	0	FALSE	0.00051372	0
TTN-AS1_TTN	rs2366913	2	179693775	0.478131	C	T	-0.00190604	0.00198876	0.337858	1453231042	-0.958406	FALSE	0	0	0	0.0015402	1	0	0	FALSE	0.0005134	0
TTN-AS1_TTN	rs2303828	2	179547860	0.175944	A	G	-0.00253126	0.00266397	0.34202	1453231042	-0.950182	FALSE	0	0	0	0.00152816	1	0	0	FALSE	0.000509387	0
TTN-AS1_TTN	rs75886803	2	179740338	0.0586481	A	G	-0.000937541	0.000989378	0.34333	1453231042	-0.947606	FALSE	0	0	0	0.00152443	1	0	0	FALSE	0.000508143	0
TTN-AS1_TTN	rs1489487	2	179778444	0.397614	G	A	0.000453049	0.000480711	0.345959	1453231042	0.942457	FALSE	0	0	0	0.00151703	1	0	0	FALSE	0.000505677	0
TTN-AS1_TTN	rs12990128	2	179780855	0.397614	C	A	0.000452504	0.000480795	0.346623	1453231042	0.941159	FALSE	0	0	0	0.00151518	1	0	0	FALSE	0.00050506	0
TTN-AS1_TTN	rs6724114	2	179778417	0.397614	C	T	0.000452071	0.000480669	0.34696	1453231042	0.940503	FALSE	0	0	0	0.00151425	1	0	0	FALSE	0.00050475	0
TTN-AS1_TTN	rs10497521	2	179651250	0.186879	T	C	0.0022844	0.00244244	0.349635	1453231042	0.935297	FALSE	0	0	0	0.00150687	1	0	0	FALSE	0.00050229	0
FHOD3	rs9966518	18	34126256	0.369781	G	A	-0.000906854	0.000527415	0.0855359	1453231042	-1.71943	FALSE	0	0	0	0.00147561	1	0	0	FALSE	0.00049187	0
FHOD3	rs903738	18	34124843	0.282306	C	T	-0.0009921	0.00057759	0.08586	1453231042	-1.71765	FALSE	0	0	0	0.00147111	1	0	0	FALSE	0.00049037	0
TTN-AS1_TTN	rs10167882	2	179776290	0.403579	G	T	0.000431591	0.000478157	0.366731	1453231042	0.902614	FALSE	0	0	0	0.00146229	1	0	0	FALSE	0.00048743	0
TTN-AS1_TTN	rs72648970	2	179586604	0.0367793	C	G	-0.00117341	0.00130277	0.367747	1453231042	-0.900701	FALSE	0	0	0	0.00145977	1	0	0	FALSE	0.00048659	0
TTN-AS1_TTN	rs2042995	2	179558366	0.245527	T	C	-0.00211776	0.00237088	0.371729	1453231042	-0.893239	FALSE	0	0	0	0.00145003	1	0	0	FALSE	0.000483343	0
TTN-AS1_TTN	rs114829390	2	179770340	0.102386	A	G	-0.00080876	0.000906639	0.372371	1453231042	-0.892041	FALSE	0	0	0	0.00144848	1	0	0	FALSE	0.000482827	0
TTN-AS1_TTN	rs17453375	2	179705073	0.0467197	G	T	-0.00096296	0.00107968	0.372448	1453231042	-0.891896	FALSE	0	0	0	0.00144829	1	0	0	FALSE	0.000482763	0
FHOD3	rs62083974	18	34183641	0.217694	A	G	-0.00113251	0.000663412	0.0878044	1453231042	-1.7071	FALSE	0	0	0	0.00144475	1	0	0	FALSE	0.000481583	0
FHOD3	rs12971227	18	34129964	0.290258	C	A	-0.000961934	0.000564333	0.088278	1453231042	-1.70455	FALSE	0	0	0	0.0014385	1	0	0	FALSE	0.0004795	0
TTN-AS1_TTN	rs114742263	2	179591708	0.027833	C	T	0.00133938	0.00151587	0.376926	1453231042	0.883574	FALSE	0	0	0	0.00143763	1	0	0	FALSE	0.00047921	0
TTN-AS1_TTN	rs12622500	2	179713329	0.0526839	C	G	-0.000943543	0.00106909	0.377471	1453231042	-0.882566	FALSE	0	0	0	0.00143635	1	0	0	FALSE	0.000478783	0
FHOD3	rs4799868	18	34126858	0.27833	A	G	0.000955118	0.000561572	0.0889819	1453231042	1.70079	FALSE	0	0	0	0.00142932	1	0	0	FALSE	0.00047644	0
TTN-AS1_TTN	rs72648982	2	179582853	0.027833	T	C	0.00133047	0.00151771	0.380685	1453231042	0.876635	FALSE	0	0	0	0.00142888	1	0	0	FALSE	0.000476293	0
TTN-AS1_TTN	rs73973173	2	179730268	0.0536779	A	G	-0.000870025	0.000993856	0.381354	1453231042	-0.875403	FALSE	0	0	0	0.00142734	1	0	0	FALSE	0.00047578	0
TTN-AS1_TTN	rs55844607	2	179770998	0.101392	A	G	-0.000727706	0.000836694	0.384443	1453231042	-0.86974	FALSE	0	0	0	0.0014203	1	0	0	FALSE	0.000473433	0
TTN-AS1_TTN	rs73973171	2	179722521	0.054672	A	G	-0.000850539	0.000990831	0.390666	1453231042	-0.85841	FALSE	0	0	0	0.00140646	1	0	0	FALSE	0.00046882	0
FHOD3	rs8087852	18	34154176	0.322068	A	G	0.000927158	0.000550219	0.091975	1453231042	1.68507	FALSE	0	0	0	0.00139178	1	0	0	FALSE	0.000463927	0
TTN-AS1_TTN	rs116215934	2	179658421	0.0298211	C	T	0.00124513	0.00148879	0.402966	1453231042	0.836335	FALSE	0	0	0	0.0013804	1	0	0	FALSE	0.000460133	0
FHOD3	rs4799428	18	34295845	0.0228628	T	C	-0.00366617	0.00218258	0.0930087	1453231042	-1.67974	FALSE	0	0	0	0.00137934	1	0	0	FALSE	0.00045978	0
FHOD3	rs17566030	18	34099330	0.400596	C	T	-0.000859911	0.0005121	0.0931159	1453231042	-1.67919	FALSE	0	0	0	0.00137807	1	0	0	FALSE	0.000459357	0
TTN-AS1_TTN	rs115255917	2	179785125	0.026839	T	C	-0.00149921	0.00180762	0.406888	1453231042	-0.829383	FALSE	0	0	0	0.00137243	1	0	0	FALSE	0.000457477	0
FHOD3	rs1790643	18	34045251	0.4334	A	G	0.000862074	0.000514781	0.0940046	1453231042	1.67464	FALSE	0	0	0	0.00136761	1	0	0	FALSE	0.00045587	0
FHOD3	rs1790645	18	34046648	0.442346	G	A	0.000868898	0.000518876	0.0940174	1453231042	1.67458	FALSE	0	0	0	0.00136746	1	0	0	FALSE	0.00045582	0
FHOD3	rs903736	18	34101676	0.253479	G	T	-0.000956366	0.000571658	0.0943335	1453231042	-1.67297	FALSE	0	0	0	0.00136378	1	0	0	FALSE	0.000454593	0
TTN-AS1_TTN	rs74954944	2	179696827	0.0636183	G	C	0.000823569	0.00101173	0.415632	1453231042	0.814023	FALSE	0	0	0	0.00135522	1	0	0	FALSE	0.00045174	0
FHOD3	rs17650954	18	34093076	0.0884692	A	G	0.00159406	0.000955659	0.0953108	1453231042	1.66802	FALSE	0	0	0	0.00135257	1	0	0	FALSE	0.000450857	0
TTN-AS1_TTN	rs35813871	2	179650408	0.215706	G	A	0.000451549	0.000556715	0.417311	1453231042	0.811095	FALSE	0	0	0	0.001352	1	0	0	FALSE	0.000450667	0
TTN-AS1_TTN	rs10171049	2	179621864	0.0854871	G	A	0.000733039	0.000905489	0.418199	1453231042	0.809551	FALSE	0	0	0	0.0013503	1	0	0	FALSE	0.0004501	0
TTN-AS1_TTN	rs78123462	2	179776408	0.0695825	T	C	-0.000711298	0.00088262	0.420304	1453231042	-0.805894	FALSE	0	0	0	0.00134632	1	0	0	FALSE	0.000448773	0
TTN-AS1_TTN	rs111715355	2	179808267	0.027833	G	C	-0.00141733	0.00177027	0.423344	1453231042	-0.800633	FALSE	0	0	0	0.00134065	1	0	0	FALSE	0.000446883	0
TTN-AS1_TTN	rs7604033	2	179626017	0.0854871	C	T	0.000722601	0.000906857	0.425556	1453231042	0.79682	FALSE	0	0	0	0.00133657	1	0	0	FALSE	0.000445523	0
TTN-AS1_TTN	rs2291311	2	179629461	0.085487	C	T	-0.000721166	0.00090629	0.426187	1453231042	-0.795733	FALSE	0	0	0	0.00133541	1	0	0	FALSE	0.000445137	0
FHOD3	rs12606167	18	34047480	0.120278	G	A	0.00126622	0.000763877	0.0973927	1453231042	1.65763	FALSE	0	0	0	0.00132938	1	0	0	FALSE	0.000443127	0
TTN-AS1_TTN	rs55807016	2	179716856	0.054672	G	A	-0.000777708	0.000988461	0.431407	1453231042	-0.786787	FALSE	0	0	0	0.00132599	1	0	0	FALSE	0.000441997	0
TTN-AS1_TTN	rs77841333	2	179624788	0.0854871	A	T	0.000712095	0.000906177	0.431971	1453231042	0.785823	FALSE	0	0	0	0.00132499	1	0	0	FALSE	0.000441663	0
TTN-AS1_TTN	rs74805196	2	179619400	0.0854871	T	C	0.000706992	0.00090584	0.435107	1453231042	0.780482	FALSE	0	0	0	0.00131946	1	0	0	FALSE	0.00043982	0
TTN-AS1_TTN	rs2291309	2	179623577	0.0854871	G	T	0.00304696	0.0039311	0.438286	1453231042	0.77509	FALSE	0	0	0	0.00131394	1	0	0	FALSE	0.00043798	0
TTN-AS1_TTN	rs80182096	2	179726125	0.054672	G	A	-0.000764096	0.000987427	0.439034	1453231042	-0.773825	FALSE	0	0	0	0.00131265	1	0	0	FALSE	0.00043755	0
TTN-AS1_TTN	rs11690299	2	179697415	0.354871	T	C	0.000380392	0.000492031	0.439459	1453231042	0.773107	FALSE	0	0	0	0.00131192	1	0	0	FALSE	0.000437307	0
TTN-AS1_TTN	rs2291310	2	179623758	0.085487	C	T	-0.000698662	0.000905497	0.440364	1453231042	-0.771579	FALSE	0	0	0	0.00131037	1	0	0	FALSE	0.00043679	0
TTN-AS1_TTN	rs72957330	2	179681220	0.17992	C	T	0.000473016	0.000613266	0.440526	1453231042	0.771306	FALSE	0	0	0	0.0013101	1	0	0	FALSE	0.0004367	0
TTN-AS1_TTN	rs2742336	2	179573365	0.0318091	G	T	0.00110528	0.00143701	0.441801	1453231042	0.769156	FALSE	0	0	0	0.00130793	1	0	0	FALSE	0.000435977	0
TTN-AS1_TTN	rs12052272	2	179728556	0.300199	A	G	0.000394254	0.000514232	0.443268	1453231042	0.766686	FALSE	0	0	0	0.00130545	1	0	0	FALSE	0.00043515	0
TTN-AS1_TTN	rs56736089	2	179756463	0.0586481	A	C	-0.000714934	0.000932893	0.443461	1453231042	-0.766362	FALSE	0	0	0	0.00130513	1	0	0	FALSE	0.000435043	0
TTN-AS1_TTN	rs2291312	2	179631214	0.084493	T	C	0.000690237	0.000905103	0.445698	1453231042	0.762606	FALSE	0	0	0	0.00130138	1	0	0	FALSE	0.000433793	0
TTN-AS1_TTN	rs2742329	2	179580434	0.028827	A	G	0.00115153	0.00151287	0.446566	1453231042	0.761153	FALSE	0	0	0	0.00129994	1	0	0	FALSE	0.000433313	0
FHOD3	rs9635886	18	34106087	0.405567	T	C	-0.000837936	0.000511163	0.101156	1453231042	-1.63928	FALSE	0	0	0	0.00128977	1	0	0	FALSE	0.000429923	0
TTN-AS1_TTN	rs2742340	2	179571942	0.0298211	C	T	0.00111025	0.00148495	0.454659	1453231042	0.747671	FALSE	0	0	0	0.00128679	1	0	0	FALSE	0.00042893	0
TTN-AS1_TTN	rs2742333	2	179573633	0.0298211	T	C	0.0011056	0.00148487	0.456531	1453231042	0.744571	FALSE	0	0	0	0.00128382	1	0	0	FALSE	0.00042794	0
TTN-AS1_TTN	rs76112037	2	179759151	0.0596421	A	G	-0.000692074	0.000931615	0.457557	1453231042	-0.742876	FALSE	0	0	0	0.0012822	1	0	0	FALSE	0.0004274	0
TTN-AS1_TTN	rs76465131	2	179572897	0.0964215	C	G	0.000569354	0.000771699	0.46064	1453231042	0.737793	FALSE	0	0	0	0.00127738	1	0	0	FALSE	0.000425793	0
TTN-AS1_TTN	rs12693171	2	179748447	0.154076	T	C	-0.000497984	0.000675046	0.460694	1453231042	-0.737705	FALSE	0	0	0	0.0012773	1	0	0	FALSE	0.000425767	0
TTN-AS1_TTN	rs77177339	2	179699779	0.0506958	A	G	-0.000808291	0.00110077	0.462767	1453231042	-0.734298	FALSE	0	0	0	0.0012741	1	0	0	FALSE	0.0004247	0
TTN-AS1_TTN	rs998329	2	179684239	0.054672	G	A	-0.000736739	0.0010065	0.46418	1453231042	-0.731982	FALSE	0	0	0	0.00127194	1	0	0	FALSE	0.00042398	0
TTN-AS1_TTN	rs2562832	2	179581835	0.028827	C	A	0.00109923	0.00150472	0.46507	1453231042	0.730524	FALSE	0	0	0	0.00127058	1	0	0	FALSE	0.000423527	0
FHOD3	rs1565979	18	34148581	0.33002	C	G	-0.000878738	0.00053921	0.10317	1453231042	-1.62968	FALSE	0	0	0	0.00126969	1	0	0	FALSE	0.00042323	0
TTN-AS1_TTN	rs115150884	2	179793839	0.028827	C	G	-0.00108485	0.00149557	0.468223	1453231042	-0.725373	FALSE	0	0	0	0.00126583	1	0	0	FALSE	0.000421943	0
TTN-AS1_TTN	rs2742328	2	179585963	0.028827	A	G	0.00109011	0.00150513	0.468905	1453231042	0.724261	FALSE	0	0	0	0.00126481	1	0	0	FALSE	0.000421603	0
FHOD3	rs11872827	18	34047912	0.121272	T	G	0.00123887	0.000761931	0.10396	1453231042	1.62595	FALSE	0	0	0	0.00126202	1	0	0	FALSE	0.000420673	0
TTN-AS1_TTN	rs74729973	2	179757791	0.0586481	G	A	-0.000670912	0.000931095	0.471179	1453231042	-0.720563	FALSE	0	0	0	0.00126143	1	0	0	FALSE	0.000420477	0
TTN-AS1_TTN	rs2243804	2	179589919	0.028827	A	C	0.0010745	0.00150448	0.475103	1453231042	0.7142	FALSE	0	0	0	0.00125569	1	0	0	FALSE	0.000418563	0
TTN-AS1_TTN	rs56030306	2	179688530	0.0497018	G	T	-0.000795611	0.00111496	0.475487	1453231042	-0.71358	FALSE	0	0	0	0.00125513	1	0	0	FALSE	0.000418377	0
TTN-AS1_TTN	rs922984	2	179615887	0.086481	T	C	-0.000636919	0.000893708	0.47605	1453231042	-0.71267	FALSE	0	0	0	0.00125432	1	0	0	FALSE	0.000418107	0
TTN-AS1_TTN	rs74841078	2	179679810	0.0497018	C	T	-0.000792428	0.00111338	0.476633	1453231042	-0.711729	FALSE	0	0	0	0.00125348	1	0	0	FALSE	0.000417827	0
TTN-AS1_TTN	rs2742339	2	179571972	0.028827	G	C	0.00106814	0.00150325	0.477359	1453231042	0.710557	FALSE	0	0	0	0.00125244	1	0	0	FALSE	0.00041748	0
TTN-AS1_TTN	rs79146658	2	179786068	0.100398	T	C	-0.000596912	0.000840082	0.477369	1453231042	-0.71054	FALSE	0	0	0	0.00125242	1	0	0	FALSE	0.000417473	0
TTN-AS1_TTN	rs6717039	2	179706230	0.286282	C	T	0.00155086	0.002183	0.477439	1453231042	0.710428	FALSE	0	0	0	0.00125232	1	0	0	FALSE	0.00041744	0
TTN-AS1_TTN	rs67113930	2	179741348	0.162028	A	G	-0.000444988	0.000626607	0.477608	1453231042	-0.710155	FALSE	0	0	0	0.00125208	1	0	0	FALSE	0.00041736	0
TTN-AS1_TTN	rs72647887	2	179633277	0.0347913	C	T	0.0047783	0.00672861	0.477614	1453231042	0.710146	FALSE	0	0	0	0.00125207	1	0	0	FALSE	0.000417357	0
TTN-AS1_TTN	rs2742341	2	179570122	0.028827	C	A	0.00106595	0.00150322	0.478254	1453231042	0.709114	FALSE	0	0	0	0.00125115	1	0	0	FALSE	0.00041705	0
TTN-AS1_TTN	rs2562854	2	179592735	0.028827	C	A	0.00106603	0.0015042	0.47851	1453231042	0.708701	FALSE	0	0	0	0.00125079	1	0	0	FALSE	0.00041693	0
TTN-AS1_TTN	rs4894066	2	179787329	0.0745527	T	C	-0.000622085	0.000878115	0.478677	1453231042	-0.708432	FALSE	0	0	0	0.00125055	1	0	0	FALSE	0.00041685	0
TTN-AS1_TTN	rs76366029	2	179676118	0.0497018	G	T	-0.000788224	0.00111309	0.478859	1453231042	-0.708139	FALSE	0	0	0	0.00125029	1	0	0	FALSE	0.000416763	0
TTN-AS1_TTN	rs76647828	2	179678889	0.0497018	A	G	-0.000788046	0.00111308	0.478955	1453231042	-0.707984	FALSE	0	0	0	0.00125015	1	0	0	FALSE	0.000416717	0
FHOD3	rs12969915	18	34107206	0.100398	G	A	0.00541953	0.00334546	0.10524	1453231042	1.61996	FALSE	0	0	0	0.00124981	1	0	0	FALSE	0.000416603	0
FHOD3	rs8097509	18	34089856	0.0854871	C	G	-0.00140074	0.000864836	0.105305	1453231042	-1.61966	FALSE	0	0	0	0.0012492	1	0	0	FALSE	0.0004164	0
FHOD3	rs61735998	18	34289285	0.0228628	G	T	0.00306525	0.00189361	0.105504	1453231042	1.61873	FALSE	0	0	0	0.00124733	1	0	0	FALSE	0.000415777	0
TTN-AS1_TTN	rs74911159	2	179777035	0.05666	G	A	-0.000660982	0.000938224	0.481119	1453231042	-0.704504	FALSE	0	0	0	0.00124708	1	0	0	FALSE	0.000415693	0
TTN-AS1_TTN	rs75135012	2	179761908	0.055666	G	A	-0.000661615	0.000941592	0.48227	1453231042	-0.702656	FALSE	0	0	0	0.00124546	1	0	0	FALSE	0.000415153	0
TTN-AS1_TTN	rs116714897	2	179674471	0.0497018	T	G	-0.000781556	0.00111285	0.482492	1453231042	-0.702301	FALSE	0	0	0	0.00124515	1	0	0	FALSE	0.00041505	0
TTN-AS1_TTN	rs2627034	2	179573407	0.0318091	T	G	0.00101131	0.00144636	0.484419	1453231042	0.699212	FALSE	0	0	0	0.00124246	1	0	0	FALSE	0.000414153	0
TTN-AS1_TTN	rs2562835	2	179580068	0.0318091	A	C	0.00100496	0.00144628	0.487145	1453231042	0.694857	FALSE	0	0	0	0.00123869	1	0	0	FALSE	0.000412897	0
TTN-AS1_TTN	rs1032282	2	179758007	0.142147	C	T	0.000483987	0.000697624	0.48783	1453231042	0.693765	FALSE	0	0	0	0.00123776	1	0	0	FALSE	0.000412587	0
TTN-AS1_TTN	rs2742337	2	179573101	0.0318091	G	A	0.00100268	0.00144557	0.487917	1453231042	0.693625	FALSE	0	0	0	0.00123764	1	0	0	FALSE	0.000412547	0
TTN-AS1_TTN	rs72648978	2	179583317	0.0944334	G	A	0.000532794	0.000769303	0.488581	1453231042	0.692567	FALSE	0	0	0	0.00123673	1	0	0	FALSE	0.000412243	0
TTN-AS1_TTN	rs59415652	2	179682415	0.0536779	G	A	-0.000697249	0.00100702	0.488693	1453231042	-0.69239	FALSE	0	0	0	0.00123658	1	0	0	FALSE	0.000412193	0
TTN-AS1_TTN	rs75748886	2	179687500	0.0526839	C	T	-0.000760465	0.00109868	0.488836	1453231042	-0.692161	FALSE	0	0	0	0.00123638	1	0	0	FALSE	0.000412127	0
TTN-AS1_TTN	rs1565286	2	179749373	0.162028	C	A	-0.00043584	0.000629952	0.489024	1453231042	-0.691862	FALSE	0	0	0	0.00123612	1	0	0	FALSE	0.00041204	0
TTN-AS1_TTN	rs1016799	2	179749332	0.162028	C	T	-0.000435528	0.000629947	0.489332	1453231042	-0.691372	FALSE	0	0	0	0.00123571	1	0	0	FALSE	0.000411903	0
TTN-AS1_TTN	rs2562830	2	179585393	0.224652	A	G	-0.00040004	0.000579065	0.489667	1453231042	-0.690838	FALSE	0	0	0	0.00123525	1	0	0	FALSE	0.00041175	0
TTN-AS1_TTN	rs2562842	2	179573394	0.0318091	A	G	0.000997425	0.00144542	0.490158	1453231042	0.690057	FALSE	0	0	0	0.00123458	1	0	0	FALSE	0.000411527	0
TTN-AS1_TTN	rs2742334	2	179573454	0.0318091	C	T	0.000995457	0.00144566	0.491084	1453231042	0.688585	FALSE	0	0	0	0.00123333	1	0	0	FALSE	0.00041111	0
TTN-AS1_TTN	rs80289304	2	179768423	0.055666	T	A	-0.000647423	0.000940843	0.491371	1453231042	-0.68813	FALSE	0	0	0	0.00123295	1	0	0	FALSE	0.000410983	0
TTN-AS1_TTN	rs2562837	2	179579694	0.0318091	T	A	0.000992273	0.00144585	0.492531	1453231042	0.686289	FALSE	0	0	0	0.00123139	1	0	0	FALSE	0.000410463	0
TTN-AS1_TTN	rs2130221	2	179750087	0.162028	T	C	-0.00043211	0.000629689	0.49257	1453231042	-0.686227	FALSE	0	0	0	0.00123133	1	0	0	FALSE	0.000410443	0
TTN-AS1_TTN	rs2742335	2	179573424	0.0318091	C	T	0.000990422	0.00144538	0.493197	1453231042	0.685233	FALSE	0	0	0	0.0012305	1	0	0	FALSE	0.000410167	0
TTN-AS1_TTN	rs72647839	2	179672462	0.0497018	A	G	-0.000762039	0.00111224	0.493256	1453231042	-0.685139	FALSE	0	0	0	0.00123042	1	0	0	FALSE	0.00041014	0
TTN-AS1_TTN	rs2742330	2	179578937	0.0318091	A	G	0.000986867	0.00144517	0.494689	1453231042	0.682871	FALSE	0	0	0	0.00122851	1	0	0	FALSE	0.000409503	0
TTN-AS1_TTN	rs2130220	2	179787062	0.39662	G	C	-0.000327433	0.00047964	0.49482	1453231042	-0.682663	FALSE	0	0	0	0.00122833	1	0	0	FALSE	0.000409443	0
FHOD3	rs10468844	18	34005890	0.235586	A	G	0.000930758	0.000578698	0.107755	1453231042	1.60837	FALSE	0	0	0	0.00122663	1	0	0	FALSE	0.000408877	0
TTN-AS1_TTN	rs79595351	2	179684957	0.0497018	G	A	-0.000756464	0.00111155	0.496156	1453231042	-0.68055	FALSE	0	0	0	0.00122657	1	0	0	FALSE	0.000408857	0
TTN-AS1_TTN	rs3754953	2	179618019	0.085487	T	A	-0.000611311	0.000900523	0.497239	1453231042	-0.67884	FALSE	0	0	0	0.00122514	1	0	0	FALSE	0.00040838	0
TTN-AS1_TTN	rs145967799	2	179768456	0.055666	A	T	-0.000636638	0.000940533	0.498475	1453231042	-0.676891	FALSE	0	0	0	0.00122352	1	0	0	FALSE	0.00040784	0
TTN-AS1_TTN	rs2562851	2	179551112	0.026839	G	C	0.00103326	0.0015279	0.498878	1453231042	0.676256	FALSE	0	0	0	0.001223	1	0	0	FALSE	0.000407667	0
TTN-AS1_TTN	rs56988799	2	179690535	0.054672	G	T	-0.000663013	0.000988272	0.502296	1453231042	-0.670881	FALSE	0	0	0	0.00121858	1	0	0	FALSE	0.000406193	0
TTN-AS1_TTN	rs12693169	2	179697126	0.360835	G	A	-0.000335958	0.000504007	0.505044	1453231042	-0.666575	FALSE	0	0	0	0.00121507	1	0	0	FALSE	0.000405023	0
FHOD3	rs7231406	18	34224459	0.104374	G	A	-0.00139018	0.000868395	0.109406	1453231042	-1.60087	FALSE	0	0	0	0.00121196	1	0	0	FALSE	0.000403987	0
TTN-AS1_TTN	rs142337553	2	179692239	0.0298211	G	A	0.00097157	0.00146656	0.507661	1453231042	0.662484	FALSE	0	0	0	0.00121178	1	0	0	FALSE	0.000403927	0
TTN-AS1_TTN	rs2562852	2	179589371	0.028827	G	T	0.000987006	0.00149438	0.508947	1453231042	0.660478	FALSE	0	0	0	0.00121017	1	0	0	FALSE	0.00040339	0
TTN-AS1_TTN	rs2742342	2	179570114	0.0318091	A	T	0.000943675	0.00143981	0.512201	1453231042	0.655414	FALSE	0	0	0	0.00120614	1	0	0	FALSE	0.000402047	0
TTN-AS1_TTN	rs1489481	2	179703402	0.242545	C	G	-0.000360099	0.000555491	0.51682	1453231042	-0.648255	FALSE	0	0	0	0.00120053	1	0	0	FALSE	0.000400177	0
FHOD3	rs2901813	18	34085952	0.0864811	A	G	-0.00136528	0.000856484	0.110926	1453231042	-1.59405	FALSE	0	0	0	0.00119883	1	0	0	FALSE	0.00039961	0
TTN-AS1_TTN	rs78330357	2	179787303	0.0576541	A	G	-0.00060219	0.000935356	0.5197	1453231042	-0.643808	FALSE	0	0	0	0.00119708	1	0	0	FALSE	0.000399027	0
FHOD3	rs72893828	18	34109445	0.402584	G	T	-0.000808868	0.000508089	0.111389	1453231042	-1.59198	FALSE	0	0	0	0.00119489	1	0	0	FALSE	0.000398297	0
TTN-AS1_TTN	rs73973186	2	179780448	0.137177	A	G	-0.00045122	0.000708809	0.524392	1453231042	-0.636589	FALSE	0	0	0	0.00119156	1	0	0	FALSE	0.000397187	0
TTN-AS1_TTN	rs2627037	2	179606538	0.0874751	G	A	0.000552834	0.000874524	0.527287	1453231042	0.632153	FALSE	0	0	0	0.00118822	1	0	0	FALSE	0.000396073	0
TTN-AS1_TTN	rs4894060	2	179751817	0.153082	T	A	-0.0004257	0.000674622	0.528027	1453231042	-0.63102	FALSE	0	0	0	0.00118737	1	0	0	FALSE	0.00039579	0
TTN-AS1_TTN	rs16866532	2	179645285	0.0487078	C	G	-0.000696073	0.00110377	0.52828	1453231042	-0.630633	FALSE	0	0	0	0.00118708	1	0	0	FALSE	0.000395693	0
TTN-AS1_TTN	rs12464703	2	179645731	0.0487078	C	A	-0.000693569	0.00110383	0.529789	1453231042	-0.628328	FALSE	0	0	0	0.00118535	1	0	0	FALSE	0.000395117	0
TTN-AS1_TTN	rs13405116	2	179739483	0.32505	A	G	-0.000313125	0.000498694	0.530076	1453231042	-0.62789	FALSE	0	0	0	0.00118503	1	0	0	FALSE	0.00039501	0
TTN-AS1_TTN	rs77147529	2	179744148	0.0775348	G	A	-0.00227966	0.00363105	0.530119	1453231042	-0.627824	FALSE	0	0	0	0.00118498	1	0	0	FALSE	0.000394993	0
TTN-AS1_TTN	rs11885885	2	179691728	0.054672	C	A	-0.000632464	0.00100982	0.531111	1453231042	-0.626311	FALSE	0	0	0	0.00118386	1	0	0	FALSE	0.00039462	0
TTN-AS1_TTN	rs6734390	2	179711748	0.154076	T	C	0.00157743	0.00252022	0.531374	1453231042	0.62591	FALSE	0	0	0	0.00118356	1	0	0	FALSE	0.00039452	0
TTN-AS1_TTN	rs11884950	2	179746213	0.151093	C	T	0.000420649	0.000672289	0.531514	1453231042	0.625697	FALSE	0	0	0	0.0011834	1	0	0	FALSE	0.000394467	0
TTN-AS1_TTN	rs4894058	2	179738505	0.326044	T	C	-0.000311428	0.000498749	0.532353	1453231042	-0.624417	FALSE	0	0	0	0.00118246	1	0	0	FALSE	0.000394153	0
FHOD3	rs74341501	18	34227528	0.0218688	A	G	-0.00319907	0.00201917	0.113114	1453231042	-1.58435	FALSE	0	0	0	0.00118049	1	0	0	FALSE	0.000393497	0
TTN-AS1_TTN	rs2306636	2	179634936	0.0506958	C	T	-0.000676842	0.00109079	0.534925	1453231042	-0.620505	FALSE	0	0	0	0.00117958	1	0	0	FALSE	0.000393193	0
TTN-AS1_TTN	rs2291308	2	179644160	0.0487078	T	C	-0.000682611	0.00110285	0.535947	1453231042	-0.618953	FALSE	0	0	0	0.00117845	1	0	0	FALSE	0.000392817	0
TTN-AS1_TTN	rs2291304	2	179635850	0.0506958	T	C	-0.000669775	0.00108952	0.538724	1453231042	-0.614743	FALSE	0	0	0	0.00117539	1	0	0	FALSE	0.000391797	0
TTN-AS1_TTN	rs12693173	2	179757013	0.141153	C	T	0.000428913	0.000698824	0.539371	1453231042	0.613765	FALSE	0	0	0	0.00117468	1	0	0	FALSE	0.00039156	0
TTN-AS1_TTN	rs2291305	2	179636257	0.0506958	T	A	-0.00066866	0.00108955	0.539413	1453231042	-0.613701	FALSE	0	0	0	0.00117464	1	0	0	FALSE	0.000391547	0
TTN-AS1_TTN	rs56142888	2	179637861	0.0487078	C	G	-0.000674687	0.00110218	0.540445	1453231042	-0.61214	FALSE	0	0	0	0.00117351	1	0	0	FALSE	0.00039117	0
TTN-AS1_TTN	rs12476289	2	179641975	0.0487078	C	T	-0.000674916	0.00110305	0.540629	1453231042	-0.611863	FALSE	0	0	0	0.00117331	1	0	0	FALSE	0.000391103	0
TTN-AS1_TTN	rs2086832	2	179715596	0.310139	T	A	0.000311922	0.000509866	0.540688	1453231042	0.611772	FALSE	0	0	0	0.00117325	1	0	0	FALSE	0.000391083	0
TTN-AS1_TTN	rs1883085	2	179604160	0.0477137	T	G	-0.000671742	0.00109955	0.541249	1453231042	-0.610925	FALSE	0	0	0	0.00117264	1	0	0	FALSE	0.00039088	0
TTN-AS1_TTN	rs80133134	2	179636668	0.0506958	T	C	-0.000665225	0.00109236	0.542539	1453231042	-0.608977	FALSE	0	0	0	0.00117125	1	0	0	FALSE	0.000390417	0
TTN-AS1_TTN	rs10165253	2	179732997	0.249503	A	T	-0.000325457	0.000534998	0.542967	1453231042	-0.608333	FALSE	0	0	0	0.00117079	1	0	0	FALSE	0.000390263	0
TTN-AS1_TTN	rs72647889	2	179633090	0.0487078	A	G	-0.000667592	0.00109783	0.543122	1453231042	-0.608099	FALSE	0	0	0	0.00117062	1	0	0	FALSE	0.000390207	0
TTN-AS1_TTN	rs7564036	2	179704973	0.0367793	G	A	-0.000736777	0.00121174	0.543166	1453231042	-0.608032	FALSE	0	0	0	0.00117058	1	0	0	FALSE	0.000390193	0
TTN-AS1_TTN	rs11902709	2	179608207	0.0506958	C	T	-0.000652673	0.00108052	0.545821	1453231042	-0.604034	FALSE	0	0	0	0.00116774	1	0	0	FALSE	0.000389247	0
TTN-AS1_TTN	rs2253324	2	179603225	0.0477137	G	A	-0.000663827	0.00109912	0.545868	1453231042	-0.603963	FALSE	0	0	0	0.00116769	1	0	0	FALSE	0.00038923	0
TTN-AS1_TTN	rs74733167	2	179607487	0.0477137	T	C	-0.000663542	0.00109939	0.546138	1453231042	-0.603557	FALSE	0	0	0	0.00116741	1	0	0	FALSE	0.000389137	0
TTN-AS1_TTN	rs10183734	2	179747421	0.254473	T	C	-0.000322382	0.000535778	0.547369	1453231042	-0.601707	FALSE	0	0	0	0.00116611	1	0	0	FALSE	0.000388703	0
TTN-AS1_TTN	rs1883084	2	179604742	0.0477137	G	A	-0.0006608	0.00109943	0.547816	1453231042	-0.601037	FALSE	0	0	0	0.00116564	1	0	0	FALSE	0.000388547	0
TTN-AS1_TTN	rs114100829	2	179799576	0.0924453	T	C	-0.000513279	0.00085548	0.548513	1453231042	-0.59999	FALSE	0	0	0	0.0011649	1	0	0	FALSE	0.0003883	0
TTN-AS1_TTN	rs12470905	2	179631851	0.0506958	C	A	-0.000651614	0.0010865	0.548681	1453231042	-0.599738	FALSE	0	0	0	0.00116473	1	0	0	FALSE	0.000388243	0
TTN-AS1_TTN	rs2742357	2	179605705	0.0477137	A	G	-0.000658763	0.00109943	0.549049	1453231042	-0.599186	FALSE	0	0	0	0.00116434	1	0	0	FALSE	0.000388113	0
FHOD3	rs2644265	18	34230330	0.162028	A	G	-0.00102779	0.000653588	0.115825	1453231042	-1.57254	FALSE	0	0	0	0.0011587	1	0	0	FALSE	0.000386233	0
TTN-AS1_TTN	rs12476741	2	179755283	0.398608	A	G	-0.000283964	0.00048328	0.556817	1453231042	-0.587576	FALSE	0	0	0	0.00115635	1	0	0	FALSE	0.00038545	0
TTN-AS1_TTN	rs12468614	2	179785264	0.055666	C	G	-0.000550957	0.000937854	0.556891	1453231042	-0.587465	FALSE	0	0	0	0.00115627	1	0	0	FALSE	0.000385423	0
TTN-AS1_TTN	rs2562838	2	179579212	0.223658	T	C	-0.000336878	0.000576089	0.558704	1453231042	-0.584768	FALSE	0	0	0	0.00115445	1	0	0	FALSE	0.000384817	0
TTN-AS1_TTN	rs75210824	2	179609005	0.0477137	G	A	-0.000642172	0.00109941	0.559148	1453231042	-0.584108	FALSE	0	0	0	0.001154	1	0	0	FALSE	0.000384667	0
TTN-AS1_TTN	rs10183737	2	179747430	0.254473	T	C	-0.00031225	0.000535193	0.559601	1453231042	-0.583435	FALSE	0	0	0	0.00115355	1	0	0	FALSE	0.000384517	0
TTN-AS1_TTN	rs114412892	2	179796721	0.0924453	C	G	-0.000497978	0.000855045	0.560297	1453231042	-0.5824	FALSE	0	0	0	0.00115285	1	0	0	FALSE	0.000384283	0
TTN-AS1_TTN	rs16866551	2	179695965	0.145129	T	A	-0.000372238	0.000642379	0.562273	1453231042	-0.579468	FALSE	0	0	0	0.00115089	1	0	0	FALSE	0.00038363	0
TTN-AS1_TTN	rs2742344	2	179569400	0.0318091	C	T	0.00083073	0.00143614	0.562961	1453231042	0.578449	FALSE	0	0	0	0.00115021	1	0	0	FALSE	0.000383403	0
TTN-AS1_TTN	rs77690739	2	179666425	0.0497018	G	A	-0.0006375	0.0011051	0.564028	1453231042	-0.576869	FALSE	0	0	0	0.00114916	1	0	0	FALSE	0.000383053	0
TTN-AS1_TTN	rs3769860	2	179666246	0.0497018	T	A	-0.00063748	0.0011051	0.56404	1453231042	-0.576851	FALSE	0	0	0	0.00114915	1	0	0	FALSE	0.00038305	0
TTN-AS1_TTN	rs2627041	2	179601057	0.0506958	A	G	-0.000621002	0.00107949	0.565108	1453231042	-0.575271	FALSE	0	0	0	0.00114811	1	0	0	FALSE	0.000382703	0
TTN-AS1_TTN	rs72648917	2	179610009	0.0477137	T	G	-0.000631499	0.00109868	0.565442	1453231042	-0.574778	FALSE	0	0	0	0.00114778	1	0	0	FALSE	0.000382593	0
TTN-AS1_TTN	rs55863869	2	179647546	0.055666	A	G	-0.000606337	0.00105538	0.565615	1453231042	-0.574522	FALSE	0	0	0	0.00114761	1	0	0	FALSE	0.000382537	0
TTN-AS1_TTN	rs56120016	2	179609978	0.0477137	A	C	-0.000631133	0.00109878	0.5657	1453231042	-0.574395	FALSE	0	0	0	0.00114753	1	0	0	FALSE	0.00038251	0
TTN-AS1_TTN	rs66677602	2	179611711	0.0477137	C	A	-0.000630161	0.00109833	0.566139	1453231042	-0.573747	FALSE	0	0	0	0.0011471	1	0	0	FALSE	0.000382367	0
FHOD3	rs17651514	18	34176037	0.336978	G	A	0.000821265	0.000524739	0.117561	1453231042	1.56509	FALSE	0	0	0	0.00114523	1	0	0	FALSE	0.000381743	0
FHOD3	rs11661205	18	34106204	0.402584	G	T	-0.000790802	0.000505602	0.117799	1453231042	-1.56408	FALSE	0	0	0	0.00114342	1	0	0	FALSE	0.00038114	0
FHOD3	rs12969758	18	34082485	0.0894632	T	G	-0.00133658	0.00085466	0.117848	1453231042	-1.56387	FALSE	0	0	0	0.00114305	1	0	0	FALSE	0.000381017	0
TTN-AS1_TTN	rs77535462	2	179622805	0.0487078	A	G	-0.000621286	0.00109618	0.570869	1453231042	-0.566772	FALSE	0	0	0	0.00114255	1	0	0	FALSE	0.00038085	0
TTN-AS1_TTN	rs6707222	2	179743923	0.152087	C	T	-0.000381393	0.000672969	0.570897	1453231042	-0.566731	FALSE	0	0	0	0.00114252	1	0	0	FALSE	0.00038084	0
TTN-AS1_TTN	rs12615288	2	179679336	0.0626243	C	T	-0.000549874	0.000972716	0.571872	1453231042	-0.565297	FALSE	0	0	0	0.00114159	1	0	0	FALSE	0.00038053	0
TTN-AS1_TTN	rs16866497	2	179617370	0.0487078	T	C	-0.000618743	0.00109577	0.5723	1453231042	-0.564667	FALSE	0	0	0	0.00114119	1	0	0	FALSE	0.000380397	0
TTN-AS1_TTN	rs77903023	2	179660954	0.0497018	A	T	-0.00062347	0.00110483	0.572543	1453231042	-0.564311	FALSE	0	0	0	0.00114096	1	0	0	FALSE	0.00038032	0
FHOD3	rs491425	18	34263418	0.311133	A	G	-0.00083384	0.000535384	0.119361	1453231042	-1.55746	FALSE	0	0	0	0.00113167	1	0	0	FALSE	0.000377223	0
TTN-AS1_TTN	rs151041685	2	179725237	0.101392	G	T	-0.000444526	0.000809354	0.582844	1453231042	-0.549236	FALSE	0	0	0	0.00113142	1	0	0	FALSE	0.00037714	0
TTN-AS1_TTN	rs2742327	2	179587687	0.224652	T	C	-0.000315777	0.000575737	0.583366	1453231042	-0.548475	FALSE	0	0	0	0.00113095	1	0	0	FALSE	0.000376983	0
TTN-AS1_TTN	rs142524102	2	179706523	0.152087	C	A	0.000366631	0.000674744	0.58688	1453231042	0.543363	FALSE	0	0	0	0.0011278	1	0	0	FALSE	0.000375933	0
TTN-AS1_TTN	rs4894055	2	179714675	0.150099	C	T	-0.000363612	0.000673148	0.589082	1453231042	-0.540166	FALSE	0	0	0	0.00112585	1	0	0	FALSE	0.000375283	0
FHOD3	rs12955215	18	34083239	0.0894632	A	G	-0.00132328	0.000851481	0.120161	1453231042	-1.5541	FALSE	0	0	0	0.00112576	1	0	0	FALSE	0.000375253	0
TTN-AS1_TTN	rs6747791	2	179740009	0.409543	T	C	-0.00025331	0.000469976	0.589897	1453231042	-0.538986	FALSE	0	0	0	0.00112513	1	0	0	FALSE	0.000375043	0
FHOD3	rs12968974	18	34082729	0.0894632	A	C	-0.001326	0.000853641	0.12034	1453231042	-1.55335	FALSE	0	0	0	0.00112445	1	0	0	FALSE	0.000374817	0
TTN-AS1_TTN	rs142158088	2	179622850	0.0337972	C	T	-0.00079098	0.0014717	0.590951	1453231042	-0.537459	FALSE	0	0	0	0.0011242	1	0	0	FALSE	0.000374733	0
TTN-AS1_TTN	rs11684630	2	179792035	0.361829	C	G	-0.000259057	0.000482725	0.591505	1453231042	-0.536657	FALSE	0	0	0	0.00112372	1	0	0	FALSE	0.000374573	0
TTN-AS1_TTN	rs12185628	2	179680971	0.219682	T	C	0.000298333	0.000558294	0.59309	1453231042	0.534364	FALSE	0	0	0	0.00112234	1	0	0	FALSE	0.000374113	0
FHOD3	rs11664808	18	34106846	0.406561	T	C	-0.000784512	0.000505706	0.120825	1453231042	-1.55132	FALSE	0	0	0	0.00112092	1	0	0	FALSE	0.00037364	0
TTN-AS1_TTN	rs10930845	2	179797991	0.404573	T	C	-0.000248397	0.00047153	0.59834	1453231042	-0.526789	FALSE	0	0	0	0.00111784	1	0	0	FALSE	0.000372613	0
TTN-AS1_TTN	rs56345539	2	179727315	0.150099	A	C	0.000352	0.000672419	0.600638	1453231042	0.523483	FALSE	0	0	0	0.0011159	1	0	0	FALSE	0.000371967	0
TTN-AS1_TTN	rs17362588	2	179721046	0.101392	G	A	-0.000417817	0.00080836	0.605247	1453231042	-0.51687	FALSE	0	0	0	0.00111207	1	0	0	FALSE	0.00037069	0
TTN-AS1_TTN	rs10185678	2	179732050	0.333002	C	T	-0.000250733	0.000486297	0.606136	1453231042	-0.515597	FALSE	0	0	0	0.00111134	1	0	0	FALSE	0.000370447	0
FHOD3	rs58234590	18	34074074	0.0765408	T	C	-0.00145412	0.000940858	0.122218	1453231042	-1.54553	FALSE	0	0	0	0.00111091	1	0	0	FALSE	0.000370303	0
FHOD3	rs7242523	18	34090960	0.457256	A	G	-0.000777574	0.000503136	0.122236	1453231042	-1.54545	FALSE	0	0	0	0.00111078	1	0	0	FALSE	0.00037026	0
TTN-AS1_TTN	rs4637162	2	179736012	0.152087	T	C	0.000336612	0.000671284	0.616058	1453231042	0.501445	FALSE	0	0	0	0.00110337	1	0	0	FALSE	0.00036779	0
TTN-AS1_TTN	rs10171173	2	179794447	0.400596	A	G	-0.00023609	0.000471178	0.616327	1453231042	-0.501063	FALSE	0	0	0	0.00110316	1	0	0	FALSE	0.00036772	0
CLCNKA	rs6604909	1	16371932	0.06163	A	C	-0.00530435	0.00421314	0.20803	1453231042	-1.259	FALSE	0	0.00147026	0	0		0	0	FALSE	0.000367564	0	0
TTN-AS1_TTN	rs10803920	2	179728163	0.150099	A	G	-0.000332551	0.000671339	0.62035	1453231042	-0.495354	FALSE	0	0	0	0.00110002	1	0	0	FALSE	0.000366673	0
TTN-AS1_TTN	rs72953397	2	179568708	0.0497018	G	A	-0.000647477	0.00132336	0.624651	1453231042	-0.489269	FALSE	0	0	0	0.00109673	1	0	0	FALSE	0.000365577	0
TTN-AS1_TTN	rs11895246	2	179788473	0.0596421	C	G	-0.000457278	0.00093704	0.625548	1453231042	-0.488003	FALSE	0	0	0	0.00109606	1	0	0	FALSE	0.000365353	0
TTN-AS1_TTN	rs10497526	2	179684839	0.182903	C	T	0.000285143	0.000591732	0.629893	1453231042	0.481878	FALSE	0	0	0	0.0010928	1	0	0	FALSE	0.000364267	0
TTN-AS1_TTN	rs1905520	2	179636983	0.0377734	C	T	0.00308303	0.00649963	0.635258	1453231042	0.474339	FALSE	0	0	0	0.00108887	1	0	0	FALSE	0.000362957	0
TTN-AS1_TTN	rs4894057	2	179735372	0.151093	C	T	-0.000316559	0.000670537	0.636857	1453231042	-0.472097	FALSE	0	0	0	0.00108772	1	0	0	FALSE	0.000362573	0
TTN-AS1_TTN	rs1489486	2	179684983	0.182903	A	G	-0.000275115	0.000591102	0.641626	1453231042	-0.465427	FALSE	0	0	0	0.00108432	1	0	0	FALSE	0.00036144	0
TTN-AS1_TTN	rs10169992	2	179789559	0.400596	A	G	-0.000220733	0.000474316	0.641666	1453231042	-0.465371	FALSE	0	0	0	0.00108429	1	0	0	FALSE	0.00036143	0
TTN-AS1_TTN	rs6433738	2	179710706	0.152087	A	G	-0.000311392	0.000672263	0.643221	1453231042	-0.4632	FALSE	0	0	0	0.0010832	1	0	0	FALSE	0.000361067	0
TTN-AS1_TTN	rs2627043	2	179582537	0.224652	G	T	-0.000265242	0.000573592	0.643778	1453231042	-0.462422	FALSE	0	0	0	0.00108281	1	0	0	FALSE	0.000360937	0
TTN-AS1_TTN	rs2291313	2	179632710	0.223658	T	C	0.000262985	0.000576134	0.648056	1453231042	0.456465	FALSE	0	0	0	0.00107985	1	0	0	FALSE	0.00035995	0
TTN-AS1_TTN	rs2742347	2	179600648	0.0516899	C	T	-0.000484984	0.00106685	0.649403	1453231042	-0.454592	FALSE	0	0	0	0.00107893	1	0	0	FALSE	0.000359643	0
TTN-AS1_TTN	rs3769863	2	179649750	0.491054	C	A	-0.000209969	0.000462543	0.649868	1453231042	-0.453945	FALSE	0	0	0	0.00107861	1	0	0	FALSE	0.000359537	0
TTN-AS1_TTN	rs2029395	2	179680221	0.125249	T	C	-0.00032327	0.000714176	0.650803	1453231042	-0.452647	FALSE	0	0	0	0.00107798	1	0	0	FALSE	0.000359327	0
FHOD3	rs12955359	18	34083396	0.0894632	A	C	-0.00129674	0.000850686	0.127421	1453231042	-1.52435	FALSE	0	0	0	0.00107538	1	0	0	FALSE	0.00035846	0
TTN-AS1_TTN	rs7573700	2	179712737	0.154076	C	T	-0.000297267	0.000665403	0.655058	1453231042	-0.446747	FALSE	0	0	0	0.00107512	1	0	0	FALSE	0.000358373	0
TTN-AS1_TTN	rs2742331	2	179576596	0.223658	A	T	-0.000254383	0.000573222	0.657204	1453231042	-0.443777	FALSE	0	0	0	0.0010737	1	0	0	FALSE	0.0003579	0
FHOD3	rs74506275	18	34074415	0.0775348	A	G	-0.00143679	0.00094364	0.127858	1453231042	-1.5226	FALSE	0	0	0	0.00107252	1	0	0	FALSE	0.000357507	0
TTN-AS1_TTN	rs7423101	2	179652439	0.0964215	T	C	0.00164039	0.00371921	0.659169	1453231042	0.44106	FALSE	0	0	0	0.00107241	1	0	0	FALSE	0.00035747	0
TTN-AS1_TTN	rs2562839	2	179578730	0.223658	G	A	-0.000251784	0.000573096	0.660416	1453231042	-0.43934	FALSE	0	0	0	0.0010716	1	0	0	FALSE	0.0003572	0
TTN-AS1_TTN	rs13417557	2	179682625	0.0755467	A	G	-0.000381771	0.000869036	0.660442	1453231042	-0.439304	FALSE	0	0	0	0.00107158	1	0	0	FALSE	0.000357193	0
TTN-AS1_TTN	rs11888217	2	179593352	0.0357853	C	T	0.00271436	0.00621117	0.662103	1453231042	0.437012	FALSE	0	0	0	0.00107051	1	0	0	FALSE	0.000356837	0
TTN-AS1_TTN	rs4471922	2	179633298	0.223658	G	T	0.000247194	0.000575551	0.667566	1453231042	0.42949	FALSE	0	0	0	0.00106703	1	0	0	FALSE	0.000355677	0
TTN-AS1_TTN	rs12619308	2	179729270	0.054672	G	T	-0.000408888	0.00095445	0.668359	1453231042	-0.428401	FALSE	0	0	0	0.00106653	1	0	0	FALSE	0.00035551	0
TTN-AS1_TTN	rs78536595	2	179686246	0.0387674	C	T	0.000562131	0.00131339	0.668651	1453231042	0.428001	FALSE	0	0	0	0.00106634	1	0	0	FALSE	0.000355447	0
TTN-AS1_TTN	rs2562836	2	179579822	0.223658	T	A	-0.000244546	0.000572881	0.669473	1453231042	-0.426872	FALSE	0	0	0	0.00106583	1	0	0	FALSE	0.000355277	0
TTN-AS1_TTN	rs3813240	2	179610172	0.0337972	T	A	-0.000676576	0.00160751	0.67384	1453231042	-0.420884	FALSE	0	0	0	0.00106313	1	0	0	FALSE	0.000354377	0
TTN-AS1_TTN	rs10179811	2	179572108	0.0357853	A	G	0.00262463	0.00623705	0.673892	1453231042	0.420813	FALSE	0	0	0	0.0010631	1	0	0	FALSE	0.000354367	0
TTN-AS1_TTN	rs12990752	2	179719080	0.299205	T	C	0.000885481	0.00214246	0.679386	1453231042	0.413301	FALSE	0	0	0	0.00105977	1	0	0	FALSE	0.000353257	0
TTN-AS1_TTN	rs13033688	2	179718133	0.0735586	T	A	0.00037302	0.000919623	0.685019	1453231042	0.405623	FALSE	0	0	0	0.00105645	1	0	0	FALSE	0.00035215	0
TTN-AS1_TTN	rs7601902	2	179765908	0.379722	G	A	-0.000480648	0.00122428	0.694618	1453231042	-0.392596	FALSE	0	0	0	0.00105097	1	0	0	FALSE	0.000350323	0
TTN-AS1_TTN	rs7570928	2	179712600	0.154076	C	T	-0.000245732	0.000666182	0.712227	1453231042	-0.368867	FALSE	0	0	0	0.00104151	1	0	0	FALSE	0.00034717	0
TTN-AS1_TTN	rs10178003	2	179684466	0.124254	C	A	-0.000260017	0.00071367	0.715605	1453231042	-0.364338	FALSE	0	0	0	0.00103979	1	0	0	FALSE	0.000346597	0
TTN-AS1_TTN	rs4894054	2	179713601	0.234592	C	A	-0.000198854	0.000551475	0.71841	1453231042	-0.360585	FALSE	0	0	0	0.00103837	1	0	0	FALSE	0.000346123	0
TTN-AS1_TTN	rs1484116	2	179618462	0.223658	C	T	0.000202596	0.000572304	0.723338	1453231042	0.354001	FALSE	0	0	0	0.00103593	1	0	0	FALSE	0.00034531	0
FHOD3	rs112712036	18	34176408	0.356859	A	C	0.00077824	0.000518998	0.133743	1453231042	1.49951	FALSE	0	0	0	0.00103573	1	0	0	FALSE	0.000345243	0
FHOD3	rs10468925	18	34006012	0.27336	C	T	0.000870512	0.000581351	0.13429	1453231042	1.4974	FALSE	0	0	0	0.00103246	1	0	0	FALSE	0.000344153	0
TTN-AS1_TTN	rs62177297	2	179751771	0.154076	G	A	-0.000220294	0.000642058	0.731519	1453231042	-0.343106	FALSE	0	0	0	0.00103201	1	0	0	FALSE	0.000344003	0
TTN-AS1_TTN	rs79149825	2	179696532	0.0308151	T	A	-0.000453112	0.00133788	0.734851	1453231042	-0.338679	FALSE	0	0	0	0.00103045	1	0	0	FALSE	0.000343483	0
TTN-AS1_TTN	rs7591091	2	179754194	0.327038	T	C	-0.000169675	0.000502953	0.735848	1453231042	-0.337357	FALSE	0	0	0	0.00102999	1	0	0	FALSE	0.00034333	0
TTN-AS1_TTN	rs35828982	2	179740468	0.0367793	C	T	-0.000432267	0.00129241	0.738028	1453231042	-0.334466	FALSE	0	0	0	0.00102899	1	0	0	FALSE	0.000342997	0
TTN-AS1_TTN	rs6748215	2	179747078	0.299205	A	G	-0.000168962	0.000508717	0.739789	1453231042	-0.332133	FALSE	0	0	0	0.00102819	1	0	0	FALSE	0.00034273	0
TTN-AS1_TTN	rs56791846	2	179745089	0.153082	G	T	-0.000210222	0.000638049	0.741795	1453231042	-0.329477	FALSE	0	0	0	0.00102729	1	0	0	FALSE	0.00034243	0
TTN-AS1_TTN	rs12693170	2	179737144	0.319085	C	A	0.000162644	0.000496966	0.74346	1453231042	0.327274	FALSE	0	0	0	0.00102654	1	0	0	FALSE	0.00034218	0
FHOD3	rs71366395	18	34127919	0.142147	G	C	0.00119641	0.000801506	0.135515	1453231042	1.4927	FALSE	0	0	0	0.00102525	1	0	0	FALSE	0.00034175	0
TTN-AS1_TTN	rs78581088	2	179792897	0.0586481	T	C	-0.000273816	0.000920309	0.766065	1453231042	-0.297526	FALSE	0	0	0	0.00101705	1	0	0	FALSE	0.000339017	0
TTN-AS1_TTN	rs72957367	2	179704704	0.0347913	C	T	-0.000384551	0.00132844	0.772217	1453231042	-0.289477	FALSE	0	0	0	0.00101465	1	0	0	FALSE	0.000338217	0
TTN-AS1_TTN	rs2244492	2	179554305	0.382704	C	T	-0.00013377	0.000474511	0.778011	1453231042	-0.281912	FALSE	0	0	0	0.00101246	1	0	0	FALSE	0.000337487	0
TTN-AS1_TTN	rs79724489	2	179729183	0.0328032	C	T	-0.000368076	0.00131069	0.778844	1453231042	-0.280826	FALSE	0	0	0	0.00101215	1	0	0	FALSE	0.000337383	0
TTN-AS1_TTN	rs10930838	2	179725134	0.0367793	C	G	0.000368863	0.00134821	0.784396	1453231042	0.273595	FALSE	0	0	0	0.00101012	1	0	0	FALSE	0.000336707	0
TTN-AS1_TTN	rs12468141	2	179706977	0.0894632	A	G	0.000214681	0.000807169	0.790264	1453231042	0.265968	FALSE	0	0	0	0.00100805	1	0	0	FALSE	0.000336017	0
TTN-AS1_TTN	rs55913885	2	179708488	0.0894632	C	T	0.000209603	0.000800634	0.793479	1453231042	0.261796	FALSE	0	0	0	0.00100694	1	0	0	FALSE	0.000335647	0
FHOD3	rs644056	18	34270525	0.301193	C	G	-0.000783182	0.000529213	0.1389	1453231042	-1.4799	FALSE	0	0	0	0.00100592	1	0	0	FALSE	0.000335307	0
TTN-AS1_TTN	rs79107654	2	179707546	0.0894632	G	A	0.000204231	0.000806926	0.800192	1453231042	0.253098	FALSE	0	0	0	0.00100468	1	0	0	FALSE	0.000334893	0
TTN-AS1_TTN	rs10445768	2	179749389	0.0666004	G	A	-0.000235937	0.000935689	0.800923	1453231042	-0.252153	FALSE	0	0	0	0.00100444	1	0	0	FALSE	0.000334813	0
TTN-AS1_TTN	rs13006707	2	179747907	0.0666004	C	T	-0.000233578	0.000933103	0.802337	1453231042	-0.250324	FALSE	0	0	0	0.00100398	1	0	0	FALSE	0.00033466	0
TTN-AS1_TTN	rs13013677	2	179748641	0.0666004	G	A	-0.000231457	0.000935867	0.804662	1453231042	-0.247318	FALSE	0	0	0	0.00100323	1	0	0	FALSE	0.00033441	0
TTN-AS1_TTN	rs12476203	2	179703487	0.0894632	T	A	0.000199472	0.000806823	0.804729	1453231042	0.247231	FALSE	0	0	0	0.00100321	1	0	0	FALSE	0.000334403	0
TTN-AS1_TTN	rs34817160	2	179749257	0.0675944	G	C	-0.000230918	0.000935821	0.805098	1453231042	-0.246755	FALSE	0	0	0	0.00100309	1	0	0	FALSE	0.000334363	0
TTN-AS1_TTN	rs10497520	2	179644855	0.143141	T	C	0.000162827	0.000671859	0.808506	1453231042	0.242353	FALSE	0	0	0	0.00100201	1	0	0	FALSE	0.000334003	0
TTN-AS1_TTN	rs1844334	2	179681330	0.343936	T	C	-0.000115377	0.000486787	0.812643	1453231042	-0.237017	FALSE	0	0	0	0.00100073	1	0	0	FALSE	0.000333577	0
FHOD3	rs7245226	18	34091842	0.413519	T	G	-0.00211779	0.00143469	0.13991	1453231042	-1.47612	FALSE	0	0	0	0.00100032	1	0	0	FALSE	0.00033344	0
TTN-AS1_TTN	rs12992014	2	179691285	0.417495	G	A	-0.000474238	0.00201787	0.814194	1453231042	-0.235019	FALSE	0	0	0	0.00100026	1	0	0	FALSE	0.00033342	0
TTN-AS1_TTN	rs7573293	2	179753245	0.280318	C	T	0.00012093	0.000523198	0.817208	1453231042	0.231137	FALSE	0	0	0	0.000999357	1	0	0	FALSE	0.000333119	0
TTN-AS1_TTN	rs1489483	2	179688455	0.199801	C	T	-0.000132101	0.000577207	0.818975	1453231042	-0.228863	FALSE	0	0	0	0.000998834	1	0	0	FALSE	0.000332945	0
TTN-AS1_TTN	rs12993099	2	179598228	0.0894632	A	G	-0.000194648	0.000886594	0.826225	1453231042	-0.219546	FALSE	0	0	0	0.00099675	1	0	0	FALSE	0.00033225	0
TTN-AS1_TTN	rs6731864	2	179736006	0.445328	T	G	9.91076e-05	0.000461884	0.830101	1453231042	0.214572	FALSE	0	0	0	0.000995674	1	0	0	FALSE	0.000331891	0
TTN-AS1_TTN	rs17453396	2	179710000	0.0894632	A	G	0.000171727	0.000803431	0.830748	1453231042	0.213742	FALSE	0	0	0	0.000995497	1	0	0	FALSE	0.000331832	0
TTN-AS1_TTN	rs66521408	2	179566051	0.0974155	C	T	0.000172884	0.000827318	0.834472	1453231042	0.20897	FALSE	0	0	0	0.000994494	1	0	0	FALSE	0.000331498	0
TTN-AS1_TTN	rs80188693	2	179793139	0.0586481	T	G	-0.000188769	0.00092031	0.837483	1453231042	-0.205114	FALSE	0	0	0	0.0009937	1	0	0	FALSE	0.000331233	0
TTN-AS1_TTN	rs79901894	2	179794950	0.0586481	A	G	-0.000187451	0.000919625	0.838483	1453231042	-0.203835	FALSE	0	0	0	0.00099344	1	0	0	FALSE	0.000331147	0
TTN-AS1_TTN	rs77206429	2	179792156	0.0586481	G	A	-0.000178147	0.000923081	0.846965	1453231042	-0.192992	FALSE	0	0	0	0.000991305	1	0	0	FALSE	0.000330435	0
TTN-AS1_TTN	rs79840855	2	179802603	0.0586481	T	C	-0.000174773	0.000919848	0.849308	1453231042	-0.190002	FALSE	0	0	0	0.000990738	1	0	0	FALSE	0.000330246	0
TTN-AS1_TTN	rs112864859	2	179800202	0.0586481	T	C	-0.000172641	0.000919583	0.851082	1453231042	-0.187738	FALSE	0	0	0	0.000990314	1	0	0	FALSE	0.000330105	0
TTN-AS1_TTN	rs12465459	2	179672711	0.341948	T	C	-9.12765e-05	0.000486646	0.85122	1453231042	-0.187562	FALSE	0	0	0	0.000990282	1	0	0	FALSE	0.000330094	0
TTN-AS1_TTN	rs17453403	2	179710550	0.0894632	C	G	0.000149919	0.000805593	0.852368	1453231042	0.186098	FALSE	0	0	0	0.000990011	1	0	0	FALSE	0.000330004	0
TTN-AS1_TTN	rs1873164	2	179753549	0.212724	G	A	0.000103074	0.000574677	0.857655	1453231042	0.17936	FALSE	0	0	0	0.000988793	1	0	0	FALSE	0.000329598	0
TTN-AS1_TTN	rs13426573	2	179758963	0.0924453	T	G	-0.000138161	0.000818196	0.865907	1453231042	-0.16886	FALSE	0	0	0	0.000986987	1	0	0	FALSE	0.000328996	0
TTN-AS1_TTN	rs75205139	2	179803953	0.0586481	A	T	-0.000142237	0.000919717	0.877095	1453231042	-0.154653	FALSE	0	0	0	0.000984721	1	0	0	FALSE	0.00032824	0
TTN-AS1_TTN	rs7559166	2	179628369	0.171968	G	T	9.29294e-05	0.000637987	0.884189	1453231042	0.14566	FALSE	0	0	0	0.000983392	1	0	0	FALSE	0.000327797	0
TTN-AS1_TTN	rs2220127	2	179711376	0.083499	T	C	0.000119638	0.000885323	0.892505	1453231042	0.135135	FALSE	0	0	0	0.00098194	1	0	0	FALSE	0.000327313	0
TTN-AS1_TTN	rs74541823	2	179807667	0.0775348	G	A	-0.000113634	0.000863233	0.89527	1453231042	-0.131638	FALSE	0	0	0	0.000981482	1	0	0	FALSE	0.000327161	0
TTN-AS1_TTN	rs2627044	2	179579366	0.0318091	G	A	0.000834456	0.00636307	0.895664	1453231042	0.13114	FALSE	0	0	0	0.000981418	1	0	0	FALSE	0.000327139	0
TTN-AS1_TTN	rs76437738	2	179799273	0.0576541	A	G	-0.000117231	0.000902345	0.896631	1453231042	-0.129918	FALSE	0	0	0	0.000981262	1	0	0	FALSE	0.000327087	0
TTN-AS1_TTN	rs2742332	2	179574384	0.0318091	C	T	0.000746336	0.00637783	0.906844	1453231042	0.11702	FALSE	0	0	0	0.0009797	1	0	0	FALSE	0.000326567	0
TTN-AS1_TTN	rs12988301	2	179732845	0.0705765	G	A	-0.000107963	0.000933949	0.907971	1453231042	-0.115598	FALSE	0	0	0	0.000979538	1	0	0	FALSE	0.000326513	0
TTN-AS1_TTN	rs10179812	2	179775893	0.0924453	T	G	-9.25962e-05	0.000815424	0.90959	1453231042	-0.113556	FALSE	0	0	0	0.000979309	1	0	0	FALSE	0.000326436	0
TTN-AS1_TTN	rs10497527	2	179698596	0.0964215	G	A	8.98068e-05	0.000794291	0.909979	1453231042	0.113065	FALSE	0	0	0	0.000979255	1	0	0	FALSE	0.000326418	0
FHOD3	rs671303	18	34269028	0.317097	C	T	-0.000769527	0.000526605	0.143933	1453231042	-1.4613	FALSE	0	0	0	0.000978777	1	0	0	FALSE	0.000326259	0
TTN-AS1_TTN	rs11893004	2	179731655	0.441352	G	A	4.94052e-05	0.00046301	0.915024	1453231042	0.106704	FALSE	0	0	0	0.00097857	1	0	0	FALSE	0.00032619	0
TTN-AS1_TTN	rs59532220	2	179649461	0.0924453	G	A	-8.85403e-05	0.000835322	0.915586	1453231042	-0.105995	FALSE	0	0	0	0.000978497	1	0	0	FALSE	0.000326166	0
TTN-AS1_TTN	rs35759895	2	179736574	0.0705765	A	G	-9.47108e-05	0.000934313	0.919257	1453231042	-0.10137	FALSE	0	0	0	0.000978027	1	0	0	FALSE	0.000326009	0
TTN-AS1_TTN	rs13014078	2	179771858	0.379722	C	T	4.71593e-05	0.0004708	0.92021	1453231042	0.100169	FALSE	0	0	0	0.000977909	1	0	0	FALSE	0.00032597	0
TTN-AS1_TTN	rs12477340	2	179728644	0.0805169	T	C	7.96281e-05	0.000801645	0.920876	1453231042	0.0993308	FALSE	0	0	0	0.000977827	1	0	0	FALSE	0.000325942	0
FHOD3	rs12961765	18	34121138	0.102386	C	T	0.0049058	0.00336201	0.144514	1453231042	1.45919	FALSE	0	0	0	0.000975762	1	0	0	FALSE	0.000325254	0
FHOD3	rs12607135	18	34084319	0.0894632	C	T	-0.00122173	0.000840432	0.14603	1453231042	-1.4537	FALSE	0	0	0	0.000967993	1	0	0	FALSE	0.000322664	0
FHOD3	rs8182443	18	34061193	0.112326	T	G	0.00112805	0.000777093	0.146604	1453231042	1.45163	FALSE	0	0	0	0.000965095	1	0	0	FALSE	0.000321698	0
FHOD3	rs627756	18	34265279	0.319085	G	A	-0.000750376	0.000525055	0.152964	1453231042	-1.42914	FALSE	0	0	0	0.000934326	1	0	0	FALSE	0.000311442	0
FHOD3	rs72897513	18	34244710	0.0616302	T	G	-0.00155843	0.00109748	0.155606	1453231042	-1.42	FALSE	0	0	0	0.000922247	1	0	0	FALSE	0.000307416	0
FHOD3	rs1398955	18	34010680	0.235586	G	A	0.000872464	0.000618397	0.15829	1453231042	1.41085	FALSE	0	0	0	0.000910371	1	0	0	FALSE	0.000303457	0
FHOD3	rs12965996	18	34016701	0.462227	G	A	0.000708342	0.000502997	0.159059	1453231042	1.40824	FALSE	0	0	0	0.000907034	1	0	0	FALSE	0.000302345	0
FHOD3	rs2047272	18	34182938	0.370775	A	G	0.000732347	0.000524256	0.162436	1453231042	1.39693	FALSE	0	0	0	0.000892752	1	0	0	FALSE	0.000297584	0
FHOD3	rs500559	18	34270194	0.308151	A	G	-0.000731931	0.000524068	0.162524	1453231042	-1.39663	FALSE	0	0	0	0.000892384	1	0	0	FALSE	0.000297461	0
FHOD3	rs8087763	18	34174958	0.323062	T	C	-0.000737807	0.000529486	0.163487	1453231042	-1.39344	FALSE	0	0	0	0.000888419	1	0	0	FALSE	0.00029614	0
FHOD3	rs17747602	18	34212669	0.162028	C	T	0.000911032	0.000656188	0.165025	1453231042	1.38837	FALSE	0	0	0	0.000882175	1	0	0	FALSE	0.000294058	0
FHOD3	rs502154	18	34270316	0.309145	A	G	-0.000727879	0.000524655	0.165335	1453231042	-1.38735	FALSE	0	0	0	0.000880928	1	0	0	FALSE	0.000293643	0
FHOD3	rs117800306	18	34121456	0.0596421	T	G	-0.00160268	0.00119092	0.178384	1453231042	-1.34575	FALSE	0	0	0	0.000832243	1	0	0	FALSE	0.000277414	0
FHOD3	rs17651330	18	34142837	0.0298211	G	A	-0.00213781	0.00159961	0.1814	1453231042	-1.33646	FALSE	0	0	0	0.000821939	1	0	0	FALSE	0.00027398	0
FHOD3	rs2090036	18	34021028	0.442346	T	G	0.000646603	0.000491445	0.188268	1453231042	1.31572	FALSE	0	0	0	0.000799643	1	0	0	FALSE	0.000266548	0
FHOD3	rs113014276	18	34112047	0.027833	G	A	0.00182832	0.00139859	0.191124	1453231042	1.30726	FALSE	0	0	0	0.000790823	1	0	0	FALSE	0.000263608	0
FHOD3	rs4799869	18	34162810	0.333002	C	T	0.000662915	0.000508274	0.192149	1453231042	1.30425	FALSE	0	0	0	0.000787716	1	0	0	FALSE	0.000262572	0
FHOD3	rs12970933	18	34114180	0.177932	A	G	-0.000807974	0.000624479	0.195722	1453231042	-1.29384	FALSE	0	0	0	0.000777135	1	0	0	FALSE	0.000259045	0
FHOD3	rs11878080	18	34056036	0.111332	G	A	0.000971154	0.000751504	0.19626	1453231042	1.29228	FALSE	0	0	0	0.000775572	1	0	0	FALSE	0.000258524	0
FHOD3	rs4799870	18	34164941	0.341948	C	G	0.000652161	0.000506144	0.197575	1453231042	1.28849	FALSE	0	0	0	0.000771789	1	0	0	FALSE	0.000257263	0
FHOD3	rs4799432	18	34315042	0.294235	C	T	0.000670486	0.000522928	0.199781	1453231042	1.28218	FALSE	0	0	0	0.000765551	1	0	0	FALSE	0.000255184	0
FHOD3	rs79512559	18	34159946	0.0974155	T	C	0.00466218	0.00365874	0.202572	1453231042	1.27426	FALSE	0	0	0	0.000757841	1	0	0	FALSE	0.000252614	0
FHOD3	rs59051454	18	34205415	0.158052	T	C	-0.00350064	0.00274738	0.202601	1453231042	-1.27418	FALSE	0	0	0	0.000757763	1	0	0	FALSE	0.000252588	0
FHOD3	rs142995879	18	34219418	0.0407555	G	T	0.0068172	0.00535771	0.203228	1453231042	1.27241	FALSE	0	0	0	0.000756059	1	0	0	FALSE	0.00025202	0
FHOD3	rs77000653	18	34238979	0.12326	A	G	-0.00100983	0.000796643	0.204939	1453231042	-1.26761	FALSE	0	0	0	0.00075146	1	0	0	FALSE	0.000250487	0
FHOD3	rs591873	18	34256214	0.271372	A	G	-0.000678419	0.000536222	0.205806	1453231042	-1.26518	FALSE	0	0	0	0.000749159	1	0	0	FALSE	0.00024972	0
FHOD3	rs4346268	18	34316204	0.296223	C	A	0.000654176	0.000522769	0.2108	1453231042	1.25137	FALSE	0	0	0	0.000736249	1	0	0	FALSE	0.000245416	0
FHOD3	rs2848904	18	34233530	0.483101	T	C	-0.00245784	0.00197911	0.214277	1453231042	-1.24189	FALSE	0	0	0	0.000727601	1	0	0	FALSE	0.000242534	0
FHOD3	rs61735994	18	34289142	0.0367793	A	G	-0.00188859	0.00152113	0.214395	1453231042	-1.24157	FALSE	0	0	0	0.000727313	1	0	0	FALSE	0.000242438	0
FHOD3	rs873201	18	34315475	0.296223	C	T	0.000648528	0.000522354	0.214403	1453231042	1.24155	FALSE	0	0	0	0.000727292	1	0	0	FALSE	0.000242431	0
FHOD3	rs561021	18	34278799	0.318091	T	C	-0.000629394	0.000507027	0.214479	1453231042	-1.24134	FALSE	0	0	0	0.000727107	1	0	0	FALSE	0.000242369	0
FHOD3	rs7241971	18	34029171	0.0974155	C	T	0.000968174	0.000780771	0.214967	1453231042	1.24002	FALSE	0	0	0	0.000725917	1	0	0	FALSE	0.000241972	0
FHOD3	rs12608384	18	34025945	0.143141	G	A	0.000797786	0.00064469	0.215912	1453231042	1.23747	FALSE	0	0	0	0.000723626	1	0	0	FALSE	0.000241209	0
FHOD3	rs76169785	18	34045085	0.0666004	G	A	0.00114077	0.000925072	0.217514	1453231042	1.23317	FALSE	0	0	0	0.000719788	1	0	0	FALSE	0.000239929	0
FHOD3	rs72891780	18	34067724	0.084493	T	A	0.00122918	0.000996944	0.217595	1453231042	1.23295	FALSE	0	0	0	0.000719593	1	0	0	FALSE	0.000239864	0
FHOD3	rs11875608	18	34192586	0.181909	T	C	-0.000815489	0.000661636	0.21775	1453231042	-1.23253	FALSE	0	0	0	0.000719227	1	0	0	FALSE	0.000239742	0
FHOD3	rs12604388	18	34315711	0.296223	C	T	0.000641942	0.000521949	0.218737	1453231042	1.22989	FALSE	0	0	0	0.000716893	1	0	0	FALSE	0.000238964	0
FHOD3	rs17746694	18	34028357	0.137177	G	T	0.000798198	0.000649178	0.218865	1453231042	1.22955	FALSE	0	0	0	0.000716592	1	0	0	FALSE	0.000238864	0
FHOD3	rs4799885	18	34313674	0.296223	C	T	0.000640614	0.000521395	0.219201	1453231042	1.22865	FALSE	0	0	0	0.000715802	1	0	0	FALSE	0.000238601	0
FHOD3	rs8089337	18	34316100	0.296223	G	A	0.000640293	0.000521414	0.219449	1453231042	1.22799	FALSE	0	0	0	0.000715222	1	0	0	FALSE	0.000238407	0
FHOD3	rs7243111	18	34029119	0.0974155	T	C	0.00095528	0.000779121	0.220161	1453231042	1.2261	FALSE	0	0	0	0.000713561	1	0	0	FALSE	0.000237854	0
FHOD3	rs62082326	18	34107547	0.0656064	T	G	0.00107687	0.000879319	0.220702	1453231042	1.22466	FALSE	0	0	0	0.000712306	1	0	0	FALSE	0.000237435	0
FHOD3	rs9959091	18	34319676	0.296223	C	T	0.000633434	0.000520702	0.223795	1453231042	1.2165	FALSE	0	0	0	0.000705243	1	0	0	FALSE	0.000235081	0
FHOD3	rs12607992	18	34020394	0.0924453	C	T	0.000955046	0.000786492	0.224629	1453231042	1.21431	FALSE	0	0	0	0.00070337	1	0	0	FALSE	0.000234457	0
FHOD3	rs56865957	18	34058459	0.0795229	A	G	-0.00115139	0.000948189	0.224632	1453231042	-1.2143	FALSE	0	0	0	0.000703362	1	0	0	FALSE	0.000234454	0
FHOD3	rs4799887	18	34319157	0.294235	C	T	0.000632599	0.000521087	0.224748	1453231042	1.214	FALSE	0	0	0	0.000703103	1	0	0	FALSE	0.000234368	0
FHOD3	rs6507176	18	34183237	0.129225	T	G	-0.000862386	0.000710754	0.225	1453231042	-1.21334	FALSE	0	0	0	0.000702541	1	0	0	FALSE	0.00023418	0
FHOD3	rs2860948	18	34027096	0.149105	A	G	0.000774113	0.000638572	0.225414	1453231042	1.21226	FALSE	0	0	0	0.000701618	1	0	0	FALSE	0.000233873	0
FHOD3	rs4799871	18	34168491	0.337972	A	G	0.000608922	0.000502509	0.225602	1453231042	1.21176	FALSE	0	0	0	0.0007012	1	0	0	FALSE	0.000233733	0
FHOD3	rs79521732	18	34201869	0.0308151	C	T	0.00184446	0.00152394	0.226155	1453231042	1.21032	FALSE	0	0	0	0.000699978	1	0	0	FALSE	0.000233326	0
FHOD3	rs9956637	18	34130416	0.167992	G	T	0.000788093	0.000651806	0.226628	1453231042	1.20909	FALSE	0	0	0	0.000698935	1	0	0	FALSE	0.000232978	0
FHOD3	rs4799872	18	34171514	0.358847	C	T	0.000596819	0.000497128	0.229932	1453231042	1.20053	FALSE	0	0	0	0.000691766	1	0	0	FALSE	0.000230589	0
FHOD3	rs1790649	18	34005693	0.49503	A	G	0.000592752	0.000494189	0.230356	1453231042	1.19944	FALSE	0	0	0	0.000690861	1	0	0	FALSE	0.000230287	0
FHOD3	rs8084724	18	34023106	0.150099	A	C	0.000766629	0.000639929	0.230921	1453231042	1.19799	FALSE	0	0	0	0.000689659	1	0	0	FALSE	0.000229886	0
FHOD3	rs7229111	18	34178483	0.365805	G	A	0.000593727	0.000498288	0.233445	1453231042	1.19153	FALSE	0	0	0	0.000684358	1	0	0	FALSE	0.000228119	0
FHOD3	rs4799875	18	34185526	0.127237	C	T	0.000896284	0.000757489	0.236718	1453231042	1.18323	FALSE	0	0	0	0.000677646	1	0	0	FALSE	0.000225882	0
FHOD3	rs62083972	18	34173417	0.026839	C	T	0.0015536	0.00131385	0.237013	1453231042	1.18248	FALSE	0	0	0	0.000677048	1	0	0	FALSE	0.000225683	0
FHOD3	rs17651103	18	34103692	0.0347913	G	A	0.00165273	0.00140072	0.238033	1453231042	1.17992	FALSE	0	0	0	0.000674997	1	0	0	FALSE	0.000224999	0
FHOD3	rs75743013	18	34062980	0.0815109	T	G	-0.00104263	0.000884122	0.238286	1453231042	-1.17928	FALSE	0	0	0	0.000674492	1	0	0	FALSE	0.000224831	0
FHOD3	rs17673874	18	34062920	0.0815109	G	A	-0.0010424	0.000884063	0.238357	1453231042	-1.1791	FALSE	0	0	0	0.00067435	1	0	0	FALSE	0.000224783	0
FHOD3	rs6507171	18	34028304	0.147117	G	A	0.000752403	0.000640136	0.239843	1453231042	1.17538	FALSE	0	0	0	0.0006714	1	0	0	FALSE	0.0002238	0
FHOD3	rs4799886	18	34318747	0.304175	G	C	0.000605115	0.000515811	0.240743	1453231042	1.17313	FALSE	0	0	0	0.000669631	1	0	0	FALSE	0.00022321	0
FHOD3	rs4799880	18	34281409	0.319085	G	A	0.000590189	0.000504568	0.242125	1453231042	1.16969	FALSE	0	0	0	0.000666937	1	0	0	FALSE	0.000222312	0
FHOD3	rs56312610	18	34063911	0.0815109	A	G	-0.00102999	0.000882896	0.243371	1453231042	-1.1666	FALSE	0	0	0	0.000664535	1	0	0	FALSE	0.000221512	0
FHOD3	rs2172946	18	34125987	0.229622	A	G	-0.000667432	0.000573093	0.244176	1453231042	-1.16461	FALSE	0	0	0	0.000662996	1	0	0	FALSE	0.000220999	0
FHOD3	rs4799430	18	34302329	0.494036	C	T	0.000558853	0.000480698	0.244997	1453231042	1.16259	FALSE	0	0	0	0.000661435	1	0	0	FALSE	0.000220478	0
FHOD3	rs4799426	18	34280891	0.318091	A	G	0.000585735	0.000504461	0.245597	1453231042	1.16111	FALSE	0	0	0	0.0006603	1	0	0	FALSE	0.0002201	0
FHOD3	rs561740	18	34272276	0.32008	C	G	-0.00058535	0.000504547	0.245987	1453231042	-1.16015	FALSE	0	0	0	0.000659566	1	0	0	FALSE	0.000219855	0
FHOD3	rs17566463	18	34169507	0.109344	T	G	0.000909603	0.00078624	0.247312	1453231042	1.1569	FALSE	0	0	0	0.000657089	1	0	0	FALSE	0.00021903	0
FHOD3	rs949242	18	34065941	0.0805169	C	T	-0.00102022	0.000883	0.247925	1453231042	-1.1554	FALSE	0	0	0	0.000655951	1	0	0	FALSE	0.00021865	0
FHOD3	rs12457694	18	34197250	0.0447316	C	T	0.00482524	0.00418293	0.248682	1453231042	1.15356	FALSE	0	0	0	0.000654554	1	0	0	FALSE	0.000218185	0
FHOD3	rs6507170	18	34027683	0.148111	C	A	0.000737077	0.000639435	0.249033	1453231042	1.1527	FALSE	0	0	0	0.000653908	1	0	0	FALSE	0.000217969	0
FHOD3	rs9961386	18	34281671	0.319085	T	G	0.000578861	0.000503554	0.250329	1453231042	1.14955	FALSE	0	0	0	0.000651542	1	0	0	FALSE	0.000217181	0
FHOD3	rs948635	18	34284447	0.319085	C	G	0.00057315	0.000502286	0.253836	1453231042	1.14108	FALSE	0	0	0	0.000645252	1	0	0	FALSE	0.000215084	0
FHOD3	rs4799879	18	34280897	0.32008	G	A	0.000574428	0.000504276	0.254655	1453231042	1.13912	FALSE	0	0	0	0.000643807	1	0	0	FALSE	0.000214602	0
FHOD3	rs4327122	18	34064978	0.0805169	C	T	-0.000994828	0.000880746	0.258675	1453231042	-1.12953	FALSE	0	0	0	0.000636844	1	0	0	FALSE	0.000212281	0
FHOD3	rs112831160	18	34301430	0.0308151	C	T	-0.00164686	0.00146192	0.259953	1453231042	-1.1265	FALSE	0	0	0	0.000634673	1	0	0	FALSE	0.000211558	0
FHOD3	rs61243389	18	34030034	0.0944334	G	A	0.00088154	0.000782701	0.260047	1453231042	1.12628	FALSE	0	0	0	0.000634515	1	0	0	FALSE	0.000211505	0
FHOD3	rs78664079	18	34067262	0.0805169	A	G	-0.000986037	0.000877859	0.26134	1453231042	-1.12323	FALSE	0	0	0	0.000632342	1	0	0	FALSE	0.000210781	0
FHOD3	rs4799878	18	34280866	0.32008	C	T	0.000564783	0.000503994	0.262453	1453231042	1.12061	FALSE	0	0	0	0.000630488	1	0	0	FALSE	0.000210163	0
FHOD3	rs76321970	18	34066162	0.0805169	C	T	-0.000985497	0.000880229	0.262888	1453231042	-1.11959	FALSE	0	0	0	0.000629767	1	0	0	FALSE	0.000209922	0
FHOD3	rs9959105	18	34312289	0.305169	G	A	0.000574192	0.000514586	0.264493	1453231042	1.11583	FALSE	0	0	0	0.000627127	1	0	0	FALSE	0.000209042	0
FHOD3	rs12963480	18	34176369	0.328032	G	A	-0.000570937	0.000512731	0.265484	1453231042	-1.11352	FALSE	0	0	0	0.000625513	1	0	0	FALSE	0.000208504	0
FHOD3	rs479570	18	34273039	0.32008	T	C	-0.000559204	0.000502305	0.26559	1453231042	-1.11328	FALSE	0	0	0	0.000625342	1	0	0	FALSE	0.000208447	0
FHOD3	rs35556819	18	34195522	0.161034	T	C	-0.000763024	0.000685686	0.265799	1453231042	-1.11279	FALSE	0	0	0	0.000625003	1	0	0	FALSE	0.000208334	0
FHOD3	rs12969158	18	34117792	0.177932	A	G	-0.000678222	0.000609613	0.265904	1453231042	-1.11254	FALSE	0	0	0	0.000624833	1	0	0	FALSE	0.000208278	0
FHOD3	rs658167	18	34263060	0.337972	C	G	-0.000558984	0.000502455	0.265921	1453231042	-1.11251	FALSE	0	0	0	0.000624806	1	0	0	FALSE	0.000208269	0
FHOD3	rs34054521	18	34006157	0.347913	G	A	0.000554499	0.000501001	0.268388	1453231042	1.10678	FALSE	0	0	0	0.000620851	1	0	0	FALSE	0.00020695	0
FHOD3	rs117980326	18	34185735	0.0218688	A	C	0.00166041	0.00150197	0.26895	1453231042	1.10548	FALSE	0	0	0	0.000619959	1	0	0	FALSE	0.000206653	0
FHOD3	rs57726747	18	34071340	0.0815109	A	G	-0.000966764	0.000875796	0.26965	1453231042	-1.10387	FALSE	0	0	0	0.000618855	1	0	0	FALSE	0.000206285	0
FHOD3	rs35785750	18	34006114	0.345924	G	A	0.000551718	0.000500587	0.270399	1453231042	1.10214	FALSE	0	0	0	0.000617678	1	0	0	FALSE	0.000205893	0
FHOD3	rs113180835	18	34075348	0.0328032	C	T	0.00666606	0.00605133	0.270642	1453231042	1.10158	FALSE	0	0	0	0.000617298	1	0	0	FALSE	0.000205766	0
FHOD3	rs9966953	18	34126815	0.175944	C	T	0.000697361	0.000634706	0.271892	1453231042	1.09872	FALSE	0	0	0	0.000615352	1	0	0	FALSE	0.000205117	0
FHOD3	rs16968220	18	34291197	0.321074	C	A	0.000546796	0.000498527	0.272718	1453231042	1.09682	FALSE	0	0	0	0.000614076	1	0	0	FALSE	0.000204692	0
FHOD3	rs3809994	18	34297753	0.347913	C	T	0.000543959	0.000496975	0.273719	1453231042	1.09454	FALSE	0	0	0	0.00061254	1	0	0	FALSE	0.00020418	0
FHOD3	rs147679298	18	34315641	0.028827	C	G	-0.00155215	0.00142425	0.2758	1453231042	-1.0898	FALSE	0	0	0	0.00060938	1	0	0	FALSE	0.000203127	0
FHOD3	rs12605016	18	34140861	0.166004	G	A	0.00070496	0.000648888	0.277296	1453231042	1.08641	FALSE	0	0	0	0.000607137	1	0	0	FALSE	0.000202379	0
FHOD3	rs671447	18	34262350	0.338966	C	T	-0.000545054	0.000502096	0.277675	1453231042	-1.08556	FALSE	0	0	0	0.000606573	1	0	0	FALSE	0.000202191	0
FHOD3	rs7238325	18	34009826	0.341948	G	A	0.000544766	0.000502015	0.277851	1453231042	1.08516	FALSE	0	0	0	0.000606311	1	0	0	FALSE	0.000202104	0
FHOD3	rs948634	18	34284315	0.32008	T	G	0.000537339	0.000499442	0.281981	1453231042	1.07588	FALSE	0	0	0	0.000600262	1	0	0	FALSE	0.000200087	0
FHOD3	rs56281475	18	34063672	0.0715706	G	A	-0.00100902	0.000942426	0.284321	1453231042	-1.07066	FALSE	0	0	0	0.00059691	1	0	0	FALSE	0.00019897	0
FHOD3	rs62083978	18	34216471	0.0705765	T	C	-0.00120331	0.00112433	0.28451	1453231042	-1.07024	FALSE	0	0	0	0.000596642	1	0	0	FALSE	0.000198881	0
FHOD3	rs4799425	18	34170114	0.338966	C	T	0.000531522	0.000497633	0.285475	1453231042	1.0681	FALSE	0	0	0	0.000595277	1	0	0	FALSE	0.000198426	0
FHOD3	rs878913	18	34034731	0.0705765	C	G	0.000956184	0.000897461	0.28668	1453231042	1.06543	FALSE	0	0	0	0.000593585	1	0	0	FALSE	0.000197862	0
FHOD3	rs525374	18	34308481	0.286282	T	C	0.000578025	0.000546582	0.290271	1453231042	1.05753	FALSE	0	0	0	0.000588625	1	0	0	FALSE	0.000196208	0
FHOD3	rs116360804	18	34198331	0.157058	C	T	-0.000717141	0.000681027	0.292328	1453231042	-1.05303	FALSE	0	0	0	0.000585837	1	0	0	FALSE	0.000195279	0
FHOD3	rs62086184	18	34041612	0.136183	T	G	0.000704499	0.000669979	0.293018	1453231042	1.05152	FALSE	0	0	0	0.00058491	1	0	0	FALSE	0.00019497	0
FHOD3	rs17673792	18	34037773	0.0666004	C	T	0.0009589	0.000913327	0.293765	1453231042	1.0499	FALSE	0	0	0	0.000583912	1	0	0	FALSE	0.000194637	0
FHOD3	rs9941433	18	34302860	0.494036	C	T	0.00049725	0.000473876	0.294029	1453231042	1.04933	FALSE	0	0	0	0.000583561	1	0	0	FALSE	0.00019452	0
FHOD3	rs12458276	18	34113242	0.0715706	C	T	-0.000967074	0.000923885	0.295216	1453231042	-1.04675	FALSE	0	0	0	0.000581986	1	0	0	FALSE	0.000193995	0
FHOD3	rs17566163	18	34111563	0.0337972	G	C	0.00144768	0.00138927	0.297392	1453231042	1.04204	FALSE	0	0	0	0.000579134	1	0	0	FALSE	0.000193045	0
FHOD3	rs2848906	18	34186660	0.210736	C	T	0.000634783	0.000616729	0.303351	1453231042	1.02927	FALSE	0	0	0	0.000571526	1	0	0	FALSE	0.000190509	0
FHOD3	rs1874381	18	34122410	0.166004	G	A	-0.000643126	0.000625462	0.303836	1453231042	-1.02824	FALSE	0	0	0	0.000570919	1	0	0	FALSE	0.000190306	0
FHOD3	rs3744903	18	34310668	0.316103	C	T	0.000509905	0.000496922	0.304832	1453231042	1.02613	FALSE	0	0	0	0.00056968	1	0	0	FALSE	0.000189893	0
FHOD3	rs4477795	18	34292366	0.326044	C	T	0.000507087	0.000498777	0.309315	1453231042	1.01666	FALSE	0	0	0	0.000564198	1	0	0	FALSE	0.000188066	0
FHOD3	rs1365509	18	34299774	0.318091	A	G	0.000506118	0.00050011	0.311531	1453231042	1.01201	FALSE	0	0	0	0.000561546	1	0	0	FALSE	0.000187182	0
FHOD3	rs12960763	18	34111914	0.0994036	G	A	-0.000788711	0.000780853	0.312465	1453231042	-1.01006	FALSE	0	0	0	0.000560439	1	0	0	FALSE	0.000186813	0
FHOD3	rs11081961	18	34299071	0.319085	T	A	0.000503061	0.000499441	0.313816	1453231042	1.00725	FALSE	0	0	0	0.00055885	1	0	0	FALSE	0.000186283	0
FHOD3	rs12955561	18	34141129	0.106362	C	G	-0.000769363	0.000763912	0.313869	1453231042	-1.00714	FALSE	0	0	0	0.000558787	1	0	0	FALSE	0.000186262	0
FHOD3	rs116932233	18	34083657	0.0506958	T	C	-0.00118831	0.0011815	0.314528	1453231042	-1.00577	FALSE	0	0	0	0.000558018	1	0	0	FALSE	0.000186006	0
FHOD3	rs8089656	18	34200394	0.158052	T	C	-0.000675063	0.000671606	0.314826	1453231042	-1.00515	FALSE	0	0	0	0.00055767	1	0	0	FALSE	0.00018589	0
FHOD3	rs621214	18	34258168	0.455268	T	C	-0.000471311	0.000472271	0.318296	1453231042	-0.997966	FALSE	0	0	0	0.000553674	1	0	0	FALSE	0.000184558	0
FHOD3	rs9956820	18	34301780	0.32008	A	T	0.000498587	0.000499727	0.318415	1453231042	0.99772	FALSE	0	0	0	0.000553538	1	0	0	FALSE	0.000184513	0
FHOD3	rs11875978	18	34011894	0.0894632	C	T	0.000820126	0.000822258	0.318567	1453231042	0.997408	FALSE	0	0	0	0.000553365	1	0	0	FALSE	0.000184455	0
FHOD3	rs552019	18	34268367	0.497018	T	G	-0.000466496	0.000468249	0.319125	1453231042	-0.996257	FALSE	0	0	0	0.000552731	1	0	0	FALSE	0.000184244	0
FHOD3	rs4799431	18	34304107	0.494036	C	T	0.000469298	0.000472431	0.32053	1453231042	0.993368	FALSE	0	0	0	0.000551145	1	0	0	FALSE	0.000183715	0
FHOD3	rs59180832	18	34098651	0.102386	T	C	-0.000779216	0.000785815	0.321392	1453231042	-0.991601	FALSE	0	0	0	0.000550179	1	0	0	FALSE	0.000183393	0
FHOD3	rs12607440	18	34072690	0.0705765	C	T	-0.000929131	0.000939335	0.322596	1453231042	-0.989137	FALSE	0	0	0	0.000548838	1	0	0	FALSE	0.000182946	0
FHOD3	rs8087319	18	34010923	0.196819	T	C	0.000610978	0.000618233	0.323023	1453231042	0.988265	FALSE	0	0	0	0.000548365	1	0	0	FALSE	0.000182788	0
FHOD3	rs2957176	18	34229559	0.212724	C	T	0.000560826	0.000568243	0.323668	1453231042	0.986947	FALSE	0	0	0	0.000547652	1	0	0	FALSE	0.000182551	0
FHOD3	rs4799429	18	34302276	0.494036	C	T	0.000468837	0.000475098	0.32373	1453231042	0.986822	FALSE	0	0	0	0.000547584	1	0	0	FALSE	0.000182528	0
FHOD3	rs7240383	18	34298732	0.32008	G	C	0.000491944	0.000499444	0.324632	1453231042	0.984984	FALSE	0	0	0	0.000546593	1	0	0	FALSE	0.000182198	0
FHOD3	rs4349223	18	34121375	0.101392	C	A	-0.000768817	0.000781122	0.324994	1453231042	-0.984247	FALSE	0	0	0	0.000546196	1	0	0	FALSE	0.000182065	0
FHOD3	rs76106539	18	34275906	0.0516899	A	G	-0.00114862	0.00117433	0.328022	1453231042	-0.978105	FALSE	0	0	0	0.000542915	1	0	0	FALSE	0.000180972	0
FHOD3	rs78189426	18	34267433	0.0228628	C	T	0.00138369	0.00141685	0.328772	1453231042	0.97659	FALSE	0	0	0	0.000542111	1	0	0	FALSE	0.000180704	0
FHOD3	rs7228898	18	34199429	0.158052	T	C	-0.000654318	0.000670191	0.328908	1453231042	-0.976316	FALSE	0	0	0	0.000541966	1	0	0	FALSE	0.000180655	0
FHOD3	rs1076993	18	34204260	0.156064	T	G	0.000651185	0.000669262	0.330559	1453231042	0.972989	FALSE	0	0	0	0.000540212	1	0	0	FALSE	0.000180071	0
FHOD3	rs12454250	18	34301474	0.497018	T	C	0.000458728	0.000471619	0.330719	1453231042	0.972666	FALSE	0	0	0	0.000540042	1	0	0	FALSE	0.000180014	0
FHOD3	rs9962453	18	34309966	0.318091	C	T	0.000482193	0.000496147	0.331113	1453231042	0.971874	FALSE	0	0	0	0.000539626	1	0	0	FALSE	0.000179875	0
FHOD3	rs12458683	18	34091305	0.0725646	A	G	-0.000892444	0.000919641	0.331834	1453231042	-0.970427	FALSE	0	0	0	0.000538868	1	0	0	FALSE	0.000179623	0
FHOD3	rs12605417	18	34294896	0.318091	C	T	0.000483504	0.00049865	0.332233	1453231042	0.969626	FALSE	0	0	0	0.00053845	1	0	0	FALSE	0.000179483	0
FHOD3	rs12961352	18	34100580	0.102386	A	C	-0.000753474	0.000777907	0.332749	1453231042	-0.968591	FALSE	0	0	0	0.00053791	1	0	0	FALSE	0.000179303	0
FHOD3	rs879567	18	34311643	0.318091	A	G	0.000479991	0.000496034	0.333215	1453231042	0.967659	FALSE	0	0	0	0.000537425	1	0	0	FALSE	0.000179142	0
FHOD3	rs879568	18	34311659	0.318091	G	C	0.000475442	0.000495778	0.337567	1453231042	0.958983	FALSE	0	0	0	0.000532952	1	0	0	FALSE	0.000177651	0
FHOD3	rs4799883	18	34311291	0.318091	G	A	0.000472758	0.000495654	0.340182	1453231042	0.953806	FALSE	0	0	0	0.00053032	1	0	0	FALSE	0.000176773	0
FHOD3	rs17651157	18	34107452	0.0725646	T	C	-0.000870291	0.00091993	0.344128	1453231042	-0.94604	FALSE	0	0	0	0.000526422	1	0	0	FALSE	0.000175474	0
FHOD3	rs4371230	18	34309634	0.318091	G	A	0.000467817	0.000495384	0.344989	1453231042	0.944353	FALSE	0	0	0	0.000525583	1	0	0	FALSE	0.000175194	0
FHOD3	rs12957930	18	34136707	0.105368	C	T	-0.000725975	0.000770357	0.345994	1453231042	-0.942388	FALSE	0	0	0	0.00052461	1	0	0	FALSE	0.00017487	0
FHOD3	rs12457257	18	34008468	0.341948	G	A	-0.00200373	0.00212736	0.34625	1453231042	-0.941887	FALSE	0	0	0	0.000524362	1	0	0	FALSE	0.000174787	0
FHOD3	rs12954834	18	34104569	0.101392	C	T	-0.000729607	0.000776105	0.347172	1453231042	-0.940088	FALSE	0	0	0	0.000523475	1	0	0	FALSE	0.000174492	0
FHOD3	rs74480696	18	34273111	0.0308151	C	G	-0.00135939	0.00144699	0.347497	1453231042	-0.939455	FALSE	0	0	0	0.000523164	1	0	0	FALSE	0.000174388	0
FHOD3	rs2644263	18	34229638	0.212724	C	A	0.000523202	0.000566657	0.355844	1453231042	0.923313	FALSE	0	0	0	0.000515357	1	0	0	FALSE	0.000171786	0
FHOD3	rs11872359	18	34199409	0.157058	G	C	-0.000614938	0.000667496	0.356914	1453231042	-0.921262	FALSE	0	0	0	0.000514383	1	0	0	FALSE	0.000171461	0
FHOD3	rs117573129	18	34294704	0.0397614	C	T	-0.00116055	0.00125975	0.356919	1453231042	-0.921252	FALSE	0	0	0	0.000514379	1	0	0	FALSE	0.00017146	0
FHOD3	rs80102630	18	34199709	0.157058	A	G	-0.000614168	0.000667584	0.35758	1453231042	-0.919986	FALSE	0	0	0	0.00051378	1	0	0	FALSE	0.00017126	0
FHOD3	rs12966985	18	34113642	0.0994036	G	A	-0.000715012	0.000778239	0.358223	1453231042	-0.918756	FALSE	0	0	0	0.000513199	1	0	0	FALSE	0.000171066	0
FHOD3	rs10502662	18	34143431	0.140159	T	A	-0.000582238	0.000643518	0.365585	1453231042	-0.904774	FALSE	0	0	0	0.000506698	1	0	0	FALSE	0.000168899	0
FHOD3	rs113448722	18	34202979	0.027833	T	C	-0.00167793	0.00185452	0.365585	1453231042	-0.904775	FALSE	0	0	0	0.000506698	1	0	0	FALSE	0.000168899	0
FHOD3	rs74929354	18	34198992	0.157058	A	T	-0.000599	0.000666286	0.368646	1453231042	-0.899013	FALSE	0	0	0	0.000504072	1	0	0	FALSE	0.000168024	0
FHOD3	rs2172945	18	34202084	0.15507	G	A	0.000598975	0.00066702	0.369193	1453231042	0.897987	FALSE	0	0	0	0.000503608	1	0	0	FALSE	0.000167869	0
FHOD3	rs12956471	18	34141546	0.105368	G	A	-0.000683563	0.000764378	0.371176	1453231042	-0.894273	FALSE	0	0	0	0.000501934	1	0	0	FALSE	0.000167311	0
FHOD3	rs77153727	18	34200095	0.157058	A	G	-0.000595278	0.000666093	0.37149	1453231042	-0.893686	FALSE	0	0	0	0.000501671	1	0	0	FALSE	0.000167224	0
FHOD3	rs12965001	18	34180013	0.0695825	A	C	-0.000918165	0.00102916	0.372311	1453231042	-0.892153	FALSE	0	0	0	0.000500985	1	0	0	FALSE	0.000166995	0
FHOD3	rs80092711	18	34205268	0.157058	T	C	-0.000593858	0.000666035	0.37259	1453231042	-0.891632	FALSE	0	0	0	0.000500752	1	0	0	FALSE	0.000166917	0
FHOD3	rs11663891	18	34267891	0.230616	A	G	-0.000535667	0.000601222	0.372949	1453231042	-0.890963	FALSE	0	0	0	0.000500454	1	0	0	FALSE	0.000166818	0
FHOD3	rs76983521	18	34199659	0.157058	G	A	-0.000592089	0.000665617	0.373716	1453231042	-0.889534	FALSE	0	0	0	0.000499817	1	0	0	FALSE	0.000166606	0
FHOD3	rs55930272	18	34159219	0.0397614	G	A	0.0012727	0.00143668	0.375691	1453231042	0.885863	FALSE	0	0	0	0.000498191	1	0	0	FALSE	0.000166064	0
FHOD3	rs903732	18	34184093	0.0874751	G	A	-0.000707141	0.000799424	0.376392	1453231042	-0.884563	FALSE	0	0	0	0.000497618	1	0	0	FALSE	0.000165873	0
FHOD3	rs12971276	18	34094900	0.100398	G	T	-0.000685295	0.000775844	0.37708	1453231042	-0.883289	FALSE	0	0	0	0.000497058	1	0	0	FALSE	0.000165686	0
FHOD3	rs2644253	18	34205385	0.157058	A	G	0.000587348	0.000665335	0.377352	1453231042	0.882786	FALSE	0	0	0	0.000496838	1	0	0	FALSE	0.000165613	0
FHOD3	rs12971049	18	34094939	0.100398	C	G	-0.000674495	0.000775097	0.384187	1453231042	-0.870207	FALSE	0	0	0	0.00049139	1	0	0	FALSE	0.000163797	0
FHOD3	rs12954684	18	34104515	0.101392	A	T	-0.000672239	0.000774541	0.385438	1453231042	-0.86792	FALSE	0	0	0	0.000490414	1	0	0	FALSE	0.000163471	0
FHOD3	rs11663887	18	34267792	0.23161	C	T	-0.000519029	0.0005995	0.386616	1453231042	-0.86577	FALSE	0	0	0	0.000489501	1	0	0	FALSE	0.000163167	0
FHOD3	rs1390430	18	34119047	0.101392	T	C	-0.000671867	0.00077661	0.386969	1453231042	-0.865128	FALSE	0	0	0	0.000489229	1	0	0	FALSE	0.000163076	0
FHOD3	rs11664763	18	34268690	0.23161	C	T	-0.000517483	0.000599347	0.387911	1453231042	-0.863412	FALSE	0	0	0	0.000488504	1	0	0	FALSE	0.000162835	0
FHOD3	rs79377341	18	34123769	0.0646123	G	C	0.000866593	0.00100631	0.389148	1453231042	0.861163	FALSE	0	0	0	0.000487558	1	0	0	FALSE	0.000162519	0
FHOD3	rs624603	18	34266036	0.449304	G	A	-0.000399343	0.000465249	0.390703	1453231042	-0.858343	FALSE	0	0	0	0.000486377	1	0	0	FALSE	0.000162126	0
FHOD3	rs117506201	18	34241031	0.0228628	G	A	0.00121924	0.00143165	0.394418	1453231042	0.851632	FALSE	0	0	0	0.000483594	1	0	0	FALSE	0.000161198	0
FHOD3	rs76212203	18	34292281	0.0178926	G	A	0.00225262	0.00265593	0.396355	1453231042	0.848149	FALSE	0	0	0	0.000482164	1	0	0	FALSE	0.000160721	0
FHOD3	rs7243835	18	34091675	0.102386	C	A	-0.00065354	0.000775507	0.399382	1453231042	-0.842726	FALSE	0	0	0	0.000479959	1	0	0	FALSE	0.000159986	0
FHOD3	rs2644249	18	34186220	0.266402	G	A	0.000461991	0.000549977	0.400898	1453231042	0.840019	FALSE	0	0	0	0.000478867	1	0	0	FALSE	0.000159622	0
FHOD3	rs1513848	18	34052194	0.0904573	A	G	-0.00291449	0.00347967	0.402268	1453231042	-0.837577	FALSE	0	0	0	0.000477887	1	0	0	FALSE	0.000159296	0
FHOD3	rs118107542	18	34239304	0.0228628	T	C	0.00119235	0.00142412	0.402449	1453231042	0.837255	FALSE	0	0	0	0.000477758	1	0	0	FALSE	0.000159253	0
FHOD3	rs79711417	18	34204586	0.15507	G	A	-0.000556825	0.000666753	0.403645	1453231042	-0.83513	FALSE	0	0	0	0.00047691	1	0	0	FALSE	0.00015897	0
FHOD3	rs78583772	18	34204573	0.15507	A	G	-0.00055567	0.000666655	0.404552	1453231042	-0.833519	FALSE	0	0	0	0.00047627	1	0	0	FALSE	0.000158757	0
FHOD3	rs78602742	18	34141190	0.027833	A	G	0.00113356	0.0013627	0.405491	1453231042	0.831854	FALSE	0	0	0	0.00047561	1	0	0	FALSE	0.000158537	0
FHOD3	rs595482	18	34257064	0.482107	A	G	-0.000387563	0.000466951	0.406546	1453231042	-0.829987	FALSE	0	0	0	0.000474872	1	0	0	FALSE	0.000158291	0
FHOD3	rs17673868	18	34061889	0.0815109	G	A	-0.00293956	0.00354791	0.407368	1453231042	-0.828534	FALSE	0	0	0	0.000474301	1	0	0	FALSE	0.0001581	0
FHOD3	rs482648	18	34256668	0.483101	A	G	-0.00038376	0.000463476	0.407668	1453231042	-0.828005	FALSE	0	0	0	0.000474093	1	0	0	FALSE	0.000158031	0
FHOD3	rs11081960	18	34269912	0.237575	G	A	-0.000483213	0.000590427	0.413121	1453231042	-0.818414	FALSE	0	0	0	0.000470364	1	0	0	FALSE	0.000156788	0
FHOD3	rs79787722	18	34037793	0.0168986	T	C	-0.00148001	0.00181263	0.414214	1453231042	-0.8165	FALSE	0	0	0	0.000469629	1	0	0	FALSE	0.000156543	0
FHOD3	rs4799421	18	34098851	0.0695825	G	A	-0.000742641	0.000914609	0.416805	1453231042	-0.811976	FALSE	0	0	0	0.000467902	1	0	0	FALSE	0.000155967	0
FHOD3	rs2469880	18	34268990	0.452286	C	A	-0.000377719	0.000465321	0.416941	1453231042	-0.811739	FALSE	0	0	0	0.000467812	1	0	0	FALSE	0.000155937	0
FHOD3	rs112183400	18	34317531	0.0298211	T	A	-0.00133776	0.00165563	0.419088	1453231042	-0.808004	FALSE	0	0	0	0.0004664	1	0	0	FALSE	0.000155467	0
FHOD3	rs75989574	18	34205245	0.15507	G	A	-0.000537641	0.00066581	0.419379	1453231042	-0.807499	FALSE	0	0	0	0.000466209	1	0	0	FALSE	0.000155403	0
FHOD3	rs8084815	18	34211813	0.162028	G	C	-0.000531105	0.000662323	0.422621	1453231042	-0.801882	FALSE	0	0	0	0.000464107	1	0	0	FALSE	0.000154702	0
FHOD3	rs1949233	18	34077959	0.0994036	A	G	0.000625302	0.000780493	0.423038	1453231042	0.801162	FALSE	0	0	0	0.000463839	1	0	0	FALSE	0.000154613	0
FHOD3	rs563563	18	34272445	0.460239	A	G	-0.000370546	0.000463684	0.424212	1453231042	-0.799135	FALSE	0	0	0	0.000463087	1	0	0	FALSE	0.000154362	0
FHOD3	rs2433395	18	34275219	0.461233	G	A	-0.000371146	0.000464517	0.424295	1453231042	-0.798992	FALSE	0	0	0	0.000463034	1	0	0	FALSE	0.000154345	0
FHOD3	rs77995790	18	34081413	0.0675944	T	C	-0.0007093	0.000889366	0.425141	1453231042	-0.797534	FALSE	0	0	0	0.000462496	1	0	0	FALSE	0.000154165	0
FHOD3	rs58092984	18	34244980	0.237575	C	T	-0.000460392	0.000578282	0.425952	1453231042	-0.796137	FALSE	0	0	0	0.000461981	1	0	0	FALSE	0.000153994	0
FHOD3	rs8085903	18	34215205	0.163022	C	T	-0.000526088	0.000661545	0.426473	1453231042	-0.795242	FALSE	0	0	0	0.000461652	1	0	0	FALSE	0.000153884	0
FHOD3	rs12604520	18	34069682	0.0705765	G	A	-0.000731113	0.000921591	0.427594	1453231042	-0.793316	FALSE	0	0	0	0.000460947	1	0	0	FALSE	0.000153649	0
FHOD3	rs624705	18	34265969	0.44831	G	T	-0.000368086	0.000464651	0.428258	1453231042	-0.792176	FALSE	0	0	0	0.00046053	1	0	0	FALSE	0.00015351	0
FHOD3	rs688596	18	34256035	0.482107	A	G	-0.00036547	0.000462559	0.429467	1453231042	-0.790104	FALSE	0	0	0	0.000459776	1	0	0	FALSE	0.000153259	0
FHOD3	rs72895597	18	34232657	0.202783	G	A	-0.000486966	0.000617041	0.429998	1453231042	-0.789195	FALSE	0	0	0	0.000459446	1	0	0	FALSE	0.000153149	0
FHOD3	rs7234884	18	34281439	0.460239	T	C	0.000364669	0.000463599	0.431514	1453231042	0.786604	FALSE	0	0	0	0.000458509	1	0	0	FALSE	0.000152836	0
FHOD3	rs499715	18	34243902	0.257455	T	G	-0.000420759	0.000537786	0.433985	1453231042	-0.78239	FALSE	0	0	0	0.000456996	1	0	0	FALSE	0.000152332	0
FHOD3	rs11659977	18	34270050	0.237575	G	A	-0.000459969	0.000589092	0.434915	1453231042	-0.780809	FALSE	0	0	0	0.000456431	1	0	0	FALSE	0.000152144	0
FHOD3	rs74965372	18	34109392	0.0705765	T	C	-0.000805163	0.00103459	0.436425	1453231042	-0.778245	FALSE	0	0	0	0.00045552	1	0	0	FALSE	0.00015184	0
FHOD3	rs2848919	18	34217777	0.196819	C	T	0.000457288	0.000590537	0.438718	1453231042	0.77436	FALSE	0	0	0	0.000454148	1	0	0	FALSE	0.000151383	0
FHOD3	rs10502659	18	34106890	0.0248509	G	A	0.00136647	0.00176954	0.439984	1453231042	0.77222	FALSE	0	0	0	0.000453398	1	0	0	FALSE	0.000151133	0
FHOD3	rs8084477	18	34211855	0.162028	A	G	-0.0005104	0.000660973	0.439999	1453231042	-0.772195	FALSE	0	0	0	0.000453389	1	0	0	FALSE	0.00015113	0
FHOD3	rs7239021	18	34282235	0.461233	G	A	-0.00153144	0.00198374	0.440117	1453231042	-0.771996	FALSE	0	0	0	0.000453319	1	0	0	FALSE	0.000151106	0
FHOD3	rs74753514	18	34149939	0.05666	G	A	0.00343414	0.00446343	0.441659	1453231042	0.769395	FALSE	0	0	0	0.000452411	1	0	0	FALSE	0.000150804	0
FHOD3	rs537063	18	34255116	0.483101	A	G	-0.000353801	0.000461991	0.443785	1453231042	-0.765818	FALSE	0	0	0	0.000451171	1	0	0	FALSE	0.00015039	0
FHOD3	rs548362	18	34267997	0.487078	A	G	-0.000354783	0.000463651	0.444156	1453231042	-0.765194	FALSE	0	0	0	0.000450955	1	0	0	FALSE	0.000150318	0
FHOD3	rs62082318	18	34080961	0.0964215	C	T	0.000590289	0.000774228	0.445807	1453231042	0.762423	FALSE	0	0	0	0.000450002	1	0	0	FALSE	0.000150001	0
FHOD3	rs499906	18	34243972	0.279324	G	T	-0.00038979	0.00051248	0.446898	1453231042	-0.760597	FALSE	0	0	0	0.000449376	1	0	0	FALSE	0.000149792	0
FHOD3	rs483351	18	34273440	0.460239	C	T	-0.000351286	0.000462959	0.447981	1453231042	-0.758786	FALSE	0	0	0	0.000448759	1	0	0	FALSE	0.000149586	0
FHOD3	rs112486391	18	34034748	0.028827	A	G	-0.0009978	0.00132965	0.452999	1453231042	-0.750425	FALSE	0	0	0	0.000445936	1	0	0	FALSE	0.000148645	0
FHOD3	rs9964327	18	34291283	0.461233	G	A	0.000347237	0.000462726	0.453004	1453231042	0.750417	FALSE	0	0	0	0.000445934	1	0	0	FALSE	0.000148645	0
FHOD3	rs16968087	18	34213421	0.162028	A	G	-0.00049497	0.000659646	0.45304	1453231042	-0.750356	FALSE	0	0	0	0.000445913	1	0	0	FALSE	0.000148638	0
FHOD3	rs79091544	18	34213208	0.162028	C	G	-0.000493368	0.000659859	0.454649	1453231042	-0.747687	FALSE	0	0	0	0.000445023	1	0	0	FALSE	0.000148341	0
FHOD3	rs78120969	18	34209050	0.161034	G	C	-0.000492053	0.000660124	0.456033	1453231042	-0.745395	FALSE	0	0	0	0.000444262	1	0	0	FALSE	0.000148087	0
FHOD3	rs687318	18	34261190	0.449304	C	T	-0.000340858	0.000460369	0.459057	1453231042	-0.740401	FALSE	0	0	0	0.000442617	1	0	0	FALSE	0.000147539	0
FHOD3	rs685435	18	34255303	0.482107	T	C	-0.000339345	0.000461059	0.461723	1453231042	-0.736012	FALSE	0	0	0	0.000441185	1	0	0	FALSE	0.000147062	0
FHOD3	rs501740	18	34244174	0.262425	G	T	-0.000393959	0.000536013	0.462352	1453231042	-0.73498	FALSE	0	0	0	0.00044085	1	0	0	FALSE	0.00014695	0
FHOD3	rs471713	18	34269346	0.451292	G	A	-0.000337823	0.000463476	0.466069	1453231042	-0.72889	FALSE	0	0	0	0.000438889	1	0	0	FALSE	0.000146296	0
FHOD3	rs537910	18	34255177	0.480119	C	T	-0.00033546	0.000461179	0.466983	1453231042	-0.727396	FALSE	0	0	0	0.000438412	1	0	0	FALSE	0.000146137	0
FHOD3	rs516514	18	34261048	0.449304	C	T	-0.000333748	0.00046275	0.470769	1453231042	-0.721229	FALSE	0	0	0	0.000436458	1	0	0	FALSE	0.000145486	0
FHOD3	rs79757024	18	34257591	0.100398	C	T	-0.000554374	0.000773553	0.473584	1453231042	-0.716659	FALSE	0	0	0	0.000435027	1	0	0	FALSE	0.000145009	0
FHOD3	rs75895411	18	34206070	0.161034	A	C	-0.000470541	0.000658247	0.474708	1453231042	-0.71484	FALSE	0	0	0	0.000434461	1	0	0	FALSE	0.00014482	0
FHOD3	rs74818539	18	34212098	0.162028	T	G	-0.00047058	0.000658949	0.475142	1453231042	-0.714137	FALSE	0	0	0	0.000434242	1	0	0	FALSE	0.000144747	0
FHOD3	rs79847275	18	34196408	0.137177	C	T	-0.000497767	0.000698063	0.475803	1453231042	-0.713068	FALSE	0	0	0	0.000433911	1	0	0	FALSE	0.000144637	0
FHOD3	rs687282	18	34255767	0.482107	T	C	-0.000328351	0.000460814	0.476126	1453231042	-0.712546	FALSE	0	0	0	0.00043375	1	0	0	FALSE	0.000144583	0
FHOD3	rs11659882	18	34245545	0.214712	G	T	-0.000443418	0.000622502	0.476269	1453231042	-0.712316	FALSE	0	0	0	0.000433679	1	0	0	FALSE	0.00014456	0
FHOD3	rs1815834	18	34284478	0.460239	G	A	0.000328683	0.000461501	0.476339	1453231042	0.712204	FALSE	0	0	0	0.000433644	1	0	0	FALSE	0.000144548	0
FHOD3	rs4420602	18	34284248	0.460239	C	T	0.00032536	0.00046143	0.480741	1453231042	0.705111	FALSE	0	0	0	0.00043147	1	0	0	FALSE	0.000143823	0
FHOD3	rs7231766	18	34284862	0.460239	G	A	0.000324893	0.00046139	0.481332	1453231042	0.704162	FALSE	0	0	0	0.000431181	1	0	0	FALSE	0.000143727	0
FHOD3	rs75323193	18	34212265	0.162028	T	G	-0.00046193	0.000658247	0.482831	1453231042	-0.701757	FALSE	0	0	0	0.000430453	1	0	0	FALSE	0.000143484	0
FHOD3	rs73948069	18	34151659	0.0854871	C	T	0.000627345	0.000896554	0.484096	1453231042	0.699729	FALSE	0	0	0	0.000429842	1	0	0	FALSE	0.000143281	0
FHOD3	rs74583186	18	34213509	0.161034	G	A	-0.000450859	0.000657782	0.493077	1453231042	-0.685423	FALSE	0	0	0	0.000425604	1	0	0	FALSE	0.000141868	0
FHOD3	rs79603670	18	34213289	0.161034	A	G	-0.000449059	0.000657666	0.494729	1453231042	-0.682806	FALSE	0	0	0	0.000424843	1	0	0	FALSE	0.000141614	0
FHOD3	rs62083981	18	34232543	0.0298211	G	A	-0.000983782	0.00145322	0.498426	1453231042	-0.676968	FALSE	0	0	0	0.00042316	1	0	0	FALSE	0.000141053	0
FHOD3	rs76682740	18	34215505	0.16004	G	C	-0.000444655	0.000657678	0.498978	1453231042	-0.676098	FALSE	0	0	0	0.000422911	1	0	0	FALSE	0.00014097	0
FHOD3	rs657171	18	34253625	0.261431	T	C	-0.000351212	0.000522479	0.501454	1453231042	-0.672204	FALSE	0	0	0	0.000421802	1	0	0	FALSE	0.000140601	0
FHOD3	rs79026601	18	34206449	0.161034	A	G	-0.000440613	0.000656462	0.502098	1453231042	-0.671193	FALSE	0	0	0	0.000421516	1	0	0	FALSE	0.000140505	0
FHOD3	rs9964666	18	34291877	0.45328	A	G	0.000308785	0.000461692	0.503615	1453231042	0.668812	FALSE	0	0	0	0.000420844	1	0	0	FALSE	0.000140281	0
FHOD3	rs2644266	18	34231270	0.260437	A	G	0.000353609	0.000531677	0.505999	1453231042	0.665081	FALSE	0	0	0	0.000419798	1	0	0	FALSE	0.000139933	0
FHOD3	rs11081959	18	34194451	0.0447316	C	T	0.000657541	0.000993893	0.508239	1453231042	0.661582	FALSE	0	0	0	0.000418825	1	0	0	FALSE	0.000139608	0
FHOD3	rs77303901	18	34138533	0.0636183	T	A	0.00066009	0.00100802	0.512572	1453231042	0.654838	FALSE	0	0	0	0.00041697	1	0	0	FALSE	0.00013899	0
FHOD3	rs1708693	18	34010998	0.210736	A	C	-0.000414544	0.000633242	0.512701	1453231042	-0.654638	FALSE	0	0	0	0.000416915	1	0	0	FALSE	0.000138972	0
FHOD3	rs71366396	18	34148277	0.146123	C	A	-0.000415377	0.000636812	0.514223	1453231042	-0.652276	FALSE	0	0	0	0.000416272	1	0	0	FALSE	0.000138757	0
FHOD3	rs6507179	18	34203793	0.145129	G	A	-0.000426738	0.000672496	0.525716	1453231042	-0.634559	FALSE	0	0	0	0.000411554	1	0	0	FALSE	0.000137185	0
FHOD3	rs117665953	18	34088031	0.0188867	A	G	-0.00128293	0.00202382	0.526136	1453231042	-0.633916	FALSE	0	0	0	0.000411386	1	0	0	FALSE	0.000137129	0
FHOD3	rs3859356	18	34128136	0.143141	G	C	-0.000400743	0.000633717	0.527146	1453231042	-0.632369	FALSE	0	0	0	0.000410983	1	0	0	FALSE	0.000136994	0
FHOD3	rs139214593	18	34010370	0.0725646	G	A	0.000529216	0.00083877	0.528078	1453231042	0.630943	FALSE	0	0	0	0.000410613	1	0	0	FALSE	0.000136871	0
FHOD3	rs75304477	18	34093261	0.0168986	T	C	-0.0010878	0.00173015	0.529526	1453231042	-0.62873	FALSE	0	0	0	0.000410041	1	0	0	FALSE	0.00013668	0
FHOD3	rs1105460	18	34124783	0.467197	A	G	-0.00122441	0.00198619	0.537588	1453231042	-0.616465	FALSE	0	0	0	0.000406922	1	0	0	FALSE	0.000135641	0
FHOD3	rs903733	18	34184197	0.153082	G	T	-0.000376862	0.00061212	0.538115	1453231042	-0.615666	FALSE	0	0	0	0.000406722	1	0	0	FALSE	0.000135574	0
FHOD3	rs12956202	18	34187189	0.237575	G	C	-0.000364261	0.000593787	0.539576	1453231042	-0.613454	FALSE	0	0	0	0.000406169	1	0	0	FALSE	0.00013539	0
FHOD3	rs12605111	18	34005564	0.234592	C	T	0.00143737	0.00235046	0.540851	1453231042	0.611527	FALSE	0	0	0	0.00040569	1	0	0	FALSE	0.00013523	0
FHOD3	rs2644268	18	34240401	0.256461	G	C	0.000324183	0.000533249	0.543227	1453231042	0.60794	FALSE	0	0	0	0.000404804	1	0	0	FALSE	0.000134935	0
FHOD3	rs2848905	18	34187236	0.215706	A	G	0.000339724	0.000565991	0.548354	1453231042	0.600229	FALSE	0	0	0	0.000402923	1	0	0	FALSE	0.000134308	0
FHOD3	rs503274	18	34253745	0.287276	C	T	-0.000304773	0.000508768	0.549146	1453231042	-0.599041	FALSE	0	0	0	0.000402636	1	0	0	FALSE	0.000134212	0
FHOD3	rs117976642	18	34073962	0.0238569	A	G	0.000912027	0.00154286	0.554436	1453231042	0.591126	FALSE	0	0	0	0.000400744	1	0	0	FALSE	0.000133581	0
FHOD3	rs72893896	18	34157719	0.0646123	C	T	0.000618351	0.00104782	0.555105	1453231042	0.590128	FALSE	0	0	0	0.000400508	1	0	0	FALSE	0.000133503	0
FHOD3	rs1105459	18	34124950	0.466203	A	G	-0.00117117	0.00198595	0.555373	1453231042	-0.589729	FALSE	0	0	0	0.000400413	1	0	0	FALSE	0.000133471	0
FHOD3	rs8097423	18	34295581	0.219682	C	T	-0.00150478	0.00255188	0.555408	1453231042	-0.589675	FALSE	0	0	0	0.000400401	1	0	0	FALSE	0.000133467	0
FHOD3	rs8097414	18	34295600	0.219682	A	G	-0.0015039	0.00255189	0.55564	1453231042	-0.589329	FALSE	0	0	0	0.000400319	1	0	0	FALSE	0.00013344	0
FHOD3	rs74715697	18	34138492	0.0636183	A	G	0.000582112	0.000994775	0.558434	1453231042	0.585169	FALSE	0	0	0	0.000399342	1	0	0	FALSE	0.000133114	0
FHOD3	rs7245178	18	34026369	0.149105	C	T	-0.00157215	0.00268747	0.558552	1453231042	-0.584994	FALSE	0	0	0	0.000399301	1	0	0	FALSE	0.0001331	0
FHOD3	rs138080352	18	34067965	0.0188867	A	G	0.000970876	0.0016639	0.559561	1453231042	0.583493	FALSE	0	0	0	0.000398951	1	0	0	FALSE	0.000132984	0
FHOD3	rs11659192	18	34269738	0.0775348	C	A	0.000553242	0.000981893	0.573133	1453231042	0.563444	FALSE	0	0	0	0.000394391	1	0	0	FALSE	0.000131464	0
FHOD3	rs12456823	18	34201645	0.0457256	A	G	0.000552181	0.000985584	0.575304	1453231042	0.560258	FALSE	0	0	0	0.000393685	1	0	0	FALSE	0.000131228	0
FHOD3	rs80198208	18	34201862	0.145129	C	T	-0.0003715	0.000670431	0.579496	1453231042	-0.554121	FALSE	0	0	0	0.000392341	1	0	0	FALSE	0.00013078	0
FHOD3	rs869389	18	34141489	0.0626243	C	G	0.000535467	0.000990375	0.588734	1453231042	0.540671	FALSE	0	0	0	0.000389463	1	0	0	FALSE	0.000129821	0
FHOD3	rs869421	18	34124494	0.0636183	C	G	0.00216182	0.00404986	0.593479	1453231042	0.533802	FALSE	0	0	0	0.000388029	1	0	0	FALSE	0.000129343	0
FHOD3	rs2848918	18	34219126	0.26839	T	G	0.000279007	0.000527825	0.597084	1453231042	0.528599	FALSE	0	0	0	0.000386958	1	0	0	FALSE	0.000128986	0
FHOD3	rs1893433	18	34232952	0.2833	T	C	0.000262176	0.000515094	0.610761	1453231042	0.508987	FALSE	0	0	0	0.000383041	1	0	0	FALSE	0.00012768	0
FHOD3	rs17673891	18	34070528	0.0685885	T	G	-0.000462368	0.000921172	0.615714	1453231042	-0.501934	FALSE	0	0	0	0.000381678	1	0	0	FALSE	0.000127226	0
FHOD3	rs13381428	18	34130353	0.0626243	C	T	0.000495323	0.0009957	0.618863	1453231042	0.497462	FALSE	0	0	0	0.000380826	1	0	0	FALSE	0.000126942	0
FHOD3	rs78489596	18	34061917	0.0576541	G	A	-0.000474538	0.00095551	0.619448	1453231042	-0.496633	FALSE	0	0	0	0.000380669	1	0	0	FALSE	0.00012689	0
FHOD3	rs77632965	18	34201362	0.144135	G	T	-0.000324655	0.0006689	0.627424	1453231042	-0.485356	FALSE	0	0	0	0.000378567	1	0	0	FALSE	0.000126189	0
FHOD3	rs16967896	18	34063794	0.0427435	G	A	-0.000547167	0.00112942	0.628053	1453231042	-0.484469	FALSE	0	0	0	0.000378404	1	0	0	FALSE	0.000126135	0
FHOD3	rs9948702	18	34221077	0.0178926	A	G	-0.000571221	0.00118218	0.62896	1453231042	-0.483192	FALSE	0	0	0	0.00037817	1	0	0	FALSE	0.000126057	0
FHOD3	rs545151	18	34305561	0.058648	A	G	0.000521997	0.00108727	0.631159	1453231042	0.480097	FALSE	0	0	0	0.000377607	1	0	0	FALSE	0.000125869	0
FHOD3	rs55659839	18	34137066	0.0636183	C	G	0.000472767	0.000990253	0.633063	1453231042	0.47742	FALSE	0	0	0	0.000377123	1	0	0	FALSE	0.000125708	0
FHOD3	rs72899541	18	34292610	0.217694	G	A	-0.000283477	0.000595338	0.63396	1453231042	-0.476161	FALSE	0	0	0	0.000376897	1	0	0	FALSE	0.000125632	0
FHOD3	rs16968192	18	34282579	0.220676	C	A	-0.000279762	0.000594788	0.6381	1453231042	-0.470357	FALSE	0	0	0	0.000375863	1	0	0	FALSE	0.000125288	0
FHOD3	rs2644267	18	34236026	0.249503	G	A	0.000248176	0.000530662	0.640019	1453231042	0.467672	FALSE	0	0	0	0.00037539	1	0	0	FALSE	0.00012513	0
FHOD3	rs148376063	18	34082535	0.0666004	A	C	0.00042093	0.000900698	0.640258	1453231042	0.467338	FALSE	0	0	0	0.000375331	1	0	0	FALSE	0.00012511	0
FHOD3	rs28887906	18	34222032	0.0178926	T	C	-0.000577195	0.00123686	0.640742	1453231042	-0.466661	FALSE	0	0	0	0.000375213	1	0	0	FALSE	0.000125071	0
FHOD3	rs61735993	18	34273279	0.218688	C	G	-0.000273882	0.000597734	0.646808	1453231042	-0.458201	FALSE	0	0	0	0.000373748	1	0	0	FALSE	0.000124583	0
FHOD3	rs7226609	18	34292683	0.220676	A	G	-0.000271975	0.000594225	0.647171	1453231042	-0.457696	FALSE	0	0	0	0.000373661	1	0	0	FALSE	0.000124554	0
FHOD3	rs2644262	18	34223566	0.271372	T	C	0.00023723	0.000520148	0.648331	1453231042	0.456082	FALSE	0	0	0	0.000373386	1	0	0	FALSE	0.000124462	0
FHOD3	rs55745725	18	34224008	0.0178926	C	T	-0.000535002	0.00118215	0.650862	1453231042	-0.452565	FALSE	0	0	0	0.00037279	1	0	0	FALSE	0.000124263	0
FHOD3	rs60414347	18	34205551	0.0447316	C	T	0.000440868	0.000977889	0.652107	1453231042	0.450837	FALSE	0	0	0	0.000372499	1	0	0	FALSE	0.000124166	0
FHOD3	rs17747740	18	34224498	0.0178926	G	A	-0.000531413	0.00118194	0.652991	1453231042	-0.449611	FALSE	0	0	0	0.000372293	1	0	0	FALSE	0.000124098	0
FHOD3	rs11664154	18	34285422	0.217694	G	A	-0.000266803	0.000597681	0.655311	1453231042	-0.446397	FALSE	0	0	0	0.000371758	1	0	0	FALSE	0.000123919	0
FHOD3	rs9962143	18	34285546	0.319085	C	T	0.00064383	0.00144489	0.655893	1453231042	0.445591	FALSE	0	0	0	0.000371624	1	0	0	FALSE	0.000123875	0
FHOD3	rs2047273	18	34184859	0.316103	T	C	0.00023073	0.000518629	0.656404	1453231042	0.444884	FALSE	0	0	0	0.000371507	1	0	0	FALSE	0.000123836	0
FHOD3	rs76353906	18	34158730	0.0238569	G	T	-0.000656737	0.0014858	0.658483	1453231042	-0.442008	FALSE	0	0	0	0.000371034	1	0	0	FALSE	0.000123678	0
FHOD3	rs11662615	18	34207907	0.151093	C	T	-0.000292548	0.000663243	0.65915	1453231042	-0.441087	FALSE	0	0	0	0.000370883	1	0	0	FALSE	0.000123628	0
FHOD3	rs7230513	18	34284069	0.219682	G	A	-0.000261407	0.000593985	0.659872	1453231042	-0.44009	FALSE	0	0	0	0.00037072	1	0	0	FALSE	0.000123573	0
FHOD3	rs28786430	18	34222001	0.0178926	C	G	-0.000520249	0.00118569	0.660826	1453231042	-0.438773	FALSE	0	0	0	0.000370505	1	0	0	FALSE	0.000123502	0
FHOD3	rs28578323	18	34288060	0.219682	T	A	-0.000260321	0.000594233	0.661329	1453231042	-0.438079	FALSE	0	0	0	0.000370393	1	0	0	FALSE	0.000123464	0
FHOD3	rs16968184	18	34280621	0.220676	C	T	-0.000259595	0.000593919	0.662047	1453231042	-0.437089	FALSE	0	0	0	0.000370232	1	0	0	FALSE	0.000123411	0
CLCNKA	rs2863437	1	16370664	0.064612	T	G	0.0001662	0.000994022	0.867213	1453231042	0.167199	FALSE	0	4.31133e-12	0	0		0	0	FALSE	1.07783e-12	0	0
BAG3	rs10047376	10	121326668	0.0904573	C	G	0.000487649	0.000808467	0.546391	1453231042	0.603178	FALSE	0	0	0	0		0	0	FALSE	0	0
BAG3	rs10160115	10	121366822	0.415507	G	A	-0.000153575	0.00046082	0.738934	1453231042	-0.333265	FALSE	0	0	0	0		0	0	FALSE	0	0
BAG3	rs10444117	10	121309199	0.0576541	T	C	0.0015128	0.0010537	0.151088	1453231042	1.4357	FALSE	0	0	0	0		0	0	FALSE	0	0
BAG3	rs10490921	10	121396692	0.0238569	T	C	0.000572001	0.00159969	0.720664	1453231042	0.357571	FALSE	0	0	0	0		0	0	FALSE	0	0
BAG3	rs10510057	10	121311048	0.188867	G	C	-0.000582586	0.00056038	0.298513	1453231042	-1.03963	FALSE	0	0	0	0		0	0	FALSE	0	0
BAG3	rs10749320	10	121202841	0.228628	C	G	0.000284483	0.000552973	0.60693	1453231042	0.514461	FALSE	0	0	0	0		0	0	FALSE	0	0
BAG3	rs10749321	10	121207961	0.444334	C	T	4.1808e-05	0.000468902	0.928953	1453231042	0.0891616	FALSE	0	0	0	0		0	0	FALSE	0	0
BAG3	rs10749322	10	121298478	0.104374	T	C	0.000149171	0.00080424	0.852852	1453231042	0.185481	FALSE	0	0	0	0		0	0	FALSE	0	0
BAG3	rs10749324	10	121316744	0.284294	C	A	0.000327185	0.000484928	0.499861	1453231042	0.674708	FALSE	0	0	0	0		0	0	FALSE	0	0
BAG3	rs10787973	10	121257200	0.162028	G	A	0.000176108	0.000635855	0.781809	1453231042	0.276962	FALSE	0	0	0	0		0	0	FALSE	0	0
BAG3	rs10787975	10	121267261	0.16501	T	G	8.9807e-05	0.0006223	0.885252	1453231042	0.144315	FALSE	0	0	0	0		0	0	FALSE	0	0
BAG3	rs10787976	10	121292123	0.094433	A	G	0.000238373	0.000837338	0.775889	1453231042	0.28468	FALSE	0	0	0	0		0	0	FALSE	0	0
BAG3	rs10787977	10	121298412	0.149105	T	C	8.48022e-05	0.000680113	0.90077	1453231042	0.124688	FALSE	0	0	0	0		0	0	FALSE	0	0
BAG3	rs10787978	10	121302419	0.336978	A	G	0.000450077	0.000518862	0.385706	1453231042	0.867431	FALSE	0	0	0	0		0	0	FALSE	0	0
BAG3	rs10787980	10	121314170	0.284294	C	T	6.90188e-05	0.000531744	0.896727	1453231042	0.129797	FALSE	0	0	0	0		0	0	FALSE	0	0
BAG3	rs10787981	10	121324768	0.300199	A	G	-0.000353503	0.000476499	0.458162	1453231042	-0.741876	FALSE	0	0	0	0		0	0	FALSE	0	0
BAG3	rs10787982	10	121324883	0.300199	C	G	-0.000353544	0.000476501	0.458112	1453231042	-0.741959	FALSE	0	0	0	0		0	0	FALSE	0	0
BAG3	rs10787984	10	121356829	0.175944	C	G	0.000328895	0.000610159	0.589865	1453231042	0.539032	FALSE	0	0	0	0		0	0	FALSE	0	0
BAG3	rs10787985	10	121404193	0.4334	C	T	-0.000236956	0.000474844	0.617766	1453231042	-0.499018	FALSE	0	0	0	0		0	0	FALSE	0	0
BAG3	rs10886478	10	121181278	0.457256	G	A	-0.00010563	0.000461512	0.818964	1453231042	-0.228878	FALSE	0	0	0	0		0	0	FALSE	0	0
BAG3	rs10886482	10	121200156	0.479125	A	G	-2.09777e-07	2.77212e-05	0.993962	1453231042	-0.00756738	FALSE	0	0	0	0		0	0	FALSE	0	0
BAG3	rs10886483	10	121200870	0.471173	T	C	2.72206e-05	0.000461436	0.952959	1453231042	0.0589909	FALSE	0	0	0	0		0	0	FALSE	0	0
BAG3	rs10886484	10	121200954	0.471173	G	A	9.48315e-05	0.000462509	0.837543	1453231042	0.205037	FALSE	0	0	0	0		0	0	FALSE	0	0
BAG3	rs10886485	10	121202200	0.471173	C	T	7.87885e-05	0.000462216	0.86465	1453231042	0.170458	FALSE	0	0	0	0		0	0	FALSE	0	0
BAG3	rs10886488	10	121219428	0.0805169	A	G	0.00131416	0.000906691	0.147226	1453231042	1.4494	FALSE	0	0	0	0		0	0	FALSE	0	0
BAG3	rs10886489	10	121223987	0.326044	C	T	-0.00054523	0.000517806	0.292359	1453231042	-1.05296	FALSE	0	0	0	0		0	0	FALSE	0	0
BAG3	rs10886490	10	121224305	0.352883	C	T	-6.82791e-05	0.000486126	0.8883	1453231042	-0.140456	FALSE	0	0	0	0		0	0	FALSE	0	0
BAG3	rs10886492	10	121225476	0.383698	G	A	2.1507e-05	0.000473929	0.963804	1453231042	0.0453802	FALSE	0	0	0	0		0	0	FALSE	0	0
BAG3	rs10886493	10	121225535	0.383698	G	C	-1.93066e-05	0.000474054	0.967514	1453231042	-0.0407265	FALSE	0	0	0	0		0	0	FALSE	0	0
BAG3	rs10886494	10	121227556	0.167992	C	T	-0.000414879	0.000669032	0.53518	1453231042	-0.620118	FALSE	0	0	0	0		0	0	FALSE	0	0
BAG3	rs10886498	10	121239860	0.0785288	C	A	0.00149963	0.000942968	0.111759	1453231042	1.59033	FALSE	0	0	0	0		0	0	FALSE	0	0
BAG3	rs10886499	10	121240083	0.0795229	A	G	0.00127085	0.00338202	0.707091	1453231042	0.375765	FALSE	0	0	0	0		0	0	FALSE	0	0
BAG3	rs10886500	10	121240865	0.0795229	T	C	0.00147724	0.000877105	0.0921386	1453231042	1.68422	FALSE	0	0	0	0		0	0	FALSE	0	0
BAG3	rs10886501	10	121243958	0.399602	G	A	0.000591288	0.000510503	0.246764	1453231042	1.15825	FALSE	0	0	0	0		0	0	FALSE	0	0
BAG3	rs10886503	10	121255749	0.110338	T	C	5.71028e-05	0.000774343	0.941214	1453231042	0.0737436	FALSE	0	0	0	0		0	0	FALSE	0	0
BAG3	rs10886504	10	121256112	0.162028	C	A	0.000380142	0.00066202	0.565822	1453231042	0.574216	FALSE	0	0	0	0		0	0	FALSE	0	0
BAG3	rs10886505	10	121277989	0.289264	G	T	6.82972e-05	0.000510195	0.893509	1453231042	0.133865	FALSE	0	0	0	0		0	0	FALSE	0	0
BAG3	rs10886506	10	121280219	0.33996	A	G	5.95288e-05	0.000499974	0.905225	1453231042	0.119064	FALSE	0	0	0	0		0	0	FALSE	0	0
BAG3	rs10886507	10	121288802	0.435388	T	C	-0.000140163	0.000465784	0.763477	1453231042	-0.300918	FALSE	0	0	0	0		0	0	FALSE	0	0
BAG3	rs10886508	10	121292897	0.230616	G	A	0.000120217	0.000530359	0.82068	1453231042	0.22667	FALSE	0	0	0	0		0	0	FALSE	0	0
BAG3	rs10886509	10	121301222	0.0805169	G	T	0.0011934	0.000905045	0.1873	1453231042	1.31861	FALSE	0	0	0	0		0	0	FALSE	0	0
BAG3	rs10886512	10	121316070	0.189861	G	C	-0.000595521	0.000560225	0.28778	1453231042	-1.063	FALSE	0	0	0	0		0	0	FALSE	0	0
BAG3	rs10886513	10	121323173	0.2833	T	C	-0.000363323	0.00048565	0.45439	1453231042	-0.748117	FALSE	0	0	0	0		0	0	FALSE	0	0
BAG3	rs10886515	10	121343589	0.245527	T	C	-0.000536066	0.000510166	0.293365	1453231042	-1.05077	FALSE	0	0	0	0		0	0	FALSE	0	0
BAG3	rs10886516	10	121359423	0.37674	A	G	-0.000410013	0.000462816	0.375667	1453231042	-0.885909	FALSE	0	0	0	0		0	0	FALSE	0	0
BAG3	rs10886517	10	121362969	0.159046	G	A	-0.000901973	0.00061566	0.142907	1453231042	-1.46505	FALSE	0	0	0	0		0	0	FALSE	0	0
BAG3	rs10886518	10	121364054	0.291252	T	C	-0.000126935	0.000487309	0.794492	1453231042	-0.260482	FALSE	0	0	0	0		0	0	FALSE	0	0
BAG3	rs10886519	10	121366194	0.378728	T	C	-0.000216582	0.000465964	0.642071	1453231042	-0.464805	FALSE	0	0	0	0		0	0	FALSE	0	0
BAG3	rs10886520	10	121367444	0.468191	A	G	3.30536e-05	0.000464185	0.943232	1453231042	0.0712078	FALSE	0	0	0	0		0	0	FALSE	0	0
BAG3	rs10886521	10	121367650	0.191849	A	G	-0.000676821	0.000577087	0.240867	1453231042	-1.17282	FALSE	0	0	0	0		0	0	FALSE	0	0
BAG3	rs10886522	10	121377209	0.0487078	T	C	0.00155401	0.0011128	0.162569	1453231042	1.39648	FALSE	0	0	0	0		0	0	FALSE	0	0
BAG3	rs10886523	10	121377286	0.0974155	G	A	0.000652306	0.000762224	0.392112	1453231042	0.855793	FALSE	0	0	0	0		0	0	FALSE	0	0
BAG3	rs10886524	10	121381712	0.274354	C	G	-5.48198e-05	0.000493899	0.911621	1453231042	-0.110994	FALSE	0	0	0	0		0	0	FALSE	0	0
BAG3	rs10886525	10	121382701	0.274354	T	C	-4.43014e-05	0.000496648	0.928922	1453231042	-0.0892008	FALSE	0	0	0	0		0	0	FALSE	0	0
BAG3	rs10886529	10	121427082	0.372763	G	A	0.000782273	0.000515054	0.128808	1453231042	1.51882	FALSE	0	0	0	0		0	0	FALSE	0	0
BAG3	rs1109488	10	121199647	0.471173	T	C	7.47993e-05	0.000462006	0.871384	1453231042	0.161901	FALSE	0	0	0	0		0	0	FALSE	0	0
BAG3	rs1109489	10	121199365	0.472167	T	C	4.44646e-05	0.000461547	0.923252	1453231042	0.0963382	FALSE	0	0	0	0		0	0	FALSE	0	0
BAG3	rs1109490	10	121199310	0.471173	T	C	7.47863e-05	0.000461995	0.871403	1453231042	0.161877	FALSE	0	0	0	0		0	0	FALSE	0	0
BAG3	rs111706703	10	121322439	0.0745527	G	A	-0.000224708	0.000948377	0.812703	1453231042	-0.23694	FALSE	0	0	0	0		0	0	FALSE	0	0
BAG3	rs111827738	10	121248226	0.0526839	T	C	-0.000642616	0.00102756	0.53172	1453231042	-0.625383	FALSE	0	0	0	0		0	0	FALSE	0	0
BAG3	rs11198914	10	121174463	0.256461	G	T	0.000376997	0.000544972	0.48908	1453231042	0.691773	FALSE	0	0	0	0		0	0	FALSE	0	0
BAG3	rs11198916	10	121180583	0.0775348	G	C	0.000938791	0.000787057	0.232953	1453231042	1.19279	FALSE	0	0	0	0		0	0	FALSE	0	0
BAG3	rs11198917	10	121182113	0.255467	C	T	0.000325746	0.000541532	0.547489	1453231042	0.601527	FALSE	0	0	0	0		0	0	FALSE	0	0
BAG3	rs11198918	10	121182580	0.0487078	T	C	-0.000709212	0.00407028	0.861676	1453231042	-0.174242	FALSE	0	0	0	0		0	0	FALSE	0	0
BAG3	rs11198919	10	121185522	0.0775348	C	T	0.000963337	0.000787299	0.221104	1453231042	1.2236	FALSE	0	0	0	0		0	0	FALSE	0	0
BAG3	rs11198922	10	121195971	0.472167	A	C	2.31834e-05	0.00046134	0.959921	1453231042	0.0502523	FALSE	0	0	0	0		0	0	FALSE	0	0
BAG3	rs11198923	10	121196008	0.0755467	G	A	0.00127669	0.000805364	0.112914	1453231042	1.58523	FALSE	0	0	0	0		0	0	FALSE	0	0
BAG3	rs11198924	10	121196844	0.472167	C	T	2.68315e-05	0.000461359	0.953623	1453231042	0.0581575	FALSE	0	0	0	0		0	0	FALSE	0	0
BAG3	rs11198925	10	121197057	0.375746	C	T	-0.000698362	0.000496851	0.15985	1453231042	-1.40558	FALSE	0	0	0	0		0	0	FALSE	0	0
BAG3	rs11198927	10	121202677	0.0755467	G	A	0.00120534	0.00080109	0.132422	1453231042	1.50462	FALSE	0	0	0	0		0	0	FALSE	0	0
BAG3	rs11198929	10	121207272	0.399602	C	T	-0.000362408	0.000494566	0.463692	1453231042	-0.73278	FALSE	0	0	0	0		0	0	FALSE	0	0
BAG3	rs11198931	10	121211689	0.0974155	G	A	0.00134685	0.000758243	0.0756874	1453231042	1.77628	FALSE	0	0	0	0		0	0	FALSE	0	0
BAG3	rs11198932	10	121216027	0.0606362	G	A	0.00157426	0.000935422	0.0923867	1453231042	1.68294	FALSE	0	0	0	0		0	0	FALSE	0	0
BAG3	rs11198933	10	121217429	0.0944334	T	C	0.000866298	0.000712153	0.223814	1453231042	1.21645	FALSE	0	0	0	0		0	0	FALSE	0	0
BAG3	rs11198934	10	121217683	0.0874751	C	T	0.000797719	0.000749673	0.287289	1453231042	1.06409	FALSE	0	0	0	0		0	0	FALSE	0	0
BAG3	rs11198935	10	121217984	0.0964215	T	C	0.000674788	0.000744928	0.365019	1453231042	0.905844	FALSE	0	0	0	0		0	0	FALSE	0	0
BAG3	rs11198938	10	121218869	0.0606362	G	C	0.00165454	0.000970883	0.0883511	1453231042	1.70416	FALSE	0	0	0	0		0	0	FALSE	0	0
BAG3	rs11198939	10	121222466	0.213718	T	C	0.000162831	0.000571021	0.775523	1453231042	0.285159	FALSE	0	0	0	0		0	0	FALSE	0	0
BAG3	rs11198940	10	121224408	0.38668	T	C	-2.0585e-05	0.000477037	0.965581	1453231042	-0.0431517	FALSE	0	0	0	0		0	0	FALSE	0	0
BAG3	rs11198941	10	121225384	0.212724	C	T	0.000202649	0.000568831	0.72165	1453231042	0.356255	FALSE	0	0	0	0		0	0	FALSE	0	0
BAG3	rs11198944	10	121226365	0.176938	C	T	-0.000560967	0.000667035	0.400356	1453231042	-0.840985	FALSE	0	0	0	0		0	0	FALSE	0	0
BAG3	rs11198947	10	121234016	0.0795229	G	T	0.00161947	0.000895388	0.0705014	1453231042	1.80868	FALSE	0	0	0	0		0	0	FALSE	0	0
BAG3	rs11198948	10	121234298	0.0258449	C	T	0.00353894	0.00166041	0.0330587	1453231042	2.13137	FALSE	0	0	0	0		0	0	FALSE	0	0
BAG3	rs11198949	10	121234434	0.0258449	C	T	0.00353794	0.0016603	0.0330969	1453231042	2.13091	FALSE	0	0	0	0		0	0	FALSE	0	0
BAG3	rs11198950	10	121235941	0.0785288	C	T	0.00156575	0.00088573	0.077103	1453231042	1.76775	FALSE	0	0	0	0		0	0	FALSE	0	0
BAG3	rs11198957	10	121238902	0.0795229	A	G	0.00151982	0.000880082	0.0841844	1453231042	1.72691	FALSE	0	0	0	0		0	0	FALSE	0	0
BAG3	rs11198958	10	121240479	0.0795229	C	T	0.00151143	0.000879385	0.0856621	1453231042	1.71874	FALSE	0	0	0	0		0	0	FALSE	0	0
BAG3	rs11198959	10	121241482	0.0795229	G	A	0.00149614	0.000878289	0.0884795	1453231042	1.70347	FALSE	0	0	0	0		0	0	FALSE	0	0
BAG3	rs11198960	10	121242665	0.0795229	T	C	0.00147308	0.000876045	0.0926634	1453231042	1.68151	FALSE	0	0	0	0		0	0	FALSE	0	0
BAG3	rs11198961	10	121242890	0.0795229	C	T	0.00145864	0.000874723	0.0954056	1453231042	1.66755	FALSE	0	0	0	0		0	0	FALSE	0	0
BAG3	rs11198963	10	121246339	0.0536779	G	A	-0.000201918	0.00102611	0.844	1453231042	-0.19678	FALSE	0	0	0	0		0	0	FALSE	0	0
BAG3	rs11198968	10	121249802	0.0506958	C	A	-0.00046809	0.00100535	0.641503	1453231042	-0.465599	FALSE	0	0	0	0		0	0	FALSE	0	0
BAG3	rs11198973	10	121251611	0.324056	G	T	0.000618068	0.000528878	0.242548	1453231042	1.16864	FALSE	0	0	0	0		0	0	FALSE	0	0
BAG3	rs11198974	10	121252831	0.22664	T	C	-0.000681096	0.000605811	0.260898	1453231042	-1.12427	FALSE	0	0	0	0		0	0	FALSE	0	0
BAG3	rs11198976	10	121254281	0.0467197	G	A	0.000221905	0.00111484	0.842226	1453231042	0.199047	FALSE	0	0	0	0		0	0	FALSE	0	0
BAG3	rs11198977	10	121256622	0.0467197	T	G	0.000348432	0.00110714	0.75298	1453231042	0.314712	FALSE	0	0	0	0		0	0	FALSE	0	0
BAG3	rs11198978	10	121258186	0.0437376	C	T	0.000266668	0.00109987	0.808429	1453231042	0.242453	FALSE	0	0	0	0		0	0	FALSE	0	0
BAG3	rs11198979	10	121261389	0.0437376	C	G	0.000319849	0.00110041	0.771309	1453231042	0.290663	FALSE	0	0	0	0		0	0	FALSE	0	0
BAG3	rs11198980	10	121265806	0.0497018	C	T	0.00050546	0.000998449	0.612685	1453231042	0.506245	FALSE	0	0	0	0		0	0	FALSE	0	0
BAG3	rs11198982	10	121271087	0.0497018	C	T	0.000634857	0.00102858	0.537093	1453231042	0.617216	FALSE	0	0	0	0		0	0	FALSE	0	0
BAG3	rs11198983	10	121272307	0.0497018	G	T	0.000551461	0.00101211	0.585847	1453231042	0.544865	FALSE	0	0	0	0		0	0	FALSE	0	0
BAG3	rs11198985	10	121277710	0.0506958	G	T	0.00067539	0.0010173	0.506751	1453231042	0.663906	FALSE	0	0	0	0		0	0	FALSE	0	0
BAG3	rs11198986	10	121277810	0.0526839	G	A	0.000701372	0.00101703	0.490427	1453231042	0.68963	FALSE	0	0	0	0		0	0	FALSE	0	0
BAG3	rs11198987	10	121277919	0.0666004	A	G	0.000137833	0.000917656	0.880606	1453231042	0.150201	FALSE	0	0	0	0		0	0	FALSE	0	0
BAG3	rs11198989	10	121278373	0.0666004	C	T	0.000165639	0.000921348	0.857326	1453231042	0.179779	FALSE	0	0	0	0		0	0	FALSE	0	0
BAG3	rs11198990	10	121279863	0.0516899	C	T	0.000856548	0.00103157	0.406349	1453231042	0.830337	FALSE	0	0	0	0		0	0	FALSE	0	0
BAG3	rs11198992	10	121280443	0.271372	A	C	0.000181837	0.000511797	0.722372	1453231042	0.355291	FALSE	0	0	0	0		0	0	FALSE	0	0
BAG3	rs11198995	10	121282886	0.276342	C	T	0.000263286	0.000514734	0.609001	1453231042	0.5115	FALSE	0	0	0	0		0	0	FALSE	0	0
BAG3	rs11198999	10	121285930	0.276342	A	G	0.000239388	0.000508747	0.637966	1453231042	0.470544	FALSE	0	0	0	0		0	0	FALSE	0	0
BAG3	rs11199000	10	121288885	0.23161	G	A	0.000150446	0.000525978	0.774855	1453231042	0.28603	FALSE	0	0	0	0		0	0	FALSE	0	0
BAG3	rs11199002	10	121293693	0.367793	G	A	6.73709e-05	0.000476563	0.887579	1453231042	0.141368	FALSE	0	0	0	0		0	0	FALSE	0	0
BAG3	rs11199005	10	121296029	0.0725646	G	A	-0.000243482	0.00352274	0.944896	1453231042	-0.0691171	FALSE	0	0	0	0		0	0	FALSE	0	0
BAG3	rs11199019	10	121323204	0.365805	A	G	0.000592989	0.000472311	0.209296	1453231042	1.2555	FALSE	0	0	0	0		0	0	FALSE	0	0
BAG3	rs11199030	10	121346763	0.156064	G	A	-0.000908865	0.000622691	0.144406	1453231042	-1.45958	FALSE	0	0	0	0		0	0	FALSE	0	0
BAG3	rs11199037	10	121357825	0.199801	G	T	-0.000821714	0.000561864	0.14361	1453231042	-1.46248	FALSE	0	0	0	0		0	0	FALSE	0	0
BAG3	rs11199038	10	121361181	0.385686	C	T	-0.00103204	0.00199983	0.605808	1453231042	-0.516067	FALSE	0	0	0	0		0	0	FALSE	0	0
BAG3	rs11199039	10	121361770	0.199801	C	G	-0.000834714	0.000565504	0.13993	1453231042	-1.47605	FALSE	0	0	0	0		0	0	FALSE	0	0
BAG3	rs11199041	10	121365398	0.217694	T	C	0.000304302	0.000566528	0.591175	1453231042	0.537134	FALSE	0	0	0	0		0	0	FALSE	0	0
BAG3	rs11199042	10	121365958	0.16004	G	T	-0.000907549	0.000619483	0.142918	1453231042	-1.46501	FALSE	0	0	0	0		0	0	FALSE	0	0
BAG3	rs11199045	10	121368477	0.189861	G	C	-0.00069289	0.00057818	0.230762	1453231042	-1.1984	FALSE	0	0	0	0		0	0	FALSE	0	0
BAG3	rs11199046	10	121373474	0.319085	C	G	-0.000272006	0.000518836	0.600096	1453231042	-0.524262	FALSE	0	0	0	0		0	0	FALSE	0	0
BAG3	rs11199047	10	121376017	0.0944334	T	C	0.000361972	0.000753027	0.630737	1453231042	0.480689	FALSE	0	0	0	0		0	0	FALSE	0	0
BAG3	rs11199048	10	121376122	0.0487078	C	T	0.000431655	0.0010083	0.668578	1453231042	0.428101	FALSE	0	0	0	0		0	0	FALSE	0	0
BAG3	rs11199049	10	121376917	0.298211	A	G	-0.000375219	0.000530026	0.478991	1453231042	-0.707926	FALSE	0	0	0	0		0	0	FALSE	0	0
BAG3	rs11199050	10	121377046	0.223658	T	C	-0.000569607	0.000554861	0.30462	1453231042	-1.02658	FALSE	0	0	0	0		0	0	FALSE	0	0
BAG3	rs11199057	10	121399011	0.0487078	G	T	0.00148243	0.00113424	0.191218	1453231042	1.30698	FALSE	0	0	0	0		0	0	FALSE	0	0
BAG3	rs11199059	10	121410670	0.319085	C	T	-0.000179999	0.000503619	0.720785	1453231042	-0.35741	FALSE	0	0	0	0		0	0	FALSE	0	0
BAG3	rs11199060	10	121413790	0.304175	A	T	-0.000255569	0.000515619	0.620138	1453231042	-0.495655	FALSE	0	0	0	0		0	0	FALSE	0	0
BAG3	rs11199061	10	121414758	0.0536779	C	A	0.00102916	0.0010742	0.338028	1453231042	0.958068	FALSE	0	0	0	0		0	0	FALSE	0	0
BAG3	rs11199063	10	121426652	0.277336	C	G	0.00101161	0.000582619	0.082508	1453231042	1.73632	FALSE	0	0	0	0		0	0	FALSE	0	0
BAG3	rs11199065	10	121437329	0.274354	A	G	0.00104718	0.000592554	0.0771892	1453231042	1.76723	FALSE	0	0	0	0		0	0	FALSE	0	0
BAG3	rs11199066	10	121440707	0.206759	T	C	-8.4743e-05	0.000568937	0.881593	1453231042	-0.14895	FALSE	0	0	0	0		0	0	FALSE	0	0
BAG3	rs112029	10	121440528	0.193837	C	T	-3.76591e-05	0.000580485	0.948273	1453231042	-0.0648753	FALSE	0	0	0	0		0	0	FALSE	0	0
BAG3	rs112797562	10	121233245	0.0427435	C	T	0.00207625	0.00134619	0.122997	1453231042	1.54232	FALSE	0	0	0	0		0	0	FALSE	0	0
BAG3	rs112976130	10	121408818	0.201789	C	A	0.000437807	0.000598984	0.46483	1453231042	0.730916	FALSE	0	0	0	0		0	0	FALSE	0	0
BAG3	rs113029729	10	121360274	0.05666	G	A	0.00118576	0.00129259	0.35896	1453231042	0.917349	FALSE	0	0	0	0		0	0	FALSE	0	0
BAG3	rs113128846	10	121270354	0.0506958	C	T	0.000644253	0.00111141	0.562136	1453231042	0.579671	FALSE	0	0	0	0		0	0	FALSE	0	0
BAG3	rs113205387	10	121253754	0.0516899	C	T	-0.000320492	0.000992228	0.746693	1453231042	-0.323003	FALSE	0	0	0	0		0	0	FALSE	0	0
BAG3	rs113562141	10	121320267	0.0894632	G	A	0.000448784	0.000809647	0.579376	1453231042	0.554296	FALSE	0	0	0	0		0	0	FALSE	0	0
BAG3	rs113900366	10	121329463	0.12326	G	A	6.41239e-05	0.000713605	0.928399	1453231042	0.0898592	FALSE	0	0	0	0		0	0	FALSE	0	0
BAG3	rs11528321	10	121311308	0.189861	C	T	-0.000650748	0.000563805	0.248415	1453231042	-1.15421	FALSE	0	0	0	0		0	0	FALSE	0	0
BAG3	rs115380771	10	121392148	0.0238569	C	T	0.000698029	0.00159837	0.662319	1453231042	0.436713	FALSE	0	0	0	0		0	0	FALSE	0	0
BAG3	rs11550215	10	121275099	0.0526839	G	A	-0.000424316	0.00100732	0.673585	1453231042	-0.421233	FALSE	0	0	0	0		0	0	FALSE	0	0
BAG3	rs115592286	10	121214025	0.0526839	C	T	-0.00112396	0.00119641	0.347505	1453231042	-0.93944	FALSE	0	0	0	0		0	0	FALSE	0	0
BAG3	rs115674037	10	121395589	0.0238569	C	G	0.000611957	0.00159994	0.7021	1453231042	0.382487	FALSE	0	0	0	0		0	0	FALSE	0	0
BAG3	rs115877525	10	121390747	0.0208748	C	T	0.00115126	0.00165199	0.485872	1453231042	0.696889	FALSE	0	0	0	0		0	0	FALSE	0	0
BAG3	rs11592320	10	121371426	0.253479	C	T	0.00044673	0.000550824	0.417353	1453231042	0.811022	FALSE	0	0	0	0		0	0	FALSE	0	0
BAG3	rs11592336	10	121371334	0.471173	G	A	0.00388072	0.00197976	0.0499729	1453231042	1.9602	FALSE	0	0	0	0		0	0	FALSE	0	0
BAG3	rs11594502	10	121221475	0.172962	T	C	-0.00027814	0.000658231	0.672619	1453231042	-0.422556	FALSE	0	0	0	0		0	0	FALSE	0	0
BAG3	rs11594596	10	121371328	0.471173	T	C	4.95703e-06	0.000459879	0.9914	1453231042	0.010779	FALSE	0	0	0	0		0	0	FALSE	0	0
BAG3	rs11596542	10	121370979	0.203777	A	G	0.000265257	0.0005804	0.647653	1453231042	0.457025	FALSE	0	0	0	0		0	0	FALSE	0	0
BAG3	rs11598154	10	121354334	0.127237	A	G	4.85928e-05	0.00069481	0.944244	1453231042	0.0699367	FALSE	0	0	0	0		0	0	FALSE	0	0
BAG3	rs11598331	10	121351367	0.126243	G	A	8.93604e-06	0.000694216	0.98973	1453231042	0.0128721	FALSE	0	0	0	0		0	0	FALSE	0	0
BAG3	rs11599510	10	121255484	0.0636183	A	G	-0.00040051	0.00104203	0.700714	1453231042	-0.384357	FALSE	0	0	0	0		0	0	FALSE	0	0
BAG3	rs116618532	10	121314587	0.0497018	A	G	0.000920226	0.00108464	0.396207	1453231042	0.848414	FALSE	0	0	0	0		0	0	FALSE	0	0
BAG3	rs116870185	10	121261943	0.0437376	C	T	0.000323706	0.00110045	0.768637	1453231042	0.294158	FALSE	0	0	0	0		0	0	FALSE	0	0
BAG3	rs116954028	10	121408409	0.0447316	G	A	0.000630463	0.00156339	0.686752	1453231042	0.403266	FALSE	0	0	0	0		0	0	FALSE	0	0
BAG3	rs117550412	10	121424962	0.218688	A	T	-0.000569085	0.000581598	0.327834	1453231042	-0.978486	FALSE	0	0	0	0		0	0	FALSE	0	0
BAG3	rs117590932	10	121193897	0.0467197	G	A	0.00201861	0.001033	0.0506874	1453231042	1.95412	FALSE	0	0	0	0		0	0	FALSE	0	0
BAG3	rs117600412	10	121414806	0.0328032	T	C	0.00127112	0.00116069	0.273455	1453231042	1.09514	FALSE	0	0	0	0		0	0	FALSE	0	0
BAG3	rs117967616	10	121256790	0.0248509	C	T	0.00109188	0.00149729	0.465855	1453231042	0.729241	FALSE	0	0	0	0		0	0	FALSE	0	0
BAG3	rs118013185	10	121392235	0.0238569	C	T	0.000703549	0.00159108	0.658356	1453231042	0.442184	FALSE	0	0	0	0		0	0	FALSE	0	0
BAG3	rs118062256	10	121402527	0.0318091	A	G	-0.00362769	0.00156579	0.0205122	1453231042	-2.31685	FALSE	0	0	0	0		0	0	FALSE	0	0
BAG3	rs11816089	10	121347264	0.129225	C	G	3.93597e-05	0.000690415	0.954538	1453231042	0.0570088	FALSE	0	0	0	0		0	0	FALSE	0	0
BAG3	rs12217200	10	121357196	0.199801	A	G	-0.000838845	0.00056346	0.136556	1453231042	-1.48874	FALSE	0	0	0	0		0	0	FALSE	0	0
BAG3	rs12218005	10	121247784	0.0536779	G	T	-0.000231744	0.00102939	0.821879	1453231042	-0.225128	FALSE	0	0	0	0		0	0	FALSE	0	0
BAG3	rs12219214	10	121280683	0.272366	C	T	0.000175665	0.0005123	0.731677	1453231042	0.342895	FALSE	0	0	0	0		0	0	FALSE	0	0
BAG3	rs12219225	10	121280670	0.286282	G	A	4.27858e-05	0.000509456	0.93307	1453231042	0.0839833	FALSE	0	0	0	0		0	0	FALSE	0	0
BAG3	rs12220797	10	121219503	0.208748	A	G	4.0529e-05	0.000580395	0.944329	1453231042	0.0698299	FALSE	0	0	0	0		0	0	FALSE	0	0
BAG3	rs12241957	10	121370131	0.470179	C	T	-5.0691e-05	0.000457987	0.911868	1453231042	-0.110682	FALSE	0	0	0	0		0	0	FALSE	0	0
BAG3	rs12243275	10	121180749	0.255467	G	A	0.000315628	0.000541066	0.559661	1453231042	0.583345	FALSE	0	0	0	0		0	0	FALSE	0	0
BAG3	rs12243338	10	121180858	0.280318	G	A	0.000115734	0.000522517	0.824708	1453231042	0.221494	FALSE	0	0	0	0		0	0	FALSE	0	0
BAG3	rs12243668	10	121228598	0.134195	A	G	-0.000789703	0.000728428	0.278312	1453231042	-1.08412	FALSE	0	0	0	0		0	0	FALSE	0	0
BAG3	rs12244450	10	121270779	0.0516899	C	T	-0.000342771	0.00100059	0.731922	1453231042	-0.34257	FALSE	0	0	0	0		0	0	FALSE	0	0
BAG3	rs12246119	10	121328009	0.0894632	T	C	0.000503313	0.000809718	0.534211	1453231042	0.621591	FALSE	0	0	0	0		0	0	FALSE	0	0
BAG3	rs12247834	10	121337663	0.0487078	C	A	0.000506693	0.00104074	0.626358	1453231042	0.486859	FALSE	0	0	0	0		0	0	FALSE	0	0
BAG3	rs12247940	10	121337595	0.0477137	G	A	0.000692173	0.00107551	0.519852	1453231042	0.643574	FALSE	0	0	0	0		0	0	FALSE	0	0
BAG3	rs12248409	10	121366313	0.0477137	A	G	0.0008092	0.00108403	0.455381	1453231042	0.746474	FALSE	0	0	0	0		0	0	FALSE	0	0
BAG3	rs12249702	10	121344315	0.0477137	C	T	0.000503509	0.00105844	0.634282	1453231042	0.475708	FALSE	0	0	0	0		0	0	FALSE	0	0
BAG3	rs12250770	10	121414598	0.276342	C	T	0.000952403	0.000588076	0.105335	1453231042	1.61952	FALSE	0	0	0	0		0	0	FALSE	0	0
BAG3	rs12252751	10	121352029	0.0477137	T	C	0.00071982	0.00107717	0.503974	1453231042	0.66825	FALSE	0	0	0	0		0	0	FALSE	0	0
BAG3	rs12257129	10	121357631	0.0477137	C	A	0.000666797	0.00107372	0.53459	1453231042	0.621014	FALSE	0	0	0	0		0	0	FALSE	0	0
BAG3	rs12259923	10	121258718	0.0516899	C	T	-0.000371723	0.000997389	0.709375	1453231042	-0.372696	FALSE	0	0	0	0		0	0	FALSE	0	0
BAG3	rs12260944	10	121230180	0.299205	C	T	-0.000233641	0.000566519	0.680035	1453231042	-0.412415	FALSE	0	0	0	0		0	0	FALSE	0	0
BAG3	rs12262842	10	121278072	0.233598	A	G	-0.000187014	0.000547198	0.732527	1453231042	-0.341766	FALSE	0	0	0	0		0	0	FALSE	0	0
BAG3	rs12265024	10	121301983	0.0815109	C	T	0.00126124	0.00091077	0.166112	1453231042	1.3848	FALSE	0	0	0	0		0	0	FALSE	0	0
BAG3	rs12266803	10	121397476	0.294235	C	A	-0.000493362	0.000536552	0.357831	1453231042	-0.919506	FALSE	0	0	0	0		0	0	FALSE	0	0
BAG3	rs12355718	10	121268347	0.0506958	T	G	0.000682291	0.00110914	0.538455	1453231042	0.615151	FALSE	0	0	0	0		0	0	FALSE	0	0
BAG3	rs12356865	10	121336248	0.0477137	T	C	0.000740172	0.00107784	0.492262	1453231042	0.686716	FALSE	0	0	0	0		0	0	FALSE	0	0
BAG3	rs12357556	10	121356888	0.0477137	C	T	0.0009055	0.00106087	0.393358	1453231042	0.853544	FALSE	0	0	0	0		0	0	FALSE	0	0
BAG3	rs12358294	10	121424065	0.194831	G	A	-0.000660512	0.000596084	0.267825	1453231042	-1.10809	FALSE	0	0	0	0		0	0	FALSE	0	0
BAG3	rs12412501	10	121382633	0.197813	C	T	0.000637955	0.000600583	0.288133	1453231042	1.06223	FALSE	0	0	0	0		0	0	FALSE	0	0
BAG3	rs12413642	10	121415995	0.373757	C	T	0.000805044	0.000527016	0.126624	1453231042	1.52755	FALSE	0	0	0	0		0	0	FALSE	0	0
BAG3	rs12415731	10	121236625	0.0914513	C	T	0.00101688	0.000815019	0.212151	1453231042	1.24767	FALSE	0	0	0	0		0	0	FALSE	0	0
BAG3	rs125585	10	121420554	0.373757	G	A	-0.000277	0.000472465	0.557682	1453231042	-0.586288	FALSE	0	0	0	0		0	0	FALSE	0	0
BAG3	rs12569607	10	121210393	0.22167	G	A	-0.000130499	0.0005883	0.82445	1453231042	-0.221825	FALSE	0	0	0	0		0	0	FALSE	0	0
BAG3	rs12569630	10	121362660	0.385686	A	G	0.000627933	0.000465474	0.177331	1453231042	1.34902	FALSE	0	0	0	0		0	0	FALSE	0	0
BAG3	rs12572016	10	121435524	0.252485	A	G	0.000553296	0.000538576	0.304265	1453231042	1.02733	FALSE	0	0	0	0		0	0	FALSE	0	0
BAG3	rs12721552	10	121199381	0.0367793	G	A	0.000814571	0.00110647	0.461614	1453231042	0.736191	FALSE	0	0	0	0		0	0	FALSE	0	0
BAG3	rs12721554	10	121207905	0.0477137	C	T	0.000790751	0.00108724	0.467042	1453231042	0.7273	FALSE	0	0	0	0		0	0	FALSE	0	0
BAG3	rs12766539	10	121233250	0.162028	T	A	-0.000778916	0.00071267	0.274414	1453231042	-1.09295	FALSE	0	0	0	0		0	0	FALSE	0	0
BAG3	rs12776173	10	121397584	0.0487078	G	T	-0.000241156	0.000972136	0.804081	1453231042	-0.248069	FALSE	0	0	0	0		0	0	FALSE	0	0
BAG3	rs12781277	10	121373619	0.0467197	G	C	0.00105979	0.00110459	0.337335	1453231042	0.959443	FALSE	0	0	0	0		0	0	FALSE	0	0
BAG3	rs12781479	10	121373725	0.0457256	G	A	0.00102489	0.00110549	0.353879	1453231042	0.927092	FALSE	0	0	0	0		0	0	FALSE	0	0
BAG3	rs12783252	10	121232454	0.11829	G	A	-0.000905254	0.000797981	0.256614	1453231042	-1.13443	FALSE	0	0	0	0		0	0	FALSE	0	0
BAG3	rs1316543	10	121204660	0.223658	G	A	3.24668e-05	0.000578227	0.955223	1453231042	0.0561489	FALSE	0	0	0	0		0	0	FALSE	0	0
BAG3	rs140744615	10	121394443	0.0238569	G	A	0.000344263	0.00158602	0.828161	1453231042	0.217061	FALSE	0	0	0	0		0	0	FALSE	0	0
BAG3	rs141384705	10	121396075	0.0228628	T	C	0.00106438	0.00171286	0.534333	1453231042	0.621406	FALSE	0	0	0	0		0	0	FALSE	0	0
BAG3	rs141772779	10	121289294	0.0159046	A	T	-0.00517547	0.0022497	0.021419	1453231042	-2.30052	FALSE	0	0	0	0		0	0	FALSE	0	0
BAG3	rs142479119	10	121178783	0.0258449	C	T	5.03446e-05	0.00171909	0.976637	1453231042	0.0292857	FALSE	0	0	0	0		0	0	FALSE	0	0
BAG3	rs1467813	10	121281607	0.270378	A	G	-0.000152461	0.000514772	0.767099	1453231042	-0.296171	FALSE	0	0	0	0		0	0	FALSE	0	0
BAG3	rs146911629	10	121208826	0.0198807	C	T	0.00177871	0.00160927	0.269033	1453231042	1.10529	FALSE	0	0	0	0		0	0	FALSE	0	0
BAG3	rs1475753	10	121197945	0.269384	C	A	-6.78913e-05	0.000533663	0.898768	1453231042	-0.127218	FALSE	0	0	0	0		0	0	FALSE	0	0
BAG3	rs147992014	10	121332742	0.0765408	G	A	0.000496669	0.00110202	0.652213	1453231042	0.450689	FALSE	0	0	0	0		0	0	FALSE	0	0
BAG3	rs148960146	10	121190174	0.0367793	G	A	0.000836854	0.00110785	0.450017	1453231042	0.755387	FALSE	0	0	0	0		0	0	FALSE	0	0
BAG3	rs1556591	10	121275903	0.223658	C	T	0.000349978	0.000566519	0.536727	1453231042	0.617769	FALSE	0	0	0	0		0	0	FALSE	0	0
BAG3	rs17095994	10	121181992	0.255467	A	G	0.000323481	0.000541421	0.550196	1453231042	0.597467	FALSE	0	0	0	0		0	0	FALSE	0	0
BAG3	rs17098857	10	121175674	0.180915	C	T	-0.00106315	0.000684836	0.120562	1453231042	-1.55242	FALSE	0	0	0	0		0	0	FALSE	0	0
BAG3	rs17098959	10	121274680	0.173956	G	A	-0.000670195	0.000650803	0.303106	1453231042	-1.0298	FALSE	0	0	0	0		0	0	FALSE	0	0
BAG3	rs17098973	10	121288501	0.23161	G	A	0.000119006	0.00052494	0.820654	1453231042	0.226704	FALSE	0	0	0	0		0	0	FALSE	0	0
BAG3	rs17099075	10	121362787	0.159046	G	T	-0.000908283	0.000615803	0.140224	1453231042	-1.47496	FALSE	0	0	0	0		0	0	FALSE	0	0
BAG3	rs17099080	10	121367763	0.191849	T	C	-0.000667886	0.0005764	0.246571	1453231042	-1.15872	FALSE	0	0	0	0		0	0	FALSE	0	0
BAG3	rs17099092	10	121378004	0.0487078	G	A	-0.00031342	0.000963915	0.745065	1453231042	-0.325153	FALSE	0	0	0	0		0	0	FALSE	0	0
BAG3	rs17099139	10	121419487	0.271372	C	G	-0.000223856	0.000516071	0.664455	1453231042	-0.43377	FALSE	0	0	0	0		0	0	FALSE	0	0
BAG3	rs17099142	10	121423364	0.0964215	C	T	-0.000217194	0.000815723	0.79004	1453231042	-0.266259	FALSE	0	0	0	0		0	0	FALSE	0	0
BAG3	rs171909	10	121422439	0.348907	G	A	0.000383361	0.000493194	0.43698	1453231042	0.777304	FALSE	0	0	0	0		0	0	FALSE	0	0
BAG3	rs171910	10	121425336	0.199801	A	G	0.000621371	0.000586802	0.28964	1453231042	1.05891	FALSE	0	0	0	0		0	0	FALSE	0	0
BAG3	rs17615995	10	121218335	0.158052	C	T	-0.00129334	0.000731357	0.0769932	1453231042	-1.76841	FALSE	0	0	0	0		0	0	FALSE	0	0
BAG3	rs17617337	10	121426884	0.217694	C	T	-0.000566813	0.000581566	0.329743	1453231042	-0.974632	FALSE	0	0	0	0		0	0	FALSE	0	0
BAG3	rs17678625	10	121246020	0.0516899	A	G	-0.000576627	0.00103881	0.578837	1453231042	-0.555085	FALSE	0	0	0	0		0	0	FALSE	0	0
BAG3	rs17694920	10	121387448	0.197813	A	C	0.000696642	0.000602125	0.247284	1453231042	1.15697	FALSE	0	0	0	0		0	0	FALSE	0	0
BAG3	rs185504	10	121422449	0.101392	C	T	-0.000266899	0.000728173	0.713968	1453231042	-0.366532	FALSE	0	0	0	0		0	0	FALSE	0	0
BAG3	rs1889427	10	121213068	0.0974155	A	G	0.00132196	0.000756649	0.0806162	1453231042	1.74712	FALSE	0	0	0	0		0	0	FALSE	0	0
BAG3	rs1889428	10	121213294	0.0894632	G	A	0.00128704	0.000775357	0.096928	1453231042	1.65993	FALSE	0	0	0	0		0	0	FALSE	0	0
BAG3	rs1889429	10	121213429	0.0894632	G	A	0.00128581	0.000775194	0.0971777	1453231042	1.65869	FALSE	0	0	0	0		0	0	FALSE	0	0
BAG3	rs1889430	10	121215657	0.0904573	G	A	0.00105035	0.000760869	0.167445	1453231042	1.38046	FALSE	0	0	0	0		0	0	FALSE	0	0
BAG3	rs1889431	10	121185747	0.484095	T	C	-0.000218631	0.000463481	0.63713	1453231042	-0.471716	FALSE	0	0	0	0		0	0	FALSE	0	0
BAG3	rs1889432	10	121186001	0.45825	A	G	-7.80476e-05	0.00046114	0.865601	1453231042	-0.169249	FALSE	0	0	0	0		0	0	FALSE	0	0
BAG3	rs196260	10	121386251	0.224652	T	C	0.000313912	0.000563456	0.577447	1453231042	0.557118	FALSE	0	0	0	0		0	0	FALSE	0	0
BAG3	rs196261	10	121386331	0.0874751	C	T	0.000397872	0.000801031	0.6194	1453231042	0.4967	FALSE	0	0	0	0		0	0	FALSE	0	0
BAG3	rs196262	10	121388096	0.0874751	A	G	0.000409656	0.000801526	0.609284	1453231042	0.511096	FALSE	0	0	0	0		0	0	FALSE	0	0
BAG3	rs196266	10	121389918	0.22664	A	G	0.000244	0.000559024	0.662492	1453231042	0.436476	FALSE	0	0	0	0		0	0	FALSE	0	0
BAG3	rs196267	10	121390396	0.223658	G	A	0.00294914	0.00227538	0.194938	1453231042	1.29611	FALSE	0	0	0	0		0	0	FALSE	0	0
BAG3	rs196269	10	121392633	0.234592	A	G	-3.99625e-05	0.000540619	0.941074	1453231042	-0.0739199	FALSE	0	0	0	0		0	0	FALSE	0	0
BAG3	rs196272	10	121394687	0.203777	T	C	0.000137709	0.000573955	0.810385	1453231042	0.23993	FALSE	0	0	0	0		0	0	FALSE	0	0
BAG3	rs196274	10	121396376	0.227634	T	C	0.000178305	0.000555681	0.748304	1453231042	0.320877	FALSE	0	0	0	0		0	0	FALSE	0	0
BAG3	rs196278	10	121401032	0.163022	C	T	-0.000154837	0.000643064	0.809726	1453231042	-0.240779	FALSE	0	0	0	0		0	0	FALSE	0	0
BAG3	rs196279	10	121401490	0.201789	C	T	-0.000601413	0.000594496	0.311712	1453231042	-1.01164	FALSE	0	0	0	0		0	0	FALSE	0	0
BAG3	rs196280	10	121402602	0.202783	T	C	-0.000618265	0.000595284	0.298988	1453231042	-1.03861	FALSE	0	0	0	0		0	0	FALSE	0	0
BAG3	rs196281	10	121402859	0.23161	G	A	-0.00020304	0.00054873	0.711369	1453231042	-0.370018	FALSE	0	0	0	0		0	0	FALSE	0	0
BAG3	rs196283	10	121403034	0.23161	T	G	-0.000208155	0.000548762	0.704452	1453231042	-0.379317	FALSE	0	0	0	0		0	0	FALSE	0	0
BAG3	rs196284	10	121404256	0.202783	A	G	-0.000575213	0.000596802	0.335133	1453231042	-0.963825	FALSE	0	0	0	0		0	0	FALSE	0	0
BAG3	rs196290	10	121408071	0.478131	T	C	-0.000264313	0.000466996	0.571403	1453231042	-0.565986	FALSE	0	0	0	0		0	0	FALSE	0	0
BAG3	rs196292	10	121408482	0.479125	A	G	-0.000255518	0.000469998	0.586677	1453231042	-0.543658	FALSE	0	0	0	0		0	0	FALSE	0	0
BAG3	rs196295	10	121436362	0.198807	A	G	0.000618381	0.0005875	0.292541	1453231042	1.05256	FALSE	0	0	0	0		0	0	FALSE	0	0
BAG3	rs196298	10	121439274	0.303181	G	A	-5.41975e-05	0.000493813	0.912605	1453231042	-0.109753	FALSE	0	0	0	0		0	0	FALSE	0	0
BAG3	rs196299	10	121439538	0.27336	T	G	-0.00111061	0.000602659	0.0653508	1453231042	-1.84285	FALSE	0	0	0	0		0	0	FALSE	0	0
BAG3	rs196300	10	121440943	0.290258	T	C	-0.000866871	0.000566278	0.125813	1453231042	-1.53082	FALSE	0	0	0	0		0	0	FALSE	0	0
BAG3	rs196305	10	121377463	0.181909	G	C	0.00312572	0.00265417	0.23893	1453231042	1.17766	FALSE	0	0	0	0		0	0	FALSE	0	0
BAG3	rs196307	10	121379389	0.159046	C	T	-8.66163e-05	0.00064008	0.892358	1453231042	-0.135321	FALSE	0	0	0	0		0	0	FALSE	0	0
BAG3	rs196308	10	121379436	0.494036	A	G	0.000111061	0.000470181	0.813271	1453231042	0.236209	FALSE	0	0	0	0		0	0	FALSE	0	0
BAG3	rs196309	10	121379764	0.494036	A	G	-5.05725e-05	0.000458799	0.912229	1453231042	-0.110228	FALSE	0	0	0	0		0	0	FALSE	0	0
BAG3	rs196310	10	121381615	0.457256	A	G	2.53484e-05	0.000460195	0.956073	1453231042	0.0550817	FALSE	0	0	0	0		0	0	FALSE	0	0
BAG3	rs196311	10	121382552	0.49503	A	G	-4.72854e-05	0.000462264	0.918526	1453231042	-0.102291	FALSE	0	0	0	0		0	0	FALSE	0	0
BAG3	rs196312	10	121382723	0.175944	G	A	0.00038749	0.000631028	0.539175	1453231042	0.614062	FALSE	0	0	0	0		0	0	FALSE	0	0
BAG3	rs196313	10	121383036	0.153082	G	A	0.000303274	0.00066512	0.648413	1453231042	0.455969	FALSE	0	0	0	0		0	0	FALSE	0	0
BAG3	rs196314	10	121383417	0.153082	C	T	0.000331319	0.000666854	0.619303	1453231042	0.496839	FALSE	0	0	0	0		0	0	FALSE	0	0
BAG3	rs196315	10	121383691	0.153082	C	T	0.00031272	0.000665635	0.638493	1453231042	0.469806	FALSE	0	0	0	0		0	0	FALSE	0	0
BAG3	rs196316	10	121423759	0.252485	A	C	0.000575477	0.000534265	0.281418	1453231042	1.07714	FALSE	0	0	0	0		0	0	FALSE	0	0
BAG3	rs196318	10	121425502	0.372763	C	T	-0.00026894	0.000472046	0.56886	1453231042	-0.569732	FALSE	0	0	0	0		0	0	FALSE	0	0
BAG3	rs196320	10	121426216	0.252485	A	G	0.000572519	0.000534214	0.283853	1453231042	1.0717	FALSE	0	0	0	0		0	0	FALSE	0	0
BAG3	rs196321	10	121427109	0.252485	C	T	0.000571026	0.00053546	0.286234	1453231042	1.06642	FALSE	0	0	0	0		0	0	FALSE	0	0
BAG3	rs196322	10	121427518	0.252485	G	A	0.000638791	0.000538994	0.235957	1453231042	1.18515	FALSE	0	0	0	0		0	0	FALSE	0	0
BAG3	rs196323	10	121427955	0.244533	T	C	0.000418418	0.000535687	0.434752	1453231042	0.781086	FALSE	0	0	0	0		0	0	FALSE	0	0
BAG3	rs196324	10	121428425	0.082505	G	A	-8.62365e-05	0.000788642	0.912926	1453231042	-0.109348	FALSE	0	0	0	0		0	0	FALSE	0	0
BAG3	rs196325	10	121428828	0.400596	A	G	0.000299922	0.000481402	0.533272	1453231042	0.623018	FALSE	0	0	0	0		0	0	FALSE	0	0
BAG3	rs196326	10	121429762	0.199801	C	G	0.000649183	0.000590235	0.271388	1453231042	1.09987	FALSE	0	0	0	0		0	0	FALSE	0	0
BAG3	rs196327	10	121429842	0.347913	A	G	0.00060143	0.000504951	0.233627	1453231042	1.19107	FALSE	0	0	0	0		0	0	FALSE	0	0
BAG3	rs196328	10	121432371	0.348907	G	A	0.000586538	0.000503548	0.244096	1453231042	1.16481	FALSE	0	0	0	0		0	0	FALSE	0	0
BAG3	rs196329	10	121432553	0.199801	A	G	0.000624399	0.000588197	0.288441	1453231042	1.06155	FALSE	0	0	0	0		0	0	FALSE	0	0
BAG3	rs196330	10	121432577	0.348907	A	G	0.000594072	0.000504285	0.238777	1453231042	1.17805	FALSE	0	0	0	0		0	0	FALSE	0	0
BAG3	rs196331	10	121433341	0.348907	G	T	0.000585615	0.00207854	0.778141	1453231042	0.281743	FALSE	0	0	0	0		0	0	FALSE	0	0
BAG3	rs196332	10	121433660	0.199801	A	G	0.000641941	0.000586061	0.273364	1453231042	1.09535	FALSE	0	0	0	0		0	0	FALSE	0	0
BAG3	rs196333	10	121433961	0.348907	C	T	0.000586422	0.000503538	0.24418	1453231042	1.1646	FALSE	0	0	0	0		0	0	FALSE	0	0
BAG3	rs196334	10	121434052	0.348907	C	T	0.000587331	0.000503552	0.243462	1453231042	1.16638	FALSE	0	0	0	0		0	0	FALSE	0	0
BAG3	rs196336	10	121414236	0.348907	T	C	0.000495237	0.000508732	0.330318	1453231042	0.973473	FALSE	0	0	0	0		0	0	FALSE	0	0
BAG3	rs196337	10	121414702	0.101392	C	T	-0.0002509	0.000751441	0.738461	1453231042	-0.333892	FALSE	0	0	0	0		0	0	FALSE	0	0
BAG3	rs196338	10	121415949	0.0795229	G	A	-7.0999e-05	0.000816552	0.930711	1453231042	-0.0869498	FALSE	0	0	0	0		0	0	FALSE	0	0
BAG3	rs196339	10	121416015	0.101392	C	T	-0.000266956	0.000739721	0.718184	1453231042	-0.360887	FALSE	0	0	0	0		0	0	FALSE	0	0
BAG3	rs196340	10	121416240	0.101392	C	T	-0.000271249	0.000736028	0.712478	1453231042	-0.368531	FALSE	0	0	0	0		0	0	FALSE	0	0
BAG3	rs196341	10	121416611	0.252485	T	C	0.000544674	0.000532458	0.306335	1453231042	1.02294	FALSE	0	0	0	0		0	0	FALSE	0	0
BAG3	rs196342	10	121417358	0.101392	A	G	-0.000273716	0.000728544	0.707138	1453231042	-0.375703	FALSE	0	0	0	0		0	0	FALSE	0	0
BAG3	rs196343	10	121417957	0.199801	A	G	0.000612438	0.000586646	0.296502	1453231042	1.04396	FALSE	0	0	0	0		0	0	FALSE	0	0
BAG3	rs196344	10	121419309	0.252485	T	A	0.000548686	0.000532805	0.303101	1453231042	1.02981	FALSE	0	0	0	0		0	0	FALSE	0	0
BAG3	rs196345	10	121420922	0.372763	G	A	-0.000304796	0.000473359	0.51964	1453231042	-0.6439	FALSE	0	0	0	0		0	0	FALSE	0	0
BAG3	rs1974210	10	121278684	0.300199	T	C	-8.86612e-05	0.000507707	0.86137	1453231042	-0.174631	FALSE	0	0	0	0		0	0	FALSE	0	0
BAG3	rs1999627	10	121216923	0.0894632	G	A	0.000866743	0.000750175	0.247932	1453231042	1.15539	FALSE	0	0	0	0		0	0	FALSE	0	0
BAG3	rs1999628	10	121217061	0.0894632	T	A	0.000813793	0.00074768	0.276408	1453231042	1.08842	FALSE	0	0	0	0		0	0	FALSE	0	0
BAG3	rs2012340	10	121192492	0.494036	A	G	-7.04451e-06	0.000464553	0.987901	1453231042	-0.0151641	FALSE	0	0	0	0		0	0	FALSE	0	0
BAG3	rs2014999	10	121287641	0.23161	C	A	0.00010487	0.00052838	0.842673	1453231042	0.198475	FALSE	0	0	0	0		0	0	FALSE	0	0
BAG3	rs2039486	10	121240495	0.079523	C	G	-0.00150114	0.000878318	0.0874307	1453231042	-1.70911	FALSE	0	0	0	0		0	0	FALSE	0	0
BAG3	rs2039487	10	121240540	0.313121	C	T	0.000105174	0.000563506	0.851941	1453231042	0.186642	FALSE	0	0	0	0		0	0	FALSE	0	0
BAG3	rs2039488	10	121244739	0.0874751	T	C	6.24041e-05	0.000828197	0.939937	1453231042	0.0753494	FALSE	0	0	0	0		0	0	FALSE	0	0
BAG3	rs2039489	10	121234567	0.405567	T	C	-0.000468945	0.000486302	0.334891	1453231042	-0.964309	FALSE	0	0	0	0		0	0	FALSE	0	0
BAG3	rs2069142	10	121342387	0.0407555	C	A	-6.90845e-05	0.00114286	0.951798	1453231042	-0.0604488	FALSE	0	0	0	0		0	0	FALSE	0	0
BAG3	rs2072361	10	121432440	0.0964215	C	A	-0.00132604	0.00351651	0.706107	1453231042	-0.377089	FALSE	0	0	0	0		0	0	FALSE	0	0
BAG3	rs2104992	10	121232730	0.39662	C	G	-0.000450564	0.000484787	0.352678	1453231042	-0.929407	FALSE	0	0	0	0		0	0	FALSE	0	0
BAG3	rs2151872	10	121234291	0.32008	G	A	-0.00117844	0.000587084	0.0447208	1453231042	-2.00727	FALSE	0	0	0	0		0	0	FALSE	0	0
BAG3	rs2230349	10	121196335	0.0755467	G	A	0.0012165	0.000800162	0.128431	1453231042	1.52032	FALSE	0	0	0	0		0	0	FALSE	0	0
BAG3	rs2234962	10	121429633	0.218688	T	C	-0.000540842	0.000576518	0.348183	1453231042	-0.938119	FALSE	0	0	0	0		0	0	FALSE	0	0
BAG3	rs2240777	10	121429256	0.0984095	A	G	-0.00136987	0.00349834	0.69537	1453231042	-0.391578	FALSE	0	0	0	0		0	0	FALSE	0	0
BAG3	rs2245364	10	121199189	0.075547	T	C	-0.00118316	0.000798204	0.138267	1453231042	-1.48227	FALSE	0	0	0	0		0	0	FALSE	0	0
BAG3	rs2275040	10	121196062	0.472167	C	T	2.05294e-05	0.000461306	0.964504	1453231042	0.0445028	FALSE	0	0	0	0		0	0	FALSE	0	0
BAG3	rs2275043	10	121201616	0.159046	C	T	-0.00157512	0.000771866	0.0412849	1453231042	-2.04066	FALSE	0	0	0	0		0	0	FALSE	0	0
BAG3	rs2275044	10	121201626	0.159046	T	C	0.00159253	0.00077413	0.0396679	1453231042	2.05719	FALSE	0	0	0	0		0	0	FALSE	0	0
BAG3	rs2297640	10	121212373	0.0904573	G	A	0.001185	0.00076452	0.121143	1453231042	1.54999	FALSE	0	0	0	0		0	0	FALSE	0	0
BAG3	rs2297641	10	121212405	0.0894632	C	T	0.0012998	0.000775915	0.0938981	1453231042	1.67518	FALSE	0	0	0	0		0	0	FALSE	0	0
BAG3	rs2301181	10	121286692	0.0596421	A	G	-0.000381715	0.00100948	0.705335	1453231042	-0.378129	FALSE	0	0	0	0		0	0	FALSE	0	0
BAG3	rs2420621	10	121193871	0.496024	A	G	5.70978e-05	0.000461839	0.901607	1453231042	0.123631	FALSE	0	0	0	0		0	0	FALSE	0	0
BAG3	rs2420622	10	121215348	0.0596421	C	A	0.00166928	0.000940038	0.0757734	1453231042	1.77575	FALSE	0	0	0	0		0	0	FALSE	0	0
BAG3	rs2420626	10	121251176	0.270378	C	T	-0.000474125	0.000557906	0.39542	1453231042	-0.84983	FALSE	0	0	0	0		0	0	FALSE	0	0
BAG3	rs2420630	10	121278342	0.312127	A	G	0.000375023	0.000516217	0.467542	1453231042	0.726484	FALSE	0	0	0	0		0	0	FALSE	0	0
BAG3	rs2420636	10	121369394	0.469185	G	A	-2.41975e-05	0.000458777	0.957936	1453231042	-0.0527436	FALSE	0	0	0	0		0	0	FALSE	0	0
BAG3	rs2420637	10	121356658	0.199801	G	A	-0.000821585	0.000564832	0.14579	1453231042	-1.45456	FALSE	0	0	0	0		0	0	FALSE	0	0
BAG3	rs2420639	10	121373666	0.499006	G	A	-9.18685e-05	0.000461945	0.842362	1453231042	-0.198873	FALSE	0	0	0	0		0	0	FALSE	0	0
BAG3	rs2420641	10	121410026	0.263419	G	A	0.00029192	0.000516444	0.571904	1453231042	0.565249	FALSE	0	0	0	0		0	0	FALSE	0	0
BAG3	rs2478804	10	121422124	0.101392	C	T	-0.000260309	0.000728061	0.720689	1453231042	-0.357538	FALSE	0	0	0	0		0	0	FALSE	0	0
BAG3	rs2577333	10	121373944	0.498012	A	G	-8.28638e-05	0.00046141	0.857476	1453231042	-0.179588	FALSE	0	0	0	0		0	0	FALSE	0	0
BAG3	rs2577334	10	121374280	0.184891	T	C	0.000310006	0.000619882	0.617002	1453231042	0.500104	FALSE	0	0	0	0		0	0	FALSE	0	0
BAG3	rs2577335	10	121375181	0.279324	A	G	0.000456627	0.00053874	0.39667	1453231042	0.847584	FALSE	0	0	0	0		0	0	FALSE	0	0
BAG3	rs2577338	10	121421684	0.252485	T	C	0.000608346	0.000534066	0.254669	1453231042	1.13908	FALSE	0	0	0	0		0	0	FALSE	0	0
BAG3	rs2577339	10	121422482	0.372763	G	A	-0.000326951	0.000477177	0.493232	1453231042	-0.685177	FALSE	0	0	0	0		0	0	FALSE	0	0
BAG3	rs2577340	10	121425186	0.252485	T	C	0.000560279	0.000533592	0.293711	1453231042	1.05001	FALSE	0	0	0	0		0	0	FALSE	0	0
BAG3	rs28449191	10	121279386	0.0666004	C	G	-0.00376605	0.00391789	0.33643	1453231042	-0.961243	FALSE	0	0	0	0		0	0	FALSE	0	0
BAG3	rs28558725	10	121438874	0.272366	A	G	0.000965109	0.000590218	0.102013	1453231042	1.63517	FALSE	0	0	0	0		0	0	FALSE	0	0
BAG3	rs28622012	10	121376024	0.304175	G	A	-0.000371235	0.000529963	0.48362	1453231042	-0.700491	FALSE	0	0	0	0		0	0	FALSE	0	0
BAG3	rs28652753	10	121357265	0.175944	A	G	0.000332195	0.000610312	0.586233	1453231042	0.544302	FALSE	0	0	0	0		0	0	FALSE	0	0
BAG3	rs29001632	10	121250868	0.0685885	G	A	-0.000118595	0.00101602	0.907077	1453231042	-0.116726	FALSE	0	0	0	0		0	0	FALSE	0	0
BAG3	rs2901212	10	121226447	0.214712	A	G	0.000196812	0.000568729	0.7293	1453231042	0.346056	FALSE	0	0	0	0		0	0	FALSE	0	0
BAG3	rs2901213	10	121281362	0.077535	T	C	0.000375259	0.000838418	0.654456	1453231042	0.44758	FALSE	0	0	0	0		0	0	FALSE	0	0
BAG3	rs2917925	10	121321322	0.2833	T	C	-0.000304331	0.000492635	0.536732	1453231042	-0.617763	FALSE	0	0	0	0		0	0	FALSE	0	0
BAG3	rs2917928	10	121315890	0.284294	A	G	-0.000333969	0.000485017	0.491093	1453231042	-0.688571	FALSE	0	0	0	0		0	0	FALSE	0	0
BAG3	rs2917929	10	121300515	0.0974155	T	A	-9.13562e-05	0.000832907	0.91266	1453231042	-0.109684	FALSE	0	0	0	0		0	0	FALSE	0	0
BAG3	rs2917934	10	121310068	0.270378	T	C	0.000436308	0.000520727	0.402097	1453231042	0.837882	FALSE	0	0	0	0		0	0	FALSE	0	0
BAG3	rs2917936	10	121310498	0.327038	T	C	-5.94622e-05	0.000498287	0.905011	1453231042	-0.119333	FALSE	0	0	0	0		0	0	FALSE	0	0
BAG3	rs2917939	10	121313621	0.284294	G	A	0.00134807	0.0020988	0.520676	1453231042	0.642303	FALSE	0	0	0	0		0	0	FALSE	0	0
BAG3	rs2917941	10	121328421	0.300199	A	T	-0.000360665	0.000476984	0.449568	1453231042	-0.756136	FALSE	0	0	0	0		0	0	FALSE	0	0
BAG3	rs2991769	10	121231439	0.315109	A	G	-0.00112141	0.000578078	0.0523933	1453231042	-1.93989	FALSE	0	0	0	0		0	0	FALSE	0	0
BAG3	rs2991771	10	121235689	0.335984	A	G	-0.00105833	0.000568567	0.062687	1453231042	-1.8614	FALSE	0	0	0	0		0	0	FALSE	0	0
BAG3	rs2991772	10	121248096	0.219682	G	A	-0.000347906	0.000585625	0.552461	1453231042	-0.594077	FALSE	0	0	0	0		0	0	FALSE	0	0
BAG3	rs2991773	10	121249131	0.207753	C	T	-0.00040045	0.000600428	0.50481	1453231042	-0.66694	FALSE	0	0	0	0		0	0	FALSE	0	0
BAG3	rs2991777	10	121261166	0.0437376	C	G	-0.00314702	0.00480214	0.512251	1453231042	-0.655337	FALSE	0	0	0	0		0	0	FALSE	0	0
BAG3	rs2991788	10	121286420	0.498012	T	G	0.000298578	0.000472804	0.52771	1453231042	0.631505	FALSE	0	0	0	0		0	0	FALSE	0	0
BAG3	rs3009873	10	121224208	0.397614	G	A	0.000136206	0.000478382	0.775856	1453231042	0.284723	FALSE	0	0	0	0		0	0	FALSE	0	0
BAG3	rs3009874	10	121225352	0.392644	G	A	0.000139931	0.000474834	0.768227	1453231042	0.294695	FALSE	0	0	0	0		0	0	FALSE	0	0
BAG3	rs3009877	10	121328495	0.300199	G	A	-0.000362691	0.000480264	0.450135	1453231042	-0.755191	FALSE	0	0	0	0		0	0	FALSE	0	0
BAG3	rs3009879	10	121338507	0.374751	C	T	-0.000426964	0.000464429	0.357923	1453231042	-0.919331	FALSE	0	0	0	0		0	0	FALSE	0	0
BAG3	rs3009880	10	121229034	0.213718	T	C	-0.000121062	0.000570176	0.831855	1453231042	-0.212324	FALSE	0	0	0	0		0	0	FALSE	0	0
BAG3	rs3009883	10	121230621	0.398608	T	C	1.02273e-06	4.8287e-05	0.983102	1453231042	0.0211802	FALSE	0	0	0	0		0	0	FALSE	0	0
BAG3	rs3009884	10	121233891	0.32008	A	G	-0.00120584	0.000590482	0.0411383	1453231042	-2.04213	FALSE	0	0	0	0		0	0	FALSE	0	0
BAG3	rs3009885	10	121234734	0.32008	C	T	-0.00118756	0.000588119	0.0434608	1453231042	-2.01925	FALSE	0	0	0	0		0	0	FALSE	0	0
BAG3	rs3009886	10	121234812	0.32008	C	T	-0.00118422	0.000587491	0.0438295	1453231042	-2.01572	FALSE	0	0	0	0		0	0	FALSE	0	0
BAG3	rs3009887	10	121240253	0.284294	T	A	-0.00112736	0.000600812	0.060602	1453231042	-1.87639	FALSE	0	0	0	0		0	0	FALSE	0	0
BAG3	rs3009888	10	121248309	0.219682	C	T	-0.00035348	0.000585832	0.546256	1453231042	-0.60338	FALSE	0	0	0	0		0	0	FALSE	0	0
BAG3	rs3009890	10	121248731	0.2167	C	T	-0.000287176	0.000583296	0.622483	1453231042	-0.492334	FALSE	0	0	0	0		0	0	FALSE	0	0
BAG3	rs3009891	10	121249126	0.132207	G	A	-0.000541554	0.000738249	0.463213	1453231042	-0.733566	FALSE	0	0	0	0		0	0	FALSE	0	0
BAG3	rs3009892	10	121249171	0.234592	G	A	-0.000243024	0.000559027	0.663761	1453231042	-0.434727	FALSE	0	0	0	0		0	0	FALSE	0	0
BAG3	rs3009903	10	121261064	0.107356	G	A	-0.000120172	0.00077456	0.876704	1453231042	-0.155149	FALSE	0	0	0	0		0	0	FALSE	0	0
BAG3	rs3009907	10	121262454	0.0944334	G	T	0.000433345	0.000800576	0.588307	1453231042	0.541292	FALSE	0	0	0	0		0	0	FALSE	0	0
BAG3	rs3009908	10	121262900	0.0944334	T	C	0.000440092	0.00080075	0.582594	1453231042	0.549599	FALSE	0	0	0	0		0	0	FALSE	0	0
BAG3	rs3009917	10	121281472	0.048708	G	A	-0.000783672	0.00102631	0.445117	1453231042	-0.763581	FALSE	0	0	0	0		0	0	FALSE	0	0
BAG3	rs3009919	10	121284166	0.0944334	C	T	-0.000283538	0.000846594	0.737688	1453231042	-0.334916	FALSE	0	0	0	0		0	0	FALSE	0	0
BAG3	rs3009920	10	121221218	0.388668	G	A	0.000121049	0.000478929	0.800462	1453231042	0.25275	FALSE	0	0	0	0		0	0	FALSE	0	0
BAG3	rs3009926	10	121304964	0.078529	C	T	0.000367877	0.000887988	0.678668	1453231042	0.414281	FALSE	0	0	0	0		0	0	FALSE	0	0
BAG3	rs3009927	10	121306466	0.078529	G	A	0.0003528	0.000891243	0.692214	1453231042	0.395852	FALSE	0	0	0	0		0	0	FALSE	0	0
BAG3	rs3009928	10	121307322	0.081511	A	G	0.000176601	0.000811389	0.8277	1453231042	0.217652	FALSE	0	0	0	0		0	0	FALSE	0	0
BAG3	rs34018472	10	121281537	0.0308151	G	A	0.00050464	0.00138377	0.715347	1453231042	0.364685	FALSE	0	0	0	0		0	0	FALSE	0	0
BAG3	rs34088341	10	121391815	0.0487078	G	A	0.00143951	0.00112171	0.199378	1453231042	1.28333	FALSE	0	0	0	0		0	0	FALSE	0	0
BAG3	rs34119899	10	121258836	0.0636183	C	T	-0.000457868	0.00104447	0.661115	1453231042	-0.438374	FALSE	0	0	0	0		0	0	FALSE	0	0
BAG3	rs34135944	10	121407628	0.0487078	A	G	-0.000153801	0.00102592	0.880831	1453231042	-0.149915	FALSE	0	0	0	0		0	0	FALSE	0	0
BAG3	rs34509437	10	121365565	0.0467197	G	A	0.000769161	0.00108242	0.477336	1453231042	0.710595	FALSE	0	0	0	0		0	0	FALSE	0	0
BAG3	rs34567439	10	121383119	0.197813	T	G	0.000640462	0.000600751	0.286377	1453231042	1.0661	FALSE	0	0	0	0		0	0	FALSE	0	0
BAG3	rs34884447	10	121220138	0.0248509	C	T	-0.00202423	0.00187038	0.279139	1453231042	-1.08225	FALSE	0	0	0	0		0	0	FALSE	0	0
BAG3	rs34966089	10	121408865	0.0497018	C	T	-0.000275172	0.00102447	0.788239	1453231042	-0.268598	FALSE	0	0	0	0		0	0	FALSE	0	0
BAG3	rs35188721	10	121433307	0.0984095	A	G	-0.000212895	0.000815654	0.794084	1453231042	-0.261011	FALSE	0	0	0	0		0	0	FALSE	0	0
BAG3	rs35327025	10	121256750	0.0506958	C	T	0.000577451	0.00110701	0.601926	1453231042	0.521633	FALSE	0	0	0	0		0	0	FALSE	0	0
BAG3	rs35434411	10	121429394	0.026839	G	A	0.000418028	0.00129405	0.746667	1453231042	0.323038	FALSE	0	0	0	0		0	0	FALSE	0	0
BAG3	rs35600085	10	121440473	0.0526839	A	G	-0.000543342	0.00100265	0.587883	1453231042	-0.541907	FALSE	0	0	0	0		0	0	FALSE	0	0
BAG3	rs35705342	10	121379328	0.0487078	G	A	-3.10203e-05	0.00095554	0.974102	1453231042	-0.0324636	FALSE	0	0	0	0		0	0	FALSE	0	0
BAG3	rs36097989	10	121240493	0.0884692	T	C	-0.000921215	0.000909573	0.311156	1453231042	-1.0128	FALSE	0	0	0	0		0	0	FALSE	0	0
BAG3	rs3758611	10	121407981	0.0477137	T	C	-0.000152697	0.00103466	0.882673	1453231042	-0.147582	FALSE	0	0	0	0		0	0	FALSE	0	0
BAG3	rs3808954	10	121297851	0.104374	C	T	0.000154549	0.000803587	0.847488	1453231042	0.192324	FALSE	0	0	0	0		0	0	FALSE	0	0
BAG3	rs3816145	10	121347329	0.196819	T	C	-0.000774283	0.000563734	0.1696	1453231042	-1.37349	FALSE	0	0	0	0		0	0	FALSE	0	0
BAG3	rs3824827	10	121204382	0.0755467	C	G	0.0012042	0.000800916	0.132701	1453231042	1.50353	FALSE	0	0	0	0		0	0	FALSE	0	0
BAG3	rs3847485	10	121373622	0.0477137	A	G	-0.000223243	0.000972579	0.818451	1453231042	-0.229537	FALSE	0	0	0	0		0	0	FALSE	0	0
BAG3	rs3847487	10	121378493	0.275348	C	T	-3.91903e-05	0.000493217	0.936668	1453231042	-0.0794585	FALSE	0	0	0	0		0	0	FALSE	0	0
BAG3	rs3847488	10	121388960	0.27336	A	T	-4.73646e-05	0.000494138	0.923637	1453231042	-0.0958529	FALSE	0	0	0	0		0	0	FALSE	0	0
BAG3	rs3847489	10	121417338	0.373757	T	G	0.000779142	0.000515313	0.130539	1453231042	1.51198	FALSE	0	0	0	0		0	0	FALSE	0	0
BAG3	rs3847490	10	121440503	0.32008	G	T	-0.000715894	0.00052618	0.173656	1453231042	-1.36055	FALSE	0	0	0	0		0	0	FALSE	0	0
BAG3	rs3858339	10	121436068	0.0964215	T	G	-0.000405077	0.000826569	0.624084	1453231042	-0.49007	FALSE	0	0	0	0		0	0	FALSE	0	0
BAG3	rs3858340	10	121436286	0.0964215	C	T	-0.00139809	0.00352179	0.69138	1453231042	-0.396983	FALSE	0	0	0	0		0	0	FALSE	0	0
BAG3	rs3892668	10	121432924	0.272366	C	T	0.00102181	0.000588655	0.0825914	1453231042	1.73584	FALSE	0	0	0	0		0	0	FALSE	0	0
BAG3	rs3892879	10	121420860	0.277336	G	A	0.00102658	0.000583448	0.0784927	1453231042	1.7595	FALSE	0	0	0	0		0	0	FALSE	0	0
BAG3	rs41310304	10	121276186	0.173956	G	A	-0.000713169	0.000650957	0.273267	1453231042	-1.09557	FALSE	0	0	0	0		0	0	FALSE	0	0
BAG3	rs41402548	10	121387106	0.0457256	G	A	0.00152199	0.00160793	0.343867	1453231042	0.946552	FALSE	0	0	0	0		0	0	FALSE	0	0
BAG3	rs4751718	10	121176693	0.180915	T	A	-0.0010759	0.000686764	0.117204	1453231042	-1.56662	FALSE	0	0	0	0		0	0	FALSE	0	0
BAG3	rs4751719	10	121220708	0.382704	A	C	-2.89591e-05	0.000478004	0.951691	1453231042	-0.0605833	FALSE	0	0	0	0		0	0	FALSE	0	0
BAG3	rs4751720	10	121222034	0.387674	A	G	-3.84913e-05	0.000477729	0.935783	1453231042	-0.0805715	FALSE	0	0	0	0		0	0	FALSE	0	0
BAG3	rs4751721	10	121237542	0.0795229	C	T	0.00151141	0.000879479	0.0857	1453231042	1.71853	FALSE	0	0	0	0		0	0	FALSE	0	0
BAG3	rs4751722	10	121237673	0.0795229	T	C	0.00152555	0.00088071	0.0832408	1453231042	1.73218	FALSE	0	0	0	0		0	0	FALSE	0	0
BAG3	rs4751723	10	121238942	0.0795229	G	A	0.00160614	0.000888925	0.0707884	1453231042	1.80683	FALSE	0	0	0	0		0	0	FALSE	0	0
BAG3	rs4751725	10	121239137	0.0795229	T	C	0.00146753	0.000875402	0.0936587	1453231042	1.67641	FALSE	0	0	0	0		0	0	FALSE	0	0
BAG3	rs4751726	10	121239460	0.0795229	A	G	0.00150124	0.000878316	0.087409	1453231042	1.70923	FALSE	0	0	0	0		0	0	FALSE	0	0
BAG3	rs4751727	10	121239473	0.0795229	C	G	0.00150493	0.000878047	0.0865383	1453231042	1.71395	FALSE	0	0	0	0		0	0	FALSE	0	0
BAG3	rs4751728	10	121239553	0.0795229	G	A	0.00127095	0.00338205	0.70707	1453231042	0.375794	FALSE	0	0	0	0		0	0	FALSE	0	0
BAG3	rs4751729	10	121239574	0.0795229	C	T	0.00148364	0.00087569	0.090218	1453231042	1.69425	FALSE	0	0	0	0		0	0	FALSE	0	0
BAG3	rs4751731	10	121243198	0.0795229	G	A	0.00145403	0.000874532	0.0963855	1453231042	1.66264	FALSE	0	0	0	0		0	0	FALSE	0	0
BAG3	rs4751732	10	121243414	0.0815109	C	T	0.00147256	0.000878427	0.0936671	1453231042	1.67636	FALSE	0	0	0	0		0	0	FALSE	0	0
BAG3	rs4751733	10	121255028	0.0516899	A	T	-0.000390058	0.000994515	0.694903	1453231042	-0.39221	FALSE	0	0	0	0		0	0	FALSE	0	0
BAG3	rs4751734	10	121264927	0.11332	T	C	-1.08878e-05	0.000736236	0.988201	1453231042	-0.0147884	FALSE	0	0	0	0		0	0	FALSE	0	0
BAG3	rs4751739	10	121321928	0.0894632	A	G	0.000479999	0.000810784	0.553838	1453231042	0.592019	FALSE	0	0	0	0		0	0	FALSE	0	0
BAG3	rs4751740	10	121322091	0.0894632	A	G	0.000470499	0.000807418	0.560082	1453231042	0.58272	FALSE	0	0	0	0		0	0	FALSE	0	0
BAG3	rs4751741	10	121322445	0.2833	A	G	-0.000368249	0.000485429	0.44809	1453231042	-0.758604	FALSE	0	0	0	0		0	0	FALSE	0	0
BAG3	rs4751747	10	121358993	0.0417495	C	A	0.000588067	0.00111099	0.596585	1453231042	0.529318	FALSE	0	0	0	0		0	0	FALSE	0	0
BAG3	rs4751749	10	121359218	0.0477137	C	T	0.000672667	0.00107333	0.53085	1453231042	0.626708	FALSE	0	0	0	0		0	0	FALSE	0	0
BAG3	rs4752302	10	121173828	0.178926	C	T	-0.00104656	0.000687515	0.127951	1453231042	-1.52223	FALSE	0	0	0	0		0	0	FALSE	0	0
BAG3	rs4752303	10	121176335	0.464215	A	G	-2.31995e-07	3.92127e-05	0.995279	1453231042	-0.00591632	FALSE	0	0	0	0		0	0	FALSE	0	0
BAG3	rs4752304	10	121176543	0.45825	C	T	-0.000190317	0.000465438	0.682615	1453231042	-0.408898	FALSE	0	0	0	0		0	0	FALSE	0	0
BAG3	rs4752305	10	121176601	0.463221	T	C	0.000121129	0.000461852	0.793115	1453231042	0.262268	FALSE	0	0	0	0		0	0	FALSE	0	0
BAG3	rs4752306	10	121181627	0.260437	T	G	-1.82684e-05	0.00053346	0.972682	1453231042	-0.0342451	FALSE	0	0	0	0		0	0	FALSE	0	0
BAG3	rs4752307	10	121182409	0.280318	G	A	-0.00143254	0.00223573	0.521685	1453231042	-0.64075	FALSE	0	0	0	0		0	0	FALSE	0	0
BAG3	rs4752308	10	121184828	0.485089	T	C	-0.000270563	0.000464912	0.560589	1453231042	-0.581967	FALSE	0	0	0	0		0	0	FALSE	0	0
BAG3	rs4752311	10	121200320	0.0994036	C	T	-0.00163334	0.000945118	0.0839556	1453231042	-1.72818	FALSE	0	0	0	0		0	0	FALSE	0	0
BAG3	rs4752313	10	121235040	0.0795229	C	T	0.0015903	0.00089093	0.0742635	1453231042	1.78499	FALSE	0	0	0	0		0	0	FALSE	0	0
BAG3	rs4752314	10	121243836	0.0815109	G	C	0.00156274	0.000899075	0.0821817	1453231042	1.73817	FALSE	0	0	0	0		0	0	FALSE	0	0
BAG3	rs4752315	10	121249516	0.201789	C	T	-0.000320088	0.00060684	0.59787	1453231042	-0.527466	FALSE	0	0	0	0		0	0	FALSE	0	0
BAG3	rs4752317	10	121264341	0.102386	C	A	-0.000542662	0.000763328	0.477136	1453231042	-0.710916	FALSE	0	0	0	0		0	0	FALSE	0	0
BAG3	rs4752318	10	121267747	0.0497018	G	A	0.000554615	0.0010144	0.584557	1453231042	0.546741	FALSE	0	0	0	0		0	0	FALSE	0	0
BAG3	rs4752320	10	121275537	0.0497018	A	G	0.000598949	0.00101699	0.555898	1453231042	0.588945	FALSE	0	0	0	0		0	0	FALSE	0	0
BAG3	rs4752321	10	121277598	0.26839	G	C	-1.79006e-05	0.000520811	0.972582	1453231042	-0.0343705	FALSE	0	0	0	0		0	0	FALSE	0	0
BAG3	rs4752324	10	121290571	0.201789	T	C	-1.4696e-05	0.000578061	0.979718	1453231042	-0.025423	FALSE	0	0	0	0		0	0	FALSE	0	0
BAG3	rs4752325	10	121293035	0.367793	T	G	7.16722e-05	0.000475802	0.880264	1453231042	0.150634	FALSE	0	0	0	0		0	0	FALSE	0	0
BAG3	rs4752326	10	121307041	0.16998	A	G	0.000460128	0.000635037	0.468716	1453231042	0.724569	FALSE	0	0	0	0		0	0	FALSE	0	0
BAG3	rs4752327	10	121309736	0.213718	A	G	-0.000459814	0.000560819	0.412275	1453231042	-0.819896	FALSE	0	0	0	0		0	0	FALSE	0	0
BAG3	rs4752328	10	121315856	0.280318	A	G	-0.000327881	0.000485506	0.49946	1453231042	-0.675339	FALSE	0	0	0	0		0	0	FALSE	0	0
BAG3	rs4752329	10	121322343	0.133201	C	T	-0.00119718	0.000686127	0.0810136	1453231042	-1.74483	FALSE	0	0	0	0		0	0	FALSE	0	0
BAG3	rs4752330	10	121322508	0.0497018	G	T	0.000933625	0.00107833	0.386595	1453231042	0.865809	FALSE	0	0	0	0		0	0	FALSE	0	0
BAG3	rs4752331	10	121323976	0.296223	A	G	-0.000347379	0.000480217	0.469447	1453231042	-0.723379	FALSE	0	0	0	0		0	0	FALSE	0	0
BAG3	rs4752333	10	121327625	0.0894632	C	A	0.000489779	0.00080876	0.544786	1453231042	0.605592	FALSE	0	0	0	0		0	0	FALSE	0	0
BAG3	rs4752335	10	121340908	0.196819	A	G	-0.00080027	0.00056542	0.156965	1453231042	-1.41535	FALSE	0	0	0	0		0	0	FALSE	0	0
BAG3	rs4752337	10	121365248	0.159046	C	T	-0.000897485	0.000618034	0.146457	1453231042	-1.45216	FALSE	0	0	0	0		0	0	FALSE	0	0
BAG3	rs4752339	10	121421269	0.374751	T	A	0.000803358	0.00051673	0.120018	1453231042	1.5547	FALSE	0	0	0	0		0	0	FALSE	0	0
BAG3	rs4752340	10	121427877	0.373757	C	T	0.000769063	0.000515163	0.135476	1453231042	1.49285	FALSE	0	0	0	0		0	0	FALSE	0	0
BAG3	rs55725412	10	121412132	0.341948	A	G	-0.000315749	0.000518162	0.542284	1453231042	-0.609363	FALSE	0	0	0	0		0	0	FALSE	0	0
BAG3	rs55799229	10	121407005	0.304175	T	C	-0.000452271	0.000537555	0.400153	1453231042	-0.841348	FALSE	0	0	0	0		0	0	FALSE	0	0
BAG3	rs55806729	10	121178738	0.463221	A	C	-0.000116441	0.0004618	0.800929	1453231042	-0.252145	FALSE	0	0	0	0		0	0	FALSE	0	0
BAG3	rs55939019	10	121351872	0.148111	G	A	-0.000252423	0.000641063	0.693761	1453231042	-0.393757	FALSE	0	0	0	0		0	0	FALSE	0	0
BAG3	rs55942226	10	121440694	0.154076	G	C	-0.00060742	0.000658127	0.356032	1453231042	-0.922952	FALSE	0	0	0	0		0	0	FALSE	0	0
BAG3	rs55976115	10	121233643	0.163022	C	T	-0.000830932	0.000721578	0.249507	1453231042	-1.15155	FALSE	0	0	0	0		0	0	FALSE	0	0
BAG3	rs55980078	10	121412900	0.0815109	C	T	-0.000939015	0.000998983	0.347233	1453231042	-0.939971	FALSE	0	0	0	0		0	0	FALSE	0	0
BAG3	rs56339936	10	121243581	0.0815109	T	C	0.00146606	0.000884449	0.097398	1453231042	1.6576	FALSE	0	0	0	0		0	0	FALSE	0	0
BAG3	rs56383588	10	121367382	0.318091	C	G	-0.000277143	0.000522624	0.59591	1453231042	-0.530291	FALSE	0	0	0	0		0	0	FALSE	0	0
BAG3	rs56772609	10	121262192	0.0437376	C	T	0.000198937	0.00109532	0.855878	1453231042	0.181624	FALSE	0	0	0	0		0	0	FALSE	0	0
BAG3	rs56781993	10	121345680	0.146123	T	C	-0.000243853	0.000644415	0.705127	1453231042	-0.378409	FALSE	0	0	0	0		0	0	FALSE	0	0
BAG3	rs57654041	10	121308531	0.0745527	C	G	3.05199e-05	0.000947044	0.974291	1453231042	0.0322265	FALSE	0	0	0	0		0	0	FALSE	0	0
BAG3	rs58425626	10	121360984	0.127237	A	G	4.94905e-06	0.000694176	0.994312	1453231042	0.00712939	FALSE	0	0	0	0		0	0	FALSE	0	0
BAG3	rs58559	10	121398112	0.0884692	C	T	0.000291776	0.000797746	0.714551	1453231042	0.365751	FALSE	0	0	0	0		0	0	FALSE	0	0
BAG3	rs58821712	10	121206333	0.0755467	G	T	0.00119276	0.0008004	0.136169	1453231042	1.49021	FALSE	0	0	0	0		0	0	FALSE	0	0
BAG3	rs59089817	10	121281005	0.271372	C	G	-1.01138e-06	4.53164e-05	0.982194	1453231042	-0.0223182	FALSE	0	0	0	0		0	0	FALSE	0	0
BAG3	rs59786009	10	121210714	0.0974155	C	T	0.0013499	0.000758647	0.0751825	1453231042	1.77935	FALSE	0	0	0	0		0	0	FALSE	0	0
BAG3	rs59847401	10	121372136	0.206759	T	C	0.000306176	0.000582515	0.599159	1453231042	0.52561	FALSE	0	0	0	0		0	0	FALSE	0	0
BAG3	rs60458444	10	121209372	0.0894632	G	A	0.00126952	0.000772764	0.100419	1453231042	1.64283	FALSE	0	0	0	0		0	0	FALSE	0	0
BAG3	rs60469925	10	121206335	0.0467197	G	A	0.00194777	0.00102859	0.0582749	1453231042	1.89362	FALSE	0	0	0	0		0	0	FALSE	0	0
BAG3	rs61515844	10	121337803	0.127237	T	A	-9.63226e-06	0.000697397	0.98898	1453231042	-0.0138117	FALSE	0	0	0	0		0	0	FALSE	0	0
BAG3	rs61870078	10	121428424	0.0536779	C	T	0.00785438	0.00437315	0.0724874	1453231042	1.79604	FALSE	0	0	0	0		0	0	FALSE	0	0
BAG3	rs61874662	10	121242492	0.0795229	T	C	0.00146048	0.000874922	0.095064	1453231042	1.66927	FALSE	0	0	0	0		0	0	FALSE	0	0
BAG3	rs61874688	10	121273666	0.173956	G	A	-0.000669725	0.000654709	0.306338	1453231042	-1.02294	FALSE	0	0	0	0		0	0	FALSE	0	0
BAG3	rs61874690	10	121280811	0.156064	G	A	-0.000300309	0.00065419	0.646195	1453231042	-0.459055	FALSE	0	0	0	0		0	0	FALSE	0	0
BAG3	rs61874695	10	121294557	0.0487078	G	A	0.00122431	0.00114316	0.284173	1453231042	1.07099	FALSE	0	0	0	0		0	0	FALSE	0	0
BAG3	rs61874708	10	121320424	0.0576541	G	T	0.00301056	0.00425995	0.479746	1453231042	0.706711	FALSE	0	0	0	0		0	0	FALSE	0	0
BAG3	rs61874721	10	121344255	0.0407555	C	T	-8.35745e-05	0.00114254	0.941688	1453231042	-0.0731481	FALSE	0	0	0	0		0	0	FALSE	0	0
BAG3	rs61874741	10	121375014	0.0487078	G	A	-0.000227449	0.000972133	0.815009	1453231042	-0.233969	FALSE	0	0	0	0		0	0	FALSE	0	0
BAG3	rs61874742	10	121379725	0.0487078	T	C	-0.000242996	0.000965514	0.801292	1453231042	-0.251676	FALSE	0	0	0	0		0	0	FALSE	0	0
BAG3	rs61874745	10	121402377	0.202783	G	T	0.000634561	0.000595961	0.28698	1453231042	1.06477	FALSE	0	0	0	0		0	0	FALSE	0	0
BAG3	rs61876096	10	121178862	0.218688	C	T	0.000443956	0.000594462	0.455172	1453231042	0.74682	FALSE	0	0	0	0		0	0	FALSE	0	0
BAG3	rs61876100	10	121189420	0.0397614	G	T	-0.000115904	0.0011542	0.920011	1453231042	-0.10042	FALSE	0	0	0	0		0	0	FALSE	0	0
BAG3	rs61876131	10	121223228	0.358847	G	A	-0.000187803	0.000488895	0.700877	1453231042	-0.384138	FALSE	0	0	0	0		0	0	FALSE	0	0
BAG3	rs6585549	10	121231156	0.0775348	C	A	0.00163641	0.000911041	0.0724637	1453231042	1.79619	FALSE	0	0	0	0		0	0	FALSE	0	0
BAG3	rs6585550	10	121296965	0.116302	A	G	0.00080771	0.000819072	0.32407	1453231042	0.986129	FALSE	0	0	0	0		0	0	FALSE	0	0
BAG3	rs6585551	10	121296970	0.117296	C	A	0.000805767	0.000818747	0.325043	1453231042	0.984147	FALSE	0	0	0	0		0	0	FALSE	0	0
BAG3	rs6585552	10	121298846	0.097416	G	C	0.00302311	0.00349494	0.387041	1453231042	0.864996	FALSE	0	0	0	0		0	0	FALSE	0	0
BAG3	rs66696671	10	121366953	0.192843	G	T	-0.000669307	0.000579294	0.247934	1453231042	-1.15538	FALSE	0	0	0	0		0	0	FALSE	0	0
BAG3	rs66738206	10	121278728	0.232604	C	A	-0.000190485	0.000550348	0.729255	1453231042	-0.346117	FALSE	0	0	0	0		0	0	FALSE	0	0
BAG3	rs67414890	10	121381843	0.224652	T	C	-0.000410182	0.000545782	0.452322	1453231042	-0.751549	FALSE	0	0	0	0		0	0	FALSE	0	0
BAG3	rs67893360	10	121278714	0.309145	G	A	0.00046498	0.000540867	0.389957	1453231042	0.859695	FALSE	0	0	0	0		0	0	FALSE	0	0
BAG3	rs7067827	10	121267209	0.064612	G	A	0.000513906	0.00104275	0.622129	1453231042	0.492836	FALSE	0	0	0	0		0	0	FALSE	0	0
BAG3	rs7068693	10	121284664	0.0705765	G	A	-0.000988255	0.00354918	0.78067	1453231042	-0.278446	FALSE	0	0	0	0		0	0	FALSE	0	0
BAG3	rs7071853	10	121311606	0.191849	T	C	-0.000699465	0.000563388	0.214409	1453231042	-1.24153	FALSE	0	0	0	0		0	0	FALSE	0	0
BAG3	rs7073689	10	121258424	0.0636183	A	G	-7.94971e-05	0.00452942	0.985997	1453231042	-0.0175513	FALSE	0	0	0	0		0	0	FALSE	0	0
BAG3	rs7075175	10	121368847	0.254473	C	G	0.000480011	0.000555364	0.387414	1453231042	0.864317	FALSE	0	0	0	0		0	0	FALSE	0	0
BAG3	rs7075463	10	121369051	0.254473	C	A	0.000488502	0.000555445	0.379142	1453231042	0.879478	FALSE	0	0	0	0		0	0	FALSE	0	0
BAG3	rs7075684	10	121361986	0.37674	C	T	-0.000377584	0.00046221	0.41398	1453231042	-0.81691	FALSE	0	0	0	0		0	0	FALSE	0	0
BAG3	rs7076464	10	121180880	0.280318	C	T	0.000115949	0.000522522	0.824389	1453231042	0.221904	FALSE	0	0	0	0		0	0	FALSE	0	0
BAG3	rs7076555	10	121180765	0.280318	G	T	0.000125296	0.00052274	0.810571	1453231042	0.23969	FALSE	0	0	0	0		0	0	FALSE	0	0
BAG3	rs7076813	10	121181167	0.261431	A	G	-4.3477e-05	0.000529951	0.934615	1453231042	-0.0820396	FALSE	0	0	0	0		0	0	FALSE	0	0
BAG3	rs7076994	10	121291941	0.084493	C	T	0.000107597	0.000809936	0.894315	1453231042	0.132846	FALSE	0	0	0	0		0	0	FALSE	0	0
BAG3	rs7077832	10	121262352	0.0506958	C	T	0.000542492	0.00110817	0.624459	1453231042	0.48954	FALSE	0	0	0	0		0	0	FALSE	0	0
BAG3	rs7083324	10	121405714	0.213718	G	A	-0.000212051	0.000543958	0.696663	1453231042	-0.38983	FALSE	0	0	0	0		0	0	FALSE	0	0
BAG3	rs7084779	10	121208863	0.0974155	T	C	0.00129419	0.000752634	0.0855156	1453231042	1.71954	FALSE	0	0	0	0		0	0	FALSE	0	0
BAG3	rs7086437	10	121418795	0.277336	G	A	0.00102158	0.000582851	0.0796483	1453231042	1.75273	FALSE	0	0	0	0		0	0	FALSE	0	0
BAG3	rs7087527	10	121311498	0.193837	A	G	-0.000646337	0.000559706	0.248181	1453231042	-1.15478	FALSE	0	0	0	0		0	0	FALSE	0	0
BAG3	rs7088764	10	121272968	0.172962	T	C	-0.000644739	0.000648897	0.320421	1453231042	-0.993593	FALSE	0	0	0	0		0	0	FALSE	0	0
BAG3	rs7093070	10	121350115	0.126243	G	A	-1.56691e-05	0.000693922	0.981985	1453231042	-0.0225805	FALSE	0	0	0	0		0	0	FALSE	0	0
BAG3	rs7094011	10	121307632	0.304175	C	A	-0.000256928	0.00052081	0.621784	1453231042	-0.493324	FALSE	0	0	0	0		0	0	FALSE	0	0
BAG3	rs7095308	10	121426312	0.272366	G	A	-0.000183822	0.000514662	0.720964	1453231042	-0.35717	FALSE	0	0	0	0		0	0	FALSE	0	0
BAG3	rs7097199	10	121438673	0.0536779	C	T	0.000830356	0.00103372	0.421818	1453231042	0.80327	FALSE	0	0	0	0		0	0	FALSE	0	0
BAG3	rs7098960	10	121338702	0.196819	G	A	-0.000777138	0.000563649	0.167968	1453231042	-1.37876	FALSE	0	0	0	0		0	0	FALSE	0	0
BAG3	rs7099126	10	121387549	0.27336	T	C	-5.8673e-05	0.00049419	0.905493	1453231042	-0.118725	FALSE	0	0	0	0		0	0	FALSE	0	0
BAG3	rs7099478	10	121191186	0.485089	C	A	4.61682e-05	0.00046185	0.920373	1453231042	0.0999637	FALSE	0	0	0	0		0	0	FALSE	0	0
BAG3	rs7099687	10	121427330	0.27833	A	G	0.0010177	0.00058256	0.0806457	1453231042	1.74695	FALSE	0	0	0	0		0	0	FALSE	0	0
BAG3	rs7100441	10	121266607	0.063618	A	G	-0.000249204	0.00451716	0.956004	1453231042	-0.0551682	FALSE	0	0	0	0		0	0	FALSE	0	0
BAG3	rs7101058	10	121296867	0.365805	G	A	-0.000369266	0.00205669	0.857511	1453231042	-0.179543	FALSE	0	0	0	0		0	0	FALSE	0	0
BAG3	rs7101354	10	121267016	0.11332	G	A	-6.13086e-05	0.00074038	0.934005	1453231042	-0.0828069	FALSE	0	0	0	0		0	0	FALSE	0	0
BAG3	rs71480957	10	121400488	0.0487078	G	A	-0.000336814	0.000989085	0.733457	1453231042	-0.340531	FALSE	0	0	0	0		0	0	FALSE	0	0
BAG3	rs71500893	10	121266919	0.292247	C	T	-0.000139357	0.000572379	0.807642	1453231042	-0.243469	FALSE	0	0	0	0		0	0	FALSE	0	0
BAG3	rs72839237	10	121219392	0.261431	G	A	-0.000319304	0.00060381	0.596933	1453231042	-0.528816	FALSE	0	0	0	0		0	0	FALSE	0	0
BAG3	rs72839269	10	121242260	0.0337972	C	T	-0.00059913	0.00142591	0.674359	1453231042	-0.420172	FALSE	0	0	0	0		0	0	FALSE	0	0
BAG3	rs72840717	10	121290363	0.0944334	C	T	-0.000261169	0.000838319	0.755391	1453231042	-0.311539	FALSE	0	0	0	0		0	0	FALSE	0	0
BAG3	rs72840733	10	121327403	0.382704	C	A	0.000560924	0.000468274	0.230974	1453231042	1.19785	FALSE	0	0	0	0		0	0	FALSE	0	0
BAG3	rs72840745	10	121347520	0.0596421	A	C	0.000343537	0.00088855	0.699033	1453231042	0.386626	FALSE	0	0	0	0		0	0	FALSE	0	0
BAG3	rs72840777	10	121400749	0.305169	C	T	-0.000470023	0.000535633	0.38021	1453231042	-0.877509	FALSE	0	0	0	0		0	0	FALSE	0	0
BAG3	rs72840788	10	121415685	0.218688	G	A	-0.000596445	0.000594391	0.315641	1453231042	-1.00346	FALSE	0	0	0	0		0	0	FALSE	0	0
BAG3	rs72842207	10	121433675	0.217694	C	T	-0.000520339	0.000578819	0.36867	1453231042	-0.898967	FALSE	0	0	0	0		0	0	FALSE	0	0
BAG3	rs72842211	10	121438211	0.138171	G	T	-0.000388082	0.000717437	0.588557	1453231042	-0.540928	FALSE	0	0	0	0		0	0	FALSE	0	0
BAG3	rs73361016	10	121256002	0.0685885	G	A	-0.000548174	0.00102739	0.593647	1453231042	-0.533559	FALSE	0	0	0	0		0	0	FALSE	0	0
BAG3	rs74157688	10	121394938	0.0666004	A	G	0.0063413	0.00464926	0.172587	1453231042	1.36394	FALSE	0	0	0	0		0	0	FALSE	0	0
BAG3	rs74316493	10	121173117	0.0745527	C	T	0.00114557	0.000816269	0.160491	1453231042	1.40342	FALSE	0	0	0	0		0	0	FALSE	0	0
BAG3	rs74353857	10	121342224	0.0596421	G	C	-0.00183655	0.00107977	0.0889685	1453231042	-1.70086	FALSE	0	0	0	0		0	0	FALSE	0	0
BAG3	rs74469015	10	121216905	0.0298211	G	T	-0.000723847	0.00125967	0.565539	1453231042	-0.574634	FALSE	0	0	0	0		0	0	FALSE	0	0
BAG3	rs74643082	10	121191208	0.0467197	C	T	0.00835596	0.00293497	0.00441294	1453231042	2.84703	TRUE	0	0	0	0		0	0	FALSE	0	0
BAG3	rs7478438	10	121360316	0.199801	T	C	0.000628624	0.000546684	0.250191	1453231042	1.14988	FALSE	0	0	0	0		0	0	FALSE	0	0
BAG3	rs75095381	10	121264764	0.0497018	A	G	0.000471168	0.000997133	0.636553	1453231042	0.472523	FALSE	0	0	0	0		0	0	FALSE	0	0
BAG3	rs75123390	10	121217300	0.143141	G	A	-0.00139073	0.000791026	0.0787245	1453231042	-1.75813	FALSE	0	0	0	0		0	0	FALSE	0	0
BAG3	rs75210199	10	121243263	0.0337972	G	A	-0.000520953	0.00143851	0.717241	1453231042	-0.362149	FALSE	0	0	0	0		0	0	FALSE	0	0
BAG3	rs75475812	10	121248917	0.0536779	A	G	-0.000197655	0.00103067	0.847919	1453231042	-0.191774	FALSE	0	0	0	0		0	0	FALSE	0	0
BAG3	rs75490661	10	121428597	0.0516899	G	A	0.00306997	0.004358	0.481155	1453231042	0.704446	FALSE	0	0	0	0		0	0	FALSE	0	0
BAG3	rs75603439	10	121425768	0.0536779	C	A	0.000988737	0.00104604	0.344545	1453231042	0.945224	FALSE	0	0	0	0		0	0	FALSE	0	0
BAG3	rs756278	10	121260017	0.0675944	C	T	-0.000532894	0.00102516	0.603192	1453231042	-0.519816	FALSE	0	0	0	0		0	0	FALSE	0	0
BAG3	rs75668467	10	121206374	0.166004	G	A	-0.000866098	0.000688422	0.208359	1453231042	-1.25809	FALSE	0	0	0	0		0	0	FALSE	0	0
BAG3	rs76066310	10	121225863	0.134195	G	A	-0.000863511	0.000719955	0.230374	1453231042	-1.1994	FALSE	0	0	0	0		0	0	FALSE	0	0
BAG3	rs76180970	10	121308996	0.144135	A	C	-0.000800917	0.000668702	0.231027	1453231042	-1.19772	FALSE	0	0	0	0		0	0	FALSE	0	0
BAG3	rs76208362	10	121181467	0.161034	T	C	-0.000901477	0.0007086	0.203304	1453231042	-1.27219	FALSE	0	0	0	0		0	0	FALSE	0	0
BAG3	rs76363035	10	121232201	0.0258449	C	T	0.00358925	0.00166462	0.0310682	1453231042	2.1562	FALSE	0	0	0	0		0	0	FALSE	0	0
BAG3	rs76387152	10	121387001	0.0228628	C	A	0.00127323	0.00170893	0.456243	1453231042	0.745047	FALSE	0	0	0	0		0	0	FALSE	0	0
BAG3	rs76649792	10	121185722	0.16004	G	A	-0.000960626	0.000715709	0.179531	1453231042	-1.3422	FALSE	0	0	0	0		0	0	FALSE	0	0
BAG3	rs76787718	10	121357500	0.0129225	C	G	-0.00447252	0.00753462	0.552782	1453231042	-0.593596	FALSE	0	0	0	0		0	0	FALSE	0	0
BAG3	rs77026359	10	121403792	0.0208748	G	A	-0.00556897	0.0074595	0.455329	1453231042	-0.74656	FALSE	0	0	0	0		0	0	FALSE	0	0
BAG3	rs77273465	10	121213281	0.0298211	G	C	-0.000294491	0.00124588	0.813144	1453231042	-0.236373	FALSE	0	0	0	0		0	0	FALSE	0	0
BAG3	rs77493148	10	121206553	0.0765408	A	G	0.00117107	0.000798213	0.142345	1453231042	1.46711	FALSE	0	0	0	0		0	0	FALSE	0	0
BAG3	rs78006872	10	121426201	0.0536779	T	C	0.00106683	0.00104673	0.308107	1453231042	1.0192	FALSE	0	0	0	0		0	0	FALSE	0	0
BAG3	rs78037201	10	121205802	0.0755467	C	T	0.00120095	0.000800962	0.133774	1453231042	1.49938	FALSE	0	0	0	0		0	0	FALSE	0	0
BAG3	rs78210885	10	121183366	0.162028	A	G	0.00195708	0.0028247	0.488407	1453231042	0.692844	FALSE	0	0	0	0		0	0	FALSE	0	0
BAG3	rs78286160	10	121224708	0.135189	A	G	-0.000813812	0.000714949	0.255004	1453231042	-1.13828	FALSE	0	0	0	0		0	0	FALSE	0	0
BAG3	rs78787582	10	121328162	0.0894632	A	G	0.000319207	0.000874578	0.715123	1453231042	0.364984	FALSE	0	0	0	0		0	0	FALSE	0	0
BAG3	rs78902404	10	121191679	0.028827	T	C	-0.000578043	0.00124457	0.642323	1453231042	-0.464453	FALSE	0	0	0	0		0	0	FALSE	0	0
BAG3	rs7893782	10	121196643	0.373757	C	T	-0.000699784	0.00049725	0.159336	1453231042	-1.40731	FALSE	0	0	0	0		0	0	FALSE	0	0
BAG3	rs7894233	10	121423749	0.0964215	T	C	-0.000992477	0.00351954	0.777951	1453231042	-0.28199	FALSE	0	0	0	0		0	0	FALSE	0	0
BAG3	rs7896882	10	121209823	0.0974155	G	A	0.00136839	0.00075978	0.0716971	1453231042	1.80104	FALSE	0	0	0	0		0	0	FALSE	0	0
BAG3	rs7898554	10	121218988	0.141153	T	A	-0.000913385	0.000740703	0.217526	1453231042	-1.23313	FALSE	0	0	0	0		0	0	FALSE	0	0
BAG3	rs7898879	10	121258249	0.109344	G	A	5.5283e-05	0.000770812	0.942824	1453231042	0.0717204	FALSE	0	0	0	0		0	0	FALSE	0	0
BAG3	rs7900065	10	121429072	0.054672	A	G	0.000802997	0.00102033	0.431285	1453231042	0.786995	FALSE	0	0	0	0		0	0	FALSE	0	0
BAG3	rs7901864	10	121261715	0.0636183	G	A	-0.000487963	0.00104543	0.640673	1453231042	-0.466758	FALSE	0	0	0	0		0	0	FALSE	0	0
BAG3	rs7902559	10	121262399	0.0516899	C	A	-0.000357961	0.000997707	0.719757	1453231042	-0.358783	FALSE	0	0	0	0		0	0	FALSE	0	0
BAG3	rs7903026	10	121252011	0.22664	C	T	-0.000696434	0.000606394	0.250769	1453231042	-1.14848	FALSE	0	0	0	0		0	0	FALSE	0	0
BAG3	rs7905988	10	121262485	0.0516899	G	A	-0.000302685	0.000996899	0.761412	1453231042	-0.303627	FALSE	0	0	0	0		0	0	FALSE	0	0
BAG3	rs7906577	10	121418228	0.0964215	G	A	-0.000241664	0.000816727	0.767312	1453231042	-0.295893	FALSE	0	0	0	0		0	0	FALSE	0	0
BAG3	rs7907285	10	121213635	0.0974155	T	C	-0.000325137	0.00302434	0.914387	1453231042	-0.107507	FALSE	0	0	0	0		0	0	FALSE	0	0
BAG3	rs7908484	10	121370544	0.469185	A	G	-2.78122e-05	0.000458711	0.951653	1453231042	-0.0606312	FALSE	0	0	0	0		0	0	FALSE	0	0
BAG3	rs7909225	10	121423961	0.0964215	C	A	-0.00113068	0.00352072	0.748097	1453231042	-0.32115	FALSE	0	0	0	0		0	0	FALSE	0	0
BAG3	rs7910259	10	121196670	0.373757	T	C	-0.000699022	0.000497377	0.159897	1453231042	-1.40542	FALSE	0	0	0	0		0	0	FALSE	0	0
BAG3	rs7910764	10	121263805	0.096421	G	A	-0.000447109	0.000800322	0.576393	1453231042	-0.558661	FALSE	0	0	0	0		0	0	FALSE	0	0
BAG3	rs7913091	10	121209650	0.0974155	T	C	0.00129437	0.000752789	0.0855368	1453231042	1.71943	FALSE	0	0	0	0		0	0	FALSE	0	0
BAG3	rs79160793	10	121181478	0.0218688	G	A	-0.000292421	0.00621531	0.962475	1453231042	-0.0470485	FALSE	0	0	0	0		0	0	FALSE	0	0
BAG3	rs7919156	10	121325571	0.0745527	G	A	-0.000206725	0.000948534	0.827474	1453231042	-0.217942	FALSE	0	0	0	0		0	0	FALSE	0	0
BAG3	rs7919216	10	121265635	0.11332	C	T	-7.25706e-05	0.000735813	0.921435	1453231042	-0.0986264	FALSE	0	0	0	0		0	0	FALSE	0	0
BAG3	rs7919868	10	121356382	0.199801	C	T	-0.000789873	0.000562656	0.160369	1453231042	-1.40383	FALSE	0	0	0	0		0	0	FALSE	0	0
BAG3	rs7920074	10	121255540	0.110338	C	T	6.41732e-05	0.000774408	0.933957	1453231042	0.0828674	FALSE	0	0	0	0		0	0	FALSE	0	0
BAG3	rs7920314	10	121384439	0.224652	C	T	0.000255535	0.000563855	0.65041	1453231042	0.453193	FALSE	0	0	0	0		0	0	FALSE	0	0
BAG3	rs79210761	10	121292936	0.026839	T	C	-0.00297074	0.00635983	0.640421	1453231042	-0.46711	FALSE	0	0	0	0		0	0	FALSE	0	0
BAG3	rs7921223	10	121371877	0.464215	C	A	-0.000123984	0.000457163	0.786234	1453231042	-0.271204	FALSE	0	0	0	0		0	0	FALSE	0	0
BAG3	rs7922294	10	121213896	0.0974155	C	T	0.00129684	0.000755342	0.0859983	1453231042	1.7169	FALSE	0	0	0	0		0	0	FALSE	0	0
BAG3	rs79228572	10	121273366	0.0487078	G	A	-0.00170415	0.00121773	0.161677	1453231042	-1.39945	FALSE	0	0	0	0		0	0	FALSE	0	0
BAG3	rs79234733	10	121232376	0.0506958	C	T	0.000473642	0.000978555	0.628371	1453231042	0.484021	FALSE	0	0	0	0		0	0	FALSE	0	0
BAG3	rs7923747	10	121209055	0.0974155	A	G	0.00129191	0.000754727	0.0869413	1453231042	1.71176	FALSE	0	0	0	0		0	0	FALSE	0	0
BAG3	rs79345645	10	121218081	0.0298211	A	G	-0.00072947	0.00126326	0.563635	1453231042	-0.577451	FALSE	0	0	0	0		0	0	FALSE	0	0
BAG3	rs79372744	10	121303920	0.0944334	G	A	0.000225057	0.000909061	0.804466	1453231042	0.247571	FALSE	0	0	0	0		0	0	FALSE	0	0
BAG3	rs79574944	10	121177555	0.0248509	C	T	-0.000908675	0.00139962	0.516189	1453231042	-0.649231	FALSE	0	0	0	0		0	0	FALSE	0	0
BAG3	rs79598139	10	121199671	0.144135	C	T	0.000131145	0.000791143	0.868341	1453231042	0.165766	FALSE	0	0	0	0		0	0	FALSE	0	0
BAG3	rs79655865	10	121210322	0.0755467	C	T	-0.000176218	0.00106488	0.868565	1453231042	-0.165481	FALSE	0	0	0	0		0	0	FALSE	0	0
BAG3	rs79798141	10	121176078	0.0775348	C	T	0.000923337	0.000786217	0.240233	1453231042	1.1744	FALSE	0	0	0	0		0	0	FALSE	0	0
BAG3	rs79929789	10	121190260	0.144135	C	T	-0.00148912	0.000787906	0.0587615	1453231042	-1.88997	FALSE	0	0	0	0		0	0	FALSE	0	0
BAG3	rs80009432	10	121208616	0.0457256	G	A	0.000116419	0.00112342	0.917464	1453231042	0.103629	FALSE	0	0	0	0		0	0	FALSE	0	0
BAG3	rs80035651	10	121290413	0.0248509	C	T	0.000569403	0.00146832	0.698169	1453231042	0.387793	FALSE	0	0	0	0		0	0	FALSE	0	0
BAG3	rs80235841	10	121187596	0.0775348	G	T	0.0010916	0.000790399	0.167255	1453231042	1.38108	FALSE	0	0	0	0		0	0	FALSE	0	0
BAG3	rs84086	10	121378250	0.494036	T	C	-3.18628e-05	0.000459206	0.944682	1453231042	-0.0693866	FALSE	0	0	0	0		0	0	FALSE	0	0
BAG3	rs867478	10	121191906	0.494036	A	G	-8.11744e-05	0.000460375	0.860041	1453231042	-0.176322	FALSE	0	0	0	0		0	0	FALSE	0	0
BAG3	rs867760	10	121189170	0.494036	G	A	-8.13601e-05	0.000460659	0.85981	1453231042	-0.176617	FALSE	0	0	0	0		0	0	FALSE	0	0
BAG3	rs883133	10	121188960	0.0765408	A	G	0.00115339	0.000794673	0.146667	1453231042	1.45141	FALSE	0	0	0	0		0	0	FALSE	0	0
BAG3	rs8946	10	121437012	0.361829	G	C	-0.000510042	0.000504952	0.312456	1453231042	-1.01008	FALSE	0	0	0	0		0	0	FALSE	0	0
BAG3	rs915112	10	121237740	0.390656	G	C	-0.000584393	0.000501902	0.24428	1453231042	-1.16436	FALSE	0	0	0	0		0	0	FALSE	0	0
BAG3	rs915119	10	121191551	0.409543	C	T	-0.000530456	0.000495317	0.284196	1453231042	-1.07094	FALSE	0	0	0	0		0	0	FALSE	0	0
BAG3	rs915120	10	121190113	0.442346	T	C	-0.000546534	0.000487903	0.262642	1453231042	-1.12017	FALSE	0	0	0	0		0	0	FALSE	0	0
BAG3	rs915121	10	121189480	0.27336	C	T	0.000332148	0.000533449	0.53352	1453231042	0.622642	FALSE	0	0	0	0		0	0	FALSE	0	0
BAG3	rs915122	10	121189466	0.485089	C	T	-0.000179	0.000461268	0.697971	1453231042	-0.388061	FALSE	0	0	0	0		0	0	FALSE	0	0
BAG3	rs932269	10	121439676	0.450298	A	G	0.000267712	0.00046024	0.560783	1453231042	0.581678	FALSE	0	0	0	0		0	0	FALSE	0	0
BAG3	rs933048	10	121188664	0.370775	T	C	-0.000850412	0.000512046	0.0967511	1453231042	-1.66081	FALSE	0	0	0	0		0	0	FALSE	0	0
BAG3	rs9421351	10	121324896	0.300199	T	A	-0.000356135	0.000476568	0.454888	1453231042	-0.747291	FALSE	0	0	0	0		0	0	FALSE	0	0
BAG3	rs9421352	10	121327184	0.206759	A	T	0.00071106	0.00231333	0.758558	1453231042	0.307375	FALSE	0	0	0	0		0	0	FALSE	0	0
BAG3	rs9421354	10	121330721	0.245527	G	A	-0.000548937	0.00051053	0.282272	1453231042	-1.07523	FALSE	0	0	0	0		0	0	FALSE	0	0
BAG3	rs9732576	10	121294035	0.247515	G	A	0.000167387	0.000522345	0.748625	1453231042	0.320453	FALSE	0	0	0	0		0	0	FALSE	0	0
BAG3	rs9732577	10	121294198	0.250497	C	T	0.000223193	0.000522144	0.669048	1453231042	0.427454	FALSE	0	0	0	0		0	0	FALSE	0	0
BAG3	rs9988743	10	121394186	0.296223	C	T	-0.00045926	0.00053784	0.393163	1453231042	-0.853896	FALSE	0	0	0	0		0	0	FALSE	0	0
CLCNKA	rs1000997	1	16125961	0.27336	G	A	-0.000497653	0.000557316	0.371886	1453231042	-0.892946	FALSE	0	0	0	0		0	0	FALSE	0	0	0
CLCNKA	rs1002165	1	16164787	0.0934394	G	A	-0.00081844	0.000738007	0.267436	1453231042	-1.10899	FALSE	0	0	0	0		0	0	FALSE	0	0	0
CLCNKA	rs1007887	1	16509029	0.388668	C	T	-0.00026818	0.000483898	0.579436	1453231042	-0.554209	FALSE	0	0	0	0		0	0	FALSE	0	0	0
CLCNKA	rs1008529	1	16582686	0.274354	G	A	-0.000392761	0.000535891	0.463612	1453231042	-0.732912	FALSE	0	0	0	0		0	0	FALSE	0	0	0
CLCNKA	rs1010069	1	16352937	0.488072	G	A	4.62762e-05	0.000462038	0.92022	1453231042	0.100157	FALSE	0	0	0	0		0	0	FALSE	0	0	0
CLCNKA	rs10158601	1	16437298	0.413519	T	G	0.00118922	0.000593665	0.0451577	1453231042	2.00318	FALSE	0	0	0	0		0	0	FALSE	0	0	0
CLCNKA	rs10159189	1	16178255	0.442346	G	A	9.03911e-06	0.000466952	0.984556	1453231042	0.0193577	FALSE	0	0	0	0		0	0	FALSE	0	0	0
CLCNKA	rs10218517	1	16517178	0.260437	A	G	-0.000619928	0.00055967	0.268006	1453231042	-1.10767	FALSE	0	0	0	0		0	0	FALSE	0	0	0
CLCNKA	rs10458447	1	16151833	0.09841	A	G	0.000489766	0.000753702	0.515812	1453231042	0.649814	FALSE	0	0	0	0		0	0	FALSE	0	0	0
CLCNKA	rs1048237	1	16341733	0.405567	T	C	-0.000600669	0.000496005	0.225889	1453231042	-1.21102	FALSE	0	0	0	0		0	0	FALSE	0	0	0
CLCNKA	rs1048245	1	16341354	0.405567	T	G	-0.000591806	0.000495194	0.232048	1453231042	-1.1951	FALSE	0	0	0	0		0	0	FALSE	0	0	0
CLCNKA	rs1048261	1	16340951	0.322068	A	T	-0.000908364	0.000547491	0.0970878	1453231042	-1.65914	FALSE	0	0	0	0		0	0	FALSE	0	0	0
CLCNKA	rs1048302	1	16340879	0.322068	T	G	-0.00317107	0.00210887	0.132663	1453231042	-1.50368	FALSE	0	0	0	0		0	0	FALSE	0	0	0
CLCNKA	rs1048334	1	16340761	0.405567	T	C	-0.00059983	0.000495805	0.226351	1453231042	-1.20981	FALSE	0	0	0	0		0	0	FALSE	0	0	0
CLCNKA	rs10489599	1	16585818	0.33499	A	G	-0.00107697	0.00052518	0.0403	1453231042	-2.05066	FALSE	0	0	0	0		0	0	FALSE	0	0	0
CLCNKA	rs1056207	1	16344827	0.0755467	G	A	0.00262713	0.00335078	0.43302	1453231042	0.784034	FALSE	0	0	0	0		0	0	FALSE	0	0	0
CLCNKA	rs10737911	1	16167855	0.44831	T	C	4.87865e-05	0.000459453	0.915436	1453231042	0.106184	FALSE	0	0	0	0		0	0	FALSE	0	0	0
CLCNKA	rs10754897	1	16226634	0.44831	A	C	4.64975e-05	0.000465337	0.920406	1453231042	0.0999221	FALSE	0	0	0	0		0	0	FALSE	0	0	0
CLCNKA	rs10754899	1	16376719	0.060636	A	G	0.000442783	0.00100887	0.660741	1453231042	0.43889	FALSE	0	0	0	0		0	0	FALSE	0	0	0
CLCNKA	rs10796436	1	16517721	0.261431	G	C	-0.000641957	0.00056172	0.253104	1453231042	-1.14284	FALSE	0	0	0	0		0	0	FALSE	0	0	0
CLCNKA	rs10803400	1	16122857	0.181909	C	T	0.000470658	0.000641133	0.462885	1453231042	0.734104	FALSE	0	0	0	0		0	0	FALSE	0	0	0
CLCNKA	rs10803401	1	16147377	0.352883	G	A	0.000517741	0.000504937	0.305195	1453231042	1.02536	FALSE	0	0	0	0		0	0	FALSE	0	0	0
CLCNKA	rs10803402	1	16181979	0.09841	T	C	-0.00125531	0.00326255	0.700411	1453231042	-0.384765	FALSE	0	0	0	0		0	0	FALSE	0	0	0
CLCNKA	rs10803404	1	16191759	0.09841	A	G	0.000564107	0.000747853	0.450668	1453231042	0.754302	FALSE	0	0	0	0		0	0	FALSE	0	0	0
CLCNKA	rs10803407	1	16358932	0.331014	T	C	-0.000697478	0.000534418	0.191853	1453231042	-1.30512	FALSE	0	0	0	0		0	0	FALSE	0	0	0
CLCNKA	rs10803408	1	16359106	0.480119	C	T	0.000120732	0.00046484	0.795073	1453231042	0.259729	FALSE	0	0	0	0		0	0	FALSE	0	0	0
CLCNKA	rs10803412	1	16376831	0.159046	C	T	0.000262923	0.000613198	0.668088	1453231042	0.428774	FALSE	0	0	0	0		0	0	FALSE	0	0	0
CLCNKA	rs10803416	1	16392487	0.191849	C	T	-0.000396601	0.000589373	0.500998	1453231042	-0.67292	FALSE	0	0	0	0		0	0	FALSE	0	0	0
CLCNKA	rs10803417	1	16393952	0.191849	G	C	-0.000395782	0.000589114	0.501695	1453231042	-0.671825	FALSE	0	0	0	0		0	0	FALSE	0	0	0
CLCNKA	rs10803418	1	16394388	0.191849	C	A	-0.000396973	0.000589182	0.500457	1453231042	-0.67377	FALSE	0	0	0	0		0	0	FALSE	0	0	0
CLCNKA	rs10803419	1	16395029	0.498012	G	T	0.00029498	0.000484912	0.542977	1453231042	0.608317	FALSE	0	0	0	0		0	0	FALSE	0	0	0
CLCNKA	rs10907222	1	16594055	0.333996	C	A	-0.00111389	0.000529479	0.0354003	1453231042	-2.10375	FALSE	0	0	0	0		0	0	FALSE	0	0	0
CLCNKA	rs10907223	1	16459745	0.0477137	G	A	-8.35352e-05	0.00128836	0.948303	1453231042	-0.0648383	FALSE	0	0	0	0		0	0	FALSE	0	0	0
CLCNKA	rs10907282	1	16510139	0.388668	A	G	-0.00026279	0.000483746	0.586964	1453231042	-0.54324	FALSE	0	0	0	0		0	0	FALSE	0	0	0
CLCNKA	rs10907285	1	16520607	0.260437	T	G	-0.000986858	0.000589334	0.0940262	1453231042	-1.67453	FALSE	0	0	0	0		0	0	FALSE	0	0	0
CLCNKA	rs10927855	1	16128519	0.34493	T	C	0.000472951	0.000504895	0.348896	1453231042	0.936732	FALSE	0	0	0	0		0	0	FALSE	0	0	0
CLCNKA	rs10927856	1	16139916	0.34493	G	A	0.000486505	0.000503636	0.334051	1453231042	0.965986	FALSE	0	0	0	0		0	0	FALSE	0	0	0
CLCNKA	rs10927857	1	16141614	0.347913	C	T	0.000466576	0.00050537	0.355883	1453231042	0.923237	FALSE	0	0	0	0		0	0	FALSE	0	0	0
CLCNKA	rs10927863	1	16165247	0.352883	C	A	0.000498385	0.000502585	0.321372	1453231042	0.991643	FALSE	0	0	0	0		0	0	FALSE	0	0	0
CLCNKA	rs10927864	1	16165661	0.352883	C	G	0.000501763	0.000502816	0.318325	1453231042	0.997905	FALSE	0	0	0	0		0	0	FALSE	0	0	0
CLCNKA	rs10927865	1	16167356	0.44831	C	T	1.70064e-05	0.000463257	0.970716	1453231042	0.0367106	FALSE	0	0	0	0		0	0	FALSE	0	0	0
CLCNKA	rs10927866	1	16175317	0.449304	C	T	-0.00158394	0.00174574	0.364238	1453231042	-0.907319	FALSE	0	0	0	0		0	0	FALSE	0	0	0
CLCNKA	rs10927867	1	16177285	0.442346	A	G	3.36856e-05	0.00045943	0.941551	1453231042	0.0733205	FALSE	0	0	0	0		0	0	FALSE	0	0	0
CLCNKA	rs10927868	1	16183244	0.0775348	A	G	0.000597938	0.000857168	0.485444	1453231042	0.697574	FALSE	0	0	0	0		0	0	FALSE	0	0	0
CLCNKA	rs10927870	1	16192394	0.09841	A	G	0.000486969	0.000753133	0.517897	1453231042	0.646591	FALSE	0	0	0	0		0	0	FALSE	0	0	0
CLCNKA	rs10927873	1	16251900	0.0715706	C	T	-0.00055557	0.00098677	0.573422	1453231042	-0.563019	FALSE	0	0	0	0		0	0	FALSE	0	0	0
CLCNKA	rs10927875	1	16299312	0.317097	C	T	0.000684798	0.000526049	0.192993	1453231042	1.30178	FALSE	0	0	0	0		0	0	FALSE	0	0	0
CLCNKA	rs10927880	1	16320404	0.416501	C	T	1.56518e-05	0.000468452	0.973346	1453231042	0.0334117	FALSE	0	0	0	0		0	0	FALSE	0	0	0
CLCNKA	rs10927881	1	16324338	0.412525	T	C	1.28608e-05	0.000468556	0.978103	1453231042	0.0274476	FALSE	0	0	0	0		0	0	FALSE	0	0	0
CLCNKA	rs10927882	1	16327229	0.0864811	T	C	-0.000867915	0.00351842	0.805158	1453231042	-0.246678	FALSE	0	0	0	0		0	0	FALSE	0	0	0
CLCNKA	rs10927884	1	16328453	0.182903	A	G	-0.000684629	0.000627369	0.275155	1453231042	-1.09127	FALSE	0	0	0	0		0	0	FALSE	0	0	0
CLCNKA	rs10927886	1	16339313	0.393638	C	G	0.000596719	0.000498101	0.230921	1453231042	1.19799	FALSE	0	0	0	0		0	0	FALSE	0	0	0
CLCNKA	rs10927888	1	16353511	0.0298211	C	T	-0.00313472	0.00527763	0.552537	1453231042	-0.593963	FALSE	0	0	0	0		0	0	FALSE	0	0	0
CLCNKA	rs10927895	1	16376953	0.0944334	C	T	-0.000156635	0.000723302	0.828555	1453231042	-0.216555	FALSE	0	0	0	0		0	0	FALSE	0	0	0
CLCNKA	rs10927901	1	16393811	0.191849	T	C	-0.000399104	0.000589437	0.498346	1453231042	-0.677094	FALSE	0	0	0	0		0	0	FALSE	0	0	0
CLCNKA	rs10927902	1	16395147	0.193837	G	A	-0.000357763	0.000583821	0.540012	1453231042	-0.612795	FALSE	0	0	0	0		0	0	FALSE	0	0	0
CLCNKA	rs111259117	1	16347877	0.0248509	A	T	-0.00061561	0.00140899	0.662171	1453231042	-0.436917	FALSE	0	0	0	0		0	0	FALSE	0	0	0
CLCNKA	rs111361317	1	16216478	0.0616302	G	A	-0.000731314	0.000841359	0.384735	1453231042	-0.869205	FALSE	0	0	0	0		0	0	FALSE	0	0	0
CLCNKA	rs111370607	1	16327615	0.0248509	G	T	-0.000561654	0.00139129	0.686438	1453231042	-0.403694	FALSE	0	0	0	0		0	0	FALSE	0	0	0
CLCNKA	rs111470804	1	16349550	0.0248509	G	T	-0.000642568	0.00140272	0.64689	1453231042	-0.458087	FALSE	0	0	0	0		0	0	FALSE	0	0	0
CLCNKA	rs111504100	1	16146115	0.100398	G	T	-0.000758307	0.000715253	0.289057	1453231042	-1.06019	FALSE	0	0	0	0		0	0	FALSE	0	0	0
CLCNKA	rs111566047	1	16337901	0.0248509	G	A	-0.000572057	0.00139462	0.681668	1453231042	-0.410188	FALSE	0	0	0	0		0	0	FALSE	0	0	0
CLCNKA	rs111589297	1	16134501	0.0994036	G	A	-0.00083269	0.000722344	0.249009	1453231042	-1.15276	FALSE	0	0	0	0		0	0	FALSE	0	0	0
CLCNKA	rs111596636	1	16328509	0.0248509	G	A	-0.000564373	0.0013913	0.685003	1453231042	-0.405646	FALSE	0	0	0	0		0	0	FALSE	0	0	0
CLCNKA	rs111613091	1	16155803	0.0934394	T	C	-0.000807719	0.000737927	0.273701	1453231042	-1.09458	FALSE	0	0	0	0		0	0	FALSE	0	0	0
CLCNKA	rs111653964	1	16388013	0.0318091	C	T	0.00076239	0.00138639	0.582382	1453231042	0.549909	FALSE	0	0	0	0		0	0	FALSE	0	0	0
CLCNKA	rs111736127	1	16169734	0.0934394	A	G	-0.000728842	0.000727768	0.316597	1453231042	-1.00148	FALSE	0	0	0	0		0	0	FALSE	0	0	0
CLCNKA	rs111784357	1	16246674	0.0616302	C	T	-0.000222387	0.00365188	0.951442	1453231042	-0.0608965	FALSE	0	0	0	0		0	0	FALSE	0	0	0
CLCNKA	rs111817774	1	16146247	0.100398	G	A	-0.0007735	0.000716251	0.280174	1453231042	-1.07993	FALSE	0	0	0	0		0	0	FALSE	0	0	0
CLCNKA	rs111920468	1	16135039	0.0994036	T	C	-0.000777883	0.000720115	0.280044	1453231042	-1.08022	FALSE	0	0	0	0		0	0	FALSE	0	0	0
CLCNKA	rs111931297	1	16401645	0.0308151	G	C	0.000932048	0.00138572	0.501194	1453231042	0.672611	FALSE	0	0	0	0		0	0	FALSE	0	0	0
CLCNKA	rs112016494	1	16141300	0.100398	A	G	-0.000807373	0.000735179	0.272117	1453231042	-1.0982	FALSE	0	0	0	0		0	0	FALSE	0	0	0
CLCNKA	rs112024238	1	16143511	0.100398	G	A	-0.000759478	0.00071577	0.288661	1453231042	-1.06106	FALSE	0	0	0	0		0	0	FALSE	0	0	0
CLCNKA	rs112132996	1	16322045	0.0248509	G	A	-0.00049358	0.00139339	0.723167	1453231042	-0.354229	FALSE	0	0	0	0		0	0	FALSE	0	0	0
CLCNKA	rs112163175	1	16228550	0.0626243	A	G	-0.000735417	0.000838282	0.380329	1453231042	-0.877291	FALSE	0	0	0	0		0	0	FALSE	0	0	0
CLCNKA	rs112175849	1	16345359	0.027833	T	C	-0.000992858	0.00139988	0.478171	1453231042	-0.709247	FALSE	0	0	0	0		0	0	FALSE	0	0	0
CLCNKA	rs1122068	1	16127480	0.34493	G	C	0.000474021	0.000504926	0.347837	1453231042	0.938794	FALSE	0	0	0	0		0	0	FALSE	0	0	0
CLCNKA	rs112233748	1	16150583	0.0994036	T	G	-0.000677304	0.000708272	0.338933	1453231042	-0.956276	FALSE	0	0	0	0		0	0	FALSE	0	0	0
CLCNKA	rs112393679	1	16148110	0.100398	A	G	-0.000768604	0.000715989	0.283053	1453231042	-1.07349	FALSE	0	0	0	0		0	0	FALSE	0	0	0
CLCNKA	rs112473581	1	16336888	0.0248509	G	A	-0.000556362	0.00139361	0.689729	1453231042	-0.399223	FALSE	0	0	0	0		0	0	FALSE	0	0	0
CLCNKA	rs112478872	1	16331123	0.0248509	C	A	-0.000534152	0.00139039	0.700849	1453231042	-0.384175	FALSE	0	0	0	0		0	0	FALSE	0	0	0
CLCNKA	rs112515334	1	16427214	0.292247	C	G	0.00112555	0.000629189	0.0736319	1453231042	1.78889	FALSE	0	0	0	0		0	0	FALSE	0	0	0
CLCNKA	rs11260703	1	16538272	0.109344	T	C	-0.000764184	0.000771304	0.321798	1453231042	-0.990769	FALSE	0	0	0	0		0	0	FALSE	0	0	0
CLCNKA	rs11260704	1	16446764	0.0934394	C	G	0.00151509	0.000963937	0.116002	1453231042	1.57178	FALSE	0	0	0	0		0	0	FALSE	0	0	0
CLCNKA	rs11260709	1	16557691	0.2833	T	C	-0.00129275	0.000571619	0.0237247	1453231042	-2.26156	FALSE	0	0	0	0		0	0	FALSE	0	0	0
CLCNKA	rs11260710	1	16564863	0.304175	A	G	-0.00127535	0.000559819	0.0227173	1453231042	-2.27816	FALSE	0	0	0	0		0	0	FALSE	0	0	0
CLCNKA	rs11260711	1	16449746	0.313121	C	T	0.000959295	0.000568357	0.0914422	1453231042	1.68784	FALSE	0	0	0	0		0	0	FALSE	0	0	0
CLCNKA	rs11260714	1	16592683	0.333996	T	A	-0.00112244	0.000533263	0.0353049	1453231042	-2.10484	FALSE	0	0	0	0		0	0	FALSE	0	0	0
CLCNKA	rs11260742	1	16464260	0.0467197	T	C	0.000547995	0.00130036	0.67345	1453231042	0.421418	FALSE	0	0	0	0		0	0	FALSE	0	0	0
CLCNKA	rs11260745	1	16466003	0.0626243	T	C	0.000598001	0.0011007	0.586929	1453231042	0.543292	FALSE	0	0	0	0		0	0	FALSE	0	0	0
CLCNKA	rs11260822	1	16485811	0.404573	C	T	-0.000317548	0.000491606	0.518318	1453231042	-0.645941	FALSE	0	0	0	0		0	0	FALSE	0	0	0
CLCNKA	rs11260867	1	16441728	0.163022	C	G	-0.000469676	0.000639309	0.462545	1453231042	-0.734662	FALSE	0	0	0	0		0	0	FALSE	0	0	0
CLCNKA	rs11260929	1	16513746	0.128231	T	C	-0.00078615	0.000718668	0.273999	1453231042	-1.0939	FALSE	0	0	0	0		0	0	FALSE	0	0	0
CLCNKA	rs112621776	1	16340078	0.0258449	C	T	0.00124453	0.00580124	0.830134	1453231042	0.214529	FALSE	0	0	0	0		0	0	FALSE	0	0	0
CLCNKA	rs112688718	1	16389405	0.0367793	G	A	0.000593598	0.00139077	0.669517	1453231042	0.426812	FALSE	0	0	0	0		0	0	FALSE	0	0	0
CLCNKA	rs112695371	1	16134440	0.0994036	G	A	0.000148744	0.00309864	0.961714	1453231042	0.0480032	FALSE	0	0	0	0		0	0	FALSE	0	0	0
CLCNKA	rs112917580	1	16155788	0.0616302	G	A	-0.000581961	0.000840317	0.488593	1453231042	-0.692549	FALSE	0	0	0	0		0	0	FALSE	0	0	0
CLCNKA	rs112970147	1	16138329	0.0994036	G	A	-0.000878934	0.000737619	0.233425	1453231042	-1.19158	FALSE	0	0	0	0		0	0	FALSE	0	0	0
CLCNKA	rs112974793	1	16352573	0.0248509	C	T	-0.000589978	0.00140208	0.673911	1453231042	-0.420787	FALSE	0	0	0	0		0	0	FALSE	0	0	0
CLCNKA	rs113085528	1	16329616	0.0248509	C	T	-0.000552218	0.00139097	0.691365	1453231042	-0.397003	FALSE	0	0	0	0		0	0	FALSE	0	0	0
CLCNKA	rs113100790	1	16141215	0.100398	C	T	-0.000794552	0.000737975	0.28163	1453231042	-1.07667	FALSE	0	0	0	0		0	0	FALSE	0	0	0
CLCNKA	rs113132836	1	16148481	0.100398	G	A	-0.000761348	0.000716201	0.287765	1453231042	-1.06304	FALSE	0	0	0	0		0	0	FALSE	0	0	0
CLCNKA	rs113141042	1	16132475	0.0994036	G	A	-0.000770519	0.000720303	0.284748	1453231042	-1.06972	FALSE	0	0	0	0		0	0	FALSE	0	0	0
CLCNKA	rs113144840	1	16363022	0.0248509	A	T	-6.80904e-05	0.00141492	0.961618	1453231042	-0.0481232	FALSE	0	0	0	0		0	0	FALSE	0	0	0
CLCNKA	rs113151268	1	16131324	0.237575	G	A	-0.000278406	0.00068083	0.682597	1453231042	-0.408921	FALSE	0	0	0	0		0	0	FALSE	0	0	0
CLCNKA	rs113168436	1	16326907	0.0248509	A	C	-0.000557151	0.0013912	0.688802	1453231042	-0.400482	FALSE	0	0	0	0		0	0	FALSE	0	0	0
CLCNKA	rs113193404	1	16184640	0.0715706	G	A	-0.000626427	0.00098842	0.526234	1453231042	-0.633765	FALSE	0	0	0	0		0	0	FALSE	0	0	0
CLCNKA	rs113283061	1	16337678	0.0248509	C	T	-0.000561765	0.0013938	0.686914	1453231042	-0.403047	FALSE	0	0	0	0		0	0	FALSE	0	0	0
CLCNKA	rs113496286	1	16166830	0.0725646	C	T	-0.000619877	0.000985333	0.529281	1453231042	-0.629103	FALSE	0	0	0	0		0	0	FALSE	0	0	0
CLCNKA	rs113503883	1	16296953	0.0715706	C	G	-0.000439192	0.000973815	0.651988	1453231042	-0.451002	FALSE	0	0	0	0		0	0	FALSE	0	0	0
CLCNKA	rs113559070	1	16152676	0.133201	T	G	-0.00119372	0.000730386	0.102182	1453231042	-1.63437	FALSE	0	0	0	0		0	0	FALSE	0	0	0
CLCNKA	rs113572951	1	16330075	0.0248509	G	A	-0.000729159	0.00138389	0.598268	1453231042	-0.526893	FALSE	0	0	0	0		0	0	FALSE	0	0	0
CLCNKA	rs113628489	1	16586159	0.107356	G	C	-0.00076724	0.000700253	0.273227	1453231042	-1.09566	FALSE	0	0	0	0		0	0	FALSE	0	0	0
CLCNKA	rs113655353	1	16432913	0.0745527	C	T	0.00115069	0.0011006	0.29579	1453231042	1.0455	FALSE	0	0	0	0		0	0	FALSE	0	0	0
CLCNKA	rs113702365	1	16379228	0.0984095	G	A	-0.000197553	0.000727614	0.786	1453231042	-0.271508	FALSE	0	0	0	0		0	0	FALSE	0	0	0
CLCNKA	rs113730967	1	16146193	0.0616302	G	A	-0.000513674	0.000835613	0.538735	1453231042	-0.614727	FALSE	0	0	0	0		0	0	FALSE	0	0	0
CLCNKA	rs113824309	1	16148834	0.101392	G	A	-0.000823632	0.000736761	0.263605	1453231042	-1.11791	FALSE	0	0	0	0		0	0	FALSE	0	0	0
CLCNKA	rs113884821	1	16401778	0.0308151	G	A	0.000964115	0.00138715	0.487035	1453231042	0.695033	FALSE	0	0	0	0		0	0	FALSE	0	0	0
CLCNKA	rs113946894	1	16326495	0.0248509	G	A	-0.000551727	0.00139111	0.691656	1453231042	-0.396609	FALSE	0	0	0	0		0	0	FALSE	0	0	0
CLCNKA	rs113982867	1	16132315	0.0994036	A	C	-0.000819807	0.000726325	0.259022	1453231042	-1.12871	FALSE	0	0	0	0		0	0	FALSE	0	0	0
CLCNKA	rs113984088	1	16425323	0.164016	T	C	-0.000686552	0.000649616	0.290576	1453231042	-1.05686	FALSE	0	0	0	0		0	0	FALSE	0	0	0
CLCNKA	rs114580482	1	16457200	0.0387674	C	T	0.00129875	0.0014571	0.372753	1453231042	0.891328	FALSE	0	0	0	0		0	0	FALSE	0	0	0
CLCNKA	rs11489779	1	16276536	0.0795229	A	G	0.000607011	0.000848932	0.474591	1453231042	0.715029	FALSE	0	0	0	0		0	0	FALSE	0	0	0
CLCNKA	rs11489780	1	16276553	0.0854871	C	T	0.00057983	0.000820999	0.480033	1453231042	0.70625	FALSE	0	0	0	0		0	0	FALSE	0	0	0
CLCNKA	rs11552856	1	16341342	0.0765408	C	A	-0.00139409	0.000804694	0.0831939	1453231042	-1.73245	FALSE	0	0	0	0		0	0	FALSE	0	0	0
CLCNKA	rs115630241	1	16494348	0.0795229	C	A	-0.000504445	0.000912537	0.580405	1453231042	-0.552794	FALSE	0	0	0	0		0	0	FALSE	0	0	0
CLCNKA	rs11576202	1	16180498	0.0775348	G	A	0.000667363	0.000884977	0.450788	1453231042	0.754102	FALSE	0	0	0	0		0	0	FALSE	0	0	0
CLCNKA	rs11577791	1	16389118	0.210736	G	A	-0.00039163	0.000602215	0.515488	1453231042	-0.650316	FALSE	0	0	0	0		0	0	FALSE	0	0	0
CLCNKA	rs11578280	1	16553570	0.2833	A	T	-0.00136657	0.000581254	0.0187193	1453231042	-2.35107	FALSE	0	0	0	0		0	0	FALSE	0	0	0
CLCNKA	rs11578318	1	16372551	0.104374	C	A	-0.000485758	0.00069021	0.481568	1453231042	-0.703783	FALSE	0	0	0	0		0	0	FALSE	0	0	0
CLCNKA	rs115784384	1	16131378	0.0298211	C	T	-0.0012875	0.00147285	0.382034	1453231042	-0.874156	FALSE	0	0	0	0		0	0	FALSE	0	0	0
CLCNKA	rs11578807	1	16553833	0.2833	T	C	-0.00133965	0.000576863	0.0202165	1453231042	-2.3223	FALSE	0	0	0	0		0	0	FALSE	0	0	0
CLCNKA	rs11578845	1	16336654	0.416501	G	A	0.00010073	0.000463533	0.827967	1453231042	0.21731	FALSE	0	0	0	0		0	0	FALSE	0	0	0
CLCNKA	rs115796090	1	16231030	0.0188867	C	T	-0.0015053	0.00742802	0.839407	1453231042	-0.202651	FALSE	0	0	0	0		0	0	FALSE	0	0	0
CLCNKA	rs11582497	1	16320077	0.0775348	C	T	0.000768295	0.000870933	0.377695	1453231042	0.882151	FALSE	0	0	0	0		0	0	FALSE	0	0	0
CLCNKA	rs11583415	1	16266972	0.0785288	C	T	0.000578665	0.000848543	0.49527	1453231042	0.681951	FALSE	0	0	0	0		0	0	FALSE	0	0	0
CLCNKA	rs11584665	1	16352492	0.488072	G	A	0.000105131	0.000464691	0.821016	1453231042	0.226238	FALSE	0	0	0	0		0	0	FALSE	0	0	0
CLCNKA	rs11588341	1	16498048	0.454274	A	G	-0.00025551	0.000479779	0.59434	1453231042	-0.532557	FALSE	0	0	0	0		0	0	FALSE	0	0	0
CLCNKA	rs11588669	1	16490699	0.0427435	G	A	-0.00131482	0.00106931	0.218849	1453231042	-1.2296	FALSE	0	0	0	0		0	0	FALSE	0	0	0
CLCNKA	rs11589957	1	16126207	0.282306	A	G	0.000614669	0.000544141	0.258639	1453231042	1.12961	FALSE	0	0	0	0		0	0	FALSE	0	0	0
CLCNKA	rs11590647	1	16231809	0.0785288	C	G	0.000467864	0.00083981	0.577455	1453231042	0.557106	FALSE	0	0	0	0		0	0	FALSE	0	0	0
CLCNKA	rs11590986	1	16393393	0.191849	T	A	-0.000393177	0.000588974	0.504413	1453231042	-0.667562	FALSE	0	0	0	0		0	0	FALSE	0	0	0
CLCNKA	rs116276900	1	16276747	0.0407555	A	C	-0.000280126	0.00128387	0.827282	1453231042	-0.218189	FALSE	0	0	0	0		0	0	FALSE	0	0	0
CLCNKA	rs116367238	1	16122700	0.0725646	G	T	0.000465238	0.00113193	0.681064	1453231042	0.411011	FALSE	0	0	0	0		0	0	FALSE	0	0	0
CLCNKA	rs116630059	1	16558975	0.0347913	C	T	0.00118243	0.00142123	0.405422	1453231042	0.831978	FALSE	0	0	0	0		0	0	FALSE	0	0	0
CLCNKA	rs116700956	1	16363435	0.0248509	G	A	-6.64295e-05	0.00141285	0.962499	1453231042	-0.0470179	FALSE	0	0	0	0		0	0	FALSE	0	0	0
CLCNKA	rs11799354	1	16162472	0.0308151	C	T	-0.0013076	0.00134966	0.332628	1453231042	-0.968834	FALSE	0	0	0	0		0	0	FALSE	0	0	0
CLCNKA	rs11799874	1	16387573	0.44334	G	A	-0.000612711	0.000514852	0.234017	1453231042	-1.19007	FALSE	0	0	0	0		0	0	FALSE	0	0	0
CLCNKA	rs11800805	1	16452201	0.336978	A	G	0.000893526	0.000553614	0.10653	1453231042	1.61399	FALSE	0	0	0	0		0	0	FALSE	0	0	0
CLCNKA	rs11801060	1	16394859	0.0318091	G	A	0.000492608	0.00134775	0.714735	1453231042	0.365505	FALSE	0	0	0	0		0	0	FALSE	0	0	0
CLCNKA	rs11804375	1	16128974	0.0984095	C	T	-0.000764485	0.000720501	0.288669	1453231042	-1.06105	FALSE	0	0	0	0		0	0	FALSE	0	0	0
CLCNKA	rs11804968	1	16391217	0.0318091	C	T	0.000526587	0.00135268	0.697061	1453231042	0.389291	FALSE	0	0	0	0		0	0	FALSE	0	0	0
CLCNKA	rs11806925	1	16288528	0.0785288	G	A	0.000649092	0.000849014	0.444555	1453231042	0.764524	FALSE	0	0	0	0		0	0	FALSE	0	0	0
CLCNKA	rs11806941	1	16139932	0.100398	C	T	-0.000779546	0.000716396	0.276529	1453231042	-1.08815	FALSE	0	0	0	0		0	0	FALSE	0	0	0
CLCNKA	rs12015135	1	16379416	0.0984095	A	C	-0.000245893	0.000730171	0.736297	1453231042	-0.336761	FALSE	0	0	0	0		0	0	FALSE	0	0	0
CLCNKA	rs12023422	1	16187625	0.442346	G	A	2.50403e-05	0.000459681	0.956558	1453231042	0.0544731	FALSE	0	0	0	0		0	0	FALSE	0	0	0
CLCNKA	rs12023672	1	16518027	0.261431	T	A	-0.000645649	0.000562057	0.250669	1453231042	-1.14873	FALSE	0	0	0	0		0	0	FALSE	0	0	0
CLCNKA	rs12026094	1	16122018	0.232604	T	C	0.00120494	0.000660908	0.0682787	1453231042	1.82316	FALSE	0	0	0	0		0	0	FALSE	0	0	0
CLCNKA	rs12026701	1	16123199	0.39165	C	T	3.41589e-05	0.000484203	0.943759	1453231042	0.0705467	FALSE	0	0	0	0		0	0	FALSE	0	0	0
CLCNKA	rs12028551	1	16132581	0.0715706	G	A	-0.00066583	0.000995191	0.503466	1453231042	-0.669047	FALSE	0	0	0	0		0	0	FALSE	0	0	0
CLCNKA	rs12039892	1	16167974	0.442346	A	G	5.74334e-05	0.000459399	0.900509	1453231042	0.125018	FALSE	0	0	0	0		0	0	FALSE	0	0	0
CLCNKA	rs12045084	1	16123131	0.39165	T	C	4.02714e-05	0.000484158	0.93371	1453231042	0.0831782	FALSE	0	0	0	0		0	0	FALSE	0	0	0
CLCNKA	rs12057175	1	16508375	0.388668	A	G	-0.000360751	0.000492084	0.463493	1453231042	-0.733108	FALSE	0	0	0	0		0	0	FALSE	0	0	0
CLCNKA	rs12057222	1	16508534	0.388668	A	G	-0.000367516	0.000492531	0.45556	1453231042	-0.746177	FALSE	0	0	0	0		0	0	FALSE	0	0	0
CLCNKA	rs12057308	1	16549615	0.2833	A	G	-0.00133311	0.000575962	0.0206357	1453231042	-2.31458	FALSE	0	0	0	0		0	0	FALSE	0	0	0
CLCNKA	rs12057691	1	16326525	0.083499	G	A	-0.000738626	0.000826137	0.371283	1453231042	-0.894073	FALSE	0	0	0	0		0	0	FALSE	0	0	0
CLCNKA	rs12057768	1	16326701	0.083499	G	A	-0.000728065	0.000822928	0.376305	1453231042	-0.884726	FALSE	0	0	0	0		0	0	FALSE	0	0	0
CLCNKA	rs12057806	1	16326789	0.0864811	G	A	-0.00061493	0.00351242	0.861022	1453231042	-0.175073	FALSE	0	0	0	0		0	0	FALSE	0	0	0
CLCNKA	rs12058596	1	16549532	0.297217	T	C	-0.000328045	0.000518312	0.526793	1453231042	-0.63291	FALSE	0	0	0	0		0	0	FALSE	0	0	0
CLCNKA	rs12058819	1	16509695	0.0447316	A	G	-0.00141535	0.00118107	0.230778	1453231042	-1.19836	FALSE	0	0	0	0		0	0	FALSE	0	0	0
CLCNKA	rs12059258	1	16327614	0.0864811	G	A	-0.00080312	0.00082332	0.32933	1453231042	-0.975465	FALSE	0	0	0	0		0	0	FALSE	0	0	0
CLCNKA	rs12062567	1	16397970	0.0308151	A	G	0.000233577	0.00132765	0.860346	1453231042	0.175933	FALSE	0	0	0	0		0	0	FALSE	0	0	0
CLCNKA	rs12063905	1	16242620	0.0974155	C	A	-0.000474987	0.000752571	0.527941	1453231042	-0.631152	FALSE	0	0	0	0		0	0	FALSE	0	0	0
CLCNKA	rs12068573	1	16326604	0.083499	C	T	-0.000738715	0.000826145	0.37123	1453231042	-0.894172	FALSE	0	0	0	0		0	0	FALSE	0	0	0
CLCNKA	rs12069239	1	16577908	0.333996	G	C	-0.00112571	0.000531456	0.0341609	1453231042	-2.11817	FALSE	0	0	0	0		0	0	FALSE	0	0	0
CLCNKA	rs12077944	1	16228007	0.105368	T	C	-0.00044337	0.000727073	0.541994	1453231042	-0.609801	FALSE	0	0	0	0		0	0	FALSE	0	0	0
CLCNKA	rs12078100	1	16512586	0.388668	C	G	-0.00397757	0.00205715	0.053171	1453231042	-1.93353	FALSE	0	0	0	0		0	0	FALSE	0	0	0
CLCNKA	rs12078572	1	16229597	0.0984095	A	T	-0.000480127	0.000752704	0.523558	1453231042	-0.63787	FALSE	0	0	0	0		0	0	FALSE	0	0	0
CLCNKA	rs12079958	1	16226873	0.0984095	G	A	-0.000483727	0.000752785	0.520494	1453231042	-0.642583	FALSE	0	0	0	0		0	0	FALSE	0	0	0
CLCNKA	rs12083572	1	16347542	0.084493	C	A	-0.00057386	0.000819655	0.48385	1453231042	-0.700124	FALSE	0	0	0	0		0	0	FALSE	0	0	0
CLCNKA	rs12084021	1	16490058	0.0437376	T	G	-0.00146774	0.00105488	0.164109	1453231042	-1.39138	FALSE	0	0	0	0		0	0	FALSE	0	0	0
CLCNKA	rs12084628	1	16593928	0.333996	G	A	-0.00111397	0.000529493	0.0353916	1453231042	-2.10385	FALSE	0	0	0	0		0	0	FALSE	0	0	0
CLCNKA	rs12095644	1	16327566	0.0864811	A	G	-0.000807838	0.000823661	0.326696	1453231042	-0.98079	FALSE	0	0	0	0		0	0	FALSE	0	0	0
CLCNKA	rs12096463	1	16326918	0.0864811	T	C	-0.00080068	0.000826044	0.332398	1453231042	-0.969294	FALSE	0	0	0	0		0	0	FALSE	0	0	0
CLCNKA	rs12118582	1	16550716	0.084493	T	G	-0.00113434	0.000811425	0.162125	1453231042	-1.39796	FALSE	0	0	0	0		0	0	FALSE	0	0	0
CLCNKA	rs12119144	1	16130585	0.34493	T	G	0.000484588	0.000506174	0.338389	1453231042	0.957354	FALSE	0	0	0	0		0	0	FALSE	0	0	0
CLCNKA	rs12119764	1	16552772	0.2833	A	G	0.000268396	0.00214714	0.900522	1453231042	0.125002	FALSE	0	0	0	0		0	0	FALSE	0	0	0
CLCNKA	rs12121496	1	16253332	0.233598	C	T	0.000400448	0.000554558	0.470231	1453231042	0.722102	FALSE	0	0	0	0		0	0	FALSE	0	0	0
CLCNKA	rs12121918	1	16183556	0.234592	C	A	0.000444591	0.000556506	0.424351	1453231042	0.798896	FALSE	0	0	0	0		0	0	FALSE	0	0	0
CLCNKA	rs12122145	1	16195875	0.0228628	G	A	-0.00250439	0.00145427	0.085053	1453231042	-1.72209	FALSE	0	0	0	0		0	0	FALSE	0	0	0
CLCNKA	rs12123704	1	16132172	0.34493	G	A	0.000492179	0.000506398	0.331089	1453231042	0.971922	FALSE	0	0	0	0		0	0	FALSE	0	0	0
CLCNKA	rs12125239	1	16204501	0.0785288	G	A	-0.00143974	0.00364344	0.692725	1453231042	-0.39516	FALSE	0	0	0	0		0	0	FALSE	0	0	0
CLCNKA	rs12126269	1	16354590	0.187873	A	T	-0.000904553	0.000590255	0.125405	1453231042	-1.53248	FALSE	0	0	0	0		0	0	FALSE	0	0	0
CLCNKA	rs12126836	1	16463643	0.0477137	A	T	-0.000203159	0.00129899	0.87572	1453231042	-0.156397	FALSE	0	0	0	0		0	0	FALSE	0	0	0
CLCNKA	rs12129608	1	16120321	0.0427435	C	T	0.00206714	0.00124079	0.0957148	1453231042	1.66599	FALSE	0	0	0	0		0	0	FALSE	0	0	0
CLCNKA	rs12130496	1	16354964	0.0755467	G	A	-0.00122541	0.000801139	0.126121	1453231042	-1.52958	FALSE	0	0	0	0		0	0	FALSE	0	0	0
CLCNKA	rs12130637	1	16121279	0.232604	C	T	0.00121063	0.000662426	0.0676138	1453231042	1.82757	FALSE	0	0	0	0		0	0	FALSE	0	0	0
CLCNKA	rs12130825	1	16442472	0.162028	G	T	-0.00050749	0.000642012	0.429254	1453231042	-0.790468	FALSE	0	0	0	0		0	0	FALSE	0	0	0
CLCNKA	rs12131197	1	16358520	0.307157	T	C	0.000110647	0.00050089	0.82517	1453231042	0.2209	FALSE	0	0	0	0		0	0	FALSE	0	0	0
CLCNKA	rs12135073	1	16167799	0.281312	A	G	0.000723154	0.000549887	0.188478	1453231042	1.3151	FALSE	0	0	0	0		0	0	FALSE	0	0	0
CLCNKA	rs12136202	1	16202204	0.0785288	C	A	-0.00161095	0.00362905	0.657113	1453231042	-0.443903	FALSE	0	0	0	0		0	0	FALSE	0	0	0
CLCNKA	rs12136224	1	16594034	0.333996	G	A	-0.00108952	0.000526423	0.0384839	1453231042	-2.06966	FALSE	0	0	0	0		0	0	FALSE	0	0	0
CLCNKA	rs12136351	1	16220320	0.305169	G	A	0.000246217	0.000506859	0.62713	1453231042	0.485771	FALSE	0	0	0	0		0	0	FALSE	0	0	0
CLCNKA	rs12136429	1	16583478	0.333996	T	A	-0.00110221	0.000528278	0.0369412	1453231042	-2.08641	FALSE	0	0	0	0		0	0	FALSE	0	0	0
CLCNKA	rs12137597	1	16278891	0.0785288	C	T	0.000610966	0.000848181	0.471325	1453231042	0.720325	FALSE	0	0	0	0		0	0	FALSE	0	0	0
CLCNKA	rs12137628	1	16278949	0.0854871	C	A	0.000593684	0.00082016	0.469149	1453231042	0.723864	FALSE	0	0	0	0		0	0	FALSE	0	0	0
CLCNKA	rs12138156	1	16376559	0.0984095	A	G	-0.000191779	0.000719588	0.789845	1453231042	-0.266512	FALSE	0	0	0	0		0	0	FALSE	0	0	0
CLCNKA	rs12139673	1	16241984	0.0785288	A	C	0.000610903	0.000849417	0.472016	1453231042	0.719202	FALSE	0	0	0	0		0	0	FALSE	0	0	0
CLCNKA	rs12140223	1	16357147	0.0775348	C	T	-0.00123832	0.000799198	0.121272	1453231042	-1.54946	FALSE	0	0	0	0		0	0	FALSE	0	0	0
CLCNKA	rs12140311	1	16378725	0.0984095	A	T	-0.000232842	0.000725058	0.748107	1453231042	-0.321136	FALSE	0	0	0	0		0	0	FALSE	0	0	0
CLCNKA	rs12141388	1	16358366	0.0785288	C	T	-0.00132322	0.000808929	0.101889	1453231042	-1.63576	FALSE	0	0	0	0		0	0	FALSE	0	0	0
CLCNKA	rs12142566	1	16249930	0.0785288	A	G	0.00063591	0.000850004	0.454384	1453231042	0.748126	FALSE	0	0	0	0		0	0	FALSE	0	0	0
CLCNKA	rs12142732	1	16229084	0.141153	C	T	-5.25699e-05	0.000616731	0.932071	1453231042	-0.0852396	FALSE	0	0	0	0		0	0	FALSE	0	0	0
CLCNKA	rs12144143	1	16387445	0.465209	A	G	0.00044596	0.000499585	0.372039	1453231042	0.892661	FALSE	0	0	0	0		0	0	FALSE	0	0	0
CLCNKA	rs12144211	1	16383974	0.199801	G	T	-0.000437258	0.000615031	0.477114	1453231042	-0.710953	FALSE	0	0	0	0		0	0	FALSE	0	0	0
CLCNKA	rs12401559	1	16488267	0.358847	C	T	0.000645035	0.000526687	0.220687	1453231042	1.2247	FALSE	0	0	0	0		0	0	FALSE	0	0	0
CLCNKA	rs12403774	1	16132162	0.0715706	G	A	-0.000681208	0.00099914	0.495369	1453231042	-0.681795	FALSE	0	0	0	0		0	0	FALSE	0	0	0
CLCNKA	rs12404144	1	16339419	0.227634	G	C	0.00074637	0.00058537	0.202295	1453231042	1.27504	FALSE	0	0	0	0		0	0	FALSE	0	0	0
CLCNKA	rs12405694	1	16471455	0.358847	A	G	0.000571317	0.000519415	0.271365	1453231042	1.09992	FALSE	0	0	0	0		0	0	FALSE	0	0	0
CLCNKA	rs12406250	1	16471000	0.359841	G	T	0.000667745	0.000530265	0.207933	1453231042	1.25927	FALSE	0	0	0	0		0	0	FALSE	0	0	0
CLCNKA	rs12406344	1	16228852	0.0984095	A	C	-0.000480119	0.000752705	0.523566	1453231042	-0.637858	FALSE	0	0	0	0		0	0	FALSE	0	0	0
CLCNKA	rs12406632	1	16228913	0.0984095	T	C	-0.000489969	0.000750011	0.513575	1453231042	-0.653282	FALSE	0	0	0	0		0	0	FALSE	0	0	0
CLCNKA	rs12406908	1	16160550	0.0715706	A	C	-0.000678536	0.000988668	0.492515	1453231042	-0.686314	FALSE	0	0	0	0		0	0	FALSE	0	0	0
CLCNKA	rs12408442	1	16492021	0.406561	T	C	0.000436565	0.000506207	0.388454	1453231042	0.862425	FALSE	0	0	0	0		0	0	FALSE	0	0	0
CLCNKA	rs12408813	1	16488669	0.356859	G	A	0.000621292	0.000525086	0.236722	1453231042	1.18322	FALSE	0	0	0	0		0	0	FALSE	0	0	0
CLCNKA	rs12562207	1	16508059	0.389662	G	A	-0.000272714	0.000484007	0.573128	1453231042	-0.56345	FALSE	0	0	0	0		0	0	FALSE	0	0	0
CLCNKA	rs12569079	1	16124438	0.390656	G	A	8.02972e-05	0.000487728	0.869231	1453231042	0.164635	FALSE	0	0	0	0		0	0	FALSE	0	0	0
CLCNKA	rs12723168	1	16508629	0.0337972	A	G	-0.00182625	0.00131778	0.165794	1453231042	-1.38585	FALSE	0	0	0	0		0	0	FALSE	0	0	0
CLCNKA	rs12724988	1	16556647	0.2833	C	G	-0.00130291	0.000572329	0.0228152	1453231042	-2.27651	FALSE	0	0	0	0		0	0	FALSE	0	0	0
CLCNKA	rs12726942	1	16518284	0.261431	C	T	-0.000638435	0.000561038	0.255141	1453231042	-1.13795	FALSE	0	0	0	0		0	0	FALSE	0	0	0
CLCNKA	rs12728772	1	16539813	0.129225	C	T	-0.000740624	0.00074054	0.317256	1453231042	-1.00011	FALSE	0	0	0	0		0	0	FALSE	0	0	0
CLCNKA	rs12729970	1	16356869	0.0775348	C	T	-0.00126661	0.000801547	0.11406	1453231042	-1.5802	FALSE	0	0	0	0		0	0	FALSE	0	0	0
CLCNKA	rs12729991	1	16356915	0.0775348	C	G	-0.00126647	0.000801503	0.114079	1453231042	-1.58012	FALSE	0	0	0	0		0	0	FALSE	0	0	0
CLCNKA	rs12734223	1	16517662	0.156064	T	C	-0.00116746	0.000701389	0.0960129	1453231042	-1.6645	FALSE	0	0	0	0		0	0	FALSE	0	0	0
CLCNKA	rs12736225	1	16593338	0.333996	T	A	-0.00109515	0.000527131	0.0377501	1453231042	-2.07756	FALSE	0	0	0	0		0	0	FALSE	0	0	0
CLCNKA	rs12736823	1	16120005	0.233598	T	C	0.00119843	0.000660931	0.0697951	1453231042	1.81324	FALSE	0	0	0	0		0	0	FALSE	0	0	0
CLCNKA	rs12738340	1	16133396	0.099404	C	A	0.000489851	0.000757564	0.517882	1453231042	0.646613	FALSE	0	0	0	0		0	0	FALSE	0	0	0
CLCNKA	rs12738408	1	16549294	0.2833	G	C	-0.00129722	0.000571309	0.023171	1453231042	-2.2706	FALSE	0	0	0	0		0	0	FALSE	0	0	0
CLCNKA	rs12738633	1	16558056	0.0387674	A	T	-0.0019251	0.00127731	0.131771	1453231042	-1.50716	FALSE	0	0	0	0		0	0	FALSE	0	0	0
CLCNKA	rs12740149	1	16544382	0.122266	G	T	-0.00102741	0.000775273	0.185098	1453231042	-1.32522	FALSE	0	0	0	0		0	0	FALSE	0	0	0
CLCNKA	rs12740413	1	16515879	0.154076	C	T	-0.00121791	0.000704451	0.0838318	1453231042	-1.72887	FALSE	0	0	0	0		0	0	FALSE	0	0	0
CLCNKA	rs12746443	1	16359951	0.0775348	C	T	-0.0014872	0.000823483	0.0709211	1453231042	-1.80598	FALSE	0	0	0	0		0	0	FALSE	0	0	0
CLCNKA	rs12746751	1	16360137	0.0775348	C	T	-0.0014728	0.000822222	0.0732547	1453231042	-1.79124	FALSE	0	0	0	0		0	0	FALSE	0	0	0
CLCNKA	rs12747885	1	16593804	0.333996	G	C	-0.00109424	0.000527	0.0378612	1453231042	-2.07635	FALSE	0	0	0	0		0	0	FALSE	0	0	0
CLCNKA	rs12748676	1	16555882	0.2833	C	T	0.000115704	0.00215002	0.957082	1453231042	0.0538154	FALSE	0	0	0	0		0	0	FALSE	0	0	0
CLCNKA	rs12748713	1	16586033	0.125249	C	T	-0.00105995	0.000730047	0.146531	1453231042	-1.4519	FALSE	0	0	0	0		0	0	FALSE	0	0	0
CLCNKA	rs12751725	1	16539577	0.233598	G	A	-0.000687939	0.000546263	0.207902	1453231042	-1.25936	FALSE	0	0	0	0		0	0	FALSE	0	0	0
CLCNKA	rs12753224	1	16564629	0.0954274	G	A	-0.00147586	0.000834755	0.077059	1453231042	-1.76801	FALSE	0	0	0	0		0	0	FALSE	0	0	0
CLCNKA	rs12755598	1	16491406	0.0427435	T	C	0.00742054	0.00464216	0.109929	1453231042	1.59851	FALSE	0	0	0	0		0	0	FALSE	0	0	0
CLCNKA	rs12757462	1	16518170	0.261431	G	C	-0.000706694	0.000565516	0.211429	1453231042	-1.24965	FALSE	0	0	0	0		0	0	FALSE	0	0	0
CLCNKA	rs12758813	1	16343079	0.418489	G	A	4.10053e-05	0.000467319	0.930079	1453231042	0.0877458	FALSE	0	0	0	0		0	0	FALSE	0	0	0
CLCNKA	rs13306246	1	16375966	0.100398	G	A	-0.000451881	0.000769717	0.557154	1453231042	-0.587074	FALSE	0	0	0	0		0	0	FALSE	0	0	0
CLCNKA	rs13375644	1	16461833	0.0646123	C	T	-0.000395529	0.00451147	0.930138	1453231042	-0.0876718	FALSE	0	0	0	0		0	0	FALSE	0	0	0
CLCNKA	rs139816002	1	16218566	0.0616302	A	C	-0.000846068	0.000863273	0.327051	1453231042	-0.98007	FALSE	0	0	0	0		0	0	FALSE	0	0	0
CLCNKA	rs139816220	1	16180407	0.0347913	G	A	-0.00203349	0.00158321	0.198998	1453231042	-1.28441	FALSE	0	0	0	0		0	0	FALSE	0	0	0
CLCNKA	rs1414498	1	16381718	0.208748	T	C	0.000340575	0.000609378	0.576237	1453231042	0.558889	FALSE	0	0	0	0		0	0	FALSE	0	0	0
CLCNKA	rs1414499	1	16390813	0.496024	T	C	0.000303646	0.000484678	0.530993	1453231042	0.62649	FALSE	0	0	0	0		0	0	FALSE	0	0	0
CLCNKA	rs1414500	1	16390988	0.496024	G	A	0.000271073	0.000483997	0.57543	1453231042	0.560072	FALSE	0	0	0	0		0	0	FALSE	0	0	0
CLCNKA	rs142037328	1	16347184	0.0715706	T	C	-0.000272242	0.00103304	0.792139	1453231042	-0.263534	FALSE	0	0	0	0		0	0	FALSE	0	0	0
CLCNKA	rs142676885	1	16434219	0.292247	G	A	0.00112571	0.000629341	0.0736604	1453231042	1.78872	FALSE	0	0	0	0		0	0	FALSE	0	0	0
CLCNKA	rs142956209	1	16132066	0.0994036	T	C	-0.000793266	0.000721516	0.271575	1453231042	-1.09944	FALSE	0	0	0	0		0	0	FALSE	0	0	0
CLCNKA	rs143228049	1	16180430	0.0407555	G	A	-0.000278073	0.00129312	0.829736	1453231042	-0.21504	FALSE	0	0	0	0		0	0	FALSE	0	0	0
CLCNKA	rs144388032	1	16540374	0.0188867	C	T	-0.000864006	0.00240069	0.718923	1453231042	-0.359898	FALSE	0	0	0	0		0	0	FALSE	0	0	0
CLCNKA	rs144938608	1	16190726	0.0715706	C	T	-0.00065616	0.000986839	0.506108	1453231042	-0.66491	FALSE	0	0	0	0		0	0	FALSE	0	0	0
CLCNKA	rs146151788	1	16132076	0.0994036	G	A	-0.00079319	0.000721509	0.271616	1453231042	-1.09935	FALSE	0	0	0	0		0	0	FALSE	0	0	0
CLCNKA	rs1472408	1	16478654	0.410537	C	T	-0.000153829	0.00048218	0.749705	1453231042	-0.319028	FALSE	0	0	0	0		0	0	FALSE	0	0	0
CLCNKA	rs147361977	1	16155699	0.0487078	G	T	-0.000831784	0.000890675	0.350366	1453231042	-0.93388	FALSE	0	0	0	0		0	0	FALSE	0	0	0
CLCNKA	rs1497406	1	16505320	0.434394	A	G	1.57285e-05	0.000467009	0.973133	1453231042	0.0336792	FALSE	0	0	0	0		0	0	FALSE	0	0	0
CLCNKA	rs1497407	1	16499605	0.455268	T	C	-0.000251431	0.000479609	0.60011	1453231042	-0.524242	FALSE	0	0	0	0		0	0	FALSE	0	0	0
CLCNKA	rs150360338	1	16125143	0.141153	G	A	-0.000130277	0.000834461	0.875937	1453231042	-0.156121	FALSE	0	0	0	0		0	0	FALSE	0	0	0
CLCNKA	rs151327740	1	16521438	0.0984095	T	C	0.000498618	0.000910217	0.583828	1453231042	0.547801	FALSE	0	0	0	0		0	0	FALSE	0	0	0
CLCNKA	rs1544130	1	16346178	0.0715706	C	G	-0.000139109	0.000966996	0.885613	1453231042	-0.143857	FALSE	0	0	0	0		0	0	FALSE	0	0	0
CLCNKA	rs1544131	1	16345735	0.0715706	C	T	-0.000210753	0.000968286	0.827697	1453231042	-0.217656	FALSE	0	0	0	0		0	0	FALSE	0	0	0
CLCNKA	rs1566145	1	16473514	0.359841	A	G	0.000540116	0.00051698	0.296137	1453231042	1.04475	FALSE	0	0	0	0		0	0	FALSE	0	0	0
CLCNKA	rs1566146	1	16453216	0.323062	T	A	0.000906656	0.000561851	0.106594	1453231042	1.61369	FALSE	0	0	0	0		0	0	FALSE	0	0	0
CLCNKA	rs1566147	1	16453171	0.322068	C	T	0.000920809	0.000563253	0.10209	1453231042	1.63481	FALSE	0	0	0	0		0	0	FALSE	0	0	0
CLCNKA	rs1566500	1	16164188	0.0934394	G	A	-0.000812767	0.000737568	0.270481	1453231042	-1.10196	FALSE	0	0	0	0		0	0	FALSE	0	0	0
CLCNKA	rs1572381	1	16344494	0.407555	G	A	-0.000621115	0.000498485	0.212763	1453231042	-1.24601	FALSE	0	0	0	0		0	0	FALSE	0	0	0
CLCNKA	rs1617906	1	16322598	0.0715706	G	A	-0.0003718	0.000975175	0.703007	1453231042	-0.381265	FALSE	0	0	0	0		0	0	FALSE	0	0	0
CLCNKA	rs1622173	1	16328643	0.158052	C	T	-0.000701842	0.000669173	0.294262	1453231042	-1.04882	FALSE	0	0	0	0		0	0	FALSE	0	0	0
CLCNKA	rs1627145	1	16328116	0.331014	C	T	-0.000682674	0.000524128	0.192748	1453231042	-1.30249	FALSE	0	0	0	0		0	0	FALSE	0	0	0
CLCNKA	rs1628150	1	16327944	0.158052	C	T	-0.00068045	0.000667965	0.308349	1453231042	-1.01869	FALSE	0	0	0	0		0	0	FALSE	0	0	0
CLCNKA	rs16849195	1	16551507	0.2833	G	A	-0.00134054	0.000576951	0.0201528	1453231042	-2.32349	FALSE	0	0	0	0		0	0	FALSE	0	0	0
CLCNKA	rs16852021	1	16137774	0.0994036	A	G	-0.000804269	0.000721476	0.264955	1453231042	-1.11476	FALSE	0	0	0	0		0	0	FALSE	0	0	0
CLCNKA	rs16852022	1	16138095	0.0994036	T	G	-0.000832332	0.00072276	0.249485	1453231042	-1.1516	FALSE	0	0	0	0		0	0	FALSE	0	0	0
CLCNKA	rs16852024	1	16142427	0.100398	C	T	-0.00077981	0.000716504	0.276439	1453231042	-1.08835	FALSE	0	0	0	0		0	0	FALSE	0	0	0
CLCNKA	rs16852052	1	16201502	0.0785288	G	T	0.000508301	0.000846353	0.548121	1453231042	0.600578	FALSE	0	0	0	0		0	0	FALSE	0	0	0
CLCNKA	rs16852063	1	16207862	0.0715706	T	G	-0.000606462	0.000984193	0.537761	1453231042	-0.616202	FALSE	0	0	0	0		0	0	FALSE	0	0	0
CLCNKA	rs170234	1	16533817	0.265408	T	C	0.000504917	0.000548009	0.356859	1453231042	0.921367	FALSE	0	0	0	0		0	0	FALSE	0	0	0
CLCNKA	rs17369676	1	16575030	0.333996	T	C	-0.00115472	0.00053388	0.0305496	1453231042	-2.16289	FALSE	0	0	0	0		0	0	FALSE	0	0	0
CLCNKA	rs17383551	1	16314726	0.0646123	A	G	-0.00077919	0.000835356	0.350942	1453231042	-0.932764	FALSE	0	0	0	0		0	0	FALSE	0	0	0
CLCNKA	rs17387101	1	16253505	0.0407555	A	G	-0.000222987	0.00128284	0.862005	1453231042	-0.173822	FALSE	0	0	0	0		0	0	FALSE	0	0	0
CLCNKA	rs1739812	1	16311027	0.105368	C	A	0.00044147	0.000730021	0.545354	1453231042	0.604736	FALSE	0	0	0	0		0	0	FALSE	0	0	0
CLCNKA	rs1739813	1	16311563	0.416501	G	A	-0.000349557	0.000481774	0.468107	1453231042	-0.725563	FALSE	0	0	0	0		0	0	FALSE	0	0	0
CLCNKA	rs1739814	1	16312732	0.09841	A	C	0.000477532	0.000752861	0.525892	1453231042	0.63429	FALSE	0	0	0	0		0	0	FALSE	0	0	0
CLCNKA	rs1739815	1	16313274	0.09841	A	T	0.000470977	0.000752712	0.531508	1453231042	0.625706	FALSE	0	0	0	0		0	0	FALSE	0	0	0
CLCNKA	rs1739816	1	16313363	0.09841	T	C	0.000759301	0.000742126	0.30624	1453231042	1.02314	FALSE	0	0	0	0		0	0	FALSE	0	0	0
CLCNKA	rs1739817	1	16315223	0.09841	G	A	-4.45079e-05	0.000673399	0.947303	1453231042	-0.0660944	FALSE	0	0	0	0		0	0	FALSE	0	0	0
CLCNKA	rs1739818	1	16322585	0.099404	T	C	0.000777374	0.000755551	0.303534	1453231042	1.02888	FALSE	0	0	0	0		0	0	FALSE	0	0	0
CLCNKA	rs1739819	1	16323313	0.099404	C	T	0.000622689	0.000772458	0.420177	1453231042	0.806114	FALSE	0	0	0	0		0	0	FALSE	0	0	0
CLCNKA	rs1739821	1	16324154	0.0994036	T	C	-0.000446906	0.000818311	0.584975	1453231042	-0.546132	FALSE	0	0	0	0		0	0	FALSE	0	0	0
CLCNKA	rs1739822	1	16324233	0.0994036	T	C	-0.00045186	0.000818598	0.580953	1453231042	-0.551993	FALSE	0	0	0	0		0	0	FALSE	0	0	0
CLCNKA	rs1739823	1	16325048	0.099404	A	G	0.000626945	0.000772019	0.416743	1453231042	0.812085	FALSE	0	0	0	0		0	0	FALSE	0	0	0
CLCNKA	rs1739824	1	16325425	0.0994036	A	G	-0.000470653	0.000818663	0.565356	1453231042	-0.574904	FALSE	0	0	0	0		0	0	FALSE	0	0	0
CLCNKA	rs1739825	1	16326113	0.099404	C	T	0.000639862	0.000772007	0.407201	1453231042	0.828829	FALSE	0	0	0	0		0	0	FALSE	0	0	0
CLCNKA	rs1739827	1	16326344	0.0715706	C	T	-0.000409177	0.000975595	0.674915	1453231042	-0.419412	FALSE	0	0	0	0		0	0	FALSE	0	0	0
CLCNKA	rs1739828	1	16327422	0.182903	T	C	-0.000677187	0.000627302	0.280355	1453231042	-1.07952	FALSE	0	0	0	0		0	0	FALSE	0	0	0
CLCNKA	rs1739829	1	16327967	0.0715706	G	T	-0.000419003	0.000975855	0.667654	1453231042	-0.429371	FALSE	0	0	0	0		0	0	FALSE	0	0	0
CLCNKA	rs1739830	1	16328078	0.158052	T	C	-0.000679343	0.000668019	0.309176	1453231042	-1.01695	FALSE	0	0	0	0		0	0	FALSE	0	0	0
CLCNKA	rs1739831	1	16329557	0.0616302	C	A	-0.000656645	0.00109984	0.550482	1453231042	-0.597039	FALSE	0	0	0	0		0	0	FALSE	0	0	0
CLCNKA	rs1739832	1	16330240	0.158052	G	A	-0.000683316	0.000667892	0.306264	1453231042	-1.02309	FALSE	0	0	0	0		0	0	FALSE	0	0	0
CLCNKA	rs1739833	1	16331108	0.331014	T	C	-0.000641478	0.000520928	0.218168	1453231042	-1.23141	FALSE	0	0	0	0		0	0	FALSE	0	0	0
CLCNKA	rs1739834	1	16331983	0.158052	G	A	-0.000681488	0.000668229	0.307803	1453231042	-1.01984	FALSE	0	0	0	0		0	0	FALSE	0	0	0
CLCNKA	rs1739835	1	16335144	0.33002	T	C	-0.000729855	0.000532486	0.170482	1453231042	-1.37066	FALSE	0	0	0	0		0	0	FALSE	0	0	0
CLCNKA	rs1739836	1	16337252	0.094433	C	T	-0.000714804	0.000803341	0.373579	1453231042	-0.889789	FALSE	0	0	0	0		0	0	FALSE	0	0	0
CLCNKA	rs1739837	1	16337933	0.405567	C	T	-0.000550989	0.000492627	0.263366	1453231042	-1.11847	FALSE	0	0	0	0		0	0	FALSE	0	0	0
CLCNKA	rs1739839	1	16341525	0.0715706	G	A	-0.00021392	0.000969062	0.825287	1453231042	-0.22075	FALSE	0	0	0	0		0	0	FALSE	0	0	0
CLCNKA	rs1739840	1	16342237	0.405567	A	G	-0.000601863	0.000496124	0.22508	1453231042	-1.21313	FALSE	0	0	0	0		0	0	FALSE	0	0	0
CLCNKA	rs1739841	1	16342727	0.405567	A	G	-0.000609563	0.000497396	0.220383	1453231042	-1.22551	FALSE	0	0	0	0		0	0	FALSE	0	0	0
CLCNKA	rs1739842	1	16342848	0.405567	T	G	-0.000617664	0.000498019	0.214887	1453231042	-1.24024	FALSE	0	0	0	0		0	0	FALSE	0	0	0
CLCNKA	rs1739843	1	16343254	0.405567	T	C	-0.000631594	0.000499018	0.20563	1453231042	-1.26567	FALSE	0	0	0	0		0	0	FALSE	0	0	0
CLCNKA	rs1739844	1	16343322	0.405567	T	C	-0.000631246	0.000498984	0.205849	1453231042	-1.26506	FALSE	0	0	0	0		0	0	FALSE	0	0	0
CLCNKA	rs17416878	1	16446980	0.338966	A	G	0.000737451	0.000555444	0.184285	1453231042	1.32768	FALSE	0	0	0	0		0	0	FALSE	0	0	0
CLCNKA	rs1763596	1	16343835	0.408549	C	T	-0.000602892	0.000496865	0.22498	1453231042	-1.21339	FALSE	0	0	0	0		0	0	FALSE	0	0	0
CLCNKA	rs1763598	1	16342737	0.094433	T	C	-0.000678528	0.000814795	0.404981	1453231042	-0.832759	FALSE	0	0	0	0		0	0	FALSE	0	0	0
CLCNKA	rs1763599	1	16342602	0.405567	C	T	-0.000606901	0.000496548	0.221617	1453231042	-1.22224	FALSE	0	0	0	0		0	0	FALSE	0	0	0
CLCNKA	rs1763600	1	16341228	0.0715706	C	T	-0.000229243	0.000972594	0.813663	1453231042	-0.235703	FALSE	0	0	0	0		0	0	FALSE	0	0	0
CLCNKA	rs1763602	1	16339952	0.0725646	C	T	-0.000253338	0.000973906	0.794767	1453231042	-0.260126	FALSE	0	0	0	0		0	0	FALSE	0	0	0
CLCNKA	rs1763603	1	16339809	0.316103	T	C	-0.000866482	0.000548102	0.113906	1453231042	-1.58088	FALSE	0	0	0	0		0	0	FALSE	0	0	0
CLCNKA	rs1763605	1	16338925	0.322068	T	G	-0.000912601	0.000548539	0.0961736	1453231042	-1.66369	FALSE	0	0	0	0		0	0	FALSE	0	0	0
CLCNKA	rs1763606	1	16338282	0.322068	A	G	-0.000901768	0.000547391	0.0994774	1453231042	-1.64739	FALSE	0	0	0	0		0	0	FALSE	0	0	0
CLCNKA	rs1763607	1	16337509	0.405567	G	A	-0.000582732	0.000494596	0.238718	1453231042	-1.1782	FALSE	0	0	0	0		0	0	FALSE	0	0	0
CLCNKA	rs1763608	1	16336384	0.0715706	G	A	-0.00031144	0.000975458	0.749518	1453231042	-0.319275	FALSE	0	0	0	0		0	0	FALSE	0	0	0
CLCNKA	rs1763609	1	16336085	0.0745527	A	T	-0.000351092	0.000965785	0.716209	1453231042	-0.36353	FALSE	0	0	0	0		0	0	FALSE	0	0	0
CLCNKA	rs1763610	1	16335527	0.33002	G	C	-0.000638827	0.000519135	0.218487	1453231042	-1.23056	FALSE	0	0	0	0		0	0	FALSE	0	0	0
CLCNKA	rs1763612	1	16332571	0.0735586	C	T	-0.000352726	0.000973351	0.717066	1453231042	-0.362383	FALSE	0	0	0	0		0	0	FALSE	0	0	0
CLCNKA	rs1763613	1	16331909	0.158052	G	T	-0.000687112	0.000668218	0.30382	1453231042	-1.02828	FALSE	0	0	0	0		0	0	FALSE	0	0	0
CLCNKA	rs1763614	1	16331838	0.093439	C	T	-0.000725475	0.000817856	0.375055	1453231042	-0.887045	FALSE	0	0	0	0		0	0	FALSE	0	0	0
CLCNKA	rs1763615	1	16330937	0.158052	C	T	-0.00069436	0.000668544	0.298984	1453231042	-1.03861	FALSE	0	0	0	0		0	0	FALSE	0	0	0
CLCNKA	rs1763616	1	16330901	0.0715706	C	T	-0.000420661	0.000975804	0.666401	1453231042	-0.431092	FALSE	0	0	0	0		0	0	FALSE	0	0	0
CLCNKA	rs1763617	1	16330816	0.158052	C	T	-0.000678356	0.000667344	0.309391	1453231042	-1.0165	FALSE	0	0	0	0		0	0	FALSE	0	0	0
CLCNKA	rs1763618	1	16330323	0.158052	C	G	-0.000691168	0.000668283	0.301022	1453231042	-1.03424	FALSE	0	0	0	0		0	0	FALSE	0	0	0
CLCNKA	rs1763619	1	16326935	0.331014	A	G	-0.000681891	0.000524134	0.193263	1453231042	-1.30099	FALSE	0	0	0	0		0	0	FALSE	0	0	0
CLCNKA	rs1763620	1	16326021	0.099404	C	T	0.000628306	0.000771981	0.415709	1453231042	0.813888	FALSE	0	0	0	0		0	0	FALSE	0	0	0
CLCNKA	rs1763621	1	16325972	0.099404	G	A	0.000620406	0.000771602	0.421369	1453231042	0.804049	FALSE	0	0	0	0		0	0	FALSE	0	0	0
CLCNKA	rs1763622	1	16325778	0.0994036	T	C	-0.000475438	0.000818959	0.561551	1453231042	-0.580539	FALSE	0	0	0	0		0	0	FALSE	0	0	0
CLCNKA	rs1763623	1	16325127	0.0994036	T	A	-0.000458584	0.000818728	0.575399	1453231042	-0.560118	FALSE	0	0	0	0		0	0	FALSE	0	0	0
CLCNKA	rs1763624	1	16324909	0.100398	C	G	-0.000456142	0.000818639	0.577394	1453231042	-0.557195	FALSE	0	0	0	0		0	0	FALSE	0	0	0
CLCNKA	rs1763625	1	16323775	0.0994036	A	C	-0.000434577	0.000817825	0.595154	1453231042	-0.531382	FALSE	0	0	0	0		0	0	FALSE	0	0	0
CLCNKA	rs1763627	1	16315227	0.09841	C	G	0.000180232	0.000678845	0.790625	1453231042	0.265499	FALSE	0	0	0	0		0	0	FALSE	0	0	0
CLCNKA	rs1763630	1	16314535	0.09841	C	T	0.000432977	0.000751533	0.564531	1453231042	0.576125	FALSE	0	0	0	0		0	0	FALSE	0	0	0
CLCNKA	rs1763631	1	16311674	0.0725646	C	T	-0.000382794	0.000968621	0.692699	1453231042	-0.395194	FALSE	0	0	0	0		0	0	FALSE	0	0	0
CLCNKA	rs1763632	1	16312138	0.09841	T	C	0.000470069	0.00075277	0.53233	1453231042	0.624453	FALSE	0	0	0	0		0	0	FALSE	0	0	0
CLCNKA	rs1803527	1	16451413	0.032803	C	T	0.00026444	0.00123022	0.829804	1453231042	0.214953	FALSE	0	0	0	0		0	0	FALSE	0	0	0
CLCNKA	rs1805152	1	16356501	0.442346	G	A	-0.000461606	0.000484468	0.340686	1453231042	-0.95281	FALSE	0	0	0	0		0	0	FALSE	0	0	0
CLCNKA	rs1806990	1	16129377	0.34493	G	A	0.000471694	0.00050467	0.349964	1453231042	0.934659	FALSE	0	0	0	0		0	0	FALSE	0	0	0
CLCNKA	rs1806991	1	16129441	0.44334	T	C	9.93963e-05	0.000462869	0.82997	1453231042	0.21474	FALSE	0	0	0	0		0	0	FALSE	0	0	0
CLCNKA	rs181959785	1	16131588	0.0159046	C	T	0.00346669	0.00227445	0.127461	1453231042	1.52419	FALSE	0	0	0	0		0	0	FALSE	0	0	0
CLCNKA	rs182235919	1	16360677	0.0427435	A	G	0.00172976	0.00119229	0.14684	1453231042	1.45078	FALSE	0	0	0	0		0	0	FALSE	0	0	0
CLCNKA	rs1827281	1	16168129	0.0308151	C	T	-0.000942792	0.00133174	0.478984	1453231042	-0.707937	FALSE	0	0	0	0		0	0	FALSE	0	0	0
CLCNKA	rs1874630	1	16539313	0.233598	G	A	-0.000692983	0.000546591	0.204859	1453231042	-1.26783	FALSE	0	0	0	0		0	0	FALSE	0	0	0
CLCNKA	rs188244495	1	16561448	0.0337972	A	G	0.00138765	0.00143379	0.333135	1453231042	0.967819	FALSE	0	0	0	0		0	0	FALSE	0	0	0
CLCNKA	rs1889785	1	16348729	0.488072	G	A	1.62276e-05	0.000459462	0.971826	1453231042	0.0353187	FALSE	0	0	0	0		0	0	FALSE	0	0	0
CLCNKA	rs1889787	1	16363132	0.188867	C	T	-0.000883804	0.000602554	0.14244	1453231042	-1.46676	FALSE	0	0	0	0		0	0	FALSE	0	0	0
CLCNKA	rs1969065	1	16165043	0.09841	C	T	0.000705676	0.000753098	0.348743	1453231042	0.93703	FALSE	0	0	0	0		0	0	FALSE	0	0	0
CLCNKA	rs1972359	1	16356187	0.0755467	C	T	-0.00121984	0.000800344	0.127473	1453231042	-1.52414	FALSE	0	0	0	0		0	0	FALSE	0	0	0
CLCNKA	rs1976400	1	16164154	0.09841	C	A	0.000483262	0.000753285	0.521172	1453231042	0.641539	FALSE	0	0	0	0		0	0	FALSE	0	0	0
CLCNKA	rs1976401	1	16143630	0.352883	G	A	0.000494564	0.000503232	0.325718	1453231042	0.982776	FALSE	0	0	0	0		0	0	FALSE	0	0	0
CLCNKA	rs1976402	1	16143779	0.281312	G	A	0.000749711	0.000553105	0.175271	1453231042	1.35546	FALSE	0	0	0	0		0	0	FALSE	0	0	0
CLCNKA	rs1985166	1	16522269	0.262425	T	C	-0.00057521	0.000554839	0.299869	1453231042	-1.03671	FALSE	0	0	0	0		0	0	FALSE	0	0	0
CLCNKA	rs1985782	1	16555566	0.2833	A	G	-0.0013435	0.000578711	0.0202578	1453231042	-2.32154	FALSE	0	0	0	0		0	0	FALSE	0	0	0
CLCNKA	rs1995302	1	16216618	0.0675944	T	A	-0.00118582	0.000933551	0.204004	1453231042	-1.27023	FALSE	0	0	0	0		0	0	FALSE	0	0	0
CLCNKA	rs1999736	1	16319862	0.26839	G	C	0.000801109	0.00054739	0.143329	1453231042	1.46351	FALSE	0	0	0	0		0	0	FALSE	0	0	0
CLCNKA	rs2009371	1	16348083	0.324056	A	T	-0.000904752	0.000547082	0.0981723	1453231042	-1.65378	FALSE	0	0	0	0		0	0	FALSE	0	0	0
CLCNKA	rs2009594	1	16346924	0.419483	G	A	7.27857e-05	0.000467223	0.876204	1453231042	0.155784	FALSE	0	0	0	0		0	0	FALSE	0	0	0
CLCNKA	rs2013019	1	16129320	0.44334	T	C	9.49501e-05	0.000462707	0.837411	1453231042	0.205206	FALSE	0	0	0	0		0	0	FALSE	0	0	0
CLCNKA	rs2013745	1	16126676	0.34493	G	A	0.000456875	0.000503949	0.364624	1453231042	0.906589	FALSE	0	0	0	0		0	0	FALSE	0	0	0
CLCNKA	rs2014562	1	16374533	0.060636	G	C	0.000349552	0.00100589	0.728212	1453231042	0.347505	FALSE	0	0	0	0		0	0	FALSE	0	0	0
CLCNKA	rs2014776	1	16581955	0.333996	A	G	-0.00111773	0.00053018	0.0350128	1453231042	-2.10821	FALSE	0	0	0	0		0	0	FALSE	0	0	0
CLCNKA	rs2014841	1	16372971	0.167992	G	A	0.000482687	0.000594432	0.416784	1453231042	0.812013	FALSE	0	0	0	0		0	0	FALSE	0	0	0
CLCNKA	rs2014848	1	16372911	0.16998	G	A	0.000408164	0.000588961	0.488294	1453231042	0.693024	FALSE	0	0	0	0		0	0	FALSE	0	0	0
CLCNKA	rs2015352	1	16371067	0.343936	G	T	0.000282819	0.000507753	0.577527	1453231042	0.557001	FALSE	0	0	0	0		0	0	FALSE	0	0	0
CLCNKA	rs2015509	1	16358148	0.331014	T	C	-0.000704205	0.000531823	0.185458	1453231042	-1.32413	FALSE	0	0	0	0		0	0	FALSE	0	0	0
CLCNKA	rs2015515	1	16358134	0.0775348	T	C	-0.00126767	0.000801298	0.113644	1453231042	-1.58202	FALSE	0	0	0	0		0	0	FALSE	0	0	0
CLCNKA	rs2017583	1	16350028	0.324056	A	G	-0.000891438	0.000548595	0.104174	1453231042	-1.62495	FALSE	0	0	0	0		0	0	FALSE	0	0	0
CLCNKA	rs2062594	1	16124985	0.161034	T	C	0.000926336	0.000761777	0.223977	1453231042	1.21602	FALSE	0	0	0	0		0	0	FALSE	0	0	0
CLCNKA	rs2064595	1	16413291	0.271372	G	A	-0.000199036	0.000553369	0.719086	1453231042	-0.359681	FALSE	0	0	0	0		0	0	FALSE	0	0	0
CLCNKA	rs2088392	1	16487754	0.043738	C	T	0.00146497	0.00105062	0.163202	1453231042	1.39438	FALSE	0	0	0	0		0	0	FALSE	0	0	0
CLCNKA	rs2095541	1	16373509	0.107356	C	T	-0.000534249	0.000692548	0.440455	1453231042	-0.771425	FALSE	0	0	0	0		0	0	FALSE	0	0	0
CLCNKA	rs2102664	1	16130169	0.444334	A	G	1.03305e-06	5.49072e-05	0.984989	1453231042	0.0188145	FALSE	0	0	0	0		0	0	FALSE	0	0	0
CLCNKA	rs2132852	1	16517465	0.261431	A	C	-0.000625465	0.000560767	0.26469	1453231042	-1.11538	FALSE	0	0	0	0		0	0	FALSE	0	0	0
CLCNKA	rs2152458	1	16396698	0.0606362	A	G	0.00151425	0.00114456	0.185836	1453231042	1.323	FALSE	0	0	0	0		0	0	FALSE	0	0	0
CLCNKA	rs2152459	1	16396806	0.0606362	T	C	0.00415259	0.00445661	0.351449	1453231042	0.931782	FALSE	0	0	0	0		0	0	FALSE	0	0	0
CLCNKA	rs2179615	1	16282426	0.232604	G	A	0.000567575	0.000568142	0.317793	1453231042	0.999003	FALSE	0	0	0	0		0	0	FALSE	0	0	0
CLCNKA	rs2202045	1	16156406	0.09841	T	C	0.000355048	0.000746272	0.634244	1453231042	0.475763	FALSE	0	0	0	0		0	0	FALSE	0	0	0
CLCNKA	rs221026	1	16522456	0.262425	A	G	0.000556654	0.000556638	0.317297	1453231042	1.00003	FALSE	0	0	0	0		0	0	FALSE	0	0	0
CLCNKA	rs221027	1	16522469	0.262425	A	G	0.000546954	0.000555746	0.325027	1453231042	0.984179	FALSE	0	0	0	0		0	0	FALSE	0	0	0
CLCNKA	rs221029	1	16523767	0.156064	C	G	0.00107331	0.00068828	0.1189	1453231042	1.55941	FALSE	0	0	0	0		0	0	FALSE	0	0	0
CLCNKA	rs221030	1	16524653	0.263419	A	G	0.000554322	0.000553539	0.316626	1453231042	1.00141	FALSE	0	0	0	0		0	0	FALSE	0	0	0
CLCNKA	rs221031	1	16524869	0.262425	T	C	0.000570858	0.000554678	0.3034	1453231042	1.02917	FALSE	0	0	0	0		0	0	FALSE	0	0	0
CLCNKA	rs221032	1	16525549	0.263419	C	T	0.00055673	0.000553372	0.314382	1453231042	1.00607	FALSE	0	0	0	0		0	0	FALSE	0	0	0
CLCNKA	rs221033	1	16525887	0.263419	G	C	0.000550416	0.000552974	0.319554	1453231042	0.995375	FALSE	0	0	0	0		0	0	FALSE	0	0	0
CLCNKA	rs221034	1	16525966	0.263419	T	C	0.000549476	0.000553186	0.320567	1453231042	0.993294	FALSE	0	0	0	0		0	0	FALSE	0	0	0
CLCNKA	rs221035	1	16526529	0.260437	G	A	0.000790105	0.000526797	0.133659	1453231042	1.49983	FALSE	0	0	0	0		0	0	FALSE	0	0	0
CLCNKA	rs221036	1	16527321	0.263419	A	G	0.000549734	0.000552936	0.320121	1453231042	0.99421	FALSE	0	0	0	0		0	0	FALSE	0	0	0
CLCNKA	rs221037	1	16528233	0.263419	G	A	0.000549271	0.000553207	0.320766	1453231042	0.992885	FALSE	0	0	0	0		0	0	FALSE	0	0	0
CLCNKA	rs221038	1	16528721	0.263419	A	G	0.000563347	0.000553761	0.309006	1453231042	1.01731	FALSE	0	0	0	0		0	0	FALSE	0	0	0
CLCNKA	rs221039	1	16529117	0.263419	T	C	0.000559026	0.000553662	0.312645	1453231042	1.00969	FALSE	0	0	0	0		0	0	FALSE	0	0	0
CLCNKA	rs221040	1	16529359	0.263419	A	T	0.000543528	0.000552649	0.325364	1453231042	0.983495	FALSE	0	0	0	0		0	0	FALSE	0	0	0
CLCNKA	rs221042	1	16529818	0.262425	C	T	0.000564499	0.000554348	0.30853	1453231042	1.01831	FALSE	0	0	0	0		0	0	FALSE	0	0	0
CLCNKA	rs221043	1	16529824	0.262425	C	T	0.000566936	0.000554558	0.306629	1453231042	1.02232	FALSE	0	0	0	0		0	0	FALSE	0	0	0
CLCNKA	rs221045	1	16530049	0.260437	C	T	0.000813277	0.000528447	0.123806	1453231042	1.53899	FALSE	0	0	0	0		0	0	FALSE	0	0	0
CLCNKA	rs221046	1	16530177	0.263419	C	T	0.000585886	0.000555637	0.291682	1453231042	1.05444	FALSE	0	0	0	0		0	0	FALSE	0	0	0
CLCNKA	rs221047	1	16530364	0.156064	G	A	0.00107787	0.000687732	0.117049	1453231042	1.56728	FALSE	0	0	0	0		0	0	FALSE	0	0	0
CLCNKA	rs221049	1	16530850	0.264414	T	G	0.000577763	0.000555085	0.297943	1453231042	1.04085	FALSE	0	0	0	0		0	0	FALSE	0	0	0
CLCNKA	rs221050	1	16532803	0.265408	G	A	0.000518298	0.000548906	0.345047	1453231042	0.944239	FALSE	0	0	0	0		0	0	FALSE	0	0	0
CLCNKA	rs221052	1	16533022	0.259443	C	T	0.000837932	0.000529777	0.113725	1453231042	1.58167	FALSE	0	0	0	0		0	0	FALSE	0	0	0
CLCNKA	rs221056	1	16534002	0.265408	C	G	0.00051375	0.000548572	0.349004	1453231042	0.936523	FALSE	0	0	0	0		0	0	FALSE	0	0	0
CLCNKA	rs221057	1	16534255	0.265408	C	G	0.000524191	0.000549345	0.339978	1453231042	0.954209	FALSE	0	0	0	0		0	0	FALSE	0	0	0
CLCNKA	rs221058	1	16534646	0.265408	C	G	0.000601411	0.000553922	0.277598	1453231042	1.08573	FALSE	0	0	0	0		0	0	FALSE	0	0	0
CLCNKA	rs221059	1	16534730	0.265408	G	A	0.000517048	0.000548625	0.345966	1453231042	0.942443	FALSE	0	0	0	0		0	0	FALSE	0	0	0
CLCNKA	rs221060	1	16534921	0.265408	A	G	0.000544993	0.000550247	0.321953	1453231042	0.990452	FALSE	0	0	0	0		0	0	FALSE	0	0	0
CLCNKA	rs221061	1	16535804	0.256461	G	C	0.000887607	0.000536638	0.0981246	1453231042	1.65401	FALSE	0	0	0	0		0	0	FALSE	0	0	0
CLCNKA	rs221062	1	16536548	0.265408	G	A	0.000523182	0.000551581	0.342867	1453231042	0.948515	FALSE	0	0	0	0		0	0	FALSE	0	0	0
CLCNKA	rs221063	1	16537289	0.257455	T	G	0.00090063	0.000537754	0.0939736	1453231042	1.6748	FALSE	0	0	0	0		0	0	FALSE	0	0	0
CLCNKA	rs2235740	1	16243424	0.105368	C	A	-0.000436647	0.000726999	0.548096	1453231042	-0.600616	FALSE	0	0	0	0		0	0	FALSE	0	0	0
CLCNKA	rs2235741	1	16243482	0.100398	C	T	-0.000520717	0.000750491	0.487786	1453231042	-0.693835	FALSE	0	0	0	0		0	0	FALSE	0	0	0
CLCNKA	rs2235742	1	16243563	0.0984095	C	T	-0.000468767	0.000752589	0.533369	1453231042	-0.622872	FALSE	0	0	0	0		0	0	FALSE	0	0	0
CLCNKA	rs2235743	1	16243571	0.0984095	C	T	-0.000465788	0.000752533	0.535943	1453231042	-0.61896	FALSE	0	0	0	0		0	0	FALSE	0	0	0
CLCNKA	rs2235744	1	16243598	0.0984095	G	A	-0.000438103	0.000756426	0.562471	1453231042	-0.579175	FALSE	0	0	0	0		0	0	FALSE	0	0	0
CLCNKA	rs2268341	1	16275247	0.366799	C	T	-1.95862e-05	0.000468987	0.966688	1453231042	-0.0417628	FALSE	0	0	0	0		0	0	FALSE	0	0	0
CLCNKA	rs2273313	1	16542876	0.22664	A	T	-0.000866289	0.000563993	0.12454	1453231042	-1.53599	FALSE	0	0	0	0		0	0	FALSE	0	0	0
CLCNKA	rs2273314	1	16542835	0.22664	A	G	-0.000866447	0.000564006	0.12448	1453231042	-1.53624	FALSE	0	0	0	0		0	0	FALSE	0	0	0
CLCNKA	rs2282263	1	16374590	0.104374	C	T	-0.0004763	0.000689817	0.489897	1453231042	-0.690473	FALSE	0	0	0	0		0	0	FALSE	0	0	0
CLCNKA	rs2291804	1	16464936	0.027833	C	T	0.00173316	0.00173748	0.318515	1453231042	0.997515	FALSE	0	0	0	0		0	0	FALSE	0	0	0
CLCNKA	rs2291805	1	16458814	0.055666	C	T	0.000547796	0.00120302	0.648856	1453231042	0.455352	FALSE	0	0	0	0		0	0	FALSE	0	0	0
CLCNKA	rs24263	1	16522975	0.262425	T	C	0.000572196	0.000554556	0.302161	1453231042	1.03181	FALSE	0	0	0	0		0	0	FALSE	0	0	0
CLCNKA	rs2474308	1	16327846	0.158052	G	A	-0.000700866	0.000669784	0.295374	1453231042	-1.04641	FALSE	0	0	0	0		0	0	FALSE	0	0	0
[truncated: 2,069 more rows]
