# Supplementary material for: Genomic structural equation modeling reveals shared genetic structure of cardiac function and structure-function association studies of CLCNKA mutations
Source: Research Square preprint supplement (doi:10.21203/rs.3.rs-7363435/v1), 2025-09-19
Supplement: Supplementary file 18 [file e15cc940960b6afcdaa7af3c.xlsx]

## Sheet: Sheet 1
id.exposure	outcome	exposure	method	nsnp	b	se	pval	lo_ci	up_ci	or	or_lci95	or_uci95
bbj-a-1	cardiac function	Body mass index || id:bbj-a-1	Inverse variance weighted	41	-0.0181915	0.0225671	0.420181	-0.062423	0.02604	0.981973	0.939485	1.02638
bbj-a-103	cardiac function	Chronic obstructive pulmonary disease || id:bbj-a-103	Inverse variance weighted	3	-0.0179283	0.0166881	0.282682	-0.0506369	0.0147804	0.982231	0.950624	1.01489
bbj-a-36	cardiac function	Lymphocyte count || id:bbj-a-36	Inverse variance weighted	3	0.0300381	0.055107	0.585693	-0.0779715	0.138048	1.03049	0.924991	1.14803
eqtl-a-ENSG00000138119	cardiac function	ENSG00000138119 || id:eqtl-a-ENSG00000138119	Inverse variance weighted	5	-0.00076211	0.00990645	0.938679	-0.0201788	0.0186545	0.999238	0.980023	1.01883
eqtl-a-ENSG00000138293	cardiac function	ENSG00000138293 || id:eqtl-a-ENSG00000138293	Inverse variance weighted	4	0.0116749	0.0103041	0.257197	-0.00852104	0.0318709	1.01174	0.991515	1.03238
eqtl-a-ENSG00000138449	cardiac function	ENSG00000138449 || id:eqtl-a-ENSG00000138449	Inverse variance weighted	4	-0.0324153	0.016342	0.0473057	-0.0644456	-0.000384905	0.968104	0.937587	0.999615
eqtl-a-ENSG00000138468	cardiac function	ENSG00000138468 || id:eqtl-a-ENSG00000138468	Inverse variance weighted	4	0.0039539	0.00478568	0.408695	-0.00542605	0.0133338	1.00396	0.994589	1.01342
ebi-a-GCST90001745	cardiac function	CD20 on CD24+ CD27+ B cell || id:ebi-a-GCST90001745	Inverse variance weighted	4	-0.00176867	0.00999175	0.859498	-0.0213525	0.0178152	0.998233	0.978874	1.01797
eqtl-a-ENSG00000138646	cardiac function	ENSG00000138646 || id:eqtl-a-ENSG00000138646	Inverse variance weighted	6	-0.0153057	0.0119696	0.200998	-0.0387662	0.00815475	0.984811	0.961976	1.00819
eqtl-a-ENSG00000138722	cardiac function	ENSG00000138722 || id:eqtl-a-ENSG00000138722	Inverse variance weighted	7	0.00897845	0.00588795	0.127288	-0.00256193	0.0205188	1.00902	0.997441	1.02073
eqtl-a-ENSG00000138735	cardiac function	ENSG00000138735 || id:eqtl-a-ENSG00000138735	Inverse variance weighted	5	0.00614322	0.0149913	0.681963	-0.0232398	0.0355262	1.00616	0.977028	1.03616
bbj-a-37	cardiac function	Mean arterial pressure || id:bbj-a-37	Inverse variance weighted	16	-0.00656593	0.0382339	0.863649	-0.0815044	0.0683726	0.993456	0.921729	1.07076
eqtl-a-ENSG00000138795	cardiac function	ENSG00000138795 || id:eqtl-a-ENSG00000138795	Inverse variance weighted	4	0.00751342	0.0427119	0.860365	-0.076202	0.0912288	1.00754	0.926629	1.09552
eqtl-a-ENSG00000138829	cardiac function	ENSG00000138829 || id:eqtl-a-ENSG00000138829	Inverse variance weighted	5	0.00773054	0.00729472	0.289261	-0.0065671	0.0220282	1.00776	0.993454	1.02227
eqtl-a-ENSG00000138867	cardiac function	ENSG00000138867 || id:eqtl-a-ENSG00000138867	Inverse variance weighted	4	-0.00749254	0.03395	0.825331	-0.0740346	0.0590495	0.992535	0.92864	1.06083
ebi-a-GCST90001757	cardiac function	CD20 on IgD- CD38dim B cell || id:ebi-a-GCST90001757	Inverse variance weighted	4	0.00429765	0.00956827	0.653319	-0.0144562	0.0230514	1.00431	0.985648	1.02332
ebi-a-GCST90001761	cardiac function	CD20 on switched memory B cell || id:ebi-a-GCST90001761	Inverse variance weighted	4	-0.000792661	0.00940067	0.932802	-0.019218	0.0176326	0.999208	0.980966	1.01779
bbj-a-37	cardiac function	Mean arterial pressure || id:bbj-a-37	Inverse variance weighted	16	-0.00656593	0.0382339	0.863649	-0.0815044	0.0683726	0.993456	0.921729	1.07076
eqtl-a-ENSG00000139970	cardiac function	ENSG00000139970 || id:eqtl-a-ENSG00000139970	Inverse variance weighted	4	-0.0229599	0.00937921	0.0143669	-0.0413431	-0.00457665	0.977302	0.9595	0.995434
eqtl-a-ENSG00000140090	cardiac function	ENSG00000140090 || id:eqtl-a-ENSG00000140090	Inverse variance weighted	9	0.00311158	0.00533346	0.55962	-0.00734202	0.0135652	1.00312	0.992685	1.01366
eqtl-a-ENSG00000140287	cardiac function	ENSG00000140287 || id:eqtl-a-ENSG00000140287	Inverse variance weighted	6	0.0053168	0.0173277	0.758967	-0.0286456	0.0392792	1.00533	0.971761	1.04006
eqtl-a-ENSG00000140416	cardiac function	ENSG00000140416 || id:eqtl-a-ENSG00000140416	Inverse variance weighted	4	0.00333802	0.0114627	0.770893	-0.0191288	0.0258049	1.00334	0.981053	1.02614
eqtl-a-ENSG00000140479	cardiac function	ENSG00000140479 || id:eqtl-a-ENSG00000140479	Inverse variance weighted	5	0.0155608	0.0105774	0.141254	-0.0051709	0.0362924	1.01568	0.994842	1.03696
eqtl-a-ENSG00000140678	cardiac function	ENSG00000140678 || id:eqtl-a-ENSG00000140678	Inverse variance weighted	4	-0.0137094	0.0136312	0.314542	-0.0404264	0.0130077	0.986384	0.96038	1.01309
eqtl-a-ENSG00000140682	cardiac function	ENSG00000140682 || id:eqtl-a-ENSG00000140682	Inverse variance weighted	6	0.0187546	0.00874505	0.0319848	0.00161434	0.0358949	1.01893	1.00162	1.03655
bbj-a-38	cardiac function	Mean corpuscular hemoglobin || id:bbj-a-38	Inverse variance weighted	38	0.00876494	0.0131011	0.503479	-0.0169131	0.034443	1.0088	0.983229	1.03504
eqtl-a-ENSG00000140968	cardiac function	ENSG00000140968 || id:eqtl-a-ENSG00000140968	Inverse variance weighted	6	-0.0189525	0.0275226	0.491064	-0.0728967	0.0349917	0.981226	0.929697	1.03561
eqtl-a-ENSG00000141096	cardiac function	ENSG00000141096 || id:eqtl-a-ENSG00000141096	Inverse variance weighted	6	-0.0116166	0.00741079	0.116993	-0.0261417	0.00290857	0.988451	0.974197	1.00291
eqtl-a-ENSG00000141098	cardiac function	ENSG00000141098 || id:eqtl-a-ENSG00000141098	Inverse variance weighted	4	0.00550138	0.0353367	0.876282	-0.0637586	0.0747614	1.00552	0.938231	1.07763
eqtl-a-ENSG00000141505	cardiac function	ENSG00000141505 || id:eqtl-a-ENSG00000141505	Inverse variance weighted	4	-0.00205769	0.0148668	0.889918	-0.0311967	0.0270813	0.997944	0.969285	1.02745
bbj-a-38	cardiac function	Mean corpuscular hemoglobin || id:bbj-a-38	Inverse variance weighted	38	0.00876494	0.0131011	0.503479	-0.0169131	0.034443	1.0088	0.983229	1.03504
eqtl-a-ENSG00000141622	cardiac function	ENSG00000141622 || id:eqtl-a-ENSG00000141622	Inverse variance weighted	6	0.0202638	0.0174034	0.244278	-0.0138468	0.0543744	1.02047	0.986249	1.05588
eqtl-a-ENSG00000141736	cardiac function	ENSG00000141736 || id:eqtl-a-ENSG00000141736	Inverse variance weighted	5	0.0177945	0.0175597	0.310883	-0.0166225	0.0522115	1.01795	0.983515	1.0536
eqtl-a-ENSG00000142192	cardiac function	ENSG00000142192 || id:eqtl-a-ENSG00000142192	Inverse variance weighted	6	-7.30306e-05	0.0111428	0.994771	-0.0219129	0.0217668	0.999927	0.978325	1.02201
eqtl-a-ENSG00000142453	cardiac function	ENSG00000142453 || id:eqtl-a-ENSG00000142453	Inverse variance weighted	6	0.00514666	0.0147787	0.727653	-0.0238195	0.0341128	1.00516	0.976462	1.0347
eqtl-a-ENSG00000142512	cardiac function	ENSG00000142512 || id:eqtl-a-ENSG00000142512	Inverse variance weighted	4	-0.000353661	0.0229258	0.987692	-0.0452882	0.0445809	0.999646	0.955722	1.04559
eqtl-a-ENSG00000142687	cardiac function	ENSG00000142687 || id:eqtl-a-ENSG00000142687	Inverse variance weighted	4	-0.0185387	0.0221337	0.402268	-0.0619206	0.0248433	0.981632	0.939957	1.02515
bbj-a-39	cardiac function	Mean corpuscular hemoglobin concentration || id:bbj-a-39	Inverse variance weighted	18	0.0210364	0.0216895	0.332102	-0.021475	0.0635477	1.02126	0.978754	1.06561
eqtl-a-ENSG00000143162	cardiac function	ENSG00000143162 || id:eqtl-a-ENSG00000143162	Inverse variance weighted	4	0.0193935	0.011825	0.100994	-0.00378338	0.0425705	1.01958	0.996224	1.04349
eqtl-a-ENSG00000143409	cardiac function	ENSG00000143409 || id:eqtl-a-ENSG00000143409	Inverse variance weighted	3	0.0217301	0.0297389	0.464963	-0.036558	0.0800183	1.02197	0.964102	1.08331
eqtl-a-ENSG00000143416	cardiac function	ENSG00000143416 || id:eqtl-a-ENSG00000143416	Inverse variance weighted	8	0.0267938	0.0233694	0.251576	-0.0190103	0.0725979	1.02716	0.981169	1.0753
bbj-a-39	cardiac function	Mean corpuscular hemoglobin concentration || id:bbj-a-39	Inverse variance weighted	18	0.0210364	0.0216895	0.332102	-0.021475	0.0635477	1.02126	0.978754	1.06561
eqtl-a-ENSG00000143595	cardiac function	ENSG00000143595 || id:eqtl-a-ENSG00000143595	Inverse variance weighted	7	0.00926623	0.0062359	0.137293	-0.00295615	0.0214886	1.00931	0.997048	1.02172
eqtl-a-ENSG00000143811	cardiac function	ENSG00000143811 || id:eqtl-a-ENSG00000143811	Inverse variance weighted	4	-1.5535e-05	0.00781532	0.998414	-0.0153336	0.0153025	0.999984	0.984783	1.01542
eqtl-a-ENSG00000143995	cardiac function	ENSG00000143995 || id:eqtl-a-ENSG00000143995	Inverse variance weighted	6	-0.0185282	0.0121973	0.12875	-0.0424349	0.00537841	0.981642	0.958453	1.00539
bbj-a-4	cardiac function	Albumin/globulin ratio || id:bbj-a-4	Inverse variance weighted	19	-0.03919	0.0265947	0.140588	-0.0913157	0.0129356	0.961568	0.91273	1.01302
eqtl-a-ENSG00000144677	cardiac function	ENSG00000144677 || id:eqtl-a-ENSG00000144677	Inverse variance weighted	11	0.00844581	0.00558335	0.130362	-0.00249756	0.0193892	1.00848	0.997506	1.01958
eqtl-a-ENSG00000144802	cardiac function	ENSG00000144802 || id:eqtl-a-ENSG00000144802	Inverse variance weighted	4	-0.00381217	0.00947494	0.687433	-0.0223831	0.0147587	0.996195	0.977866	1.01487
eqtl-a-ENSG00000145335	cardiac function	ENSG00000145335 || id:eqtl-a-ENSG00000145335	Inverse variance weighted	6	0.00142854	0.00934075	0.878448	-0.0168793	0.0197364	1.00143	0.983262	1.01993
bbj-a-4	cardiac function	Albumin/globulin ratio || id:bbj-a-4	Inverse variance weighted	19	-0.03919	0.0265947	0.140588	-0.0913157	0.0129356	0.961568	0.91273	1.01302
eqtl-a-ENSG00000145936	cardiac function	ENSG00000145936 || id:eqtl-a-ENSG00000145936	Inverse variance weighted	4	0.0038592	0.00807143	0.632557	-0.0119608	0.0196792	1.00387	0.98811	1.01987
eqtl-a-ENSG00000146007	cardiac function	ENSG00000146007 || id:eqtl-a-ENSG00000146007	Inverse variance weighted	6	0.00105274	0.0086383	0.903003	-0.0158783	0.0179838	1.00105	0.984247	1.01815
eqtl-a-ENSG00000146072	cardiac function	ENSG00000146072 || id:eqtl-a-ENSG00000146072	Inverse variance weighted	5	-0.0230381	0.0222834	0.301197	-0.0667134	0.0206373	0.977225	0.935463	1.02085
eqtl-a-ENSG00000146530	cardiac function	ENSG00000146530 || id:eqtl-a-ENSG00000146530	Inverse variance weighted	4	0.00444198	0.00757126	0.557412	-0.0103977	0.0192816	1.00445	0.989656	1.01947
bbj-a-40	cardiac function	Mean corpuscular volume || id:bbj-a-40	Inverse variance weighted	41	0.0153091	0.0114404	0.180845	-0.00711415	0.0377324	1.01543	0.992911	1.03845
eqtl-a-ENSG00000146859	cardiac function	ENSG00000146859 || id:eqtl-a-ENSG00000146859	Inverse variance weighted	4	-0.00267826	0.00656793	0.683437	-0.0155514	0.0101949	0.997325	0.984569	1.01025
eqtl-a-ENSG00000147454	cardiac function	ENSG00000147454 || id:eqtl-a-ENSG00000147454	Inverse variance weighted	4	0.0105827	0.00865578	0.221476	-0.00638266	0.027548	1.01064	0.993638	1.02793
eqtl-a-ENSG00000147535	cardiac function	ENSG00000147535 || id:eqtl-a-ENSG00000147535	Inverse variance weighted	4	-0.0158502	0.0320733	0.621175	-0.0787139	0.0470135	0.984275	0.924304	1.04814
eqtl-a-ENSG00000147862	cardiac function	ENSG00000147862 || id:eqtl-a-ENSG00000147862	Inverse variance weighted	6	0.00363318	0.00747351	0.626868	-0.0110149	0.0182813	1.00364	0.989046	1.01845
eqtl-a-ENSG00000147872	cardiac function	ENSG00000147872 || id:eqtl-a-ENSG00000147872	Inverse variance weighted	4	0.0107103	0.00735868	0.145539	-0.00371266	0.0251334	1.01077	0.996294	1.02545
eqtl-a-ENSG00000147894	cardiac function	ENSG00000147894 || id:eqtl-a-ENSG00000147894	Inverse variance weighted	3	0.00219086	0.00856745	0.798168	-0.0146013	0.0189831	1.00219	0.985505	1.01916
eqtl-a-ENSG00000148175	cardiac function	ENSG00000148175 || id:eqtl-a-ENSG00000148175	Inverse variance weighted	4	0.0263063	0.0147955	0.0754057	-0.00269295	0.0553056	1.02666	0.997311	1.05686
eqtl-a-ENSG00000148180	cardiac function	ENSG00000148180 || id:eqtl-a-ENSG00000148180	Inverse variance weighted	5	0.0273676	0.0141814	0.0536283	-0.000427894	0.0551631	1.02775	0.999572	1.05671
bbj-a-40	cardiac function	Mean corpuscular volume || id:bbj-a-40	Inverse variance weighted	41	0.0153091	0.0114404	0.180845	-0.00711415	0.0377324	1.01543	0.992911	1.03845
eqtl-a-ENSG00000148341	cardiac function	ENSG00000148341 || id:eqtl-a-ENSG00000148341	Inverse variance weighted	5	0.00189395	0.00638074	0.766601	-0.0106123	0.0144002	1.0019	0.989444	1.0145
eqtl-a-ENSG00000148346	cardiac function	ENSG00000148346 || id:eqtl-a-ENSG00000148346	Inverse variance weighted	5	0.00297312	0.0128741	0.817364	-0.0222602	0.0282064	1.00298	0.977986	1.02861
eqtl-a-ENSG00000148450	cardiac function	ENSG00000148450 || id:eqtl-a-ENSG00000148450	Inverse variance weighted	4	-0.023574	0.0146751	0.108187	-0.0523372	0.00518916	0.976702	0.949009	1.0052
eqtl-a-ENSG00000149218	cardiac function	ENSG00000149218 || id:eqtl-a-ENSG00000149218	Inverse variance weighted	6	0.0108235	0.00938082	0.248584	-0.00756286	0.0292099	1.01088	0.992466	1.02964
bbj-a-41	cardiac function	Monocyte count || id:bbj-a-41	Inverse variance weighted	18	-0.0070219	0.0186575	0.706651	-0.0435906	0.0295468	0.993003	0.957346	1.02999
eqtl-a-ENSG00000149516	cardiac function	ENSG00000149516 || id:eqtl-a-ENSG00000149516	Inverse variance weighted	7	0.00534346	0.0217932	0.80631	-0.0373713	0.0480582	1.00536	0.963318	1.04923
eqtl-a-ENSG00000149557	cardiac function	ENSG00000149557 || id:eqtl-a-ENSG00000149557	Inverse variance weighted	4	-0.000481157	0.0106399	0.96393	-0.0213353	0.020373	0.999519	0.978891	1.02058
eqtl-a-ENSG00000149564	cardiac function	ENSG00000149564 || id:eqtl-a-ENSG00000149564	Inverse variance weighted	6	0.00467946	0.00942324	0.61948	-0.0137901	0.023149	1.00469	0.986305	1.02342
eqtl-a-ENSG00000149573	cardiac function	ENSG00000149573 || id:eqtl-a-ENSG00000149573	Inverse variance weighted	6	0.00559304	0.00682545	0.412536	-0.00778484	0.0189709	1.00561	0.992245	1.01915
eqtl-a-ENSG00000149577	cardiac function	ENSG00000149577 || id:eqtl-a-ENSG00000149577	Inverse variance weighted	4	0.0179279	0.0105705	0.0898801	-0.0027903	0.0386462	1.01809	0.997214	1.0394
eqtl-a-ENSG00000149591	cardiac function	ENSG00000149591 || id:eqtl-a-ENSG00000149591	Inverse variance weighted	6	0.00697815	0.00556196	0.209616	-0.00392329	0.0178796	1.007	0.996084	1.01804
eqtl-a-ENSG00000149798	cardiac function	ENSG00000149798 || id:eqtl-a-ENSG00000149798	Inverse variance weighted	4	-0.00213316	0.0133634	0.873175	-0.0283255	0.0240592	0.997869	0.972072	1.02435
eqtl-a-ENSG00000150403	cardiac function	ENSG00000150403 || id:eqtl-a-ENSG00000150403	Inverse variance weighted	4	-0.000415024	0.00619418	0.94658	-0.0125556	0.0117256	0.999585	0.987523	1.01179
eqtl-a-ENSG00000150681	cardiac function	ENSG00000150681 || id:eqtl-a-ENSG00000150681	Inverse variance weighted	7	-0.0149303	0.0134035	0.265317	-0.0412012	0.0113405	0.985181	0.959636	1.01141
bbj-a-41	cardiac function	Monocyte count || id:bbj-a-41	Inverse variance weighted	18	-0.0070219	0.0186575	0.706651	-0.0435906	0.0295468	0.993003	0.957346	1.02999
eqtl-a-ENSG00000151023	cardiac function	ENSG00000151023 || id:eqtl-a-ENSG00000151023	Inverse variance weighted	7	0.00463951	0.0137226	0.735294	-0.0222568	0.0315358	1.00465	0.977989	1.03204
eqtl-a-ENSG00000151136	cardiac function	ENSG00000151136 || id:eqtl-a-ENSG00000151136	Inverse variance weighted	4	0.00167835	0.00650315	0.796343	-0.0110678	0.0144245	1.00168	0.988993	1.01453
eqtl-a-ENSG00000151150	cardiac function	ENSG00000151150 || id:eqtl-a-ENSG00000151150	Inverse variance weighted	4	0.01079	0.0071996	0.133953	-0.00332121	0.0249012	1.01085	0.996684	1.02521
eqtl-a-ENSG00000151376	cardiac function	ENSG00000151376 || id:eqtl-a-ENSG00000151376	Inverse variance weighted	4	0.00713879	0.00562588	0.20447	-0.00388794	0.0181655	1.00716	0.99612	1.01833
eqtl-a-ENSG00000151789	cardiac function	ENSG00000151789 || id:eqtl-a-ENSG00000151789	Inverse variance weighted	4	0.0192297	0.0178069	0.280187	-0.0156719	0.0541313	1.01942	0.98445	1.05562
bbj-a-42	cardiac function	Non-albumin protein || id:bbj-a-42	Inverse variance weighted	21	-0.0086798	0.0254049	0.732608	-0.0584734	0.0411138	0.991358	0.943203	1.04197
eqtl-a-ENSG00000152268	cardiac function	ENSG00000152268 || id:eqtl-a-ENSG00000152268	Inverse variance weighted	3	0.0111365	0.013535	0.410627	-0.0153922	0.0376652	1.0112	0.984726	1.03838
eqtl-a-ENSG00000152492	cardiac function	ENSG00000152492 || id:eqtl-a-ENSG00000152492	Inverse variance weighted	6	-0.0269343	0.0145581	0.0642962	-0.0554683	0.00159965	0.973425	0.946042	1.0016
eqtl-a-ENSG00000152952	cardiac function	ENSG00000152952 || id:eqtl-a-ENSG00000152952	Inverse variance weighted	6	0.0212242	0.00954994	0.0262532	0.00250634	0.0399421	1.02145	1.00251	1.04075
eqtl-a-ENSG00000153048	cardiac function	ENSG00000153048 || id:eqtl-a-ENSG00000153048	Inverse variance weighted	7	0.000608221	0.00644366	0.924799	-0.0120214	0.0132378	1.00061	0.988051	1.01333
eqtl-a-ENSG00000153064	cardiac function	ENSG00000153064 || id:eqtl-a-ENSG00000153064	Inverse variance weighted	4	0.0405022	0.0244929	0.0982019	-0.00750378	0.0885082	1.04133	0.992524	1.09254
eqtl-a-ENSG00000153071	cardiac function	ENSG00000153071 || id:eqtl-a-ENSG00000153071	Inverse variance weighted	7	-0.00356437	0.0100839	0.723734	-0.0233288	0.0162	0.996442	0.976941	1.01633
eqtl-a-ENSG00000153162	cardiac function	ENSG00000153162 || id:eqtl-a-ENSG00000153162	Inverse variance weighted	8	0.00150939	0.0121059	0.900775	-0.0222181	0.0252369	1.00151	0.978027	1.02556
bbj-a-42	cardiac function	Non-albumin protein || id:bbj-a-42	Inverse variance weighted	21	-0.0086798	0.0254049	0.732608	-0.0584734	0.0411138	0.991358	0.943203	1.04197
eqtl-a-ENSG00000153208	cardiac function	ENSG00000153208 || id:eqtl-a-ENSG00000153208	Inverse variance weighted	4	0.000715967	0.00501178	0.886403	-0.00910712	0.0105391	1.00072	0.990934	1.01059
eqtl-a-ENSG00000153786	cardiac function	ENSG00000153786 || id:eqtl-a-ENSG00000153786	Inverse variance weighted	4	-0.0170596	0.0227781	0.453889	-0.0617046	0.0275854	0.983085	0.940161	1.02797
eqtl-a-ENSG00000153823	cardiac function	ENSG00000153823 || id:eqtl-a-ENSG00000153823	Inverse variance weighted	5	-0.00380765	0.00817418	0.641348	-0.019829	0.0122137	0.9962	0.980366	1.01229
eqtl-a-ENSG00000154146	cardiac function	ENSG00000154146 || id:eqtl-a-ENSG00000154146	Inverse variance weighted	10	0.00997431	0.00540938	0.0651986	-0.000628061	0.0205767	1.01002	0.999372	1.02079
eqtl-a-ENSG00000154229	cardiac function	ENSG00000154229 || id:eqtl-a-ENSG00000154229	Inverse variance weighted	4	0.0112681	0.0150942	0.455355	-0.0183165	0.0408527	1.01133	0.98185	1.0417
bbj-a-43	cardiac function	Sodium || id:bbj-a-43	Inverse variance weighted	7	0.0321689	0.0490615	0.512026	-0.0639916	0.128329	1.03269	0.938013	1.13693
eqtl-a-ENSG00000154760	cardiac function	ENSG00000154760 || id:eqtl-a-ENSG00000154760	Inverse variance weighted	5	0.00279789	0.00917342	0.760366	-0.015182	0.0207778	1.0028	0.984933	1.021
eqtl-a-ENSG00000154917	cardiac function	ENSG00000154917 || id:eqtl-a-ENSG00000154917	Inverse variance weighted	7	0.00110421	0.00752378	0.883319	-0.0136424	0.0158508	1.0011	0.98645	1.01598
eqtl-a-ENSG00000154928	cardiac function	ENSG00000154928 || id:eqtl-a-ENSG00000154928	Inverse variance weighted	4	0.0212595	0.036694	0.562337	-0.0506607	0.0931797	1.02149	0.950601	1.09766
eqtl-a-ENSG00000155465	cardiac function	ENSG00000155465 || id:eqtl-a-ENSG00000155465	Inverse variance weighted	7	-0.0186489	0.00784431	0.017436	-0.0340238	-0.00327408	0.981524	0.966549	0.996731
bbj-a-43	cardiac function	Sodium || id:bbj-a-43	Inverse variance weighted	7	0.0321689	0.0490615	0.512026	-0.0639916	0.128329	1.03269	0.938013	1.13693
eqtl-a-ENSG00000156011	cardiac function	ENSG00000156011 || id:eqtl-a-ENSG00000156011	Inverse variance weighted	3	0.0351842	0.0167074	0.0352128	0.00243765	0.0679308	1.03581	1.00244	1.07029
eqtl-a-ENSG00000156206	cardiac function	ENSG00000156206 || id:eqtl-a-ENSG00000156206	Inverse variance weighted	6	0.0135866	0.00694846	0.050543	-3.23829e-05	0.0272056	1.01368	0.999968	1.02758
eqtl-a-ENSG00000156265	cardiac function	ENSG00000156265 || id:eqtl-a-ENSG00000156265	Inverse variance weighted	9	0.00167633	0.00834761	0.840843	-0.014685	0.0180376	1.00168	0.985422	1.0182
eqtl-a-ENSG00000156381	cardiac function	ENSG00000156381 || id:eqtl-a-ENSG00000156381	Inverse variance weighted	5	-0.00174516	0.00814575	0.830358	-0.0177108	0.0142205	0.998256	0.982445	1.01432
eqtl-a-ENSG00000156395	cardiac function	ENSG00000156395 || id:eqtl-a-ENSG00000156395	Inverse variance weighted	4	0.0204275	0.0214786	0.341574	-0.0216707	0.0625256	1.02064	0.978562	1.06452
eqtl-a-ENSG00000156510	cardiac function	ENSG00000156510 || id:eqtl-a-ENSG00000156510	Inverse variance weighted	5	-0.00397418	0.00593437	0.503056	-0.0156055	0.00765718	0.996034	0.984516	1.00769
eqtl-a-ENSG00000156738	cardiac function	ENSG00000156738 || id:eqtl-a-ENSG00000156738	Inverse variance weighted	4	0.0206115	0.0405303	0.611072	-0.058828	0.100051	1.02083	0.942869	1.10523
eqtl-a-ENSG00000157111	cardiac function	ENSG00000157111 || id:eqtl-a-ENSG00000157111	Inverse variance weighted	4	0.00791057	0.00702372	0.260053	-0.00585591	0.0216771	1.00794	0.994161	1.02191
eqtl-a-ENSG00000157168	cardiac function	ENSG00000157168 || id:eqtl-a-ENSG00000157168	Inverse variance weighted	5	-0.00308536	0.00660284	0.640302	-0.0160269	0.00985621	0.996919	0.984101	1.0099
bbj-a-44	cardiac function	Neutrophil count || id:bbj-a-44	Inverse variance weighted	8	0.00708655	0.0342611	0.836135	-0.0600652	0.0742383	1.00711	0.941703	1.07706
eqtl-a-ENSG00000157445	cardiac function	ENSG00000157445 || id:eqtl-a-ENSG00000157445	Inverse variance weighted	5	0.00884164	0.0127549	0.488188	-0.016158	0.0338413	1.00888	0.983972	1.03442
eqtl-a-ENSG00000157557	cardiac function	ENSG00000157557 || id:eqtl-a-ENSG00000157557	Inverse variance weighted	4	0.0049652	0.00780546	0.524698	-0.0103335	0.0202639	1.00498	0.98972	1.02047
eqtl-a-ENSG00000157601	cardiac function	ENSG00000157601 || id:eqtl-a-ENSG00000157601	Inverse variance weighted	6	-0.0119082	0.00957766	0.213746	-0.0306804	0.00686401	0.988162	0.969785	1.00689
eqtl-a-ENSG00000158270	cardiac function	ENSG00000158270 || id:eqtl-a-ENSG00000158270	Inverse variance weighted	5	0.020034	0.0144417	0.16537	-0.00827172	0.0483398	1.02024	0.991762	1.04953
eqtl-a-ENSG00000158321	cardiac function	ENSG00000158321 || id:eqtl-a-ENSG00000158321	Inverse variance weighted	7	-0.000509442	0.00661747	0.938636	-0.0134797	0.0124608	0.999491	0.986611	1.01254
eqtl-a-ENSG00000158373	cardiac function	ENSG00000158373 || id:eqtl-a-ENSG00000158373	Inverse variance weighted	7	0.00689894	0.00939165	0.462594	-0.0115087	0.0253066	1.00692	0.988557	1.02563
eqtl-a-ENSG00000158406	cardiac function	ENSG00000158406 || id:eqtl-a-ENSG00000158406	Inverse variance weighted	10	0.00187847	0.0115133	0.870395	-0.0206876	0.0244446	1.00188	0.979525	1.02475
eqtl-a-ENSG00000158457	cardiac function	ENSG00000158457 || id:eqtl-a-ENSG00000158457	Inverse variance weighted	11	0.00758295	0.00491404	0.122802	-0.00204856	0.0172145	1.00761	0.997954	1.01736
bbj-a-44	cardiac function	Neutrophil count || id:bbj-a-44	Inverse variance weighted	8	0.00708655	0.0342611	0.836135	-0.0600652	0.0742383	1.00711	0.941703	1.07706
eqtl-a-ENSG00000158473	cardiac function	ENSG00000158473 || id:eqtl-a-ENSG00000158473	Inverse variance weighted	4	-0.0349077	0.0215259	0.104876	-0.0770985	0.00728311	0.965695	0.925799	1.00731
eqtl-a-ENSG00000158488	cardiac function	ENSG00000158488 || id:eqtl-a-ENSG00000158488	Inverse variance weighted	4	-0.000230506	0.00925989	0.98014	-0.0183799	0.0179189	0.99977	0.981788	1.01808
eqtl-a-ENSG00000158578	cardiac function	ENSG00000158578 || id:eqtl-a-ENSG00000158578	Inverse variance weighted	4	-0.013799	0.0192291	0.472997	-0.0514881	0.02389	0.986296	0.949815	1.02418
eqtl-a-ENSG00000158710	cardiac function	ENSG00000158710 || id:eqtl-a-ENSG00000158710	Inverse variance weighted	5	0.0191733	0.0113783	0.0919736	-0.00312815	0.0414747	1.01936	0.996877	1.04235
eqtl-a-ENSG00000158715	cardiac function	ENSG00000158715 || id:eqtl-a-ENSG00000158715	Inverse variance weighted	5	-0.00438259	0.0152842	0.774312	-0.0343396	0.0255744	0.995627	0.966243	1.0259
eqtl-a-ENSG00000158825	cardiac function	ENSG00000158825 || id:eqtl-a-ENSG00000158825	Inverse variance weighted	5	0.00131914	0.0034505	0.702235	-0.00544383	0.00808212	1.00132	0.994571	1.00811
eqtl-a-ENSG00000158850	cardiac function	ENSG00000158850 || id:eqtl-a-ENSG00000158850	Inverse variance weighted	6	0.0222736	0.0236262	0.345809	-0.0240338	0.068581	1.02252	0.976253	1.07099
eqtl-a-ENSG00000159335	cardiac function	ENSG00000159335 || id:eqtl-a-ENSG00000159335	Inverse variance weighted	5	0.00268799	0.0159923	0.86652	-0.0286569	0.0340329	1.00269	0.97175	1.03462
eqtl-a-ENSG00000159339	cardiac function	ENSG00000159339 || id:eqtl-a-ENSG00000159339	Inverse variance weighted	4	2.19941e-05	0.00675719	0.997403	-0.0132221	0.0132661	1.00002	0.986865	1.01335
bbj-a-45	cardiac function	Phosphorus || id:bbj-a-45	Inverse variance weighted	4	0.0322181	0.0352386	0.360568	-0.0368496	0.101286	1.03274	0.963821	1.10659
eqtl-a-ENSG00000159674	cardiac function	ENSG00000159674 || id:eqtl-a-ENSG00000159674	Inverse variance weighted	7	-0.00105801	0.0128067	0.934158	-0.0261591	0.0240431	0.998943	0.97418	1.02433
eqtl-a-ENSG00000159788	cardiac function	ENSG00000159788 || id:eqtl-a-ENSG00000159788	Inverse variance weighted	4	-0.0106703	0.00840601	0.204309	-0.0271461	0.00580543	0.989386	0.973219	1.00582
eqtl-a-ENSG00000160179	cardiac function	ENSG00000160179 || id:eqtl-a-ENSG00000160179	Inverse variance weighted	6	0.0242351	0.0272909	0.374525	-0.029255	0.0777253	1.02453	0.971169	1.08083
eqtl-a-ENSG00000160190	cardiac function	ENSG00000160190 || id:eqtl-a-ENSG00000160190	Inverse variance weighted	4	0.00826314	0.020031	0.67996	-0.0309977	0.0475239	1.0083	0.969478	1.04867
bbj-a-45	cardiac function	Phosphorus || id:bbj-a-45	Inverse variance weighted	4	0.0322181	0.0352386	0.360568	-0.0368496	0.101286	1.03274	0.963821	1.10659
eqtl-a-ENSG00000160683	cardiac function	ENSG00000160683 || id:eqtl-a-ENSG00000160683	Inverse variance weighted	6	0.0164892	0.0295712	0.577111	-0.0414704	0.0744487	1.01663	0.959378	1.07729
eqtl-a-ENSG00000160789	cardiac function	ENSG00000160789 || id:eqtl-a-ENSG00000160789	Inverse variance weighted	4	0.0332142	0.0150539	0.027359	0.00370864	0.0627198	1.03377	1.00372	1.06473
eqtl-a-ENSG00000160856	cardiac function	ENSG00000160856 || id:eqtl-a-ENSG00000160856	Inverse variance weighted	6	0.0028988	0.00857295	0.735263	-0.0139042	0.0197018	1.0029	0.986192	1.0199
ebi-a-GCST90001981	cardiac function	CD40 on CD14+ CD16+ monocyte || id:ebi-a-GCST90001981	Inverse variance weighted	4	0.00179198	0.00416665	0.667139	-0.00637465	0.00995861	1.00179	0.993646	1.01001
eqtl-a-ENSG00000161265	cardiac function	ENSG00000161265 || id:eqtl-a-ENSG00000161265	Inverse variance weighted	4	-0.00277241	0.00782606	0.723149	-0.0181115	0.0125667	0.997231	0.982052	1.01265
bbj-a-46	cardiac function	Pulse pressure || id:bbj-a-46	Inverse variance weighted	9	-0.0123742	0.0632135	0.844804	-0.136273	0.111524	0.987702	0.872605	1.11798
eqtl-a-ENSG00000161911	cardiac function	ENSG00000161911 || id:eqtl-a-ENSG00000161911	Inverse variance weighted	11	0.0130139	0.00584395	0.0259543	0.00155972	0.024468	1.0131	1.00156	1.02477
eqtl-a-ENSG00000161921	cardiac function	ENSG00000161921 || id:eqtl-a-ENSG00000161921	Inverse variance weighted	6	0.00248699	0.0178543	0.889218	-0.0325074	0.0374814	1.00249	0.968015	1.03819
eqtl-a-ENSG00000161944	cardiac function	ENSG00000161944 || id:eqtl-a-ENSG00000161944	Inverse variance weighted	5	0.00291454	0.0258238	0.91014	-0.0477001	0.0535291	1.00292	0.95342	1.05499
eqtl-a-ENSG00000162366	cardiac function	ENSG00000162366 || id:eqtl-a-ENSG00000162366	Inverse variance weighted	8	-0.00915831	0.00789318	0.245934	-0.0246289	0.00631232	0.990883	0.975672	1.00633
eqtl-a-ENSG00000162366	cardiac function	ENSG00000162366 || id:eqtl-a-ENSG00000162366	Inverse variance weighted	8	-0.00915831	0.00789318	0.245934	-0.0246289	0.00631232	0.990883	0.975672	1.00633
bbj-a-46	cardiac function	Pulse pressure || id:bbj-a-46	Inverse variance weighted	9	-0.0123742	0.0632135	0.844804	-0.136273	0.111524	0.987702	0.872605	1.11798
eqtl-a-ENSG00000162614	cardiac function	ENSG00000162614 || id:eqtl-a-ENSG00000162614	Inverse variance weighted	5	0.0066277	0.00929705	0.475918	-0.0115945	0.0248499	1.00665	0.988472	1.02516
eqtl-a-ENSG00000162614	cardiac function	ENSG00000162614 || id:eqtl-a-ENSG00000162614	Inverse variance weighted	5	0.0066277	0.00929705	0.475918	-0.0115945	0.0248499	1.00665	0.988472	1.02516
bbj-a-47	cardiac function	Prothrombin time || id:bbj-a-47	Inverse variance weighted	8	0.0202435	0.0125205	0.105915	-0.00429669	0.0447837	1.02045	0.995713	1.0458
eqtl-a-ENSG00000162711	cardiac function	ENSG00000162711 || id:eqtl-a-ENSG00000162711	Inverse variance weighted	4	0.00468476	0.0072998	0.521026	-0.00962285	0.0189924	1.0047	0.990423	1.01917
eqtl-a-ENSG00000162711	cardiac function	ENSG00000162711 || id:eqtl-a-ENSG00000162711	Inverse variance weighted	4	0.00468476	0.0072998	0.521026	-0.00962285	0.0189924	1.0047	0.990423	1.01917
eqtl-a-ENSG00000162852	cardiac function	ENSG00000162852 || id:eqtl-a-ENSG00000162852	Inverse variance weighted	4	-0.0379481	0.015447	0.0140236	-0.0682243	-0.00767191	0.962763	0.934051	0.992357
eqtl-a-ENSG00000162852	cardiac function	ENSG00000162852 || id:eqtl-a-ENSG00000162852	Inverse variance weighted	4	-0.0379481	0.015447	0.0140236	-0.0682243	-0.00767191	0.962763	0.934051	0.992357
bbj-a-47	cardiac function	Prothrombin time || id:bbj-a-47	Inverse variance weighted	8	0.0202435	0.0125205	0.105915	-0.00429669	0.0447837	1.02045	0.995713	1.0458
eqtl-a-ENSG00000163050	cardiac function	ENSG00000163050 || id:eqtl-a-ENSG00000163050	Inverse variance weighted	4	0.00898766	0.0112499	0.424341	-0.0130621	0.0310374	1.00903	0.987023	1.03152
eqtl-a-ENSG00000163050	cardiac function	ENSG00000163050 || id:eqtl-a-ENSG00000163050	Inverse variance weighted	4	0.00898766	0.0112499	0.424341	-0.0130621	0.0310374	1.00903	0.987023	1.03152
eqtl-a-ENSG00000163131	cardiac function	ENSG00000163131 || id:eqtl-a-ENSG00000163131	Inverse variance weighted	4	-0.0340332	0.0144251	0.0183094	-0.0623065	-0.00575996	0.966539	0.939595	0.994257
eqtl-a-ENSG00000163131	cardiac function	ENSG00000163131 || id:eqtl-a-ENSG00000163131	Inverse variance weighted	4	-0.0340332	0.0144251	0.0183094	-0.0623065	-0.00575996	0.966539	0.939595	0.994257
bbj-a-49	cardiac function	Platelet count || id:bbj-a-49	Inverse variance weighted	40	-0.00117924	0.0171342	0.94513	-0.0347622	0.0324037	0.998821	0.965835	1.03293
eqtl-a-ENSG00000163374	cardiac function	ENSG00000163374 || id:eqtl-a-ENSG00000163374	Inverse variance weighted	4	0.00240448	0.0125557	0.84813	-0.0222047	0.0270137	1.00241	0.97804	1.02738
eqtl-a-ENSG00000163374	cardiac function	ENSG00000163374 || id:eqtl-a-ENSG00000163374	Inverse variance weighted	4	0.00240448	0.0125557	0.84813	-0.0222047	0.0270137	1.00241	0.97804	1.02738
eqtl-a-ENSG00000163430	cardiac function	ENSG00000163430 || id:eqtl-a-ENSG00000163430	Inverse variance weighted	4	0.0160984	0.0104687	0.124107	-0.00442028	0.036617	1.01623	0.995589	1.0373
eqtl-a-ENSG00000163430	cardiac function	ENSG00000163430 || id:eqtl-a-ENSG00000163430	Inverse variance weighted	4	0.0160984	0.0104687	0.124107	-0.00442028	0.036617	1.01623	0.995589	1.0373
eqtl-a-ENSG00000163508	cardiac function	ENSG00000163508 || id:eqtl-a-ENSG00000163508	Inverse variance weighted	4	-0.0168267	0.0137269	0.220267	-0.0437314	0.010078	0.983314	0.957211	1.01013
bbj-a-49	cardiac function	Platelet count || id:bbj-a-49	Inverse variance weighted	40	-0.00117924	0.0171342	0.94513	-0.0347622	0.0324037	0.998821	0.965835	1.03293
eqtl-a-ENSG00000163508	cardiac function	ENSG00000163508 || id:eqtl-a-ENSG00000163508	Inverse variance weighted	4	-0.0168267	0.0137269	0.220267	-0.0437314	0.010078	0.983314	0.957211	1.01013
eqtl-a-ENSG00000163599	cardiac function	ENSG00000163599 || id:eqtl-a-ENSG00000163599	Inverse variance weighted	4	0.0188443	0.0139943	0.17812	-0.00858457	0.0462731	1.01902	0.991452	1.04736
eqtl-a-ENSG00000163599	cardiac function	ENSG00000163599 || id:eqtl-a-ENSG00000163599	Inverse variance weighted	4	0.0188443	0.0139943	0.17812	-0.00858457	0.0462731	1.01902	0.991452	1.04736
bbj-a-5	cardiac function	Alkaline phosphatase || id:bbj-a-5	Inverse variance weighted	17	-0.00910959	0.0162777	0.575728	-0.0410139	0.0227947	0.990932	0.959816	1.02306
eqtl-a-ENSG00000163735	cardiac function	ENSG00000163735 || id:eqtl-a-ENSG00000163735	Inverse variance weighted	8	0.0103397	0.0078807	0.189509	-0.00510642	0.0257859	1.01039	0.994907	1.02612
eqtl-a-ENSG00000163735	cardiac function	ENSG00000163735 || id:eqtl-a-ENSG00000163735	Inverse variance weighted	8	0.0103397	0.0078807	0.189509	-0.00510642	0.0257859	1.01039	0.994907	1.02612
eqtl-a-ENSG00000163736	cardiac function	ENSG00000163736 || id:eqtl-a-ENSG00000163736	Inverse variance weighted	11	0.00856104	0.00468947	0.067912	-0.000630309	0.0177524	1.0086	0.99937	1.01791
eqtl-a-ENSG00000163736	cardiac function	ENSG00000163736 || id:eqtl-a-ENSG00000163736	Inverse variance weighted	11	0.00856104	0.00468947	0.067912	-0.000630309	0.0177524	1.0086	0.99937	1.01791
eqtl-a-ENSG00000163751	cardiac function	ENSG00000163751 || id:eqtl-a-ENSG00000163751	Inverse variance weighted	6	0.00110139	0.0108519	0.91916	-0.0201684	0.0223712	1.0011	0.980034	1.02262
eqtl-a-ENSG00000163751	cardiac function	ENSG00000163751 || id:eqtl-a-ENSG00000163751	Inverse variance weighted	6	0.00110139	0.0108519	0.91916	-0.0201684	0.0223712	1.0011	0.980034	1.02262
eqtl-a-ENSG00000163823	cardiac function	ENSG00000163823 || id:eqtl-a-ENSG00000163823	Inverse variance weighted	4	-0.0144003	0.0128536	0.262574	-0.0395935	0.0107928	0.985703	0.96118	1.01085
eqtl-a-ENSG00000163823	cardiac function	ENSG00000163823 || id:eqtl-a-ENSG00000163823	Inverse variance weighted	4	-0.0144003	0.0128536	0.262574	-0.0395935	0.0107928	0.985703	0.96118	1.01085
bbj-a-5	cardiac function	Alkaline phosphatase || id:bbj-a-5	Inverse variance weighted	17	-0.00910959	0.0162777	0.575728	-0.0410139	0.0227947	0.990932	0.959816	1.02306
eqtl-a-ENSG00000164047	cardiac function	ENSG00000164047 || id:eqtl-a-ENSG00000164047	Inverse variance weighted	4	0.00860363	0.0152132	0.571709	-0.0212143	0.0384215	1.00864	0.979009	1.03917
ebi-a-GCST90002073	cardiac function	SSC-A on monocyte || id:ebi-a-GCST90002073	Inverse variance weighted	3	-0.0028397	0.0134905	0.83328	-0.0292811	0.0236017	0.997164	0.971143	1.02388
eqtl-a-ENSG00000164047	cardiac function	ENSG00000164047 || id:eqtl-a-ENSG00000164047	Inverse variance weighted	4	0.00860363	0.0152132	0.571709	-0.0212143	0.0384215	1.00864	0.979009	1.03917
bbj-a-50	cardiac function	Red blood cell count || id:bbj-a-50	Inverse variance weighted	21	-0.0339913	0.0167061	0.0418846	-0.0667353	-0.00124736	0.96658	0.935443	0.998753
eqtl-a-ENSG00000164068	cardiac function	ENSG00000164068 || id:eqtl-a-ENSG00000164068	Inverse variance weighted	4	-0.0227615	0.0151173	0.132153	-0.0523914	0.00686829	0.977496	0.948957	1.00689
eqtl-a-ENSG00000164068	cardiac function	ENSG00000164068 || id:eqtl-a-ENSG00000164068	Inverse variance weighted	4	-0.0227615	0.0151173	0.132153	-0.0523914	0.00686829	0.977496	0.948957	1.00689
eqtl-a-ENSG00000164116	cardiac function	ENSG00000164116 || id:eqtl-a-ENSG00000164116	Inverse variance weighted	4	0.0146358	0.00859408	0.0885654	-0.00220856	0.0314802	1.01474	0.997794	1.03198
eqtl-a-ENSG00000164116	cardiac function	ENSG00000164116 || id:eqtl-a-ENSG00000164116	Inverse variance weighted	4	0.0146358	0.00859408	0.0885654	-0.00220856	0.0314802	1.01474	0.997794	1.03198
eqtl-a-ENSG00000164124	cardiac function	ENSG00000164124 || id:eqtl-a-ENSG00000164124	Inverse variance weighted	5	0.00154698	0.00621617	0.803466	-0.0106367	0.0137307	1.00155	0.98942	1.01383
eqtl-a-ENSG00000164124	cardiac function	ENSG00000164124 || id:eqtl-a-ENSG00000164124	Inverse variance weighted	5	0.00154698	0.00621617	0.803466	-0.0106367	0.0137307	1.00155	0.98942	1.01383
eqtl-a-ENSG00000164125	cardiac function	ENSG00000164125 || id:eqtl-a-ENSG00000164125	Inverse variance weighted	5	-0.0364033	0.0210954	0.0844092	-0.0777502	0.00494356	0.964251	0.925195	1.00496
eqtl-a-ENSG00000164125	cardiac function	ENSG00000164125 || id:eqtl-a-ENSG00000164125	Inverse variance weighted	5	-0.0364033	0.0210954	0.0844092	-0.0777502	0.00494356	0.964251	0.925195	1.00496
eqtl-a-ENSG00000164181	cardiac function	ENSG00000164181 || id:eqtl-a-ENSG00000164181	Inverse variance weighted	4	0.0152959	0.00850155	0.071988	-0.0013671	0.031959	1.01541	0.998634	1.03248
eqtl-a-ENSG00000164181	cardiac function	ENSG00000164181 || id:eqtl-a-ENSG00000164181	Inverse variance weighted	4	0.0152959	0.00850155	0.071988	-0.0013671	0.031959	1.01541	0.998634	1.03248
bbj-a-107	cardiac function	Colorectal cancer || id:bbj-a-107	Inverse variance weighted	5	-0.00734893	0.0120225	0.541024	-0.030913	0.0162151	0.992678	0.96956	1.01635
bbj-a-50	cardiac function	Red blood cell count || id:bbj-a-50	Inverse variance weighted	21	-0.0339913	0.0167061	0.0418846	-0.0667353	-0.00124736	0.96658	0.935443	0.998753
eqtl-a-ENSG00000164265	cardiac function	ENSG00000164265 || id:eqtl-a-ENSG00000164265	Inverse variance weighted	4	-0.00016541	0.00698746	0.981114	-0.0138608	0.01353	0.999835	0.986235	1.01362
eqtl-a-ENSG00000164265	cardiac function	ENSG00000164265 || id:eqtl-a-ENSG00000164265	Inverse variance weighted	4	-0.00016541	0.00698746	0.981114	-0.0138608	0.01353	0.999835	0.986235	1.01362
eqtl-a-ENSG00000164512	cardiac function	ENSG00000164512 || id:eqtl-a-ENSG00000164512	Inverse variance weighted	5	0.0130658	0.00547011	0.0169132	0.00234443	0.0237873	1.01315	1.00235	1.02407
eqtl-a-ENSG00000164512	cardiac function	ENSG00000164512 || id:eqtl-a-ENSG00000164512	Inverse variance weighted	5	0.0130658	0.00547011	0.0169132	0.00234443	0.0237873	1.01315	1.00235	1.02407
eqtl-a-ENSG00000164683	cardiac function	ENSG00000164683 || id:eqtl-a-ENSG00000164683	Inverse variance weighted	6	-0.0111249	0.017143	0.516374	-0.0447252	0.0224754	0.988937	0.95626	1.02273
eqtl-a-ENSG00000164683	cardiac function	ENSG00000164683 || id:eqtl-a-ENSG00000164683	Inverse variance weighted	6	-0.0111249	0.017143	0.516374	-0.0447252	0.0224754	0.988937	0.95626	1.02273
eqtl-a-ENSG00000164821	cardiac function	ENSG00000164821 || id:eqtl-a-ENSG00000164821	Inverse variance weighted	5	0.0106738	0.0195282	0.584665	-0.0276015	0.0489491	1.01073	0.972776	1.05017
eqtl-a-ENSG00000164821	cardiac function	ENSG00000164821 || id:eqtl-a-ENSG00000164821	Inverse variance weighted	5	0.0106738	0.0195282	0.584665	-0.0276015	0.0489491	1.01073	0.972776	1.05017
eqtl-a-ENSG00000164849	cardiac function	ENSG00000164849 || id:eqtl-a-ENSG00000164849	Inverse variance weighted	4	-0.0169299	0.0150484	0.260578	-0.0464249	0.0125651	0.983213	0.954636	1.01264
eqtl-a-ENSG00000164849	cardiac function	ENSG00000164849 || id:eqtl-a-ENSG00000164849	Inverse variance weighted	4	-0.0169299	0.0150484	0.260578	-0.0464249	0.0125651	0.983213	0.954636	1.01264
eqtl-a-ENSG00000165006	cardiac function	ENSG00000165006 || id:eqtl-a-ENSG00000165006	Inverse variance weighted	4	0.00271675	0.0240144	0.909928	-0.0443514	0.0497849	1.00272	0.956618	1.05105
eqtl-a-ENSG00000165006	cardiac function	ENSG00000165006 || id:eqtl-a-ENSG00000165006	Inverse variance weighted	4	0.00271675	0.0240144	0.909928	-0.0443514	0.0497849	1.00272	0.956618	1.05105
eqtl-a-ENSG00000165025	cardiac function	ENSG00000165025 || id:eqtl-a-ENSG00000165025	Inverse variance weighted	3	0.00680578	0.00683233	0.319195	-0.00658558	0.0201971	1.00683	0.993436	1.0204
eqtl-a-ENSG00000165025	cardiac function	ENSG00000165025 || id:eqtl-a-ENSG00000165025	Inverse variance weighted	3	0.00680578	0.00683233	0.319195	-0.00658558	0.0201971	1.00683	0.993436	1.0204
eqtl-a-ENSG00000165029	cardiac function	ENSG00000165029 || id:eqtl-a-ENSG00000165029	Inverse variance weighted	9	0.0278448	0.0148928	0.0615277	-0.00134506	0.0570347	1.02824	0.998656	1.05869
eqtl-a-ENSG00000165029	cardiac function	ENSG00000165029 || id:eqtl-a-ENSG00000165029	Inverse variance weighted	9	0.0278448	0.0148928	0.0615277	-0.00134506	0.0570347	1.02824	0.998656	1.05869
eqtl-a-ENSG00000165092	cardiac function	ENSG00000165092 || id:eqtl-a-ENSG00000165092	Inverse variance weighted	9	-0.00683742	0.0114559	0.55061	-0.029291	0.0156162	0.993186	0.971134	1.01574
eqtl-a-ENSG00000165092	cardiac function	ENSG00000165092 || id:eqtl-a-ENSG00000165092	Inverse variance weighted	9	-0.00683742	0.0114559	0.55061	-0.029291	0.0156162	0.993186	0.971134	1.01574
bbj-a-52	cardiac function	Systolic blood pressure || id:bbj-a-52	Inverse variance weighted	11	-0.0276413	0.0436094	0.526186	-0.113116	0.057833	0.972737	0.893047	1.05954
ebi-a-GCST90002227	cardiac function	Two-hour glucose || id:ebi-a-GCST90002227	Inverse variance weighted	9	-0.00931332	0.0188085	0.620483	-0.0461779	0.0275513	0.99073	0.954872	1.02793
ebi-a-GCST90002230	cardiac function	Fasting glucose || id:ebi-a-GCST90002230	Inverse variance weighted	5	0.027027	0.025384	0.287	-0.0227256	0.0767795	1.0274	0.977531	1.0798
ebi-a-GCST90002231	cardiac function	Fasting glucose || id:ebi-a-GCST90002231	Inverse variance weighted	5	0.022765	0.0505842	0.65268	-0.0763801	0.12191	1.02303	0.926464	1.12965
ebi-a-GCST90002232	cardiac function	Fasting glucose || id:ebi-a-GCST90002232	Inverse variance weighted	49	0.0534581	0.0251926	0.0338395	0.00408067	0.102836	1.05491	1.00409	1.10831
ebi-a-GCST90002233	cardiac function	Fasting glucose || id:ebi-a-GCST90002233	Inverse variance weighted	8	0.0435103	0.0259167	0.0931816	-0.00728654	0.0943071	1.04447	0.99274	1.0989
ebi-a-GCST90002234	cardiac function	Fasting glucose || id:ebi-a-GCST90002234	Inverse variance weighted	4	0.040914	0.0232037	0.0778583	-0.00456533	0.0863933	1.04176	0.995445	1.09024
ebi-a-GCST90002238	cardiac function	Fasting insulin || id:ebi-a-GCST90002238	Inverse variance weighted	28	-0.132732	0.0578445	0.0217542	-0.246107	-0.0193567	0.8757	0.781838	0.980829
bbj-a-52	cardiac function	Systolic blood pressure || id:bbj-a-52	Inverse variance weighted	11	-0.0276413	0.0436094	0.526186	-0.113116	0.057833	0.972737	0.893047	1.05954
ebi-a-GCST90002243	cardiac function	Glycated hemoglobin levels || id:ebi-a-GCST90002243	Inverse variance weighted	12	-0.0959668	0.0501549	0.0556956	-0.19427	0.00233671	0.908494	0.823435	1.00234
ebi-a-GCST90002244	cardiac function	Glycated hemoglobin levels || id:ebi-a-GCST90002244	Inverse variance weighted	49	0.038855	0.0396737	0.3274	-0.0389054	0.116616	1.03962	0.961842	1.12369
ebi-a-GCST90002245	cardiac function	Glycated hemoglobin levels || id:ebi-a-GCST90002245	Inverse variance weighted	4	0.0267682	0.0461116	0.561572	-0.0636105	0.117147	1.02713	0.93837	1.12428
eqtl-a-ENSG00000165682	cardiac function	ENSG00000165682 || id:eqtl-a-ENSG00000165682	Inverse variance weighted	14	-0.00465294	0.00438664	0.288823	-0.0132508	0.00394487	0.995358	0.986837	1.00395
eqtl-a-ENSG00000165682	cardiac function	ENSG00000165682 || id:eqtl-a-ENSG00000165682	Inverse variance weighted	14	-0.00465294	0.00438664	0.288823	-0.0132508	0.00394487	0.995358	0.986837	1.00395
ebi-a-GCST90002250	cardiac function	Stool frequency || id:ebi-a-GCST90002250	Inverse variance weighted	6	-0.116338	0.0874816	0.183566	-0.287802	0.0551261	0.890174	0.74991	1.05667
ebi-a-GCST90002283	cardiac function	Facial pigmentation measurement (UV light) || id:ebi-a-GCST90002283	Inverse variance weighted	8	0.000846108	0.00111269	0.447006	-0.00133476	0.00302698	1.00085	0.998666	1.00303
ebi-a-GCST90002284	cardiac function	Facial pigmentation measurement (polar light) || id:ebi-a-GCST90002284	Inverse variance weighted	5	0.00208619	0.00192414	0.278266	-0.00168511	0.0058575	1.00209	0.998316	1.00587
ebi-a-GCST90002292	cardiac function	Basophil count || id:ebi-a-GCST90002292	Inverse variance weighted	81	0.0112343	0.0213252	0.598327	-0.0305631	0.0530317	1.0113	0.969899	1.05446
bbj-a-53	cardiac function	Total bilirubin || id:bbj-a-53	Inverse variance weighted	5	-0.0131375	0.0205628	0.522889	-0.0534406	0.0271656	0.986948	0.947962	1.02754
ebi-a-GCST90002293	cardiac function	Basophil count || id:ebi-a-GCST90002293	Inverse variance weighted	13	0.0163395	0.0191425	0.393343	-0.0211798	0.0538588	1.01647	0.979043	1.05534
ebi-a-GCST90002298	cardiac function	Eosinophil counts || id:ebi-a-GCST90002298	Inverse variance weighted	206	-0.00365121	0.0113693	0.7481	-0.0259351	0.0186326	0.996355	0.974398	1.01881
ebi-a-GCST90002299	cardiac function	Eosinophil counts || id:ebi-a-GCST90002299	Inverse variance weighted	19	0.00938676	0.0200455	0.63959	-0.0299025	0.048676	1.00943	0.97054	1.04988
eqtl-a-ENSG00000166002	cardiac function	ENSG00000166002 || id:eqtl-a-ENSG00000166002	Inverse variance weighted	4	-0.00186068	0.00565511	0.742136	-0.0129447	0.00922334	0.998141	0.987139	1.00927
eqtl-a-ENSG00000166002	cardiac function	ENSG00000166002 || id:eqtl-a-ENSG00000166002	Inverse variance weighted	4	-0.00186068	0.00565511	0.742136	-0.0129447	0.00922334	0.998141	0.987139	1.00927
eqtl-a-ENSG00000166068	cardiac function	ENSG00000166068 || id:eqtl-a-ENSG00000166068	Inverse variance weighted	4	-0.00758007	0.0128109	0.554058	-0.0326894	0.0175292	0.992449	0.967839	1.01768
eqtl-a-ENSG00000166068	cardiac function	ENSG00000166068 || id:eqtl-a-ENSG00000166068	Inverse variance weighted	4	-0.00758007	0.0128109	0.554058	-0.0326894	0.0175292	0.992449	0.967839	1.01768
eqtl-a-ENSG00000166086	cardiac function	ENSG00000166086 || id:eqtl-a-ENSG00000166086	Inverse variance weighted	10	0.00190087	0.00547212	0.728311	-0.00882449	0.0126262	1.0019	0.991214	1.01271
eqtl-a-ENSG00000166086	cardiac function	ENSG00000166086 || id:eqtl-a-ENSG00000166086	Inverse variance weighted	10	0.00190087	0.00547212	0.728311	-0.00882449	0.0126262	1.0019	0.991214	1.01271
eqtl-a-ENSG00000166091	cardiac function	ENSG00000166091 || id:eqtl-a-ENSG00000166091	Inverse variance weighted	8	0.0103355	0.00639368	0.105984	-0.00219616	0.0228671	1.01039	0.997806	1.02313
eqtl-a-ENSG00000166091	cardiac function	ENSG00000166091 || id:eqtl-a-ENSG00000166091	Inverse variance weighted	8	0.0103355	0.00639368	0.105984	-0.00219616	0.0228671	1.01039	0.997806	1.02313
ebi-a-GCST90002304	cardiac function	Hematocrit || id:ebi-a-GCST90002304	Inverse variance weighted	227	0.00983176	0.0136504	0.471368	-0.016923	0.0365865	1.00988	0.983219	1.03726
ebi-a-GCST90002305	cardiac function	Hematocrit || id:ebi-a-GCST90002305	Inverse variance weighted	23	0.0159117	0.0234912	0.498186	-0.030131	0.0619544	1.01604	0.970318	1.06391
eqtl-a-ENSG00000166165	cardiac function	ENSG00000166165 || id:eqtl-a-ENSG00000166165	Inverse variance weighted	6	0.00309721	0.00861032	0.719065	-0.013779	0.0199734	1.0031	0.986315	1.02017
eqtl-a-ENSG00000166165	cardiac function	ENSG00000166165 || id:eqtl-a-ENSG00000166165	Inverse variance weighted	6	0.00309721	0.00861032	0.719065	-0.013779	0.0199734	1.0031	0.986315	1.02017
eqtl-a-ENSG00000166169	cardiac function	ENSG00000166169 || id:eqtl-a-ENSG00000166169	Inverse variance weighted	3	-0.00685355	0.0128138	0.592749	-0.0319686	0.0182615	0.99317	0.968537	1.01843
eqtl-a-ENSG00000166169	cardiac function	ENSG00000166169 || id:eqtl-a-ENSG00000166169	Inverse variance weighted	3	-0.00685355	0.0128138	0.592749	-0.0319686	0.0182615	0.99317	0.968537	1.01843
bbj-a-53	cardiac function	Total bilirubin || id:bbj-a-53	Inverse variance weighted	5	-0.0131375	0.0205628	0.522889	-0.0534406	0.0271656	0.986948	0.947962	1.02754
ebi-a-GCST90002310	cardiac function	Hemoglobin concentration || id:ebi-a-GCST90002310	Inverse variance weighted	233	-0.0019028	0.0132145	0.885506	-0.0278031	0.0239975	0.998099	0.97258	1.02429
ebi-a-GCST90002311	cardiac function	Hemoglobin concentration || id:ebi-a-GCST90002311	Inverse variance weighted	17	-0.0101809	0.0294714	0.729756	-0.0679447	0.047583	0.989871	0.934312	1.04873
ebi-a-GCST90002316	cardiac function	Lymphocyte count || id:ebi-a-GCST90002316	Inverse variance weighted	237	-0.000208578	0.0122167	0.986378	-0.0241534	0.0237362	0.999791	0.976136	1.02402
ebi-a-GCST90002317	cardiac function	Lymphocyte counts || id:ebi-a-GCST90002317	Inverse variance weighted	11	-0.0295722	0.0344513	0.390684	-0.0970968	0.0379523	0.970861	0.907468	1.03868
eqtl-a-ENSG00000166405	cardiac function	ENSG00000166405 || id:eqtl-a-ENSG00000166405	Inverse variance weighted	4	-0.0222572	0.0117473	0.0581374	-0.045282	0.000767563	0.977989	0.955728	1.00077
eqtl-a-ENSG00000166405	cardiac function	ENSG00000166405 || id:eqtl-a-ENSG00000166405	Inverse variance weighted	4	-0.0222572	0.0117473	0.0581374	-0.045282	0.000767563	0.977989	0.955728	1.00077
ebi-a-GCST90002322	cardiac function	Mean corpuscular hemoglobin || id:ebi-a-GCST90002322	Inverse variance weighted	225	0.0133324	0.00844308	0.114314	-0.00321601	0.0298809	1.01342	0.996789	1.03033
bbj-a-54	cardiac function	Total cholesterol || id:bbj-a-54	Inverse variance weighted	24	0.03096	0.0193719	0.11	-0.00700887	0.068929	1.03144	0.993016	1.07136
ebi-a-GCST90002323	cardiac function	Mean corpuscular hemoglobin || id:ebi-a-GCST90002323	Inverse variance weighted	47	-0.00746746	0.0123199	0.54443	-0.0316146	0.0166796	0.99256	0.96888	1.01682
eqtl-a-ENSG00000166503	cardiac function	ENSG00000166503 || id:eqtl-a-ENSG00000166503	Inverse variance weighted	4	0.00434776	0.0062043	0.48345	-0.00781268	0.0165082	1.00436	0.992218	1.01665
eqtl-a-ENSG00000166503	cardiac function	ENSG00000166503 || id:eqtl-a-ENSG00000166503	Inverse variance weighted	4	0.00434776	0.0062043	0.48345	-0.00781268	0.0165082	1.00436	0.992218	1.01665
ebi-a-GCST90002325	cardiac function	Mean corpuscular hemoglobin || id:ebi-a-GCST90002325	Inverse variance weighted	9	0.0155827	0.0106764	0.144417	-0.00534314	0.0365085	1.0157	0.994671	1.03718
ebi-a-GCST90002328	cardiac function	Mean corpuscular hemoglobin concentration || id:ebi-a-GCST90002328	Inverse variance weighted	101	-0.0126402	0.0178707	0.479373	-0.0476668	0.0223865	0.987439	0.953451	1.02264
ebi-a-GCST90002329	cardiac function	Mean corpuscular hemoglobin concentration || id:ebi-a-GCST90002329	Inverse variance weighted	28	0.020679	0.0194644	0.288052	-0.0174711	0.0588292	1.02089	0.982681	1.06059
ebi-a-GCST90002334	cardiac function	Mean corpuscular volume || id:ebi-a-GCST90002334	Inverse variance weighted	239	0.0186677	0.00867265	0.0313592	0.00166935	0.0356661	1.01884	1.00167	1.03631
ebi-a-GCST90002335	cardiac function	Mean corpuscular volume || id:ebi-a-GCST90002335	Inverse variance weighted	47	-0.000965909	0.0138994	0.944597	-0.0282087	0.0262769	0.999035	0.972185	1.02663
bbj-a-54	cardiac function	Total cholesterol || id:bbj-a-54	Inverse variance weighted	24	0.03096	0.0193719	0.11	-0.00700887	0.068929	1.03144	0.993016	1.07136
ebi-a-GCST90002336	cardiac function	Mean corpuscular volume || id:ebi-a-GCST90002336	Inverse variance weighted	4	0.00919705	0.0205619	0.654669	-0.0311043	0.0494984	1.00924	0.969374	1.05074
eqtl-a-ENSG00000166831	cardiac function	ENSG00000166831 || id:eqtl-a-ENSG00000166831	Inverse variance weighted	5	0.0110807	0.00632219	0.0796584	-0.00131077	0.0234722	1.01114	0.99869	1.02375
ebi-a-GCST90002337	cardiac function	Mean corpuscular volume || id:ebi-a-GCST90002337	Inverse variance weighted	7	0.0164925	0.0122886	0.179566	-0.00759321	0.0405781	1.01663	0.992436	1.04141
eqtl-a-ENSG00000166831	cardiac function	ENSG00000166831 || id:eqtl-a-ENSG00000166831	Inverse variance weighted	5	0.0110807	0.00632219	0.0796584	-0.00131077	0.0234722	1.01114	0.99869	1.02375
ebi-a-GCST90002339	cardiac function	Monocyte count || id:ebi-a-GCST90002339	Inverse variance weighted	6	-0.0189834	0.0113904	0.0955923	-0.0413086	0.00334185	0.981196	0.959533	1.00335
ebi-a-GCST90002340	cardiac function	Monocyte count || id:ebi-a-GCST90002340	Inverse variance weighted	215	-0.00478282	0.00913245	0.600475	-0.0226824	0.0131168	0.995229	0.977573	1.0132
ebi-a-GCST90002341	cardiac function	Monocyte count || id:ebi-a-GCST90002341	Inverse variance weighted	32	-0.0110631	0.0151044	0.463899	-0.0406678	0.0185416	0.988998	0.960148	1.01871
eqtl-a-ENSG00000166927	cardiac function	ENSG00000166927 || id:eqtl-a-ENSG00000166927	Inverse variance weighted	7	-0.00354542	0.00702012	0.613533	-0.0173049	0.010214	0.996461	0.982844	1.01027
eqtl-a-ENSG00000166927	cardiac function	ENSG00000166927 || id:eqtl-a-ENSG00000166927	Inverse variance weighted	7	-0.00354542	0.00702012	0.613533	-0.0173049	0.010214	0.996461	0.982844	1.01027
eqtl-a-ENSG00000166928	cardiac function	ENSG00000166928 || id:eqtl-a-ENSG00000166928	Inverse variance weighted	7	-0.000533515	0.00465519	0.908757	-0.00965769	0.00859066	0.999467	0.990389	1.00863
eqtl-a-ENSG00000166928	cardiac function	ENSG00000166928 || id:eqtl-a-ENSG00000166928	Inverse variance weighted	7	-0.000533515	0.00465519	0.908757	-0.00965769	0.00859066	0.999467	0.990389	1.00863
eqtl-a-ENSG00000166947	cardiac function	ENSG00000166947 || id:eqtl-a-ENSG00000166947	Inverse variance weighted	5	-0.00885316	0.0139972	0.527062	-0.0362876	0.0185813	0.991186	0.964363	1.01876
eqtl-a-ENSG00000166947	cardiac function	ENSG00000166947 || id:eqtl-a-ENSG00000166947	Inverse variance weighted	5	-0.00885316	0.0139972	0.527062	-0.0362876	0.0185813	0.991186	0.964363	1.01876
ebi-a-GCST90002345	cardiac function	Mean platelet volume || id:ebi-a-GCST90002345	Inverse variance weighted	6	-0.00814386	0.0215257	0.705184	-0.0503343	0.0340466	0.991889	0.950911	1.03463
ebi-a-GCST90002346	cardiac function	Mean platelet volume || id:ebi-a-GCST90002346	Inverse variance weighted	237	-0.00968276	0.00876374	0.269217	-0.0268597	0.00749416	0.990364	0.973498	1.00752
eqtl-a-ENSG00000167034	cardiac function	ENSG00000167034 || id:eqtl-a-ENSG00000167034	Inverse variance weighted	4	0.00165169	0.00992077	0.867773	-0.017793	0.0210964	1.00165	0.982364	1.02132
eqtl-a-ENSG00000167034	cardiac function	ENSG00000167034 || id:eqtl-a-ENSG00000167034	Inverse variance weighted	4	0.00165169	0.00992077	0.867773	-0.017793	0.0210964	1.00165	0.982364	1.02132
eqtl-a-ENSG00000167037	cardiac function	ENSG00000167037 || id:eqtl-a-ENSG00000167037	Inverse variance weighted	5	-0.00044617	0.0128163	0.972229	-0.025566	0.0246737	0.999554	0.974758	1.02498
eqtl-a-ENSG00000167037	cardiac function	ENSG00000167037 || id:eqtl-a-ENSG00000167037	Inverse variance weighted	5	-0.00044617	0.0128163	0.972229	-0.025566	0.0246737	0.999554	0.974758	1.02498
eqtl-a-ENSG00000167065	cardiac function	ENSG00000167065 || id:eqtl-a-ENSG00000167065	Inverse variance weighted	4	0.00903823	0.00643427	0.16011	-0.00357294	0.0216494	1.00908	0.996433	1.02189
eqtl-a-ENSG00000167065	cardiac function	ENSG00000167065 || id:eqtl-a-ENSG00000167065	Inverse variance weighted	4	0.00903823	0.00643427	0.16011	-0.00357294	0.0216494	1.00908	0.996433	1.02189
bbj-a-55	cardiac function	Triglyceride || id:bbj-a-55	Inverse variance weighted	20	-0.0359644	0.0156294	0.0213872	-0.066598	-0.00533084	0.964675	0.935571	0.994683
ebi-a-GCST90002348	cardiac function	Mean platelet volume || id:ebi-a-GCST90002348	Inverse variance weighted	7	-0.027154	0.0119183	0.022706	-0.0505138	-0.00379413	0.973211	0.950741	0.996213
eqtl-a-ENSG00000167100	cardiac function	ENSG00000167100 || id:eqtl-a-ENSG00000167100	Inverse variance weighted	8	0.00891552	0.00613709	0.146299	-0.00311317	0.0209442	1.00896	0.996892	1.02117
eqtl-a-ENSG00000167100	cardiac function	ENSG00000167100 || id:eqtl-a-ENSG00000167100	Inverse variance weighted	8	0.00891552	0.00613709	0.146299	-0.00311317	0.0209442	1.00896	0.996892	1.02117
ebi-a-GCST90002350	cardiac function	Neutrophil count || id:ebi-a-GCST90002350	Inverse variance weighted	12	-0.00322801	0.00642601	0.615432	-0.015823	0.00936698	0.996777	0.984302	1.00941
ebi-a-GCST90002351	cardiac function	Neutrophil count || id:ebi-a-GCST90002351	Inverse variance weighted	195	-0.0187659	0.014323	0.190128	-0.046839	0.00930707	0.981409	0.954241	1.00935
ebi-a-GCST90002352	cardiac function	Neutrophil count || id:ebi-a-GCST90002352	Inverse variance weighted	15	0.0184834	0.027878	0.507324	-0.0361575	0.0731243	1.01866	0.964488	1.07586
ebi-a-GCST90002356	cardiac function	Platelet count || id:ebi-a-GCST90002356	Inverse variance weighted	5	0.0382177	0.0188646	0.0427751	0.00124317	0.0751923	1.03896	1.00124	1.07809
ebi-a-GCST90002357	cardiac function	Platelet count || id:ebi-a-GCST90002357	Inverse variance weighted	302	0.00437017	0.00894772	0.625259	-0.0131674	0.0219077	1.00438	0.986919	1.02215
ebi-a-GCST90002358	cardiac function	Platelet count || id:ebi-a-GCST90002358	Inverse variance weighted	63	-0.00152984	0.0135942	0.910398	-0.0281745	0.0251148	0.998471	0.972219	1.02543
eqtl-a-ENSG00000167377	cardiac function	ENSG00000167377 || id:eqtl-a-ENSG00000167377	Inverse variance weighted	5	0.0061351	0.00794195	0.439823	-0.00943114	0.0217013	1.00615	0.990613	1.02194
ebi-a-GCST90002359	cardiac function	Platelet count || id:ebi-a-GCST90002359	Inverse variance weighted	4	0.0102233	0.0177564	0.564781	-0.0245792	0.0450259	1.01028	0.97572	1.04605
eqtl-a-ENSG00000167377	cardiac function	ENSG00000167377 || id:eqtl-a-ENSG00000167377	Inverse variance weighted	5	0.0061351	0.00794195	0.439823	-0.00943114	0.0217013	1.00615	0.990613	1.02194
bbj-a-107	cardiac function	Colorectal cancer || id:bbj-a-107	Inverse variance weighted	5	-0.00734893	0.0120225	0.541024	-0.030913	0.0162151	0.992678	0.96956	1.01635
bbj-a-55	cardiac function	Triglyceride || id:bbj-a-55	Inverse variance weighted	20	-0.0359644	0.0156294	0.0213872	-0.066598	-0.00533084	0.964675	0.935571	0.994683
ebi-a-GCST90002360	cardiac function	Platelet count || id:ebi-a-GCST90002360	Inverse variance weighted	4	0.0189819	0.016734	0.256655	-0.0138167	0.0517806	1.01916	0.986278	1.05314
ebi-a-GCST90002362	cardiac function	Red blood cell count || id:ebi-a-GCST90002362	Inverse variance weighted	4	-0.0133207	0.0195522	0.49569	-0.0516429	0.0250016	0.986768	0.949668	1.02532
eqtl-a-ENSG00000167483	cardiac function	ENSG00000167483 || id:eqtl-a-ENSG00000167483	Inverse variance weighted	6	0.0255683	0.0161601	0.113607	-0.00610553	0.0572422	1.0259	0.993913	1.05891
ebi-a-GCST90002363	cardiac function	Red blood cell count || id:ebi-a-GCST90002363	Inverse variance weighted	264	-0.00293226	0.00974818	0.763566	-0.0220387	0.0161742	0.997072	0.978202	1.01631
eqtl-a-ENSG00000167483	cardiac function	ENSG00000167483 || id:eqtl-a-ENSG00000167483	Inverse variance weighted	6	0.0255683	0.0161601	0.113607	-0.00610553	0.0572422	1.0259	0.993913	1.05891
ebi-a-GCST90002364	cardiac function	Red blood cell count || id:ebi-a-GCST90002364	Inverse variance weighted	39	-0.0305734	0.0176814	0.0837872	-0.065229	0.00408225	0.969889	0.936853	1.00409
eqtl-a-ENSG00000167553	cardiac function	ENSG00000167553 || id:eqtl-a-ENSG00000167553	Inverse variance weighted	4	0.000870688	0.00939776	0.926183	-0.0175489	0.0192903	1.00087	0.982604	1.01948
eqtl-a-ENSG00000167553	cardiac function	ENSG00000167553 || id:eqtl-a-ENSG00000167553	Inverse variance weighted	4	0.000870688	0.00939776	0.926183	-0.0175489	0.0192903	1.00087	0.982604	1.01948
ebi-a-GCST90002369	cardiac function	Red cell distribution width || id:ebi-a-GCST90002369	Inverse variance weighted	189	0.0161353	0.0110839	0.145462	-0.00558908	0.0378598	1.01627	0.994427	1.03859
eqtl-a-ENSG00000167641	cardiac function	ENSG00000167641 || id:eqtl-a-ENSG00000167641	Inverse variance weighted	4	0.0102609	0.00778924	0.187733	-0.00500603	0.0255278	1.01031	0.995006	1.02586
eqtl-a-ENSG00000167641	cardiac function	ENSG00000167641 || id:eqtl-a-ENSG00000167641	Inverse variance weighted	4	0.0102609	0.00778924	0.187733	-0.00500603	0.0255278	1.01031	0.995006	1.02586
bbj-a-56	cardiac function	Total protein || id:bbj-a-56	Inverse variance weighted	16	-0.0540123	0.0325751	0.0972998	-0.117859	0.00983483	0.94742	0.888821	1.00988
ebi-a-GCST90002373	cardiac function	White blood cell count || id:ebi-a-GCST90002373	Inverse variance weighted	5	-0.0120898	0.00575726	0.0357357	-0.023374	-0.000805565	0.987983	0.976897	0.999195
eqtl-a-ENSG00000167671	cardiac function	ENSG00000167671 || id:eqtl-a-ENSG00000167671	Inverse variance weighted	6	-0.00581228	0.0116111	0.616667	-0.0285701	0.0169455	0.994205	0.971834	1.01709
eqtl-a-ENSG00000167671	cardiac function	ENSG00000167671 || id:eqtl-a-ENSG00000167671	Inverse variance weighted	6	-0.00581228	0.0116111	0.616667	-0.0285701	0.0169455	0.994205	0.971834	1.01709
ebi-a-GCST90002374	cardiac function	White blood cell count || id:ebi-a-GCST90002374	Inverse variance weighted	226	-0.0179071	0.0133045	0.17832	-0.0439839	0.00816968	0.982252	0.956969	1.0082
ebi-a-GCST90002375	cardiac function	White blood cell count || id:ebi-a-GCST90002375	Inverse variance weighted	29	-0.00323186	0.0256678	0.899803	-0.0535408	0.0470771	0.996773	0.947867	1.0482
eqtl-a-ENSG00000167768	cardiac function	ENSG00000167768 || id:eqtl-a-ENSG00000167768	Inverse variance weighted	5	0.00469588	0.0118033	0.690744	-0.0184385	0.0278303	1.00471	0.98173	1.02822
eqtl-a-ENSG00000167768	cardiac function	ENSG00000167768 || id:eqtl-a-ENSG00000167768	Inverse variance weighted	5	0.00469588	0.0118033	0.690744	-0.0184385	0.0278303	1.00471	0.98173	1.02822
ebi-a-GCST90002379	cardiac function	Basophil count || id:ebi-a-GCST90002379	Inverse variance weighted	73	0.0151584	0.0182194	0.405411	-0.0205515	0.0508684	1.01527	0.979658	1.05218
ebi-a-GCST90002380	cardiac function	Basophil percentage of white cells || id:ebi-a-GCST90002380	Inverse variance weighted	71	0.0363271	0.0174568	0.0374368	0.00211172	0.0705424	1.03699	1.00211	1.07309
ebi-a-GCST90002381	cardiac function	Eosinophil counts || id:ebi-a-GCST90002381	Inverse variance weighted	187	-0.00862209	0.0112384	0.442965	-0.0306494	0.0134052	0.991415	0.969816	1.0135
eqtl-a-ENSG00000167851	cardiac function	ENSG00000167851 || id:eqtl-a-ENSG00000167851	Inverse variance weighted	4	0.000802523	0.00800955	0.920189	-0.0148962	0.0165012	1.0008	0.985214	1.01664
eqtl-a-ENSG00000167851	cardiac function	ENSG00000167851 || id:eqtl-a-ENSG00000167851	Inverse variance weighted	4	0.000802523	0.00800955	0.920189	-0.0148962	0.0165012	1.0008	0.985214	1.01664
ebi-a-GCST90002382	cardiac function	Eosinophil percentage of white cells || id:ebi-a-GCST90002382	Inverse variance weighted	183	0.0131429	0.0121318	0.278655	-0.0106354	0.0369212	1.01323	0.989421	1.03761
ebi-a-GCST90002383	cardiac function	Hematocrit || id:ebi-a-GCST90002383	Inverse variance weighted	168	-0.00369229	0.0151109	0.806962	-0.0333096	0.025925	0.996315	0.967239	1.02626
bbj-a-56	cardiac function	Total protein || id:bbj-a-56	Inverse variance weighted	16	-0.0540123	0.0325751	0.0972998	-0.117859	0.00983483	0.94742	0.888821	1.00988
ebi-a-GCST90002384	cardiac function	Hemoglobin || id:ebi-a-GCST90002384	Inverse variance weighted	166	-0.00602326	0.014921	0.68645	-0.0352683	0.0232218	0.993995	0.965346	1.02349
ebi-a-GCST90002385	cardiac function	High light scatter reticulocyte count || id:ebi-a-GCST90002385	Inverse variance weighted	196	-0.00545857	0.0109486	0.618086	-0.0269177	0.0160006	0.994556	0.973441	1.01613
ebi-a-GCST90002386	cardiac function	High light scatter reticulocyte percentage of red cells || id:ebi-a-GCST90002386	Inverse variance weighted	205	-0.0004452	0.0112264	0.968367	-0.022449	0.0215586	0.999555	0.977801	1.02179
ebi-a-GCST90002387	cardiac function	Immature fraction of reticulocytes || id:ebi-a-GCST90002387	Inverse variance weighted	130	-0.0217453	0.0126003	0.0843889	-0.046442	0.00295138	0.978489	0.95462	1.00296
eqtl-a-ENSG00000167992	cardiac function	ENSG00000167992 || id:eqtl-a-ENSG00000167992	Inverse variance weighted	7	0.00796372	0.00879561	0.365243	-0.00927568	0.0252031	1.008	0.990767	1.02552
eqtl-a-ENSG00000167992	cardiac function	ENSG00000167992 || id:eqtl-a-ENSG00000167992	Inverse variance weighted	7	0.00796372	0.00879561	0.365243	-0.00927568	0.0252031	1.008	0.990767	1.02552
eqtl-a-ENSG00000167994	cardiac function	ENSG00000167994 || id:eqtl-a-ENSG00000167994	Inverse variance weighted	6	0.0136364	0.0120711	0.258613	-0.0100229	0.0372958	1.01373	0.990027	1.038
eqtl-a-ENSG00000167994	cardiac function	ENSG00000167994 || id:eqtl-a-ENSG00000167994	Inverse variance weighted	6	0.0136364	0.0120711	0.258613	-0.0100229	0.0372958	1.01373	0.990027	1.038
ebi-a-GCST90002388	cardiac function	Lymphocyte count || id:ebi-a-GCST90002388	Inverse variance weighted	199	-0.0133638	0.0134237	0.319476	-0.0396744	0.0129467	0.986725	0.961102	1.01303
ebi-a-GCST90002389	cardiac function	Lymphocyte percentage of white cells || id:ebi-a-GCST90002389	Inverse variance weighted	156	0.00156919	0.0139878	0.910679	-0.0258469	0.0289853	1.00157	0.974484	1.02941
ebi-a-GCST90002390	cardiac function	Mean corpuscular hemoglobin || id:ebi-a-GCST90002390	Inverse variance weighted	184	-0.00352488	0.0091883	0.701255	-0.0215339	0.0144842	0.996481	0.978696	1.01459
ebi-a-GCST90002391	cardiac function	Mean corpuscular hemoglobin concentration || id:ebi-a-GCST90002391	Inverse variance weighted	88	0.00184051	0.0161601	0.909323	-0.0298333	0.0335143	1.00184	0.970607	1.03408
ebi-a-GCST90002392	cardiac function	Mean corpuscular volume || id:ebi-a-GCST90002392	Inverse variance weighted	197	0.00438831	0.00984494	0.655783	-0.0149078	0.0236844	1.0044	0.985203	1.02397
ebi-a-GCST90002394	cardiac function	Monocyte percentage of white cells || id:ebi-a-GCST90002394	Inverse variance weighted	169	0.00859856	0.0106121	0.41779	-0.0122011	0.0293982	1.00864	0.987873	1.02983
eqtl-a-ENSG00000168159	cardiac function	ENSG00000168159 || id:eqtl-a-ENSG00000168159	Inverse variance weighted	6	-0.0149435	0.0133483	0.262923	-0.0411061	0.0112191	0.985168	0.959727	1.01128
eqtl-a-ENSG00000168159	cardiac function	ENSG00000168159 || id:eqtl-a-ENSG00000168159	Inverse variance weighted	6	-0.0149435	0.0133483	0.262923	-0.0411061	0.0112191	0.985168	0.959727	1.01128
bbj-a-57	cardiac function	Uric acid || id:bbj-a-57	Inverse variance weighted	21	-0.0219849	0.0126976	0.0833773	-0.0468723	0.00290245	0.978255	0.954209	1.00291
ebi-a-GCST90002395	cardiac function	Mean platelet volume || id:ebi-a-GCST90002395	Inverse variance weighted	224	-0.00598678	0.0082086	0.4658	-0.0220756	0.0101021	0.994031	0.978166	1.01015
ebi-a-GCST90002396	cardiac function	Mean reticulocyte volume || id:ebi-a-GCST90002396	Inverse variance weighted	185	0.027594	0.0107562	0.0103054	0.00651189	0.048676	1.02798	1.00653	1.04988
ebi-a-GCST90002397	cardiac function	Mean spheric corpuscular volume || id:ebi-a-GCST90002397	Inverse variance weighted	218	0.0131421	0.00907496	0.14757	-0.00464486	0.030929	1.01323	0.995366	1.03141
eqtl-a-ENSG00000168274	cardiac function	ENSG00000168274 || id:eqtl-a-ENSG00000168274	Inverse variance weighted	10	-0.012203	0.00983432	0.214658	-0.0314783	0.00707227	0.987871	0.969012	1.0071
eqtl-a-ENSG00000168274	cardiac function	ENSG00000168274 || id:eqtl-a-ENSG00000168274	Inverse variance weighted	10	-0.012203	0.00983432	0.214658	-0.0314783	0.00707227	0.987871	0.969012	1.0071
ebi-a-GCST90002398	cardiac function	Neutrophil count || id:ebi-a-GCST90002398	Inverse variance weighted	171	-0.00658897	0.013811	0.633304	-0.0336585	0.0204806	0.993433	0.966902	1.02069
eqtl-a-ENSG00000168280	cardiac function	ENSG00000168280 || id:eqtl-a-ENSG00000168280	Inverse variance weighted	6	0.00164787	0.0193286	0.932058	-0.0362362	0.039532	1.00165	0.964412	1.04032
eqtl-a-ENSG00000168280	cardiac function	ENSG00000168280 || id:eqtl-a-ENSG00000168280	Inverse variance weighted	6	0.00164787	0.0193286	0.932058	-0.0362362	0.039532	1.00165	0.964412	1.04032
ebi-a-GCST90002399	cardiac function	Neutrophil percentage of white cells || id:ebi-a-GCST90002399	Inverse variance weighted	155	-0.000223769	0.0149153	0.98803	-0.0294577	0.0290102	0.999776	0.970972	1.02944
ebi-a-GCST90002400	cardiac function	Plateletcrit || id:ebi-a-GCST90002400	Inverse variance weighted	217	0.00306944	0.00996285	0.758014	-0.0164577	0.0225966	1.00307	0.983677	1.02285
ebi-a-GCST90002401	cardiac function	Platelet distribution width || id:ebi-a-GCST90002401	Inverse variance weighted	155	-0.0165433	0.0112687	0.142084	-0.03863	0.00554339	0.983593	0.962107	1.00556
ebi-a-GCST90002402	cardiac function	Platelet count || id:ebi-a-GCST90002402	Inverse variance weighted	246	0.00602895	0.00933152	0.518225	-0.0122608	0.0243187	1.00605	0.987814	1.02462
ebi-a-GCST90002403	cardiac function	Red blood cell count || id:ebi-a-GCST90002403	Inverse variance weighted	203	-0.0108268	0.0102425	0.290492	-0.0309022	0.00924856	0.989232	0.96957	1.00929
eqtl-a-ENSG00000168461	cardiac function	ENSG00000168461 || id:eqtl-a-ENSG00000168461	Inverse variance weighted	4	0.0155772	0.0240682	0.517496	-0.0315965	0.0627509	1.0157	0.968897	1.06476
eqtl-a-ENSG00000168461	cardiac function	ENSG00000168461 || id:eqtl-a-ENSG00000168461	Inverse variance weighted	4	0.0155772	0.0240682	0.517496	-0.0315965	0.0627509	1.0157	0.968897	1.06476
ebi-a-GCST90002404	cardiac function	Red cell distribution width || id:ebi-a-GCST90002404	Inverse variance weighted	154	0.0143873	0.0114131	0.207455	-0.00798239	0.036757	1.01449	0.992049	1.03744
eqtl-a-ENSG00000168497	cardiac function	ENSG00000168497 || id:eqtl-a-ENSG00000168497	Inverse variance weighted	9	0.00834007	0.00969758	0.389781	-0.0106672	0.0273473	1.00837	0.989389	1.02772
bbj-a-57	cardiac function	Uric acid || id:bbj-a-57	Inverse variance weighted	21	-0.0219849	0.0126976	0.0833773	-0.0468723	0.00290245	0.978255	0.954209	1.00291
ebi-a-GCST90002405	cardiac function	Reticulocyte count || id:ebi-a-GCST90002405	Inverse variance weighted	179	-0.00376556	0.0108759	0.729169	-0.0250822	0.0175511	0.996242	0.97523	1.01771
eqtl-a-ENSG00000168497	cardiac function	ENSG00000168497 || id:eqtl-a-ENSG00000168497	Inverse variance weighted	9	0.00834007	0.00969758	0.389781	-0.0106672	0.0273473	1.00837	0.989389	1.02772
ebi-a-GCST90002406	cardiac function	Reticulocyte fraction of red cells || id:ebi-a-GCST90002406	Inverse variance weighted	173	-0.00511308	0.0110246	0.642798	-0.0267212	0.016495	0.9949	0.973633	1.01663
ebi-a-GCST90002407	cardiac function	White blood cell count || id:ebi-a-GCST90002407	Inverse variance weighted	192	0.0112881	0.0135793	0.405819	-0.0153273	0.0379034	1.01135	0.98479	1.03863
ebi-a-GCST90002409	cardiac function	Childhood body mass index || id:ebi-a-GCST90002409	Inverse variance weighted	12	-0.035332	0.0201657	0.0797592	-0.0748566	0.00419275	0.965285	0.927876	1.0042
eqtl-a-ENSG00000168646	cardiac function	ENSG00000168646 || id:eqtl-a-ENSG00000168646	Inverse variance weighted	4	-0.0161222	0.0073667	0.0286311	-0.030561	-0.00168351	0.984007	0.969901	0.998318
eqtl-a-ENSG00000168646	cardiac function	ENSG00000168646 || id:eqtl-a-ENSG00000168646	Inverse variance weighted	4	-0.0161222	0.0073667	0.0286311	-0.030561	-0.00168351	0.984007	0.969901	0.998318
ebi-a-GCST90002412	cardiac function	Low density lipoprotein cholesterol levels || id:ebi-a-GCST90002412	Inverse variance weighted	159	-0.00889886	0.00994069	0.370682	-0.0283826	0.0105849	0.991141	0.972016	1.01064
eqtl-a-ENSG00000168785	cardiac function	ENSG00000168785 || id:eqtl-a-ENSG00000168785	Inverse variance weighted	5	-0.00783488	0.0208619	0.707245	-0.0487243	0.0330545	0.992196	0.952444	1.03361
eqtl-a-ENSG00000168785	cardiac function	ENSG00000168785 || id:eqtl-a-ENSG00000168785	Inverse variance weighted	5	-0.00783488	0.0208619	0.707245	-0.0487243	0.0330545	0.992196	0.952444	1.03361
bbj-a-58	cardiac function	White blood cell count || id:bbj-a-58	Inverse variance weighted	17	-0.0212335	0.0256065	0.406978	-0.0714223	0.0289552	0.97899	0.931069	1.02938
eqtl-a-ENSG00000169087	cardiac function	ENSG00000169087 || id:eqtl-a-ENSG00000169087	Inverse variance weighted	5	-0.00033223	0.00537107	0.950678	-0.0108595	0.0101951	0.999668	0.989199	1.01025
eqtl-a-ENSG00000169087	cardiac function	ENSG00000169087 || id:eqtl-a-ENSG00000169087	Inverse variance weighted	5	-0.00033223	0.00537107	0.950678	-0.0108595	0.0101951	0.999668	0.989199	1.01025
eqtl-a-ENSG00000169224	cardiac function	ENSG00000169224 || id:eqtl-a-ENSG00000169224	Inverse variance weighted	4	0.00455833	0.0176659	0.796384	-0.0300669	0.0391836	1.00457	0.970381	1.03996
eqtl-a-ENSG00000169224	cardiac function	ENSG00000169224 || id:eqtl-a-ENSG00000169224	Inverse variance weighted	4	0.00455833	0.0176659	0.796384	-0.0300669	0.0391836	1.00457	0.970381	1.03996
bbj-a-58	cardiac function	White blood cell count || id:bbj-a-58	Inverse variance weighted	17	-0.0212335	0.0256065	0.406978	-0.0714223	0.0289552	0.97899	0.931069	1.02938
eqtl-a-ENSG00000169313	cardiac function	ENSG00000169313 || id:eqtl-a-ENSG00000169313	Inverse variance weighted	8	-0.0187711	0.00966261	0.0520584	-0.0377098	0.000167644	0.981404	0.962992	1.00017
eqtl-a-ENSG00000169313	cardiac function	ENSG00000169313 || id:eqtl-a-ENSG00000169313	Inverse variance weighted	8	-0.0187711	0.00966261	0.0520584	-0.0377098	0.000167644	0.981404	0.962992	1.00017
eqtl-a-ENSG00000169398	cardiac function	ENSG00000169398 || id:eqtl-a-ENSG00000169398	Inverse variance weighted	5	0.0239719	0.0127705	0.0604994	-0.00105821	0.049002	1.02426	0.998942	1.05022
eqtl-a-ENSG00000169398	cardiac function	ENSG00000169398 || id:eqtl-a-ENSG00000169398	Inverse variance weighted	5	0.0239719	0.0127705	0.0604994	-0.00105821	0.049002	1.02426	0.998942	1.05022
eqtl-a-ENSG00000169432	cardiac function	ENSG00000169432 || id:eqtl-a-ENSG00000169432	Inverse variance weighted	4	-0.0103744	0.00872799	0.234585	-0.0274812	0.00673249	0.989679	0.972893	1.00676
eqtl-a-ENSG00000169432	cardiac function	ENSG00000169432 || id:eqtl-a-ENSG00000169432	Inverse variance weighted	4	-0.0103744	0.00872799	0.234585	-0.0274812	0.00673249	0.989679	0.972893	1.00676
eqtl-a-ENSG00000169439	cardiac function	ENSG00000169439 || id:eqtl-a-ENSG00000169439	Inverse variance weighted	5	-0.02416	0.0158574	0.127614	-0.0552405	0.00692048	0.97613	0.946258	1.00694
eqtl-a-ENSG00000169439	cardiac function	ENSG00000169439 || id:eqtl-a-ENSG00000169439	Inverse variance weighted	5	-0.02416	0.0158574	0.127614	-0.0552405	0.00692048	0.97613	0.946258	1.00694
eqtl-a-ENSG00000169507	cardiac function	ENSG00000169507 || id:eqtl-a-ENSG00000169507	Inverse variance weighted	6	0.00619172	0.0201593	0.758737	-0.0333205	0.0457039	1.00621	0.967229	1.04676
eqtl-a-ENSG00000169507	cardiac function	ENSG00000169507 || id:eqtl-a-ENSG00000169507	Inverse variance weighted	6	0.00619172	0.0201593	0.758737	-0.0333205	0.0457039	1.00621	0.967229	1.04676
ebi-a-GCST90006934	cardiac function	Type 2 diabetes || id:ebi-a-GCST90006934	Inverse variance weighted	4	0.00256868	0.0173166	0.882077	-0.0313719	0.0365093	1.00257	0.969115	1.03718
ebi-a-GCST90007307	cardiac function	circulating leptin levels || id:ebi-a-GCST90007307	Inverse variance weighted	6	0.0335079	0.0515345	0.515561	-0.0674997	0.134516	1.03408	0.934728	1.14398
eqtl-a-ENSG00000169704	cardiac function	ENSG00000169704 || id:eqtl-a-ENSG00000169704	Inverse variance weighted	8	0.00620496	0.00797904	0.436771	-0.00943395	0.0218439	1.00622	0.99061	1.02208
eqtl-a-ENSG00000169704	cardiac function	ENSG00000169704 || id:eqtl-a-ENSG00000169704	Inverse variance weighted	8	0.00620496	0.00797904	0.436771	-0.00943395	0.0218439	1.00622	0.99061	1.02208
eqtl-a-ENSG00000169877	cardiac function	ENSG00000169877 || id:eqtl-a-ENSG00000169877	Inverse variance weighted	9	0.0033571	0.00889771	0.705951	-0.0140824	0.0207966	1.00336	0.986016	1.02101
eqtl-a-ENSG00000169877	cardiac function	ENSG00000169877 || id:eqtl-a-ENSG00000169877	Inverse variance weighted	9	0.0033571	0.00889771	0.705951	-0.0140824	0.0207966	1.00336	0.986016	1.02101
ebi-a-GCST90007319	cardiac function	circulating leptin levels adjusted for BMI || id:ebi-a-GCST90007319	Inverse variance weighted	5	0.0617401	0.0291422	0.0341261	0.00462134	0.118859	1.06369	1.00463	1.12621
ebi-a-GCST90007321	cardiac function	circulating leptin levels adjusted for BMI || id:ebi-a-GCST90007321	Inverse variance weighted	5	0.0334388	0.0245814	0.173726	-0.0147408	0.0816184	1.034	0.985367	1.08504
ebi-a-GCST90007322	cardiac function	circulating leptin levels adjusted for BMI || id:ebi-a-GCST90007322	Inverse variance weighted	5	0.0611965	0.0294338	0.0376061	0.00350623	0.118887	1.06311	1.00351	1.12624
ebi-a-GCST90007324	cardiac function	circulating leptin levels adjusted for BMI || id:ebi-a-GCST90007324	Inverse variance weighted	5	0.0472645	0.0254406	0.0631927	-0.0025992	0.0971281	1.0484	0.997404	1.102
ebi-a-GCST90007325	cardiac function	circulating leptin levels adjusted for BMI || id:ebi-a-GCST90007325	Inverse variance weighted	4	0.0554556	0.022591	0.0140977	0.0111772	0.0997339	1.05702	1.01124	1.10488
ebi-a-GCST90007526	cardiac function	Low hand grip strength (60 years and older) (EWGSOP) || id:ebi-a-GCST90007526	Inverse variance weighted	6	-0.00588732	0.0339138	0.862182	-0.0723583	0.0605837	0.99413	0.930198	1.06246
eqtl-a-ENSG00000170271	cardiac function	ENSG00000170271 || id:eqtl-a-ENSG00000170271	Inverse variance weighted	6	0.0110569	0.00843863	0.190104	-0.00548283	0.0275966	1.01112	0.994532	1.02798
eqtl-a-ENSG00000170271	cardiac function	ENSG00000170271 || id:eqtl-a-ENSG00000170271	Inverse variance weighted	6	0.0110569	0.00843863	0.190104	-0.00548283	0.0275966	1.01112	0.994532	1.02798
eqtl-a-ENSG00000170315	cardiac function	ENSG00000170315 || id:eqtl-a-ENSG00000170315	Inverse variance weighted	7	0.0150886	0.025638	0.55618	-0.0351619	0.0653392	1.0152	0.965449	1.06752
eqtl-a-ENSG00000170315	cardiac function	ENSG00000170315 || id:eqtl-a-ENSG00000170315	Inverse variance weighted	7	0.0150886	0.025638	0.55618	-0.0351619	0.0653392	1.0152	0.965449	1.06752
bbj-a-6	cardiac function	Alanine aminotransferase || id:bbj-a-6	Inverse variance weighted	12	-0.0103577	0.0763734	0.892123	-0.160049	0.139334	0.989696	0.852102	1.14951
eqtl-a-ENSG00000170448	cardiac function	ENSG00000170448 || id:eqtl-a-ENSG00000170448	Inverse variance weighted	4	0.00214589	0.00393238	0.585274	-0.00556158	0.00985336	1.00215	0.994454	1.0099
eqtl-a-ENSG00000170448	cardiac function	ENSG00000170448 || id:eqtl-a-ENSG00000170448	Inverse variance weighted	4	0.00214589	0.00393238	0.585274	-0.00556158	0.00985336	1.00215	0.994454	1.0099
eqtl-a-ENSG00000170458	cardiac function	ENSG00000170458 || id:eqtl-a-ENSG00000170458	Inverse variance weighted	6	0.00350344	0.00759711	0.644688	-0.0113869	0.0183938	1.00351	0.988678	1.01856
eqtl-a-ENSG00000170458	cardiac function	ENSG00000170458 || id:eqtl-a-ENSG00000170458	Inverse variance weighted	6	0.00350344	0.00759711	0.644688	-0.0113869	0.0183938	1.00351	0.988678	1.01856
eqtl-a-ENSG00000170486	cardiac function	ENSG00000170486 || id:eqtl-a-ENSG00000170486	Inverse variance weighted	5	-0.00906133	0.00888284	0.307684	-0.0264717	0.00834904	0.99098	0.973876	1.00838
eqtl-a-ENSG00000170486	cardiac function	ENSG00000170486 || id:eqtl-a-ENSG00000170486	Inverse variance weighted	5	-0.00906133	0.00888284	0.307684	-0.0264717	0.00834904	0.99098	0.973876	1.00838
eqtl-a-ENSG00000170525	cardiac function	ENSG00000170525 || id:eqtl-a-ENSG00000170525	Inverse variance weighted	4	-0.00404945	0.013657	0.76684	-0.0308172	0.0227183	0.995959	0.969653	1.02298
eqtl-a-ENSG00000170525	cardiac function	ENSG00000170525 || id:eqtl-a-ENSG00000170525	Inverse variance weighted	4	-0.00404945	0.013657	0.76684	-0.0308172	0.0227183	0.995959	0.969653	1.02298
bbj-a-6	cardiac function	Alanine aminotransferase || id:bbj-a-6	Inverse variance weighted	12	-0.0103577	0.0763734	0.892123	-0.160049	0.139334	0.989696	0.852102	1.14951
eqtl-a-ENSG00000170873	cardiac function	ENSG00000170873 || id:eqtl-a-ENSG00000170873	Inverse variance weighted	5	-0.0141298	0.0102259	0.167044	-0.0341726	0.005913	0.98597	0.966405	1.00593
eqtl-a-ENSG00000170873	cardiac function	ENSG00000170873 || id:eqtl-a-ENSG00000170873	Inverse variance weighted	5	-0.0141298	0.0102259	0.167044	-0.0341726	0.005913	0.98597	0.966405	1.00593
eqtl-a-ENSG00000171049	cardiac function	ENSG00000171049 || id:eqtl-a-ENSG00000171049	Inverse variance weighted	4	-0.0149622	0.0154582	0.333086	-0.0452602	0.0153358	0.985149	0.955749	1.01545
eqtl-a-ENSG00000171049	cardiac function	ENSG00000171049 || id:eqtl-a-ENSG00000171049	Inverse variance weighted	4	-0.0149622	0.0154582	0.333086	-0.0452602	0.0153358	0.985149	0.955749	1.01545
eqtl-a-ENSG00000171051	cardiac function	ENSG00000171051 || id:eqtl-a-ENSG00000171051	Inverse variance weighted	4	-0.00750761	0.0125629	0.550105	-0.0321308	0.0171156	0.992521	0.96838	1.01726
eqtl-a-ENSG00000171051	cardiac function	ENSG00000171051 || id:eqtl-a-ENSG00000171051	Inverse variance weighted	4	-0.00750761	0.0125629	0.550105	-0.0321308	0.0171156	0.992521	0.96838	1.01726
bbj-a-60	cardiac function	Estimated glomerular filtration rate || id:bbj-a-60	Inverse variance weighted	27	0.0142774	0.0265935	0.591354	-0.037846	0.0664007	1.01438	0.962861	1.06865
bbj-a-60	cardiac function	Estimated glomerular filtration rate || id:bbj-a-60	Inverse variance weighted	27	0.0142774	0.0265935	0.591354	-0.037846	0.0664007	1.01438	0.962861	1.06865
eqtl-a-ENSG00000171552	cardiac function	ENSG00000171552 || id:eqtl-a-ENSG00000171552	Inverse variance weighted	5	0.036422	0.0193222	0.0594328	-0.00144959	0.0742936	1.03709	0.998551	1.07712
eqtl-a-ENSG00000171552	cardiac function	ENSG00000171552 || id:eqtl-a-ENSG00000171552	Inverse variance weighted	5	0.036422	0.0193222	0.0594328	-0.00144959	0.0742936	1.03709	0.998551	1.07712
eqtl-a-ENSG00000171611	cardiac function	ENSG00000171611 || id:eqtl-a-ENSG00000171611	Inverse variance weighted	5	0.00847394	0.0116291	0.466194	-0.0143191	0.031267	1.00851	0.985783	1.03176
eqtl-a-ENSG00000171611	cardiac function	ENSG00000171611 || id:eqtl-a-ENSG00000171611	Inverse variance weighted	5	0.00847394	0.0116291	0.466194	-0.0143191	0.031267	1.00851	0.985783	1.03176
bbj-a-61	cardiac function	Serum creatinine || id:bbj-a-61	Inverse variance weighted	25	-0.0218498	0.02389	0.360402	-0.0686741	0.0249746	0.978387	0.933631	1.02529
eqtl-a-ENSG00000171840	cardiac function	ENSG00000171840 || id:eqtl-a-ENSG00000171840	Inverse variance weighted	3	-1.34249e-05	0.0327058	0.999672	-0.0641168	0.06409	0.999987	0.937895	1.06619
eqtl-a-ENSG00000171840	cardiac function	ENSG00000171840 || id:eqtl-a-ENSG00000171840	Inverse variance weighted	3	-1.34249e-05	0.0327058	0.999672	-0.0641168	0.06409	0.999987	0.937895	1.06619
eqtl-a-ENSG00000172159	cardiac function	ENSG00000172159 || id:eqtl-a-ENSG00000172159	Inverse variance weighted	10	0.0010466	0.00920036	0.909431	-0.0169861	0.0190793	1.00105	0.983157	1.01926
eqtl-a-ENSG00000172159	cardiac function	ENSG00000172159 || id:eqtl-a-ENSG00000172159	Inverse variance weighted	10	0.0010466	0.00920036	0.909431	-0.0169861	0.0190793	1.00105	0.983157	1.01926
bbj-a-61	cardiac function	Serum creatinine || id:bbj-a-61	Inverse variance weighted	25	-0.0218498	0.02389	0.360402	-0.0686741	0.0249746	0.978387	0.933631	1.02529
eqtl-a-ENSG00000172215	cardiac function	ENSG00000172215 || id:eqtl-a-ENSG00000172215	Inverse variance weighted	4	-0.0112124	0.0116735	0.336804	-0.0340925	0.0116677	0.98885	0.966482	1.01174
eqtl-a-ENSG00000172215	cardiac function	ENSG00000172215 || id:eqtl-a-ENSG00000172215	Inverse variance weighted	4	-0.0112124	0.0116735	0.336804	-0.0340925	0.0116677	0.98885	0.966482	1.01174
eqtl-a-ENSG00000172331	cardiac function	ENSG00000172331 || id:eqtl-a-ENSG00000172331	Inverse variance weighted	4	0.012246	0.0163167	0.452943	-0.0197347	0.0442267	1.01232	0.980459	1.04522
eqtl-a-ENSG00000172331	cardiac function	ENSG00000172331 || id:eqtl-a-ENSG00000172331	Inverse variance weighted	4	0.012246	0.0163167	0.452943	-0.0197347	0.0442267	1.01232	0.980459	1.04522
eqtl-a-ENSG00000172992	cardiac function	ENSG00000172992 || id:eqtl-a-ENSG00000172992	Inverse variance weighted	4	0.000668631	0.00520231	0.897733	-0.00952791	0.0108652	1.00067	0.990517	1.01092
eqtl-a-ENSG00000172992	cardiac function	ENSG00000172992 || id:eqtl-a-ENSG00000172992	Inverse variance weighted	4	0.000668631	0.00520231	0.897733	-0.00952791	0.0108652	1.00067	0.990517	1.01092
eqtl-a-ENSG00000173210	cardiac function	ENSG00000173210 || id:eqtl-a-ENSG00000173210	Inverse variance weighted	9	0.0114877	0.0058247	0.0485815	7.13319e-05	0.0229041	1.01155	1.00007	1.02317
eqtl-a-ENSG00000173210	cardiac function	ENSG00000173210 || id:eqtl-a-ENSG00000173210	Inverse variance weighted	9	0.0114877	0.0058247	0.0485815	7.13319e-05	0.0229041	1.01155	1.00007	1.02317
bbj-a-63	cardiac function	Menopause || id:bbj-a-63	Inverse variance weighted	4	0.00679794	0.00894412	0.447227	-0.0107325	0.0243284	1.00682	0.989325	1.02463
eqtl-a-ENSG00000173369	cardiac function	ENSG00000173369 || id:eqtl-a-ENSG00000173369	Inverse variance weighted	4	-0.00555839	0.0124481	0.655218	-0.0299567	0.0188399	0.994457	0.970488	1.01902
eqtl-a-ENSG00000173369	cardiac function	ENSG00000173369 || id:eqtl-a-ENSG00000173369	Inverse variance weighted	4	-0.00555839	0.0124481	0.655218	-0.0299567	0.0188399	0.994457	0.970488	1.01902
bbj-a-63	cardiac function	Menopause || id:bbj-a-63	Inverse variance weighted	4	0.00679794	0.00894412	0.447227	-0.0107325	0.0243284	1.00682	0.989325	1.02463
eqtl-a-ENSG00000173868	cardiac function	ENSG00000173868 || id:eqtl-a-ENSG00000173868	Inverse variance weighted	5	-0.00368585	0.0114815	0.748191	-0.0261895	0.0188178	0.996321	0.97415	1.019
eqtl-a-ENSG00000173868	cardiac function	ENSG00000173868 || id:eqtl-a-ENSG00000173868	Inverse variance weighted	5	-0.00368585	0.0114815	0.748191	-0.0261895	0.0188178	0.996321	0.97415	1.019
eqtl-a-ENSG00000173917	cardiac function	ENSG00000173917 || id:eqtl-a-ENSG00000173917	Inverse variance weighted	6	-0.00766114	0.00633586	0.226597	-0.0200794	0.00475714	0.992368	0.980121	1.00477
eqtl-a-ENSG00000173917	cardiac function	ENSG00000173917 || id:eqtl-a-ENSG00000173917	Inverse variance weighted	6	-0.00766114	0.00633586	0.226597	-0.0200794	0.00475714	0.992368	0.980121	1.00477
eqtl-a-ENSG00000174123	cardiac function	ENSG00000174123 || id:eqtl-a-ENSG00000174123	Inverse variance weighted	5	0.0133422	0.0302052	0.658692	-0.04586	0.0725445	1.01343	0.955176	1.07524
bbj-a-7	cardiac function	Activated partial thromboplastin time || id:bbj-a-7	Inverse variance weighted	8	-0.00454544	0.0101706	0.654934	-0.0244799	0.015389	0.995465	0.975817	1.01551
eqtl-a-ENSG00000174123	cardiac function	ENSG00000174123 || id:eqtl-a-ENSG00000174123	Inverse variance weighted	5	0.0133422	0.0302052	0.658692	-0.04586	0.0725445	1.01343	0.955176	1.07524
eqtl-a-ENSG00000174175	cardiac function	ENSG00000174175 || id:eqtl-a-ENSG00000174175	Inverse variance weighted	8	0.00947487	0.00626537	0.130468	-0.00280526	0.021755	1.00952	0.997199	1.02199
eqtl-a-ENSG00000174175	cardiac function	ENSG00000174175 || id:eqtl-a-ENSG00000174175	Inverse variance weighted	8	0.00947487	0.00626537	0.130468	-0.00280526	0.021755	1.00952	0.997199	1.02199
ebi-a-GCST90010277	cardiac function	Lysophosphatidic acid phosphatase type 6 levels || id:ebi-a-GCST90010277	Inverse variance weighted	4	0.000553825	0.0036047	0.877894	-0.00651138	0.00761903	1.00055	0.99351	1.00765
eqtl-a-ENSG00000174469	cardiac function	ENSG00000174469 || id:eqtl-a-ENSG00000174469	Inverse variance weighted	5	0.00355946	0.0320521	0.911575	-0.0592626	0.0663815	1.00357	0.942459	1.06863
eqtl-a-ENSG00000174469	cardiac function	ENSG00000174469 || id:eqtl-a-ENSG00000174469	Inverse variance weighted	5	0.00355946	0.0320521	0.911575	-0.0592626	0.0663815	1.00357	0.942459	1.06863
bbj-a-7	cardiac function	Activated partial thromboplastin time || id:bbj-a-7	Inverse variance weighted	8	-0.00454544	0.0101706	0.654934	-0.0244799	0.015389	0.995465	0.975817	1.01551
bbj-a-70	cardiac function	Height || id:bbj-a-70	Inverse variance weighted	201	-8.16176e-05	0.000680796	0.904574	-0.00141598	0.00125274	0.999918	0.998585	1.00125
bbj-a-70	cardiac function	Height || id:bbj-a-70	Inverse variance weighted	201	-8.16176e-05	0.000680796	0.904574	-0.00141598	0.00125274	0.999918	0.998585	1.00125
eqtl-a-ENSG00000175445	cardiac function	ENSG00000175445 || id:eqtl-a-ENSG00000175445	Inverse variance weighted	4	-0.00435955	0.00590515	0.460355	-0.0159336	0.00721454	0.99565	0.984193	1.00724
eqtl-a-ENSG00000175445	cardiac function	ENSG00000175445 || id:eqtl-a-ENSG00000175445	Inverse variance weighted	4	-0.00435955	0.00590515	0.460355	-0.0159336	0.00721454	0.99565	0.984193	1.00724
eqtl-a-ENSG00000175489	cardiac function	ENSG00000175489 || id:eqtl-a-ENSG00000175489	Inverse variance weighted	4	0.0157533	0.0140695	0.26285	-0.0118229	0.0433295	1.01588	0.988247	1.04428
eqtl-a-ENSG00000175489	cardiac function	ENSG00000175489 || id:eqtl-a-ENSG00000175489	Inverse variance weighted	4	0.0157533	0.0140695	0.26285	-0.0118229	0.0433295	1.01588	0.988247	1.04428
eqtl-a-ENSG00000175746	cardiac function	ENSG00000175746 || id:eqtl-a-ENSG00000175746	Inverse variance weighted	7	-0.00763584	0.0060747	0.208757	-0.0195423	0.00427057	0.992393	0.980647	1.00428
eqtl-a-ENSG00000175746	cardiac function	ENSG00000175746 || id:eqtl-a-ENSG00000175746	Inverse variance weighted	7	-0.00763584	0.0060747	0.208757	-0.0195423	0.00427057	0.992393	0.980647	1.00428
bbj-a-71	cardiac function	Atrial Fibrillation || id:bbj-a-71	Inverse variance weighted	10	0.0130506	0.00632463	0.0390697	0.000654295	0.0254469	1.01314	1.00065	1.02577
eqtl-a-ENSG00000176083	cardiac function	ENSG00000176083 || id:eqtl-a-ENSG00000176083	Inverse variance weighted	4	0.0120473	0.00790201	0.127362	-0.00344063	0.0275353	1.01212	0.996565	1.02792
eqtl-a-ENSG00000176083	cardiac function	ENSG00000176083 || id:eqtl-a-ENSG00000176083	Inverse variance weighted	4	0.0120473	0.00790201	0.127362	-0.00344063	0.0275353	1.01212	0.996565	1.02792
bbj-a-71	cardiac function	Atrial Fibrillation || id:bbj-a-71	Inverse variance weighted	10	0.0130506	0.00632463	0.0390697	0.000654295	0.0254469	1.01314	1.00065	1.02577
eqtl-a-ENSG00000176783	cardiac function	ENSG00000176783 || id:eqtl-a-ENSG00000176783	Inverse variance weighted	7	0.00637034	0.00632811	0.314092	-0.00603276	0.0187734	1.00639	0.993985	1.01895
eqtl-a-ENSG00000176783	cardiac function	ENSG00000176783 || id:eqtl-a-ENSG00000176783	Inverse variance weighted	7	0.00637034	0.00632811	0.314092	-0.00603276	0.0187734	1.00639	0.993985	1.01895
bbj-a-72	cardiac function	Rheumatoid Arthritis || id:bbj-a-72	Inverse variance weighted	4	0.0166179	0.00963152	0.084462	-0.00225991	0.0354957	1.01676	0.997743	1.03613
eqtl-a-ENSG00000177119	cardiac function	ENSG00000177119 || id:eqtl-a-ENSG00000177119	Inverse variance weighted	6	0.0199396	0.0095596	0.0369954	0.00120274	0.0386764	1.02014	1.0012	1.03943
eqtl-a-ENSG00000177119	cardiac function	ENSG00000177119 || id:eqtl-a-ENSG00000177119	Inverse variance weighted	6	0.0199396	0.0095596	0.0369954	0.00120274	0.0386764	1.02014	1.0012	1.03943
bbj-a-72	cardiac function	Rheumatoid Arthritis || id:bbj-a-72	Inverse variance weighted	4	0.0166179	0.00963152	0.084462	-0.00225991	0.0354957	1.01676	0.997743	1.03613
eqtl-a-ENSG00000177508	cardiac function	ENSG00000177508 || id:eqtl-a-ENSG00000177508	Inverse variance weighted	5	0.0135147	0.0172946	0.434541	-0.0203826	0.0474121	1.01361	0.979824	1.04855
eqtl-a-ENSG00000177508	cardiac function	ENSG00000177508 || id:eqtl-a-ENSG00000177508	Inverse variance weighted	5	0.0135147	0.0172946	0.434541	-0.0203826	0.0474121	1.01361	0.979824	1.04855
eqtl-a-ENSG00000177697	cardiac function	ENSG00000177697 || id:eqtl-a-ENSG00000177697	Inverse variance weighted	8	0.00911112	0.00752792	0.22616	-0.0056436	0.0238658	1.00915	0.994372	1.02415
eqtl-a-ENSG00000177697	cardiac function	ENSG00000177697 || id:eqtl-a-ENSG00000177697	Inverse variance weighted	8	0.00911112	0.00752792	0.22616	-0.0056436	0.0238658	1.00915	0.994372	1.02415
bbj-a-73	cardiac function	Rheumatoid Arthritis || id:bbj-a-73	Inverse variance weighted	25	0.00814051	0.0059929	0.17435	-0.00360557	0.0198866	1.00817	0.996401	1.02009
bbj-a-73	cardiac function	Rheumatoid Arthritis || id:bbj-a-73	Inverse variance weighted	25	0.00814051	0.0059929	0.17435	-0.00360557	0.0198866	1.00817	0.996401	1.02009
eqtl-a-ENSG00000178695	cardiac function	ENSG00000178695 || id:eqtl-a-ENSG00000178695	Inverse variance weighted	4	-0.00754982	0.00956284	0.429822	-0.026293	0.0111933	0.992479	0.97405	1.01126
eqtl-a-ENSG00000178695	cardiac function	ENSG00000178695 || id:eqtl-a-ENSG00000178695	Inverse variance weighted	4	-0.00754982	0.00956284	0.429822	-0.026293	0.0111933	0.992479	0.97405	1.01126
bbj-a-74	cardiac function	Rheumatoid Arthritis || id:bbj-a-74	Inverse variance weighted	33	0.0115236	0.00766495	0.132731	-0.00349966	0.0265469	1.01159	0.996506	1.0269
eqtl-a-ENSG00000178789	cardiac function	ENSG00000178789 || id:eqtl-a-ENSG00000178789	Inverse variance weighted	5	0.0250309	0.0194445	0.197991	-0.0130804	0.0631421	1.02535	0.987005	1.06518
eqtl-a-ENSG00000178789	cardiac function	ENSG00000178789 || id:eqtl-a-ENSG00000178789	Inverse variance weighted	5	0.0250309	0.0194445	0.197991	-0.0130804	0.0631421	1.02535	0.987005	1.06518
ebi-a-GCST90011866	cardiac function	Systemic lupus erythematosus || id:ebi-a-GCST90011866	Inverse variance weighted	15	0.00648615	0.00492919	0.188219	-0.00317506	0.0161474	1.00651	0.99683	1.01628
ebi-a-GCST90011995	cardiac function	Vascular endothelial growth factor levels || id:ebi-a-GCST90011995	Inverse variance weighted	4	0.00753068	0.00727831	0.300821	-0.00673481	0.0217962	1.00756	0.993288	1.02204
eqtl-a-ENSG00000179163	cardiac function	ENSG00000179163 || id:eqtl-a-ENSG00000179163	Inverse variance weighted	4	-0.012176	0.0081944	0.137307	-0.0282371	0.00388501	0.987898	0.972158	1.00389
eqtl-a-ENSG00000179163	cardiac function	ENSG00000179163 || id:eqtl-a-ENSG00000179163	Inverse variance weighted	4	-0.012176	0.0081944	0.137307	-0.0282371	0.00388501	0.987898	0.972158	1.00389
bbj-a-11	cardiac function	Blood urea nitrogen || id:bbj-a-11	Inverse variance weighted	22	-0.0395711	0.034042	0.245066	-0.106293	0.0271513	0.961202	0.899161	1.02752
bbj-a-74	cardiac function	Rheumatoid Arthritis || id:bbj-a-74	Inverse variance weighted	33	0.0115236	0.00766495	0.132731	-0.00349966	0.0265469	1.01159	0.996506	1.0269
eqtl-a-ENSG00000179348	cardiac function	ENSG00000179348 || id:eqtl-a-ENSG00000179348	Inverse variance weighted	4	0.0083639	0.0190668	0.660906	-0.029007	0.0457348	1.0084	0.97141	1.0468
eqtl-a-ENSG00000179348	cardiac function	ENSG00000179348 || id:eqtl-a-ENSG00000179348	Inverse variance weighted	4	0.0083639	0.0190668	0.660906	-0.029007	0.0457348	1.0084	0.97141	1.0468
ebi-a-GCST90012000	cardiac function	E-selectin levels || id:ebi-a-GCST90012000	Inverse variance weighted	6	-0.0161001	0.00896234	0.0724279	-0.0336663	0.00146607	0.984029	0.966894	1.00147
eqtl-a-ENSG00000179526	cardiac function	ENSG00000179526 || id:eqtl-a-ENSG00000179526	Inverse variance weighted	5	-0.00869392	0.00852059	0.307566	-0.0253943	0.00800643	0.991344	0.974925	1.00804
eqtl-a-ENSG00000179526	cardiac function	ENSG00000179526 || id:eqtl-a-ENSG00000179526	Inverse variance weighted	5	-0.00869392	0.00852059	0.307566	-0.0253943	0.00800643	0.991344	0.974925	1.00804
eqtl-a-ENSG00000179639	cardiac function	ENSG00000179639 || id:eqtl-a-ENSG00000179639	Inverse variance weighted	6	-0.00303051	0.00819721	0.711606	-0.019097	0.013036	0.996974	0.981084	1.01312
eqtl-a-ENSG00000179639	cardiac function	ENSG00000179639 || id:eqtl-a-ENSG00000179639	Inverse variance weighted	6	-0.00303051	0.00819721	0.711606	-0.019097	0.013036	0.996974	0.981084	1.01312
eqtl-a-ENSG00000179715	cardiac function	ENSG00000179715 || id:eqtl-a-ENSG00000179715	Inverse variance weighted	4	-0.00290763	0.00754543	0.699978	-0.0176967	0.0118814	0.997097	0.982459	1.01195
eqtl-a-ENSG00000179715	cardiac function	ENSG00000179715 || id:eqtl-a-ENSG00000179715	Inverse variance weighted	4	-0.00290763	0.00754543	0.699978	-0.0176967	0.0118814	0.997097	0.982459	1.01195
ebi-a-GCST90012007	cardiac function	Monocyte chemoattractant protein-1 levels || id:ebi-a-GCST90012007	Inverse variance weighted	4	-0.0199499	0.018462	0.279877	-0.0561354	0.0162355	0.980248	0.945411	1.01637
eqtl-a-ENSG00000179869	cardiac function	ENSG00000179869 || id:eqtl-a-ENSG00000179869	Inverse variance weighted	4	0.00292876	0.0210179	0.889177	-0.0382664	0.0441239	1.00293	0.962457	1.04511
eqtl-a-ENSG00000179869	cardiac function	ENSG00000179869 || id:eqtl-a-ENSG00000179869	Inverse variance weighted	4	0.00292876	0.0210179	0.889177	-0.0382664	0.0441239	1.00293	0.962457	1.04511
ebi-a-GCST90012011	cardiac function	TNF-related apoptosis-inducing ligand levels || id:ebi-a-GCST90012011	Inverse variance weighted	4	0.0106597	0.0132925	0.422593	-0.0153937	0.036713	1.01072	0.984724	1.0374
eqtl-a-ENSG00000179979	cardiac function	ENSG00000179979 || id:eqtl-a-ENSG00000179979	Inverse variance weighted	4	0.00422637	0.00724158	0.559473	-0.00996712	0.0184199	1.00424	0.990082	1.01859
eqtl-a-ENSG00000179979	cardiac function	ENSG00000179979 || id:eqtl-a-ENSG00000179979	Inverse variance weighted	4	0.00422637	0.00724158	0.559473	-0.00996712	0.0184199	1.00424	0.990082	1.01859
ebi-a-GCST90012014	cardiac function	Tissue factor levels || id:ebi-a-GCST90012014	Inverse variance weighted	6	-0.00100997	0.0148369	0.945729	-0.0300902	0.0280703	0.998991	0.970358	1.02847
ebi-a-GCST90012016	cardiac function	Platelet-derived growth factor subunit B levels || id:ebi-a-GCST90012016	Inverse variance weighted	7	-0.00128692	0.0158463	0.935273	-0.0323457	0.0297718	0.998714	0.968172	1.03022
ebi-a-GCST90012017	cardiac function	Interleukin-27 levels || id:ebi-a-GCST90012017	Inverse variance weighted	4	-0.00876263	0.0260392	0.736481	-0.0597994	0.0422742	0.991276	0.941953	1.04318
eqtl-a-ENSG00000180354	cardiac function	ENSG00000180354 || id:eqtl-a-ENSG00000180354	Inverse variance weighted	8	0.0111324	0.0070906	0.11641	-0.00276516	0.02503	1.01119	0.997239	1.02535
eqtl-a-ENSG00000180354	cardiac function	ENSG00000180354 || id:eqtl-a-ENSG00000180354	Inverse variance weighted	8	0.0111324	0.0070906	0.11641	-0.00276516	0.02503	1.01119	0.997239	1.02535
ebi-a-GCST90012020	cardiac function	Lectin-like oxidized LDL receptor 1 levels || id:ebi-a-GCST90012020	Inverse variance weighted	4	0.0187066	0.0207503	0.367318	-0.0219641	0.0593773	1.01888	0.978275	1.06118
ebi-a-GCST90012022	cardiac function	Fibroblast growth factor 23 levels || id:ebi-a-GCST90012022	Inverse variance weighted	4	-0.0122299	0.0241289	0.612257	-0.0595225	0.0350628	0.987845	0.942214	1.03568
eqtl-a-ENSG00000180611	cardiac function	ENSG00000180611 || id:eqtl-a-ENSG00000180611	Inverse variance weighted	4	0.00337135	0.0153596	0.826265	-0.0267336	0.0334763	1.00338	0.973621	1.03404
ebi-a-GCST90012023	cardiac function	Stem cell factor levels || id:ebi-a-GCST90012023	Inverse variance weighted	11	-0.00204574	0.0133725	0.878414	-0.0282559	0.0241644	0.997956	0.97214	1.02446
eqtl-a-ENSG00000180611	cardiac function	ENSG00000180611 || id:eqtl-a-ENSG00000180611	Inverse variance weighted	4	0.00337135	0.0153596	0.826265	-0.0267336	0.0334763	1.00338	0.973621	1.03404
ebi-a-GCST90012027	cardiac function	Matrix metalloproteinase-3 levels || id:ebi-a-GCST90012027	Inverse variance weighted	5	0.0146197	0.00814222	0.0725665	-0.00133901	0.0305785	1.01473	0.998662	1.03105
bbj-a-76	cardiac function	Colorectal Cancer || id:bbj-a-76	Inverse variance weighted	4	-0.00276316	0.0156295	0.859672	-0.033397	0.0278707	0.997241	0.967155	1.02826
eqtl-a-ENSG00000180914	cardiac function	ENSG00000180914 || id:eqtl-a-ENSG00000180914	Inverse variance weighted	4	0.000723767	0.026054	0.977838	-0.0503421	0.0517896	1.00072	0.950904	1.05315
eqtl-a-ENSG00000180914	cardiac function	ENSG00000180914 || id:eqtl-a-ENSG00000180914	Inverse variance weighted	4	0.000723767	0.026054	0.977838	-0.0503421	0.0517896	1.00072	0.950904	1.05315
ebi-a-GCST90012031	cardiac function	Myeloperoxidase levels || id:ebi-a-GCST90012031	Inverse variance weighted	4	-0.0260677	0.0222486	0.241336	-0.0696749	0.0175396	0.974269	0.932697	1.01769
ebi-a-GCST90012033	cardiac function	Matrix metalloproteinase-1 levels || id:ebi-a-GCST90012033	Inverse variance weighted	4	-0.00833273	0.0130173	0.52209	-0.0338467	0.0171812	0.991702	0.96672	1.01733
ebi-a-GCST90012034	cardiac function	Resistin levels || id:ebi-a-GCST90012034	Inverse variance weighted	7	0.0049367	0.0193225	0.798345	-0.0329354	0.0428088	1.00495	0.967601	1.04374
ebi-a-GCST90012036	cardiac function	Pappalysin-1 levels || id:ebi-a-GCST90012036	Inverse variance weighted	4	0.0174253	0.0216712	0.421353	-0.0250503	0.0599008	1.01758	0.975261	1.06173
eqtl-a-ENSG00000181104	cardiac function	ENSG00000181104 || id:eqtl-a-ENSG00000181104	Inverse variance weighted	4	0.0266588	0.00776884	0.000600233	0.0114319	0.0418857	1.02702	1.0115	1.04278
eqtl-a-ENSG00000181104	cardiac function	ENSG00000181104 || id:eqtl-a-ENSG00000181104	Inverse variance weighted	4	0.0266588	0.00776884	0.000600233	0.0114319	0.0418857	1.02702	1.0115	1.04278
ebi-a-GCST90012039	cardiac function	Chitinase-3-like protein 1 levels || id:ebi-a-GCST90012039	Inverse variance weighted	3	-0.0359556	0.0284709	0.206629	-0.0917585	0.0198474	0.964683	0.912325	1.02005
ebi-a-GCST90012040	cardiac function	ST2 protein levels || id:ebi-a-GCST90012040	Inverse variance weighted	4	-0.000459057	0.0101629	0.963972	-0.0203783	0.0194602	0.999541	0.979828	1.01965
bbj-a-76	cardiac function	Colorectal Cancer || id:bbj-a-76	Inverse variance weighted	4	-0.00276316	0.0156295	0.859672	-0.033397	0.0278707	0.997241	0.967155	1.02826
ebi-a-GCST90012041	cardiac function	Kidney injury molecule 1 levels || id:ebi-a-GCST90012041	Inverse variance weighted	7	-0.00724868	0.0111413	0.515297	-0.0290857	0.0145883	0.992778	0.971333	1.0147
eqtl-a-ENSG00000181788	cardiac function	ENSG00000181788 || id:eqtl-a-ENSG00000181788	Inverse variance weighted	4	-0.00448037	0.0258429	0.862361	-0.0551324	0.0461716	0.99553	0.94636	1.04725
eqtl-a-ENSG00000181788	cardiac function	ENSG00000181788 || id:eqtl-a-ENSG00000181788	Inverse variance weighted	4	-0.00448037	0.0258429	0.862361	-0.0551324	0.0461716	0.99553	0.94636	1.04725
ebi-a-GCST90012051	cardiac function	Urokinase plasminogen activator surface receptor levels || id:ebi-a-GCST90012051	Inverse variance weighted	4	-0.034179	0.0212637	0.107969	-0.0758558	0.00749784	0.966399	0.92695	1.00753
eqtl-a-ENSG00000182048	cardiac function	ENSG00000182048 || id:eqtl-a-ENSG00000182048	Inverse variance weighted	4	0.0162005	0.0107684	0.132466	-0.00490555	0.0373065	1.01633	0.995106	1.03801
eqtl-a-ENSG00000182048	cardiac function	ENSG00000182048 || id:eqtl-a-ENSG00000182048	Inverse variance weighted	4	0.0162005	0.0107684	0.132466	-0.00490555	0.0373065	1.01633	0.995106	1.03801
bbj-a-77	cardiac function	Type 2 Diabetes || id:bbj-a-77	Inverse variance weighted	38	-0.00591656	0.00755332	0.433447	-0.0207211	0.00888794	0.994101	0.979492	1.00893
eqtl-a-ENSG00000182093	cardiac function	ENSG00000182093 || id:eqtl-a-ENSG00000182093	Inverse variance weighted	5	0.000942636	0.00488486	0.846982	-0.00863169	0.010517	1.00094	0.991405	1.01057
eqtl-a-ENSG00000182093	cardiac function	ENSG00000182093 || id:eqtl-a-ENSG00000182093	Inverse variance weighted	5	0.000942636	0.00488486	0.846982	-0.00863169	0.010517	1.00094	0.991405	1.01057
ebi-a-GCST90012053	cardiac function	Cathepsin D levels || id:ebi-a-GCST90012053	Inverse variance weighted	5	0.00343562	0.010397	0.741066	-0.0169426	0.0238138	1.00344	0.9832	1.0241
ebi-a-GCST90012054	cardiac function	Receptor for advanced glycosylation end products levels || id:ebi-a-GCST90012054	Inverse variance weighted	4	0.0228359	0.0305523	0.454801	-0.0370467	0.0827185	1.0231	0.963631	1.08624
ebi-a-GCST90012059	cardiac function	C-X-C motif chemokine 16 levels || id:ebi-a-GCST90012059	Inverse variance weighted	5	0.00317924	0.0203021	0.875563	-0.0366128	0.0429713	1.00318	0.964049	1.04391
ebi-a-GCST90012060	cardiac function	Dickkopf-related protein 1 levels || id:ebi-a-GCST90012060	Inverse variance weighted	6	0.0198436	0.0149934	0.185672	-0.00954341	0.0492305	1.02004	0.990502	1.05046
eqtl-a-ENSG00000182463	cardiac function	ENSG00000182463 || id:eqtl-a-ENSG00000182463	Inverse variance weighted	7	-0.0051534	0.0139828	0.712461	-0.0325597	0.0222529	0.99486	0.967965	1.0225
eqtl-a-ENSG00000182463	cardiac function	ENSG00000182463 || id:eqtl-a-ENSG00000182463	Inverse variance weighted	7	-0.0051534	0.0139828	0.712461	-0.0325597	0.0222529	0.99486	0.967965	1.0225
bbj-a-77	cardiac function	Type 2 Diabetes || id:bbj-a-77	Inverse variance weighted	38	-0.00591656	0.00755332	0.433447	-0.0207211	0.00888794	0.994101	0.979492	1.00893
eqtl-a-ENSG00000182512	cardiac function	ENSG00000182512 || id:eqtl-a-ENSG00000182512	Inverse variance weighted	6	0.0178101	0.0167562	0.28783	-0.0150321	0.0506523	1.01797	0.98508	1.05196
eqtl-a-ENSG00000182512	cardiac function	ENSG00000182512 || id:eqtl-a-ENSG00000182512	Inverse variance weighted	6	0.0178101	0.0167562	0.28783	-0.0150321	0.0506523	1.01797	0.98508	1.05196
eqtl-a-ENSG00000182578	cardiac function	ENSG00000182578 || id:eqtl-a-ENSG00000182578	Inverse variance weighted	5	-0.00414936	0.0141205	0.76887	-0.0318256	0.0235269	0.995859	0.968676	1.02381
eqtl-a-ENSG00000182578	cardiac function	ENSG00000182578 || id:eqtl-a-ENSG00000182578	Inverse variance weighted	5	-0.00414936	0.0141205	0.76887	-0.0318256	0.0235269	0.995859	0.968676	1.02381
ebi-a-GCST90012070	cardiac function	Matrix metalloproteinase-12 levels || id:ebi-a-GCST90012070	Inverse variance weighted	5	0.00807242	0.00784685	0.303599	-0.00730741	0.0234523	1.00811	0.992719	1.02373
eqtl-a-ENSG00000182853	cardiac function	ENSG00000182853 || id:eqtl-a-ENSG00000182853	Inverse variance weighted	4	-0.00364312	0.0119181	0.75985	-0.0270027	0.0197165	0.996364	0.973359	1.01991
eqtl-a-ENSG00000182853	cardiac function	ENSG00000182853 || id:eqtl-a-ENSG00000182853	Inverse variance weighted	4	-0.00364312	0.0119181	0.75985	-0.0270027	0.0197165	0.996364	0.973359	1.01991
ebi-a-GCST90012073	cardiac function	Cathepsin L1 levels || id:ebi-a-GCST90012073	Inverse variance weighted	5	-0.00420957	0.0136492	0.757769	-0.030962	0.0225428	0.995799	0.969512	1.0228
ebi-a-GCST90012080	cardiac function	Follistatin levels || id:ebi-a-GCST90012080	Inverse variance weighted	4	-0.0149522	0.019832	0.450884	-0.053823	0.0239186	0.985159	0.9476	1.02421
ebi-a-GCST90012102	cardiac function	Bioavailable testosterone levels || id:ebi-a-GCST90012102	Inverse variance weighted	61	0.0111369	0.0214869	0.604241	-0.0309774	0.0532511	1.0112	0.969498	1.05469
ebi-a-GCST90012103	cardiac function	Bioavailable testosterone levels || id:ebi-a-GCST90012103	Inverse variance weighted	40	-0.0488669	0.0191877	0.010872	-0.0864747	-0.0112591	0.952308	0.917159	0.988804
eqtl-a-ENSG00000183486	cardiac function	ENSG00000183486 || id:eqtl-a-ENSG00000183486	Inverse variance weighted	5	-0.00925397	0.00748645	0.216423	-0.0239274	0.00541947	0.990789	0.976357	1.00543
eqtl-a-ENSG00000183486	cardiac function	ENSG00000183486 || id:eqtl-a-ENSG00000183486	Inverse variance weighted	5	-0.00925397	0.00748645	0.216423	-0.0239274	0.00541947	0.990789	0.976357	1.00543
ebi-a-GCST90012104	cardiac function	Bioavailable testosterone levels || id:ebi-a-GCST90012104	Inverse variance weighted	47	-0.0283988	0.0277453	0.306047	-0.0827796	0.0259821	0.972001	0.920554	1.02632
eqtl-a-ENSG00000183508	cardiac function	ENSG00000183508 || id:eqtl-a-ENSG00000183508	Inverse variance weighted	5	0.0183137	0.0184478	0.32084	-0.0178439	0.0544714	1.01848	0.982314	1.05598
eqtl-a-ENSG00000183508	cardiac function	ENSG00000183508 || id:eqtl-a-ENSG00000183508	Inverse variance weighted	5	0.0183137	0.0184478	0.32084	-0.0178439	0.0544714	1.01848	0.982314	1.05598
ebi-a-GCST90012105	cardiac function	Estradiol levels || id:ebi-a-GCST90012105	Inverse variance weighted	4	-0.0119666	0.183737	0.948071	-0.372092	0.348159	0.988105	0.689291	1.41646
ebi-a-GCST90012106	cardiac function	Sex hormone-binding globulin levels adjusted for BMI || id:ebi-a-GCST90012106	Inverse variance weighted	130	0.0238598	0.0316676	0.451181	-0.0382086	0.0859283	1.02415	0.962512	1.08973
ebi-a-GCST90012107	cardiac function	Sex hormone-binding globulin levels || id:ebi-a-GCST90012107	Inverse variance weighted	100	0.02988	0.0359411	0.40577	-0.0405645	0.100324	1.03033	0.960247	1.10553
eqtl-a-ENSG00000183621	cardiac function	ENSG00000183621 || id:eqtl-a-ENSG00000183621	Inverse variance weighted	4	-0.0024553	0.0149205	0.869291	-0.0316995	0.0267889	0.997548	0.968798	1.02715
eqtl-a-ENSG00000183621	cardiac function	ENSG00000183621 || id:eqtl-a-ENSG00000183621	Inverse variance weighted	4	-0.0024553	0.0149205	0.869291	-0.0316995	0.0267889	0.997548	0.968798	1.02715
ebi-a-GCST90012108	cardiac function	Sex hormone-binding globulin levels adjusted for BMI || id:ebi-a-GCST90012108	Inverse variance weighted	115	0.0235256	0.0342376	0.492002	-0.0435801	0.0906313	1.0238	0.957356	1.09487
ebi-a-GCST90012109	cardiac function	Sex hormone-binding globulin levels || id:ebi-a-GCST90012109	Inverse variance weighted	104	0.0288122	0.0316262	0.362283	-0.0331751	0.0907994	1.02923	0.967369	1.09505
ebi-a-GCST90012110	cardiac function	Sex hormone-binding globulin levels adjusted for BMI || id:ebi-a-GCST90012110	Inverse variance weighted	185	0.0111536	0.0336449	0.740261	-0.0547904	0.0770975	1.01122	0.946684	1.08015
bbj-a-8	cardiac function	Aspartate aminotransferase || id:bbj-a-8	Inverse variance weighted	8	0.0813266	0.0946819	0.390371	-0.10425	0.266903	1.08473	0.901	1.30591
ebi-a-GCST90012111	cardiac function	Sex hormone-binding globulin levels || id:ebi-a-GCST90012111	Inverse variance weighted	171	0.0241635	0.0344147	0.4826	-0.0432893	0.0916162	1.02446	0.957634	1.09594
ebi-a-GCST90012112	cardiac function	Total testosterone levels || id:ebi-a-GCST90012112	Inverse variance weighted	86	0.00965935	0.0164052	0.555996	-0.0224948	0.0418135	1.00971	0.977756	1.0427
ebi-a-GCST90012113	cardiac function	Total testosterone levels || id:ebi-a-GCST90012113	Inverse variance weighted	76	0.0096922	0.0149849	0.517763	-0.0196782	0.0390626	1.00974	0.980514	1.03984
ebi-a-GCST90012114	cardiac function	Total testosterone levels || id:ebi-a-GCST90012114	Inverse variance weighted	71	0.100654	0.0373508	0.0070425	0.0274464	0.173862	1.10589	1.02783	1.18989
ebi-a-GCST90012115	cardiac function	Age-related hearing impairment (MTAG) || id:ebi-a-GCST90012115	Inverse variance weighted	17	-0.0892701	0.0716898	0.213048	-0.229782	0.0512418	0.914599	0.794707	1.05258
ebi-a-GCST90012790	cardiac function	Percentage of invited food questionnaires completed || id:ebi-a-GCST90012790	Inverse variance weighted	6	0.00449876	0.00259557	0.0830515	-0.000588548	0.00958607	1.00451	0.999412	1.00963
ebi-a-GCST90012792	cardiac function	Acceptance of an invitation to participate in a mental health questionnaire || id:ebi-a-GCST90012792	Inverse variance weighted	16	0.0692596	0.152403	0.649505	-0.22945	0.36797	1.07171	0.79497	1.4448
eqtl-a-ENSG00000184113	cardiac function	ENSG00000184113 || id:eqtl-a-ENSG00000184113	Inverse variance weighted	5	-0.00553546	0.0130679	0.671862	-0.0311485	0.0200776	0.99448	0.969332	1.02028
eqtl-a-ENSG00000184113	cardiac function	ENSG00000184113 || id:eqtl-a-ENSG00000184113	Inverse variance weighted	5	-0.00553546	0.0130679	0.671862	-0.0311485	0.0200776	0.99448	0.969332	1.02028
ebi-a-GCST90012794	cardiac function	Participation in an health questionnaire (not invited vs invited) || id:ebi-a-GCST90012794	Inverse variance weighted	10	0.0483359	0.204535	0.813184	-0.352553	0.449225	1.04952	0.702891	1.5671
bbj-a-11	cardiac function	Blood urea nitrogen || id:bbj-a-11	Inverse variance weighted	22	-0.0395711	0.034042	0.245066	-0.106293	0.0271513	0.961202	0.899161	1.02752
bbj-a-8	cardiac function	Aspartate aminotransferase || id:bbj-a-8	Inverse variance weighted	8	0.0813266	0.0946819	0.390371	-0.10425	0.266903	1.08473	0.901	1.30591
eqtl-a-ENSG00000184232	cardiac function	ENSG00000184232 || id:eqtl-a-ENSG00000184232	Inverse variance weighted	6	0.0147087	0.0107274	0.170332	-0.00631694	0.0357343	1.01482	0.993703	1.03638
eqtl-a-ENSG00000184232	cardiac function	ENSG00000184232 || id:eqtl-a-ENSG00000184232	Inverse variance weighted	6	0.0147087	0.0107274	0.170332	-0.00631694	0.0357343	1.01482	0.993703	1.03638
ebi-a-GCST90012877	cardiac function	Alzheimer's disease or family history of Alzheimer's disease || id:ebi-a-GCST90012877	Inverse variance weighted	21	0.00297664	0.00643432	0.643637	-0.00963462	0.0155879	1.00298	0.990412	1.01571
ebi-a-GCST90012878	cardiac function	Family history of Alzheimer's disease || id:ebi-a-GCST90012878	Inverse variance weighted	6	-0.105706	0.117839	0.369702	-0.336671	0.12526	0.899689	0.714144	1.13344
ebi-a-GCST90013405	cardiac function	Liver enzyme levels (alanine transaminase) || id:ebi-a-GCST90013405	Inverse variance weighted	135	-0.157413	0.0954146	0.0989875	-0.344426	0.0295993	0.854351	0.708627	1.03004
ebi-a-GCST90013410	cardiac function	Basal cell carcinoma || id:ebi-a-GCST90013410	Inverse variance weighted	32	-0.00169306	0.0053679	0.752454	-0.0122141	0.00882803	0.998308	0.98786	1.00887
ebi-a-GCST90013412	cardiac function	COVID-19 (critical illness vs population) || id:ebi-a-GCST90013412	Inverse variance weighted	14	0.000465493	0.000780184	0.550745	-0.00106367	0.00199465	1.00047	0.998937	1.002
eqtl-a-ENSG00000184489	cardiac function	ENSG00000184489 || id:eqtl-a-ENSG00000184489	Inverse variance weighted	4	0.0101244	0.0128574	0.431027	-0.0150761	0.0353249	1.01018	0.985037	1.03596
eqtl-a-ENSG00000184489	cardiac function	ENSG00000184489 || id:eqtl-a-ENSG00000184489	Inverse variance weighted	4	0.0101244	0.0128574	0.431027	-0.0150761	0.0353249	1.01018	0.985037	1.03596
eqtl-a-ENSG00000184500	cardiac function	ENSG00000184500 || id:eqtl-a-ENSG00000184500	Inverse variance weighted	4	0.0162613	0.0082066	0.0475359	0.000176393	0.0323463	1.01639	1.00018	1.03288
eqtl-a-ENSG00000184500	cardiac function	ENSG00000184500 || id:eqtl-a-ENSG00000184500	Inverse variance weighted	4	0.0162613	0.0082066	0.0475359	0.000176393	0.0323463	1.01639	1.00018	1.03288
ebi-a-GCST90013415	cardiac function	COVID-19 (critical illness vs population) || id:ebi-a-GCST90013415	Inverse variance weighted	24	-0.00056356	0.00104973	0.591364	-0.00262104	0.00149392	0.999437	0.997382	1.0015
eqtl-a-ENSG00000184613	cardiac function	ENSG00000184613 || id:eqtl-a-ENSG00000184613	Inverse variance weighted	8	-0.0322999	0.0128845	0.0121804	-0.0575536	-0.00704621	0.968216	0.944071	0.992979
eqtl-a-ENSG00000184613	cardiac function	ENSG00000184613 || id:eqtl-a-ENSG00000184613	Inverse variance weighted	8	-0.0322999	0.0128845	0.0121804	-0.0575536	-0.00704621	0.968216	0.944071	0.992979
bbj-a-86	cardiac function	Arrhythmia || id:bbj-a-86	Inverse variance weighted	8	0.003325	0.0161391	0.836774	-0.0283076	0.0349577	1.00333	0.972089	1.03558
ebi-a-GCST90013422	cardiac function	Ultradistal forearm bone mineral density || id:ebi-a-GCST90013422	Inverse variance weighted	4	-0.0261346	0.0224049	0.243426	-0.0700482	0.0177791	0.974204	0.932349	1.01794
ebi-a-GCST90013429	cardiac function	Amyotrophic lateral sclerosis || id:ebi-a-GCST90013429	Inverse variance weighted	4	-0.00878529	0.0226198	0.697728	-0.0531201	0.0355496	0.991253	0.948266	1.03619
eqtl-a-ENSG00000184702	cardiac function	ENSG00000184702 || id:eqtl-a-ENSG00000184702	Inverse variance weighted	9	0.0114922	0.00626305	0.0665163	-0.000783331	0.0237678	1.01156	0.999217	1.02405
eqtl-a-ENSG00000184702	cardiac function	ENSG00000184702 || id:eqtl-a-ENSG00000184702	Inverse variance weighted	9	0.0114922	0.00626305	0.0665163	-0.000783331	0.0237678	1.01156	0.999217	1.02405
eqtl-a-ENSG00000184792	cardiac function	ENSG00000184792 || id:eqtl-a-ENSG00000184792	Inverse variance weighted	7	0.0190422	0.0202183	0.346281	-0.0205858	0.0586701	1.01922	0.979625	1.06043
eqtl-a-ENSG00000184792	cardiac function	ENSG00000184792 || id:eqtl-a-ENSG00000184792	Inverse variance weighted	7	0.0190422	0.0202183	0.346281	-0.0205858	0.0586701	1.01922	0.979625	1.06043
ebi-a-GCST90013534	cardiac function	Rheumatoid arthritis || id:ebi-a-GCST90013534	Inverse variance weighted	48	0.000121512	0.00589868	0.983565	-0.0114399	0.0116829	1.00012	0.988625	1.01175
ebi-a-GCST90013864	cardiac function	Coronary artery disease (Firth correction) || id:ebi-a-GCST90013864	Inverse variance weighted	22	-0.010622	0.00948974	0.263007	-0.0292219	0.0079779	0.989434	0.971201	1.00801
ebi-a-GCST90013865	cardiac function	Glaucoma (Firth correction) || id:ebi-a-GCST90013865	Inverse variance weighted	11	-0.0029892	0.00825925	0.717411	-0.0191773	0.0131989	0.997015	0.981005	1.01329
bbj-a-86	cardiac function	Arrhythmia || id:bbj-a-86	Inverse variance weighted	8	0.003325	0.0161391	0.836774	-0.0283076	0.0349577	1.00333	0.972089	1.03558
eqtl-a-ENSG00000185052	cardiac function	ENSG00000185052 || id:eqtl-a-ENSG00000185052	Inverse variance weighted	8	0.0152359	0.00515248	0.00310645	0.00513704	0.0253348	1.01535	1.00515	1.02566
eqtl-a-ENSG00000185052	cardiac function	ENSG00000185052 || id:eqtl-a-ENSG00000185052	Inverse variance weighted	8	0.0152359	0.00515248	0.00310645	0.00513704	0.0253348	1.01535	1.00515	1.02566
ebi-a-GCST90013868	cardiac function	Coronary artery disease (SPA correction) || id:ebi-a-GCST90013868	Inverse variance weighted	22	-0.012178	0.00940482	0.195365	-0.0306114	0.00625543	0.987896	0.969852	1.00628
ebi-a-GCST90013869	cardiac function	Glaucoma (SPA correction) || id:ebi-a-GCST90013869	Inverse variance weighted	11	-0.00320775	0.00808329	0.691488	-0.019051	0.0126355	0.996797	0.981129	1.01272
ebi-a-GCST90013870	cardiac function	Body mass index (UKB data field 21001) || id:ebi-a-GCST90013870	Inverse variance weighted	187	-0.0349157	0.0176123	0.0474281	-0.0694359	-0.000395525	0.965687	0.93292	0.999605
ebi-a-GCST90013871	cardiac function	Direct low density lipoprotein levels (UKB data field 30780) || id:ebi-a-GCST90013871	Inverse variance weighted	75	0.0217415	0.0192688	0.259182	-0.0160253	0.0595084	1.02198	0.984102	1.06131
ebi-a-GCST90013872	cardiac function	Total bilirubin levels (UKB data field 30840) || id:ebi-a-GCST90013872	Inverse variance weighted	88	-0.00277829	0.0250293	0.911615	-0.0518357	0.0462791	0.997226	0.949485	1.04737
ebi-a-GCST90013873	cardiac function	Mood swings (UKB data field 1920) (Firth correction) || id:ebi-a-GCST90013873	Inverse variance weighted	22	-0.0290833	0.0279453	0.298005	-0.0838561	0.0256895	0.971336	0.919564	1.02602
eqtl-a-ENSG00000185245	cardiac function	ENSG00000185245 || id:eqtl-a-ENSG00000185245	Inverse variance weighted	5	0.0108864	0.00723568	0.132442	-0.00329555	0.0250683	1.01095	0.99671	1.02539
eqtl-a-ENSG00000185245	cardiac function	ENSG00000185245 || id:eqtl-a-ENSG00000185245	Inverse variance weighted	5	0.0108864	0.00723568	0.132442	-0.00329555	0.0250683	1.01095	0.99671	1.02539
ebi-a-GCST90013874	cardiac function	Miserableness (UKB data field 1930) (Firth correction) || id:ebi-a-GCST90013874	Inverse variance weighted	9	0.0466217	0.0412961	0.258915	-0.0343188	0.127562	1.04773	0.966263	1.13606
ebi-a-GCST90013875	cardiac function	Irritability (UKB data field 1940) (Firth correction) || id:ebi-a-GCST90013875	Inverse variance weighted	18	-0.0490153	0.0303637	0.106468	-0.108528	0.0104975	0.952167	0.897154	1.01055
bbj-a-88	cardiac function	Asthma || id:bbj-a-88	Inverse variance weighted	4	0.0331367	0.0159849	0.0381726	0.00180624	0.0644671	1.03369	1.00181	1.06659
eqtl-a-ENSG00000185420	cardiac function	ENSG00000185420 || id:eqtl-a-ENSG00000185420	Inverse variance weighted	4	-0.0270187	0.0110041	0.0140759	-0.0485868	-0.00545057	0.973343	0.952575	0.994564
eqtl-a-ENSG00000185420	cardiac function	ENSG00000185420 || id:eqtl-a-ENSG00000185420	Inverse variance weighted	4	-0.0270187	0.0110041	0.0140759	-0.0485868	-0.00545057	0.973343	0.952575	0.994564
ebi-a-GCST90013882	cardiac function	High cholesterol (Firth correction) || id:ebi-a-GCST90013882	Inverse variance weighted	26	0.00500138	0.00978509	0.609265	-0.0141774	0.0241802	1.00501	0.985923	1.02447
eqtl-a-ENSG00000185630	cardiac function	ENSG00000185630 || id:eqtl-a-ENSG00000185630	Inverse variance weighted	5	-0.0117523	0.0159768	0.461982	-0.0430668	0.0195621	0.988316	0.957847	1.01975
ebi-a-GCST90013886	cardiac function	Angina (Firth correction) || id:ebi-a-GCST90013886	Inverse variance weighted	15	-0.0132751	0.010388	0.201275	-0.0336356	0.00708538	0.986813	0.966924	1.00711
eqtl-a-ENSG00000185630	cardiac function	ENSG00000185630 || id:eqtl-a-ENSG00000185630	Inverse variance weighted	5	-0.0117523	0.0159768	0.461982	-0.0430668	0.0195621	0.988316	0.957847	1.01975
eqtl-a-ENSG00000185650	cardiac function	ENSG00000185650 || id:eqtl-a-ENSG00000185650	Inverse variance weighted	4	-0.00755075	0.0144278	0.600731	-0.0358292	0.0207277	0.992478	0.964805	1.02094
eqtl-a-ENSG00000185650	cardiac function	ENSG00000185650 || id:eqtl-a-ENSG00000185650	Inverse variance weighted	4	-0.00755075	0.0144278	0.600731	-0.0358292	0.0207277	0.992478	0.964805	1.02094
ebi-a-GCST90013888	cardiac function	Asthma (Firth correction) || id:ebi-a-GCST90013888	Inverse variance weighted	36	0.000634465	0.0115806	0.956308	-0.0220636	0.0233325	1.00063	0.978178	1.02361
ebi-a-GCST90013889	cardiac function	Cholelithiasis gall stones (Firth correction) || id:ebi-a-GCST90013889	Inverse variance weighted	20	-0.00758111	0.0111768	0.497588	-0.0294877	0.0143254	0.992448	0.970943	1.01443
eqtl-a-ENSG00000185745	cardiac function	ENSG00000185745 || id:eqtl-a-ENSG00000185745	Inverse variance weighted	7	-0.0188702	0.00880178	0.0320408	-0.0361216	-0.00161866	0.981307	0.964523	0.998383
eqtl-a-ENSG00000185745	cardiac function	ENSG00000185745 || id:eqtl-a-ENSG00000185745	Inverse variance weighted	7	-0.0188702	0.00880178	0.0320408	-0.0361216	-0.00161866	0.981307	0.964523	0.998383
bbj-a-88	cardiac function	Asthma || id:bbj-a-88	Inverse variance weighted	4	0.0331367	0.0159849	0.0381726	0.00180624	0.0644671	1.03369	1.00181	1.06659
ebi-a-GCST90013892	cardiac function	Type 2 diabetes (Firth correction) || id:ebi-a-GCST90013892	Inverse variance weighted	27	-0.0117538	0.00782816	0.133232	-0.027097	0.00358937	0.988315	0.973267	1.0036
ebi-a-GCST90013893	cardiac function	Hypothyroidism or myxoedema (Firth correction) || id:ebi-a-GCST90013893	Inverse variance weighted	44	-0.00717618	0.0069167	0.299496	-0.0207329	0.00638055	0.99285	0.979481	1.0064
ebi-a-GCST90013902	cardiac function	Atrial fibrillation (Firth correction) || id:ebi-a-GCST90013902	Inverse variance weighted	9	0.00810093	0.00544762	0.136999	-0.0025764	0.0187783	1.00813	0.997427	1.01896
bbj-a-88	cardiac function	Asthma || id:bbj-a-88	Inverse variance weighted	4	0.0331367	0.0159849	0.0381726	0.00180624	0.0644671	1.03369	1.00181	1.06659
ebi-a-GCST90013907	cardiac function	Guilty feelings (UKB data field 2030) (Firth correction) || id:ebi-a-GCST90013907	Inverse variance weighted	8	-0.0337015	0.0414807	0.416527	-0.115004	0.0476007	0.96686	0.891363	1.04875
ebi-a-GCST90013908	cardiac function	Risk taking (UKB data field 2040) (Firth correction) || id:ebi-a-GCST90013908	Inverse variance weighted	10	0.00878469	0.0435955	0.840304	-0.0766624	0.0942318	1.00882	0.926202	1.09881
eqtl-a-ENSG00000186265	cardiac function	ENSG00000186265 || id:eqtl-a-ENSG00000186265	Inverse variance weighted	4	0.0126035	0.0344847	0.714751	-0.0549864	0.0801935	1.01268	0.946498	1.0835
eqtl-a-ENSG00000186265	cardiac function	ENSG00000186265 || id:eqtl-a-ENSG00000186265	Inverse variance weighted	4	0.0126035	0.0344847	0.714751	-0.0549864	0.0801935	1.01268	0.946498	1.0835
ebi-a-GCST90013909	cardiac function	Seen doctor for nerves anxiety tension or depression (UKB data field 2090) (Firth correction) || id:ebi-a-GCST90013909	Inverse variance weighted	6	0.00416638	0.0579271	0.942662	-0.109371	0.117703	1.00418	0.896398	1.12491
ebi-a-GCST90013911	cardiac function	Hearing difficulty problems (UKB data field 2247) (Firth correction) || id:ebi-a-GCST90013911	Inverse variance weighted	16	0.0111197	0.0261331	0.670471	-0.0401012	0.0623406	1.01118	0.960692	1.06432
ebi-a-GCST90013912	cardiac function	Chest pain or discomfort (UKB data field 2335) (Firth correction) || id:ebi-a-GCST90013912	Inverse variance weighted	4	-0.0145018	0.0489345	0.766961	-0.110413	0.0814097	0.985603	0.895464	1.08482
ebi-a-GCST90013913	cardiac function	Fractured bones in last 5 years (UKB data field 2463) (Firth correction) || id:ebi-a-GCST90013913	Inverse variance weighted	7	0.0843238	0.0291146	0.00377621	0.0272592	0.141388	1.08798	1.02763	1.15187
ebi-a-GCST90013914	cardiac function	Reason for glasses/contact lenses: short-sightedness (UKB data field 6147_1) (Firth correction) || id:ebi-a-GCST90013914	Inverse variance weighted	17	0.00650554	0.0176471	0.71239	-0.0280827	0.0410938	1.00653	0.972308	1.04195
bbj-a-9	cardiac function	Albumin || id:bbj-a-9	Inverse variance weighted	5	-0.0273262	0.0479264	0.568563	-0.121262	0.0666097	0.973044	0.885802	1.06888
ebi-a-GCST90013916	cardiac function	High blood pressure (UKB data field 6150) (Firth correction) || id:ebi-a-GCST90013916	Inverse variance weighted	102	-0.0379373	0.0104302	0.000275551	-0.0583804	-0.0174941	0.962773	0.943291	0.982658
ebi-a-GCST90013917	cardiac function	Pain type(s) experienced in last month: Headache (UKB data field 6159_1) (Firth correction) || id:ebi-a-GCST90013917	Inverse variance weighted	14	-0.0258106	0.0214541	0.228954	-0.0678607	0.0162396	0.97452	0.934391	1.01637
ebi-a-GCST90013919	cardiac function	Cholesterol lowering medication use (UKB data field 6177_1) (Firth correction) || id:ebi-a-GCST90013919	Inverse variance weighted	18	0.001119	0.0119384	0.925323	-0.0222803	0.0245183	1.00112	0.977966	1.02482
ebi-a-GCST90013920	cardiac function	Allergic rhinitis (Firth correction) || id:ebi-a-GCST90013920	Inverse variance weighted	49	-0.0050392	0.0132494	0.703697	-0.0310079	0.0209295	0.994973	0.969468	1.02115
eqtl-a-ENSG00000186818	cardiac function	ENSG00000186818 || id:eqtl-a-ENSG00000186818	Inverse variance weighted	4	0.0069784	0.00701656	0.31995	-0.00677406	0.0207309	1.007	0.993249	1.02095
ebi-a-GCST90013921	cardiac function	Any parental history of Alzheimer's disease (Firth correction) || id:ebi-a-GCST90013921	Inverse variance weighted	6	-0.0172713	0.0147656	0.242124	-0.0462119	0.0116694	0.982877	0.95484	1.01174
eqtl-a-ENSG00000186818	cardiac function	ENSG00000186818 || id:eqtl-a-ENSG00000186818	Inverse variance weighted	4	0.0069784	0.00701656	0.31995	-0.00677406	0.0207309	1.007	0.993249	1.02095
ebi-a-GCST90013923	cardiac function	Mood swings (UKB data field 1920) (SPA correction) || id:ebi-a-GCST90013923	Inverse variance weighted	22	-0.0290961	0.0279498	0.29787	-0.0838776	0.0256855	0.971323	0.919544	1.02602
ebi-a-GCST90013924	cardiac function	Miserableness (UKB data field 1930) (SPA correction) || id:ebi-a-GCST90013924	Inverse variance weighted	9	0.0466672	0.0412996	0.25849	-0.0342801	0.127615	1.04777	0.966301	1.13611
eqtl-a-ENSG00000187017	cardiac function	ENSG00000187017 || id:eqtl-a-ENSG00000187017	Inverse variance weighted	5	-0.00739139	0.00823083	0.369179	-0.0235238	0.00874105	0.992636	0.976751	1.00878
eqtl-a-ENSG00000187017	cardiac function	ENSG00000187017 || id:eqtl-a-ENSG00000187017	Inverse variance weighted	5	-0.00739139	0.00823083	0.369179	-0.0235238	0.00874105	0.992636	0.976751	1.00878
bbj-a-9	cardiac function	Albumin || id:bbj-a-9	Inverse variance weighted	5	-0.0273262	0.0479264	0.568563	-0.121262	0.0666097	0.973044	0.885802	1.06888
ebi-a-GCST90013925	cardiac function	Irritability (UKB data field 1940) (SPA correction) || id:ebi-a-GCST90013925	Inverse variance weighted	18	-0.0489827	0.0303587	0.106643	-0.108486	0.0105202	0.952198	0.897192	1.01058
eqtl-a-ENSG00000187231	cardiac function	ENSG00000187231 || id:eqtl-a-ENSG00000187231	Inverse variance weighted	4	0.00810629	0.00844384	0.337043	-0.00844363	0.0246562	1.00814	0.991592	1.02496
eqtl-a-ENSG00000187231	cardiac function	ENSG00000187231 || id:eqtl-a-ENSG00000187231	Inverse variance weighted	4	0.00810629	0.00844384	0.337043	-0.00844363	0.0246562	1.00814	0.991592	1.02496
ebi-a-GCST90013932	cardiac function	High cholesterol (SPA correction) || id:ebi-a-GCST90013932	Inverse variance weighted	26	0.00530086	0.00986111	0.590886	-0.0140269	0.0246286	1.00531	0.986071	1.02493
eqtl-a-ENSG00000187554	cardiac function	ENSG00000187554 || id:eqtl-a-ENSG00000187554	Inverse variance weighted	4	-0.0134839	0.017624	0.444221	-0.0480269	0.0210592	0.986607	0.953108	1.02128
eqtl-a-ENSG00000187554	cardiac function	ENSG00000187554 || id:eqtl-a-ENSG00000187554	Inverse variance weighted	4	-0.0134839	0.017624	0.444221	-0.0480269	0.0210592	0.986607	0.953108	1.02128
ebi-a-GCST90013936	cardiac function	Angina (SPA correction) || id:ebi-a-GCST90013936	Inverse variance weighted	16	-0.0131319	0.0100774	0.192539	-0.0328836	0.0066198	0.986954	0.967651	1.00664
ebi-a-GCST90013938	cardiac function	Asthma (SPA correction) || id:ebi-a-GCST90013938	Inverse variance weighted	37	0.00140006	0.011444	0.902629	-0.0210301	0.0238302	1.0014	0.979189	1.02412
ebi-a-GCST90013939	cardiac function	Cholelithiasis gall stones (SPA correction) || id:ebi-a-GCST90013939	Inverse variance weighted	20	-0.00222533	0.00816827	0.785287	-0.0182351	0.0137845	0.997777	0.98193	1.01388
eqtl-a-ENSG00000187699	cardiac function	ENSG00000187699 || id:eqtl-a-ENSG00000187699	Inverse variance weighted	5	0.0210582	0.019344	0.276323	-0.0168561	0.0589725	1.02128	0.983285	1.06075
eqtl-a-ENSG00000187699	cardiac function	ENSG00000187699 || id:eqtl-a-ENSG00000187699	Inverse variance weighted	5	0.0210582	0.019344	0.276323	-0.0168561	0.0589725	1.02128	0.983285	1.06075
eqtl-a-ENSG00000187800	cardiac function	ENSG00000187800 || id:eqtl-a-ENSG00000187800	Inverse variance weighted	6	-0.000194181	0.0129862	0.98807	-0.0256471	0.0252588	0.999806	0.974679	1.02558
eqtl-a-ENSG00000187800	cardiac function	ENSG00000187800 || id:eqtl-a-ENSG00000187800	Inverse variance weighted	6	-0.000194181	0.0129862	0.98807	-0.0256471	0.0252588	0.999806	0.974679	1.02558
ebi-a-GCST90013942	cardiac function	Type 2 diabetes (SPA correction) || id:ebi-a-GCST90013942	Inverse variance weighted	27	-0.0121332	0.00769057	0.114641	-0.0272067	0.00294033	0.98794	0.97316	1.00294
ebi-a-GCST90013943	cardiac function	Hypothyroidism or myxoedema (SPA correction) || id:ebi-a-GCST90013943	Inverse variance weighted	46	-0.0053	0.00662433	0.423664	-0.0182837	0.00768369	0.994714	0.981882	1.00771
eqtl-a-ENSG00000187990	cardiac function	ENSG00000187990 || id:eqtl-a-ENSG00000187990	Inverse variance weighted	6	-0.0196284	0.0159828	0.219411	-0.0509548	0.0116979	0.980563	0.950322	1.01177
eqtl-a-ENSG00000187990	cardiac function	ENSG00000187990 || id:eqtl-a-ENSG00000187990	Inverse variance weighted	6	-0.0196284	0.0159828	0.219411	-0.0509548	0.0116979	0.980563	0.950322	1.01177
ebi-a-GCST90013952	cardiac function	Atrial fibrillation (SPA correction) || id:ebi-a-GCST90013952	Inverse variance weighted	9	0.00262478	0.00621439	0.672754	-0.00955541	0.014805	1.00263	0.99049	1.01492
ebi-a-GCST90013957	cardiac function	Guilty feelings (UKB data field 2030) (SPA correction) || id:ebi-a-GCST90013957	Inverse variance weighted	8	-0.0338274	0.0414439	0.414373	-0.115057	0.0474026	0.966738	0.891315	1.04854
ebi-a-GCST90013958	cardiac function	Risk taking (UKB data field 2040) (SPA correction) || id:ebi-a-GCST90013958	Inverse variance weighted	10	0.00891191	0.0436141	0.838091	-0.0765717	0.0943956	1.00895	0.926286	1.09899
ebi-a-GCST90013959	cardiac function	Seen doctor for nerves anxiety tension or depression (UKB data field 2090) (SPA correction) || id:ebi-a-GCST90013959	Inverse variance weighted	6	0.00427056	0.0578955	0.941199	-0.109205	0.117746	1.00428	0.896547	1.12496
ebi-a-GCST90013961	cardiac function	Hearing difficulty problems (UKB data field 2247) (SPA correction) || id:ebi-a-GCST90013961	Inverse variance weighted	16	0.0111754	0.026151	0.669131	-0.0400805	0.0624313	1.01124	0.960712	1.06442
ebi-a-GCST90013962	cardiac function	Chest pain or discomfort (UKB data field 2335) (SPA correction) || id:ebi-a-GCST90013962	Inverse variance weighted	4	-0.0143394	0.0488863	0.769277	-0.110157	0.0814778	0.985763	0.895694	1.08489
ebi-a-GCST90013963	cardiac function	Fractured bones in last 5 years (UKB data field 2463) (SPA correction) || id:ebi-a-GCST90013963	Inverse variance weighted	7	0.0841207	0.0289818	0.00370162	0.0273162	0.140925	1.08776	1.02769	1.15134
ebi-a-GCST90013964	cardiac function	Reason for glasses/contact lenses: short-sightedness (UKB data field 6147_1) (SPA correction) || id:ebi-a-GCST90013964	Inverse variance weighted	18	0.00593472	0.0168717	0.725021	-0.0271338	0.0390033	1.00595	0.973231	1.03977
ebi-a-GCST90013966	cardiac function	High blood pressure (UKB data field 6150) (SPA correction) || id:ebi-a-GCST90013966	Inverse variance weighted	103	-0.0366997	0.0104484	0.000443984	-0.0571787	-0.0162208	0.963966	0.944425	0.98391
ebi-a-GCST90013967	cardiac function	Pain type(s) experienced in last month: Headache (UKB data field 6159_1) (SPA correction) || id:ebi-a-GCST90013967	Inverse variance weighted	13	-0.0303796	0.0221504	0.170215	-0.0737943	0.0130352	0.970077	0.928863	1.01312
eqtl-a-ENSG00000188677	cardiac function	ENSG00000188677 || id:eqtl-a-ENSG00000188677	Inverse variance weighted	7	0.00475946	0.00595408	0.424081	-0.00691054	0.0164295	1.00477	0.993113	1.01657
eqtl-a-ENSG00000188677	cardiac function	ENSG00000188677 || id:eqtl-a-ENSG00000188677	Inverse variance weighted	7	0.00475946	0.00595408	0.424081	-0.00691054	0.0164295	1.00477	0.993113	1.01657
ebi-a-GCST90013969	cardiac function	Cholesterol lowering medication use (UKB data field 6177_1) (SPA correction) || id:ebi-a-GCST90013969	Inverse variance weighted	18	0.00117341	0.0119451	0.921746	-0.0222389	0.0245857	1.00117	0.978007	1.02489
ebi-a-GCST90013970	cardiac function	Allergic rhinitis (SPA correction) || id:ebi-a-GCST90013970	Inverse variance weighted	49	-0.00164198	0.0132848	0.901633	-0.0276801	0.0243962	0.998359	0.972699	1.0247
ebi-a-GCST90013971	cardiac function	Any parental history of Alzheimer's disease (SPA correction) || id:ebi-a-GCST90013971	Inverse variance weighted	6	-0.0168068	0.0143693	0.242149	-0.0449708	0.0113571	0.983334	0.956025	1.01142
eqtl-a-ENSG00000188906	cardiac function	ENSG00000188906 || id:eqtl-a-ENSG00000188906	Inverse variance weighted	4	-0.00707935	0.00747319	0.343486	-0.0217268	0.00756809	0.992946	0.978508	1.0076
eqtl-a-ENSG00000188906	cardiac function	ENSG00000188906 || id:eqtl-a-ENSG00000188906	Inverse variance weighted	4	-0.00707935	0.00747319	0.343486	-0.0217268	0.00756809	0.992946	0.978508	1.0076
ebi-a-GCST90013974	cardiac function	Body mass index (UKB data field 21001) || id:ebi-a-GCST90013974	Inverse variance weighted	187	-0.0377872	0.0173854	0.0297427	-0.0718626	-0.0037118	0.962918	0.930659	0.996295
ebi-a-GCST90013975	cardiac function	Body fat percentage (UKB data field 23099) || id:ebi-a-GCST90013975	Inverse variance weighted	180	-0.0329487	0.0232226	0.155951	-0.0784649	0.0125676	0.967588	0.924534	1.01265
ebi-a-GCST90013976	cardiac function	White blood cell leukocyte count (UKB data field 30000) || id:ebi-a-GCST90013976	Inverse variance weighted	162	-0.00440182	0.0153487	0.774275	-0.0344853	0.0256817	0.995608	0.966103	1.02601
ebi-a-GCST90013977	cardiac function	Red blood cell erythrocyte count (UKB data field 30010) || id:ebi-a-GCST90013977	Inverse variance weighted	165	-0.0101068	0.0170595	0.553554	-0.0435434	0.0233299	0.989944	0.957391	1.0236
eqtl-a-ENSG00000189060	cardiac function	ENSG00000189060 || id:eqtl-a-ENSG00000189060	Inverse variance weighted	6	-0.00169821	0.00508101	0.738208	-0.011657	0.00826056	0.998303	0.988411	1.00829
eqtl-a-ENSG00000189060	cardiac function	ENSG00000189060 || id:eqtl-a-ENSG00000189060	Inverse variance weighted	6	-0.00169821	0.00508101	0.738208	-0.011657	0.00826056	0.998303	0.988411	1.00829
ebi-a-GCST90013978	cardiac function	Haemoglobin concentration (UKB data field 30020) || id:ebi-a-GCST90013978	Inverse variance weighted	132	-0.0330998	0.0189222	0.0802459	-0.0701873	0.00398764	0.967442	0.932219	1.004
ebi-a-GCST90013979	cardiac function	Mean corpuscular volume (UKB data field 30040) || id:ebi-a-GCST90013979	Inverse variance weighted	164	0.00736152	0.0124953	0.555767	-0.0171294	0.0318524	1.00739	0.983017	1.03237
ebi-a-GCST90013980	cardiac function	Platelet count (UKB data field 30080) || id:ebi-a-GCST90013980	Inverse variance weighted	211	0.00295337	0.0118598	0.803342	-0.0202918	0.0261985	1.00296	0.979913	1.02654
ebi-a-GCST90013981	cardiac function	Mean platelet thrombocyte volume (UKB data field 30100) || id:ebi-a-GCST90013981	Inverse variance weighted	188	0.00507802	0.0112918	0.652921	-0.017054	0.02721	1.00509	0.983091	1.02758
ebi-a-GCST90013982	cardiac function	Lymphocyte count (UKB data field 30120) || id:ebi-a-GCST90013982	Inverse variance weighted	167	-0.00294494	0.0162621	0.856295	-0.0348187	0.0289288	0.997059	0.965781	1.02935
eqtl-a-ENSG00000189283	cardiac function	ENSG00000189283 || id:eqtl-a-ENSG00000189283	Inverse variance weighted	7	0.0133586	0.0131923	0.311247	-0.0124983	0.0392155	1.01345	0.98758	1.03999
eqtl-a-ENSG00000189283	cardiac function	ENSG00000189283 || id:eqtl-a-ENSG00000189283	Inverse variance weighted	7	0.0133586	0.0131923	0.311247	-0.0124983	0.0392155	1.01345	0.98758	1.03999
eqtl-a-ENSG00000189292	cardiac function	ENSG00000189292 || id:eqtl-a-ENSG00000189292	Inverse variance weighted	4	0.00558895	0.0167396	0.738473	-0.0272206	0.0383985	1.0056	0.973147	1.03915
eqtl-a-ENSG00000189292	cardiac function	ENSG00000189292 || id:eqtl-a-ENSG00000189292	Inverse variance weighted	4	0.00558895	0.0167396	0.738473	-0.0272206	0.0383985	1.0056	0.973147	1.03915
ebi-a-GCST90013983	cardiac function	Monocyte count (UKB data field 30130) || id:ebi-a-GCST90013983	Inverse variance weighted	151	0.00659572	0.0132279	0.618046	-0.019331	0.0325225	1.00662	0.980855	1.03306
ebi-a-GCST90013984	cardiac function	Neutrophill count (UKB data field 30140) || id:ebi-a-GCST90013984	Inverse variance weighted	151	-0.0133207	0.0163454	0.415101	-0.0453577	0.0187163	0.986768	0.955656	1.01889
ebi-a-GCST90013985	cardiac function	Eosinophill count (UKB data field 30150) || id:ebi-a-GCST90013985	Inverse variance weighted	172	0.0063251	0.0116642	0.587636	-0.0165368	0.0291869	1.00635	0.983599	1.02962
ebi-a-GCST90013986	cardiac function	Basophil count || id:ebi-a-GCST90013986	Inverse variance weighted	40	0.0334735	0.0326099	0.304665	-0.030442	0.097389	1.03404	0.970017	1.10229
ebi-a-GCST90013987	cardiac function	Creatinine enzymatic in urine (UKB data field 30510) || id:ebi-a-GCST90013987	Inverse variance weighted	18	-0.116709	0.0575769	0.0426617	-0.22956	-0.00385807	0.889844	0.794884	0.996149
eqtl-a-ENSG00000196139	cardiac function	ENSG00000196139 || id:eqtl-a-ENSG00000196139	Inverse variance weighted	4	0.00337615	0.00833142	0.685308	-0.0129534	0.0197057	1.00338	0.98713	1.0199
eqtl-a-ENSG00000196139	cardiac function	ENSG00000196139 || id:eqtl-a-ENSG00000196139	Inverse variance weighted	4	0.00337615	0.00833142	0.685308	-0.0129534	0.0197057	1.00338	0.98713	1.0199
ebi-a-GCST90013988	cardiac function	Potassium in urine (UKB data field 30520) || id:ebi-a-GCST90013988	Inverse variance weighted	6	0.174456	0.0992061	0.0786594	-0.0199882	0.3689	1.1906	0.98021	1.44614
ebi-a-GCST90013989	cardiac function	Sodium in urine (UKB data field 30530) || id:ebi-a-GCST90013989	Inverse variance weighted	22	-0.0630608	0.0517188	0.22273	-0.16443	0.038308	0.938886	0.848377	1.03905
ebi-a-GCST90013990	cardiac function	Albumin levels (UKB data field 30600) || id:ebi-a-GCST90013990	Inverse variance weighted	91	-0.0437838	0.0225314	0.051988	-0.0879454	0.000377787	0.957161	0.915811	1.00038
eqtl-a-ENSG00000196188	cardiac function	ENSG00000196188 || id:eqtl-a-ENSG00000196188	Inverse variance weighted	3	0.0572554	0.0253261	0.0237761	0.00761626	0.106894	1.05893	1.00765	1.11282
eqtl-a-ENSG00000196188	cardiac function	ENSG00000196188 || id:eqtl-a-ENSG00000196188	Inverse variance weighted	3	0.0572554	0.0253261	0.0237761	0.00761626	0.106894	1.05893	1.00765	1.11282
ebi-a-GCST90013991	cardiac function	Alkaline phosphatase levels (UKB data field 30610) || id:ebi-a-GCST90013991	Inverse variance weighted	149	0.0130916	0.0121404	0.280877	-0.0107036	0.0368869	1.01318	0.989353	1.03758
ebi-a-GCST90013992	cardiac function	Alanine aminotransferase levels (UKB data field 30620) || id:ebi-a-GCST90013992	Inverse variance weighted	109	-0.0220944	0.020074	0.271051	-0.0614394	0.0172507	0.978148	0.94041	1.0174
eqtl-a-ENSG00000196247	cardiac function	ENSG00000196247 || id:eqtl-a-ENSG00000196247	Inverse variance weighted	4	-0.022447	0.0128083	0.0796803	-0.0475512	0.00265715	0.977803	0.953562	1.00266
eqtl-a-ENSG00000196247	cardiac function	ENSG00000196247 || id:eqtl-a-ENSG00000196247	Inverse variance weighted	4	-0.022447	0.0128083	0.0796803	-0.0475512	0.00265715	0.977803	0.953562	1.00266
ebi-a-GCST90013993	cardiac function	Apolipoprotein A levels (UKB data field 30630) || id:ebi-a-GCST90013993	Inverse variance weighted	129	0.0305519	0.0141059	0.0303196	0.00290426	0.0581995	1.03102	1.00291	1.05993
ebi-a-GCST90013994	cardiac function	Apolipoprotein B levels (UKB data field 30640) || id:ebi-a-GCST90013994	Inverse variance weighted	80	0.00710532	0.0148394	0.63207	-0.0219799	0.0361905	1.00713	0.97826	1.03685
ebi-a-GCST90013995	cardiac function	Peak expiratory flow (UKB data field 3064) || id:ebi-a-GCST90013995	Inverse variance weighted	55	0.0213942	0.0381223	0.574662	-0.0533256	0.096114	1.02162	0.948071	1.10088
ebi-a-GCST90013996	cardiac function	Aspartate aminotransferase levels (UKB data field 30650) || id:ebi-a-GCST90013996	Inverse variance weighted	113	-0.00360574	0.0185281	0.845699	-0.0399208	0.0327093	0.996401	0.960866	1.03325
ebi-a-GCST90013997	cardiac function	Direct bilirubin levels (UKB data field 30660) || id:ebi-a-GCST90013997	Inverse variance weighted	57	0.021744	0.025982	0.402655	-0.0291806	0.0726687	1.02198	0.971241	1.07537
ebi-a-GCST90013998	cardiac function	Urea levels (UKB data field 30670) || id:ebi-a-GCST90013998	Inverse variance weighted	87	0.0100314	0.0238182	0.673633	-0.0366523	0.0567152	1.01008	0.964011	1.05835
ebi-a-GCST90013999	cardiac function	Calcium levels (UKB data field 30680) || id:ebi-a-GCST90013999	Inverse variance weighted	101	0.00835961	0.0180543	0.643347	-0.0270269	0.0437461	1.00839	0.973335	1.04472
ebi-a-GCST90014000	cardiac function	Cholesterol levels (UKB data field 30690) || id:ebi-a-GCST90014000	Inverse variance weighted	83	0.0174739	0.0151203	0.24782	-0.0121618	0.0471096	1.01763	0.987912	1.04824
ebi-a-GCST90014001	cardiac function	Creatinine levels (UKB data field 30700) || id:ebi-a-GCST90014001	Inverse variance weighted	188	-0.00745649	0.0170632	0.662116	-0.0409003	0.0259873	0.992571	0.959925	1.02633
ebi-a-GCST90014002	cardiac function	C reactive protein levels (UKB data field 30710) || id:ebi-a-GCST90014002	Inverse variance weighted	103	-0.01707	0.0180137	0.343325	-0.0523769	0.0182368	0.983075	0.948971	1.0184
ebi-a-GCST90014003	cardiac function	Cystatin C levels (UKB data field 30720) || id:ebi-a-GCST90014003	Inverse variance weighted	159	0.00197656	0.0185985	0.915364	-0.0344766	0.0384297	1.00198	0.966111	1.03918
ebi-a-GCST90014004	cardiac function	Gamma glutamyltransferase levels (UKB data field 30730) || id:ebi-a-GCST90014004	Inverse variance weighted	140	-0.0226397	0.0140249	0.106473	-0.0501285	0.00484908	0.977615	0.951107	1.00486
ebi-a-GCST90014005	cardiac function	Glucose levels (UKB data field 30740) || id:ebi-a-GCST90014005	Inverse variance weighted	58	0.00734419	0.015834	0.642773	-0.0236903	0.0383787	1.00737	0.976588	1.03912
ebi-a-GCST90014006	cardiac function	Glycated haemoglobin HbA1c levels (UKB data field 30750) || id:ebi-a-GCST90014006	Inverse variance weighted	162	-0.00690471	0.0131195	0.598684	-0.032619	0.0188095	0.993119	0.967907	1.01899
eqtl-a-ENSG00000196549	cardiac function	ENSG00000196549 || id:eqtl-a-ENSG00000196549	Inverse variance weighted	3	0.00287468	0.0140908	0.838345	-0.0247433	0.0304927	1.00288	0.97556	1.03096
eqtl-a-ENSG00000196549	cardiac function	ENSG00000196549 || id:eqtl-a-ENSG00000196549	Inverse variance weighted	3	0.00287468	0.0140908	0.838345	-0.0247433	0.0304927	1.00288	0.97556	1.03096
ebi-a-GCST90014007	cardiac function	High density lipoprotein cholesterol levels (UKB data field 30760) || id:ebi-a-GCST90014007	Inverse variance weighted	152	0.0535683	0.0134222	6.57875e-05	0.0272608	0.0798758	1.05503	1.02764	1.08315
ebi-a-GCST90014008	cardiac function	IGF 1 (UKB data field 30770) || id:ebi-a-GCST90014008	Inverse variance weighted	167	0.0108295	0.0147498	0.462819	-0.0180801	0.0397392	1.01089	0.982082	1.04054
ebi-a-GCST90014009	cardiac function	Direct low density lipoprotein levels (UKB data field 30780) || id:ebi-a-GCST90014009	Inverse variance weighted	74	0.0252174	0.0205254	0.219225	-0.0150125	0.0654472	1.02554	0.9851	1.06764
eqtl-a-ENSG00000196611	cardiac function	ENSG00000196611 || id:eqtl-a-ENSG00000196611	Inverse variance weighted	4	0.00671168	0.016806	0.689626	-0.0262281	0.0396514	1.00673	0.974113	1.04045
eqtl-a-ENSG00000196611	cardiac function	ENSG00000196611 || id:eqtl-a-ENSG00000196611	Inverse variance weighted	4	0.00671168	0.016806	0.689626	-0.0262281	0.0396514	1.00673	0.974113	1.04045
ebi-a-GCST90014010	cardiac function	Phosphate levels (UKB data field 30810) || id:ebi-a-GCST90014010	Inverse variance weighted	77	-0.0276549	0.0176763	0.117697	-0.0623004	0.00699073	0.972724	0.939601	1.00702
ebi-a-GCST90014011	cardiac function	Sex hormone binding globulin levels (UKB data field 30830) || id:ebi-a-GCST90014011	Inverse variance weighted	124	0.0260407	0.017991	0.147778	-0.00922172	0.0613031	1.02638	0.990821	1.06322
ebi-a-GCST90014012	cardiac function	Total bilirubin levels (UKB data field 30840) || id:ebi-a-GCST90014012	Inverse variance weighted	90	0.00485081	0.023986	0.839733	-0.0421618	0.0518634	1.00486	0.958715	1.05323
ebi-a-GCST90014013	cardiac function	Testosterone levels (UKB data field 30850) || id:ebi-a-GCST90014013	Inverse variance weighted	44	-0.0218417	0.0587275	0.709955	-0.136948	0.0932642	0.978395	0.872016	1.09775
ebi-a-GCST90014014	cardiac function	Triglyceride levels (UKB data field 30870) || id:ebi-a-GCST90014014	Inverse variance weighted	121	-0.0505766	0.0157334	0.00130627	-0.0814141	-0.0197391	0.950681	0.921812	0.980454
ebi-a-GCST90014015	cardiac function	Urate levels (UKB data field 30880) || id:ebi-a-GCST90014015	Inverse variance weighted	126	-0.0242957	0.0178552	0.173606	-0.0592918	0.0107005	0.975997	0.942432	1.01076
eqtl-a-ENSG00000196787	cardiac function	ENSG00000196787 || id:eqtl-a-ENSG00000196787	Inverse variance weighted	5	-0.0241736	0.0159481	0.129579	-0.0554319	0.00708472	0.976116	0.946076	1.00711
ebi-a-GCST90014016	cardiac function	Vitamin D levels (UKB data field 30890) || id:ebi-a-GCST90014016	Inverse variance weighted	40	0.00819752	0.0248257	0.741246	-0.0404608	0.0568558	1.00823	0.960347	1.0585
eqtl-a-ENSG00000196787	cardiac function	ENSG00000196787 || id:eqtl-a-ENSG00000196787	Inverse variance weighted	5	-0.0241736	0.0159481	0.129579	-0.0554319	0.00708472	0.976116	0.946076	1.00711
ebi-a-GCST90014017	cardiac function	Diastolic blood pressure automated reading (UKB data field 4079) || id:ebi-a-GCST90014017	Inverse variance weighted	101	-0.0907627	0.0262338	0.000540641	-0.142181	-0.0393445	0.913234	0.867464	0.961419
ebi-a-GCST90014018	cardiac function	Systolic blood pressure automated reading (UKB data field 4080) || id:ebi-a-GCST90014018	Inverse variance weighted	120	0.022791	0.0274239	0.405938	-0.0309599	0.0765419	1.02305	0.969514	1.07955
ebi-a-GCST90014019	cardiac function	Hand grip strength left (UKB data field 46) || id:ebi-a-GCST90014019	Inverse variance weighted	80	0.0933558	0.0455782	0.0405347	0.00402266	0.182689	1.09785	1.00403	1.20044
ebi-a-GCST90014020	cardiac function	Waist circumference (UKB data field 48) || id:ebi-a-GCST90014020	Inverse variance weighted	133	-0.0413291	0.0236974	0.081153	-0.087776	0.00511781	0.959513	0.915966	1.00513
ebi-a-GCST90014021	cardiac function	Hip circumference (UKB data field 49) || id:ebi-a-GCST90014021	Inverse variance weighted	165	-0.032499	0.0191052	0.0889335	-0.0699453	0.0049473	0.968023	0.932445	1.00496
eqtl-a-ENSG00000196954	cardiac function	ENSG00000196954 || id:eqtl-a-ENSG00000196954	Inverse variance weighted	4	-0.00986284	0.0154762	0.523936	-0.0401962	0.0204705	0.990186	0.960601	1.02068
eqtl-a-ENSG00000196954	cardiac function	ENSG00000196954 || id:eqtl-a-ENSG00000196954	Inverse variance weighted	4	-0.00986284	0.0154762	0.523936	-0.0401962	0.0204705	0.990186	0.960601	1.02068
ebi-a-GCST90014022	cardiac function	Bone mineral density || id:ebi-a-GCST90014022	Inverse variance weighted	221	0.0113337	0.0112516	0.313792	-0.0107195	0.033387	1.0114	0.989338	1.03395
ebi-a-GCST90014023	cardiac function	Type 1 diabetes || id:ebi-a-GCST90014023	Inverse variance weighted	44	-0.0024978	0.00398146	0.530424	-0.0103015	0.00530586	0.997505	0.989751	1.00532
ebi-a-GCST90014033	cardiac function	Haemorrhoidal disease || id:ebi-a-GCST90014033	Inverse variance weighted	54	0.00784071	0.0169668	0.643995	-0.0254143	0.0410957	1.00787	0.974906	1.04195
ebi-a-GCST90014266	cardiac function	Retinal nerve fibre layer (RNFL) thickness || id:ebi-a-GCST90014266	Inverse variance weighted	11	0.00192367	0.00539026	0.721183	-0.00864124	0.0124886	1.00193	0.991396	1.01257
ebi-a-GCST90014267	cardiac function	Ganglion cell inner plexiform layer (GCIPL) thickness || id:ebi-a-GCST90014267	Inverse variance weighted	12	0.00356932	0.00286622	0.213019	-0.00204847	0.00918711	1.00358	0.997954	1.00923
ebi-a-GCST90014289	cardiac function	DNA methylation Hannum age acceleration || id:ebi-a-GCST90014289	Inverse variance weighted	5	0.0015794	0.00875033	0.856763	-0.0155712	0.01873	1.00158	0.984549	1.01891
eqtl-a-ENSG00000197353	cardiac function	ENSG00000197353 || id:eqtl-a-ENSG00000197353	Inverse variance weighted	7	0.00593232	0.00631617	0.347614	-0.00644737	0.018312	1.00595	0.993573	1.01848
eqtl-a-ENSG00000197353	cardiac function	ENSG00000197353 || id:eqtl-a-ENSG00000197353	Inverse variance weighted	7	0.00593232	0.00631617	0.347614	-0.00644737	0.018312	1.00595	0.993573	1.01848
ebi-a-GCST90014290	cardiac function	Intrinsic epigenetic age acceleration || id:ebi-a-GCST90014290	Inverse variance weighted	12	-0.0133224	0.00574339	0.0203619	-0.0245795	-0.00206539	0.986766	0.97572	0.997937
eqtl-a-ENSG00000197415	cardiac function	ENSG00000197415 || id:eqtl-a-ENSG00000197415	Inverse variance weighted	4	0.01745	0.01315	0.184509	-0.00832399	0.0432241	1.0176	0.991711	1.04417
ebi-a-GCST90014292	cardiac function	DNA methylation PhenoAge acceleration || id:ebi-a-GCST90014292	Inverse variance weighted	6	0.000299635	0.00540911	0.955824	-0.0103022	0.0109015	1.0003	0.989751	1.01096
eqtl-a-ENSG00000197415	cardiac function	ENSG00000197415 || id:eqtl-a-ENSG00000197415	Inverse variance weighted	4	0.01745	0.01315	0.184509	-0.00832399	0.0432241	1.0176	0.991711	1.04417
eqtl-a-ENSG00000197459	cardiac function	ENSG00000197459 || id:eqtl-a-ENSG00000197459	Inverse variance weighted	7	-0.0155057	0.0154219	0.314687	-0.0457326	0.0147212	0.984614	0.955297	1.01483
eqtl-a-ENSG00000197459	cardiac function	ENSG00000197459 || id:eqtl-a-ENSG00000197459	Inverse variance weighted	7	-0.0155057	0.0154219	0.314687	-0.0457326	0.0147212	0.984614	0.955297	1.01483
ebi-a-GCST90014294	cardiac function	DNA methylation GrimAge acceleration || id:ebi-a-GCST90014294	Inverse variance weighted	4	0.000120039	0.00374955	0.974461	-0.00722907	0.00746915	1.00012	0.992797	1.0075
ebi-a-GCST90014295	cardiac function	DNA methylation Hannum age acceleration || id:ebi-a-GCST90014295	Inverse variance weighted	4	0.000218242	0.0026288	0.933836	-0.00493421	0.00537069	1.00022	0.995078	1.00539
ebi-a-GCST90014301	cardiac function	DNA methylation Hannum age acceleration || id:ebi-a-GCST90014301	Inverse variance weighted	6	0.00155528	0.00682781	0.819813	-0.0118272	0.0149378	1.00156	0.988242	1.01505
ebi-a-GCST90014302	cardiac function	Intrinsic epigenetic age acceleration || id:ebi-a-GCST90014302	Inverse variance weighted	14	-0.010518	0.00515962	0.0414986	-0.0206308	-0.000405098	0.989537	0.979581	0.999595
ebi-a-GCST90014304	cardiac function	DNA methylation PhenoAge acceleration || id:ebi-a-GCST90014304	Inverse variance weighted	5	-0.00697546	0.00562975	0.215332	-0.0180098	0.00405884	0.993049	0.982151	1.00407
eqtl-a-ENSG00000197747	cardiac function	ENSG00000197747 || id:eqtl-a-ENSG00000197747	Inverse variance weighted	4	-0.0100074	0.0111431	0.36914	-0.0318479	0.011833	0.990042	0.968654	1.0119
eqtl-a-ENSG00000197747	cardiac function	ENSG00000197747 || id:eqtl-a-ENSG00000197747	Inverse variance weighted	4	-0.0100074	0.0111431	0.36914	-0.0318479	0.011833	0.990042	0.968654	1.0119
ebi-a-GCST90014325	cardiac function	Asthma || id:ebi-a-GCST90014325	Inverse variance weighted	38	-0.00619768	0.011984	0.605042	-0.0296863	0.0172909	0.993821	0.97075	1.01744
eqtl-a-ENSG00000197903	cardiac function	ENSG00000197903 || id:eqtl-a-ENSG00000197903	Inverse variance weighted	6	0.0312072	0.0146324	0.0329452	0.00252774	0.0598866	1.0317	1.00253	1.06172
eqtl-a-ENSG00000197903	cardiac function	ENSG00000197903 || id:eqtl-a-ENSG00000197903	Inverse variance weighted	6	0.0312072	0.0146324	0.0329452	0.00252774	0.0598866	1.0317	1.00253	1.06172
eqtl-a-ENSG00000197959	cardiac function	ENSG00000197959 || id:eqtl-a-ENSG00000197959	Inverse variance weighted	6	0.00806842	0.0114554	0.481224	-0.0143841	0.030521	1.0081	0.985719	1.03099
eqtl-a-ENSG00000197959	cardiac function	ENSG00000197959 || id:eqtl-a-ENSG00000197959	Inverse variance weighted	6	0.00806842	0.0114554	0.481224	-0.0143841	0.030521	1.0081	0.985719	1.03099
ebi-a-GCST90016604	cardiac function	Bipolar disorder vs ADHD (ordinary least squares (OLS)) || id:ebi-a-GCST90016604	Inverse variance weighted	8	0.135634	0.0658852	0.0395286	0.006499	0.264769	1.14526	1.00652	1.30313
bbj-a-1	cardiac function	Body mass index || id:bbj-a-1	Inverse variance weighted	41	-0.0181915	0.0225671	0.420181	-0.062423	0.02604	0.981973	0.939485	1.02638
ebi-a-GCST90016605	cardiac function	Bipolar disorder vs anorexia nervosa (ordinary least squares (OLS)) || id:ebi-a-GCST90016605	Inverse variance weighted	4	-0.0768006	0.163706	0.638971	-0.397664	0.244062	0.926074	0.671888	1.27642
ebi-a-GCST90016607	cardiac function	Bipolar disorder vs major depressive disorder (ordinary least squares (OLS)) || id:ebi-a-GCST90016607	Inverse variance weighted	5	0.114965	0.198811	0.563087	-0.274704	0.504634	1.12183	0.759797	1.65638
ebi-a-GCST90016609	cardiac function	Bipolar disorder vs Tourette's syndrome and other tic disorders (ordinary least squares (OLS)) || id:ebi-a-GCST90016609	Inverse variance weighted	5	-0.0110179	0.123802	0.929085	-0.253669	0.231633	0.989043	0.775949	1.26066
eqtl-a-ENSG00000198121	cardiac function	ENSG00000198121 || id:eqtl-a-ENSG00000198121	Inverse variance weighted	4	0.00509738	0.00622735	0.413045	-0.00710823	0.017303	1.00511	0.992917	1.01745
ebi-a-GCST90016610	cardiac function	Crohn's disease vs rheumatoid arthritis (ordinary least squares (OLS)) || id:ebi-a-GCST90016610	Inverse variance weighted	23	-0.00179044	0.0161202	0.911563	-0.0333861	0.0298052	0.998211	0.967165	1.03025
eqtl-a-ENSG00000198121	cardiac function	ENSG00000198121 || id:eqtl-a-ENSG00000198121	Inverse variance weighted	4	0.00509738	0.00622735	0.413045	-0.00710823	0.017303	1.00511	0.992917	1.01745
eqtl-a-ENSG00000198142	cardiac function	ENSG00000198142 || id:eqtl-a-ENSG00000198142	Inverse variance weighted	6	-0.00381104	0.0105212	0.717184	-0.0244326	0.0168105	0.996196	0.975863	1.01695
eqtl-a-ENSG00000198142	cardiac function	ENSG00000198142 || id:eqtl-a-ENSG00000198142	Inverse variance weighted	6	-0.00381104	0.0105212	0.717184	-0.0244326	0.0168105	0.996196	0.975863	1.01695
ebi-a-GCST90016611	cardiac function	Crohn's disease vs ulcerative colitis (ordinary least squares (OLS)) || id:ebi-a-GCST90016611	Inverse variance weighted	10	-0.0175876	0.0309566	0.569941	-0.0782625	0.0430872	0.982566	0.924722	1.04403
ebi-a-GCST90016612	cardiac function	Major depressive disorder vs ADHD (ordinary least squares (OLS)) || id:ebi-a-GCST90016612	Inverse variance weighted	4	0.00801234	0.163639	0.960948	-0.31272	0.328745	1.00804	0.731455	1.38922
eqtl-a-ENSG00000198178	cardiac function	ENSG00000198178 || id:eqtl-a-ENSG00000198178	Inverse variance weighted	4	-0.0137563	0.0232801	0.554587	-0.0593853	0.0318728	0.986338	0.942344	1.03239
eqtl-a-ENSG00000198178	cardiac function	ENSG00000198178 || id:eqtl-a-ENSG00000198178	Inverse variance weighted	4	-0.0137563	0.0232801	0.554587	-0.0593853	0.0318728	0.986338	0.942344	1.03239
eqtl-a-ENSG00000198189	cardiac function	ENSG00000198189 || id:eqtl-a-ENSG00000198189	Inverse variance weighted	4	-0.00350509	0.00535192	0.512518	-0.0139949	0.00698467	0.996501	0.986103	1.00701
eqtl-a-ENSG00000198189	cardiac function	ENSG00000198189 || id:eqtl-a-ENSG00000198189	Inverse variance weighted	4	-0.00350509	0.00535192	0.512518	-0.0139949	0.00698467	0.996501	0.986103	1.00701
ebi-a-GCST90016618	cardiac function	Schizophrenia vs ADHD (ordinary least squares (OLS)) || id:ebi-a-GCST90016618	Inverse variance weighted	27	-0.0123444	0.0337775	0.714767	-0.0785482	0.0538595	0.987732	0.924457	1.05534
ebi-a-GCST90016619	cardiac function	Schizophrenia vs anorexia nervosa (ordinary least squares (OLS)) || id:ebi-a-GCST90016619	Inverse variance weighted	20	-0.00844348	0.0417449	0.83971	-0.0902635	0.0733765	0.991592	0.91369	1.07614
eqtl-a-ENSG00000198336	cardiac function	ENSG00000198336 || id:eqtl-a-ENSG00000198336	Inverse variance weighted	5	-0.0171799	0.0191173	0.368835	-0.0546498	0.02029	0.982967	0.946817	1.0205
eqtl-a-ENSG00000198336	cardiac function	ENSG00000198336 || id:eqtl-a-ENSG00000198336	Inverse variance weighted	5	-0.0171799	0.0191173	0.368835	-0.0546498	0.02029	0.982967	0.946817	1.0205
ebi-a-GCST90016620	cardiac function	Schizophrenia vs autism spectrum disorder (ordinary least squares (OLS)) || id:ebi-a-GCST90016620	Inverse variance weighted	19	0.00408534	0.0635742	0.948762	-0.12052	0.128691	1.00409	0.886459	1.13734
ebi-a-GCST90016621	cardiac function	Schizophrenia vs bipolar disorder (ordinary least squares (OLS)) || id:ebi-a-GCST90016621	Inverse variance weighted	4	-0.0890304	0.289003	0.758037	-0.655477	0.477416	0.914818	0.519194	1.6119
ebi-a-GCST90016622	cardiac function	Schizophrenia vs major depressive disorder (ordinary least squares (OLS)) || id:ebi-a-GCST90016622	Inverse variance weighted	50	-0.0102376	0.0330633	0.756837	-0.0750417	0.0545665	0.989815	0.927705	1.05608
ebi-a-GCST90016623	cardiac function	Schizophrenia vs obsessive compulsive disorder (ordinary least squares (OLS)) || id:ebi-a-GCST90016623	Inverse variance weighted	6	0.0461012	0.104817	0.660062	-0.159339	0.251542	1.04718	0.852707	1.28601
ebi-a-GCST90016624	cardiac function	Schizophrenia vs Tourette's syndrome and other tic disorders (ordinary least squares (OLS)) || id:ebi-a-GCST90016624	Inverse variance weighted	21	0.0151417	0.0364966	0.67823	-0.0563917	0.0866751	1.01526	0.945169	1.09054
eqtl-a-ENSG00000198478	cardiac function	ENSG00000198478 || id:eqtl-a-ENSG00000198478	Inverse variance weighted	13	0.00771634	0.00510738	0.130833	-0.00229411	0.0177268	1.00775	0.997709	1.01788
eqtl-a-ENSG00000198478	cardiac function	ENSG00000198478 || id:eqtl-a-ENSG00000198478	Inverse variance weighted	13	0.00771634	0.00510738	0.130833	-0.00229411	0.0177268	1.00775	0.997709	1.01788
ebi-a-GCST90016625	cardiac function	Ulcerative colitis vs rheumatoid arthritis (ordinary least squares (OLS)) || id:ebi-a-GCST90016625	Inverse variance weighted	18	0.00705865	0.0209372	0.736016	-0.0339783	0.0480956	1.00708	0.966592	1.04927
ebi-a-GCST90016666	cardiac function	Liver volume || id:ebi-a-GCST90016666	Inverse variance weighted	7	-0.0363591	0.0363627	0.317358	-0.10763	0.0349117	0.964294	0.89796	1.03553
ebi-a-GCST000568	cardiac function	Fasting blood glucose || id:ebi-a-GCST000568	Inverse variance weighted	13	0.0255389	0.0253821	0.31433	-0.02421	0.0752877	1.02587	0.976081	1.07819
ebi-a-GCST90016667	cardiac function	Spleen volume || id:ebi-a-GCST90016667	Inverse variance weighted	18	0.000849568	0.0170156	0.960179	-0.0325009	0.0342001	1.00085	0.968022	1.03479
ebi-a-GCST90016668	cardiac function	Lung volume || id:ebi-a-GCST90016668	Inverse variance weighted	6	-0.0358352	0.0343632	0.297025	-0.103187	0.0315168	0.964799	0.901958	1.03202
eqtl-a-ENSG00000198574	cardiac function	ENSG00000198574 || id:eqtl-a-ENSG00000198574	Inverse variance weighted	5	0.00142299	0.0130659	0.913275	-0.0241861	0.0270321	1.00142	0.976104	1.0274
eqtl-a-ENSG00000198574	cardiac function	ENSG00000198574 || id:eqtl-a-ENSG00000198574	Inverse variance weighted	5	0.00142299	0.0130659	0.913275	-0.0241861	0.0270321	1.00142	0.976104	1.0274
ebi-a-GCST90016669	cardiac function	Pancreas volume || id:ebi-a-GCST90016669	Inverse variance weighted	6	-0.0587458	0.0282303	0.0374387	-0.114077	-0.00341438	0.942946	0.892189	0.996591
ebi-a-GCST90016670	cardiac function	Kidney volume || id:ebi-a-GCST90016670	Inverse variance weighted	6	-0.0373195	0.0603678	0.536442	-0.15564	0.0810014	0.963368	0.855867	1.08437
ebi-a-GCST90016673	cardiac function	Percent liver fat || id:ebi-a-GCST90016673	Inverse variance weighted	4	0.00656738	0.0123762	0.595664	-0.0176899	0.0308247	1.00659	0.982466	1.0313
ebi-a-GCST000568	cardiac function	Fasting blood glucose || id:ebi-a-GCST000568	Inverse variance weighted	13	0.0255389	0.0253821	0.31433	-0.02421	0.0752877	1.02587	0.976081	1.07819
eqtl-a-ENSG00000198846	cardiac function	ENSG00000198846 || id:eqtl-a-ENSG00000198846	Inverse variance weighted	4	0.0146215	0.01491	0.326764	-0.0146021	0.0438452	1.01473	0.985504	1.04482
eqtl-a-ENSG00000198846	cardiac function	ENSG00000198846 || id:eqtl-a-ENSG00000198846	Inverse variance weighted	4	0.0146215	0.01491	0.326764	-0.0146021	0.0438452	1.01473	0.985504	1.04482
eqtl-a-ENSG00000198876	cardiac function	ENSG00000198876 || id:eqtl-a-ENSG00000198876	Inverse variance weighted	6	-0.0206567	0.0211848	0.329525	-0.0621789	0.0208655	0.979555	0.939715	1.02108
eqtl-a-ENSG00000198876	cardiac function	ENSG00000198876 || id:eqtl-a-ENSG00000198876	Inverse variance weighted	6	-0.0206567	0.0211848	0.329525	-0.0621789	0.0208655	0.979555	0.939715	1.02108
eqtl-a-ENSG00000198892	cardiac function	ENSG00000198892 || id:eqtl-a-ENSG00000198892	Inverse variance weighted	4	-0.00528884	0.0161966	0.744016	-0.0370342	0.0264565	0.994725	0.963643	1.02681
eqtl-a-ENSG00000198892	cardiac function	ENSG00000198892 || id:eqtl-a-ENSG00000198892	Inverse variance weighted	4	-0.00528884	0.0161966	0.744016	-0.0370342	0.0264565	0.994725	0.963643	1.02681
eqtl-a-ENSG00000198937	cardiac function	ENSG00000198937 || id:eqtl-a-ENSG00000198937	Inverse variance weighted	4	-0.00927316	0.0077397	0.230867	-0.024443	0.00589666	0.99077	0.975853	1.00591
eqtl-a-ENSG00000198937	cardiac function	ENSG00000198937 || id:eqtl-a-ENSG00000198937	Inverse variance weighted	4	-0.00927316	0.0077397	0.230867	-0.024443	0.00589666	0.99077	0.975853	1.00591
eqtl-a-ENSG00000198948	cardiac function	ENSG00000198948 || id:eqtl-a-ENSG00000198948	Inverse variance weighted	3	0.0336631	0.0140639	0.0166845	0.00609792	0.0612284	1.03424	1.00612	1.06314
eqtl-a-ENSG00000198948	cardiac function	ENSG00000198948 || id:eqtl-a-ENSG00000198948	Inverse variance weighted	3	0.0336631	0.0140639	0.0166845	0.00609792	0.0612284	1.03424	1.00612	1.06314
eqtl-a-ENSG00000198959	cardiac function	ENSG00000198959 || id:eqtl-a-ENSG00000198959	Inverse variance weighted	4	0.00598801	0.0261583	0.818935	-0.0452822	0.0572582	1.00601	0.955728	1.05893
eqtl-a-ENSG00000198959	cardiac function	ENSG00000198959 || id:eqtl-a-ENSG00000198959	Inverse variance weighted	4	0.00598801	0.0261583	0.818935	-0.0452822	0.0572582	1.00601	0.955728	1.05893
eqtl-a-ENSG00000203813	cardiac function	ENSG00000203813 || id:eqtl-a-ENSG00000203813	Inverse variance weighted	12	-0.00492951	0.0109717	0.65322	-0.026434	0.016575	0.995083	0.973912	1.01671
eqtl-a-ENSG00000203813	cardiac function	ENSG00000203813 || id:eqtl-a-ENSG00000203813	Inverse variance weighted	12	-0.00492951	0.0109717	0.65322	-0.026434	0.016575	0.995083	0.973912	1.01671
ebi-a-GCST000612	cardiac function	Celiac disease || id:ebi-a-GCST000612	Inverse variance weighted	8	0.00308161	0.00627603	0.623418	-0.00921941	0.0153826	1.00309	0.990823	1.0155
eqtl-a-ENSG00000204103	cardiac function	ENSG00000204103 || id:eqtl-a-ENSG00000204103	Inverse variance weighted	4	0.00808073	0.0126806	0.52396	-0.0167732	0.0329346	1.00811	0.983367	1.03348
eqtl-a-ENSG00000204103	cardiac function	ENSG00000204103 || id:eqtl-a-ENSG00000204103	Inverse variance weighted	4	0.00808073	0.0126806	0.52396	-0.0167732	0.0329346	1.00811	0.983367	1.03348
ebi-a-GCST90018564	cardiac function	Atopic dermatitis || id:ebi-a-GCST90018564	Inverse variance weighted	8	0.00045996	0.00881321	0.958377	-0.0168139	0.0177338	1.00046	0.983327	1.01789
ebi-a-GCST90018573	cardiac function	Angina pectoris || id:ebi-a-GCST90018573	Inverse variance weighted	8	-0.0135846	0.0135705	0.316807	-0.0401827	0.0130135	0.986507	0.960614	1.0131
ebi-a-GCST90018575	cardiac function	Asthma || id:ebi-a-GCST90018575	Inverse variance weighted	12	-0.0110487	0.0128377	0.389434	-0.0362105	0.0141132	0.989012	0.964437	1.01421
ebi-a-GCST000612	cardiac function	Celiac disease || id:ebi-a-GCST000612	Inverse variance weighted	8	0.00308161	0.00627603	0.623418	-0.00921941	0.0153826	1.00309	0.990823	1.0155
ebi-a-GCST90018579	cardiac function	Breast cancer || id:ebi-a-GCST90018579	Inverse variance weighted	6	-0.0051575	0.00910896	0.571258	-0.0230111	0.0126961	0.994856	0.977252	1.01278
eqtl-a-ENSG00000204323	cardiac function	ENSG00000204323 || id:eqtl-a-ENSG00000204323	Inverse variance weighted	4	0.00408809	0.0236825	0.862949	-0.0423295	0.0505057	1.0041	0.958554	1.0518
eqtl-a-ENSG00000204323	cardiac function	ENSG00000204323 || id:eqtl-a-ENSG00000204323	Inverse variance weighted	4	0.00408809	0.0236825	0.862949	-0.0423295	0.0505057	1.0041	0.958554	1.0518
eqtl-a-ENSG00000204420	cardiac function	ENSG00000204420 || id:eqtl-a-ENSG00000204420	Inverse variance weighted	7	0.0138263	0.00780395	0.0764426	-0.0014694	0.0291221	1.01392	0.998532	1.02955
eqtl-a-ENSG00000204420	cardiac function	ENSG00000204420 || id:eqtl-a-ENSG00000204420	Inverse variance weighted	7	0.0138263	0.00780395	0.0764426	-0.0014694	0.0291221	1.01392	0.998532	1.02955
ebi-a-GCST90018588	cardiac function	Colorectal cancer || id:ebi-a-GCST90018588	Inverse variance weighted	7	0.0108611	0.0139649	0.436719	-0.01651	0.0382323	1.01092	0.983626	1.03897
eqtl-a-ENSG00000204463	cardiac function	ENSG00000204463 || id:eqtl-a-ENSG00000204463	Inverse variance weighted	5	-0.0212933	0.0162474	0.190005	-0.0531382	0.0105516	0.978932	0.948249	1.01061
eqtl-a-ENSG00000204463	cardiac function	ENSG00000204463 || id:eqtl-a-ENSG00000204463	Inverse variance weighted	5	-0.0212933	0.0162474	0.190005	-0.0531382	0.0105516	0.978932	0.948249	1.01061
eqtl-a-ENSG00000204514	cardiac function	ENSG00000204514 || id:eqtl-a-ENSG00000204514	Inverse variance weighted	4	-0.00232936	0.00866312	0.78802	-0.0193091	0.0146503	0.997673	0.980876	1.01476
eqtl-a-ENSG00000204514	cardiac function	ENSG00000204514 || id:eqtl-a-ENSG00000204514	Inverse variance weighted	4	-0.00232936	0.00866312	0.78802	-0.0193091	0.0146503	0.997673	0.980876	1.01476
ebi-a-GCST90018599	cardiac function	Cholelithiasis || id:ebi-a-GCST90018599	Inverse variance weighted	7	0.0179747	0.0199497	0.367587	-0.0211267	0.0570762	1.01814	0.979095	1.05874
ebi-a-GCST000679	cardiac function	Rheumatoid arthritis || id:ebi-a-GCST000679	Inverse variance weighted	4	-0.0058555	0.010639	0.582059	-0.026708	0.014997	0.994162	0.973646	1.01511
eqtl-a-ENSG00000204634	cardiac function	ENSG00000204634 || id:eqtl-a-ENSG00000204634	Inverse variance weighted	4	-0.00429846	0.00851227	0.613579	-0.0209825	0.0123856	0.995711	0.979236	1.01246
eqtl-a-ENSG00000204634	cardiac function	ENSG00000204634 || id:eqtl-a-ENSG00000204634	Inverse variance weighted	4	-0.00429846	0.00851227	0.613579	-0.0209825	0.0123856	0.995711	0.979236	1.01246
ebi-a-GCST90018627	cardiac function	Graves' disease || id:ebi-a-GCST90018627	Inverse variance weighted	6	0.00446955	0.0126126	0.723061	-0.0202512	0.0291903	1.00448	0.979952	1.02962
eqtl-a-ENSG00000204710	cardiac function	ENSG00000204710 || id:eqtl-a-ENSG00000204710	Inverse variance weighted	6	0.00256374	0.00585302	0.661372	-0.00890819	0.0140357	1.00257	0.991131	1.01413
eqtl-a-ENSG00000204710	cardiac function	ENSG00000204710 || id:eqtl-a-ENSG00000204710	Inverse variance weighted	6	0.00256374	0.00585302	0.661372	-0.00890819	0.0140357	1.00257	0.991131	1.01413
eqtl-a-ENSG00000204815	cardiac function	ENSG00000204815 || id:eqtl-a-ENSG00000204815	Inverse variance weighted	5	0.0184944	0.0110519	0.0942444	-0.00316723	0.0401561	1.01867	0.996838	1.04097
eqtl-a-ENSG00000204815	cardiac function	ENSG00000204815 || id:eqtl-a-ENSG00000204815	Inverse variance weighted	5	0.0184944	0.0110519	0.0942444	-0.00316723	0.0401561	1.01867	0.996838	1.04097
ebi-a-GCST000679	cardiac function	Rheumatoid arthritis || id:ebi-a-GCST000679	Inverse variance weighted	4	-0.0058555	0.010639	0.582059	-0.026708	0.014997	0.994162	0.973646	1.01511
eqtl-a-ENSG00000205038	cardiac function	ENSG00000205038 || id:eqtl-a-ENSG00000205038	Inverse variance weighted	4	0.0215365	0.0116954	0.0655556	-0.00138649	0.0444595	1.02177	0.998614	1.04546
eqtl-a-ENSG00000205038	cardiac function	ENSG00000205038 || id:eqtl-a-ENSG00000205038	Inverse variance weighted	4	0.0215365	0.0116954	0.0655556	-0.00138649	0.0444595	1.02177	0.998614	1.04546
eqtl-a-ENSG00000205309	cardiac function	ENSG00000205309 || id:eqtl-a-ENSG00000205309	Inverse variance weighted	5	0.0116411	0.00719428	0.10564	-0.0024597	0.0257419	1.01171	0.997543	1.02608
eqtl-a-ENSG00000205309	cardiac function	ENSG00000205309 || id:eqtl-a-ENSG00000205309	Inverse variance weighted	5	0.0116411	0.00719428	0.10564	-0.0024597	0.0257419	1.01171	0.997543	1.02608
ebi-a-GCST90018657	cardiac function	Myocardial infarction || id:ebi-a-GCST90018657	Inverse variance weighted	20	-0.000145946	0.00775672	0.984988	-0.0153491	0.0150572	0.999854	0.984768	1.01517
ebi-a-GCST000755	cardiac function	HDL cholesterol || id:ebi-a-GCST000755	Inverse variance weighted	33	-0.0102118	0.0114045	0.370562	-0.0325647	0.012141	0.98984	0.96796	1.01222
ebi-a-GCST90018685	cardiac function	Prostate cancer || id:ebi-a-GCST90018685	Inverse variance weighted	16	0.000397891	0.00432525	0.926704	-0.0080796	0.00887538	1.0004	0.991953	1.00891
ebi-a-GCST90018690	cardiac function	Rheumatoid arthritis || id:ebi-a-GCST90018690	Inverse variance weighted	3	0.00535959	0.0135237	0.691875	-0.0211468	0.031866	1.00537	0.979075	1.03238
ebi-a-GCST000755	cardiac function	HDL cholesterol || id:ebi-a-GCST000755	Inverse variance weighted	33	-0.0102118	0.0114045	0.370562	-0.0325647	0.012141	0.98984	0.96796	1.01222
ebi-a-GCST90018695	cardiac function	Stable angina pectoris || id:ebi-a-GCST90018695	Inverse variance weighted	13	-8.11139e-05	0.0117002	0.994469	-0.0230135	0.0228513	0.999919	0.977249	1.02311
eqtl-a-ENSG00000206177	cardiac function	ENSG00000206177 || id:eqtl-a-ENSG00000206177	Inverse variance weighted	16	-0.00163078	0.00654823	0.803329	-0.0144653	0.0112037	0.998371	0.985639	1.01127
eqtl-a-ENSG00000206177	cardiac function	ENSG00000206177 || id:eqtl-a-ENSG00000206177	Inverse variance weighted	16	-0.00163078	0.00654823	0.803329	-0.0144653	0.0112037	0.998371	0.985639	1.01127
ebi-a-GCST90018706	cardiac function	Type 2 diabetes || id:ebi-a-GCST90018706	Inverse variance weighted	45	-0.0131241	0.00564302	0.0200332	-0.0241844	-0.00206379	0.986962	0.976106	0.997938
ebi-a-GCST90018712	cardiac function	Unstable angina pectoris || id:ebi-a-GCST90018712	Inverse variance weighted	6	-0.0128873	0.0115681	0.265265	-0.0355608	0.00978623	0.987195	0.965064	1.00983
eqtl-a-ENSG00000206561	cardiac function	ENSG00000206561 || id:eqtl-a-ENSG00000206561	Inverse variance weighted	5	-0.00181399	0.00752565	0.809523	-0.0165643	0.0129363	0.998188	0.983572	1.01302
eqtl-a-ENSG00000206561	cardiac function	ENSG00000206561 || id:eqtl-a-ENSG00000206561	Inverse variance weighted	5	-0.00181399	0.00752565	0.809523	-0.0165643	0.0129363	0.998188	0.983572	1.01302
ebi-a-GCST90018714	cardiac function	Uterine fibroids || id:ebi-a-GCST90018714	Inverse variance weighted	8	0.0121859	0.0139989	0.384033	-0.0152519	0.0396237	1.01226	0.984864	1.04042
ebi-a-GCST90018715	cardiac function	Urolithiasis || id:ebi-a-GCST90018715	Inverse variance weighted	11	-0.00908635	0.0126341	0.472023	-0.0338492	0.0156765	0.990955	0.966717	1.0158
ebi-a-GCST000758	cardiac function	Triglycerides || id:ebi-a-GCST000758	Inverse variance weighted	23	0.0173434	0.0207008	0.402134	-0.0232301	0.0579169	1.01749	0.977038	1.05963
ebi-a-GCST90018722	cardiac function	Serum alkaline phosphatase levels || id:ebi-a-GCST90018722	Inverse variance weighted	19	0.0254815	0.0157019	0.104625	-0.00529416	0.0562573	1.02581	0.99472	1.05787
ebi-a-GCST90018723	cardiac function	Alanine aminotransferase levels || id:ebi-a-GCST90018723	Inverse variance weighted	17	0.0162127	0.0458345	0.723547	-0.0736229	0.106048	1.01634	0.929022	1.11188
eqtl-a-ENSG00000211456	cardiac function	ENSG00000211456 || id:eqtl-a-ENSG00000211456	Inverse variance weighted	5	0.00213822	0.00640884	0.738654	-0.0104231	0.0146995	1.00214	0.989631	1.01481
eqtl-a-ENSG00000211456	cardiac function	ENSG00000211456 || id:eqtl-a-ENSG00000211456	Inverse variance weighted	5	0.00213822	0.00640884	0.738654	-0.0104231	0.0146995	1.00214	0.989631	1.01481
ebi-a-GCST90018724	cardiac function	Aspartate aminotransferase levels || id:ebi-a-GCST90018724	Inverse variance weighted	19	0.00988505	0.037901	0.794237	-0.0644009	0.084171	1.00993	0.937629	1.08781
ebi-a-GCST90018725	cardiac function	Serum albumin levels || id:ebi-a-GCST90018725	Inverse variance weighted	11	-0.0811748	0.037528	0.0305378	-0.15473	-0.00761986	0.922033	0.856647	0.992409
ebi-a-GCST90018726	cardiac function	Basophil count || id:ebi-a-GCST90018726	Inverse variance weighted	16	0.0273952	0.0232712	0.239111	-0.0182165	0.0730068	1.02777	0.981948	1.07574
ebi-a-GCST90018727	cardiac function	Body mass index || id:ebi-a-GCST90018727	Inverse variance weighted	38	-0.0124538	0.0230769	0.58943	-0.0576846	0.032777	0.987623	0.943948	1.03332
ebi-a-GCST90018728	cardiac function	Blood urea nitrogen levels || id:ebi-a-GCST90018728	Inverse variance weighted	20	-0.0492332	0.0426807	0.248695	-0.132887	0.0344209	0.951959	0.875564	1.03502
ebi-a-GCST90018729	cardiac function	Weight || id:ebi-a-GCST90018729	Inverse variance weighted	68	-0.0412941	0.0225373	0.0669134	-0.0854671	0.00287901	0.959547	0.918083	1.00288
ebi-a-GCST000758	cardiac function	Triglycerides || id:ebi-a-GCST000758	Inverse variance weighted	23	0.0173434	0.0207008	0.402134	-0.0232301	0.0579169	1.01749	0.977038	1.05963
ebi-a-GCST90018730	cardiac function	C-reactive protein || id:ebi-a-GCST90018730	Inverse variance weighted	4	-0.0145747	0.0275144	0.596313	-0.0685029	0.0393536	0.985531	0.933791	1.04014
ebi-a-GCST90018731	cardiac function	Calcium levels || id:ebi-a-GCST90018731	Inverse variance weighted	6	-0.0212457	0.0424554	0.616776	-0.104458	0.0619668	0.978978	0.900812	1.06393
ebi-a-GCST90018732	cardiac function	Diastolic blood pressure || id:ebi-a-GCST90018732	Inverse variance weighted	11	0.0196953	0.043972	0.654222	-0.0664898	0.10588	1.01989	0.935672	1.11169
ebi-a-GCST90018733	cardiac function	Eosinophil counts || id:ebi-a-GCST90018733	Inverse variance weighted	20	-0.00739212	0.0122915	0.547573	-0.0314835	0.0166992	0.992635	0.969007	1.01684
ebi-a-GCST90018734	cardiac function	Gamma glutamyl transpeptidase || id:ebi-a-GCST90018734	Inverse variance weighted	31	-0.00700902	0.0203816	0.730929	-0.0469569	0.0329389	0.993015	0.954128	1.03349
ebi-a-GCST90018735	cardiac function	Glucose levels || id:ebi-a-GCST90018735	Inverse variance weighted	10	0.00796141	0.0476447	0.867292	-0.0854222	0.101345	1.00799	0.918125	1.10666
ebi-a-GCST90018736	cardiac function	HDL cholesterol || id:ebi-a-GCST90018736	Inverse variance weighted	24	0.0174693	0.0103502	0.091446	-0.00281713	0.0377557	1.01762	0.997187	1.03848
ebi-a-GCST90018737	cardiac function	Hemoglobin || id:ebi-a-GCST90018737	Inverse variance weighted	19	-0.000620325	0.042934	0.988472	-0.084771	0.0835303	0.99938	0.918723	1.08712
ebi-a-GCST90018738	cardiac function	Hemoglobin A1c levels || id:ebi-a-GCST90018738	Inverse variance weighted	14	0.0140062	0.0331439	0.672595	-0.0509558	0.0789682	1.0141	0.950321	1.08217
ebi-a-GCST90018739	cardiac function	Height || id:ebi-a-GCST90018739	Inverse variance weighted	173	-0.00720425	0.0173177	0.677407	-0.041147	0.0267385	0.992822	0.959688	1.0271
ebi-a-GCST000759	cardiac function	LDL cholesterol || id:ebi-a-GCST000759	Inverse variance weighted	29	-0.0163336	0.0092381	0.0770498	-0.0344403	0.0017731	0.983799	0.966146	1.00177
ebi-a-GCST90018740	cardiac function	Hematocrit || id:ebi-a-GCST90018740	Inverse variance weighted	24	0.0138597	0.0313582	0.658504	-0.0476024	0.0753218	1.01396	0.953513	1.07823
ebi-a-GCST90018741	cardiac function	LDL cholesterol || id:ebi-a-GCST90018741	Inverse variance weighted	13	0.0151692	0.0145426	0.296909	-0.0133344	0.0436728	1.01528	0.986754	1.04464
ebi-a-GCST90018742	cardiac function	Lymphocyte count || id:ebi-a-GCST90018742	Inverse variance weighted	7	-0.0221766	0.0335005	0.507984	-0.0878375	0.0434843	0.978067	0.91591	1.04444
ebi-a-GCST90018743	cardiac function	Mean arterial pressure || id:ebi-a-GCST90018743	Inverse variance weighted	16	0.00797353	0.0356529	0.823035	-0.0619061	0.0778532	1.00801	0.939971	1.08096
ebi-a-GCST90018744	cardiac function	Mean corpuscular hemoglobin || id:ebi-a-GCST90018744	Inverse variance weighted	55	-0.0021406	0.0123373	0.862253	-0.0263217	0.0220405	0.997862	0.974022	1.02229
ebi-a-GCST90018745	cardiac function	Mean corpuscular hemoglobin concentration || id:ebi-a-GCST90018745	Inverse variance weighted	30	-0.0154537	0.0233733	0.508504	-0.0612654	0.030358	0.984665	0.940574	1.03082
ebi-a-GCST90018746	cardiac function	Mean corpuscular volume || id:ebi-a-GCST90018746	Inverse variance weighted	62	0.00695249	0.0136821	0.611352	-0.0198645	0.0337694	1.00698	0.980332	1.03435
ebi-a-GCST90018747	cardiac function	Monocyte count || id:ebi-a-GCST90018747	Inverse variance weighted	34	-0.0134986	0.0213101	0.526447	-0.0552664	0.0282691	0.986592	0.946233	1.02867
ebi-a-GCST90018748	cardiac function	Neutrophil count || id:ebi-a-GCST90018748	Inverse variance weighted	12	-0.000564813	0.0263466	0.982896	-0.0522041	0.0510745	0.999435	0.949135	1.0524
ebi-a-GCST90018749	cardiac function	Platelet count || id:ebi-a-GCST90018749	Inverse variance weighted	77	0.000982417	0.0161113	0.951378	-0.0305958	0.0325606	1.00098	0.969868	1.0331
ebi-a-GCST000759	cardiac function	LDL cholesterol || id:ebi-a-GCST000759	Inverse variance weighted	29	-0.0163336	0.0092381	0.0770498	-0.0344403	0.0017731	0.983799	0.966146	1.00177
ebi-a-GCST90018750	cardiac function	Pulse pressure || id:ebi-a-GCST90018750	Inverse variance weighted	7	-0.100964	0.0675565	0.135043	-0.233374	0.031447	0.903966	0.791857	1.03195
ebi-a-GCST90018751	cardiac function	Red blood cell count || id:ebi-a-GCST90018751	Inverse variance weighted	39	0.00208422	0.0178217	0.906901	-0.0328463	0.0370147	1.00209	0.967687	1.03771
ebi-a-GCST90018752	cardiac function	Systolic blood pressure || id:ebi-a-GCST90018752	Inverse variance weighted	16	0.0196388	0.0362776	0.588268	-0.0514653	0.0907429	1.01983	0.949837	1.09499
ebi-a-GCST90018753	cardiac function	Total bilirubin levels || id:ebi-a-GCST90018753	Inverse variance weighted	9	-0.0108354	0.0135765	0.424813	-0.0374454	0.0157746	0.989223	0.963247	1.0159
ebi-a-GCST90018754	cardiac function	Total cholesterol levels || id:ebi-a-GCST90018754	Inverse variance weighted	23	0.0324011	0.0150786	0.0316496	0.00284697	0.0619552	1.03293	1.00285	1.06391
ebi-a-GCST90018755	cardiac function	Triglycerides || id:ebi-a-GCST90018755	Inverse variance weighted	22	-0.0288993	0.0149355	0.0529978	-0.0581729	0.000374303	0.971514	0.943487	1.00037
ebi-a-GCST90018756	cardiac function	Serum total protein level || id:ebi-a-GCST90018756	Inverse variance weighted	20	-0.0418726	0.0285148	0.141982	-0.0977617	0.0140164	0.958992	0.906865	1.01412
ebi-a-GCST90018757	cardiac function	Serum uric acid levels || id:ebi-a-GCST90018757	Inverse variance weighted	26	-0.0272168	0.0146248	0.0627442	-0.0558815	0.00144786	0.97315	0.945651	1.00145
ebi-a-GCST90018758	cardiac function	White blood cell count || id:ebi-a-GCST90018758	Inverse variance weighted	33	0.0330766	0.0236204	0.161412	-0.0132195	0.0793726	1.03363	0.986868	1.08261
ebi-a-GCST90018759	cardiac function	Serum creatinine levels || id:ebi-a-GCST90018759	Inverse variance weighted	37	0.0219695	0.0367865	0.550363	-0.050132	0.0940711	1.02221	0.951104	1.09864
ebi-a-GCST000760	cardiac function	Cholesterol, total || id:ebi-a-GCST000760	Inverse variance weighted	34	-0.0158124	0.00945923	0.0945958	-0.0343525	0.00272769	0.984312	0.966231	1.00273
ebi-a-GCST90018761	cardiac function	Medication use (drugs used in diabetes) || id:ebi-a-GCST90018761	Inverse variance weighted	29	-0.0101591	0.00853679	0.23403	-0.0268912	0.00657297	0.989892	0.973467	1.00659
ebi-a-GCST90018762	cardiac function	Medication use (antithrombotic agents) || id:ebi-a-GCST90018762	Inverse variance weighted	9	-0.0137426	0.0297531	0.644162	-0.0720586	0.0445734	0.986351	0.930476	1.04558
ebi-a-GCST90018763	cardiac function	Medication use (vasodilators used in cardiac diseases) || id:ebi-a-GCST90018763	Inverse variance weighted	8	-0.0133786	0.0199835	0.503187	-0.0525463	0.0257891	0.98671	0.94881	1.02612
ebi-a-GCST90018766	cardiac function	Medication use (beta blocking agents) || id:ebi-a-GCST90018766	Inverse variance weighted	4	0.0376177	0.0598431	0.529608	-0.0796748	0.15491	1.03833	0.923417	1.16755
ebi-a-GCST90018767	cardiac function	Medication use (calcium channel blockers) || id:ebi-a-GCST90018767	Inverse variance weighted	8	-0.0679359	0.0229146	0.00302934	-0.112848	-0.0230233	0.93432	0.893286	0.97724
ebi-a-GCST90018768	cardiac function	Medication use (agents acting on the renin-angiotensin system) || id:ebi-a-GCST90018768	Inverse variance weighted	4	-0.11891	0.0346134	0.000591723	-0.186753	-0.051068	0.887887	0.829649	0.950214
ebi-a-GCST90018769	cardiac function	Medication use (HMG CoA reductase inhibitors) || id:ebi-a-GCST90018769	Inverse variance weighted	19	0.00677109	0.0104686	0.517761	-0.0137474	0.0272895	1.00679	0.986347	1.02767
ebi-a-GCST000760	cardiac function	Cholesterol, total || id:ebi-a-GCST000760	Inverse variance weighted	34	-0.0158124	0.00945923	0.0945958	-0.0343525	0.00272769	0.984312	0.966231	1.00273
ebi-a-GCST90018775	cardiac function	Medication use (salicylic acid and derivatives) || id:ebi-a-GCST90018775	Inverse variance weighted	13	-0.0205296	0.0229119	0.370241	-0.065437	0.0243778	0.97968	0.936658	1.02468
eqtl-a-ENSG00000213625	cardiac function	ENSG00000213625 || id:eqtl-a-ENSG00000213625	Inverse variance weighted	5	0.00874734	0.0062101	0.158964	-0.00342447	0.0209191	1.00879	0.996581	1.02114
eqtl-a-ENSG00000213625	cardiac function	ENSG00000213625 || id:eqtl-a-ENSG00000213625	Inverse variance weighted	5	0.00874734	0.0062101	0.158964	-0.00342447	0.0209191	1.00879	0.996581	1.02114
eqtl-a-ENSG00000213694	cardiac function	ENSG00000213694 || id:eqtl-a-ENSG00000213694	Inverse variance weighted	5	-0.0228902	0.00983299	0.0199174	-0.0421629	-0.00361756	0.97737	0.958714	0.996389
eqtl-a-ENSG00000213694	cardiac function	ENSG00000213694 || id:eqtl-a-ENSG00000213694	Inverse variance weighted	5	-0.0228902	0.00983299	0.0199174	-0.0421629	-0.00361756	0.97737	0.958714	0.996389
ebi-a-GCST90018783	cardiac function	Aortic aneurysm || id:ebi-a-GCST90018783	Inverse variance weighted	4	-0.0197807	0.0114936	0.0852461	-0.0423081	0.00274666	0.980414	0.958574	1.00275
ebi-a-GCST90018784	cardiac function	Atopic dermatitis || id:ebi-a-GCST90018784	Inverse variance weighted	7	0.0197815	0.0126866	0.118938	-0.0050842	0.0446473	1.01998	0.994929	1.04566
ebi-a-GCST90018793	cardiac function	Angina pectoris || id:ebi-a-GCST90018793	Inverse variance weighted	26	-0.00920163	0.0100467	0.359729	-0.0288932	0.01049	0.990841	0.97152	1.01055
ebi-a-GCST90018795	cardiac function	Asthma || id:ebi-a-GCST90018795	Inverse variance weighted	34	-0.00649777	0.0112862	0.564799	-0.0286187	0.0156232	0.993523	0.971787	1.01575
ebi-a-GCST90018799	cardiac function	Breast cancer || id:ebi-a-GCST90018799	Inverse variance weighted	30	-0.00180892	0.00650833	0.781059	-0.0145653	0.0109474	0.998193	0.98554	1.01101
eqtl-a-ENSG00000214253	cardiac function	ENSG00000214253 || id:eqtl-a-ENSG00000214253	Inverse variance weighted	5	0.0025387	0.0147575	0.863416	-0.0263861	0.0314635	1.00254	0.973959	1.03196
eqtl-a-ENSG00000214253	cardiac function	ENSG00000214253 || id:eqtl-a-ENSG00000214253	Inverse variance weighted	5	0.0025387	0.0147575	0.863416	-0.0263861	0.0314635	1.00254	0.973959	1.03196
ebi-a-GCST90018806	cardiac function	Chronic heart failure || id:ebi-a-GCST90018806	Inverse variance weighted	5	0.0226869	0.0589913	0.700548	-0.092936	0.13831	1.02295	0.911252	1.14833
ebi-a-GCST90018808	cardiac function	Colorectal cancer || id:ebi-a-GCST90018808	Inverse variance weighted	16	-0.00321653	0.00907216	0.722927	-0.020998	0.0145649	0.996789	0.979221	1.01467
eqtl-a-ENSG00000214548	cardiac function	ENSG00000214548 || id:eqtl-a-ENSG00000214548	Inverse variance weighted	5	-0.00673889	0.0106335	0.526251	-0.0275806	0.0141029	0.993284	0.972796	1.0142
eqtl-a-ENSG00000214548	cardiac function	ENSG00000214548 || id:eqtl-a-ENSG00000214548	Inverse variance weighted	5	-0.00673889	0.0106335	0.526251	-0.0275806	0.0141029	0.993284	0.972796	1.0142
ebi-a-GCST90018813	cardiac function	Carpal tunnel syndrome || id:ebi-a-GCST90018813	Inverse variance weighted	4	-0.0223858	0.0290982	0.441704	-0.0794182	0.0346466	0.977863	0.923654	1.03525
ebi-a-GCST90018814	cardiac function	Cataracts || id:ebi-a-GCST90018814	Inverse variance weighted	9	-0.0177148	0.025219	0.482406	-0.067144	0.0317144	0.982441	0.935061	1.03222
ebi-a-GCST000964	cardiac function	Ulcerative colitis || id:ebi-a-GCST000964	Inverse variance weighted	21	-0.010468	0.0056403	0.0634636	-0.021523	0.00058699	0.989587	0.978707	1.00059
ebi-a-GCST90018818	cardiac function	Cholecystitis || id:ebi-a-GCST90018818	Inverse variance weighted	11	-0.00654399	0.00974247	0.501776	-0.0256392	0.0125512	0.993477	0.974687	1.01263
ebi-a-GCST90018819	cardiac function	Cholelithiasis || id:ebi-a-GCST90018819	Inverse variance weighted	29	0.00332068	0.00761767	0.662896	-0.01161	0.0182513	1.00333	0.988457	1.01842
ebi-a-GCST000964	cardiac function	Ulcerative colitis || id:ebi-a-GCST000964	Inverse variance weighted	21	-0.010468	0.0056403	0.0634636	-0.021523	0.00058699	0.989587	0.978707	1.00059
ebi-a-GCST90018839	cardiac function	Endometriosis || id:ebi-a-GCST90018839	Inverse variance weighted	4	0.0078021	0.0162965	0.632109	-0.024139	0.0397432	1.00783	0.97615	1.04054
ebi-a-GCST000998	cardiac function	Coronary heart disease || id:ebi-a-GCST000998	Inverse variance weighted	13	-0.0134314	0.00925981	0.146917	-0.0315807	0.0047178	0.986658	0.968913	1.00473
ebi-a-GCST90018847	cardiac function	Graves' disease || id:ebi-a-GCST90018847	Inverse variance weighted	13	-0.00461148	0.00790954	0.559875	-0.0201142	0.0108912	0.995399	0.980087	1.01095
ebi-a-GCST90018852	cardiac function	Glaucoma || id:ebi-a-GCST90018852	Inverse variance weighted	20	0.00523568	0.00829377	0.527858	-0.0110201	0.0214915	1.00525	0.98904	1.02172
ebi-a-GCST90018853	cardiac function	Goiter || id:ebi-a-GCST90018853	Inverse variance weighted	10	0.00635694	0.00670866	0.343347	-0.00679203	0.0195059	1.00638	0.993231	1.0197
ebi-a-GCST90018855	cardiac function	Hashimoto thyroiditis || id:ebi-a-GCST90018855	Inverse variance weighted	2	-0.00176207	0.0150303	0.906674	-0.0312214	0.0276973	0.998239	0.969261	1.02808
ebi-a-GCST000998	cardiac function	Coronary heart disease || id:ebi-a-GCST000998	Inverse variance weighted	13	-0.0134314	0.00925981	0.146917	-0.0315807	0.0047178	0.986658	0.968913	1.00473
ebi-a-GCST90018860	cardiac function	Hyperthyroidism || id:ebi-a-GCST90018860	Inverse variance weighted	6	0.00430037	0.0103052	0.676458	-0.0158978	0.0244985	1.00431	0.984228	1.0248
ebi-a-GCST90018862	cardiac function	Hypothyroidism || id:ebi-a-GCST90018862	Inverse variance weighted	29	-0.00578279	0.00729741	0.428102	-0.0200857	0.00852014	0.994234	0.980115	1.00856
ebi-a-GCST90018864	cardiac function	Ischemic stroke || id:ebi-a-GCST90018864	Inverse variance weighted	10	-0.0403604	0.0206354	0.0504793	-0.0808058	8.50114e-05	0.960443	0.922373	1.00009
ebi-a-GCST001198	cardiac function	Multiple sclerosis || id:ebi-a-GCST001198	Inverse variance weighted	18	-0.0104744	0.00818875	0.200854	-0.0265244	0.00557553	0.98958	0.973824	1.00559
ebi-a-GCST90018875	cardiac function	Lung cancer || id:ebi-a-GCST90018875	Inverse variance weighted	6	-0.0245175	0.0128197	0.0558139	-0.049644	0.000609113	0.975781	0.951568	1.00061
ebi-a-GCST90018877	cardiac function	Myocardial infarction || id:ebi-a-GCST90018877	Inverse variance weighted	46	-0.000287278	0.00650355	0.964767	-0.0130342	0.0124597	0.999713	0.98705	1.01254
eqtl-a-ENSG00000223609	cardiac function	ENSG00000223609 || id:eqtl-a-ENSG00000223609	Inverse variance weighted	5	0.0191381	0.0156559	0.221549	-0.0115475	0.0498236	1.01932	0.988519	1.05109
eqtl-a-ENSG00000223609	cardiac function	ENSG00000223609 || id:eqtl-a-ENSG00000223609	Inverse variance weighted	5	0.0191381	0.0156559	0.221549	-0.0115475	0.0498236	1.01932	0.988519	1.05109
eqtl-a-ENSG00000223855	cardiac function	ENSG00000223855 || id:eqtl-a-ENSG00000223855	Inverse variance weighted	4	0.014258	0.0155139	0.358072	-0.0161493	0.0446653	1.01436	0.98398	1.04568
eqtl-a-ENSG00000223855	cardiac function	ENSG00000223855 || id:eqtl-a-ENSG00000223855	Inverse variance weighted	4	0.014258	0.0155139	0.358072	-0.0161493	0.0446653	1.01436	0.98398	1.04568
ebi-a-GCST90018883	cardiac function	Nasal polyps || id:ebi-a-GCST90018883	Inverse variance weighted	13	-0.00900214	0.00673119	0.1811	-0.0221953	0.00419101	0.991038	0.978049	1.0042
ebi-a-GCST001198	cardiac function	Multiple sclerosis || id:ebi-a-GCST001198	Inverse variance weighted	18	-0.0104744	0.00818875	0.200854	-0.0265244	0.00557553	0.98958	0.973824	1.00559
ebi-a-GCST90018895	cardiac function	Pediatric asthma || id:ebi-a-GCST90018895	Inverse variance weighted	20	-0.0155285	0.0126436	0.219384	-0.0403099	0.00925298	0.984591	0.960492	1.0093
ebi-a-GCST90018905	cardiac function	Prostate cancer || id:ebi-a-GCST90018905	Inverse variance weighted	29	0.000505346	0.00530092	0.924051	-0.00988446	0.0108952	1.00051	0.990164	1.01095
ebi-a-GCST90018907	cardiac function	Psoriasis vulgaris || id:ebi-a-GCST90018907	Inverse variance weighted	3	0.00135884	0.0099277	0.891131	-0.0180995	0.0208171	1.00136	0.982063	1.02104
ebi-a-GCST001212	cardiac function	Proinsulin levels || id:ebi-a-GCST001212	Inverse variance weighted	7	0.00781637	0.0197772	0.692679	-0.0309469	0.0465797	1.00785	0.969527	1.04768
ebi-a-GCST90018910	cardiac function	Rheumatoid arthritis || id:ebi-a-GCST90018910	Inverse variance weighted	8	0.0176565	0.0167276	0.291181	-0.0151295	0.0504426	1.01781	0.984984	1.05174
ebi-a-GCST90018915	cardiac function	Stable angina pectoris || id:ebi-a-GCST90018915	Inverse variance weighted	32	-0.00693094	0.0091844	0.450463	-0.0249324	0.0110705	0.993093	0.975376	1.01113
ebi-a-GCST90018921	cardiac function	Skin cancer || id:ebi-a-GCST90018921	Inverse variance weighted	23	-0.00108134	0.00916313	0.90606	-0.0190411	0.0168784	0.998919	0.981139	1.01702
ebi-a-GCST90018922	cardiac function	Spinal canal stenosis || id:ebi-a-GCST90018922	Inverse variance weighted	6	0.000372374	0.0197588	0.984964	-0.0383548	0.0390996	1.00037	0.962371	1.03987
ebi-a-GCST001212	cardiac function	Proinsulin levels || id:ebi-a-GCST001212	Inverse variance weighted	7	0.00781637	0.0197772	0.692679	-0.0309469	0.0465797	1.00785	0.969527	1.04768
ebi-a-GCST90018925	cardiac function	Type 1 diabetes || id:ebi-a-GCST90018925	Inverse variance weighted	7	-0.000167557	0.0122462	0.989083	-0.0241702	0.0238351	0.999832	0.97612	1.02412
ebi-a-GCST90018926	cardiac function	Type 2 diabetes || id:ebi-a-GCST90018926	Inverse variance weighted	91	-0.00620074	0.00663652	0.350131	-0.0192083	0.00680684	0.993818	0.980975	1.00683
ebi-a-GCST90018932	cardiac function	Unstable angina pectoris || id:ebi-a-GCST90018932	Inverse variance weighted	9	-0.0199666	0.0111786	0.0740759	-0.0418767	0.00194347	0.980231	0.958988	1.00195
ebi-a-GCST90018933	cardiac function	Ulcerative colitis || id:ebi-a-GCST90018933	Inverse variance weighted	9	0.00257707	0.0111665	0.817482	-0.0193094	0.0244635	1.00258	0.980876	1.02477
ebi-a-GCST90018934	cardiac function	Uterine fibroids || id:ebi-a-GCST90018934	Inverse variance weighted	20	0.00564268	0.0131194	0.667121	-0.0200713	0.0313566	1.00566	0.980129	1.03185
ebi-a-GCST90018935	cardiac function	Urolithiasis || id:ebi-a-GCST90018935	Inverse variance weighted	19	0.00297482	0.0102007	0.770571	-0.0170186	0.0229682	1.00298	0.983125	1.02323
ebi-a-GCST001475	cardiac function	Obesity || id:ebi-a-GCST001475	Inverse variance weighted	4	-0.0267277	0.0114752	0.0198501	-0.0492191	-0.0042363	0.973626	0.951972	0.995773
ebi-a-GCST90018937	cardiac function	Uterine prolapse || id:ebi-a-GCST90018937	Inverse variance weighted	7	-0.00614343	0.0153438	0.688872	-0.0362172	0.0239304	0.993875	0.964431	1.02422
ebi-a-GCST90018939	cardiac function	Varicose veins || id:ebi-a-GCST90018939	Inverse variance weighted	28	-0.00469095	0.00846861	0.579632	-0.0212894	0.0119075	0.99532	0.978936	1.01198
ebi-a-GCST90018942	cardiac function	Serum alkaline phosphatase levels || id:ebi-a-GCST90018942	Inverse variance weighted	137	0.0226087	0.0114537	0.048392	0.000159323	0.045058	1.02287	1.00016	1.04609
eqtl-a-ENSG00000225936	cardiac function	ENSG00000225936 || id:eqtl-a-ENSG00000225936	Inverse variance weighted	4	0.0293763	0.0156642	0.0607412	-0.00132559	0.0600781	1.02981	0.998675	1.06192
eqtl-a-ENSG00000225936	cardiac function	ENSG00000225936 || id:eqtl-a-ENSG00000225936	Inverse variance weighted	4	0.0293763	0.0156642	0.0607412	-0.00132559	0.0600781	1.02981	0.998675	1.06192
ebi-a-GCST90018943	cardiac function	Alanine aminotransferase levels || id:ebi-a-GCST90018943	Inverse variance weighted	100	-0.00431154	0.0213015	0.8396	-0.0460624	0.0374394	0.995698	0.954982	1.03815
ebi-a-GCST90018944	cardiac function	Aspartate aminotransferase levels || id:ebi-a-GCST90018944	Inverse variance weighted	121	0.000818897	0.0193027	0.966161	-0.0370145	0.0386523	1.00082	0.963662	1.03941
ebi-a-GCST90018945	cardiac function	Serum albumin levels || id:ebi-a-GCST90018945	Inverse variance weighted	98	-0.0482144	0.0218562	0.0273847	-0.0910525	-0.00537638	0.952929	0.91297	0.994638
ebi-a-GCST90018946	cardiac function	Basophil count || id:ebi-a-GCST90018946	Inverse variance weighted	24	0.0253707	0.0559617	0.65029	-0.0843142	0.135056	1.0257	0.919142	1.1446
ebi-a-GCST90018947	cardiac function	Body mass index || id:ebi-a-GCST90018947	Inverse variance weighted	216	-0.0284049	0.0177538	0.109612	-0.0632023	0.00639243	0.971995	0.938754	1.00641
eqtl-a-ENSG00000226137	cardiac function	ENSG00000226137 || id:eqtl-a-ENSG00000226137	Inverse variance weighted	4	0.00665327	0.00867011	0.442855	-0.0103401	0.0236467	1.00668	0.989713	1.02393
ebi-a-GCST001475	cardiac function	Obesity || id:ebi-a-GCST001475	Inverse variance weighted	4	-0.0267277	0.0114752	0.0198501	-0.0492191	-0.0042363	0.973626	0.951972	0.995773
ebi-a-GCST90018948	cardiac function	Blood urea nitrogen levels || id:ebi-a-GCST90018948	Inverse variance weighted	101	-0.0273443	0.0227279	0.228933	-0.071891	0.0172025	0.973026	0.930632	1.01735
eqtl-a-ENSG00000226137	cardiac function	ENSG00000226137 || id:eqtl-a-ENSG00000226137	Inverse variance weighted	4	0.00665327	0.00867011	0.442855	-0.0103401	0.0236467	1.00668	0.989713	1.02393
ebi-a-GCST90018949	cardiac function	Weight || id:ebi-a-GCST90018949	Inverse variance weighted	213	-0.069131	0.0200558	0.000566988	-0.10844	-0.0298217	0.933204	0.897232	0.970619
ebi-a-GCST90018950	cardiac function	C-reactive protein || id:ebi-a-GCST90018950	Inverse variance weighted	75	-0.0108113	0.0138717	0.435756	-0.0379997	0.0163772	0.989247	0.962713	1.01651
ebi-a-GCST90018951	cardiac function	Calcium levels || id:ebi-a-GCST90018951	Inverse variance weighted	96	0.00203209	0.0181452	0.910831	-0.0335325	0.0375967	1.00203	0.967024	1.03831
ebi-a-GCST90018952	cardiac function	Diastolic blood pressure || id:ebi-a-GCST90018952	Inverse variance weighted	98	-0.0658247	0.0276346	0.0172205	-0.119988	-0.0116608	0.936295	0.886931	0.988407
ebi-a-GCST90018953	cardiac function	Eosinophil counts || id:ebi-a-GCST90018953	Inverse variance weighted	136	-0.0103683	0.0170237	0.54249	-0.0437347	0.0229981	0.989685	0.957208	1.02326
ebi-a-GCST90018954	cardiac function	Gamma glutamyl transpeptidase || id:ebi-a-GCST90018954	Inverse variance weighted	154	-0.0198723	0.0139556	0.154455	-0.0472253	0.00748064	0.980324	0.953872	1.00751
ebi-a-GCST90018955	cardiac function	Glucose levels || id:ebi-a-GCST90018955	Inverse variance weighted	54	0.0174472	0.0157168	0.266956	-0.0133577	0.0482521	1.0176	0.986731	1.04944
ebi-a-GCST90018956	cardiac function	HDL cholesterol || id:ebi-a-GCST90018956	Inverse variance weighted	124	0.0315759	0.010859	0.00363964	0.0102923	0.0528595	1.03208	1.01035	1.05428
ebi-a-GCST90018957	cardiac function	Hemoglobin || id:ebi-a-GCST90018957	Inverse variance weighted	152	0.000433466	0.0211583	0.983655	-0.0410368	0.0419037	1.00043	0.959794	1.04279
bbj-a-12	cardiac function	Basophil count || id:bbj-a-12	Inverse variance weighted	7	0.00171069	0.0313206	0.956442	-0.0596776	0.063099	1.00171	0.942068	1.06513
ebi-a-GCST90018958	cardiac function	Hemoglobin A1c levels || id:ebi-a-GCST90018958	Inverse variance weighted	135	0.00869705	0.0105501	0.409735	-0.0119811	0.0293752	1.00873	0.98809	1.02981
ebi-a-GCST90018959	cardiac function	Height || id:ebi-a-GCST90018959	Inverse variance weighted	345	-0.0233183	0.0135461	0.0851768	-0.0498686	0.00323198	0.976951	0.951354	1.00324
ebi-a-GCST90018960	cardiac function	Hematocrit || id:ebi-a-GCST90018960	Inverse variance weighted	131	0.0261849	0.0212192	0.217195	-0.0154047	0.0677744	1.02653	0.984713	1.07012
ebi-a-GCST90018961	cardiac function	LDL cholesterol || id:ebi-a-GCST90018961	Inverse variance weighted	79	-0.000677123	0.0101519	0.946821	-0.0205749	0.0192207	0.999323	0.979635	1.01941
ebi-a-GCST90018962	cardiac function	Lymphocyte count || id:ebi-a-GCST90018962	Inverse variance weighted	174	-0.0136898	0.0152829	0.370383	-0.0436443	0.0162647	0.986404	0.957294	1.0164
eqtl-a-ENSG00000227051	cardiac function	ENSG00000227051 || id:eqtl-a-ENSG00000227051	Inverse variance weighted	4	-0.00488408	0.00667414	0.464296	-0.0179654	0.00819724	0.995128	0.982195	1.00823
eqtl-a-ENSG00000227051	cardiac function	ENSG00000227051 || id:eqtl-a-ENSG00000227051	Inverse variance weighted	4	-0.00488408	0.00667414	0.464296	-0.0179654	0.00819724	0.995128	0.982195	1.00823
ebi-a-GCST90018963	cardiac function	Mean arterial pressure || id:ebi-a-GCST90018963	Inverse variance weighted	106	-0.0180451	0.025146	0.472995	-0.0673312	0.031241	0.982117	0.934886	1.03173
ebi-a-GCST90018964	cardiac function	Mean corpuscular hemoglobin || id:ebi-a-GCST90018964	Inverse variance weighted	166	0.0106467	0.0100692	0.290349	-0.00908889	0.0303823	1.0107	0.990952	1.03085
ebi-a-GCST90018965	cardiac function	Mean corpuscular hemoglobin concentration || id:ebi-a-GCST90018965	Inverse variance weighted	60	0.0118933	0.0212145	0.575058	-0.0296872	0.0534738	1.01196	0.970749	1.05493
ebi-a-GCST90018966	cardiac function	Mean corpuscular volume || id:ebi-a-GCST90018966	Inverse variance weighted	180	0.0108775	0.0104703	0.298854	-0.00964426	0.0313993	1.01094	0.990402	1.0319
ebi-a-GCST90018967	cardiac function	Monocyte count || id:ebi-a-GCST90018967	Inverse variance weighted	133	0.00358834	0.0146357	0.806319	-0.0250975	0.0322742	1.00359	0.975215	1.0328
ebi-a-GCST90018968	cardiac function	Neutrophil count || id:ebi-a-GCST90018968	Inverse variance weighted	131	-0.00468393	0.0156902	0.765302	-0.0354367	0.0260688	0.995327	0.965184	1.02641
ebi-a-GCST90018969	cardiac function	Platelet count || id:ebi-a-GCST90018969	Inverse variance weighted	223	-0.00288399	0.0105699	0.78497	-0.0236011	0.0178331	0.99712	0.976675	1.01799
ebi-a-GCST90018970	cardiac function	Pulse pressure || id:ebi-a-GCST90018970	Inverse variance weighted	146	0.0591897	0.0221753	0.007604	0.015726	0.102653	1.06098	1.01585	1.10811
ebi-a-GCST90018971	cardiac function	Red blood cell count || id:ebi-a-GCST90018971	Inverse variance weighted	188	-0.0182152	0.0154147	0.237335	-0.0484281	0.0119977	0.98195	0.952726	1.01207
ebi-a-GCST90018972	cardiac function	Systolic blood pressure || id:ebi-a-GCST90018972	Inverse variance weighted	127	0.00283498	0.0262626	0.914038	-0.0486398	0.0543097	1.00284	0.952524	1.05581
ebi-a-GCST90018973	cardiac function	Total bilirubin levels || id:ebi-a-GCST90018973	Inverse variance weighted	70	0.00122097	0.00636254	0.847821	-0.0112496	0.0136916	1.00122	0.988813	1.01379
ebi-a-GCST90018974	cardiac function	Total cholesterol levels || id:ebi-a-GCST90018974	Inverse variance weighted	92	0.00696932	0.0113363	0.5387	-0.0152498	0.0291885	1.00699	0.984866	1.02962
ebi-a-GCST90018975	cardiac function	Triglycerides || id:ebi-a-GCST90018975	Inverse variance weighted	122	-0.0316735	0.0120538	0.00859704	-0.055299	-0.00804804	0.968823	0.946202	0.991984
ebi-a-GCST90018976	cardiac function	Serum total protein level || id:ebi-a-GCST90018976	Inverse variance weighted	113	-0.000607954	0.022212	0.978164	-0.0441435	0.0429276	0.999392	0.956817	1.04386
ebi-a-GCST90018977	cardiac function	Serum uric acid levels || id:ebi-a-GCST90018977	Inverse variance weighted	126	0.000434597	0.0187086	0.981467	-0.0362343	0.0371035	1.00043	0.964414	1.0378
ebi-a-GCST90018978	cardiac function	White blood cell count || id:ebi-a-GCST90018978	Inverse variance weighted	158	-0.0203511	0.016502	0.217481	-0.0526949	0.0119927	0.979855	0.948669	1.01206
ebi-a-GCST90018979	cardiac function	Serum creatinine levels || id:ebi-a-GCST90018979	Inverse variance weighted	174	-0.00217466	0.0190023	0.908887	-0.0394192	0.0350698	0.997828	0.961348	1.03569
ebi-a-GCST90018981	cardiac function	Medication use (drugs used in diabetes) || id:ebi-a-GCST90018981	Inverse variance weighted	63	-0.00629655	0.00608967	0.30115	-0.0182323	0.00563921	0.993723	0.981933	1.00566
ebi-a-GCST90018982	cardiac function	Medication use (antithrombotic agents) || id:ebi-a-GCST90018982	Inverse variance weighted	17	-0.0190074	0.023174	0.4121	-0.0644285	0.0264137	0.981172	0.937603	1.02677
ebi-a-GCST90018983	cardiac function	Medication use (vasodilators used in cardiac diseases) || id:ebi-a-GCST90018983	Inverse variance weighted	15	-0.0103202	0.0117456	0.379595	-0.0333416	0.0127012	0.989733	0.967208	1.01278
ebi-a-GCST90018985	cardiac function	Medication use (diuretics) || id:ebi-a-GCST90018985	Inverse variance weighted	38	-0.0154014	0.0153484	0.315643	-0.0454843	0.0146815	0.984717	0.955535	1.01479
ebi-a-GCST90018986	cardiac function	Medication use (beta blocking agents) || id:ebi-a-GCST90018986	Inverse variance weighted	43	-0.0235483	0.0144962	0.10428	-0.0519607	0.00486423	0.976727	0.949366	1.00488
ebi-a-GCST90018987	cardiac function	Medication use (calcium channel blockers) || id:ebi-a-GCST90018987	Inverse variance weighted	53	-0.0470443	0.0107972	1.31817e-05	-0.0682069	-0.0258817	0.954045	0.934067	0.97445
ebi-a-GCST90018988	cardiac function	Medication use (agents acting on the renin-angiotensin system) || id:ebi-a-GCST90018988	Inverse variance weighted	101	-0.0204201	0.0121023	0.0915474	-0.0441406	0.00330041	0.979787	0.956819	1.00331
ebi-a-GCST90018989	cardiac function	Medication use (HMG CoA reductase inhibitors) || id:ebi-a-GCST90018989	Inverse variance weighted	51	-0.00257218	0.00937221	0.783741	-0.0209417	0.0157974	0.997431	0.979276	1.01592
ebi-a-GCST90018990	cardiac function	Medication use (thyroid preparations) || id:ebi-a-GCST90018990	Inverse variance weighted	54	-0.00965048	0.00600158	0.107838	-0.0214136	0.00211262	0.990396	0.978814	1.00211
ebi-a-GCST90018993	cardiac function	Medication use (drugs affecting bone structure and mineralization) || id:ebi-a-GCST90018993	Inverse variance weighted	6	-0.00595232	0.0204937	0.771475	-0.04612	0.0342154	0.994065	0.954927	1.03481
ebi-a-GCST90018995	cardiac function	Medication use (salicylic acid and derivatives) || id:ebi-a-GCST90018995	Inverse variance weighted	13	-0.0230098	0.0208211	0.269108	-0.0638192	0.0177996	0.977253	0.938175	1.01796
ebi-a-GCST90018996	cardiac function	Medication use (anilides) || id:ebi-a-GCST90018996	Inverse variance weighted	5	-0.0709859	0.0356907	0.04671	-0.14094	-0.00103218	0.931475	0.868542	0.998968
ebi-a-GCST90018997	cardiac function	Medication use (antimigraine preparations) || id:ebi-a-GCST90018997	Inverse variance weighted	10	-0.0128089	0.00964826	0.184314	-0.0317195	0.00610167	0.987273	0.968778	1.00612
ebi-a-GCST001791	cardiac function	Urate levels || id:ebi-a-GCST001791	Inverse variance weighted	20	-0.00655463	0.0121571	0.589775	-0.0303825	0.0172733	0.993467	0.970074	1.01742
ebi-a-GCST90018999	cardiac function	Medication use (adrenergics, inhalants) || id:ebi-a-GCST90018999	Inverse variance weighted	29	0.00462917	0.0101247	0.647515	-0.0152152	0.0244735	1.00464	0.9849	1.02478
ebi-a-GCST90019000	cardiac function	Medication use (glucocorticoids) || id:ebi-a-GCST90019000	Inverse variance weighted	14	-0.0214989	0.0121624	0.0771185	-0.0453372	0.00233937	0.978731	0.955675	1.00234
ebi-a-GCST90019001	cardiac function	Medication use (antihistamines for systemic use) || id:ebi-a-GCST90019001	Inverse variance weighted	4	0.00627179	0.0242205	0.795678	-0.0412005	0.0537441	1.00629	0.959637	1.05521
ebi-a-GCST90019002	cardiac function	Medication use (antiglaucoma preparations and miotics) || id:ebi-a-GCST90019002	Inverse variance weighted	11	-0.00451224	0.00812289	0.578555	-0.0204331	0.0114086	0.995498	0.979774	1.01147
eqtl-a-ENSG00000229474	cardiac function	ENSG00000229474 || id:eqtl-a-ENSG00000229474	Inverse variance weighted	3	-0.00546489	0.026454	0.836337	-0.0573146	0.0463849	0.99455	0.944297	1.04748
eqtl-a-ENSG00000229474	cardiac function	ENSG00000229474 || id:eqtl-a-ENSG00000229474	Inverse variance weighted	3	-0.00546489	0.026454	0.836337	-0.0573146	0.0463849	0.99455	0.944297	1.04748
ebi-a-GCST90019016	cardiac function	Psoriasis || id:ebi-a-GCST90019016	Inverse variance weighted	24	-0.00435271	0.00551548	0.430006	-0.015163	0.00645762	0.995657	0.984951	1.00648
ebi-a-GCST90019017	cardiac function	Psoriasis || id:ebi-a-GCST90019017	Inverse variance weighted	20	-0.00166362	0.00526095	0.751835	-0.0119751	0.00864784	0.998338	0.988096	1.00869
ebi-a-GCST90019380	cardiac function	Scavenger receptor class A member 5 measurement || id:ebi-a-GCST90019380	Inverse variance weighted	4	0.0117524	0.0144984	0.417594	-0.0166644	0.0401693	1.01182	0.983474	1.04099
eqtl-a-ENSG00000229754	cardiac function	ENSG00000229754 || id:eqtl-a-ENSG00000229754	Inverse variance weighted	6	0.0171978	0.0162588	0.290167	-0.0146694	0.0490651	1.01735	0.985438	1.05029
ebi-a-GCST001791	cardiac function	Urate levels || id:ebi-a-GCST001791	Inverse variance weighted	20	-0.00655463	0.0121571	0.589775	-0.0303825	0.0172733	0.993467	0.970074	1.01742
eqtl-a-ENSG00000229754	cardiac function	ENSG00000229754 || id:eqtl-a-ENSG00000229754	Inverse variance weighted	6	0.0171978	0.0162588	0.290167	-0.0146694	0.0490651	1.01735	0.985438	1.05029
ebi-a-GCST90019386	cardiac function	Coagulation Factor VIII measurement || id:ebi-a-GCST90019386	Inverse variance weighted	4	-0.00260804	0.0258843	0.919743	-0.0533412	0.0481251	0.997395	0.948056	1.0493
ebi-a-GCST90019391	cardiac function	Interleukin-1 receptor type 2 measurement || id:ebi-a-GCST90019391	Inverse variance weighted	4	-0.00533802	0.00997162	0.592428	-0.0248824	0.0142064	0.994676	0.975425	1.01431
ebi-a-GCST001969	cardiac function	Heart rate || id:ebi-a-GCST001969	Inverse variance weighted	15	-0.0211883	0.00268181	2.77209e-15	-0.0264447	-0.015932	0.979035	0.973902	0.984194
ebi-a-GCST90019392	cardiac function	Complement component C8 gamma chain measurement || id:ebi-a-GCST90019392	Inverse variance weighted	4	-0.0147103	0.0194004	0.448304	-0.0527351	0.0233145	0.985397	0.948631	1.02359
ebi-a-GCST90019394	cardiac function	Serum amyloid A-1 protein measurement || id:ebi-a-GCST90019394	Inverse variance weighted	5	0.00492996	0.00901717	0.584564	-0.0127437	0.0226036	1.00494	0.987337	1.02286
ebi-a-GCST001969	cardiac function	Heart rate || id:ebi-a-GCST001969	Inverse variance weighted	15	-0.0211883	0.00268181	2.77209e-15	-0.0264447	-0.015932	0.979035	0.973902	0.984194
ebi-a-GCST90019406	cardiac function	Heme oxygenase 1 measurement || id:ebi-a-GCST90019406	Inverse variance weighted	4	0.0354257	0.0203223	0.0812996	-0.00440598	0.0752573	1.03606	0.995604	1.07816
ebi-a-GCST90019411	cardiac function	Serum amyloid A-2 protein measurement || id:ebi-a-GCST90019411	Inverse variance weighted	5	0.0049946	0.00996948	0.616379	-0.0145456	0.0245348	1.00501	0.98556	1.02484
ebi-a-GCST002216	cardiac function	Triglycerides || id:ebi-a-GCST002216	Inverse variance weighted	43	-0.042405	0.0162674	0.00914081	-0.0742891	-0.0105208	0.958482	0.928403	0.989534
ebi-a-GCST90019420	cardiac function	Apolipoprotein A-I measurement || id:ebi-a-GCST90019420	Inverse variance weighted	5	-6.52122e-05	0.00859773	0.993948	-0.0169168	0.0167863	0.999935	0.983226	1.01693
ebi-a-GCST002216	cardiac function	Triglycerides || id:ebi-a-GCST002216	Inverse variance weighted	43	-0.042405	0.0162674	0.00914081	-0.0742891	-0.0105208	0.958482	0.928403	0.989534
bbj-a-12	cardiac function	Basophil count || id:bbj-a-12	Inverse variance weighted	7	0.00171069	0.0313206	0.956442	-0.0596776	0.063099	1.00171	0.942068	1.06513
ebi-a-GCST002221	cardiac function	Cholesterol, total || id:ebi-a-GCST002221	Inverse variance weighted	55	0.00916729	0.00905378	0.311281	-0.00857812	0.0269127	1.00921	0.991459	1.02728
ebi-a-GCST002221	cardiac function	Cholesterol, total || id:ebi-a-GCST002221	Inverse variance weighted	55	0.00916729	0.00905378	0.311281	-0.00857812	0.0269127	1.00921	0.991459	1.02728
ebi-a-GCST90019446	cardiac function	C-reactive protein measurement || id:ebi-a-GCST90019446	Inverse variance weighted	7	-0.000161676	0.012924	0.990019	-0.0254927	0.0251693	0.999838	0.974829	1.02549
ebi-a-GCST90019448	cardiac function	Lactadherin measurement || id:ebi-a-GCST90019448	Inverse variance weighted	6	-0.02299	0.0202965	0.257338	-0.0627713	0.0167912	0.977272	0.939158	1.01693
ebi-a-GCST90019453	cardiac function	Coagulation Factor V measurement || id:ebi-a-GCST90019453	Inverse variance weighted	3	-0.0223269	0.0190024	0.240014	-0.0595715	0.0149178	0.977921	0.942168	1.01503
ebi-a-GCST002222	cardiac function	LDL cholesterol || id:ebi-a-GCST002222	Inverse variance weighted	48	0.0096643	0.00792803	0.222843	-0.00587464	0.0252032	1.00971	0.994143	1.02552
ebi-a-GCST90019456	cardiac function	Galectin-3-binding protein measurement || id:ebi-a-GCST90019456	Inverse variance weighted	5	-0.013893	0.031338	0.65753	-0.0753155	0.0475295	0.986203	0.927451	1.04868
ebi-a-GCST002222	cardiac function	LDL cholesterol || id:ebi-a-GCST002222	Inverse variance weighted	48	0.0096643	0.00792803	0.222843	-0.00587464	0.0252032	1.00971	0.994143	1.02552
ebi-a-GCST90019466	cardiac function	Procollagen-lysine,2-oxoglutarate 5-dioxygenase 2 measurement || id:ebi-a-GCST90019466	Inverse variance weighted	6	0.0141692	0.00948726	0.135307	-0.00442584	0.0327642	1.01427	0.995584	1.03331
eqtl-a-ENSG00000234810	cardiac function	ENSG00000234810 || id:eqtl-a-ENSG00000234810	Inverse variance weighted	4	0.0493926	0.0172901	0.00428073	0.015504	0.0832811	1.05063	1.01562	1.08685
eqtl-a-ENSG00000234810	cardiac function	ENSG00000234810 || id:eqtl-a-ENSG00000234810	Inverse variance weighted	4	0.0493926	0.0172901	0.00428073	0.015504	0.0832811	1.05063	1.01562	1.08685
ebi-a-GCST90019469	cardiac function	Inter-alpha-trypsin inhibitor heavy chain H3 measurement || id:ebi-a-GCST90019469	Inverse variance weighted	4	0.00079127	0.00618022	0.898123	-0.011322	0.0129045	1.00079	0.988742	1.01299
ebi-a-GCST90019471	cardiac function	ERO1-like protein beta measurement || id:ebi-a-GCST90019471	Inverse variance weighted	4	0.0337672	0.0168886	0.0455646	0.000665484	0.0668689	1.03434	1.00067	1.06916
eqtl-a-ENSG00000235169	cardiac function	ENSG00000235169 || id:eqtl-a-ENSG00000235169	Inverse variance weighted	3	-0.00574725	0.0213705	0.787981	-0.0476334	0.036139	0.994269	0.953483	1.0368
eqtl-a-ENSG00000235169	cardiac function	ENSG00000235169 || id:eqtl-a-ENSG00000235169	Inverse variance weighted	3	-0.00574725	0.0213705	0.787981	-0.0476334	0.036139	0.994269	0.953483	1.0368
ebi-a-GCST002223	cardiac function	HDL cholesterol || id:ebi-a-GCST002223	Inverse variance weighted	62	0.0275069	0.0115996	0.017722	0.00477179	0.0502421	1.02789	1.00478	1.05153
eqtl-a-ENSG00000235505	cardiac function	ENSG00000235505 || id:eqtl-a-ENSG00000235505	Inverse variance weighted	3	-0.000911986	0.0109624	0.933699	-0.0223983	0.0205743	0.999088	0.977851	1.02079
eqtl-a-ENSG00000235505	cardiac function	ENSG00000235505 || id:eqtl-a-ENSG00000235505	Inverse variance weighted	3	-0.000911986	0.0109624	0.933699	-0.0223983	0.0205743	0.999088	0.977851	1.02079
ebi-a-GCST90019478	cardiac function	Neuronal pentraxin-1 measurement || id:ebi-a-GCST90019478	Inverse variance weighted	4	0.00644222	0.0313589	0.837232	-0.0550211	0.0679056	1.00646	0.946465	1.07026
ebi-a-GCST002223	cardiac function	HDL cholesterol || id:ebi-a-GCST002223	Inverse variance weighted	62	0.0275069	0.0115996	0.017722	0.00477179	0.0502421	1.02789	1.00478	1.05153
ebi-a-GCST90020053	cardiac function	Frailty index || id:ebi-a-GCST90020053	Inverse variance weighted	6	0.0788053	0.0903582	0.38313	-0.0982968	0.255907	1.08199	0.90638	1.29163
ebi-a-GCST90020091	cardiac function	Estradiol levels || id:ebi-a-GCST90020091	Inverse variance weighted	4	-0.0154718	0.013651	0.257053	-0.0422277	0.0112841	0.984647	0.958651	1.01135
ebi-a-GCST90020190	cardiac function	Total cerebellar volume (excluding Crus I vermis) || id:ebi-a-GCST90020190	Inverse variance weighted	14	0.00525929	0.0322529	0.870468	-0.0579564	0.0684749	1.00527	0.943691	1.07087
ebi-a-GCST90020191	cardiac function	Anterior lobe of cerebellar volume (including I to V lobules) || id:ebi-a-GCST90020191	Inverse variance weighted	12	0.01321	0.0396892	0.739259	-0.0645809	0.0910009	1.0133	0.93746	1.09527
ebi-a-GCST90020192	cardiac function	Superior Posterior lobe of cerebellar volume (including VI to Crus I hemispheric lobules) || id:ebi-a-GCST90020192	Inverse variance weighted	20	-0.0050463	0.0350085	0.885386	-0.073663	0.0635704	0.994966	0.928985	1.06563
ebi-a-GCST90020193	cardiac function	Superior Posterior lobe of cerebellar volume (including VI to Crus I vermal lobules, excluding Crus I vermis) || id:ebi-a-GCST90020193	Inverse variance weighted	12	-0.0321392	0.0340894	0.345787	-0.0989544	0.034676	0.968372	0.905784	1.03528
ebi-a-GCST002245	cardiac function	Alzheimer's disease (late onset) || id:ebi-a-GCST002245	Inverse variance weighted	7	-0.00347427	0.00413248	0.400503	-0.0115739	0.00462539	0.996532	0.988493	1.00464
ebi-a-GCST90020194	cardiac function	Inferior Posterior lobe of cerebellar volume (including Crus II to IX hemispheric lobules) || id:ebi-a-GCST90020194	Inverse variance weighted	11	0.00881356	0.0371619	0.812528	-0.0640238	0.0816509	1.00885	0.937983	1.08508
ebi-a-GCST90020195	cardiac function	Inferior Posterior lobe of cerebellar volume (including Crus II to IX vermal lobules) || id:ebi-a-GCST90020195	Inverse variance weighted	10	-0.00513509	0.045491	0.910125	-0.0942975	0.0840273	0.994878	0.910012	1.08766
ebi-a-GCST90020196	cardiac function	Flocculonodular lobe of cerebellar volume (including X hemispheric lobules) || id:ebi-a-GCST90020196	Inverse variance weighted	4	0.0492913	0.058571	0.400032	-0.0655079	0.16409	1.05053	0.936592	1.17832
ebi-a-GCST90020197	cardiac function	Flocculonodular lobe of cerebellar volume (including X vermal lobules) || id:ebi-a-GCST90020197	Inverse variance weighted	4	0.0682592	0.0542124	0.207992	-0.0379971	0.174515	1.07064	0.962716	1.19067
ebi-a-GCST90025945	cardiac function	Cystatin C levels || id:ebi-a-GCST90025945	Inverse variance weighted	226	0.0018291	0.00924359	0.84314	-0.0162883	0.0199465	1.00183	0.983844	1.02015
ebi-a-GCST90025946	cardiac function	Creatinine levels || id:ebi-a-GCST90025946	Inverse variance weighted	242	0.00448857	0.0130385	0.730655	-0.0210669	0.030044	1.0045	0.979153	1.0305
ebi-a-GCST90025948	cardiac function	Serum phosphate levels || id:ebi-a-GCST90025948	Inverse variance weighted	108	-0.01034	0.0160167	0.518552	-0.0417327	0.0210527	0.989713	0.959126	1.02128
ebi-a-GCST90025949	cardiac function	Height || id:ebi-a-GCST90025949	Inverse variance weighted	414	-0.0179748	0.00958565	0.0607683	-0.0367627	0.000813079	0.982186	0.963905	1.00081
ebi-a-GCST90025950	cardiac function	Monocyte count || id:ebi-a-GCST90025950	Inverse variance weighted	210	-0.000243096	0.0102154	0.981014	-0.0202652	0.019779	0.999757	0.979939	1.01998
ebi-a-GCST90025951	cardiac function	Platelet count || id:ebi-a-GCST90025951	Inverse variance weighted	296	0.0175964	0.00968261	0.0691681	-0.00138151	0.0365743	1.01775	0.998619	1.03725
ebi-a-GCST002245	cardiac function	Alzheimer's disease (late onset) || id:ebi-a-GCST002245	Inverse variance weighted	7	-0.00347427	0.00413248	0.400503	-0.0115739	0.00462539	0.996532	0.988493	1.00464
ebi-a-GCST90025952	cardiac function	Apolipoprotein B levels || id:ebi-a-GCST90025952	Inverse variance weighted	113	0.000622863	0.00880401	0.943599	-0.016633	0.0178787	1.00062	0.983505	1.01804
ebi-a-GCST90025953	cardiac function	Total cholesterol levels || id:ebi-a-GCST90025953	Inverse variance weighted	114	0.010048	0.0109172	0.357376	-0.0113498	0.0314457	1.0101	0.988714	1.03195
ebi-a-GCST90025954	cardiac function	Direct low density lipoprotein cholesterol levels || id:ebi-a-GCST90025954	Inverse variance weighted	103	0.0055789	0.0108303	0.60647	-0.0156485	0.0268063	1.00559	0.984473	1.02717
ebi-a-GCST90025955	cardiac function	Apolipoprotein A1 levels || id:ebi-a-GCST90025955	Inverse variance weighted	170	0.0198623	0.00960472	0.0386424	0.00103707	0.0386876	1.02006	1.00104	1.03945
ebi-a-GCST90025956	cardiac function	HDL cholesterol levels || id:ebi-a-GCST90025956	Inverse variance weighted	208	0.0271988	0.00825883	0.000990189	0.0110115	0.0433861	1.02757	1.01107	1.04434
ebi-a-GCST90025957	cardiac function	Triglyceride levels || id:ebi-a-GCST90025957	Inverse variance weighted	168	-0.0239993	0.00968721	0.0132334	-0.0429862	-0.0050124	0.976286	0.957925	0.995
ebi-a-GCST90025958	cardiac function	Sex hormone-binding globulin levels || id:ebi-a-GCST90025958	Inverse variance weighted	215	0.0124832	0.0095945	0.193231	-0.00632199	0.0312884	1.01256	0.993698	1.03178
ebi-a-GCST90025959	cardiac function	C-reactive protein levels || id:ebi-a-GCST90025959	Inverse variance weighted	134	-0.00103515	0.00993573	0.917023	-0.0205092	0.0184389	0.998965	0.9797	1.01861
ebi-a-GCST90025962	cardiac function	Mean corpuscular hemoglobin concentration || id:ebi-a-GCST90025962	Inverse variance weighted	242	0.00743147	0.00908281	0.413248	-0.0103708	0.0252338	1.00746	0.989683	1.02555
ebi-a-GCST90025963	cardiac function	Mean corpuscular volume || id:ebi-a-GCST90025963	Inverse variance weighted	250	0.00651078	0.00872856	0.455717	-0.0105972	0.0236188	1.00653	0.989459	1.0239
ebi-a-GCST002318	cardiac function	Rheumatoid arthritis || id:ebi-a-GCST002318	Inverse variance weighted	30	0.00262498	0.00715969	0.713893	-0.011408	0.016658	1.00263	0.988657	1.0168
ebi-a-GCST90025964	cardiac function	Red blood cell count || id:ebi-a-GCST90025964	Inverse variance weighted	262	-0.00996042	0.0103561	0.336152	-0.0302583	0.0103375	0.990089	0.970195	1.01039
ebi-a-GCST90025965	cardiac function	Urate levels || id:ebi-a-GCST90025965	Inverse variance weighted	196	-0.00963402	0.00904278	0.286703	-0.0273579	0.00808983	0.990412	0.973013	1.00812
ebi-a-GCST90025966	cardiac function	Gamma glutamyl transferase levels || id:ebi-a-GCST90025966	Inverse variance weighted	218	-0.0177797	0.0111975	0.112326	-0.0397269	0.00416744	0.982377	0.961052	1.00418
ebi-a-GCST90025967	cardiac function	Vitamin D levels || id:ebi-a-GCST90025967	Inverse variance weighted	55	0.0138597	0.0191473	0.469161	-0.0236691	0.0513885	1.01396	0.976609	1.05273
ebi-a-GCST90025968	cardiac function	Systolic blood pressure || id:ebi-a-GCST90025968	Inverse variance weighted	204	-0.0126587	0.0177574	0.475928	-0.0474632	0.0221459	0.987421	0.953646	1.02239
eqtl-a-ENSG00000238201	cardiac function	ENSG00000238201 || id:eqtl-a-ENSG00000238201	Inverse variance weighted	3	0.0104785	0.0123994	0.398065	-0.0138244	0.0347814	1.01053	0.986271	1.03539
eqtl-a-ENSG00000238201	cardiac function	ENSG00000238201 || id:eqtl-a-ENSG00000238201	Inverse variance weighted	3	0.0104785	0.0123994	0.398065	-0.0138244	0.0347814	1.01053	0.986271	1.03539
ebi-a-GCST90025969	cardiac function	Hemoglobin levels || id:ebi-a-GCST90025969	Inverse variance weighted	211	-0.00974514	0.0146552	0.506075	-0.0384693	0.018979	0.990302	0.962261	1.01916
eqtl-a-ENSG00000238243	cardiac function	ENSG00000238243 || id:eqtl-a-ENSG00000238243	Inverse variance weighted	4	-0.0271643	0.0214874	0.206159	-0.0692795	0.0149509	0.973201	0.933066	1.01506
eqtl-a-ENSG00000238243	cardiac function	ENSG00000238243 || id:eqtl-a-ENSG00000238243	Inverse variance weighted	4	-0.0271643	0.0214874	0.206159	-0.0692795	0.0149509	0.973201	0.933066	1.01506
ebi-a-GCST90025970	cardiac function	High light scatter reticulocyte count || id:ebi-a-GCST90025970	Inverse variance weighted	231	-0.00446382	0.0106372	0.674747	-0.0253128	0.0163851	0.995546	0.975005	1.01652
ebi-a-GCST90025971	cardiac function	Immature fraction of reticulocytes || id:ebi-a-GCST90025971	Inverse variance weighted	148	-0.00892141	0.0124487	0.473586	-0.0333208	0.015478	0.991118	0.967228	1.0156
ebi-a-GCST90025972	cardiac function	Reticulocyte count || id:ebi-a-GCST90025972	Inverse variance weighted	212	-0.00330354	0.0104698	0.752359	-0.0238244	0.0172173	0.996702	0.976457	1.01737
ebi-a-GCST90025973	cardiac function	Bilirubin levels || id:ebi-a-GCST90025973	Inverse variance weighted	132	0.00163324	0.00767592	0.831502	-0.0134116	0.016678	1.00163	0.986678	1.01682
ebi-a-GCST002318	cardiac function	Rheumatoid arthritis || id:ebi-a-GCST002318	Inverse variance weighted	30	0.00262498	0.00715969	0.713893	-0.011408	0.016658	1.00263	0.988657	1.0168
ebi-a-GCST90025974	cardiac function	Hemoglobin A1c levels || id:ebi-a-GCST90025974	Inverse variance weighted	231	-0.000479899	0.00880408	0.95653	-0.0177359	0.0167761	0.99952	0.98242	1.01692
ebi-a-GCST90025975	cardiac function	Mean reticulocyte volume || id:ebi-a-GCST90025975	Inverse variance weighted	216	0.00584225	0.0095996	0.542794	-0.012973	0.0246575	1.00586	0.987111	1.02496
ebi-a-GCST90025976	cardiac function	Mean sphered cell volume || id:ebi-a-GCST90025976	Inverse variance weighted	239	0.00774692	0.00935761	0.407742	-0.010594	0.0260878	1.00778	0.989462	1.02643
ebi-a-GCST90025977	cardiac function	Neutrophil count || id:ebi-a-GCST90025977	Inverse variance weighted	196	-0.00393542	0.0128856	0.760052	-0.0291912	0.0213203	0.996072	0.971231	1.02155
ebi-a-GCST90025978	cardiac function	Lung function (FEV1/FVC) || id:ebi-a-GCST90025978	Inverse variance weighted	233	-0.000609656	0.0125856	0.961365	-0.0252775	0.0240581	0.999391	0.975039	1.02435
ebi-a-GCST90025979	cardiac function	Alanine aminotransferase levels || id:ebi-a-GCST90025979	Inverse variance weighted	154	-0.0252021	0.0163833	0.123981	-0.0573135	0.00690923	0.975113	0.944298	1.00693
ebi-a-GCST90025980	cardiac function	Aspartate aminotransferase levels || id:ebi-a-GCST90025980	Inverse variance weighted	156	0.00702212	0.0169422	0.678526	-0.0261845	0.0402288	1.00705	0.974155	1.04105
eqtl-a-ENSG00000239961	cardiac function	ENSG00000239961 || id:eqtl-a-ENSG00000239961	Inverse variance weighted	5	-0.0171369	0.013453	0.202721	-0.0435048	0.00923092	0.983009	0.957428	1.00927
eqtl-a-ENSG00000239961	cardiac function	ENSG00000239961 || id:eqtl-a-ENSG00000239961	Inverse variance weighted	5	-0.0171369	0.013453	0.202721	-0.0435048	0.00923092	0.983009	0.957428	1.00927
ebi-a-GCST90025981	cardiac function	Diastolic blood pressure || id:ebi-a-GCST90025981	Inverse variance weighted	202	-0.0571702	0.018184	0.00166662	-0.0928108	-0.0215296	0.944433	0.911366	0.9787
ebi-a-GCST90025982	cardiac function	Heel bone mineral density T score || id:ebi-a-GCST90025982	Inverse variance weighted	314	-0.00492317	0.00833042	0.554529	-0.0212508	0.0114045	0.995089	0.978973	1.01147
ebi-a-GCST90025983	cardiac function	Direct bilirubin levels || id:ebi-a-GCST90025983	Inverse variance weighted	82	0.00352717	0.0080745	0.662236	-0.0122989	0.0193532	1.00353	0.987776	1.01954
ebi-a-GCST90025984	cardiac function	Lymphocyte count || id:ebi-a-GCST90025984	Inverse variance weighted	228	0.00422141	0.0127255	0.740095	-0.0207207	0.0291635	1.00423	0.979493	1.02959
eqtl-a-ENSG00000240344	cardiac function	ENSG00000240344 || id:eqtl-a-ENSG00000240344	Inverse variance weighted	5	-0.00209578	0.00414719	0.613314	-0.0102243	0.00603272	0.997906	0.989828	1.00605
eqtl-a-ENSG00000240344	cardiac function	ENSG00000240344 || id:eqtl-a-ENSG00000240344	Inverse variance weighted	5	-0.00209578	0.00414719	0.613314	-0.0102243	0.00603272	0.997906	0.989828	1.00605
ebi-a-GCST90025985	cardiac function	White blood cell count || id:ebi-a-GCST90025985	Inverse variance weighted	240	0.000993499	0.0128527	0.938386	-0.0241978	0.0261848	1.00099	0.976093	1.02653
ebi-a-GCST90025986	cardiac function	Blood glucose levels || id:ebi-a-GCST90025986	Inverse variance weighted	76	0.0220291	0.0141856	0.120443	-0.00577476	0.049833	1.02227	0.994242	1.0511
eqtl-a-ENSG00000240505	cardiac function	ENSG00000240505 || id:eqtl-a-ENSG00000240505	Inverse variance weighted	4	0.00958411	0.0227661	0.673769	-0.0350375	0.0542058	1.00963	0.965569	1.0557
eqtl-a-ENSG00000240505	cardiac function	ENSG00000240505 || id:eqtl-a-ENSG00000240505	Inverse variance weighted	4	0.00958411	0.0227661	0.673769	-0.0350375	0.0542058	1.00963	0.965569	1.0557
ebi-a-GCST90025987	cardiac function	Eosinophil counts || id:ebi-a-GCST90025987	Inverse variance weighted	192	-0.00182281	0.0116592	0.875765	-0.0246749	0.0210293	0.998179	0.975627	1.02125
ebi-a-GCST90025988	cardiac function	Red cell distribution width || id:ebi-a-GCST90025988	Inverse variance weighted	203	0.0116668	0.0108748	0.283349	-0.00964783	0.0329814	1.01174	0.990399	1.03353
ebi-a-GCST90025989	cardiac function	Insulin-like growth factor 1 levels || id:ebi-a-GCST90025989	Inverse variance weighted	236	0.00723826	0.0116531	0.534503	-0.0156017	0.0300783	1.00726	0.984519	1.03054
ebi-a-GCST90025990	cardiac function	Calcium levels || id:ebi-a-GCST90025990	Inverse variance weighted	125	0.0082987	0.0153017	0.587586	-0.0216927	0.0382901	1.00833	0.978541	1.03903
ebi-a-GCST90025991	cardiac function	Serum urea levels || id:ebi-a-GCST90025991	Inverse variance weighted	123	0.000179154	0.0185063	0.992276	-0.0360932	0.0364515	1.00018	0.96455	1.03712
ebi-a-GCST90025992	cardiac function	Serum albumin levels || id:ebi-a-GCST90025992	Inverse variance weighted	130	-0.0329249	0.0181106	0.0690657	-0.0684218	0.00257189	0.967611	0.933867	1.00258
ebi-a-GCST90025993	cardiac function	Lipoprotein (a) levels || id:ebi-a-GCST90025993	Inverse variance weighted	22	0.00495567	0.0083148	0.551171	-0.0113413	0.0212527	1.00497	0.988723	1.02148
ebi-a-GCST90025994	cardiac function	Body mass index || id:ebi-a-GCST90025994	Inverse variance weighted	237	-0.0219224	0.0149525	0.142612	-0.0512294	0.00738455	0.978316	0.950061	1.00741
ebi-a-GCST90025995	cardiac function	Serum total protein level || id:ebi-a-GCST90025995	Inverse variance weighted	170	-0.0302534	0.0169638	0.0745197	-0.0635024	0.00299564	0.9702	0.938472	1.003
ebi-a-GCST90025996	cardiac function	Waist-to-hip ratio adjusted for BMI || id:ebi-a-GCST90025996	Inverse variance weighted	143	-0.0373021	0.0186283	0.045237	-0.0738136	-0.000790652	0.963385	0.928845	0.99921
ebi-a-GCST90025997	cardiac function	Basophil count || id:ebi-a-GCST90025997	Inverse variance weighted	38	0.0695616	0.0323399	0.0314797	0.0061755	0.132948	1.07204	1.00619	1.14219
ebi-a-GCST90025998	cardiac function	Lung function (FVC) || id:ebi-a-GCST90025998	Inverse variance weighted	180	0.00349353	0.0177184	0.843695	-0.0312345	0.0382216	1.0035	0.969248	1.03896
ebi-a-GCST002783	cardiac function	Body mass index || id:ebi-a-GCST002783	Inverse variance weighted	53	-0.00879283	0.0220496	0.690059	-0.05201	0.0344244	0.991246	0.949319	1.03502
ebi-a-GCST002783	cardiac function	Body mass index || id:ebi-a-GCST002783	Inverse variance weighted	53	-0.00879283	0.0220496	0.690059	-0.05201	0.0344244	0.991246	0.949319	1.03502
eqtl-a-ENSG00000244041	cardiac function	ENSG00000244041 || id:eqtl-a-ENSG00000244041	Inverse variance weighted	4	-0.00144146	0.00728349	0.843117	-0.0157171	0.0128342	0.99856	0.984406	1.01292
eqtl-a-ENSG00000244041	cardiac function	ENSG00000244041 || id:eqtl-a-ENSG00000244041	Inverse variance weighted	4	-0.00144146	0.00728349	0.843117	-0.0157171	0.0128342	0.99856	0.984406	1.01292
eqtl-a-ENSG00000244617	cardiac function	ENSG00000244617 || id:eqtl-a-ENSG00000244617	Inverse variance weighted	5	0.00294583	0.0240361	0.902456	-0.0441649	0.0500565	1.00295	0.956796	1.05133
eqtl-a-ENSG00000244617	cardiac function	ENSG00000244617 || id:eqtl-a-ENSG00000244617	Inverse variance weighted	5	0.00294583	0.0240361	0.902456	-0.0441649	0.0500565	1.00295	0.956796	1.05133
ebi-a-GCST003043	cardiac function	Inflammatory bowel disease || id:ebi-a-GCST003043	Inverse variance weighted	90	-0.00242078	0.00410054	0.554952	-0.0104578	0.00561629	0.997582	0.989597	1.00563
ebi-a-GCST003043	cardiac function	Inflammatory bowel disease || id:ebi-a-GCST003043	Inverse variance weighted	90	-0.00242078	0.00410054	0.554952	-0.0104578	0.00561629	0.997582	0.989597	1.00563
ebi-a-GCST003044	cardiac function	Crohn's disease || id:ebi-a-GCST003044	Inverse variance weighted	82	-0.00291909	0.00335939	0.384884	-0.0095035	0.00366532	0.997085	0.990542	1.00367
ebi-a-GCST003044	cardiac function	Crohn's disease || id:ebi-a-GCST003044	Inverse variance weighted	82	-0.00291909	0.00335939	0.384884	-0.0095035	0.00366532	0.997085	0.990542	1.00367
eqtl-a-ENSG00000249992	cardiac function	ENSG00000249992 || id:eqtl-a-ENSG00000249992	Inverse variance weighted	13	0.000917874	0.00562923	0.870475	-0.0101154	0.0119512	1.00092	0.989936	1.01202
eqtl-a-ENSG00000249992	cardiac function	ENSG00000249992 || id:eqtl-a-ENSG00000249992	Inverse variance weighted	13	0.000917874	0.00562923	0.870475	-0.0101154	0.0119512	1.00092	0.989936	1.01202
eqtl-a-ENSG00000250361	cardiac function	ENSG00000250361 || id:eqtl-a-ENSG00000250361	Inverse variance weighted	4	0.0184641	0.0199976	0.355843	-0.0207312	0.0576594	1.01864	0.979482	1.05935
eqtl-a-ENSG00000250361	cardiac function	ENSG00000250361 || id:eqtl-a-ENSG00000250361	Inverse variance weighted	4	0.0184641	0.0199976	0.355843	-0.0207312	0.0576594	1.01864	0.979482	1.05935
ebi-a-GCST003045	cardiac function	Ulcerative colitis || id:ebi-a-GCST003045	Inverse variance weighted	59	0.00577585	0.00482726	0.231499	-0.00368559	0.0152373	1.00579	0.996321	1.01535
eqtl-a-ENSG00000250510	cardiac function	ENSG00000250510 || id:eqtl-a-ENSG00000250510	Inverse variance weighted	4	-0.0020706	0.0171986	0.904172	-0.0357798	0.0316386	0.997932	0.964853	1.03214
eqtl-a-ENSG00000250510	cardiac function	ENSG00000250510 || id:eqtl-a-ENSG00000250510	Inverse variance weighted	4	-0.0020706	0.0171986	0.904172	-0.0357798	0.0316386	0.997932	0.964853	1.03214
ebi-a-GCST003045	cardiac function	Ulcerative colitis || id:ebi-a-GCST003045	Inverse variance weighted	59	0.00577585	0.00482726	0.231499	-0.00368559	0.0152373	1.00579	0.996321	1.01535
ebi-a-GCST003116	cardiac function	Coronary artery disease || id:ebi-a-GCST003116	Inverse variance weighted	28	-0.00848619	0.00834152	0.30899	-0.0248356	0.00786318	0.99155	0.97547	1.00789
ebi-a-GCST003116	cardiac function	Coronary artery disease || id:ebi-a-GCST003116	Inverse variance weighted	28	-0.00848619	0.00834152	0.30899	-0.0248356	0.00786318	0.99155	0.97547	1.00789
ebi-a-GCST003129	cardiac function	Primary biliary cholangitis || id:ebi-a-GCST003129	Inverse variance weighted	18	0.00170763	0.0043986	0.697852	-0.00691363	0.0103289	1.00171	0.99311	1.01038
ebi-a-GCST90026212	cardiac function	N-acetylglucosamine/n-acetylgalactosamine levels || id:ebi-a-GCST90026212	Inverse variance weighted	4	-0.0045384	0.0122329	0.710638	-0.0285149	0.0194381	0.995472	0.971888	1.01963
eqtl-a-ENSG00000254614	cardiac function	ENSG00000254614 || id:eqtl-a-ENSG00000254614	Inverse variance weighted	5	0.00430861	0.00742407	0.561674	-0.0102426	0.0188598	1.00432	0.98981	1.01904
eqtl-a-ENSG00000254614	cardiac function	ENSG00000254614 || id:eqtl-a-ENSG00000254614	Inverse variance weighted	5	0.00430861	0.00742407	0.561674	-0.0102426	0.0188598	1.00432	0.98981	1.01904
ebi-a-GCST003129	cardiac function	Primary biliary cholangitis || id:ebi-a-GCST003129	Inverse variance weighted	18	0.00170763	0.0043986	0.697852	-0.00691363	0.0103289	1.00171	0.99311	1.01038
ebi-a-GCST003156	cardiac function	Systemic lupus erythematosus || id:ebi-a-GCST003156	Inverse variance weighted	16	9.30136e-05	0.0028848	0.974279	-0.0055612	0.00574723	1.00009	0.994454	1.00576
ebi-a-GCST003156	cardiac function	Systemic lupus erythematosus || id:ebi-a-GCST003156	Inverse variance weighted	16	9.30136e-05	0.0028848	0.974279	-0.0055612	0.00574723	1.00009	0.994454	1.00576
eqtl-a-ENSG00000256060	cardiac function	ENSG00000256060 || id:eqtl-a-ENSG00000256060	Inverse variance weighted	3	-0.00650014	0.00849723	0.444288	-0.0231547	0.0101544	0.993521	0.977111	1.01021
eqtl-a-ENSG00000256060	cardiac function	ENSG00000256060 || id:eqtl-a-ENSG00000256060	Inverse variance weighted	3	-0.00650014	0.00849723	0.444288	-0.0231547	0.0101544	0.993521	0.977111	1.01021
eqtl-a-ENSG00000256862	cardiac function	ENSG00000256862 || id:eqtl-a-ENSG00000256862	Inverse variance weighted	4	-0.00243745	0.00677165	0.718886	-0.0157099	0.010835	0.997566	0.984413	1.01089
eqtl-a-ENSG00000256862	cardiac function	ENSG00000256862 || id:eqtl-a-ENSG00000256862	Inverse variance weighted	4	-0.00243745	0.00677165	0.718886	-0.0157099	0.010835	0.997566	0.984413	1.01089
eqtl-a-ENSG00000257017	cardiac function	ENSG00000257017 || id:eqtl-a-ENSG00000257017	Inverse variance weighted	4	-0.000214928	0.00508422	0.966281	-0.01018	0.00975015	0.999785	0.989872	1.0098
eqtl-a-ENSG00000257017	cardiac function	ENSG00000257017 || id:eqtl-a-ENSG00000257017	Inverse variance weighted	4	-0.000214928	0.00508422	0.966281	-0.01018	0.00975015	0.999785	0.989872	1.0098
bbj-a-123	cardiac function	Graves' disease || id:bbj-a-123	Inverse variance weighted	5	0.00560793	0.0135277	0.67847	-0.0209063	0.0321222	1.00562	0.979311	1.03264
ebi-a-GCST003372	cardiac function	Glomerular filtration rate (creatinine) || id:ebi-a-GCST003372	Inverse variance weighted	31	-0.0170838	0.0915003	0.85189	-0.196424	0.162257	0.983061	0.821663	1.17616
ebi-a-GCST003372	cardiac function	Glomerular filtration rate (creatinine) || id:ebi-a-GCST003372	Inverse variance weighted	31	-0.0170838	0.0915003	0.85189	-0.196424	0.162257	0.983061	0.821663	1.17616
eqtl-a-ENSG00000259207	cardiac function	ENSG00000259207 || id:eqtl-a-ENSG00000259207	Inverse variance weighted	10	0.0088978	0.00545624	0.102941	-0.00179643	0.019592	1.00894	0.998205	1.01979
eqtl-a-ENSG00000259207	cardiac function	ENSG00000259207 || id:eqtl-a-ENSG00000259207	Inverse variance weighted	10	0.0088978	0.00545624	0.102941	-0.00179643	0.019592	1.00894	0.998205	1.01979
ebi-a-GCST90026371	cardiac function	Mitochondrial DNA copy number || id:ebi-a-GCST90026371	Inverse variance weighted	34	-0.00567474	0.0359569	0.874598	-0.0761503	0.0648008	0.994341	0.926677	1.06695
ebi-a-GCST90026372	cardiac function	Mitochondrial DNA copy number || id:ebi-a-GCST90026372	Inverse variance weighted	30	0.0141859	0.0388229	0.714812	-0.061907	0.0902788	1.01429	0.93997	1.09448
ebi-a-GCST90026654	cardiac function	Estimated glomerular filtration rate (creatinine) || id:ebi-a-GCST90026654	Inverse variance weighted	259	0.0291629	0.112318	0.795136	-0.19098	0.249306	1.02959	0.826149	1.28313
ebi-a-GCST90027158	cardiac function	Alzheimer's disease || id:ebi-a-GCST90027158	Inverse variance weighted	22	-0.00967982	0.0109083	0.374872	-0.03106	0.0117004	0.990367	0.969417	1.01177
ebi-a-GCST90027161	cardiac function	Atopic dermatitis || id:ebi-a-GCST90027161	Inverse variance weighted	10	0.0230001	0.0157263	0.143596	-0.00782334	0.0538236	1.02327	0.992207	1.0553
ebi-a-GCST90027163	cardiac function	Amyotrophic lateral sclerosis || id:ebi-a-GCST90027163	Inverse variance weighted	8	-0.0109802	0.0135161	0.416574	-0.0374719	0.0155114	0.98908	0.963222	1.01563
ebi-a-GCST90027164	cardiac function	Amyotrophic lateral sclerosis || id:ebi-a-GCST90027164	Inverse variance weighted	7	-0.00784422	0.0137263	0.567679	-0.0347478	0.0190594	0.992186	0.965849	1.01924
ebi-a-GCST003375	cardiac function	Glomerular filtration rate (cystatin C) || id:ebi-a-GCST003375	Inverse variance weighted	4	-0.00140026	0.0535606	0.979143	-0.106379	0.103578	0.998601	0.899084	1.10913
ebi-a-GCST003375	cardiac function	Glomerular filtration rate (cystatin C) || id:ebi-a-GCST003375	Inverse variance weighted	4	-0.00140026	0.0535606	0.979143	-0.106379	0.103578	0.998601	0.899084	1.10913
eqtl-a-ENSG00000260943	cardiac function	ENSG00000260943 || id:eqtl-a-ENSG00000260943	Inverse variance weighted	4	-0.0114543	0.00766565	0.135112	-0.026479	0.00357032	0.988611	0.973868	1.00358
eqtl-a-ENSG00000260943	cardiac function	ENSG00000260943 || id:eqtl-a-ENSG00000260943	Inverse variance weighted	4	-0.0114543	0.00766565	0.135112	-0.026479	0.00357032	0.988611	0.973868	1.00358
ebi-a-GCST90028992	cardiac function	White blood cell count (eosinophil) || id:ebi-a-GCST90028992	Inverse variance weighted	221	-0.00485069	0.0107693	0.652409	-0.0259585	0.0162571	0.995161	0.974375	1.01639
ebi-a-GCST90028993	cardiac function	High light scatter reticulocyte count || id:ebi-a-GCST90028993	Inverse variance weighted	220	0.000994558	0.0131587	0.939752	-0.0247966	0.0267857	1.001	0.975508	1.02715
ebi-a-GCST90028994	cardiac function	White blood cell count (lymphocyte) || id:ebi-a-GCST90028994	Inverse variance weighted	231	-0.000673677	0.0140206	0.961677	-0.0281541	0.0268068	0.999327	0.972239	1.02717
ebi-a-GCST90028995	cardiac function	Mean corpuscular hemoglobin || id:ebi-a-GCST90028995	Inverse variance weighted	221	0.0162392	0.00987131	0.0999511	-0.00310857	0.035587	1.01637	0.996896	1.03623
ebi-a-GCST90028996	cardiac function	Mean platelet volume || id:ebi-a-GCST90028996	Inverse variance weighted	310	-0.00982065	0.00718092	0.171436	-0.0238952	0.00425394	0.990227	0.976388	1.00426
ebi-a-GCST90028997	cardiac function	Mean sphered cell volume || id:ebi-a-GCST90028997	Inverse variance weighted	224	0.0116588	0.0103268	0.258902	-0.00858164	0.0318993	1.01173	0.991455	1.03241
ebi-a-GCST90028998	cardiac function	White blood cell count (monocyte) || id:ebi-a-GCST90028998	Inverse variance weighted	220	0.00442662	0.00966382	0.646908	-0.0145145	0.0233677	1.00444	0.98559	1.02364
ebi-a-GCST90028999	cardiac function	Platelet count || id:ebi-a-GCST90028999	Inverse variance weighted	311	0.00758122	0.00876748	0.387205	-0.00960304	0.0247655	1.00761	0.990443	1.02507
ebi-a-GCST90029000	cardiac function	Platelet distribution width || id:ebi-a-GCST90029000	Inverse variance weighted	217	-0.00985948	0.0107903	0.360856	-0.0310085	0.0112895	0.990189	0.969467	1.01135
ebi-a-GCST90029001	cardiac function	Red cell distribution width || id:ebi-a-GCST90029001	Inverse variance weighted	208	0.0096307	0.0109864	0.380703	-0.0119027	0.0311641	1.00968	0.988168	1.03165
ebi-a-GCST90029002	cardiac function	Red blood cell count || id:ebi-a-GCST90029002	Inverse variance weighted	239	-0.0192496	0.0110432	0.0813125	-0.0408942	0.00239503	0.980935	0.959931	1.0024
ebi-a-GCST90029003	cardiac function	White blood cell count || id:ebi-a-GCST90029003	Inverse variance weighted	222	-0.00120523	0.0135601	0.929177	-0.0277831	0.0253727	0.998796	0.972599	1.0257
ebi-a-GCST90029004	cardiac function	Heel bone mineral density || id:ebi-a-GCST90029004	Inverse variance weighted	345	0.00677851	0.00893539	0.448084	-0.0107349	0.0242919	1.0068	0.989323	1.02459
ebi-a-GCST90029005	cardiac function	Balding type 1 || id:ebi-a-GCST90029005	Inverse variance weighted	135	-0.0732798	0.0253471	0.00383959	-0.12296	-0.0235994	0.929341	0.884299	0.976677
ebi-a-GCST90029006	cardiac function	Balding type 4 || id:ebi-a-GCST90029006	Inverse variance weighted	124	0.0710459	0.0316451	0.0247627	0.00902154	0.13307	1.07363	1.00906	1.14233
ebi-a-GCST90029007	cardiac function	Body mass index || id:ebi-a-GCST90029007	Inverse variance weighted	271	-0.0260409	0.0145732	0.0739534	-0.0546044	0.0025226	0.974295	0.94686	1.00253
ebi-a-GCST90029008	cardiac function	Height || id:ebi-a-GCST90029008	Inverse variance weighted	463	-0.0282022	0.00916269	0.00208441	-0.046161	-0.0102433	0.972192	0.954888	0.989809
ebi-a-GCST90029009	cardiac function	Waist-hip ratio || id:ebi-a-GCST90029009	Inverse variance weighted	181	-0.0304805	0.0168139	0.0698591	-0.0634357	0.00247461	0.969979	0.938534	1.00248
ebi-a-GCST90029010	cardiac function	Diastolic blood pressure || id:ebi-a-GCST90029010	Inverse variance weighted	214	-0.0703524	0.0168749	3.0586e-05	-0.103427	-0.0372776	0.932065	0.901742	0.963409
ebi-a-GCST90029011	cardiac function	Systolic blood pressure || id:ebi-a-GCST90029011	Inverse variance weighted	231	-0.0102914	0.0162665	0.526945	-0.0421739	0.021591	0.989761	0.958703	1.02183
ebi-a-GCST90029012	cardiac function	Educational attainment (college completion) || id:ebi-a-GCST90029012	Inverse variance weighted	116	0.103304	0.0547819	0.0593308	-0.00406841	0.210677	1.10883	0.99594	1.23451
ebi-a-GCST90029013	cardiac function	Educational attainment (years of education) || id:ebi-a-GCST90029013	Inverse variance weighted	129	0.000494459	0.00488171	0.919322	-0.0090737	0.0100626	1.00049	0.990967	1.01011
ebi-a-GCST90029014	cardiac function	Smoking status || id:ebi-a-GCST90029014	Inverse variance weighted	72	-0.0499722	0.0461546	0.278935	-0.140435	0.0404908	0.951256	0.86898	1.04132
ebi-a-GCST90029015	cardiac function	Autoimmune traits || id:ebi-a-GCST90029015	Inverse variance weighted	35	-0.10395	0.102965	0.312701	-0.305761	0.0978605	0.90127	0.736563	1.10281
ebi-a-GCST90029016	cardiac function	Autoimmune traits || id:ebi-a-GCST90029016	Inverse variance weighted	7	-0.148162	0.633528	0.815087	-1.38988	1.09355	0.862291	0.249106	2.98486
ebi-a-GCST90029017	cardiac function	Eczema || id:ebi-a-GCST90029017	Inverse variance weighted	77	0.0298875	0.0595518	0.615757	-0.0868341	0.146609	1.03034	0.916829	1.1579
ebi-a-GCST90029018	cardiac function	Asthma || id:ebi-a-GCST90029018	Inverse variance weighted	50	-0.119616	0.0920214	0.193644	-0.299978	0.0607456	0.887261	0.740834	1.06263
ebi-a-GCST90029019	cardiac function	Cardiovascular disease || id:ebi-a-GCST90029019	Inverse variance weighted	129	-0.122474	0.0514841	0.0173655	-0.223383	-0.0215655	0.884729	0.799808	0.978665
bbj-a-123	cardiac function	Graves' disease || id:bbj-a-123	Inverse variance weighted	5	0.00560793	0.0135277	0.67847	-0.0209063	0.0321222	1.00562	0.979311	1.03264
ebi-a-GCST003401	cardiac function	Glomerular filtration rate in non diabetics (creatinine) || id:ebi-a-GCST003401	Inverse variance weighted	32	-0.0439087	0.103381	0.671035	-0.246535	0.158718	0.957041	0.781504	1.17201
ebi-a-GCST90029021	cardiac function	High cholesterol || id:ebi-a-GCST90029021	Inverse variance weighted	48	-0.0375844	0.0660002	0.569045	-0.166945	0.091776	0.963113	0.846246	1.09612
ebi-a-GCST90029022	cardiac function	Hypothyroidism || id:ebi-a-GCST90029022	Inverse variance weighted	63	-0.209542	0.136458	0.124641	-0.476999	0.0579152	0.810956	0.620643	1.05963
ebi-a-GCST90029023	cardiac function	Respiratory or ear-nose-throat disease || id:ebi-a-GCST90029023	Inverse variance weighted	41	-0.0488166	0.0900881	0.587904	-0.225389	0.127756	0.952356	0.798206	1.13628
ebi-a-GCST90029024	cardiac function	Type 2 diabetes || id:ebi-a-GCST90029024	Inverse variance weighted	44	-0.226572	0.156357	0.147318	-0.533031	0.0798872	0.797262	0.586824	1.08316
ebi-a-GCST90029025	cardiac function	Basal metabolic rate || id:ebi-a-GCST90029025	Inverse variance weighted	338	-0.0521722	0.0199351	0.00886796	-0.0912449	-0.0130994	0.949165	0.912794	0.986986
ebi-a-GCST90029026	cardiac function	Lung function (FEV1/FVC) || id:ebi-a-GCST90029026	Inverse variance weighted	255	0.00643601	0.0132754	0.627813	-0.0195838	0.0324558	1.00646	0.980607	1.03299
ebi-a-GCST90029027	cardiac function	Lung function (FVC) || id:ebi-a-GCST90029027	Inverse variance weighted	198	-0.0104298	0.0171705	0.54357	-0.0440839	0.0232244	0.989624	0.956874	1.0235
ebi-a-GCST90029028	cardiac function	Neuroticism || id:ebi-a-GCST90029028	Inverse variance weighted	72	0.00162019	0.00861556	0.850835	-0.0152663	0.0185067	1.00162	0.98485	1.01868
ebi-a-GCST90029029	cardiac function	Morning person || id:ebi-a-GCST90029029	Inverse variance weighted	70	-0.0292371	0.0615894	0.634994	-0.149952	0.0914782	0.971186	0.860749	1.09579
ebi-a-GCST90029030	cardiac function	Hair color || id:ebi-a-GCST90029030	Inverse variance weighted	139	-0.0171086	0.0122564	0.162746	-0.0411312	0.0069139	0.983037	0.959703	1.00694
eqtl-a-ENSG00000263417	cardiac function	ENSG00000263417 || id:eqtl-a-ENSG00000263417	Inverse variance weighted	5	0.00612131	0.00815403	0.452827	-0.00986059	0.0221032	1.00614	0.990188	1.02235
eqtl-a-ENSG00000263417	cardiac function	ENSG00000263417 || id:eqtl-a-ENSG00000263417	Inverse variance weighted	5	0.00612131	0.00815403	0.452827	-0.00986059	0.0221032	1.00614	0.990188	1.02235
ebi-a-GCST003401	cardiac function	Glomerular filtration rate in non diabetics (creatinine) || id:ebi-a-GCST003401	Inverse variance weighted	32	-0.0439087	0.103381	0.671035	-0.246535	0.158718	0.957041	0.781504	1.17201
ebi-a-GCST90029031	cardiac function	Hair color (blond) || id:ebi-a-GCST90029031	Inverse variance weighted	106	-0.0385136	0.0428601	0.368872	-0.122519	0.0454923	0.962219	0.884689	1.04654
ebi-a-GCST90029032	cardiac function	Hair color (dark brown) || id:ebi-a-GCST90029032	Inverse variance weighted	88	0.0476024	0.0316051	0.132026	-0.0143436	0.109548	1.04875	0.985759	1.11577
ebi-a-GCST90029033	cardiac function	Skin pigmentation || id:ebi-a-GCST90029033	Inverse variance weighted	67	-0.0528616	0.0359404	0.141342	-0.123305	0.0175816	0.948511	0.883994	1.01774
ebi-a-GCST90029034	cardiac function	Sunburns || id:ebi-a-GCST90029034	Inverse variance weighted	21	-0.053184	0.0501337	0.288762	-0.151446	0.0450781	0.948206	0.859464	1.04611
ebi-a-GCST90029035	cardiac function	Tanning || id:ebi-a-GCST90029035	Inverse variance weighted	43	0.0485007	0.0295489	0.10072	-0.00941502	0.106417	1.0497	0.990629	1.11229
ebi-a-GCST90029036	cardiac function	Menarche (age at onset) || id:ebi-a-GCST90029036	Inverse variance weighted	141	0.00799746	0.00910573	0.379787	-0.00984978	0.0258447	1.00803	0.990199	1.02618
ebi-a-GCST90029037	cardiac function	Menopause (age at onset) || id:ebi-a-GCST90029037	Inverse variance weighted	45	0.00121383	0.00301367	0.687115	-0.00469297	0.00712063	1.00121	0.995318	1.00715
ebi-a-GCST90029038	cardiac function	Number of children ever born || id:ebi-a-GCST90029038	Inverse variance weighted	7	0.236976	0.0997433	0.0175083	0.0414789	0.432473	1.26741	1.04235	1.54106
ebi-a-GCST90029070	cardiac function	C-reactive protein levels || id:ebi-a-GCST90029070	Inverse variance weighted	108	-0.00979487	0.0114914	0.394013	-0.0323181	0.0127284	0.990253	0.968199	1.01281
ebi-a-GCST90029073	cardiac function	Liver fat || id:ebi-a-GCST90029073	Inverse variance weighted	4	0.00856157	0.0244723	0.726453	-0.0394041	0.0565272	1.0086	0.961362	1.05816
ebi-a-GCST003435	cardiac function	Body fat percentage || id:ebi-a-GCST003435	Inverse variance weighted	7	-0.00340038	0.0629601	0.956928	-0.126802	0.120001	0.996605	0.880908	1.1275
ebi-a-GCST003435	cardiac function	Body fat percentage || id:ebi-a-GCST003435	Inverse variance weighted	7	-0.00340038	0.0629601	0.956928	-0.126802	0.120001	0.996605	0.880908	1.1275
ebi-a-GCST003484	cardiac function	Periodontal disease-related phenotype (Socransky) || id:ebi-a-GCST003484	Inverse variance weighted	3	0.00104891	0.00318253	0.741714	-0.00518884	0.00728667	1.00105	0.994825	1.00731
ebi-a-GCST003484	cardiac function	Periodontal disease-related phenotype (Socransky) || id:ebi-a-GCST003484	Inverse variance weighted	3	0.00104891	0.00318253	0.741714	-0.00518884	0.00728667	1.00105	0.994825	1.00731
ebi-a-GCST003566	cardiac function	Multiple sclerosis || id:ebi-a-GCST003566	Inverse variance weighted	10	0.00197355	0.00697083	0.777088	-0.0116893	0.0156364	1.00198	0.988379	1.01576
ebi-a-GCST003566	cardiac function	Multiple sclerosis || id:ebi-a-GCST003566	Inverse variance weighted	10	0.00197355	0.00697083	0.777088	-0.0116893	0.0156364	1.00198	0.988379	1.01576
eqtl-a-ENSG00000268119	cardiac function	ENSG00000268119 || id:eqtl-a-ENSG00000268119	Inverse variance weighted	4	-0.00362577	0.00741434	0.624826	-0.0181579	0.0109063	0.996381	0.982006	1.01097
eqtl-a-ENSG00000268119	cardiac function	ENSG00000268119 || id:eqtl-a-ENSG00000268119	Inverse variance weighted	4	-0.00362577	0.00741434	0.624826	-0.0181579	0.0109063	0.996381	0.982006	1.01097
finn-b-ABDOM_HERNIA	cardiac function	Hernia of abodminal wall || id:finn-b-ABDOM_HERNIA	Inverse variance weighted	4	-0.00678523	0.0182003	0.709291	-0.0424579	0.0288874	0.993238	0.958431	1.02931
finn-b-ABDOM_HERNIA	cardiac function	Hernia of abodminal wall || id:finn-b-ABDOM_HERNIA	Inverse variance weighted	4	-0.00678523	0.0182003	0.709291	-0.0424579	0.0288874	0.993238	0.958431	1.02931
ebi-a-GCST003724	cardiac function	Bipolar disorder || id:ebi-a-GCST003724	Inverse variance weighted	4	0.0202021	0.013831	0.144114	-0.00690662	0.0473108	1.02041	0.993117	1.04845
finn-b-ASTHMA_ACUTE_RESPIRATORY_INFECTIONS	cardiac function	Asthma-related acute respiratory infections || id:finn-b-ASTHMA_ACUTE_RESPIRATORY_INFECTIONS	Inverse variance weighted	4	-0.0142204	0.0247534	0.565641	-0.062737	0.0342962	0.98588	0.93919	1.03489
finn-b-ASTHMA_ACUTE_RESPIRATORY_INFECTIONS	cardiac function	Asthma-related acute respiratory infections || id:finn-b-ASTHMA_ACUTE_RESPIRATORY_INFECTIONS	Inverse variance weighted	4	-0.0142204	0.0247534	0.565641	-0.062737	0.0342962	0.98588	0.93919	1.03489
finn-b-ASTHMA_EOSINOPHIL_SUGG	cardiac function	Suggestive for eosinophilic asthma || id:finn-b-ASTHMA_EOSINOPHIL_SUGG	Inverse variance weighted	4	-0.00892584	0.00857451	0.297887	-0.0257319	0.00788019	0.991114	0.974596	1.00791
finn-b-ASTHMA_EOSINOPHIL_SUGG	cardiac function	Suggestive for eosinophilic asthma || id:finn-b-ASTHMA_EOSINOPHIL_SUGG	Inverse variance weighted	4	-0.00892584	0.00857451	0.297887	-0.0257319	0.00788019	0.991114	0.974596	1.00791
finn-b-ASTHMA_HOSPITAL_MAIN	cardiac function	Asthma, hospital admissions , main diagnosis only || id:finn-b-ASTHMA_HOSPITAL_MAIN	Inverse variance weighted	8	-0.0184986	0.0165165	0.26271	-0.0508709	0.0138737	0.981671	0.950401	1.01397
finn-b-ASTHMA_HOSPITAL_MAIN	cardiac function	Asthma, hospital admissions , main diagnosis only || id:finn-b-ASTHMA_HOSPITAL_MAIN	Inverse variance weighted	8	-0.0184986	0.0165165	0.26271	-0.0508709	0.0138737	0.981671	0.950401	1.01397
finn-b-ASTHMA_INFECTIONS	cardiac function	Asthma-related infections || id:finn-b-ASTHMA_INFECTIONS	Inverse variance weighted	6	-0.0140552	0.0145093	0.332694	-0.0424935	0.0143831	0.986043	0.958397	1.01449
finn-b-ASTHMA_INFECTIONS	cardiac function	Asthma-related infections || id:finn-b-ASTHMA_INFECTIONS	Inverse variance weighted	6	-0.0140552	0.0145093	0.332694	-0.0424935	0.0143831	0.986043	0.958397	1.01449
finn-b-ASTHMA_MODE	cardiac function	Asthma (mode) || id:finn-b-ASTHMA_MODE	Inverse variance weighted	8	-0.0131195	0.0132099	0.320635	-0.039011	0.012772	0.986966	0.96174	1.01285
finn-b-ASTHMA_MODE	cardiac function	Asthma (mode) || id:finn-b-ASTHMA_MODE	Inverse variance weighted	8	-0.0131195	0.0132099	0.320635	-0.039011	0.012772	0.986966	0.96174	1.01285
finn-b-ASTHMA_NAS	cardiac function	Asthma, unspecified (mode) || id:finn-b-ASTHMA_NAS	Inverse variance weighted	4	-0.054812	0.0320833	0.0875569	-0.117695	0.00807125	0.946663	0.888967	1.0081
finn-b-ASTHMA_NAS	cardiac function	Asthma, unspecified (mode) || id:finn-b-ASTHMA_NAS	Inverse variance weighted	4	-0.054812	0.0320833	0.0875569	-0.117695	0.00807125	0.946663	0.888967	1.0081
finn-b-ASTHMA_NAS_EXMORE	cardiac function	""""""""Asthma, unspecified (mode)"""""""" (more controls excluded) || id:finn-b-ASTHMA_NAS_EXMORE	Inverse variance weighted	5	-0.0558378	0.0244978	0.0226495	-0.103854	-0.00782207	0.945692	0.901357	0.992208
finn-b-ASTHMA_NAS_EXMORE	cardiac function	""""""""Asthma, unspecified (mode)"""""""" (more controls excluded) || id:finn-b-ASTHMA_NAS_EXMORE	Inverse variance weighted	5	-0.0558378	0.0244978	0.0226495	-0.103854	-0.00782207	0.945692	0.901357	0.992208
finn-b-ATOPIC_STRICT	cardiac function	Atopic dermatitis, strict definition || id:finn-b-ATOPIC_STRICT	Inverse variance weighted	4	0.0112909	0.0145969	0.439219	-0.017319	0.0399008	1.01135	0.98283	1.04071
finn-b-ATOPIC_STRICT	cardiac function	Atopic dermatitis, strict definition || id:finn-b-ATOPIC_STRICT	Inverse variance weighted	4	0.0112909	0.0145969	0.439219	-0.017319	0.0399008	1.01135	0.98283	1.04071
finn-b-ATOPIC_STRICT_REIMB	cardiac function	Atopic dermatitis, strict definition with reimbursement || id:finn-b-ATOPIC_STRICT_REIMB	Inverse variance weighted	6	0.0105584	0.00952302	0.267548	-0.00810669	0.0292236	1.01061	0.991926	1.02965
finn-b-ATOPIC_STRICT_REIMB	cardiac function	Atopic dermatitis, strict definition with reimbursement || id:finn-b-ATOPIC_STRICT_REIMB	Inverse variance weighted	6	0.0105584	0.00952302	0.267548	-0.00810669	0.0292236	1.01061	0.991926	1.02965
finn-b-AUTOIMMUNE	cardiac function	Autoimmune diseases || id:finn-b-AUTOIMMUNE	Inverse variance weighted	20	-0.00622178	0.00990983	0.530109	-0.0256451	0.0132015	0.993798	0.974681	1.01329
finn-b-AUTOIMMUNE	cardiac function	Autoimmune diseases || id:finn-b-AUTOIMMUNE	Inverse variance weighted	20	-0.00622178	0.00990983	0.530109	-0.0256451	0.0132015	0.993798	0.974681	1.01329
finn-b-C3_BREAST	cardiac function	Malignant neoplasm of breast || id:finn-b-C3_BREAST	Inverse variance weighted	13	0.00439979	0.00719299	0.540751	-0.00969847	0.0184981	1.00441	0.990348	1.01867
finn-b-C3_BREAST	cardiac function	Malignant neoplasm of breast || id:finn-b-C3_BREAST	Inverse variance weighted	13	0.00439979	0.00719299	0.540751	-0.00969847	0.0184981	1.00441	0.990348	1.01867
finn-b-C3_BREAST_EXALLC	cardiac function	Malignant neoplasm of breast (all cancers excluded) || id:finn-b-C3_BREAST_EXALLC	Inverse variance weighted	13	0.00447376	0.00718035	0.533248	-0.00959973	0.0185473	1.00448	0.990446	1.01872
finn-b-C3_BREAST_EXALLC	cardiac function	Malignant neoplasm of breast (all cancers excluded) || id:finn-b-C3_BREAST_EXALLC	Inverse variance weighted	13	0.00447376	0.00718035	0.533248	-0.00959973	0.0185473	1.00448	0.990446	1.01872
finn-b-C3_BREAST_HER2NEG	cardiac function	Malignant neoplasm of breast, HER2-negative || id:finn-b-C3_BREAST_HER2NEG	Inverse variance weighted	11	0.00431179	0.00770808	0.575898	-0.010796	0.0194196	1.00432	0.989262	1.01961
finn-b-C3_BREAST_HER2NEG	cardiac function	Malignant neoplasm of breast, HER2-negative || id:finn-b-C3_BREAST_HER2NEG	Inverse variance weighted	11	0.00431179	0.00770808	0.575898	-0.010796	0.0194196	1.00432	0.989262	1.01961
finn-b-C3_BREAST_HER2NEG_EXALLC	cardiac function	""""""""Malignant neoplasm of breast, HER2-negative"""""""" (all cancers excluded) || id:finn-b-C3_BREAST_HER2NEG_EXALLC	Inverse variance weighted	12	0.00305344	0.00723035	0.6728	-0.011118	0.0172249	1.00306	0.988944	1.01737
finn-b-C3_BREAST_HER2NEG_EXALLC	cardiac function	""""""""Malignant neoplasm of breast, HER2-negative"""""""" (all cancers excluded) || id:finn-b-C3_BREAST_HER2NEG_EXALLC	Inverse variance weighted	12	0.00305344	0.00723035	0.6728	-0.011118	0.0172249	1.00306	0.988944	1.01737
finn-b-C3_BREAST_HERNEG	cardiac function	Malignant neoplasm of breast, HER-negative || id:finn-b-C3_BREAST_HERNEG	Inverse variance weighted	4	0.00473714	0.010366	0.647679	-0.0155802	0.0250545	1.00475	0.984541	1.02537
finn-b-C3_BREAST_HERNEG	cardiac function	Malignant neoplasm of breast, HER-negative || id:finn-b-C3_BREAST_HERNEG	Inverse variance weighted	4	0.00473714	0.010366	0.647679	-0.0155802	0.0250545	1.00475	0.984541	1.02537
finn-b-C3_BREAST_HERNEG_EXALLC	cardiac function	""""""""Malignant neoplasm of breast, HER-negative"""""""" (all cancers excluded) || id:finn-b-C3_BREAST_HERNEG_EXALLC	Inverse variance weighted	4	-0.00173554	0.0104585	0.8682	-0.0222342	0.0187631	0.998266	0.978011	1.01894
finn-b-C3_BREAST_HERNEG_EXALLC	cardiac function	""""""""Malignant neoplasm of breast, HER-negative"""""""" (all cancers excluded) || id:finn-b-C3_BREAST_HERNEG_EXALLC	Inverse variance weighted	4	-0.00173554	0.0104585	0.8682	-0.0222342	0.0187631	0.998266	0.978011	1.01894
finn-b-C3_BREAST_HERPLUS	cardiac function	Malignant neoplasm of breast, HER-positive || id:finn-b-C3_BREAST_HERPLUS	Inverse variance weighted	6	-0.000488267	0.00778914	0.950017	-0.015755	0.0147784	0.999512	0.984368	1.01489
finn-b-C3_BREAST_HERPLUS	cardiac function	Malignant neoplasm of breast, HER-positive || id:finn-b-C3_BREAST_HERPLUS	Inverse variance weighted	6	-0.000488267	0.00778914	0.950017	-0.015755	0.0147784	0.999512	0.984368	1.01489
finn-b-C3_BREAST_HERPLUS_EXALLC	cardiac function	""""""""Malignant neoplasm of breast, HER-positive"""""""" (all cancers excluded) || id:finn-b-C3_BREAST_HERPLUS_EXALLC	Inverse variance weighted	6	-0.00061418	0.00751318	0.934848	-0.01534	0.0141117	0.999386	0.984777	1.01421
finn-b-C3_BREAST_HERPLUS_EXALLC	cardiac function	""""""""Malignant neoplasm of breast, HER-positive"""""""" (all cancers excluded) || id:finn-b-C3_BREAST_HERPLUS_EXALLC	Inverse variance weighted	6	-0.00061418	0.00751318	0.934848	-0.01534	0.0141117	0.999386	0.984777	1.01421
ebi-a-GCST003724	cardiac function	Bipolar disorder || id:ebi-a-GCST003724	Inverse variance weighted	4	0.0202021	0.013831	0.144114	-0.00690662	0.0473108	1.02041	0.993117	1.04845
finn-b-C3_MALE_GENITAL	cardiac function	malignant neoplasm of male genital organs || id:finn-b-C3_MALE_GENITAL	Inverse variance weighted	8	0.000648529	0.0086057	0.939928	-0.0162186	0.0175157	1.00065	0.983912	1.01767
finn-b-C3_MALE_GENITAL	cardiac function	malignant neoplasm of male genital organs || id:finn-b-C3_MALE_GENITAL	Inverse variance weighted	8	0.000648529	0.0086057	0.939928	-0.0162186	0.0175157	1.00065	0.983912	1.01767
finn-b-C3_MALE_GENITAL_EXALLC	cardiac function	malignant neoplasm of male genital organs (all cancers excluded) || id:finn-b-C3_MALE_GENITAL_EXALLC	Inverse variance weighted	7	-0.00426836	0.00911864	0.639719	-0.0221409	0.0136042	0.995741	0.978102	1.0137
finn-b-C3_MALE_GENITAL_EXALLC	cardiac function	malignant neoplasm of male genital organs (all cancers excluded) || id:finn-b-C3_MALE_GENITAL_EXALLC	Inverse variance weighted	7	-0.00426836	0.00911864	0.639719	-0.0221409	0.0136042	0.995741	0.978102	1.0137
finn-b-C3_OTHER_SKIN	cardiac function	Other malignant neoplasms of skin (=non-melanoma skin cancer) || id:finn-b-C3_OTHER_SKIN	Inverse variance weighted	11	-0.00467601	0.00872594	0.592045	-0.0217789	0.0124268	0.995335	0.978457	1.0125
finn-b-C3_OTHER_SKIN	cardiac function	Other malignant neoplasms of skin (=non-melanoma skin cancer) || id:finn-b-C3_OTHER_SKIN	Inverse variance weighted	11	-0.00467601	0.00872594	0.592045	-0.0217789	0.0124268	0.995335	0.978457	1.0125
finn-b-C3_OTHER_SKIN_EXALLC	cardiac function	Other malignant neoplasms of skin (=non-melanoma skin cancer) (all cancers excluded) || id:finn-b-C3_OTHER_SKIN_EXALLC	Inverse variance weighted	8	-0.000600427	0.0124294	0.961472	-0.0249621	0.0237612	0.9994	0.975347	1.02405
finn-b-C3_OTHER_SKIN_EXALLC	cardiac function	Other malignant neoplasms of skin (=non-melanoma skin cancer) (all cancers excluded) || id:finn-b-C3_OTHER_SKIN_EXALLC	Inverse variance weighted	8	-0.000600427	0.0124294	0.961472	-0.0249621	0.0237612	0.9994	0.975347	1.02405
finn-b-C3_PROSTATE	cardiac function	Malignant neoplasm of prostate || id:finn-b-C3_PROSTATE	Inverse variance weighted	9	-0.000620883	0.00764573	0.935278	-0.0156065	0.0143648	0.999379	0.984515	1.01447
finn-b-C3_PROSTATE	cardiac function	Malignant neoplasm of prostate || id:finn-b-C3_PROSTATE	Inverse variance weighted	9	-0.000620883	0.00764573	0.935278	-0.0156065	0.0143648	0.999379	0.984515	1.01447
finn-b-C3_PROSTATE_EXALLC	cardiac function	Malignant neoplasm of prostate (all cancers excluded) || id:finn-b-C3_PROSTATE_EXALLC	Inverse variance weighted	9	-0.000984666	0.00747824	0.895245	-0.015642	0.0136727	0.999016	0.98448	1.01377
finn-b-C3_PROSTATE_EXALLC	cardiac function	Malignant neoplasm of prostate (all cancers excluded) || id:finn-b-C3_PROSTATE_EXALLC	Inverse variance weighted	9	-0.000984666	0.00747824	0.895245	-0.015642	0.0136727	0.999016	0.98448	1.01377
finn-b-C3_SKIN	cardiac function	Malignant neoplasm of skin || id:finn-b-C3_SKIN	Inverse variance weighted	11	-0.0046495	0.00873845	0.594675	-0.0217769	0.0124779	0.995361	0.978459	1.01256
finn-b-C3_SKIN	cardiac function	Malignant neoplasm of skin || id:finn-b-C3_SKIN	Inverse variance weighted	11	-0.0046495	0.00873845	0.594675	-0.0217769	0.0124779	0.995361	0.978459	1.01256
finn-b-C3_SKIN_EXALLC	cardiac function	Malignant neoplasm of skin (all cancers excluded) || id:finn-b-C3_SKIN_EXALLC	Inverse variance weighted	8	-0.000862692	0.0125023	0.944988	-0.0253673	0.0236419	0.999138	0.974952	1.02392
finn-b-C3_SKIN_EXALLC	cardiac function	Malignant neoplasm of skin (all cancers excluded) || id:finn-b-C3_SKIN_EXALLC	Inverse variance weighted	8	-0.000862692	0.0125023	0.944988	-0.0253673	0.0236419	0.999138	0.974952	1.02392
finn-b-CARDIAC_ARRHYTM	cardiac function	Cardiac arrhytmias || id:finn-b-CARDIAC_ARRHYTM	Inverse variance weighted	11	0.00371354	0.0248979	0.881435	-0.0450863	0.0525133	1.00372	0.955915	1.05392
finn-b-CARDIAC_ARRHYTM	cardiac function	Cardiac arrhytmias || id:finn-b-CARDIAC_ARRHYTM	Inverse variance weighted	11	0.00371354	0.0248979	0.881435	-0.0450863	0.0525133	1.00372	0.955915	1.05392
finn-b-CD2_BENIGN	cardiac function	Benign neoplasms || id:finn-b-CD2_BENIGN	Inverse variance weighted	7	0.017582	0.0252189	0.485693	-0.031847	0.067011	1.01774	0.968655	1.06931
finn-b-CD2_BENIGN	cardiac function	Benign neoplasms || id:finn-b-CD2_BENIGN	Inverse variance weighted	7	0.017582	0.0252189	0.485693	-0.031847	0.067011	1.01774	0.968655	1.06931
finn-b-CD2_BENIGN_EXALLC	cardiac function	Benign neoplasms (all cancers excluded) || id:finn-b-CD2_BENIGN_EXALLC	Inverse variance weighted	4	0.00359513	0.0295355	0.903119	-0.0542945	0.0614848	1.0036	0.947153	1.06341
finn-b-CD2_BENIGN_EXALLC	cardiac function	Benign neoplasms (all cancers excluded) || id:finn-b-CD2_BENIGN_EXALLC	Inverse variance weighted	4	0.00359513	0.0295355	0.903119	-0.0542945	0.0614848	1.0036	0.947153	1.06341
finn-b-CD2_BENIGN_LEIOMYOMA_UTERI	cardiac function	Leiomyoma of uterus || id:finn-b-CD2_BENIGN_LEIOMYOMA_UTERI	Inverse variance weighted	14	0.00138753	0.0131982	0.916272	-0.0244809	0.0272559	1.00139	0.975816	1.02763
finn-b-CD2_BENIGN_LEIOMYOMA_UTERI	cardiac function	Leiomyoma of uterus || id:finn-b-CD2_BENIGN_LEIOMYOMA_UTERI	Inverse variance weighted	14	0.00138753	0.0131982	0.916272	-0.0244809	0.0272559	1.00139	0.975816	1.02763
finn-b-CD2_BENIGN_LEIOMYOMA_UTERI_EXALLC	cardiac function	Leiomyoma of uterus (all cancers excluded) || id:finn-b-CD2_BENIGN_LEIOMYOMA_UTERI_EXALLC	Inverse variance weighted	9	0.00367494	0.0131555	0.77998	-0.0221099	0.0294597	1.00368	0.978133	1.0299
finn-b-CD2_BENIGN_LEIOMYOMA_UTERI_EXALLC	cardiac function	Leiomyoma of uterus (all cancers excluded) || id:finn-b-CD2_BENIGN_LEIOMYOMA_UTERI_EXALLC	Inverse variance weighted	9	0.00367494	0.0131555	0.77998	-0.0221099	0.0294597	1.00368	0.978133	1.0299
finn-b-CHOLELITH_BROAD	cardiac function	Cholelithiasis, broad definition with cholecystitis || id:finn-b-CHOLELITH_BROAD	Inverse variance weighted	19	-0.003111	0.00620945	0.616364	-0.0152815	0.00905952	0.996894	0.984835	1.0091
finn-b-CHOLELITH_BROAD	cardiac function	Cholelithiasis, broad definition with cholecystitis || id:finn-b-CHOLELITH_BROAD	Inverse variance weighted	19	-0.003111	0.00620945	0.616364	-0.0152815	0.00905952	0.996894	0.984835	1.0091
finn-b-COX_ARTHROSIS	cardiac function	Coxarthrosis [arthrosis of hip](FG) || id:finn-b-COX_ARTHROSIS	Inverse variance weighted	5	0.0303379	0.0171536	0.0769611	-0.00328325	0.063959	1.0308	0.996722	1.06605
finn-b-COX_ARTHROSIS	cardiac function	Coxarthrosis [arthrosis of hip](FG) || id:finn-b-COX_ARTHROSIS	Inverse variance weighted	5	0.0303379	0.0171536	0.0769611	-0.00328325	0.063959	1.0308	0.996722	1.06605
finn-b-DIABETES_FG	cardiac function	Diabetes, varying definitions || id:finn-b-DIABETES_FG	Inverse variance weighted	29	-0.00945334	0.00874261	0.279566	-0.0265889	0.00768218	0.990591	0.973762	1.00771
finn-b-DIABETES_FG	cardiac function	Diabetes, varying definitions || id:finn-b-DIABETES_FG	Inverse variance weighted	29	-0.00945334	0.00874261	0.279566	-0.0265889	0.00768218	0.990591	0.973762	1.00771
finn-b-DM_COMORB_EXMORE	cardiac function	Diabetes-related co-morbidities/complications (more controls excluded) || id:finn-b-DM_COMORB_EXMORE	Inverse variance weighted	4	0.0150241	0.0257476	0.559546	-0.0354411	0.0654893	1.01514	0.96518	1.06768
finn-b-DM_COMORB_EXMORE	cardiac function	Diabetes-related co-morbidities/complications (more controls excluded) || id:finn-b-DM_COMORB_EXMORE	Inverse variance weighted	4	0.0150241	0.0257476	0.559546	-0.0354411	0.0654893	1.01514	0.96518	1.06768
finn-b-DM_OTHER_WIDE	cardiac function	Other diabetes, wide definition || id:finn-b-DM_OTHER_WIDE	Inverse variance weighted	28	-0.00230889	0.00780977	0.767504	-0.017616	0.0129983	0.997694	0.982538	1.01308
finn-b-DM_OTHER_WIDE	cardiac function	Other diabetes, wide definition || id:finn-b-DM_OTHER_WIDE	Inverse variance weighted	28	-0.00230889	0.00780977	0.767504	-0.017616	0.0129983	0.997694	0.982538	1.01308
finn-b-DM_RETINOPATHY	cardiac function	Diabetic retinopathy (DM_RETINOPATHY) || id:finn-b-DM_RETINOPATHY	Inverse variance weighted	4	-0.00730403	0.0163955	0.655966	-0.0394392	0.0248312	0.992723	0.961328	1.02514
finn-b-DM_RETINOPATHY	cardiac function	Diabetic retinopathy (DM_RETINOPATHY) || id:finn-b-DM_RETINOPATHY	Inverse variance weighted	4	-0.00730403	0.0163955	0.655966	-0.0394392	0.0248312	0.992723	0.961328	1.02514
finn-b-DM_RETINOPATHY_EXMORE	cardiac function	Diabetic retinopathy (more controls excluded) || id:finn-b-DM_RETINOPATHY_EXMORE	Inverse variance weighted	4	-0.00518859	0.0147818	0.725579	-0.0341609	0.0237837	0.994825	0.966416	1.02407
finn-b-DM_RETINOPATHY_EXMORE	cardiac function	Diabetic retinopathy (more controls excluded) || id:finn-b-DM_RETINOPATHY_EXMORE	Inverse variance weighted	4	-0.00518859	0.0147818	0.725579	-0.0341609	0.0237837	0.994825	0.966416	1.02407
finn-b-E4_DIABETES	cardiac function	Diabetes mellitus || id:finn-b-E4_DIABETES	Inverse variance weighted	29	-0.00268796	0.00850752	0.75204	-0.0193627	0.0139868	0.997316	0.980824	1.01409
finn-b-E4_DIABETES	cardiac function	Diabetes mellitus || id:finn-b-E4_DIABETES	Inverse variance weighted	29	-0.00268796	0.00850752	0.75204	-0.0193627	0.0139868	0.997316	0.980824	1.01409
finn-b-E4_DM1NOCOMP	cardiac function	Type 1 diabetes without complications || id:finn-b-E4_DM1NOCOMP	Inverse variance weighted	4	0.00639396	0.00901684	0.478254	-0.011279	0.024067	1.00641	0.988784	1.02436
finn-b-E4_DM1NOCOMP	cardiac function	Type 1 diabetes without complications || id:finn-b-E4_DM1NOCOMP	Inverse variance weighted	4	0.00639396	0.00901684	0.478254	-0.011279	0.024067	1.00641	0.988784	1.02436
ebi-a-GCST003739	cardiac function	Esophageal adenocarcinoma || id:ebi-a-GCST003739	Inverse variance weighted	3	0.00888593	0.0224655	0.692446	-0.0351464	0.0529182	1.00893	0.965464	1.05434
finn-b-E4_DM2	cardiac function	Type 2 diabetes || id:finn-b-E4_DM2	Inverse variance weighted	33	0.000244933	0.00821408	0.976212	-0.0158547	0.0163445	1.00024	0.98427	1.01648
finn-b-E4_DM2	cardiac function	Type 2 diabetes || id:finn-b-E4_DM2	Inverse variance weighted	33	0.000244933	0.00821408	0.976212	-0.0158547	0.0163445	1.00024	0.98427	1.01648
finn-b-E4_DM2_STRICT	cardiac function	Type 2 diabetes, strict (exclude DM1) || id:finn-b-E4_DM2_STRICT	Inverse variance weighted	30	-0.00553318	0.00886454	0.532501	-0.0229077	0.0118413	0.994482	0.977353	1.01191
finn-b-E4_DM2_STRICT	cardiac function	Type 2 diabetes, strict (exclude DM1) || id:finn-b-E4_DM2_STRICT	Inverse variance weighted	30	-0.00553318	0.00886454	0.532501	-0.0229077	0.0118413	0.994482	0.977353	1.01191
finn-b-E4_DM2NASCOMP	cardiac function	Type 2 diabetes with other specified/multiple/unspecified complications || id:finn-b-E4_DM2NASCOMP	Inverse variance weighted	31	-0.00523018	0.00832607	0.529893	-0.0215493	0.0110889	0.994783	0.978681	1.01115
finn-b-E4_DM2NASCOMP	cardiac function	Type 2 diabetes with other specified/multiple/unspecified complications || id:finn-b-E4_DM2NASCOMP	Inverse variance weighted	31	-0.00523018	0.00832607	0.529893	-0.0215493	0.0110889	0.994783	0.978681	1.01115
finn-b-E4_DM2NOCOMP	cardiac function	Type 2 diabetes without complications || id:finn-b-E4_DM2NOCOMP	Inverse variance weighted	10	0.00553176	0.0105454	0.599883	-0.0151371	0.0262007	1.00555	0.984977	1.02655
finn-b-E4_DM2NOCOMP	cardiac function	Type 2 diabetes without complications || id:finn-b-E4_DM2NOCOMP	Inverse variance weighted	10	0.00553176	0.0105454	0.599883	-0.0151371	0.0262007	1.00555	0.984977	1.02655
finn-b-E4_ENDONUTRMET	cardiac function	Endocrine, nutritional and metabolic diseases || id:finn-b-E4_ENDONUTRMET	Inverse variance weighted	9	-0.0143693	0.0246799	0.560414	-0.062742	0.0340034	0.985733	0.939186	1.03459
finn-b-E4_ENDONUTRMET	cardiac function	Endocrine, nutritional and metabolic diseases || id:finn-b-E4_ENDONUTRMET	Inverse variance weighted	9	-0.0143693	0.0246799	0.560414	-0.062742	0.0340034	0.985733	0.939186	1.03459
finn-b-E4_GOITREMULTINOD	cardiac function	Nontoxic multinodular goitre || id:finn-b-E4_GOITREMULTINOD	Inverse variance weighted	10	0.00353077	0.0076309	0.643584	-0.0114258	0.0184873	1.00354	0.988639	1.01866
finn-b-E4_GOITREMULTINOD	cardiac function	Nontoxic multinodular goitre || id:finn-b-E4_GOITREMULTINOD	Inverse variance weighted	10	0.00353077	0.0076309	0.643584	-0.0114258	0.0184873	1.00354	0.988639	1.01866
finn-b-E4_HYPERCHOL	cardiac function	Pure hypercholesterolaemia || id:finn-b-E4_HYPERCHOL	Inverse variance weighted	8	-0.00272871	0.0118903	0.818488	-0.0260337	0.0205763	0.997275	0.974302	1.02079
finn-b-E4_HYPERCHOL	cardiac function	Pure hypercholesterolaemia || id:finn-b-E4_HYPERCHOL	Inverse variance weighted	8	-0.00272871	0.0118903	0.818488	-0.0260337	0.0205763	0.997275	0.974302	1.02079
finn-b-E4_HYTHY_AI_STRICT	cardiac function	Hypothyroidism, strict autoimmune || id:finn-b-E4_HYTHY_AI_STRICT	Inverse variance weighted	27	-0.00145631	0.00751891	0.846422	-0.0161934	0.0132808	0.998545	0.983937	1.01337
finn-b-E4_HYTHY_AI_STRICT	cardiac function	Hypothyroidism, strict autoimmune || id:finn-b-E4_HYTHY_AI_STRICT	Inverse variance weighted	27	-0.00145631	0.00751891	0.846422	-0.0161934	0.0132808	0.998545	0.983937	1.01337
finn-b-E4_HYTHY_AI_STRICT_PURCH	cardiac function	Hypothyroidism, strict autoimmune, 3 medication purchases required || id:finn-b-E4_HYTHY_AI_STRICT_PURCH	Inverse variance weighted	28	-0.0017237	0.00793715	0.828077	-0.0172805	0.0138331	0.998278	0.982868	1.01393
finn-b-E4_HYTHY_AI_STRICT_PURCH	cardiac function	Hypothyroidism, strict autoimmune, 3 medication purchases required || id:finn-b-E4_HYTHY_AI_STRICT_PURCH	Inverse variance weighted	28	-0.0017237	0.00793715	0.828077	-0.0172805	0.0138331	0.998278	0.982868	1.01393
finn-b-E4_HYTHYNAS	cardiac function	Hypothyroidism, other/unspecified || id:finn-b-E4_HYTHYNAS	Inverse variance weighted	26	0.000711177	0.00824662	0.931277	-0.0154522	0.0168746	1.00071	0.984667	1.01702
finn-b-E4_HYTHYNAS	cardiac function	Hypothyroidism, other/unspecified || id:finn-b-E4_HYTHYNAS	Inverse variance weighted	26	0.000711177	0.00824662	0.931277	-0.0154522	0.0168746	1.00071	0.984667	1.01702
finn-b-E4_LIPOPROT	cardiac function	Disorders of lipoprotein metabolism and other lipidaemias || id:finn-b-E4_LIPOPROT	Inverse variance weighted	11	-0.00371395	0.00958361	0.698362	-0.0224978	0.0150699	0.996293	0.977753	1.01518
finn-b-E4_LIPOPROT	cardiac function	Disorders of lipoprotein metabolism and other lipidaemias || id:finn-b-E4_LIPOPROT	Inverse variance weighted	11	-0.00371395	0.00958361	0.698362	-0.0224978	0.0150699	0.996293	0.977753	1.01518
finn-b-E4_METABOLIA	cardiac function	Metabolic disorders || id:finn-b-E4_METABOLIA	Inverse variance weighted	6	-0.000108048	0.0243566	0.996461	-0.0478469	0.0476308	0.999892	0.95328	1.04878
finn-b-E4_METABOLIA	cardiac function	Metabolic disorders || id:finn-b-E4_METABOLIA	Inverse variance weighted	6	-0.000108048	0.0243566	0.996461	-0.0478469	0.0476308	0.999892	0.95328	1.04878
finn-b-E4_OBESITY	cardiac function	Obesity || id:finn-b-E4_OBESITY	Inverse variance weighted	4	-0.0260704	0.0177786	0.142541	-0.0609164	0.00877559	0.974267	0.940902	1.00881
finn-b-E4_OBESITY	cardiac function	Obesity || id:finn-b-E4_OBESITY	Inverse variance weighted	4	-0.0260704	0.0177786	0.142541	-0.0609164	0.00877559	0.974267	0.940902	1.00881
finn-b-E4_OBESITY_HYPER	cardiac function	Obesity and other hyperalimentation || id:finn-b-E4_OBESITY_HYPER	Inverse variance weighted	5	-0.0302546	0.015226	0.0469194	-0.0600976	-0.000411517	0.970199	0.941673	0.999589
finn-b-E4_OBESITY_HYPER	cardiac function	Obesity and other hyperalimentation || id:finn-b-E4_OBESITY_HYPER	Inverse variance weighted	5	-0.0302546	0.015226	0.0469194	-0.0600976	-0.000411517	0.970199	0.941673	0.999589
finn-b-E4_OBESITYNAS	cardiac function	Obesity, other/unspecified || id:finn-b-E4_OBESITYNAS	Inverse variance weighted	4	-0.0326627	0.0106629	0.00218968	-0.0535619	-0.0117635	0.967865	0.947847	0.988305
finn-b-E4_OBESITYNAS	cardiac function	Obesity, other/unspecified || id:finn-b-E4_OBESITYNAS	Inverse variance weighted	4	-0.0326627	0.0106629	0.00218968	-0.0535619	-0.0117635	0.967865	0.947847	0.988305
ebi-a-GCST003739	cardiac function	Esophageal adenocarcinoma || id:ebi-a-GCST003739	Inverse variance weighted	3	0.00888593	0.0224655	0.692446	-0.0351464	0.0529182	1.00893	0.965464	1.05434
finn-b-E4_THYROID	cardiac function	Disorders of the thyroid gland || id:finn-b-E4_THYROID	Inverse variance weighted	14	-0.0080818	0.0129904	0.533853	-0.033543	0.0173794	0.991951	0.967013	1.01753
finn-b-E4_THYROID	cardiac function	Disorders of the thyroid gland || id:finn-b-E4_THYROID	Inverse variance weighted	14	-0.0080818	0.0129904	0.533853	-0.033543	0.0173794	0.991951	0.967013	1.01753
finn-b-E4_THYTOXGOITDIF	cardiac function	Thyrotoxicosis with diffuse goitre || id:finn-b-E4_THYTOXGOITDIF	Inverse variance weighted	4	-0.000441733	0.010932	0.967769	-0.0218685	0.0209851	0.999558	0.978369	1.02121
finn-b-E4_THYTOXGOITDIF	cardiac function	Thyrotoxicosis with diffuse goitre || id:finn-b-E4_THYTOXGOITDIF	Inverse variance weighted	4	-0.000441733	0.010932	0.967769	-0.0218685	0.0209851	0.999558	0.978369	1.02121
finn-b-E4_THYTOXGOITMULT	cardiac function	Thyrotoxicosis with toxic multinodular goitre || id:finn-b-E4_THYTOXGOITMULT	Inverse variance weighted	4	0.0114805	0.00488705	0.0188156	0.00190187	0.0210591	1.01155	1.0019	1.02128
finn-b-E4_THYTOXGOITMULT	cardiac function	Thyrotoxicosis with toxic multinodular goitre || id:finn-b-E4_THYTOXGOITMULT	Inverse variance weighted	4	0.0114805	0.00488705	0.0188156	0.00190187	0.0210591	1.01155	1.0019	1.02128
finn-b-E4_THYTOXNAS	cardiac function	Thyrotoxicosis, other and/or unspecified || id:finn-b-E4_THYTOXNAS	Inverse variance weighted	5	-0.012153	0.0108652	0.26334	-0.0334487	0.00914268	0.987921	0.967105	1.00918
finn-b-E4_THYTOXNAS	cardiac function	Thyrotoxicosis, other and/or unspecified || id:finn-b-E4_THYTOXNAS	Inverse variance weighted	5	-0.012153	0.0108652	0.26334	-0.0334487	0.00914268	0.987921	0.967105	1.00918
finn-b-FG_CVD	cardiac function	Cardiovascular diseases (excluding rheumatic etc) || id:finn-b-FG_CVD	Inverse variance weighted	8	0.00344982	0.0461879	0.940461	-0.0870784	0.0939781	1.00346	0.916605	1.09854
finn-b-FG_CVD	cardiac function	Cardiovascular diseases (excluding rheumatic etc) || id:finn-b-FG_CVD	Inverse variance weighted	8	0.00344982	0.0461879	0.940461	-0.0870784	0.0939781	1.00346	0.916605	1.09854
finn-b-FG_DISVEINLYMPH	cardiac function	Diseases of veins, lymphatic vessels and lymph nodes, not elsewhere classified (FINNGEN) || id:finn-b-FG_DISVEINLYMPH	Inverse variance weighted	13	0.00125691	0.0133523	0.925002	-0.0249137	0.0274275	1.00126	0.975394	1.02781
finn-b-FG_DISVEINLYMPH	cardiac function	Diseases of veins, lymphatic vessels and lymph nodes, not elsewhere classified (FINNGEN) || id:finn-b-FG_DISVEINLYMPH	Inverse variance weighted	13	0.00125691	0.0133523	0.925002	-0.0249137	0.0274275	1.00126	0.975394	1.02781
finn-b-FG_HYPERTENSION	cardiac function	Hypertensive diseases (excluding secondary) || id:finn-b-FG_HYPERTENSION	Inverse variance weighted	36	-0.0290266	0.0132023	0.0279059	-0.054903	-0.00315014	0.971391	0.946577	0.996855
finn-b-FG_HYPERTENSION	cardiac function	Hypertensive diseases (excluding secondary) || id:finn-b-FG_HYPERTENSION	Inverse variance weighted	36	-0.0290266	0.0132023	0.0279059	-0.054903	-0.00315014	0.971391	0.946577	0.996855
ebi-a-GCST003740	cardiac function	Barrett's esophagus or Esophageal adenocarcinoma || id:ebi-a-GCST003740	Inverse variance weighted	4	-0.0111328	0.0164853	0.499475	-0.0434439	0.0211783	0.988929	0.957486	1.0214
finn-b-G6_SLEEPAPNO	cardiac function	Sleep apnoea || id:finn-b-G6_SLEEPAPNO	Inverse variance weighted	4	-0.0283778	0.0233908	0.225052	-0.0742238	0.0174682	0.972021	0.928464	1.01762
finn-b-G6_SLEEPAPNO	cardiac function	Sleep apnoea || id:finn-b-G6_SLEEPAPNO	Inverse variance weighted	4	-0.0283778	0.0233908	0.225052	-0.0742238	0.0174682	0.972021	0.928464	1.01762
finn-b-G6_SLEEPAPNO_INCLAVO	cardiac function	Sleep apnoea, including avohilmo || id:finn-b-G6_SLEEPAPNO_INCLAVO	Inverse variance weighted	4	-0.028595	0.0234991	0.223659	-0.0746532	0.0174632	0.97181	0.928065	1.01762
finn-b-G6_SLEEPAPNO_INCLAVO	cardiac function	Sleep apnoea, including avohilmo || id:finn-b-G6_SLEEPAPNO_INCLAVO	Inverse variance weighted	4	-0.028595	0.0234991	0.223659	-0.0746532	0.0174632	0.97181	0.928065	1.01762
finn-b-H7_AMD	cardiac function	Age-related macular degeneration (whether dry or wet) || id:finn-b-H7_AMD	Inverse variance weighted	4	-0.00306293	0.00373599	0.412304	-0.0103855	0.0042596	0.996942	0.989668	1.00427
finn-b-H7_AMD	cardiac function	Age-related macular degeneration (whether dry or wet) || id:finn-b-H7_AMD	Inverse variance weighted	4	-0.00306293	0.00373599	0.412304	-0.0103855	0.0042596	0.996942	0.989668	1.00427
finn-b-H7_CATARACTSENILE	cardiac function	Senile cataract || id:finn-b-H7_CATARACTSENILE	Inverse variance weighted	7	-0.0130528	0.0131142	0.319582	-0.0387567	0.0126511	0.987032	0.961985	1.01273
finn-b-H7_CATARACTSENILE	cardiac function	Senile cataract || id:finn-b-H7_CATARACTSENILE	Inverse variance weighted	7	-0.0130528	0.0131142	0.319582	-0.0387567	0.0126511	0.987032	0.961985	1.01273
ebi-a-GCST003740	cardiac function	Barrett's esophagus or Esophageal adenocarcinoma || id:ebi-a-GCST003740	Inverse variance weighted	4	-0.0111328	0.0164853	0.499475	-0.0434439	0.0211783	0.988929	0.957486	1.0214
finn-b-H7_GLAUCOMA	cardiac function	Glaucoma || id:finn-b-H7_GLAUCOMA	Inverse variance weighted	4	-0.000802427	0.0114505	0.944132	-0.0232454	0.0216406	0.999198	0.977023	1.02188
finn-b-H7_GLAUCOMA	cardiac function	Glaucoma || id:finn-b-H7_GLAUCOMA	Inverse variance weighted	4	-0.000802427	0.0114505	0.944132	-0.0232454	0.0216406	0.999198	0.977023	1.02188
finn-b-H7_GLAUCOMA_POAG	cardiac function	Primary open-angle glaucoma, strict || id:finn-b-H7_GLAUCOMA_POAG	Inverse variance weighted	5	-0.00352631	0.00820732	0.667447	-0.0196127	0.01256	0.99648	0.980578	1.01264
finn-b-H7_GLAUCOMA_POAG	cardiac function	Primary open-angle glaucoma, strict || id:finn-b-H7_GLAUCOMA_POAG	Inverse variance weighted	5	-0.00352631	0.00820732	0.667447	-0.0196127	0.01256	0.99648	0.980578	1.01264
finn-b-H7_GLAUCPRIMOPEN	cardiac function	Primary open-angle glaucoma || id:finn-b-H7_GLAUCPRIMOPEN	Inverse variance weighted	4	-0.0043838	0.00820189	0.593005	-0.0204595	0.0116919	0.995626	0.979748	1.01176
finn-b-H7_GLAUCPRIMOPEN	cardiac function	Primary open-angle glaucoma || id:finn-b-H7_GLAUCPRIMOPEN	Inverse variance weighted	4	-0.0043838	0.00820189	0.593005	-0.0204595	0.0116919	0.995626	0.979748	1.01176
finn-b-H7_LENS	cardiac function	Disorders of lens || id:finn-b-H7_LENS	Inverse variance weighted	7	-0.0137613	0.0135581	0.310111	-0.0403353	0.0128126	0.986333	0.960467	1.0129
finn-b-H7_LENS	cardiac function	Disorders of lens || id:finn-b-H7_LENS	Inverse variance weighted	7	-0.0137613	0.0135581	0.310111	-0.0403353	0.0128126	0.986333	0.960467	1.0129
bbj-a-10	cardiac function	Blood sugar || id:bbj-a-10	Inverse variance weighted	8	-0.00931397	0.0345164	0.787282	-0.0769661	0.0583381	0.990729	0.925921	1.06007
finn-b-H8_CONSENHEARINGLOSS	cardiac function	Conductive and sensorineural hearing loss || id:finn-b-H8_CONSENHEARINGLOSS	Inverse variance weighted	3	0.022891	0.0255289	0.369895	-0.0271457	0.0729277	1.02316	0.973219	1.07565
finn-b-H8_CONSENHEARINGLOSS	cardiac function	Conductive and sensorineural hearing loss || id:finn-b-H8_CONSENHEARINGLOSS	Inverse variance weighted	3	0.022891	0.0255289	0.369895	-0.0271457	0.0729277	1.02316	0.973219	1.07565
finn-b-H8_HL_SEN_NAS	cardiac function	Sensorineural hearing loss || id:finn-b-H8_HL_SEN_NAS	Inverse variance weighted	4	0.022377	0.0217569	0.303715	-0.0202666	0.0650206	1.02263	0.979937	1.06718
finn-b-H8_HL_SEN_NAS	cardiac function	Sensorineural hearing loss || id:finn-b-H8_HL_SEN_NAS	Inverse variance weighted	4	0.022377	0.0217569	0.303715	-0.0202666	0.0650206	1.02263	0.979937	1.06718
finn-b-H8_OTOSCLE	cardiac function	Otosclerosis || id:finn-b-H8_OTOSCLE	Inverse variance weighted	5	0.00237675	0.00914353	0.794912	-0.0155446	0.0202981	1.00238	0.984576	1.02051
finn-b-H8_OTOSCLE	cardiac function	Otosclerosis || id:finn-b-H8_OTOSCLE	Inverse variance weighted	5	0.00237675	0.00914353	0.794912	-0.0155446	0.0202981	1.00238	0.984576	1.02051
finn-b-HYPOTHY_LEVOTHY	cardiac function	Hypothyroidism, levothyroxin purchases || id:finn-b-HYPOTHY_LEVOTHY	Inverse variance weighted	10	-0.0108597	0.00968504	0.262167	-0.0298424	0.00812299	0.989199	0.970599	1.00816
finn-b-HYPOTHY_LEVOTHY	cardiac function	Hypothyroidism, levothyroxin purchases || id:finn-b-HYPOTHY_LEVOTHY	Inverse variance weighted	10	-0.0108597	0.00968504	0.262167	-0.0298424	0.00812299	0.989199	0.970599	1.00816
finn-b-HYPOTHY_PURCHASE	cardiac function	Hypothyroidism and >3 levothyroxin purchases || id:finn-b-HYPOTHY_PURCHASE	Inverse variance weighted	10	-0.0108597	0.00968504	0.262167	-0.0298424	0.00812299	0.989199	0.970599	1.00816
finn-b-HYPOTHY_PURCHASE	cardiac function	Hypothyroidism and >3 levothyroxin purchases || id:finn-b-HYPOTHY_PURCHASE	Inverse variance weighted	10	-0.0108597	0.00968504	0.262167	-0.0298424	0.00812299	0.989199	0.970599	1.00816
finn-b-HYPOTHYROIDISM	cardiac function	Hypothyroidism (congenital or acquired) || id:finn-b-HYPOTHYROIDISM	Inverse variance weighted	14	-0.0041547	0.00912713	0.648963	-0.0220439	0.0137345	0.995854	0.978197	1.01383
finn-b-HYPOTHYROIDISM	cardiac function	Hypothyroidism (congenital or acquired) || id:finn-b-HYPOTHYROIDISM	Inverse variance weighted	14	-0.0041547	0.00912713	0.648963	-0.0220439	0.0137345	0.995854	0.978197	1.01383
finn-b-I9_AF	cardiac function	Atrial fibrillation and flutter || id:finn-b-I9_AF	Inverse variance weighted	18	-0.00136509	0.0118812	0.908528	-0.0246522	0.021922	0.998636	0.975649	1.02216
finn-b-I9_AF	cardiac function	Atrial fibrillation and flutter || id:finn-b-I9_AF	Inverse variance weighted	18	-0.00136509	0.0118812	0.908528	-0.0246522	0.021922	0.998636	0.975649	1.02216
finn-b-I9_AF_EXNONE	cardiac function	Atrial fibrillation and flutter (no controls excluded) || id:finn-b-I9_AF_EXNONE	Inverse variance weighted	23	-0.00337389	0.0112264	0.76377	-0.0253775	0.0186298	0.996632	0.974942	1.0188
finn-b-I9_AF_EXNONE	cardiac function	Atrial fibrillation and flutter (no controls excluded) || id:finn-b-I9_AF_EXNONE	Inverse variance weighted	23	-0.00337389	0.0112264	0.76377	-0.0253775	0.0186298	0.996632	0.974942	1.0188
finn-b-I9_AF_REIMB	cardiac function	Atrial fibrillation and flutter with reimbursement || id:finn-b-I9_AF_REIMB	Inverse variance weighted	14	0.00600754	0.0104001	0.563505	-0.0143766	0.0263917	1.00603	0.985726	1.02674
finn-b-I9_AF_REIMB	cardiac function	Atrial fibrillation and flutter with reimbursement || id:finn-b-I9_AF_REIMB	Inverse variance weighted	14	0.00600754	0.0104001	0.563505	-0.0143766	0.0263917	1.00603	0.985726	1.02674
finn-b-I9_ANGINA	cardiac function	Angina pectoris || id:finn-b-I9_ANGINA	Inverse variance weighted	12	-0.00571405	0.0137654	0.678067	-0.0326942	0.0212661	0.994302	0.967834	1.02149
finn-b-I9_ANGINA	cardiac function	Angina pectoris || id:finn-b-I9_ANGINA	Inverse variance weighted	12	-0.00571405	0.0137654	0.678067	-0.0326942	0.0212661	0.994302	0.967834	1.02149
finn-b-I9_ANGINA_EXNONE	cardiac function	Angina pectoris (no controls excluded) || id:finn-b-I9_ANGINA_EXNONE	Inverse variance weighted	6	-0.00158398	0.0130836	0.903639	-0.0272278	0.0240599	0.998417	0.97314	1.02435
finn-b-I9_ANGINA_EXNONE	cardiac function	Angina pectoris (no controls excluded) || id:finn-b-I9_ANGINA_EXNONE	Inverse variance weighted	6	-0.00158398	0.0130836	0.903639	-0.0272278	0.0240599	0.998417	0.97314	1.02435
finn-b-I9_ANGIO	cardiac function	Coronary angiopasty || id:finn-b-I9_ANGIO	Inverse variance weighted	8	-0.00439742	0.0073183	0.54792	-0.0187413	0.00994645	0.995612	0.981433	1.01
finn-b-I9_ANGIO	cardiac function	Coronary angiopasty || id:finn-b-I9_ANGIO	Inverse variance weighted	8	-0.00439742	0.0073183	0.54792	-0.0187413	0.00994645	0.995612	0.981433	1.01
finn-b-I9_ANGIO_EXNONE	cardiac function	Coronary angiopasty (no controls excluded) || id:finn-b-I9_ANGIO_EXNONE	Inverse variance weighted	3	0.00223893	0.0134478	0.86777	-0.0241187	0.0285965	1.00224	0.97617	1.02901
finn-b-I9_ANGIO_EXNONE	cardiac function	Coronary angiopasty (no controls excluded) || id:finn-b-I9_ANGIO_EXNONE	Inverse variance weighted	3	0.00223893	0.0134478	0.86777	-0.0241187	0.0285965	1.00224	0.97617	1.02901
finn-b-I9_CABG	cardiac function	Coronary artery bypass grafting || id:finn-b-I9_CABG	Inverse variance weighted	12	-0.00184539	0.00485473	0.703855	-0.0113607	0.00766988	0.998156	0.988704	1.0077
finn-b-I9_CABG	cardiac function	Coronary artery bypass grafting || id:finn-b-I9_CABG	Inverse variance weighted	12	-0.00184539	0.00485473	0.703855	-0.0113607	0.00766988	0.998156	0.988704	1.0077
finn-b-I9_CABG_EXNONE	cardiac function	Coronary artery bypass grafting (no controls excluded) || id:finn-b-I9_CABG_EXNONE	Inverse variance weighted	8	-0.00518733	0.00601936	0.388811	-0.0169853	0.00661061	0.994826	0.983158	1.00663
finn-b-I9_CABG_EXNONE	cardiac function	Coronary artery bypass grafting (no controls excluded) || id:finn-b-I9_CABG_EXNONE	Inverse variance weighted	8	-0.00518733	0.00601936	0.388811	-0.0169853	0.00661061	0.994826	0.983158	1.00663
finn-b-I9_CHD	cardiac function	Major coronary heart disease event || id:finn-b-I9_CHD	Inverse variance weighted	12	-0.00220956	0.0118187	0.851697	-0.0253743	0.0209552	0.997793	0.974945	1.02118
finn-b-I9_CHD	cardiac function	Major coronary heart disease event || id:finn-b-I9_CHD	Inverse variance weighted	12	-0.00220956	0.0118187	0.851697	-0.0253743	0.0209552	0.997793	0.974945	1.02118
finn-b-I9_CORATHER	cardiac function	Coronary atherosclerosis || id:finn-b-I9_CORATHER	Inverse variance weighted	17	0.00648094	0.0141026	0.645834	-0.0211601	0.034122	1.0065	0.979062	1.03471
finn-b-I9_CORATHER	cardiac function	Coronary atherosclerosis || id:finn-b-I9_CORATHER	Inverse variance weighted	17	0.00648094	0.0141026	0.645834	-0.0211601	0.034122	1.0065	0.979062	1.03471
finn-b-I9_CORATHER_EXNONE	cardiac function	Coronary atherosclerosis (no controls excluded) || id:finn-b-I9_CORATHER_EXNONE	Inverse variance weighted	13	0.0127981	0.01812	0.480004	-0.0227172	0.0483134	1.01288	0.977539	1.0495
finn-b-I9_CORATHER_EXNONE	cardiac function	Coronary atherosclerosis (no controls excluded) || id:finn-b-I9_CORATHER_EXNONE	Inverse variance weighted	13	0.0127981	0.01812	0.480004	-0.0227172	0.0483134	1.01288	0.977539	1.0495
finn-b-I9_CVD	cardiac function	Cardiovascular diseases || id:finn-b-I9_CVD	Inverse variance weighted	5	-0.0242183	0.0504054	0.630893	-0.123013	0.0745763	0.976073	0.884252	1.07743
finn-b-I9_CVD	cardiac function	Cardiovascular diseases || id:finn-b-I9_CVD	Inverse variance weighted	5	-0.0242183	0.0504054	0.630893	-0.123013	0.0745763	0.976073	0.884252	1.07743
finn-b-I9_CVD_HARD	cardiac function	Hard cardiovascular diseases || id:finn-b-I9_CVD_HARD	Inverse variance weighted	5	0.000829735	0.0371721	0.982192	-0.0720275	0.073687	1.00083	0.930505	1.07647
finn-b-I9_CVD_HARD	cardiac function	Hard cardiovascular diseases || id:finn-b-I9_CVD_HARD	Inverse variance weighted	5	0.000829735	0.0371721	0.982192	-0.0720275	0.073687	1.00083	0.930505	1.07647
finn-b-I9_DISVEINLYMPH	cardiac function	Diseases of veins, lymphatic vessels and lymph nodes, not elsewhere classified || id:finn-b-I9_DISVEINLYMPH	Inverse variance weighted	11	-0.0091027	0.015039	0.544997	-0.0385791	0.0203737	0.990939	0.962156	1.02058
finn-b-I9_DISVEINLYMPH	cardiac function	Diseases of veins, lymphatic vessels and lymph nodes, not elsewhere classified || id:finn-b-I9_DISVEINLYMPH	Inverse variance weighted	11	-0.0091027	0.015039	0.544997	-0.0385791	0.0203737	0.990939	0.962156	1.02058
finn-b-I9_DVTANDPULM	cardiac function	DVT of lower extremities and pulmonary embolism || id:finn-b-I9_DVTANDPULM	Inverse variance weighted	5	0.00458595	0.0100771	0.649049	-0.0151652	0.0243371	1.0046	0.984949	1.02464
finn-b-I9_DVTANDPULM	cardiac function	DVT of lower extremities and pulmonary embolism || id:finn-b-I9_DVTANDPULM	Inverse variance weighted	5	0.00458595	0.0100771	0.649049	-0.0151652	0.0243371	1.0046	0.984949	1.02464
finn-b-I9_HYPERTENSION	cardiac function	Hypertensive diseases || id:finn-b-I9_HYPERTENSION	Inverse variance weighted	36	-0.0290266	0.0132023	0.0279059	-0.054903	-0.00315014	0.971391	0.946577	0.996855
finn-b-I9_HYPERTENSION	cardiac function	Hypertensive diseases || id:finn-b-I9_HYPERTENSION	Inverse variance weighted	36	-0.0290266	0.0132023	0.0279059	-0.054903	-0.00315014	0.971391	0.946577	0.996855
finn-b-I9_HYPTENS	cardiac function	Hypertension || id:finn-b-I9_HYPTENS	Inverse variance weighted	35	-0.0266789	0.0131958	0.043199	-0.0525426	-0.000815244	0.973674	0.948814	0.999185
finn-b-I9_HYPTENS	cardiac function	Hypertension || id:finn-b-I9_HYPTENS	Inverse variance weighted	35	-0.0266789	0.0131958	0.043199	-0.0525426	-0.000815244	0.973674	0.948814	0.999185
finn-b-I9_HYPTENS_EXNONE	cardiac function	Hypertension (no controls excluded) || id:finn-b-I9_HYPTENS_EXNONE	Inverse variance weighted	35	-0.0266679	0.01317	0.0428783	-0.0524812	-0.000854651	0.973685	0.948872	0.999146
finn-b-I9_HYPTENS_EXNONE	cardiac function	Hypertension (no controls excluded) || id:finn-b-I9_HYPTENS_EXNONE	Inverse variance weighted	35	-0.0266679	0.01317	0.0428783	-0.0524812	-0.000854651	0.973685	0.948872	0.999146
finn-b-I9_HYPTENSESS	cardiac function	Hypertension, essential || id:finn-b-I9_HYPTENSESS	Inverse variance weighted	17	-0.00265776	0.0227486	0.906993	-0.0472451	0.0419295	0.997346	0.953854	1.04282
finn-b-I9_HYPTENSESS	cardiac function	Hypertension, essential || id:finn-b-I9_HYPTENSESS	Inverse variance weighted	17	-0.00265776	0.0227486	0.906993	-0.0472451	0.0419295	0.997346	0.953854	1.04282
finn-b-I9_HYPTENSESS_EXNONE	cardiac function	""""""""Hypertension, essential"""""""" (no controls excluded) || id:finn-b-I9_HYPTENSESS_EXNONE	Inverse variance weighted	11	0.00756953	0.0295906	0.798099	-0.0504281	0.0655671	1.0076	0.950822	1.06776
finn-b-I9_HYPTENSESS_EXNONE	cardiac function	""""""""Hypertension, essential"""""""" (no controls excluded) || id:finn-b-I9_HYPTENSESS_EXNONE	Inverse variance weighted	11	0.00756953	0.0295906	0.798099	-0.0504281	0.0655671	1.0076	0.950822	1.06776
finn-b-I9_HYPTENSPREG	cardiac function	Hypertension complicating pregnancy, childbirth, and the puerperium || id:finn-b-I9_HYPTENSPREG	Inverse variance weighted	4	0.00629104	0.0228927	0.783466	-0.0385787	0.0511607	1.00631	0.962156	1.05249
finn-b-I9_HYPTENSPREG	cardiac function	Hypertension complicating pregnancy, childbirth, and the puerperium || id:finn-b-I9_HYPTENSPREG	Inverse variance weighted	4	0.00629104	0.0228927	0.783466	-0.0385787	0.0511607	1.00631	0.962156	1.05249
finn-b-I9_IHD	cardiac function	Ischaemic heart disease, wide definition || id:finn-b-I9_IHD	Inverse variance weighted	13	0.000540185	0.0168235	0.974385	-0.0324339	0.0335143	1.00054	0.968086	1.03408
finn-b-I9_IHD	cardiac function	Ischaemic heart disease, wide definition || id:finn-b-I9_IHD	Inverse variance weighted	13	0.000540185	0.0168235	0.974385	-0.0324339	0.0335143	1.00054	0.968086	1.03408
finn-b-I9_ISCHHEART	cardiac function	Ischemic heart diseases || id:finn-b-I9_ISCHHEART	Inverse variance weighted	12	-0.000596236	0.0181491	0.973792	-0.0361684	0.0349759	0.999404	0.964478	1.03559
finn-b-I9_ISCHHEART	cardiac function	Ischemic heart diseases || id:finn-b-I9_ISCHHEART	Inverse variance weighted	12	-0.000596236	0.0181491	0.973792	-0.0361684	0.0349759	0.999404	0.964478	1.03559
finn-b-I9_MI	cardiac function	Myocardial infarction || id:finn-b-I9_MI	Inverse variance weighted	8	-0.00431818	0.00824566	0.600494	-0.0204797	0.0118433	0.995691	0.979729	1.01191
finn-b-I9_MI	cardiac function	Myocardial infarction || id:finn-b-I9_MI	Inverse variance weighted	8	-0.00431818	0.00824566	0.600494	-0.0204797	0.0118433	0.995691	0.979729	1.01191
finn-b-I9_MI_EXNONE	cardiac function	Myocardial infarction (no controls excluded) || id:finn-b-I9_MI_EXNONE	Inverse variance weighted	5	-0.0121499	0.0112154	0.278666	-0.034132	0.00983229	0.987924	0.966444	1.00988
finn-b-I9_MI_EXNONE	cardiac function	Myocardial infarction (no controls excluded) || id:finn-b-I9_MI_EXNONE	Inverse variance weighted	5	-0.0121499	0.0112154	0.278666	-0.034132	0.00983229	0.987924	0.966444	1.00988
finn-b-I9_MI_STRICT	cardiac function	Myocardial infarction, strict || id:finn-b-I9_MI_STRICT	Inverse variance weighted	7	-0.00588015	0.00953382	0.537388	-0.0245664	0.0128061	0.994137	0.975733	1.01289
finn-b-I9_MI_STRICT	cardiac function	Myocardial infarction, strict || id:finn-b-I9_MI_STRICT	Inverse variance weighted	7	-0.00588015	0.00953382	0.537388	-0.0245664	0.0128061	0.994137	0.975733	1.01289
finn-b-I9_MI_STRICT_EXNONE	cardiac function	""""""""Myocardial infarction, strict"""""""" (no controls excluded) || id:finn-b-I9_MI_STRICT_EXNONE	Inverse variance weighted	6	-0.00854952	0.0103866	0.410434	-0.0289072	0.0118082	0.991487	0.971507	1.01188
finn-b-I9_MI_STRICT_EXNONE	cardiac function	""""""""Myocardial infarction, strict"""""""" (no controls excluded) || id:finn-b-I9_MI_STRICT_EXNONE	Inverse variance weighted	6	-0.00854952	0.0103866	0.410434	-0.0289072	0.0118082	0.991487	0.971507	1.01188
finn-b-I9_PHLETHROMBDVTLOW	cardiac function	DVT of lower extremities || id:finn-b-I9_PHLETHROMBDVTLOW	Inverse variance weighted	4	0.00828351	0.01734	0.632857	-0.025703	0.04227	1.00832	0.974625	1.04318
finn-b-I9_PHLETHROMBDVTLOW	cardiac function	DVT of lower extremities || id:finn-b-I9_PHLETHROMBDVTLOW	Inverse variance weighted	4	0.00828351	0.01734	0.632857	-0.025703	0.04227	1.00832	0.974625	1.04318
finn-b-I9_PHLETHROMBDVTLOW_EXNONE	cardiac function	DVT of lower extremities (no controls excluded) || id:finn-b-I9_PHLETHROMBDVTLOW_EXNONE	Inverse variance weighted	4	0.011651	0.0174792	0.505053	-0.0226083	0.0459103	1.01172	0.977645	1.04698
finn-b-I9_PHLETHROMBDVTLOW_EXNONE	cardiac function	DVT of lower extremities (no controls excluded) || id:finn-b-I9_PHLETHROMBDVTLOW_EXNONE	Inverse variance weighted	4	0.011651	0.0174792	0.505053	-0.0226083	0.0459103	1.01172	0.977645	1.04698
finn-b-I9_REVACS_EXNONE	cardiac function	Emergency coronary revascularization (for ACS) (no controls excluded) || id:finn-b-I9_REVACS_EXNONE	Inverse variance weighted	12	-0.00604839	0.00660195	0.359587	-0.0189882	0.00689143	0.99397	0.981191	1.00692
finn-b-I9_REVACS_EXNONE	cardiac function	Emergency coronary revascularization (for ACS) (no controls excluded) || id:finn-b-I9_REVACS_EXNONE	Inverse variance weighted	12	-0.00604839	0.00660195	0.359587	-0.0189882	0.00689143	0.99397	0.981191	1.00692
finn-b-I9_REVASC	cardiac function	Coronary revascularization (ANGIO or CABG) || id:finn-b-I9_REVASC	Inverse variance weighted	15	-0.00785732	0.00577917	0.173959	-0.0191845	0.00346986	0.992173	0.980998	1.00348
finn-b-I9_REVASC	cardiac function	Coronary revascularization (ANGIO or CABG) || id:finn-b-I9_REVASC	Inverse variance weighted	15	-0.00785732	0.00577917	0.173959	-0.0191845	0.00346986	0.992173	0.980998	1.00348
finn-b-I9_REVASC_EXNONE	cardiac function	Coronary revascularization (ANGIO or CABG) (no controls excluded) || id:finn-b-I9_REVASC_EXNONE	Inverse variance weighted	12	-0.00604839	0.00660195	0.359587	-0.0189882	0.00689143	0.99397	0.981191	1.00692
finn-b-I9_REVASC_EXNONE	cardiac function	Coronary revascularization (ANGIO or CABG) (no controls excluded) || id:finn-b-I9_REVASC_EXNONE	Inverse variance weighted	12	-0.00604839	0.00660195	0.359587	-0.0189882	0.00689143	0.99397	0.981191	1.00692
finn-b-I9_VARICVE	cardiac function	Varicose veins || id:finn-b-I9_VARICVE	Inverse variance weighted	17	-3.81293e-05	0.00845012	0.9964	-0.0166004	0.0165241	0.999962	0.983537	1.01666
finn-b-I9_VARICVE	cardiac function	Varicose veins || id:finn-b-I9_VARICVE	Inverse variance weighted	17	-3.81293e-05	0.00845012	0.9964	-0.0166004	0.0165241	0.999962	0.983537	1.01666
finn-b-I9_VARICVE_EXNONE	cardiac function	Varicose veins (no controls excluded) || id:finn-b-I9_VARICVE_EXNONE	Inverse variance weighted	16	-0.00442249	0.00874993	0.613256	-0.0215723	0.0127274	0.995587	0.978659	1.01281
finn-b-I9_VARICVE_EXNONE	cardiac function	Varicose veins (no controls excluded) || id:finn-b-I9_VARICVE_EXNONE	Inverse variance weighted	16	-0.00442249	0.00874993	0.613256	-0.0215723	0.0127274	0.995587	0.978659	1.01281
finn-b-I9_VTE	cardiac function	Venous thromboembolism || id:finn-b-I9_VTE	Inverse variance weighted	6	0.0148762	0.0140259	0.28886	-0.0126145	0.0423669	1.01499	0.987465	1.04328
finn-b-I9_VTE	cardiac function	Venous thromboembolism || id:finn-b-I9_VTE	Inverse variance weighted	6	0.0148762	0.0140259	0.28886	-0.0126145	0.0423669	1.01499	0.987465	1.04328
finn-b-ILD_ENDPOINTS	cardiac function	Interstitial lung disease endpoints || id:finn-b-ILD_ENDPOINTS	Inverse variance weighted	6	-0.0170611	0.019672	0.385789	-0.0556183	0.021496	0.983084	0.9459	1.02173
finn-b-ILD_ENDPOINTS	cardiac function	Interstitial lung disease endpoints || id:finn-b-ILD_ENDPOINTS	Inverse variance weighted	6	-0.0170611	0.019672	0.385789	-0.0556183	0.021496	0.983084	0.9459	1.02173
finn-b-J10_ASTHMA	cardiac function	Asthma || id:finn-b-J10_ASTHMA	Inverse variance weighted	8	-0.0194784	0.0137985	0.158059	-0.0465236	0.00756669	0.98071	0.954542	1.0076
finn-b-J10_ASTHMA	cardiac function	Asthma || id:finn-b-J10_ASTHMA	Inverse variance weighted	8	-0.0194784	0.0137985	0.158059	-0.0465236	0.00756669	0.98071	0.954542	1.0076
finn-b-J10_ASTHMA_EXMORE	cardiac function	Asthma (more controls excluded) || id:finn-b-J10_ASTHMA_EXMORE	Inverse variance weighted	8	-0.0268901	0.0128079	0.035774	-0.0519936	-0.00178654	0.973468	0.949335	0.998215
finn-b-J10_ASTHMA_EXMORE	cardiac function	Asthma (more controls excluded) || id:finn-b-J10_ASTHMA_EXMORE	Inverse variance weighted	8	-0.0268901	0.0128079	0.035774	-0.0519936	-0.00178654	0.973468	0.949335	0.998215
finn-b-J10_ASTHMA_INCLAVO	cardiac function	Asthma, including avohilmo || id:finn-b-J10_ASTHMA_INCLAVO	Inverse variance weighted	7	-0.0131032	0.0145973	0.369374	-0.041714	0.0155075	0.986982	0.959144	1.01563
finn-b-J10_ASTHMA_INCLAVO	cardiac function	Asthma, including avohilmo || id:finn-b-J10_ASTHMA_INCLAVO	Inverse variance weighted	7	-0.0131032	0.0145973	0.369374	-0.041714	0.0155075	0.986982	0.959144	1.01563
finn-b-J10_ASTHMA_MAIN	cardiac function	Asthma (only as main-diagnosis) || id:finn-b-J10_ASTHMA_MAIN	Inverse variance weighted	7	-0.0109531	0.0135969	0.420497	-0.0376029	0.0156968	0.989107	0.963095	1.01582
finn-b-J10_ASTHMA_MAIN	cardiac function	Asthma (only as main-diagnosis) || id:finn-b-J10_ASTHMA_MAIN	Inverse variance weighted	7	-0.0109531	0.0135969	0.420497	-0.0376029	0.0156968	0.989107	0.963095	1.01582
finn-b-J10_ASTHMA_MAIN_EXMORE	cardiac function	Asthma (only as main-diagnosis) (more controls excluded) || id:finn-b-J10_ASTHMA_MAIN_EXMORE	Inverse variance weighted	7	-0.0113153	0.0136351	0.406614	-0.0380402	0.0154095	0.988748	0.962674	1.01553
finn-b-J10_ASTHMA_MAIN_EXMORE	cardiac function	Asthma (only as main-diagnosis) (more controls excluded) || id:finn-b-J10_ASTHMA_MAIN_EXMORE	Inverse variance weighted	7	-0.0113153	0.0136351	0.406614	-0.0380402	0.0154095	0.988748	0.962674	1.01553
finn-b-J10_ASTHMACOPDKELA	cardiac function	Asthma/COPD (KELA code 203) || id:finn-b-J10_ASTHMACOPDKELA	Inverse variance weighted	13	-0.0045231	0.0115776	0.696037	-0.0272153	0.0181691	0.995487	0.973152	1.01834
finn-b-J10_ASTHMACOPDKELA	cardiac function	Asthma/COPD (KELA code 203) || id:finn-b-J10_ASTHMACOPDKELA	Inverse variance weighted	13	-0.0045231	0.0115776	0.696037	-0.0272153	0.0181691	0.995487	0.973152	1.01834
finn-b-J10_LOWCHRON	cardiac function	Chronic lower respiratory diseases || id:finn-b-J10_LOWCHRON	Inverse variance weighted	9	-0.0176676	0.0154114	0.251629	-0.0478739	0.0125387	0.982488	0.953254	1.01262
finn-b-J10_LOWCHRON	cardiac function	Chronic lower respiratory diseases || id:finn-b-J10_LOWCHRON	Inverse variance weighted	9	-0.0176676	0.0154114	0.251629	-0.0478739	0.0125387	0.982488	0.953254	1.01262
finn-b-J10_NASALPOLYP	cardiac function	Nasal polyp || id:finn-b-J10_NASALPOLYP	Inverse variance weighted	6	-0.00533239	0.00663475	0.421566	-0.0183365	0.00767171	0.994682	0.981831	1.0077
finn-b-J10_NASALPOLYP	cardiac function	Nasal polyp || id:finn-b-J10_NASALPOLYP	Inverse variance weighted	6	-0.00533239	0.00663475	0.421566	-0.0183365	0.00767171	0.994682	0.981831	1.0077
finn-b-J10_RESPIRATORY	cardiac function	Diseases of the respiratory system || id:finn-b-J10_RESPIRATORY	Inverse variance weighted	4	0.0357394	0.0413514	0.38743	-0.0453092	0.116788	1.03639	0.955702	1.12388
finn-b-J10_RESPIRATORY	cardiac function	Diseases of the respiratory system || id:finn-b-J10_RESPIRATORY	Inverse variance weighted	4	0.0357394	0.0413514	0.38743	-0.0453092	0.116788	1.03639	0.955702	1.12388
finn-b-K11_APPENDACUT	cardiac function	Acute appendicitis || id:finn-b-K11_APPENDACUT	Inverse variance weighted	4	0.0265267	0.0337266	0.431562	-0.0395774	0.0926308	1.02688	0.961196	1.09706
finn-b-K11_APPENDACUT	cardiac function	Acute appendicitis || id:finn-b-K11_APPENDACUT	Inverse variance weighted	4	0.0265267	0.0337266	0.431562	-0.0395774	0.0926308	1.02688	0.961196	1.09706
finn-b-K11_CHOLELITH	cardiac function	Cholelithiasis || id:finn-b-K11_CHOLELITH	Inverse variance weighted	19	-0.000404337	0.00587832	0.945161	-0.0119258	0.0111172	0.999596	0.988145	1.01118
finn-b-K11_CHOLELITH	cardiac function	Cholelithiasis || id:finn-b-K11_CHOLELITH	Inverse variance weighted	19	-0.000404337	0.00587832	0.945161	-0.0119258	0.0111172	0.999596	0.988145	1.01118
ebi-a-GCST003770	cardiac function	Neuroticism || id:ebi-a-GCST003770	Inverse variance weighted	6	-0.0902467	0.121801	0.458733	-0.328977	0.148484	0.913706	0.71966	1.16007
finn-b-K11_DIVERTIC	cardiac function	Diverticular disease of intestine || id:finn-b-K11_DIVERTIC	Inverse variance weighted	6	0.00443178	0.0186192	0.811864	-0.0320619	0.0409255	1.00444	0.968447	1.04177
finn-b-K11_DIVERTIC	cardiac function	Diverticular disease of intestine || id:finn-b-K11_DIVERTIC	Inverse variance weighted	6	0.00443178	0.0186192	0.811864	-0.0320619	0.0409255	1.00444	0.968447	1.04177
finn-b-K11_GALLBILPANC	cardiac function	Disorders of gallbladder, biliary tract and pancreas || id:finn-b-K11_GALLBILPANC	Inverse variance weighted	15	-0.0030707	0.00702423	0.661997	-0.0168382	0.0106968	0.996934	0.983303	1.01075
finn-b-K11_GALLBILPANC	cardiac function	Disorders of gallbladder, biliary tract and pancreas || id:finn-b-K11_GALLBILPANC	Inverse variance weighted	15	-0.0030707	0.00702423	0.661997	-0.0168382	0.0106968	0.996934	0.983303	1.01075
finn-b-K11_HERING	cardiac function	Inguinal hernia || id:finn-b-K11_HERING	Inverse variance weighted	11	-0.00949582	0.0144979	0.51248	-0.0379116	0.01892	0.990549	0.962798	1.0191
finn-b-K11_HERING	cardiac function	Inguinal hernia || id:finn-b-K11_HERING	Inverse variance weighted	11	-0.00949582	0.0144979	0.51248	-0.0379116	0.01892	0.990549	0.962798	1.0191
finn-b-K11_HERNIA	cardiac function	Hernia || id:finn-b-K11_HERNIA	Inverse variance weighted	7	-0.016354	0.0259656	0.528802	-0.0672466	0.0345385	0.983779	0.934965	1.03514
finn-b-K11_HERNIA	cardiac function	Hernia || id:finn-b-K11_HERNIA	Inverse variance weighted	7	-0.016354	0.0259656	0.528802	-0.0672466	0.0345385	0.983779	0.934965	1.03514
finn-b-K11_IBD	cardiac function	Inflammatory bowel disease || id:finn-b-K11_IBD	Inverse variance weighted	7	-0.00872929	0.0145199	0.547712	-0.0371884	0.0197298	0.991309	0.963495	1.01993
finn-b-K11_IBD	cardiac function	Inflammatory bowel disease || id:finn-b-K11_IBD	Inverse variance weighted	7	-0.00872929	0.0145199	0.547712	-0.0371884	0.0197298	0.991309	0.963495	1.01993
finn-b-K11_IBD_STRICT	cardiac function	Inflammatory bowel disease, strict (require KELA) || id:finn-b-K11_IBD_STRICT	Inverse variance weighted	8	-0.0130307	0.00897861	0.146694	-0.0306288	0.00456735	0.987054	0.969835	1.00458
finn-b-K11_IBD_STRICT	cardiac function	Inflammatory bowel disease, strict (require KELA) || id:finn-b-K11_IBD_STRICT	Inverse variance weighted	8	-0.0130307	0.00897861	0.146694	-0.0306288	0.00456735	0.987054	0.969835	1.00458
finn-b-K11_KELAIBD	cardiac function	IBD patients in KELA-register || id:finn-b-K11_KELAIBD	Inverse variance weighted	8	-0.00504567	0.00850595	0.553052	-0.0217173	0.011626	0.994967	0.978517	1.01169
finn-b-K11_KELAIBD	cardiac function	IBD patients in KELA-register || id:finn-b-K11_KELAIBD	Inverse variance weighted	8	-0.00504567	0.00850595	0.553052	-0.0217173	0.011626	0.994967	0.978517	1.01169
finn-b-K11_KELAUC	cardiac function	UC patients in KELA-register ( KELA 208 prior to 1994, or ICD K51) || id:finn-b-K11_KELAUC	Inverse variance weighted	5	0.0153851	0.00980415	0.116591	-0.00383102	0.0346012	1.0155	0.996176	1.03521
finn-b-K11_KELAUC	cardiac function	UC patients in KELA-register ( KELA 208 prior to 1994, or ICD K51) || id:finn-b-K11_KELAUC	Inverse variance weighted	5	0.0153851	0.00980415	0.116591	-0.00383102	0.0346012	1.0155	0.996176	1.03521
finn-b-K11_REIMB_202	cardiac function	KELA_REIMBURSEMENT_202 || id:finn-b-K11_REIMB_202	Inverse variance weighted	3	0.0125102	0.0147755	0.39717	-0.0164497	0.0414701	1.01259	0.983685	1.04234
finn-b-K11_REIMB_202	cardiac function	KELA_REIMBURSEMENT_202 || id:finn-b-K11_REIMB_202	Inverse variance weighted	3	0.0125102	0.0147755	0.39717	-0.0164497	0.0414701	1.01259	0.983685	1.04234
finn-b-K11_ULCER	cardiac function	Ulcerative colitis || id:finn-b-K11_ULCER	Inverse variance weighted	3	0.0205593	0.0146995	0.161921	-0.0082517	0.0493704	1.02077	0.991782	1.05061
finn-b-K11_ULCER	cardiac function	Ulcerative colitis || id:finn-b-K11_ULCER	Inverse variance weighted	3	0.0205593	0.0146995	0.161921	-0.0082517	0.0493704	1.02077	0.991782	1.05061
finn-b-KELA_DIAB_INSUL	cardiac function	Diabetes, insuline treatment (Kela reimbursement) || id:finn-b-KELA_DIAB_INSUL	Inverse variance weighted	29	0.00220233	0.00799665	0.783003	-0.0134711	0.0178758	1.0022	0.986619	1.01804
finn-b-KELA_DIAB_INSUL	cardiac function	Diabetes, insuline treatment (Kela reimbursement) || id:finn-b-KELA_DIAB_INSUL	Inverse variance weighted	29	0.00220233	0.00799665	0.783003	-0.0134711	0.0178758	1.0022	0.986619	1.01804
finn-b-KELA_DIAB_INSUL_EXMORE	cardiac function	""""""""Diabetes, insuline treatment (Kela reimbursement)"""""""" (more controls excluded) || id:finn-b-KELA_DIAB_INSUL_EXMORE	Inverse variance weighted	30	-0.00257892	0.00774801	0.739248	-0.017765	0.0126072	0.997424	0.982392	1.01269
finn-b-KELA_DIAB_INSUL_EXMORE	cardiac function	""""""""Diabetes, insuline treatment (Kela reimbursement)"""""""" (more controls excluded) || id:finn-b-KELA_DIAB_INSUL_EXMORE	Inverse variance weighted	30	-0.00257892	0.00774801	0.739248	-0.017765	0.0126072	0.997424	0.982392	1.01269
finn-b-KNEE_ARTHROSIS	cardiac function	Gonarthrosis [arthrosis of knee](FG) || id:finn-b-KNEE_ARTHROSIS	Inverse variance weighted	4	-0.0557734	0.048017	0.245425	-0.149887	0.0383401	0.945753	0.860805	1.03908
ebi-a-GCST003770	cardiac function	Neuroticism || id:ebi-a-GCST003770	Inverse variance weighted	6	-0.0902467	0.121801	0.458733	-0.328977	0.148484	0.913706	0.71966	1.16007
finn-b-KNEE_ARTHROSIS	cardiac function	Gonarthrosis [arthrosis of knee](FG) || id:finn-b-KNEE_ARTHROSIS	Inverse variance weighted	4	-0.0557734	0.048017	0.245425	-0.149887	0.0383401	0.945753	0.860805	1.03908
finn-b-L12_ATOPIC	cardiac function	Atopic dermatitis || id:finn-b-L12_ATOPIC	Inverse variance weighted	8	0.0138855	0.0092899	0.134996	-0.00432272	0.0320937	1.01398	0.995687	1.03261
finn-b-L12_ATOPIC	cardiac function	Atopic dermatitis || id:finn-b-L12_ATOPIC	Inverse variance weighted	8	0.0138855	0.0092899	0.134996	-0.00432272	0.0320937	1.01398	0.995687	1.03261
ebi-a-GCST003837	cardiac function	Chronotype || id:ebi-a-GCST003837	Inverse variance weighted	6	0.0226217	0.0643109	0.725022	-0.103428	0.148671	1.02288	0.901741	1.16029
finn-b-L12_PSORIASIS	cardiac function	Psoriasis || id:finn-b-L12_PSORIASIS	Inverse variance weighted	5	0.00527601	0.0129127	0.682841	-0.020033	0.030585	1.00529	0.980166	1.03106
finn-b-L12_PSORIASIS	cardiac function	Psoriasis || id:finn-b-L12_PSORIASIS	Inverse variance weighted	5	0.00527601	0.0129127	0.682841	-0.020033	0.030585	1.00529	0.980166	1.03106
finn-b-M13_ARTHROSIS	cardiac function	Arthrosis || id:finn-b-M13_ARTHROSIS	Inverse variance weighted	7	-0.0764164	0.0222059	0.000579004	-0.11994	-0.0328928	0.92643	0.886974	0.967642
finn-b-M13_ARTHROSIS	cardiac function	Arthrosis || id:finn-b-M13_ARTHROSIS	Inverse variance weighted	7	-0.0764164	0.0222059	0.000579004	-0.11994	-0.0328928	0.92643	0.886974	0.967642
finn-b-M13_ARTHROSIS_INCLAVO	cardiac function	Artrosis, including avohilmo || id:finn-b-M13_ARTHROSIS_INCLAVO	Inverse variance weighted	6	-0.0734091	0.027764	0.0081924	-0.127827	-0.0189916	0.929221	0.880006	0.981188
finn-b-M13_ARTHROSIS_INCLAVO	cardiac function	Artrosis, including avohilmo || id:finn-b-M13_ARTHROSIS_INCLAVO	Inverse variance weighted	6	-0.0734091	0.027764	0.0081924	-0.127827	-0.0189916	0.929221	0.880006	0.981188
finn-b-M13_ARTHROSIS_KNEE	cardiac function	Gonarthrosis || id:finn-b-M13_ARTHROSIS_KNEE	Inverse variance weighted	6	-0.0350604	0.0317098	0.268871	-0.0972116	0.0270907	0.965547	0.907364	1.02746
finn-b-M13_ARTHROSIS_KNEE	cardiac function	Gonarthrosis || id:finn-b-M13_ARTHROSIS_KNEE	Inverse variance weighted	6	-0.0350604	0.0317098	0.268871	-0.0972116	0.0270907	0.965547	0.907364	1.02746
finn-b-M13_ARTHROSIS_KNEE_PRIM_ICD10	cardiac function	Gonarthrosis,primary || id:finn-b-M13_ARTHROSIS_KNEE_PRIM_ICD10	Inverse variance weighted	5	-0.0498782	0.0306505	0.103669	-0.109953	0.0101968	0.951345	0.895876	1.01025
finn-b-M13_ARTHROSIS_KNEE_PRIM_ICD10	cardiac function	Gonarthrosis,primary || id:finn-b-M13_ARTHROSIS_KNEE_PRIM_ICD10	Inverse variance weighted	5	-0.0498782	0.0306505	0.103669	-0.109953	0.0101968	0.951345	0.895876	1.01025
finn-b-M13_ARTHTROSIS_COX	cardiac function	Coxarthrosis, || id:finn-b-M13_ARTHTROSIS_COX	Inverse variance weighted	4	-0.0059658	0.0207247	0.773454	-0.0465862	0.0346546	0.994052	0.954482	1.03526
finn-b-M13_ARTHTROSIS_COX	cardiac function	Coxarthrosis, || id:finn-b-M13_ARTHTROSIS_COX	Inverse variance weighted	4	-0.0059658	0.0207247	0.773454	-0.0465862	0.0346546	0.994052	0.954482	1.03526
finn-b-M13_ARTHTROSIS_COX_PRIM_HIPSURG	cardiac function	Coxarthrosis, primary, with hip surgery || id:finn-b-M13_ARTHTROSIS_COX_PRIM_HIPSURG	Inverse variance weighted	4	-0.00779578	0.0139139	0.575284	-0.035067	0.0194755	0.992235	0.965541	1.01967
finn-b-M13_ARTHTROSIS_COX_PRIM_HIPSURG	cardiac function	Coxarthrosis, primary, with hip surgery || id:finn-b-M13_ARTHTROSIS_COX_PRIM_HIPSURG	Inverse variance weighted	4	-0.00779578	0.0139139	0.575284	-0.035067	0.0194755	0.992235	0.965541	1.01967
finn-b-M13_ARTHTROSIS_COX_PRIM_ICD10	cardiac function	Coxarthrosis, primary || id:finn-b-M13_ARTHTROSIS_COX_PRIM_ICD10	Inverse variance weighted	5	0.016317	0.0159927	0.307597	-0.0150288	0.0476628	1.01645	0.985084	1.04882
finn-b-M13_ARTHTROSIS_COX_PRIM_ICD10	cardiac function	Coxarthrosis, primary || id:finn-b-M13_ARTHTROSIS_COX_PRIM_ICD10	Inverse variance weighted	5	0.016317	0.0159927	0.307597	-0.0150288	0.0476628	1.01645	0.985084	1.04882
finn-b-M13_DUPUTRYEN	cardiac function	Palmar fascial fibromatosis [Dupuytren] || id:finn-b-M13_DUPUTRYEN	Inverse variance weighted	11	0.00373115	0.00342193	0.275553	-0.00297583	0.0104381	1.00374	0.997029	1.01049
finn-b-M13_DUPUTRYEN	cardiac function	Palmar fascial fibromatosis [Dupuytren] || id:finn-b-M13_DUPUTRYEN	Inverse variance weighted	11	0.00373115	0.00342193	0.275553	-0.00297583	0.0104381	1.00374	0.997029	1.01049
finn-b-M13_FIBROBLASTIC	cardiac function	Fibroblastic disorders || id:finn-b-M13_FIBROBLASTIC	Inverse variance weighted	8	0.00217958	0.00454757	0.631737	-0.00673366	0.0110928	1.00218	0.993289	1.01115
finn-b-M13_FIBROBLASTIC	cardiac function	Fibroblastic disorders || id:finn-b-M13_FIBROBLASTIC	Inverse variance weighted	8	0.00217958	0.00454757	0.631737	-0.00673366	0.0110928	1.00218	0.993289	1.01115
finn-b-M13_HALLUXVALGUS	cardiac function	Hallux valgus (acquired) || id:finn-b-M13_HALLUXVALGUS	Inverse variance weighted	4	-0.0257517	0.0136419	0.0590679	-0.0524898	0.000986476	0.974577	0.948864	1.00099
finn-b-M13_HALLUXVALGUS	cardiac function	Hallux valgus (acquired) || id:finn-b-M13_HALLUXVALGUS	Inverse variance weighted	4	-0.0257517	0.0136419	0.0590679	-0.0524898	0.000986476	0.974577	0.948864	1.00099
ebi-a-GCST003837	cardiac function	Chronotype || id:ebi-a-GCST003837	Inverse variance weighted	6	0.0226217	0.0643109	0.725022	-0.103428	0.148671	1.02288	0.901741	1.16029
finn-b-M13_POLYARTHROPATHIES	cardiac function	Polyarthropathies || id:finn-b-M13_POLYARTHROPATHIES	Inverse variance weighted	5	-0.00464428	0.0180818	0.797296	-0.0400847	0.0307961	0.995366	0.960708	1.03128
finn-b-M13_POLYARTHROPATHIES	cardiac function	Polyarthropathies || id:finn-b-M13_POLYARTHROPATHIES	Inverse variance weighted	5	-0.00464428	0.0180818	0.797296	-0.0400847	0.0307961	0.995366	0.960708	1.03128
finn-b-M13_RHEUMA	cardiac function	Rheumatoid arthritis (M13_RHEUMA) || id:finn-b-M13_RHEUMA	Inverse variance weighted	5	0.00106881	0.0101767	0.916356	-0.0188775	0.0210152	1.00107	0.9813	1.02124
finn-b-M13_RHEUMA	cardiac function	Rheumatoid arthritis (M13_RHEUMA) || id:finn-b-M13_RHEUMA	Inverse variance weighted	5	0.00106881	0.0101767	0.916356	-0.0188775	0.0210152	1.00107	0.9813	1.02124
finn-b-M13_RHEUMA_INCLAVO	cardiac function	Rheumatoid arthritis (M13_RHEUMA_INCLAVO) || id:finn-b-M13_RHEUMA_INCLAVO	Inverse variance weighted	6	0.00233326	0.00966917	0.809315	-0.0166183	0.0212848	1.00234	0.983519	1.02151
finn-b-M13_RHEUMA_INCLAVO	cardiac function	Rheumatoid arthritis (M13_RHEUMA_INCLAVO) || id:finn-b-M13_RHEUMA_INCLAVO	Inverse variance weighted	6	0.00233326	0.00966917	0.809315	-0.0166183	0.0212848	1.00234	0.983519	1.02151
finn-b-MIGRAINE_TRIPTAN	cardiac function	Migraine, single triptan purchase ok & required. ICD-code if available is included || id:finn-b-MIGRAINE_TRIPTAN	Inverse variance weighted	5	-0.0249353	0.0178644	0.162772	-0.0599496	0.0100789	0.975373	0.941812	1.01013
finn-b-MIGRAINE_TRIPTAN	cardiac function	Migraine, single triptan purchase ok & required. ICD-code if available is included || id:finn-b-MIGRAINE_TRIPTAN	Inverse variance weighted	5	-0.0249353	0.0178644	0.162772	-0.0599496	0.0100789	0.975373	0.941812	1.01013
finn-b-N14_CALCUKIDUR	cardiac function	Calculus of kidney and ureter || id:finn-b-N14_CALCUKIDUR	Inverse variance weighted	4	-0.0130789	0.0236686	0.580547	-0.0594693	0.0333115	0.987006	0.942264	1.03387
finn-b-N14_CALCUKIDUR	cardiac function	Calculus of kidney and ureter || id:finn-b-N14_CALCUKIDUR	Inverse variance weighted	4	-0.0130789	0.0236686	0.580547	-0.0594693	0.0333115	0.987006	0.942264	1.03387
finn-b-N14_ENDOMETRIOSIS	cardiac function	Endometriosis || id:finn-b-N14_ENDOMETRIOSIS	Inverse variance weighted	7	0.00346901	0.0103375	0.737192	-0.0167926	0.0237306	1.00348	0.983348	1.02401
finn-b-N14_ENDOMETRIOSIS	cardiac function	Endometriosis || id:finn-b-N14_ENDOMETRIOSIS	Inverse variance weighted	7	0.00346901	0.0103375	0.737192	-0.0167926	0.0237306	1.00348	0.983348	1.02401
finn-b-N14_ENDOMETRIOSIS_OVARY	cardiac function	Endometriosis of ovary || id:finn-b-N14_ENDOMETRIOSIS_OVARY	Inverse variance weighted	6	0.00555099	0.00815966	0.496317	-0.010442	0.0215439	1.00557	0.989612	1.02178
finn-b-N14_ENDOMETRIOSIS_OVARY	cardiac function	Endometriosis of ovary || id:finn-b-N14_ENDOMETRIOSIS_OVARY	Inverse variance weighted	6	0.00555099	0.00815966	0.496317	-0.010442	0.0215439	1.00557	0.989612	1.02178
finn-b-N14_ENDOMETRIOSIS_PELVICPERITONEUM	cardiac function	Endometriosis of pelvic peritoneum || id:finn-b-N14_ENDOMETRIOSIS_PELVICPERITONEUM	Inverse variance weighted	5	-0.00506414	0.00871348	0.561116	-0.0221426	0.0120143	0.994949	0.978101	1.01209
finn-b-N14_ENDOMETRIOSIS_PELVICPERITONEUM	cardiac function	Endometriosis of pelvic peritoneum || id:finn-b-N14_ENDOMETRIOSIS_PELVICPERITONEUM	Inverse variance weighted	5	-0.00506414	0.00871348	0.561116	-0.0221426	0.0120143	0.994949	0.978101	1.01209
finn-b-N14_FEMGENPROL	cardiac function	Female genital prolapse || id:finn-b-N14_FEMGENPROL	Inverse variance weighted	5	-0.0210614	0.0145056	0.146514	-0.0494923	0.00736944	0.979159	0.951712	1.0074
finn-b-N14_FEMGENPROL	cardiac function	Female genital prolapse || id:finn-b-N14_FEMGENPROL	Inverse variance weighted	5	-0.0210614	0.0145056	0.146514	-0.0494923	0.00736944	0.979159	0.951712	1.0074
finn-b-N14_HYPERTROPHYBREAST	cardiac function	Hypertrophy of breast || id:finn-b-N14_HYPERTROPHYBREAST	Inverse variance weighted	4	-0.00123224	0.00716488	0.863451	-0.0152754	0.0128109	0.998769	0.984841	1.01289
finn-b-N14_HYPERTROPHYBREAST	cardiac function	Hypertrophy of breast || id:finn-b-N14_HYPERTROPHYBREAST	Inverse variance weighted	4	-0.00123224	0.00716488	0.863451	-0.0152754	0.0128109	0.998769	0.984841	1.01289
finn-b-N14_PROSTHYPERPLA	cardiac function	Hyperplasia of prostate || id:finn-b-N14_PROSTHYPERPLA	Inverse variance weighted	7	0.00834692	0.017908	0.641144	-0.0267527	0.0434466	1.00838	0.973602	1.0444
finn-b-N14_PROSTHYPERPLA	cardiac function	Hyperplasia of prostate || id:finn-b-N14_PROSTHYPERPLA	Inverse variance weighted	7	0.00834692	0.017908	0.641144	-0.0267527	0.0434466	1.00838	0.973602	1.0444
finn-b-N14_UROLITHIASIS	cardiac function	Urolithiasis || id:finn-b-N14_UROLITHIASIS	Inverse variance weighted	4	-0.0138887	0.0239968	0.562742	-0.0609223	0.033145	0.986207	0.940896	1.0337
finn-b-N14_UROLITHIASIS	cardiac function	Urolithiasis || id:finn-b-N14_UROLITHIASIS	Inverse variance weighted	4	-0.0138887	0.0239968	0.562742	-0.0609223	0.033145	0.986207	0.940896	1.0337
finn-b-O15_HYPTENSPREG	cardiac function	Pregnancy hypertension || id:finn-b-O15_HYPTENSPREG	Inverse variance weighted	4	0.00629104	0.0228927	0.783466	-0.0385787	0.0511607	1.00631	0.962156	1.05249
finn-b-O15_HYPTENSPREG	cardiac function	Pregnancy hypertension || id:finn-b-O15_HYPTENSPREG	Inverse variance weighted	4	0.00629104	0.0228927	0.783466	-0.0385787	0.0511607	1.00631	0.962156	1.05249
finn-b-O15_ICP_WIDE	cardiac function	Intrahepatic Cholestasis of Pregnancy (ICP)<c3><8a>, incl. ICD-8 || id:finn-b-O15_ICP_WIDE	Inverse variance weighted	5	-0.00215411	0.00508781	0.672014	-0.0121262	0.007818	0.997848	0.987947	1.00785
finn-b-O15_ICP_WIDE	cardiac function	Intrahepatic Cholestasis of Pregnancy (ICP)<c3><8a>, incl. ICD-8 || id:finn-b-O15_ICP_WIDE	Inverse variance weighted	5	-0.00215411	0.00508781	0.672014	-0.0121262	0.007818	0.997848	0.987947	1.00785
finn-b-OPER_ARTIF_JOINT_MENISC_RESECT	cardiac function	Articial joint operation, menisceal resection || id:finn-b-OPER_ARTIF_JOINT_MENISC_RESECT	Inverse variance weighted	4	-0.0904762	0.0260524	0.00051494	-0.141539	-0.0394136	0.913496	0.868021	0.961353
finn-b-OPER_ARTIF_JOINT_MENISC_RESECT	cardiac function	Articial joint operation, menisceal resection || id:finn-b-OPER_ARTIF_JOINT_MENISC_RESECT	Inverse variance weighted	4	-0.0904762	0.0260524	0.00051494	-0.141539	-0.0394136	0.913496	0.868021	0.961353
finn-b-PAIN	cardiac function	Pain (limb, back, neck, head abdominally) || id:finn-b-PAIN	Inverse variance weighted	4	-0.0329787	0.0449789	0.463434	-0.121137	0.0551799	0.967559	0.885912	1.05673
finn-b-PAIN	cardiac function	Pain (limb, back, neck, head abdominally) || id:finn-b-PAIN	Inverse variance weighted	4	-0.0329787	0.0449789	0.463434	-0.121137	0.0551799	0.967559	0.885912	1.05673
finn-b-PRIM_KNEEARTHROSIS	cardiac function	Primary gonarthrosis, bilateral || id:finn-b-PRIM_KNEEARTHROSIS	Inverse variance weighted	3	-0.0660757	0.0190049	0.000507478	-0.103325	-0.0288262	0.93606	0.901834	0.971585
finn-b-PRIM_KNEEARTHROSIS	cardiac function	Primary gonarthrosis, bilateral || id:finn-b-PRIM_KNEEARTHROSIS	Inverse variance weighted	3	-0.0660757	0.0190049	0.000507478	-0.103325	-0.0288262	0.93606	0.901834	0.971585
ebi-a-GCST004074	cardiac function	Intraocular pressure || id:ebi-a-GCST004074	Inverse variance weighted	6	0.0014872	0.00952875	0.875974	-0.0171891	0.0201636	1.00149	0.982958	1.02037
finn-b-RHEUMA_SEROPOS	cardiac function	Seropositive rheumatoid arthritis || id:finn-b-RHEUMA_SEROPOS	Inverse variance weighted	3	0.000405419	0.00988619	0.967289	-0.0189715	0.0197824	1.00041	0.981207	1.01998
finn-b-RHEUMA_SEROPOS	cardiac function	Seropositive rheumatoid arthritis || id:finn-b-RHEUMA_SEROPOS	Inverse variance weighted	3	0.000405419	0.00988619	0.967289	-0.0189715	0.0197824	1.00041	0.981207	1.01998
finn-b-RX_ANTIHYP	cardiac function	Antihypertensive medication - note that there are other indications || id:finn-b-RX_ANTIHYP	Inverse variance weighted	26	-0.00597874	0.0201576	0.766772	-0.0454877	0.0335302	0.994039	0.955531	1.0341
finn-b-RX_ANTIHYP	cardiac function	Antihypertensive medication - note that there are other indications || id:finn-b-RX_ANTIHYP	Inverse variance weighted	26	-0.00597874	0.0201576	0.766772	-0.0454877	0.0335302	0.994039	0.955531	1.0341
finn-b-RX_CROHN_2NDLINE	cardiac function	Second line medication for Crohns disease || id:finn-b-RX_CROHN_2NDLINE	Inverse variance weighted	5	0.0201314	0.0163804	0.219074	-0.0119741	0.0522369	1.02034	0.988097	1.05363
finn-b-RX_CROHN_2NDLINE	cardiac function	Second line medication for Crohns disease || id:finn-b-RX_CROHN_2NDLINE	Inverse variance weighted	5	0.0201314	0.0163804	0.219074	-0.0119741	0.0522369	1.02034	0.988097	1.05363
finn-b-RX_STATIN	cardiac function	Statin medication || id:finn-b-RX_STATIN	Inverse variance weighted	32	-0.000678966	0.00534201	0.898862	-0.0111493	0.00979136	0.999321	0.988913	1.00984
finn-b-RX_STATIN	cardiac function	Statin medication || id:finn-b-RX_STATIN	Inverse variance weighted	32	-0.000678966	0.00534201	0.898862	-0.0111493	0.00979136	0.999321	0.988913	1.00984
finn-b-ST19_FRACT_FOREA	cardiac function	Fracture of forearm || id:finn-b-ST19_FRACT_FOREA	Inverse variance weighted	7	0.00187838	0.0170209	0.912126	-0.0314825	0.0352393	1.00188	0.969008	1.03587
finn-b-ST19_FRACT_FOREA	cardiac function	Fracture of forearm || id:finn-b-ST19_FRACT_FOREA	Inverse variance weighted	7	0.00187838	0.0170209	0.912126	-0.0314825	0.0352393	1.00188	0.969008	1.03587
finn-b-ST19_INJURI_ELBOW_FOREA	cardiac function	Injuries to the elbow and forearm || id:finn-b-ST19_INJURI_ELBOW_FOREA	Inverse variance weighted	4	0.0227394	0.0175883	0.196057	-0.0117337	0.0572124	1.023	0.988335	1.05888
finn-b-ST19_INJURI_ELBOW_FOREA	cardiac function	Injuries to the elbow and forearm || id:finn-b-ST19_INJURI_ELBOW_FOREA	Inverse variance weighted	4	0.0227394	0.0175883	0.196057	-0.0117337	0.0572124	1.023	0.988335	1.05888
ebi-a-GCST004075	cardiac function	Vertical cup-disc ratio || id:ebi-a-GCST004075	Inverse variance weighted	11	-0.194298	0.0996734	0.0512538	-0.389658	0.00106166	0.823412	0.677288	1.00106
finn-b-T1D_WIDE	cardiac function	Type 1 diabetes, wide definition || id:finn-b-T1D_WIDE	Inverse variance weighted	4	0.0139102	0.0103209	0.17773	-0.00631866	0.0341391	1.01401	0.993701	1.03473
finn-b-T1D_WIDE	cardiac function	Type 1 diabetes, wide definition || id:finn-b-T1D_WIDE	Inverse variance weighted	4	0.0139102	0.0103209	0.17773	-0.00631866	0.0341391	1.01401	0.993701	1.03473
finn-b-T1D_WIDE1	cardiac function	Type 1 diabetes, wide definition, subgroup 1 || id:finn-b-T1D_WIDE1	Inverse variance weighted	4	0.00723269	0.00953351	0.448056	-0.011453	0.0259184	1.00726	0.988612	1.02626
finn-b-T1D_WIDE1	cardiac function	Type 1 diabetes, wide definition, subgroup 1 || id:finn-b-T1D_WIDE1	Inverse variance weighted	4	0.00723269	0.00953351	0.448056	-0.011453	0.0259184	1.00726	0.988612	1.02626
finn-b-T2D	cardiac function	Type 2 diabetes, definitions combined || id:finn-b-T2D	Inverse variance weighted	30	-0.00733688	0.00902941	0.416474	-0.0250345	0.0103608	0.99269	0.975276	1.01041
finn-b-T2D	cardiac function	Type 2 diabetes, definitions combined || id:finn-b-T2D	Inverse variance weighted	30	-0.00733688	0.00902941	0.416474	-0.0250345	0.0103608	0.99269	0.975276	1.01041
finn-b-T2D_INCLAVO	cardiac function	Type 2 diabetes, definitions combined, including avohilmo || id:finn-b-T2D_INCLAVO	Inverse variance weighted	32	-0.0153167	0.00816771	0.0607553	-0.0313254	0.000692033	0.9848	0.96916	1.00069
finn-b-T2D_INCLAVO	cardiac function	Type 2 diabetes, definitions combined, including avohilmo || id:finn-b-T2D_INCLAVO	Inverse variance weighted	32	-0.0153167	0.00816771	0.0607553	-0.0313254	0.000692033	0.9848	0.96916	1.00069
finn-b-T2D_WIDE	cardiac function	Type 2 diabetes, wide definition || id:finn-b-T2D_WIDE	Inverse variance weighted	15	0.00114715	0.0105771	0.913634	-0.019584	0.0218782	1.00115	0.980607	1.02212
finn-b-T2D_WIDE	cardiac function	Type 2 diabetes, wide definition || id:finn-b-T2D_WIDE	Inverse variance weighted	15	0.00114715	0.0105771	0.913634	-0.019584	0.0218782	1.00115	0.980607	1.02212
finn-b-THYROID_DISORDER_IBD	cardiac function	Disorders of thyroid, IBD co-morbidities || id:finn-b-THYROID_DISORDER_IBD	Inverse variance weighted	4	0.0220936	0.00923533	0.0167436	0.00399234	0.0401948	1.02234	1.004	1.04101
finn-b-THYROID_DISORDER_IBD	cardiac function	Disorders of thyroid, IBD co-morbidities || id:finn-b-THYROID_DISORDER_IBD	Inverse variance weighted	4	0.0220936	0.00923533	0.0167436	0.00399234	0.0401948	1.02234	1.004	1.04101
finn-b-THYROTOXICOSIS	cardiac function	Thyrotoxicosis || id:finn-b-THYROTOXICOSIS	Inverse variance weighted	5	0.003545	0.0144575	0.806301	-0.0247918	0.0318818	1.00355	0.975513	1.0324
finn-b-THYROTOXICOSIS	cardiac function	Thyrotoxicosis || id:finn-b-THYROTOXICOSIS	Inverse variance weighted	5	0.003545	0.0144575	0.806301	-0.0247918	0.0318818	1.00355	0.975513	1.0324
finn-b-WET_AMD	cardiac function	Wet age-related macular degeneration || id:finn-b-WET_AMD	Inverse variance weighted	4	-0.00270283	0.0031016	0.38352	-0.00878196	0.00337631	0.997301	0.991256	1.00338
finn-b-WET_AMD	cardiac function	Wet age-related macular degeneration || id:finn-b-WET_AMD	Inverse variance weighted	4	-0.00270283	0.0031016	0.38352	-0.00878196	0.00337631	0.997301	0.991256	1.00338
ebi-a-GCST004076	cardiac function	Optic disc area || id:ebi-a-GCST004076	Inverse variance weighted	9	-0.0370744	0.0264851	0.161567	-0.0889853	0.0148365	0.963604	0.914859	1.01495
ieu-a-1	cardiac function	Adiponectin || id:ieu-a-1	Inverse variance weighted	9	0.0861091	0.0326213	0.00829886	0.0221715	0.150047	1.08993	1.02242	1.16189
ieu-a-1	cardiac function	Adiponectin || id:ieu-a-1	Inverse variance weighted	9	0.0861091	0.0326213	0.00829886	0.0221715	0.150047	1.08993	1.02242	1.16189
ieu-a-10	cardiac function	Crohn's disease || id:ieu-a-10	Inverse variance weighted	86	-0.00507648	0.00311414	0.103073	-0.0111802	0.00102724	0.994936	0.988882	1.00103
ieu-a-10	cardiac function	Crohn's disease || id:ieu-a-10	Inverse variance weighted	86	-0.00507648	0.00311414	0.103073	-0.0111802	0.00102724	0.994936	0.988882	1.00103
ieu-a-1001	cardiac function	Years of schooling || id:ieu-a-1001	Inverse variance weighted	39	0.0261761	0.0346659	0.450191	-0.0417691	0.0941214	1.02652	0.959091	1.09869
ieu-a-1001	cardiac function	Years of schooling || id:ieu-a-1001	Inverse variance weighted	39	0.0261761	0.0346659	0.450191	-0.0417691	0.0941214	1.02652	0.959091	1.09869
ieu-a-1004	cardiac function	Age at menopause || id:ieu-a-1004	Inverse variance weighted	31	-0.00231842	0.00338576	0.493496	-0.00895451	0.00431766	0.997684	0.991085	1.00433
ieu-a-1004	cardiac function	Age at menopause || id:ieu-a-1004	Inverse variance weighted	31	-0.00231842	0.00338576	0.493496	-0.00895451	0.00431766	0.997684	0.991085	1.00433
ieu-a-1006	cardiac function	Mean platelet volume || id:ieu-a-1006	Inverse variance weighted	20	-0.14878	0.101712	0.143535	-0.348137	0.0505762	0.861759	0.706002	1.05188
ieu-a-1006	cardiac function	Mean platelet volume || id:ieu-a-1006	Inverse variance weighted	20	-0.14878	0.101712	0.143535	-0.348137	0.0505762	0.861759	0.706002	1.05188
ieu-a-1007	cardiac function	Neuroticism || id:ieu-a-1007	Inverse variance weighted	8	-0.0681454	0.0936059	0.466612	-0.251613	0.115322	0.934125	0.777546	1.12223
ieu-a-1007	cardiac function	Neuroticism || id:ieu-a-1007	Inverse variance weighted	8	-0.0681454	0.0936059	0.466612	-0.251613	0.115322	0.934125	0.777546	1.12223
ieu-a-1008	cardiac function	Platelet count || id:ieu-a-1008	Inverse variance weighted	22	0.000307186	0.000268397	0.252407	-0.000218871	0.000833244	1.00031	0.999781	1.00083
ieu-a-1008	cardiac function	Platelet count || id:ieu-a-1008	Inverse variance weighted	22	0.000307186	0.000268397	0.252407	-0.000218871	0.000833244	1.00031	0.999781	1.00083
ieu-a-101	cardiac function	Hip circumference || id:ieu-a-101	Inverse variance weighted	3	-0.031839	0.0455627	0.48468	-0.121142	0.057464	0.968663	0.885908	1.05915
ieu-a-101	cardiac function	Hip circumference || id:ieu-a-101	Inverse variance weighted	3	-0.031839	0.0455627	0.48468	-0.121142	0.057464	0.968663	0.885908	1.05915
ieu-a-1010	cardiac function	Years of schooling || id:ieu-a-1010	Inverse variance weighted	8	-0.093203	0.0546023	0.0878328	-0.200223	0.0138175	0.911009	0.818548	1.01391
ieu-a-1010	cardiac function	Years of schooling || id:ieu-a-1010	Inverse variance weighted	8	-0.093203	0.0546023	0.0878328	-0.200223	0.0138175	0.911009	0.818548	1.01391
ieu-a-1011	cardiac function	Years of schooling || id:ieu-a-1011	Inverse variance weighted	12	-0.0111138	0.0804488	0.890124	-0.168793	0.146566	0.988948	0.844683	1.15785
ieu-a-1011	cardiac function	Years of schooling || id:ieu-a-1011	Inverse variance weighted	12	-0.0111138	0.0804488	0.890124	-0.168793	0.146566	0.988948	0.844683	1.15785
ieu-a-1024	cardiac function	Multiple sclerosis || id:ieu-a-1024	Inverse variance weighted	18	-0.0104744	0.00818869	0.20085	-0.0265243	0.0055754	0.98958	0.973824	1.00559
ieu-a-1024	cardiac function	Multiple sclerosis || id:ieu-a-1024	Inverse variance weighted	18	-0.0104744	0.00818869	0.20085	-0.0265243	0.0055754	0.98958	0.973824	1.00559
ieu-a-1025	cardiac function	Multiple sclerosis || id:ieu-a-1025	Inverse variance weighted	29	0.00255839	0.00578767	0.658459	-0.00878544	0.0139022	1.00256	0.991253	1.014
ieu-a-1025	cardiac function	Multiple sclerosis || id:ieu-a-1025	Inverse variance weighted	29	0.00255839	0.00578767	0.658459	-0.00878544	0.0139022	1.00256	0.991253	1.014
ieu-a-1034	cardiac function	Height || id:ieu-a-1034	Inverse variance weighted	4	-0.027373	0.0246844	0.267465	-0.0757544	0.0210084	0.972998	0.927044	1.02123
ieu-a-1034	cardiac function	Height || id:ieu-a-1034	Inverse variance weighted	4	-0.027373	0.0246844	0.267465	-0.0757544	0.0210084	0.972998	0.927044	1.02123
ieu-a-105	cardiac function	Waist circumference || id:ieu-a-105	Inverse variance weighted	4	-0.0628723	0.0950447	0.50829	-0.24916	0.123415	0.939063	0.779455	1.13135
ieu-a-105	cardiac function	Waist circumference || id:ieu-a-105	Inverse variance weighted	4	-0.0628723	0.0950447	0.50829	-0.24916	0.123415	0.939063	0.779455	1.13135
ieu-a-1052	cardiac function	Transferrin || id:ieu-a-1052	Inverse variance weighted	5	-0.00287458	0.0123505	0.815955	-0.0270815	0.0213324	0.99713	0.973282	1.02156
ieu-a-1052	cardiac function	Transferrin || id:ieu-a-1052	Inverse variance weighted	5	-0.00287458	0.0123505	0.815955	-0.0270815	0.0213324	0.99713	0.973282	1.02156
ieu-a-1055	cardiac function	Urate || id:ieu-a-1055	Inverse variance weighted	19	-0.0166473	0.0152415	0.274727	-0.0465206	0.0132259	0.98349	0.954545	1.01331
ebi-a-GCST004131	cardiac function	Inflammatory bowel disease || id:ebi-a-GCST004131	Inverse variance weighted	66	0.000948434	0.0039016	0.807937	-0.0066987	0.00859557	1.00095	0.993324	1.00863
ieu-a-1055	cardiac function	Urate || id:ieu-a-1055	Inverse variance weighted	19	-0.0166473	0.0152415	0.274727	-0.0465206	0.0132259	0.98349	0.954545	1.01331
ieu-a-1056	cardiac function	Heart rate || id:ieu-a-1056	Inverse variance weighted	15	-0.0211883	0.00268181	2.77209e-15	-0.0264447	-0.015932	0.979035	0.973902	0.984194
ieu-a-1056	cardiac function	Heart rate || id:ieu-a-1056	Inverse variance weighted	15	-0.0211883	0.00268181	2.77209e-15	-0.0264447	-0.015932	0.979035	0.973902	0.984194
ieu-a-1058	cardiac function	Celiac disease || id:ieu-a-1058	Inverse variance weighted	8	-0.00881424	0.00905689	0.33045	-0.0265657	0.00893727	0.991224	0.973784	1.00898
ieu-a-1058	cardiac function	Celiac disease || id:ieu-a-1058	Inverse variance weighted	8	-0.00881424	0.00905689	0.33045	-0.0265657	0.00893727	0.991224	0.973784	1.00898
ieu-a-1059	cardiac function	Celiac disease || id:ieu-a-1059	Inverse variance weighted	7	0.00253035	0.00664242	0.703249	-0.0104888	0.0155495	1.00253	0.989566	1.01567
ieu-a-1059	cardiac function	Celiac disease || id:ieu-a-1059	Inverse variance weighted	7	0.00253035	0.00664242	0.703249	-0.0104888	0.0155495	1.00253	0.989566	1.01567
ieu-a-106	cardiac function	Weight || id:ieu-a-106	Inverse variance weighted	8	-0.0371915	0.0461451	0.420261	-0.127636	0.0532529	0.963492	0.880174	1.0547
ieu-a-106	cardiac function	Weight || id:ieu-a-106	Inverse variance weighted	8	-0.0371915	0.0461451	0.420261	-0.127636	0.0532529	0.963492	0.880174	1.0547
ieu-a-1060	cardiac function	Celiac disease || id:ieu-a-1060	Inverse variance weighted	6	0.00242808	0.0074256	0.743677	-0.0121261	0.0169823	1.00243	0.987947	1.01713
ieu-a-1060	cardiac function	Celiac disease || id:ieu-a-1060	Inverse variance weighted	6	0.00242808	0.0074256	0.743677	-0.0121261	0.0169823	1.00243	0.987947	1.01713
ieu-a-107	cardiac function	Weight || id:ieu-a-107	Inverse variance weighted	9	-0.0884864	0.0272547	0.00116774	-0.141906	-0.0350671	0.915316	0.867703	0.965541
ieu-a-107	cardiac function	Weight || id:ieu-a-107	Inverse variance weighted	9	-0.0884864	0.0272547	0.00116774	-0.141906	-0.0350671	0.915316	0.867703	0.965541
ieu-a-1082	cardiac function	Thyroid cancer || id:ieu-a-1082	Inverse variance weighted	212	0.000228744	0.000220672	0.299932	-0.000203773	0.000661261	1.00023	0.999796	1.00066
ieu-a-1082	cardiac function	Thyroid cancer || id:ieu-a-1082	Inverse variance weighted	212	0.000228744	0.000220672	0.299932	-0.000203773	0.000661261	1.00023	0.999796	1.00066
ieu-a-1083	cardiac function	Birth weight || id:ieu-a-1083	Inverse variance weighted	27	-0.0205128	0.0319067	0.520289	-0.08305	0.0420243	0.979696	0.920305	1.04292
ieu-a-1083	cardiac function	Birth weight || id:ieu-a-1083	Inverse variance weighted	27	-0.0205128	0.0319067	0.520289	-0.08305	0.0420243	0.979696	0.920305	1.04292
ieu-a-1085	cardiac function	Amyotrophic lateral sclerosis || id:ieu-a-1085	Inverse variance weighted	5	-0.0342374	0.0639946	0.592647	-0.159667	0.091192	0.966342	0.852428	1.09548
ieu-a-1085	cardiac function	Amyotrophic lateral sclerosis || id:ieu-a-1085	Inverse variance weighted	5	-0.0342374	0.0639946	0.592647	-0.159667	0.091192	0.966342	0.852428	1.09548
ieu-a-1087	cardiac function	Chronotype || id:ieu-a-1087	Inverse variance weighted	6	0.0226217	0.0643109	0.725022	-0.103428	0.148671	1.02288	0.901741	1.16029
ieu-a-1087	cardiac function	Chronotype || id:ieu-a-1087	Inverse variance weighted	6	0.0226217	0.0643109	0.725022	-0.103428	0.148671	1.02288	0.901741	1.16029
ieu-a-109	cardiac function	Waist-to-hip ratio || id:ieu-a-109	Inverse variance weighted	5	-0.0620879	0.0461855	0.178846	-0.152612	0.0284357	0.9398	0.858463	1.02884
ieu-a-109	cardiac function	Waist-to-hip ratio || id:ieu-a-109	Inverse variance weighted	5	-0.0620879	0.0461855	0.178846	-0.152612	0.0284357	0.9398	0.858463	1.02884
ieu-a-1095	cardiac function	Age at menarche || id:ieu-a-1095	Inverse variance weighted	42	0.0229037	0.0154576	0.138418	-0.00739326	0.0532006	1.02317	0.992634	1.05464
ieu-a-1095	cardiac function	Age at menarche || id:ieu-a-1095	Inverse variance weighted	42	0.0229037	0.0154576	0.138418	-0.00739326	0.0532006	1.02317	0.992634	1.05464
ieu-a-1096	cardiac function	Childhood obesity || id:ieu-a-1096	Inverse variance weighted	4	-0.0267277	0.0114752	0.0198501	-0.0492191	-0.0042363	0.973626	0.951972	0.995773
ieu-a-1096	cardiac function	Childhood obesity || id:ieu-a-1096	Inverse variance weighted	4	-0.0267277	0.0114752	0.0198501	-0.0492191	-0.0042363	0.973626	0.951972	0.995773
ieu-a-11	cardiac function	Crohn's disease || id:ieu-a-11	Inverse variance weighted	4	-0.000769752	0.00497464	0.87703	-0.01052	0.00898054	0.999231	0.989535	1.00902
ieu-a-11	cardiac function	Crohn's disease || id:ieu-a-11	Inverse variance weighted	4	-0.000769752	0.00497464	0.87703	-0.01052	0.00898054	0.999231	0.989535	1.00902
ieu-a-1104	cardiac function	Serum creatinine (eGFRcrea) || id:ieu-a-1104	Inverse variance weighted	32	-0.0439087	0.103381	0.671035	-0.246535	0.158718	0.957041	0.781504	1.17201
ieu-a-1104	cardiac function	Serum creatinine (eGFRcrea) || id:ieu-a-1104	Inverse variance weighted	32	-0.0439087	0.103381	0.671035	-0.246535	0.158718	0.957041	0.781504	1.17201
ieu-a-1105	cardiac function	Serum creatinine (eGFRcrea) || id:ieu-a-1105	Inverse variance weighted	31	-0.0170838	0.0915003	0.85189	-0.196424	0.162257	0.983061	0.821663	1.17616
ieu-a-1105	cardiac function	Serum creatinine (eGFRcrea) || id:ieu-a-1105	Inverse variance weighted	31	-0.0170838	0.0915003	0.85189	-0.196424	0.162257	0.983061	0.821663	1.17616
ieu-a-1106	cardiac function	Serum cystatin C (eGFRcys) || id:ieu-a-1106	Inverse variance weighted	4	0.00278605	0.0544338	0.95918	-0.103904	0.109476	1.00279	0.901312	1.11569
ieu-a-1106	cardiac function	Serum cystatin C (eGFRcys) || id:ieu-a-1106	Inverse variance weighted	4	0.00278605	0.0544338	0.95918	-0.103904	0.109476	1.00279	0.901312	1.11569
ieu-a-111	cardiac function	Waist-to-hip ratio || id:ieu-a-111	Inverse variance weighted	9	-0.0434597	0.0250092	0.0822557	-0.0924777	0.00555841	0.957471	0.91167	1.00557
ieu-a-111	cardiac function	Waist-to-hip ratio || id:ieu-a-111	Inverse variance weighted	9	-0.0434597	0.0250092	0.0822557	-0.0924777	0.00555841	0.957471	0.91167	1.00557
ieu-a-1112	cardiac function	Primary sclerosing cholangitis || id:ieu-a-1112	Inverse variance weighted	8	-0.00338874	0.00803959	0.673385	-0.0191463	0.0123689	0.996617	0.981036	1.01245
ieu-a-1112	cardiac function	Primary sclerosing cholangitis || id:ieu-a-1112	Inverse variance weighted	8	-0.00338874	0.00803959	0.673385	-0.0191463	0.0123689	0.996617	0.981036	1.01245
ieu-a-1120	cardiac function	Ovarian cancer || id:ieu-a-1120	Inverse variance weighted	6	-0.00871062	0.0160737	0.587874	-0.040215	0.0227938	0.991327	0.960583	1.02306
ieu-a-1120	cardiac function	Ovarian cancer || id:ieu-a-1120	Inverse variance weighted	6	-0.00871062	0.0160737	0.587874	-0.040215	0.0227938	0.991327	0.960583	1.02306
ieu-a-1121	cardiac function	High grade serous ovarian cancer || id:ieu-a-1121	Inverse variance weighted	7	-0.0112986	0.015013	0.451697	-0.0407242	0.0181269	0.988765	0.960094	1.01829
ieu-a-1121	cardiac function	High grade serous ovarian cancer || id:ieu-a-1121	Inverse variance weighted	7	-0.0112986	0.015013	0.451697	-0.0407242	0.0181269	0.988765	0.960094	1.01829
ieu-a-1126	cardiac function	Breast cancer (Combined Oncoarray; iCOGS; GWAS meta analysis) || id:ieu-a-1126	Inverse variance weighted	74	0.00400562	0.00682042	0.557003	-0.00936239	0.0173736	1.00401	0.990681	1.01753
ieu-a-1126	cardiac function	Breast cancer (Combined Oncoarray; iCOGS; GWAS meta analysis) || id:ieu-a-1126	Inverse variance weighted	74	0.00400562	0.00682042	0.557003	-0.00936239	0.0173736	1.00401	0.990681	1.01753
ieu-a-1127	cardiac function	ER+ Breast cancer (Combined Oncoarray; iCOGS; GWAS meta analysis) || id:ieu-a-1127	Inverse variance weighted	54	0.0023168	0.00611193	0.704642	-0.00966259	0.0142962	1.00232	0.990384	1.0144
ieu-a-1127	cardiac function	ER+ Breast cancer (Combined Oncoarray; iCOGS; GWAS meta analysis) || id:ieu-a-1127	Inverse variance weighted	54	0.0023168	0.00611193	0.704642	-0.00966259	0.0142962	1.00232	0.990384	1.0144
ieu-a-1128	cardiac function	ER- Breast cancer (Combined Oncoarray; iCOGS; GWAS meta analysis) || id:ieu-a-1128	Inverse variance weighted	19	0.00991239	0.00986112	0.314801	-0.0094154	0.0292402	1.00996	0.990629	1.02967
ebi-a-GCST004132	cardiac function	Crohn's disease || id:ebi-a-GCST004132	Inverse variance weighted	51	-0.00336109	0.00346822	0.332489	-0.0101588	0.00343662	0.996645	0.989893	1.00344
ieu-a-1128	cardiac function	ER- Breast cancer (Combined Oncoarray; iCOGS; GWAS meta analysis) || id:ieu-a-1128	Inverse variance weighted	19	0.00991239	0.00986112	0.314801	-0.0094154	0.0292402	1.00996	0.990629	1.02967
ieu-a-1129	cardiac function	Breast cancer (Oncoarray) || id:ieu-a-1129	Inverse variance weighted	36	-0.00117794	0.00721549	0.870321	-0.0153203	0.0129644	0.998823	0.984796	1.01305
ieu-a-1129	cardiac function	Breast cancer (Oncoarray) || id:ieu-a-1129	Inverse variance weighted	36	-0.00117794	0.00721549	0.870321	-0.0153203	0.0129644	0.998823	0.984796	1.01305
ieu-a-1130	cardiac function	Breast cancer (iCOGS) || id:ieu-a-1130	Inverse variance weighted	23	0.0114921	0.00824134	0.163182	-0.0046609	0.0276451	1.01156	0.99535	1.02803
ieu-a-1130	cardiac function	Breast cancer (iCOGS) || id:ieu-a-1130	Inverse variance weighted	23	0.0114921	0.00824134	0.163182	-0.0046609	0.0276451	1.01156	0.99535	1.02803
ieu-a-1131	cardiac function	Breast cancer (GWAS) || id:ieu-a-1131	Inverse variance weighted	12	0.00137664	0.00752182	0.854783	-0.0133661	0.0161194	1.00138	0.986723	1.01625
ieu-a-1131	cardiac function	Breast cancer (GWAS) || id:ieu-a-1131	Inverse variance weighted	12	0.00137664	0.00752182	0.854783	-0.0133661	0.0161194	1.00138	0.986723	1.01625
ieu-a-1132	cardiac function	ER+ Breast cancer (Oncoarray) || id:ieu-a-1132	Inverse variance weighted	31	0.00120057	0.00724185	0.868329	-0.0129935	0.0153946	1.0012	0.987091	1.01551
ieu-a-1132	cardiac function	ER+ Breast cancer (Oncoarray) || id:ieu-a-1132	Inverse variance weighted	31	0.00120057	0.00724185	0.868329	-0.0129935	0.0153946	1.0012	0.987091	1.01551
ieu-a-1133	cardiac function	ER+ Breast cancer (iCOGS) || id:ieu-a-1133	Inverse variance weighted	24	0.00778338	0.00733746	0.288793	-0.00659804	0.0221648	1.00781	0.993424	1.02241
ieu-a-1133	cardiac function	ER+ Breast cancer (iCOGS) || id:ieu-a-1133	Inverse variance weighted	24	0.00778338	0.00733746	0.288793	-0.00659804	0.0221648	1.00781	0.993424	1.02241
ieu-a-1134	cardiac function	ER+ Breast cancer (GWAS) || id:ieu-a-1134	Inverse variance weighted	5	-0.0082126	0.00713062	0.249429	-0.0221886	0.00576341	0.991821	0.978056	1.00578
ieu-a-1134	cardiac function	ER+ Breast cancer (GWAS) || id:ieu-a-1134	Inverse variance weighted	5	-0.0082126	0.00713062	0.249429	-0.0221886	0.00576341	0.991821	0.978056	1.00578
ieu-a-1135	cardiac function	ER- Breast cancer (Oncoarray) || id:ieu-a-1135	Inverse variance weighted	5	0.00745126	0.0122335	0.542466	-0.0165264	0.0314289	1.00748	0.983609	1.03193
ieu-a-1135	cardiac function	ER- Breast cancer (Oncoarray) || id:ieu-a-1135	Inverse variance weighted	5	0.00745126	0.0122335	0.542466	-0.0165264	0.0314289	1.00748	0.983609	1.03193
ieu-a-1160	cardiac function	ER- Breast cancer (iCOGS) || id:ieu-a-1160	Inverse variance weighted	5	-0.00167076	0.0117112	0.886556	-0.0246248	0.0212833	0.998331	0.975676	1.02151
ieu-a-1160	cardiac function	ER- Breast cancer (iCOGS) || id:ieu-a-1160	Inverse variance weighted	5	-0.00167076	0.0117112	0.886556	-0.0246248	0.0212833	0.998331	0.975676	1.02151
ieu-a-1161	cardiac function	ER+ Breast cancer (iCOGS) || id:ieu-a-1161	Inverse variance weighted	28	0.00214751	0.00775592	0.781867	-0.0130541	0.0173491	1.00215	0.987031	1.0175
ieu-a-1161	cardiac function	ER+ Breast cancer (iCOGS) || id:ieu-a-1161	Inverse variance weighted	28	0.00214751	0.00775592	0.781867	-0.0130541	0.0173491	1.00215	0.987031	1.0175
ieu-a-1162	cardiac function	Breast cancer (iCOGS) || id:ieu-a-1162	Inverse variance weighted	31	0.00765654	0.00815379	0.347722	-0.00832489	0.023638	1.00769	0.99171	1.02392
ieu-a-1162	cardiac function	Breast cancer (iCOGS) || id:ieu-a-1162	Inverse variance weighted	31	0.00765654	0.00815379	0.347722	-0.00832489	0.023638	1.00769	0.99171	1.02392
ieu-a-1166	cardiac function	ER- Breast cancer (GWAS) || id:ieu-a-1166	Inverse variance weighted	5	0.00247683	0.0148349	0.867402	-0.0265995	0.0315532	1.00248	0.973751	1.03206
ieu-a-1166	cardiac function	ER- Breast cancer (GWAS) || id:ieu-a-1166	Inverse variance weighted	5	0.00247683	0.0148349	0.867402	-0.0265995	0.0315532	1.00248	0.973751	1.03206
ieu-a-1167	cardiac function	ER+ Breast cancer (GWAS) || id:ieu-a-1167	Inverse variance weighted	27	0.00915201	0.00695097	0.187955	-0.00447188	0.0227759	1.00919	0.995538	1.02304
ieu-a-1167	cardiac function	ER+ Breast cancer (GWAS) || id:ieu-a-1167	Inverse variance weighted	27	0.00915201	0.00695097	0.187955	-0.00447188	0.0227759	1.00919	0.995538	1.02304
ieu-a-1168	cardiac function	Breast cancer (GWAS) || id:ieu-a-1168	Inverse variance weighted	29	0.0113903	0.00763718	0.135849	-0.00357857	0.0263592	1.01146	0.996428	1.02671
ieu-a-1168	cardiac function	Breast cancer (GWAS) || id:ieu-a-1168	Inverse variance weighted	29	0.0113903	0.00763718	0.135849	-0.00357857	0.0263592	1.01146	0.996428	1.02671
ieu-a-1183	cardiac function	ADHD || id:ieu-a-1183	Inverse variance weighted	6	-0.0109886	0.0181599	0.545111	-0.046582	0.0246048	0.989072	0.954486	1.02491
ieu-a-1183	cardiac function	ADHD || id:ieu-a-1183	Inverse variance weighted	6	-0.0109886	0.0181599	0.545111	-0.046582	0.0246048	0.989072	0.954486	1.02491
ieu-a-1187	cardiac function	Major Depressive Disorder || id:ieu-a-1187	Inverse variance weighted	16	-0.0332111	0.0367959	0.366751	-0.105331	0.0389088	0.967334	0.900027	1.03968
ieu-a-1187	cardiac function	Major Depressive Disorder || id:ieu-a-1187	Inverse variance weighted	16	-0.0332111	0.0367959	0.366751	-0.105331	0.0389088	0.967334	0.900027	1.03968
ieu-a-12	cardiac function	Crohn's disease || id:ieu-a-12	Inverse variance weighted	82	-0.00243096	0.00333141	0.465569	-0.00896053	0.00409861	0.997572	0.991079	1.00411
ieu-a-12	cardiac function	Crohn's disease || id:ieu-a-12	Inverse variance weighted	82	-0.00243096	0.00333141	0.465569	-0.00896053	0.00409861	0.997572	0.991079	1.00411
ieu-a-1228	cardiac function	High grade and low grade serous ovarian cancer || id:ieu-a-1228	Inverse variance weighted	6	0.0136963	0.0178674	0.443349	-0.0213239	0.0487164	1.01379	0.978902	1.04992
ieu-a-1228	cardiac function	High grade and low grade serous ovarian cancer || id:ieu-a-1228	Inverse variance weighted	6	0.0136963	0.0178674	0.443349	-0.0213239	0.0487164	1.01379	0.978902	1.04992
ieu-a-1229	cardiac function	Serous ovarian cancer: low grade and low malignant potential || id:ieu-a-1229	Inverse variance weighted	5	-0.00231779	0.0141624	0.870001	-0.0300761	0.0254406	0.997685	0.970372	1.02577
ieu-a-1229	cardiac function	Serous ovarian cancer: low grade and low malignant potential || id:ieu-a-1229	Inverse variance weighted	5	-0.00231779	0.0141624	0.870001	-0.0300761	0.0254406	0.997685	0.970372	1.02577
ieu-a-1239	cardiac function	Years of schooling || id:ieu-a-1239	Inverse variance weighted	194	0.0176222	0.0219059	0.421137	-0.0253133	0.0605576	1.01778	0.975004	1.06243
ieu-a-1239	cardiac function	Years of schooling || id:ieu-a-1239	Inverse variance weighted	194	0.0176222	0.0219059	0.421137	-0.0253133	0.0605576	1.01778	0.975004	1.06243
ieu-a-1284	cardiac function	Estimated glomerular filtration rate (eGFR) || id:ieu-a-1284	Inverse variance weighted	32	9.6666e-05	0.023247	0.996682	-0.0454674	0.0456608	1.0001	0.955551	1.04672
ieu-a-1284	cardiac function	Estimated glomerular filtration rate (eGFR) || id:ieu-a-1284	Inverse variance weighted	32	9.6666e-05	0.023247	0.996682	-0.0454674	0.0456608	1.0001	0.955551	1.04672
ieu-a-2	cardiac function	Body mass index || id:ieu-a-2	Inverse variance weighted	53	-0.00526527	0.021549	0.806968	-0.0475013	0.0369708	0.994749	0.953609	1.03766
ieu-a-2	cardiac function	Body mass index || id:ieu-a-2	Inverse variance weighted	53	-0.00526527	0.021549	0.806968	-0.0475013	0.0369708	0.994749	0.953609	1.03766
ieu-a-22	cardiac function	Schizophrenia || id:ieu-a-22	Inverse variance weighted	47	-0.000109213	0.00721193	0.987918	-0.0142446	0.0140262	0.999891	0.985856	1.01412
ieu-a-22	cardiac function	Schizophrenia || id:ieu-a-22	Inverse variance weighted	47	-0.000109213	0.00721193	0.987918	-0.0142446	0.0140262	0.999891	0.985856	1.01412
ieu-a-23	cardiac function	Type 2 diabetes || id:ieu-a-23	Inverse variance weighted	20	-0.0101307	0.00829491	0.221966	-0.0263888	0.00612731	0.98992	0.973956	1.00615
ieu-a-23	cardiac function	Type 2 diabetes || id:ieu-a-23	Inverse variance weighted	20	-0.0101307	0.00829491	0.221966	-0.0263888	0.00612731	0.98992	0.973956	1.00615
ieu-a-24	cardiac function	Type 2 diabetes || id:ieu-a-24	Inverse variance weighted	31	-0.0123088	0.00689534	0.0742469	-0.0258237	0.00120607	0.987767	0.974507	1.00121
ieu-a-24	cardiac function	Type 2 diabetes || id:ieu-a-24	Inverse variance weighted	31	-0.0123088	0.00689534	0.0742469	-0.0258237	0.00120607	0.987767	0.974507	1.00121
ieu-a-25	cardiac function	Type 2 diabetes || id:ieu-a-25	Inverse variance weighted	18	-0.00506364	0.0086646	0.558947	-0.0220463	0.011919	0.994949	0.978195	1.01199
ieu-a-25	cardiac function	Type 2 diabetes || id:ieu-a-25	Inverse variance weighted	18	-0.00506364	0.0086646	0.558947	-0.0220463	0.011919	0.994949	0.978195	1.01199
ieu-a-26	cardiac function	Type 2 diabetes || id:ieu-a-26	Inverse variance weighted	9	-0.0145285	0.0113904	0.202132	-0.0368537	0.00779674	0.985577	0.963817	1.00783
ieu-a-26	cardiac function	Type 2 diabetes || id:ieu-a-26	Inverse variance weighted	9	-0.0145285	0.0113904	0.202132	-0.0368537	0.00779674	0.985577	0.963817	1.00783
ieu-a-270	cardiac function	Haemoglobin concentration || id:ieu-a-270	Inverse variance weighted	8	-0.00312602	0.0328334	0.924149	-0.0674795	0.0612275	0.996879	0.934747	1.06314
ieu-a-270	cardiac function	Haemoglobin concentration || id:ieu-a-270	Inverse variance weighted	8	-0.00312602	0.0328334	0.924149	-0.0674795	0.0612275	0.996879	0.934747	1.06314
ieu-a-271	cardiac function	Mean cell haemoglobin || id:ieu-a-271	Inverse variance weighted	21	0.00663972	0.00841042	0.429841	-0.00984471	0.0231241	1.00666	0.990204	1.02339
ebi-a-GCST004133	cardiac function	Ulcerative colitis || id:ebi-a-GCST004133	Inverse variance weighted	30	0.000936369	0.00603131	0.876623	-0.010885	0.0127577	1.00094	0.989174	1.01284
ieu-a-271	cardiac function	Mean cell haemoglobin || id:ieu-a-271	Inverse variance weighted	21	0.00663972	0.00841042	0.429841	-0.00984471	0.0231241	1.00666	0.990204	1.02339
ieu-a-272	cardiac function	Mean cell haemoglobin concentration || id:ieu-a-272	Inverse variance weighted	6	0.0876099	0.100632	0.383975	-0.109629	0.284849	1.09156	0.896166	1.32956
ieu-a-272	cardiac function	Mean cell haemoglobin concentration || id:ieu-a-272	Inverse variance weighted	6	0.0876099	0.100632	0.383975	-0.109629	0.284849	1.09156	0.896166	1.32956
ieu-a-273	cardiac function	Mean cell volume || id:ieu-a-273	Inverse variance weighted	25	0.00402388	0.00309329	0.193313	-0.00203897	0.0100867	1.00403	0.997963	1.01014
ieu-a-273	cardiac function	Mean cell volume || id:ieu-a-273	Inverse variance weighted	25	0.00402388	0.00309329	0.193313	-0.00203897	0.0100867	1.00403	0.997963	1.01014
ieu-a-274	cardiac function	Packed cell volume || id:ieu-a-274	Inverse variance weighted	8	-0.0179996	0.00940043	0.055522	-0.0364245	0.000425194	0.982161	0.964231	1.00043
ieu-a-274	cardiac function	Packed cell volume || id:ieu-a-274	Inverse variance weighted	8	-0.0179996	0.00940043	0.055522	-0.0364245	0.000425194	0.982161	0.964231	1.00043
ieu-a-275	cardiac function	Red blood cell count || id:ieu-a-275	Inverse variance weighted	17	-0.0943948	0.0456328	0.0385861	-0.183835	-0.00495452	0.909923	0.832073	0.995058
ieu-a-275	cardiac function	Red blood cell count || id:ieu-a-275	Inverse variance weighted	17	-0.0943948	0.0456328	0.0385861	-0.183835	-0.00495452	0.909923	0.832073	0.995058
ieu-a-276	cardiac function	Celiac disease || id:ieu-a-276	Inverse variance weighted	8	0.00308161	0.00627603	0.623418	-0.00921941	0.0153826	1.00309	0.990823	1.0155
ieu-a-276	cardiac function	Celiac disease || id:ieu-a-276	Inverse variance weighted	8	0.00308161	0.00627603	0.623418	-0.00921941	0.0153826	1.00309	0.990823	1.0155
ieu-a-292	cardiac function	Inflammatory bowel disease || id:ieu-a-292	Inverse variance weighted	85	-0.00432499	0.00379384	0.254284	-0.0117609	0.00311092	0.995684	0.988308	1.00312
ieu-a-292	cardiac function	Inflammatory bowel disease || id:ieu-a-292	Inverse variance weighted	85	-0.00432499	0.00379384	0.254284	-0.0117609	0.00311092	0.995684	0.988308	1.00312
ieu-a-293	cardiac function	Inflammatory bowel disease || id:ieu-a-293	Inverse variance weighted	6	-0.00278709	0.00495453	0.573752	-0.012498	0.00692379	0.997217	0.98758	1.00695
ieu-a-293	cardiac function	Inflammatory bowel disease || id:ieu-a-293	Inverse variance weighted	6	-0.00278709	0.00495453	0.573752	-0.012498	0.00692379	0.997217	0.98758	1.00695
ieu-a-294	cardiac function	Inflammatory bowel disease || id:ieu-a-294	Inverse variance weighted	91	-0.00178009	0.00406449	0.661415	-0.00974648	0.00618631	0.998221	0.990301	1.00621
ieu-a-294	cardiac function	Inflammatory bowel disease || id:ieu-a-294	Inverse variance weighted	91	-0.00178009	0.00406449	0.661415	-0.00974648	0.00618631	0.998221	0.990301	1.00621
ieu-a-297	cardiac function	Alzheimer's disease || id:ieu-a-297	Inverse variance weighted	6	0.0265042	0.0125662	0.0349301	0.00187448	0.051134	1.02686	1.00188	1.05246
ieu-a-297	cardiac function	Alzheimer's disease || id:ieu-a-297	Inverse variance weighted	6	0.0265042	0.0125662	0.0349301	0.00187448	0.051134	1.02686	1.00188	1.05246
ieu-a-298	cardiac function	Alzheimer's disease || id:ieu-a-298	Inverse variance weighted	14	0.00718148	0.0101344	0.478557	-0.0126819	0.0270449	1.00721	0.987398	1.02741
ieu-a-298	cardiac function	Alzheimer's disease || id:ieu-a-298	Inverse variance weighted	14	0.00718148	0.0101344	0.478557	-0.0126819	0.0270449	1.00721	0.987398	1.02741
ieu-a-299	cardiac function	HDL cholesterol || id:ieu-a-299	Inverse variance weighted	63	0.0462665	0.013842	0.000830356	0.0191362	0.0733968	1.04735	1.01932	1.07616
ieu-a-299	cardiac function	HDL cholesterol || id:ieu-a-299	Inverse variance weighted	63	0.0462665	0.013842	0.000830356	0.0191362	0.0733968	1.04735	1.01932	1.07616
ieu-a-30	cardiac function	Crohn's disease || id:ieu-a-30	Inverse variance weighted	26	-0.000751912	0.00343297	0.826629	-0.00748053	0.00597671	0.999248	0.992547	1.00599
ieu-a-30	cardiac function	Crohn's disease || id:ieu-a-30	Inverse variance weighted	26	-0.000751912	0.00343297	0.826629	-0.00748053	0.00597671	0.999248	0.992547	1.00599
ieu-a-300	cardiac function	LDL cholesterol || id:ieu-a-300	Inverse variance weighted	51	0.00769413	0.0115593	0.505654	-0.0149622	0.0303504	1.00772	0.985149	1.03082
ieu-a-300	cardiac function	LDL cholesterol || id:ieu-a-300	Inverse variance weighted	51	0.00769413	0.0115593	0.505654	-0.0149622	0.0303504	1.00772	0.985149	1.03082
ieu-a-301	cardiac function	Total cholesterol || id:ieu-a-301	Inverse variance weighted	59	0.0111254	0.00891652	0.21213	-0.00635096	0.0286018	1.01119	0.993669	1.02901
ieu-a-301	cardiac function	Total cholesterol || id:ieu-a-301	Inverse variance weighted	59	0.0111254	0.00891652	0.21213	-0.00635096	0.0286018	1.01119	0.993669	1.02901
ieu-a-302	cardiac function	Triglycerides || id:ieu-a-302	Inverse variance weighted	45	-0.0446155	0.0141141	0.00157193	-0.0722791	-0.0169519	0.956365	0.930271	0.983191
ieu-a-302	cardiac function	Triglycerides || id:ieu-a-302	Inverse variance weighted	45	-0.0446155	0.0141141	0.00157193	-0.0722791	-0.0169519	0.956365	0.930271	0.983191
ieu-a-31	cardiac function	Inflammatory bowel disease || id:ieu-a-31	Inverse variance weighted	36	-0.00134563	0.00454587	0.767221	-0.0102555	0.00756427	0.998655	0.989797	1.00759
ieu-a-31	cardiac function	Inflammatory bowel disease || id:ieu-a-31	Inverse variance weighted	36	-0.00134563	0.00454587	0.767221	-0.0102555	0.00756427	0.998655	0.989797	1.00759
ieu-a-32	cardiac function	Ulcerative colitis || id:ieu-a-32	Inverse variance weighted	23	-0.00367601	0.00477291	0.441192	-0.0130309	0.0056789	0.996331	0.987054	1.0057
ieu-a-32	cardiac function	Ulcerative colitis || id:ieu-a-32	Inverse variance weighted	23	-0.00367601	0.00477291	0.441192	-0.0130309	0.0056789	0.996331	0.987054	1.0057
ieu-a-44	cardiac function	Asthma || id:ieu-a-44	Inverse variance weighted	5	-0.0151587	0.010957	0.16652	-0.0366345	0.00631703	0.984956	0.964028	1.00634
ieu-a-44	cardiac function	Asthma || id:ieu-a-44	Inverse variance weighted	5	-0.0151587	0.010957	0.16652	-0.0366345	0.00631703	0.984956	0.964028	1.00634
ieu-a-48	cardiac function	Hip circumference || id:ieu-a-48	Inverse variance weighted	37	-0.0307715	0.0251226	0.220631	-0.0800117	0.0184688	0.969697	0.923106	1.01864
ieu-a-48	cardiac function	Hip circumference || id:ieu-a-48	Inverse variance weighted	37	-0.0307715	0.0251226	0.220631	-0.0800117	0.0184688	0.969697	0.923106	1.01864
ieu-a-49	cardiac function	Hip circumference || id:ieu-a-49	Inverse variance weighted	39	-0.0519729	0.0210158	0.0133971	-0.0931638	-0.0107819	0.949355	0.911044	0.989276
ieu-a-49	cardiac function	Hip circumference || id:ieu-a-49	Inverse variance weighted	39	-0.0519729	0.0210158	0.0133971	-0.0931638	-0.0107819	0.949355	0.911044	0.989276
ieu-a-50	cardiac function	Hip circumference || id:ieu-a-50	Inverse variance weighted	16	-0.0308586	0.0282619	0.274887	-0.0862519	0.0245348	0.969613	0.917363	1.02484
ieu-a-50	cardiac function	Hip circumference || id:ieu-a-50	Inverse variance weighted	16	-0.0308586	0.0282619	0.274887	-0.0862519	0.0245348	0.969613	0.917363	1.02484
ieu-a-51	cardiac function	Hip circumference || id:ieu-a-51	Inverse variance weighted	12	-0.0549869	0.0350905	0.117114	-0.123764	0.0137905	0.946498	0.883588	1.01389
ieu-a-51	cardiac function	Hip circumference || id:ieu-a-51	Inverse variance weighted	12	-0.0549869	0.0350905	0.117114	-0.123764	0.0137905	0.946498	0.883588	1.01389
ieu-a-52	cardiac function	Hip circumference || id:ieu-a-52	Inverse variance weighted	15	-0.0482762	0.0302184	0.110138	-0.107504	0.0109519	0.952871	0.898073	1.01101
ieu-a-52	cardiac function	Hip circumference || id:ieu-a-52	Inverse variance weighted	15	-0.0482762	0.0302184	0.110138	-0.107504	0.0109519	0.952871	0.898073	1.01101
ieu-a-53	cardiac function	Hip circumference || id:ieu-a-53	Inverse variance weighted	11	-0.0428563	0.0433451	0.322799	-0.127813	0.0421001	0.958049	0.880018	1.043
ieu-a-53	cardiac function	Hip circumference || id:ieu-a-53	Inverse variance weighted	11	-0.0428563	0.0433451	0.322799	-0.127813	0.0421001	0.958049	0.880018	1.043
ieu-a-54	cardiac function	Hip circumference || id:ieu-a-54	Inverse variance weighted	59	-0.0186539	0.0231355	0.420076	-0.0639994	0.0266916	0.981519	0.938006	1.02705
ieu-a-54	cardiac function	Hip circumference || id:ieu-a-54	Inverse variance weighted	59	-0.0186539	0.0231355	0.420076	-0.0639994	0.0266916	0.981519	0.938006	1.02705
ieu-a-55	cardiac function	Hip circumference || id:ieu-a-55	Inverse variance weighted	59	-0.0300401	0.0221268	0.174578	-0.0734086	0.0133283	0.970407	0.929221	1.01342
ieu-a-55	cardiac function	Hip circumference || id:ieu-a-55	Inverse variance weighted	59	-0.0300401	0.0221268	0.174578	-0.0734086	0.0133283	0.970407	0.929221	1.01342
ieu-a-56	cardiac function	Hip circumference || id:ieu-a-56	Inverse variance weighted	32	-0.011314	0.0249817	0.650627	-0.0602781	0.0376501	0.98875	0.941503	1.03837
ieu-a-56	cardiac function	Hip circumference || id:ieu-a-56	Inverse variance weighted	32	-0.011314	0.0249817	0.650627	-0.0602781	0.0376501	0.98875	0.941503	1.03837
ieu-a-57	cardiac function	Hip circumference || id:ieu-a-57	Inverse variance weighted	32	-0.00667243	0.0262675	0.799481	-0.0581568	0.0448119	0.99335	0.943502	1.04583
ieu-a-57	cardiac function	Hip circumference || id:ieu-a-57	Inverse variance weighted	32	-0.00667243	0.0262675	0.799481	-0.0581568	0.0448119	0.99335	0.943502	1.04583
ieu-a-58	cardiac function	Hip circumference || id:ieu-a-58	Inverse variance weighted	23	-0.0133592	0.0295896	0.651642	-0.0713547	0.0446364	0.98673	0.931132	1.04565
ieu-a-58	cardiac function	Hip circumference || id:ieu-a-58	Inverse variance weighted	23	-0.0133592	0.0295896	0.651642	-0.0713547	0.0446364	0.98673	0.931132	1.04565
ieu-a-59	cardiac function	Hip circumference || id:ieu-a-59	Inverse variance weighted	24	-0.0185625	0.0283305	0.512332	-0.0740902	0.0369653	0.981609	0.928588	1.03766
ieu-a-59	cardiac function	Hip circumference || id:ieu-a-59	Inverse variance weighted	24	-0.0185625	0.0283305	0.512332	-0.0740902	0.0369653	0.981609	0.928588	1.03766
ieu-a-60	cardiac function	Waist circumference || id:ieu-a-60	Inverse variance weighted	34	-0.0228199	0.0299114	0.445512	-0.0814462	0.0358064	0.977438	0.921782	1.03646
ieu-a-60	cardiac function	Waist circumference || id:ieu-a-60	Inverse variance weighted	34	-0.0228199	0.0299114	0.445512	-0.0814462	0.0358064	0.977438	0.921782	1.03646
ieu-a-61	cardiac function	Waist circumference || id:ieu-a-61	Inverse variance weighted	29	-0.0298363	0.0277734	0.282699	-0.0842722	0.0245996	0.970604	0.919181	1.0249
ieu-a-61	cardiac function	Waist circumference || id:ieu-a-61	Inverse variance weighted	29	-0.0298363	0.0277734	0.282699	-0.0842722	0.0245996	0.970604	0.919181	1.0249
ieu-a-62	cardiac function	Waist circumference || id:ieu-a-62	Inverse variance weighted	14	-0.051681	0.0308172	0.0935387	-0.112083	0.00872067	0.949632	0.89397	1.00876
ieu-a-62	cardiac function	Waist circumference || id:ieu-a-62	Inverse variance weighted	14	-0.051681	0.0308172	0.0935387	-0.112083	0.00872067	0.949632	0.89397	1.00876
ieu-a-63	cardiac function	Waist circumference || id:ieu-a-63	Inverse variance weighted	12	-0.0549869	0.0350905	0.117114	-0.123764	0.0137905	0.946498	0.883588	1.01389
ieu-a-63	cardiac function	Waist circumference || id:ieu-a-63	Inverse variance weighted	12	-0.0549869	0.0350905	0.117114	-0.123764	0.0137905	0.946498	0.883588	1.01389
ieu-a-64	cardiac function	Waist circumference || id:ieu-a-64	Inverse variance weighted	15	-0.0527187	0.0281469	0.0610704	-0.107887	0.00244919	0.948647	0.897729	1.00245
ieu-a-64	cardiac function	Waist circumference || id:ieu-a-64	Inverse variance weighted	15	-0.0527187	0.0281469	0.0610704	-0.107887	0.00244919	0.948647	0.897729	1.00245
ieu-a-65	cardiac function	Waist circumference || id:ieu-a-65	Inverse variance weighted	13	-0.0658481	0.0272834	0.0158009	-0.119324	-0.0123726	0.936273	0.88752	0.987704
ieu-a-65	cardiac function	Waist circumference || id:ieu-a-65	Inverse variance weighted	13	-0.0658481	0.0272834	0.0158009	-0.119324	-0.0123726	0.936273	0.88752	0.987704
ieu-a-66	cardiac function	Waist circumference || id:ieu-a-66	Inverse variance weighted	48	-0.0261944	0.0273847	0.338803	-0.0798684	0.0274796	0.974146	0.923238	1.02786
ieu-a-66	cardiac function	Waist circumference || id:ieu-a-66	Inverse variance weighted	48	-0.0261944	0.0273847	0.338803	-0.0798684	0.0274796	0.974146	0.923238	1.02786
ieu-a-67	cardiac function	Waist circumference || id:ieu-a-67	Inverse variance weighted	52	-0.0208807	0.0261393	0.424394	-0.0721137	0.0303524	0.979336	0.930425	1.03082
ieu-a-67	cardiac function	Waist circumference || id:ieu-a-67	Inverse variance weighted	52	-0.0208807	0.0261393	0.424394	-0.0721137	0.0303524	0.979336	0.930425	1.03082
ieu-a-68	cardiac function	Waist circumference || id:ieu-a-68	Inverse variance weighted	19	-0.0683049	0.029832	0.0220414	-0.126776	-0.00983423	0.933976	0.880931	0.990214
ieu-a-68	cardiac function	Waist circumference || id:ieu-a-68	Inverse variance weighted	19	-0.0683049	0.029832	0.0220414	-0.126776	-0.00983423	0.933976	0.880931	0.990214
ieu-a-69	cardiac function	Waist circumference || id:ieu-a-69	Inverse variance weighted	17	-0.0698201	0.0314888	0.0266026	-0.131538	-0.00810206	0.932562	0.876746	0.991931
ieu-a-69	cardiac function	Waist circumference || id:ieu-a-69	Inverse variance weighted	17	-0.0698201	0.0314888	0.0266026	-0.131538	-0.00810206	0.932562	0.876746	0.991931
ieu-a-7	cardiac function	Coronary heart disease || id:ieu-a-7	Inverse variance weighted	28	-0.00848619	0.00834152	0.30899	-0.0248356	0.00786318	0.99155	0.97547	1.00789
ieu-a-7	cardiac function	Coronary heart disease || id:ieu-a-7	Inverse variance weighted	28	-0.00848619	0.00834152	0.30899	-0.0248356	0.00786318	0.99155	0.97547	1.00789
ieu-a-70	cardiac function	Waist circumference || id:ieu-a-70	Inverse variance weighted	14	-0.0119422	0.0367184	0.745002	-0.0839102	0.0600258	0.988129	0.919514	1.06186
ieu-a-70	cardiac function	Waist circumference || id:ieu-a-70	Inverse variance weighted	14	-0.0119422	0.0367184	0.745002	-0.0839102	0.0600258	0.988129	0.919514	1.06186
ieu-a-71	cardiac function	Waist circumference || id:ieu-a-71	Inverse variance weighted	18	0.0223662	0.0276989	0.419391	-0.0319236	0.076656	1.02262	0.968581	1.07967
ieu-a-71	cardiac function	Waist circumference || id:ieu-a-71	Inverse variance weighted	18	0.0223662	0.0276989	0.419391	-0.0319236	0.076656	1.02262	0.968581	1.07967
ieu-a-72	cardiac function	Waist-to-hip ratio || id:ieu-a-72	Inverse variance weighted	26	-0.0393437	0.0392565	0.316236	-0.116287	0.037599	0.96142	0.89022	1.03831
ieu-a-72	cardiac function	Waist-to-hip ratio || id:ieu-a-72	Inverse variance weighted	26	-0.0393437	0.0392565	0.316236	-0.116287	0.037599	0.96142	0.89022	1.03831
ieu-a-73	cardiac function	Waist-to-hip ratio || id:ieu-a-73	Inverse variance weighted	22	-0.0123357	0.0396842	0.755917	-0.0901168	0.0654453	0.98774	0.913824	1.06763
ieu-a-73	cardiac function	Waist-to-hip ratio || id:ieu-a-73	Inverse variance weighted	22	-0.0123357	0.0396842	0.755917	-0.0901168	0.0654453	0.98774	0.913824	1.06763
ieu-a-74	cardiac function	Waist-to-hip ratio || id:ieu-a-74	Inverse variance weighted	19	-0.0561293	0.0296142	0.0580455	-0.114173	0.00191443	0.945417	0.892104	1.00192
ebi-a-GCST004137	cardiac function	Optic cup area || id:ebi-a-GCST004137	Inverse variance weighted	8	0.0290369	0.0713074	0.683855	-0.110726	0.168799	1.02946	0.895184	1.18388
ieu-a-74	cardiac function	Waist-to-hip ratio || id:ieu-a-74	Inverse variance weighted	19	-0.0561293	0.0296142	0.0580455	-0.114173	0.00191443	0.945417	0.892104	1.00192
ieu-a-75	cardiac function	Waist-to-hip ratio || id:ieu-a-75	Inverse variance weighted	19	-0.0512074	0.0281155	0.0685576	-0.106314	0.00389893	0.950082	0.899142	1.00391
ieu-a-75	cardiac function	Waist-to-hip ratio || id:ieu-a-75	Inverse variance weighted	19	-0.0512074	0.0281155	0.0685576	-0.106314	0.00389893	0.950082	0.899142	1.00391
ieu-a-755	cardiac function	Years of schooling || id:ieu-a-755	Inverse variance weighted	4	0.180903	0.0761435	0.0175101	0.0316618	0.330144	1.1983	1.03217	1.39117
ieu-a-755	cardiac function	Years of schooling || id:ieu-a-755	Inverse variance weighted	4	0.180903	0.0761435	0.0175101	0.0316618	0.330144	1.1983	1.03217	1.39117
ieu-a-76	cardiac function	Waist-to-hip ratio || id:ieu-a-76	Inverse variance weighted	5	0.0332914	0.0563913	0.554946	-0.0772356	0.143818	1.03385	0.925672	1.15467
ieu-a-76	cardiac function	Waist-to-hip ratio || id:ieu-a-76	Inverse variance weighted	5	0.0332914	0.0563913	0.554946	-0.0772356	0.143818	1.03385	0.925672	1.15467
ieu-a-77	cardiac function	Waist-to-hip ratio || id:ieu-a-77	Inverse variance weighted	6	-0.0373871	0.0563463	0.506994	-0.147826	0.0730515	0.963303	0.862581	1.07579
ieu-a-77	cardiac function	Waist-to-hip ratio || id:ieu-a-77	Inverse variance weighted	6	-0.0373871	0.0563463	0.506994	-0.147826	0.0730515	0.963303	0.862581	1.07579
ieu-a-78	cardiac function	Waist-to-hip ratio || id:ieu-a-78	Inverse variance weighted	28	-0.0539261	0.0276796	0.0513878	-0.108178	0.000325868	0.947502	0.897468	1.00033
ieu-a-78	cardiac function	Waist-to-hip ratio || id:ieu-a-78	Inverse variance weighted	28	-0.0539261	0.0276796	0.0513878	-0.108178	0.000325868	0.947502	0.897468	1.00033
ieu-a-780	cardiac function	HDL cholesterol || id:ieu-a-780	Inverse variance weighted	30	0.0253333	0.0116293	0.0293755	0.00253995	0.0481266	1.02566	1.00254	1.0493
ieu-a-780	cardiac function	HDL cholesterol || id:ieu-a-780	Inverse variance weighted	30	0.0253333	0.0116293	0.0293755	0.00253995	0.0481266	1.02566	1.00254	1.0493
ieu-a-781	cardiac function	LDL cholesterol || id:ieu-a-781	Inverse variance weighted	27	0.00406334	0.0121031	0.737077	-0.0196588	0.0277854	1.00407	0.980533	1.02818
ieu-a-781	cardiac function	LDL cholesterol || id:ieu-a-781	Inverse variance weighted	27	0.00406334	0.0121031	0.737077	-0.0196588	0.0277854	1.00407	0.980533	1.02818
ieu-a-782	cardiac function	Total cholesterol || id:ieu-a-782	Inverse variance weighted	28	0.00808098	0.0105469	0.443558	-0.0125909	0.0287528	1.00811	0.987488	1.02917
ieu-a-782	cardiac function	Total cholesterol || id:ieu-a-782	Inverse variance weighted	28	0.00808098	0.0105469	0.443558	-0.0125909	0.0287528	1.00811	0.987488	1.02917
ieu-a-783	cardiac function	Triglycerides || id:ieu-a-783	Inverse variance weighted	21	-0.0421277	0.0141753	0.00295959	-0.0699113	-0.0143441	0.958747	0.932476	0.985758
ieu-a-783	cardiac function	Triglycerides || id:ieu-a-783	Inverse variance weighted	21	-0.0421277	0.0141753	0.00295959	-0.0699113	-0.0143441	0.958747	0.932476	0.985758
ieu-a-785	cardiac function	Body mass index || id:ieu-a-785	Inverse variance weighted	22	-0.032027	0.0274665	0.243598	-0.0858614	0.0218073	0.96848	0.917721	1.02205
ieu-a-785	cardiac function	Body mass index || id:ieu-a-785	Inverse variance weighted	22	-0.032027	0.0274665	0.243598	-0.0858614	0.0218073	0.96848	0.917721	1.02205
ieu-a-79	cardiac function	Waist-to-hip ratio || id:ieu-a-79	Inverse variance weighted	30	-0.0413921	0.0292052	0.1564	-0.0986343	0.0158501	0.959453	0.906074	1.01598
ieu-a-79	cardiac function	Waist-to-hip ratio || id:ieu-a-79	Inverse variance weighted	30	-0.0413921	0.0292052	0.1564	-0.0986343	0.0158501	0.959453	0.906074	1.01598
ieu-a-795	cardiac function	Urate || id:ieu-a-795	Inverse variance weighted	4	-0.00313048	0.013515	0.816825	-0.0296198	0.0233589	0.996874	0.970815	1.02363
ieu-a-795	cardiac function	Urate || id:ieu-a-795	Inverse variance weighted	4	-0.00313048	0.013515	0.816825	-0.0296198	0.0233589	0.996874	0.970815	1.02363
ieu-a-798	cardiac function	Myocardial infarction || id:ieu-a-798	Inverse variance weighted	20	-0.00626875	0.00862246	0.467211	-0.0231688	0.0106313	0.993751	0.977098	1.01069
ieu-a-798	cardiac function	Myocardial infarction || id:ieu-a-798	Inverse variance weighted	20	-0.00626875	0.00862246	0.467211	-0.0231688	0.0106313	0.993751	0.977098	1.01069
ieu-a-8	cardiac function	Coronary heart disease || id:ieu-a-8	Inverse variance weighted	13	-0.0134314	0.00925981	0.146917	-0.0315807	0.0047178	0.986658	0.968913	1.00473
ieu-a-8	cardiac function	Coronary heart disease || id:ieu-a-8	Inverse variance weighted	13	-0.0134314	0.00925981	0.146917	-0.0315807	0.0047178	0.986658	0.968913	1.00473
ieu-a-80	cardiac function	Waist-to-hip ratio || id:ieu-a-80	Inverse variance weighted	26	-0.0422568	0.0231881	0.0684024	-0.0877055	0.00319192	0.958624	0.916031	1.0032
ieu-a-80	cardiac function	Waist-to-hip ratio || id:ieu-a-80	Inverse variance weighted	26	-0.0422568	0.0231881	0.0684024	-0.0877055	0.00319192	0.958624	0.916031	1.0032
ieu-a-800	cardiac function	Bipolar disorder || id:ieu-a-800	Inverse variance weighted	4	0.00179495	0.0124497	0.885361	-0.0226064	0.0261963	1.0018	0.977647	1.02654
ieu-a-800	cardiac function	Bipolar disorder || id:ieu-a-800	Inverse variance weighted	4	0.00179495	0.0124497	0.885361	-0.0226064	0.0261963	1.0018	0.977647	1.02654
ieu-a-801	cardiac function	Bipolar disorder || id:ieu-a-801	Inverse variance weighted	4	0.00179495	0.0124497	0.885361	-0.0226064	0.0261963	1.0018	0.977647	1.02654
ieu-a-801	cardiac function	Bipolar disorder || id:ieu-a-801	Inverse variance weighted	4	0.00179495	0.0124497	0.885361	-0.0226064	0.0261963	1.0018	0.977647	1.02654
ieu-a-81	cardiac function	Waist-to-hip ratio || id:ieu-a-81	Inverse variance weighted	26	-0.0531541	0.0223243	0.0172659	-0.0969098	-0.00939843	0.948234	0.907638	0.990646
ieu-a-81	cardiac function	Waist-to-hip ratio || id:ieu-a-81	Inverse variance weighted	26	-0.0531541	0.0223243	0.0172659	-0.0969098	-0.00939843	0.948234	0.907638	0.990646
ieu-a-82	cardiac function	Waist-to-hip ratio || id:ieu-a-82	Inverse variance weighted	4	-0.0324472	0.0619504	0.600445	-0.15387	0.0889756	0.968074	0.857384	1.09305
ieu-a-82	cardiac function	Waist-to-hip ratio || id:ieu-a-82	Inverse variance weighted	4	-0.0324472	0.0619504	0.600445	-0.15387	0.0889756	0.968074	0.857384	1.09305
ieu-a-83	cardiac function	Waist-to-hip ratio || id:ieu-a-83	Inverse variance weighted	4	0.00236499	0.0625635	0.969846	-0.120259	0.124989	1.00237	0.88669	1.13314
ieu-a-83	cardiac function	Waist-to-hip ratio || id:ieu-a-83	Inverse variance weighted	4	0.00236499	0.0625635	0.969846	-0.120259	0.124989	1.00237	0.88669	1.13314
ieu-a-831	cardiac function	Rheumatoid arthritis || id:ieu-a-831	Inverse variance weighted	4	0.0165725	0.00952866	0.081995	-0.00210368	0.0352487	1.01671	0.997899	1.03588
ieu-a-831	cardiac function	Rheumatoid arthritis || id:ieu-a-831	Inverse variance weighted	4	0.0165725	0.00952866	0.081995	-0.00210368	0.0352487	1.01671	0.997899	1.03588
ieu-a-832	cardiac function	Rheumatoid arthritis || id:ieu-a-832	Inverse variance weighted	25	0.00315505	0.00520828	0.544663	-0.00705317	0.0133633	1.00316	0.992972	1.01345
ieu-a-832	cardiac function	Rheumatoid arthritis || id:ieu-a-832	Inverse variance weighted	25	0.00315505	0.00520828	0.544663	-0.00705317	0.0133633	1.00316	0.992972	1.01345
ieu-a-833	cardiac function	Rheumatoid arthritis || id:ieu-a-833	Inverse variance weighted	30	0.00222258	0.00708084	0.753607	-0.0116559	0.016101	1.00223	0.988412	1.01623
ieu-a-833	cardiac function	Rheumatoid arthritis || id:ieu-a-833	Inverse variance weighted	30	0.00222258	0.00708084	0.753607	-0.0116559	0.016101	1.00223	0.988412	1.01623
ieu-a-834	cardiac function	Rheumatoid arthritis || id:ieu-a-834	Inverse variance weighted	4	-0.0058555	0.010639	0.582059	-0.026708	0.014997	0.994162	0.973646	1.01511
ieu-a-834	cardiac function	Rheumatoid arthritis || id:ieu-a-834	Inverse variance weighted	4	-0.0058555	0.010639	0.582059	-0.026708	0.014997	0.994162	0.973646	1.01511
ieu-a-835	cardiac function	Body mass index || id:ieu-a-835	Inverse variance weighted	47	0.0144179	0.0231714	0.533791	-0.030998	0.0598338	1.01452	0.969478	1.06166
ieu-a-835	cardiac function	Body mass index || id:ieu-a-835	Inverse variance weighted	47	0.0144179	0.0231714	0.533791	-0.030998	0.0598338	1.01452	0.969478	1.06166
ieu-a-85	cardiac function	Extreme body mass index || id:ieu-a-85	Inverse variance weighted	7	-0.00520777	0.0110957	0.638821	-0.0269554	0.0165399	0.994806	0.973405	1.01668
ieu-a-85	cardiac function	Extreme body mass index || id:ieu-a-85	Inverse variance weighted	7	-0.00520777	0.0110957	0.638821	-0.0269554	0.0165399	0.994806	0.973405	1.01668
ieu-a-86	cardiac function	Extreme height || id:ieu-a-86	Inverse variance weighted	37	0.000855327	0.00388755	0.825858	-0.00676427	0.00847492	1.00086	0.993259	1.00851
ieu-a-86	cardiac function	Extreme height || id:ieu-a-86	Inverse variance weighted	37	0.000855327	0.00388755	0.825858	-0.00676427	0.00847492	1.00086	0.993259	1.00851
ieu-a-89	cardiac function	Height || id:ieu-a-89	Inverse variance weighted	242	-0.0110086	0.00980917	0.261743	-0.0302346	0.00821733	0.989052	0.970218	1.00825
ieu-a-89	cardiac function	Height || id:ieu-a-89	Inverse variance weighted	242	-0.0110086	0.00980917	0.261743	-0.0302346	0.00821733	0.989052	0.970218	1.00825
ieu-a-9	cardiac function	Coronary heart disease || id:ieu-a-9	Inverse variance weighted	8	-0.0135224	0.0132535	0.307591	-0.0394991	0.0124544	0.986569	0.961271	1.01253
ieu-a-9	cardiac function	Coronary heart disease || id:ieu-a-9	Inverse variance weighted	8	-0.0135224	0.0132535	0.307591	-0.0394991	0.0124544	0.986569	0.961271	1.01253
ieu-a-90	cardiac function	Obesity class 1 || id:ieu-a-90	Inverse variance weighted	14	-0.020238	0.011421	0.0763959	-0.0426232	0.00214725	0.979965	0.958272	1.00215
ieu-a-90	cardiac function	Obesity class 1 || id:ieu-a-90	Inverse variance weighted	14	-0.020238	0.011421	0.0763959	-0.0426232	0.00214725	0.979965	0.958272	1.00215
ieu-a-91	cardiac function	Obesity class 2 || id:ieu-a-91	Inverse variance weighted	10	-0.0105489	0.0106625	0.322493	-0.0314474	0.0103496	0.989507	0.969042	1.0104
ebi-a-GCST004296	cardiac function	Atrial fibrillation || id:ebi-a-GCST004296	Inverse variance weighted	19	0.0147751	0.0139052	0.287981	-0.0124791	0.0420294	1.01488	0.987598	1.04293
ieu-a-91	cardiac function	Obesity class 2 || id:ieu-a-91	Inverse variance weighted	10	-0.0105489	0.0106625	0.322493	-0.0314474	0.0103496	0.989507	0.969042	1.0104
ieu-a-93	cardiac function	Overweight || id:ieu-a-93	Inverse variance weighted	12	-0.0100588	0.019812	0.611654	-0.0488904	0.0287727	0.989992	0.952285	1.02919
ieu-a-93	cardiac function	Overweight || id:ieu-a-93	Inverse variance weighted	12	-0.0100588	0.019812	0.611654	-0.0488904	0.0287727	0.989992	0.952285	1.02919
ieu-a-94	cardiac function	Body mass index || id:ieu-a-94	Inverse variance weighted	9	-0.0632216	0.036232	0.0810009	-0.134236	0.00779323	0.938735	0.874383	1.00782
ieu-a-94	cardiac function	Body mass index || id:ieu-a-94	Inverse variance weighted	9	-0.0632216	0.036232	0.0810009	-0.134236	0.00779323	0.938735	0.874383	1.00782
ieu-a-95	cardiac function	Body mass index || id:ieu-a-95	Inverse variance weighted	10	-0.06186	0.0272216	0.0230585	-0.115214	-0.00850574	0.940014	0.891175	0.99153
ieu-a-95	cardiac function	Body mass index || id:ieu-a-95	Inverse variance weighted	10	-0.06186	0.0272216	0.0230585	-0.115214	-0.00850574	0.940014	0.891175	0.99153
ieu-a-96	cardiac function	Height || id:ieu-a-96	Inverse variance weighted	25	0.00353169	0.0210126	0.866525	-0.0376531	0.0447165	1.00354	0.963047	1.04573
ieu-a-96	cardiac function	Height || id:ieu-a-96	Inverse variance weighted	25	0.00353169	0.0210126	0.866525	-0.0376531	0.0447165	1.00354	0.963047	1.04573
ieu-a-968	cardiac function	Ulcerative colitis || id:ieu-a-968	Inverse variance weighted	53	-0.00208471	0.0052149	0.689333	-0.0123059	0.00813649	0.997917	0.98777	1.00817
ieu-a-968	cardiac function	Ulcerative colitis || id:ieu-a-968	Inverse variance weighted	53	-0.00208471	0.0052149	0.689333	-0.0123059	0.00813649	0.997917	0.98777	1.00817
ieu-a-97	cardiac function	Height || id:ieu-a-97	Inverse variance weighted	41	-0.0125708	0.0164123	0.443713	-0.044739	0.0195973	0.987508	0.956247	1.01979
ieu-a-97	cardiac function	Height || id:ieu-a-97	Inverse variance weighted	41	-0.0125708	0.0164123	0.443713	-0.044739	0.0195973	0.987508	0.956247	1.01979
ieu-a-970	cardiac function	Ulcerative colitis || id:ieu-a-970	Inverse variance weighted	57	0.00614441	0.00496561	0.215942	-0.0035882	0.015877	1.00616	0.996418	1.016
ieu-a-970	cardiac function	Ulcerative colitis || id:ieu-a-970	Inverse variance weighted	57	0.00614441	0.00496561	0.215942	-0.0035882	0.015877	1.00616	0.996418	1.016
ieu-a-973	cardiac function	Ulcerative colitis || id:ieu-a-973	Inverse variance weighted	25	-0.0031253	0.00593982	0.598776	-0.0147673	0.00851675	0.99688	0.985341	1.00855
ieu-a-973	cardiac function	Ulcerative colitis || id:ieu-a-973	Inverse variance weighted	25	-0.0031253	0.00593982	0.598776	-0.0147673	0.00851675	0.99688	0.985341	1.00855
ieu-a-974	cardiac function	Body mass index || id:ieu-a-974	Inverse variance weighted	24	-0.0403176	0.0203626	0.0477047	-0.0802283	-0.00040703	0.960484	0.922906	0.999593
ieu-a-974	cardiac function	Body mass index || id:ieu-a-974	Inverse variance weighted	24	-0.0403176	0.0203626	0.0477047	-0.0802283	-0.00040703	0.960484	0.922906	0.999593
ieu-a-975	cardiac function	Paget's disease || id:ieu-a-975	Inverse variance weighted	4	0.00129915	0.00336794	0.699689	-0.00530201	0.00790031	1.0013	0.994712	1.00793
ieu-a-975	cardiac function	Paget's disease || id:ieu-a-975	Inverse variance weighted	4	0.00129915	0.00336794	0.699689	-0.00530201	0.00790031	1.0013	0.994712	1.00793
ieu-a-976	cardiac function	Type 2 diabetes || id:ieu-a-976	Inverse variance weighted	5	-0.000817618	0.00177847	0.645708	-0.00430341	0.00266817	0.999183	0.995706	1.00267
ieu-a-976	cardiac function	Type 2 diabetes || id:ieu-a-976	Inverse variance weighted	5	-0.000817618	0.00177847	0.645708	-0.00430341	0.00266817	0.999183	0.995706	1.00267
ieu-a-980	cardiac function	Femoral neck bone mineral density || id:ieu-a-980	Inverse variance weighted	15	-0.0290548	0.0178199	0.103003	-0.0639818	0.00587228	0.971363	0.938022	1.00589
ieu-a-980	cardiac function	Femoral neck bone mineral density || id:ieu-a-980	Inverse variance weighted	15	-0.0290548	0.0178199	0.103003	-0.0639818	0.00587228	0.971363	0.938022	1.00589
ieu-a-982	cardiac function	Lumbar spine bone mineral density || id:ieu-a-982	Inverse variance weighted	11	-0.00240124	0.0185025	0.896741	-0.0386661	0.0338636	0.997602	0.962072	1.03444
ieu-a-982	cardiac function	Lumbar spine bone mineral density || id:ieu-a-982	Inverse variance weighted	11	-0.00240124	0.0185025	0.896741	-0.0386661	0.0338636	0.997602	0.962072	1.03444
ieu-a-984	cardiac function	Lung adenocarcinoma || id:ieu-a-984	Inverse variance weighted	8	-0.00542265	0.0105005	0.605561	-0.0260036	0.0151583	0.994592	0.974332	1.01527
ieu-a-984	cardiac function	Lung adenocarcinoma || id:ieu-a-984	Inverse variance weighted	8	-0.00542265	0.0105005	0.605561	-0.0260036	0.0151583	0.994592	0.974332	1.01527
ieu-a-985	cardiac function	Lung cancer || id:ieu-a-985	Inverse variance weighted	4	0.00857737	0.0110641	0.438197	-0.0131083	0.0302631	1.00861	0.986977	1.03073
ieu-a-985	cardiac function	Lung cancer || id:ieu-a-985	Inverse variance weighted	4	0.00857737	0.0110641	0.438197	-0.0131083	0.0302631	1.00861	0.986977	1.03073
ieu-a-987	cardiac function	Lung cancer || id:ieu-a-987	Inverse variance weighted	6	0.0144026	0.0108421	0.184049	-0.00684799	0.0356531	1.01451	0.993175	1.0363
ieu-a-987	cardiac function	Lung cancer || id:ieu-a-987	Inverse variance weighted	6	0.0144026	0.0108421	0.184049	-0.00684799	0.0356531	1.01451	0.993175	1.0363
ieu-a-989	cardiac function	Squamous cell lung cancer || id:ieu-a-989	Inverse variance weighted	5	-0.000272962	0.0108774	0.97998	-0.0215927	0.0210468	0.999727	0.978639	1.02127
ieu-a-989	cardiac function	Squamous cell lung cancer || id:ieu-a-989	Inverse variance weighted	5	-0.000272962	0.0108774	0.97998	-0.0215927	0.0210468	0.999727	0.978639	1.02127
ieu-a-996	cardiac function	Eczema || id:ieu-a-996	Inverse variance weighted	5	-0.000445251	0.01136	0.968735	-0.0227109	0.0218204	0.999555	0.977545	1.02206
ieu-a-996	cardiac function	Eczema || id:ieu-a-996	Inverse variance weighted	5	-0.000445251	0.01136	0.968735	-0.0227109	0.0218204	0.999555	0.977545	1.02206
[truncated: 4,260 more rows]
